# Supplementary material for: The mechanism of H2 and H2O desorption from bridging hydroxyls of a TiO2(110) surface
Source: Royal Society of Chemistry journal article supplement (doi:10.1039/c6cy02007k), 2016-12-02
Supplement: c6cy02007k1.pdf [file c6cy02007k1.pdf]

# **The Mechanism of H<sub>2</sub> and H<sub>2</sub>O Desorption from Bridging Hydroxyls of TiO<sub>2</sub>(110) surface**

Ruimin Wang<sup>a,b</sup>, Hongjun Fan<sup>\*,a,b</sup>

a, State Key Laboratory of Molecular Reaction Dynamics, Dalian Institute of Chemical Physics, Chinese Academy of Sciences, 457 Zhongshan Road, Dalian 116023, Liaoning Province, P. R. China

b, University of Chinese Academy of Sciences, 19 A Yuquan Road, Shijingshan District, Beijing 100049, P.R.China

\* Correspondence and requests for materials should be addressed to Hongjun Fan (email:fanhj@dicp.ac.cn)

**Pathway H<sub>2</sub>\_C:** We calculated the Pathway H<sub>2</sub>\_C where the proton of BBOH can also transfer to Ti<sub>5c</sub> directly in the case of 1/4 ML H adatoms on stoichiometric TiO<sub>2</sub>(110) surface. We calculated the barrier using CI-NEB method, and the barrier we got is 2.19eV, shown in Supplementary Fig. 1.

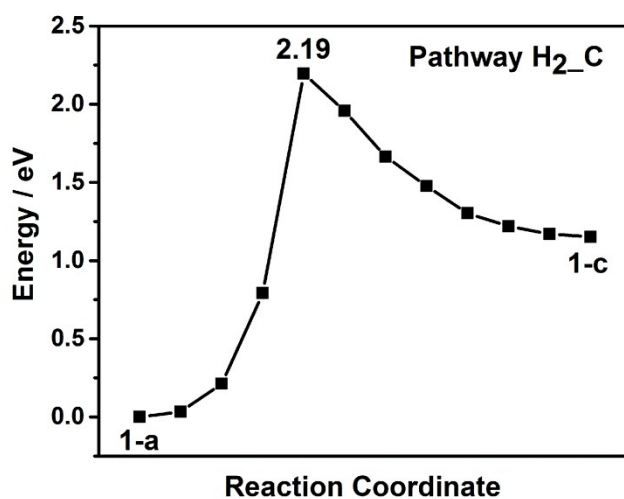

Supplementary Fig. 1. Calculated energy pathway for H transferred from BBO site to Ti<sub>5c</sub> site by CI-NEB method.

**Pathway H<sub>2</sub>\_D:** We calculated the Pathway H<sub>2</sub>\_D where H<sub>2</sub> has been formed by the coupling of O<sub>s</sub>-H and Ti<sub>5c</sub>-H in the case of 1/4 ML H adatoms on stoichiometric TiO<sub>2</sub>(110) surface. However, the intermediate ready for dehydrogenation (one O<sub>s</sub>-H, another Ti<sub>5c</sub>-H) is higher in energy than TS1-3 by 0.45 eV. The side views of structures shown in Supplementary Fig. 2 are expressed by simplified schematic diagrams.

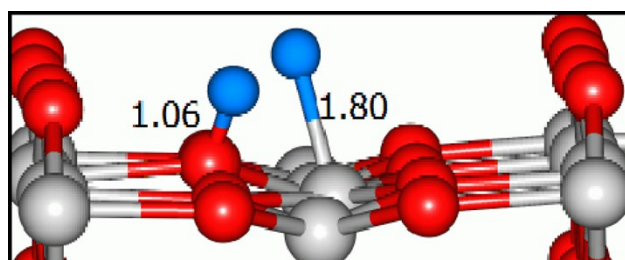

Supplementary Fig. 2. The side view of optimized structure for one H adsorbed on O<sub>s</sub> site, another one adsorbed on Ti<sub>5c</sub> site on stoichiometric TiO<sub>2</sub>(110) surface.

**Pathway H<sub>2</sub>\_H:** We calculated the Pathway H<sub>2</sub>\_H where H<sub>2</sub> has been formed by the coupling of O<sub>s</sub>-H and Ti<sub>5c-Ov</sub>-H in the case of two adjacent O<sub>v</sub>s are near the H adatoms. The barrier for O<sub>s</sub>-H and Ti<sub>5c-Ov</sub>-H to produce H<sub>2</sub> (TS9-H5) is 073 eV, shown in Supplementary Fig. 3.

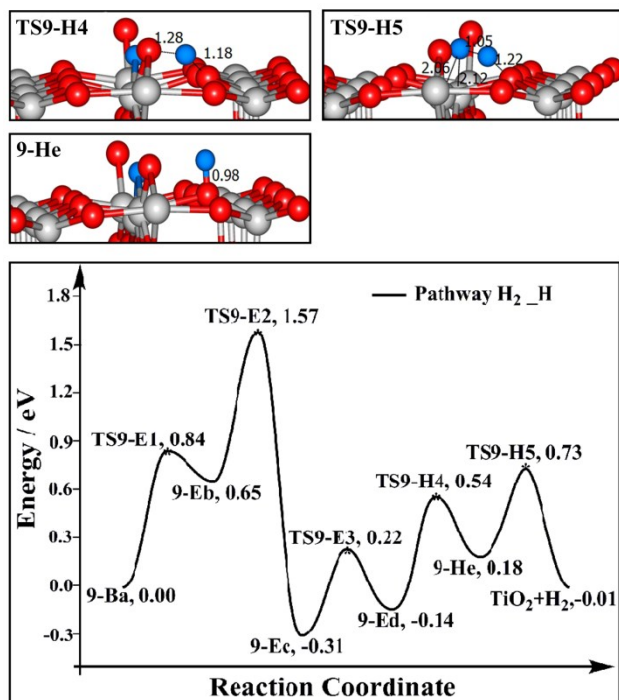

Supplementary Fig. 3. Reaction profiles for H<sub>2</sub> desorption of the model where two BBOHs are on the different sides of two adjacent O<sub>v</sub>s. The side views of selected intermediates and transition states are shown in the figure with simplified schematic diagrams.

**The optimized each structure of Cartesian coordinates from theory.**

1-a:

|    |             |             |             |
|----|-------------|-------------|-------------|
| Ti | 3.247200000 | 3.247194072 | 1.478700000 |
| Ti | 3.247200000 | 3.247194072 | 4.436100000 |
| Ti | 0.000000000 | 3.247194072 | 2.957400000 |
| Ti | 0.000000000 | 3.247194072 | 0.000000000 |

|    |             |             |              |
|----|-------------|-------------|--------------|
| Ti | 3.247200000 | 3.247194072 | 7.393500000  |
| Ti | 3.247200000 | 3.247194072 | 10.350900000 |
| Ti | 0.000000000 | 3.247194072 | 8.872200000  |
| Ti | 0.000000000 | 3.247194072 | 5.914800000  |
| Ti | 9.741600000 | 3.247194072 | 1.478700000  |
| Ti | 9.741600000 | 3.247194072 | 4.436100000  |
| Ti | 6.494400000 | 3.247194072 | 2.957400000  |
| Ti | 6.494400000 | 3.247194072 | 0.000000000  |
| Ti | 9.741600000 | 3.247194072 | 7.393500000  |
| Ti | 9.741600000 | 3.247194072 | 10.350900000 |
| Ti | 6.494400000 | 3.247194072 | 8.872200000  |
| Ti | 6.494400000 | 3.247194072 | 5.914800000  |
| Ti | 0.000000000 | 6.494391717 | 4.436100000  |
| Ti | 0.000000000 | 6.494391717 | 1.478700000  |
| Ti | 3.247200000 | 6.494391717 | 2.957400000  |
| Ti | 3.247200000 | 6.494391717 | 0.000000000  |
| Ti | 0.000000000 | 6.494391717 | 10.350900000 |
| Ti | 0.000000000 | 6.494391717 | 7.393500000  |
| Ti | 3.247200000 | 6.494391717 | 8.872200000  |
| Ti | 3.247200000 | 6.494391717 | 5.914800000  |
| Ti | 6.494400000 | 6.494391717 | 4.436100000  |
| Ti | 6.494400000 | 6.494391717 | 1.478700000  |

|    |              |             |              |
|----|--------------|-------------|--------------|
| Ti | 9.741600000  | 6.494391717 | 2.957400000  |
| Ti | 9.741600000  | 6.494391717 | 0.000000000  |
| Ti | 6.494400000  | 6.494391717 | 10.350900000 |
| Ti | 6.494400000  | 6.494391717 | 7.393500000  |
| Ti | 9.741600000  | 6.494391717 | 8.872200000  |
| Ti | 9.741600000  | 6.494391717 | 5.914800000  |
| Ti | 3.239750534  | 9.734016938 | 1.483067843  |
| Ti | 3.238702597  | 9.734082661 | 4.440169264  |
| Ti | -0.015243006 | 9.767025914 | 2.969034175  |
| Ti | -0.014309112 | 9.798047485 | 0.011762526  |
| Ti | 3.240646241  | 9.734328765 | 7.397113233  |
| Ti | 3.242575727  | 9.733417217 | 10.354831449 |
| Ti | -0.013703574 | 9.788314065 | 8.888719800  |
| Ti | -0.014132204 | 9.769175839 | 5.930881868  |
| Ti | 9.720011965  | 9.734152313 | 1.479569476  |
| Ti | 9.720429555  | 9.734873479 | 4.436690179  |
| Ti | 6.478094380  | 9.832957782 | 2.967577123  |
| Ti | 6.478921637  | 9.832815263 | 0.010514267  |
| Ti | 9.720316682  | 9.734760964 | 7.393470189  |
| Ti | 9.719828303  | 9.733302202 | 10.351358160 |
| Ti | 6.479336369  | 9.832187324 | 8.881702718  |
| Ti | 6.478513918  | 9.832874200 | 5.924207608  |

|    |              |              |              |
|----|--------------|--------------|--------------|
| Ti | -0.029639143 | 13.111264152 | 1.481443048  |
| Ti | -0.028238560 | 13.046265621 | 4.468369493  |
| Ti | 3.219304734  | 12.985528720 | 2.966842978  |
| Ti | 3.218277190  | 12.985169744 | 5.925332366  |
| Ti | 6.465872309  | 13.166224223 | 1.510773358  |
| Ti | 6.465377436  | 13.165262668 | 4.468989364  |
| Ti | 9.711335576  | 12.986329540 | 2.968146009  |
| Ti | 9.712311555  | 12.986799601 | 5.925074481  |
| Ti | -0.028746942 | 13.103490632 | 7.464792149  |
| Ti | -0.030234549 | 13.177827175 | 10.388929916 |
| Ti | 3.217899865  | 12.984756476 | 8.882741593  |
| Ti | 3.219279535  | 12.984334278 | 0.008991324  |
| Ti | 6.465407050  | 13.166181361 | 7.425789248  |
| Ti | 6.465519923  | 13.165354466 | 10.382416302 |
| Ti | 9.710841093  | 12.984642890 | 8.882286863  |
| Ti | 9.710531959  | 12.984483226 | 0.010381539  |
| Ti | 9.672016401  | 16.296612250 | 1.493751983  |
| Ti | 9.675475058  | 16.296251845 | 4.450490117  |
| Ti | 6.437800265  | 16.613581354 | 2.972670831  |
| Ti | -0.054704020 | 16.354601290 | 5.933317464  |
| Ti | 3.204434766  | 16.290427152 | 1.492165160  |
| Ti | 3.200439671  | 16.289847433 | 4.452101900  |

|    |              |              |              |
|----|--------------|--------------|--------------|
| Ti | -0.052908318 | 16.367674791 | 2.967787099  |
| Ti | 6.438510363  | 16.614739006 | 5.927784406  |
| Ti | 3.204007694  | 16.291942351 | 7.409399574  |
| Ti | 3.201162367  | 16.300188076 | 10.365284675 |
| Ti | -0.055192918 | 16.539319821 | 8.887870671  |
| Ti | 6.436940796  | 16.615066906 | 0.014398871  |
| Ti | 9.671825595  | 16.297050164 | 7.407081682  |
| Ti | 9.671787798  | 16.295224568 | 10.365133493 |
| Ti | 6.436906246  | 16.616464232 | 8.886912828  |
| Ti | -0.055330210 | 16.552929822 | 0.014922804  |
| Ti | 6.432271712  | 19.984993159 | 7.406598325  |
| Ti | 6.420098739  | 19.983367232 | 10.365221624 |
| Ti | 3.187835988  | 19.541981797 | 8.890055125  |
| Ti | 3.170476198  | 19.544441763 | 0.022434955  |
| Ti | 6.427009040  | 19.981030496 | 1.492714054  |
| Ti | 6.433483048  | 19.984071610 | 4.450846306  |
| Ti | 3.187657133  | 19.528243208 | 2.976567619  |
| Ti | 3.182714764  | 19.532002987 | 5.931849648  |
| Ti | -0.082170396 | 19.878824938 | 1.407754458  |
| Ti | -0.073819247 | 19.623350691 | 4.452674098  |
| Ti | 9.680865280  | 19.537964484 | 2.976498061  |
| Ti | 9.684589949  | 19.537903762 | 5.932260253  |

|    |              |              |              |
|----|--------------|--------------|--------------|
| Ti | -0.067488896 | 19.859940317 | 7.497889950  |
| Ti | -0.065902054 | 19.999928691 | 10.364675214 |
| Ti | 9.674074346  | 19.537464418 | 8.891967143  |
| Ti | 9.671424111  | 19.540999882 | 0.015762469  |
| O  | 0.000000000  | 1.266694833  | 2.957400000  |
| O  | 0.000000000  | 1.266694833  | 0.000000000  |
| O  | 0.000000000  | 1.266694833  | 8.872200000  |
| O  | 0.000000000  | 1.266694833  | 5.914800000  |
| O  | 6.494400000  | 1.266694833  | 2.957400000  |
| O  | 6.494400000  | 1.266694833  | 0.000000000  |
| O  | 6.494400000  | 1.266694833  | 8.872200000  |
| O  | 6.494400000  | 1.266694833  | 5.914800000  |
| O  | 9.741600000  | 1.980495667  | 8.872200000  |
| O  | 9.741600000  | 1.980495667  | 5.914800000  |
| O  | 9.741600000  | 1.980495667  | 2.957400000  |
| O  | 9.741600000  | 1.980495667  | 0.000000000  |
| O  | 3.247200000  | 1.980495667  | 8.872200000  |
| O  | 3.247200000  | 1.980495667  | 5.914800000  |
| O  | 3.247200000  | 1.980495667  | 2.957400000  |
| O  | 3.247200000  | 1.980495667  | 0.000000000  |
| O  | 1.266698949  | 3.247194072  | 1.478700000  |
| O  | 1.266698949  | 3.247194072  | 4.436100000  |



|   |              |             |              |
|---|--------------|-------------|--------------|
| O | 5.227599738  | 3.247194072 | 1.478700000  |
| O | 5.227599738  | 3.247194072 | 4.436100000  |
| O | 1.266698949  | 3.247194072 | 7.393500000  |
| O | 1.266698949  | 3.247194072 | 10.350900000 |
| O | 5.227599738  | 3.247194072 | 7.393500000  |
| O | 5.227599738  | 3.247194072 | 10.350900000 |
| O | 7.761098949  | 3.247194072 | 1.478700000  |
| O | 7.761098949  | 3.247194072 | 4.436100000  |
| O | 11.721999738 | 3.247194072 | 1.478700000  |
| O | 11.721999738 | 3.247194072 | 4.436100000  |
| O | 7.761098949  | 3.247194072 | 7.393500000  |
| O | 7.761098949  | 3.247194072 | 10.350900000 |
| O | 11.721999738 | 3.247194072 | 7.393500000  |
| O | 11.721999738 | 3.247194072 | 10.350900000 |
| O | 9.741600000  | 4.513896049 | 8.872200000  |
| O | 9.741600000  | 4.513896049 | 5.914800000  |
| O | 9.741600000  | 4.513896049 | 2.957400000  |
| O | 9.741600000  | 4.513896049 | 0.000000000  |
| O | 3.247200000  | 4.513896049 | 8.872200000  |
| O | 3.247200000  | 4.513896049 | 5.914800000  |
| O | 3.247200000  | 4.513896049 | 2.957400000  |
| O | 3.247200000  | 4.513896049 | 0.000000000  |

|   |              |             |              |
|---|--------------|-------------|--------------|
| O | 0.000000000  | 5.227596870 | 2.957400000  |
| O | 0.000000000  | 5.227596870 | 0.000000000  |
| O | 0.000000000  | 5.227596870 | 8.872200000  |
| O | 0.000000000  | 5.227596870 | 5.914800000  |
| O | 6.494400000  | 5.227596870 | 0.000000000  |
| O | 6.494400000  | 5.227596870 | 2.957400000  |
| O | 6.494400000  | 5.227596870 | 8.872200000  |
| O | 6.494400000  | 5.227596870 | 5.914800000  |
| O | 8.474899752  | 6.494391717 | 7.393500000  |
| O | 11.008298949 | 6.494391717 | 7.393500000  |
| O | 8.474899752  | 6.494391717 | 10.350900000 |
| O | 11.008298949 | 6.494391717 | 10.350900000 |
| O | 8.474899752  | 6.494391717 | 1.478700000  |
| O | 11.008298949 | 6.494391717 | 1.478700000  |
| O | 8.474899752  | 6.494391717 | 4.436100000  |
| O | 11.008298949 | 6.494391717 | 4.436100000  |
| O | 1.980499752  | 6.494391717 | 1.478700000  |
| O | 4.513898949  | 6.494391717 | 1.478700000  |
| O | 1.980499752  | 6.494391717 | 4.436100000  |
| O | 4.513898949  | 6.494391717 | 4.436100000  |
| O | 1.980499752  | 6.494391717 | 7.393500000  |
| O | 4.513898949  | 6.494391717 | 7.393500000  |

|   |             |             |              |
|---|-------------|-------------|--------------|
| O | 1.980499752 | 6.494391717 | 10.350900000 |
| O | 4.513898949 | 6.494391717 | 10.350900000 |
| O | 0.000000000 | 7.761086550 | 8.872200000  |
| O | 0.000000000 | 7.761086550 | 5.914800000  |
| O | 6.494400000 | 7.761086550 | 2.957400000  |
| O | 6.494400000 | 7.761086550 | 0.000000000  |
| O | 0.000000000 | 7.761086550 | 2.957400000  |
| O | 0.000000000 | 7.761086550 | 0.000000000  |
| O | 6.494400000 | 7.761086550 | 8.872200000  |
| O | 6.494400000 | 7.761086550 | 5.914800000  |
| O | 3.247200000 | 8.474887384 | 2.957400000  |
| O | 3.247200000 | 8.474887384 | 0.000000000  |
| O | 3.247200000 | 8.474887384 | 8.872200000  |
| O | 3.247200000 | 8.474887384 | 5.914800000  |
| O | 9.741600000 | 8.474887384 | 2.957400000  |
| O | 9.741600000 | 8.474887384 | 0.000000000  |
| O | 9.741600000 | 8.474887384 | 8.872200000  |
| O | 9.741600000 | 8.474887384 | 5.914800000  |
| O | 1.264453965 | 9.784467846 | 1.485857263  |
| O | 1.264546185 | 9.781337435 | 4.442060107  |
| O | 5.205126257 | 9.773178507 | 1.483397416  |
| O | 5.205234453 | 9.773214226 | 4.441082036  |

|   |              |              |              |
|---|--------------|--------------|--------------|
| O | 1.264843109  | 9.782360069  | 7.399672804  |
| O | 1.264690231  | 9.785785876  | 10.358046853 |
| O | 5.205408633  | 9.773318525  | 7.398361966  |
| O | 5.205288876  | 9.773788944  | 10.355805853 |
| O | 7.763332114  | 9.781907153  | 1.483364766  |
| O | 7.763055972  | 9.781781422  | 4.440650492  |
| O | 11.705093776 | 9.776652177  | 1.486036836  |
| O | 11.705180801 | 9.773056348  | 4.442327101  |
| O | 7.763180794  | 9.781938943  | 7.398118039  |
| O | 7.763436414  | 9.782096463  | 10.355560508 |
| O | 11.705181191 | 9.774150063  | 7.400061288  |
| O | 11.705141575 | 9.777795542  | 10.357919093 |
| O | 9.736787520  | 11.064516932 | 2.961259998  |
| O | 9.736447343  | 11.064233681 | 0.003792097  |
| O | 3.232481352  | 11.063871490 | 2.961681605  |
| O | 3.232903747  | 11.063902209 | 0.004132316  |
| O | 3.232493561  | 11.064114022 | 8.875574512  |
| O | 3.232168062  | 11.063462508 | 5.918320726  |
| O | 9.737042620  | 11.064110807 | 8.875594504  |
| O | 9.737026644  | 11.064241539 | 5.917949158  |
| O | 6.465189618  | 11.788392303 | 8.877276909  |
| O | -0.029699930 | 11.805289878 | 2.969011462  |

|   |              |              |              |
|---|--------------|--------------|--------------|
| O | 6.465238845  | 11.788394446 | 0.004864805  |
| O | 6.465163380  | 11.788753064 | 5.919853487  |
| O | -0.029233502 | 11.811532125 | 0.012453493  |
| O | -0.029315332 | 11.800277077 | 5.927298800  |
| O | 6.465096098  | 11.788426950 | 2.962372336  |
| O | -0.028951126 | 11.806314655 | 8.882515175  |
| O | 8.451648501  | 13.083946638 | 1.487491640  |
| O | 8.451633434  | 13.084276324 | 4.444692667  |
| O | 10.982657110 | 13.106249565 | 1.489491671  |
| O | 10.984245770 | 13.106473523 | 4.445310881  |
| O | 1.946065664  | 13.087671056 | 1.489652317  |
| O | 1.944518568  | 13.087769640 | 4.445312064  |
| O | 4.477025954  | 13.102256184 | 1.486742945  |
| O | 4.476983351  | 13.101966503 | 4.444838762  |
| O | 1.945624954  | 13.087576757 | 7.400180412  |
| O | 1.946357522  | 13.087758924 | 10.360045819 |
| O | 4.476887104  | 13.102609445 | 7.402568098  |
| O | 4.476910873  | 13.101401786 | 10.359125121 |
| O | 8.451729551  | 13.083936280 | 7.403076061  |
| O | 8.451974910  | 13.084071297 | 10.359742981 |
| O | 10.983100028 | 13.105642700 | 7.400444093  |
| O | 10.982276927 | 13.106940370 | 10.360402836 |

|   |              |              |              |
|---|--------------|--------------|--------------|
| O | -0.032450309 | 14.420044510 | 2.971730969  |
| O | -0.031823209 | 14.417038758 | 5.923575670  |
| O | -0.031185200 | 14.419759829 | 8.882881419  |
| O | -0.030246889 | 14.421621859 | 0.018966279  |
| O | 6.464133888  | 14.395759179 | 2.970872613  |
| O | 6.464972705  | 14.395940631 | 5.929190827  |
| O | 6.464071931  | 14.396639652 | 8.886937316  |
| O | 6.464557972  | 14.396734307 | 0.013157946  |
| O | 9.691312302  | 15.097399845 | 8.887188931  |
| O | 3.187326828  | 15.096591168 | 8.889796412  |
| O | 9.687998340  | 15.095842498 | 5.930462390  |
| O | 9.689525952  | 15.096015378 | 2.969445845  |
| O | 3.189396593  | 15.092470270 | 2.970197380  |
| O | 9.691131108  | 15.097969206 | 0.013719733  |
| O | 3.187545039  | 15.096654033 | 0.010735480  |
| O | 3.189615194  | 15.091976991 | 5.930827570  |
| O | 1.228573184  | 16.458298829 | 10.365759042 |
| O | 5.154566054  | 16.434316753 | 4.451324813  |
| O | 5.154273286  | 16.435857669 | 7.408558489  |
| O | 7.725120623  | 16.450265275 | 1.492616933  |
| O | 7.724493004  | 16.447025921 | 4.450090513  |
| O | 5.152782692  | 16.440089654 | 10.365790746 |

|   |              |              |              |
|---|--------------|--------------|--------------|
| O | 11.651558878 | 16.444356999 | 1.490720293  |
| O | 11.649468461 | 16.431058825 | 4.451417676  |
| O | 1.231855324  | 16.442429246 | 4.450442917  |
| O | 1.230456560  | 16.452203386 | 1.490771397  |
| O | 5.154160543  | 16.435567631 | 1.493375920  |
| O | 7.725056588  | 16.450250273 | 7.409896654  |
| O | 7.725947879  | 16.452824182 | 10.365114211 |
| O | 1.230624246  | 16.449200135 | 7.410203632  |
| O | 11.651508741 | 16.440724022 | 7.409662546  |
| O | 11.653447709 | 16.448578268 | 10.366901427 |
| O | 3.188613368  | 17.717796647 | 8.884376917  |
| O | 3.183352514  | 17.720080875 | 0.020798803  |
| O | 9.686155619  | 17.713462506 | 2.973530488  |
| O | 9.686200170  | 17.713201400 | 5.929563223  |
| O | 3.187215124  | 17.706931292 | 2.974616445  |
| O | 3.186162771  | 17.709566995 | 5.928219025  |
| O | 9.690197603  | 17.714550149 | 8.888883403  |
| O | 9.691770417  | 17.717850225 | 0.016292908  |
| O | 6.426927340  | 18.485500270 | 0.019135679  |
| O | 6.430952570  | 18.486217150 | 5.931158562  |
| O | -0.056334114 | 18.504698504 | 0.022214333  |
| O | 6.429678368  | 18.485066641 | 2.976448732  |

|   |              |              |              |
|---|--------------|--------------|--------------|
| O | -0.057813538 | 18.481989452 | 5.929923079  |
| O | 6.425354397  | 18.486957961 | 8.889088055  |
| O | -0.057067462 | 18.497370042 | 8.891157880  |
| O | -0.063294422 | 18.480518544 | 2.976497233  |
| O | 1.938826096  | 19.938041282 | 4.452068067  |
| O | 4.400060300  | 19.918149028 | 1.499135634  |
| O | 4.399997304  | 19.921421601 | 4.454377797  |
| O | 1.945625344  | 19.929431224 | 7.402215340  |
| O | 1.947543530  | 19.921342662 | 10.365527182 |
| O | 4.402084734  | 19.921020477 | 7.405831175  |
| O | 4.399438137  | 19.919522066 | 10.373202108 |
| O | 8.460654675  | 19.913945620 | 1.497702478  |
| O | 8.466772790  | 19.923602601 | 4.454162616  |
| O | 10.923070340 | 19.916066255 | 1.506423732  |
| O | 10.932773883 | 19.883842025 | 4.450867481  |
| O | 8.461616626  | 19.915155064 | 7.409683839  |
| O | 8.453258982  | 19.902995968 | 10.370854288 |
| O | 10.921995777 | 19.894773103 | 7.407887751  |
| O | 10.912176763 | 19.924893128 | 10.368761631 |
| O | 1.941989908  | 19.941055249 | 1.514057965  |
| O | 6.431385226  | 21.092371724 | 2.973898270  |
| O | 6.431773332  | 21.096310813 | 5.930165467  |



|   |              |              |              |
|---|--------------|--------------|--------------|
| O | -0.065782687 | 21.126604074 | 2.997771704  |
| O | -0.095209463 | 21.109018195 | 5.920145323  |
| O | -0.056883281 | 21.095388906 | 8.866023884  |
| O | -0.055911459 | 21.100353486 | 0.033487941  |
| O | 6.432459270  | 21.093794768 | 8.888034274  |
| O | 6.431715791  | 21.092806067 | 0.016971927  |
| H | 0.000000000  | 0.932897449  | 9.814799089  |
| H | 0.816399334  | 0.932897449  | 8.400899272  |
| H | 6.457698847  | 0.932897449  | 6.856699960  |
| H | 0.834099172  | 0.932897449  | -0.439201108 |
| H | 0.000000000  | 0.932897449  | 3.899999089  |
| H | 0.816399334  | 0.932897449  | 2.486099272  |
| H | 6.457698847  | 0.932897449  | 0.941899960  |
| H | 0.834099172  | 0.932897449  | 5.475598892  |
| H | 6.494400000  | 0.932897449  | 9.814799089  |
| H | 7.310799334  | 0.932897449  | 8.400899272  |
| H | -0.036701153 | 0.932897449  | 6.856699960  |
| H | 7.328499172  | 0.932897449  | -0.439201108 |
| H | 6.494400000  | 0.932897449  | 3.899999089  |
| H | 7.310799334  | 0.932897449  | 2.486099272  |
| H | -0.036701153 | 0.932897449  | 0.941899960  |
| H | 7.328499172  | 0.932897449  | 5.475598892  |

|   |             |              |             |
|---|-------------|--------------|-------------|
| H | 0.693795453 | 21.732312863 | 3.003256498 |
|---|-------------|--------------|-------------|

|   |             |              |             |
|---|-------------|--------------|-------------|
| H | 0.528124608 | 21.854629990 | 5.928285744 |
|---|-------------|--------------|-------------|

TS1-1:

|    |             |             |             |
|----|-------------|-------------|-------------|
| Ti | 3.247200000 | 3.247190143 | 1.478700000 |
|----|-------------|-------------|-------------|

|    |             |             |             |
|----|-------------|-------------|-------------|
| Ti | 3.247200000 | 3.247190143 | 4.436100000 |
|----|-------------|-------------|-------------|

|    |             |             |             |
|----|-------------|-------------|-------------|
| Ti | 0.000000000 | 3.247190143 | 2.957400000 |
|----|-------------|-------------|-------------|

|    |             |             |             |
|----|-------------|-------------|-------------|
| Ti | 0.000000000 | 3.247190143 | 0.000000000 |
|----|-------------|-------------|-------------|

|    |             |             |             |
|----|-------------|-------------|-------------|
| Ti | 3.247200000 | 3.247190143 | 7.393500000 |
|----|-------------|-------------|-------------|

|    |             |             |              |
|----|-------------|-------------|--------------|
| Ti | 3.247200000 | 3.247190143 | 10.350900000 |
|----|-------------|-------------|--------------|

|    |             |             |             |
|----|-------------|-------------|-------------|
| Ti | 0.000000000 | 3.247190143 | 8.872200000 |
|----|-------------|-------------|-------------|

|    |             |             |             |
|----|-------------|-------------|-------------|
| Ti | 0.000000000 | 3.247190143 | 5.914800000 |
|----|-------------|-------------|-------------|

|    |             |             |             |
|----|-------------|-------------|-------------|
| Ti | 9.741600000 | 3.247190143 | 1.478700000 |
|----|-------------|-------------|-------------|

|    |             |             |             |
|----|-------------|-------------|-------------|
| Ti | 9.741600000 | 3.247190143 | 4.436100000 |
|----|-------------|-------------|-------------|

|    |             |             |             |
|----|-------------|-------------|-------------|
| Ti | 6.494400000 | 3.247190143 | 2.957400000 |
|----|-------------|-------------|-------------|

|    |             |             |             |
|----|-------------|-------------|-------------|
| Ti | 6.494400000 | 3.247190143 | 0.000000000 |
|----|-------------|-------------|-------------|

|    |             |             |             |
|----|-------------|-------------|-------------|
| Ti | 9.741600000 | 3.247190143 | 7.393500000 |
|----|-------------|-------------|-------------|

|    |             |             |              |
|----|-------------|-------------|--------------|
| Ti | 9.741600000 | 3.247190143 | 10.350900000 |
|----|-------------|-------------|--------------|

|    |             |             |             |
|----|-------------|-------------|-------------|
| Ti | 6.494400000 | 3.247190143 | 8.872200000 |
|----|-------------|-------------|-------------|

|    |             |             |             |
|----|-------------|-------------|-------------|
| Ti | 6.494400000 | 3.247190143 | 5.914800000 |
|----|-------------|-------------|-------------|

|    |             |             |             |
|----|-------------|-------------|-------------|
| Ti | 0.000000000 | 6.494389931 | 4.436100000 |
|----|-------------|-------------|-------------|

|    |             |             |             |
|----|-------------|-------------|-------------|
| Ti | 0.000000000 | 6.494389931 | 1.478700000 |
|----|-------------|-------------|-------------|

|    |             |             |             |
|----|-------------|-------------|-------------|
| Ti | 3.247200000 | 6.494389931 | 2.957400000 |
|----|-------------|-------------|-------------|

|    |              |             |              |
|----|--------------|-------------|--------------|
| Ti | 3.247200000  | 6.494389931 | 0.000000000  |
| Ti | 0.000000000  | 6.494389931 | 10.350900000 |
| Ti | 0.000000000  | 6.494389931 | 7.393500000  |
| Ti | 3.247200000  | 6.494389931 | 8.872200000  |
| Ti | 3.247200000  | 6.494389931 | 5.914800000  |
| Ti | 6.494400000  | 6.494389931 | 4.436100000  |
| Ti | 6.494400000  | 6.494389931 | 1.478700000  |
| Ti | 9.741600000  | 6.494389931 | 2.957400000  |
| Ti | 9.741600000  | 6.494389931 | 0.000000000  |
| Ti | 6.494400000  | 6.494389931 | 10.350900000 |
| Ti | 6.494400000  | 6.494389931 | 7.393500000  |
| Ti | 9.741600000  | 6.494389931 | 8.872200000  |
| Ti | 9.741600000  | 6.494389931 | 5.914800000  |
| Ti | 3.244671860  | 9.731863084 | 1.483258773  |
| Ti | 3.244383119  | 9.734360912 | 4.440231251  |
| Ti | -0.007953562 | 9.784191738 | 2.958875151  |
| Ti | -0.011278824 | 9.799880940 | 0.000565337  |
| Ti | 3.245678102  | 9.733120392 | 7.397225969  |
| Ti | 3.246344947  | 9.732517456 | 10.354805661 |
| Ti | -0.008355955 | 9.806439658 | 8.878416455  |
| Ti | -0.010471181 | 9.764747400 | 5.921971932  |
| Ti | 9.726610795  | 9.736418682 | 1.479268767  |

|    |              |              |              |
|----|--------------|--------------|--------------|
| Ti | 9.727057220  | 9.732872502  | 4.435527921  |
| Ti | 6.485199124  | 9.836862937  | 2.957816757  |
| Ti | 6.484001816  | 9.837283707  | 0.000756385  |
| Ti | 9.726004478  | 9.735464271  | 7.392897518  |
| Ti | 9.723906137  | 9.730822590  | 10.350917390 |
| Ti | 6.485026762  | 9.837084395  | 8.871762305  |
| Ti | 6.485009617  | 9.836916516  | 5.914406548  |
| Ti | -0.027722515 | 13.123722573 | 1.442132695  |
| Ti | -0.025802771 | 13.039004668 | 4.448707278  |
| Ti | 3.221665188  | 12.985650165 | 2.965318853  |
| Ti | 3.222322941  | 12.986316681 | 5.923258874  |
| Ti | 6.468580863  | 13.172482902 | 1.503399613  |
| Ti | 6.468645028  | 13.171253098 | 4.461198507  |
| Ti | 9.717027528  | 12.986089865 | 2.961520841  |
| Ti | 9.711210494  | 12.985206535 | 5.918973483  |
| Ti | -0.027899423 | 13.115354332 | 7.440141629  |
| Ti | -0.026445846 | 13.190901034 | 10.370385244 |
| Ti | 3.221189279  | 12.984695396 | 8.879716410  |
| Ti | 3.221357224  | 12.981975039 | 0.007346891  |
| Ti | 6.468568394  | 13.172092494 | 7.418603476  |
| Ti | 6.467851672  | 13.172408249 | 10.375908839 |
| Ti | 9.716188062  | 12.984149611 | 8.877920440  |

|    |              |              |              |
|----|--------------|--------------|--------------|
| Ti | 9.710661588  | 12.984598241 | 0.003548525  |
| Ti | 9.699265214  | 16.297728468 | 1.479727401  |
| Ti | 9.702852591  | 16.294276229 | 4.436451576  |
| Ti | 6.458203721  | 16.627973600 | 2.959454210  |
| Ti | -0.027802916 | 16.366376407 | 5.925823649  |
| Ti | 3.220497495  | 16.287881104 | 1.475305260  |
| Ti | 3.220121080  | 16.300495259 | 4.437569828  |
| Ti | -0.034752963 | 16.352473868 | 2.950447153  |
| Ti | 6.466217551  | 16.628830141 | 5.915773813  |
| Ti | 3.222782745  | 16.304206104 | 7.395416750  |
| Ti | 3.219828702  | 16.298333904 | 10.350980323 |
| Ti | -0.031679943 | 16.560745848 | 8.883007523  |
| Ti | 6.459806799  | 16.637505923 | 0.001545301  |
| Ti | 9.701266139  | 16.288709070 | 7.397875296  |
| Ti | 9.701797381  | 16.301277862 | 10.356146901 |
| Ti | 6.459765884  | 16.631230813 | 8.874392025  |
| Ti | -0.036262262 | 16.677136839 | 0.007791329  |
| Ti | 6.464434579  | 19.994870170 | 7.399524106  |
| Ti | 3.327352976  | 19.525946121 | 2.913748303  |
| Ti | 3.200533190  | 19.548895204 | 8.879800636  |
| Ti | 3.193532616  | 19.538243806 | -0.015627493 |
| Ti | 6.484622291  | 20.006794592 | 1.475007982  |

|    |              |              |              |
|----|--------------|--------------|--------------|
| Ti | 6.468941173  | 19.996421802 | 4.441819612  |
| Ti | 6.461628089  | 19.997700184 | 10.353893835 |
| Ti | 3.219732585  | 19.569568632 | 5.942185997  |
| Ti | -0.004872748 | 20.019499831 | 1.565830919  |
| Ti | -0.204709333 | 19.574700377 | 4.462759541  |
| Ti | 9.677974623  | 19.539850088 | 2.945735778  |
| Ti | 9.660705104  | 19.532056566 | 5.949949409  |
| Ti | -0.043362459 | 19.878266651 | 7.530144419  |
| Ti | -0.034488901 | 20.039274213 | 10.438591997 |
| Ti | 9.718174439  | 19.538724941 | 8.894093987  |
| Ti | 9.734654109  | 19.550930471 | 0.008820978  |
| O  | 0.000000000  | 1.266689833  | 2.957400000  |
| O  | 0.000000000  | 1.266689833  | 0.000000000  |
| O  | 0.000000000  | 1.266689833  | 8.872200000  |
| O  | 0.000000000  | 1.266689833  | 5.914800000  |
| O  | 6.494400000  | 1.266689833  | 2.957400000  |
| O  | 6.494400000  | 1.266689833  | 0.000000000  |
| O  | 6.494400000  | 1.266689833  | 8.872200000  |
| O  | 6.494400000  | 1.266689833  | 5.914800000  |
| O  | 9.741600000  | 1.980499953  | 8.872200000  |
| O  | 9.741600000  | 1.980499953  | 5.914800000  |
| O  | 9.741600000  | 1.980499953  | 2.957400000  |

|   |              |             |              |
|---|--------------|-------------|--------------|
| O | 9.741600000  | 1.980499953 | 0.000000000  |
| O | 3.247200000  | 1.980499953 | 8.872200000  |
| O | 3.247200000  | 1.980499953 | 5.914800000  |
| O | 3.247200000  | 1.980499953 | 2.957400000  |
| O | 3.247200000  | 1.980499953 | 0.000000000  |
| O | 1.266699988  | 3.247190143 | 1.478700000  |
| O | 1.266699988  | 3.247190143 | 4.436100000  |
| O | 5.227599998  | 3.247190143 | 1.478700000  |
| O | 5.227599998  | 3.247190143 | 4.436100000  |
| O | 1.266699988  | 3.247190143 | 7.393500000  |
| O | 1.266699988  | 3.247190143 | 10.350900000 |
| O | 5.227599998  | 3.247190143 | 7.393500000  |
| O | 5.227599998  | 3.247190143 | 10.350900000 |
| O | 7.761099988  | 3.247190143 | 1.478700000  |
| O | 7.761099988  | 3.247190143 | 4.436100000  |
| O | 11.721999998 | 3.247190143 | 1.478700000  |
| O | 11.721999998 | 3.247190143 | 4.436100000  |
| O | 7.761099988  | 3.247190143 | 7.393500000  |
| O | 7.761099988  | 3.247190143 | 10.350900000 |
| O | 11.721999998 | 3.247190143 | 7.393500000  |
| O | 11.721999998 | 3.247190143 | 10.350900000 |
| O | 9.741600000  | 4.513899978 | 8.872200000  |

|   |              |             |              |
|---|--------------|-------------|--------------|
| O | 9.741600000  | 4.513899978 | 5.914800000  |
| O | 9.741600000  | 4.513899978 | 2.957400000  |
| O | 9.741600000  | 4.513899978 | 0.000000000  |
| O | 3.247200000  | 4.513899978 | 8.872200000  |
| O | 3.247200000  | 4.513899978 | 5.914800000  |
| O | 3.247200000  | 4.513899978 | 2.957400000  |
| O | 3.247200000  | 4.513899978 | 0.000000000  |
| O | 0.000000000  | 5.227600085 | 2.957400000  |
| O | 0.000000000  | 5.227600085 | 0.000000000  |
| O | 0.000000000  | 5.227600085 | 8.872200000  |
| O | 0.000000000  | 5.227600085 | 5.914800000  |
| O | 6.494400000  | 5.227600085 | 0.000000000  |
| O | 6.494400000  | 5.227600085 | 2.957400000  |
| O | 6.494400000  | 5.227600085 | 8.872200000  |
| O | 6.494400000  | 5.227600085 | 5.914800000  |
| O | 8.474900012  | 6.494389931 | 7.393500000  |
| O | 11.008299988 | 6.494389931 | 7.393500000  |
| O | 8.474900012  | 6.494389931 | 10.350900000 |
| O | 11.008299988 | 6.494389931 | 10.350900000 |
| O | 8.474900012  | 6.494389931 | 1.478700000  |
| O | 11.008299988 | 6.494389931 | 1.478700000  |
| O | 8.474900012  | 6.494389931 | 4.436100000  |



|   |              |             |              |
|---|--------------|-------------|--------------|
| O | 11.008299988 | 6.494389931 | 4.436100000  |
| O | 1.980500012  | 6.494389931 | 1.478700000  |
| O | 4.513899988  | 6.494389931 | 1.478700000  |
| O | 1.980500012  | 6.494389931 | 4.436100000  |
| O | 4.513899988  | 6.494389931 | 4.436100000  |
| O | 1.980500012  | 6.494389931 | 7.393500000  |
| O | 4.513899988  | 6.494389931 | 7.393500000  |
| O | 1.980500012  | 6.494389931 | 10.350900000 |
| O | 4.513899988  | 6.494389931 | 10.350900000 |
| O | 0.000000000  | 7.761090122 | 8.872200000  |
| O | 0.000000000  | 7.761090122 | 5.914800000  |
| O | 6.494400000  | 7.761090122 | 2.957400000  |
| O | 6.494400000  | 7.761090122 | 0.000000000  |
| O | 0.000000000  | 7.761090122 | 2.957400000  |
| O | 0.000000000  | 7.761090122 | 0.000000000  |
| O | 6.494400000  | 7.761090122 | 8.872200000  |
| O | 6.494400000  | 7.761090122 | 5.914800000  |
| O | 3.247200000  | 8.474889884 | 2.957400000  |
| O | 3.247200000  | 8.474889884 | 0.000000000  |
| O | 3.247200000  | 8.474889884 | 8.872200000  |
| O | 3.247200000  | 8.474889884 | 5.914800000  |
| O | 9.741600000  | 8.474889884 | 2.957400000  |

|   |              |              |              |
|---|--------------|--------------|--------------|
| O | 9.741600000  | 8.474889884  | 0.000000000  |
| O | 9.741600000  | 8.474889884  | 8.872200000  |
| O | 9.741600000  | 8.474889884  | 5.914800000  |
| O | 1.267688696  | 9.781808926  | 1.480291318  |
| O | 1.267935613  | 9.777638378  | 4.438772898  |
| O | 5.207875466  | 9.776067458  | 1.478371492  |
| O | 5.208261104  | 9.775794922  | 4.435779891  |
| O | 1.267917688  | 9.779729010  | 7.392988843  |
| O | 1.267846769  | 9.783747037  | 10.352034695 |
| O | 5.208130696  | 9.776120322  | 7.392838016  |
| O | 5.207763373  | 9.776040311  | 10.350270784 |
| O | 7.766143409  | 9.782032883  | 1.478201856  |
| O | 7.765973646  | 9.781643904  | 4.435622557  |
| O | 11.706757901 | 9.776653963  | 1.480945021  |
| O | 11.706731923 | 9.772672369  | 4.438450778  |
| O | 7.766056904  | 9.781392442  | 7.393137423  |
| O | 7.765924938  | 9.782285059  | 10.350516603 |
| O | 11.706454093 | 9.774336159  | 7.393546135  |
| O | 11.706435259 | 9.778629937  | 10.351573814 |
| O | 9.737338634  | 11.064188675 | 2.958672273  |
| O | 9.736225235  | 11.064392273 | 0.000649682  |
| O | 3.233775686  | 11.064301904 | 2.959554407  |

|   |              |              |              |
|---|--------------|--------------|--------------|
| O | 3.233413947  | 11.063668606 | 0.001371287  |
| O | 3.233750877  | 11.064688740 | 8.872224014  |
| O | 3.233139754  | 11.065743879 | 5.915678821  |
| O | 9.737023916  | 11.064054014 | 8.872158715  |
| O | 9.736702443  | 11.064297260 | 5.915057176  |
| O | 6.471611670  | 11.791005145 | 8.869580098  |
| O | -0.022199028 | 11.796958784 | 2.965012348  |
| O | 6.470819353  | 11.790839767 | -0.002393601 |
| O | 6.472249160  | 11.791316972 | 5.912608685  |
| O | -0.022352816 | 11.801517954 | 0.003557752  |
| O | -0.022705981 | 11.798618645 | 5.917830034  |
| O | 6.471599590  | 11.791411627 | 2.955371342  |
| O | -0.022036668 | 11.802415572 | 8.867907511  |
| O | 8.455832323  | 13.089474507 | 1.481306416  |
| O | 8.455821283  | 13.089900991 | 4.437279884  |
| O | 10.985531921 | 13.100498453 | 1.483005974  |
| O | 10.987507257 | 13.102776967 | 4.439054679  |
| O | 1.952512655  | 13.091368684 | 1.486191449  |
| O | 1.951208839  | 13.094898076 | 4.439514023  |
| O | 4.481680361  | 13.100743128 | 1.480823531  |
| O | 4.482414617  | 13.101818627 | 4.439934920  |
| O | 1.952213523  | 13.095830698 | 7.393929060  |

|   |              |              |              |
|---|--------------|--------------|--------------|
| O | 1.953349913  | 13.092094136 | 10.351801416 |
| O | 4.482260311  | 13.101118178 | 7.395597506  |
| O | 4.481361615  | 13.100049466 | 10.353814813 |
| O | 8.456154056  | 13.090278898 | 7.396966073  |
| O | 8.455657105  | 13.088327570 | 10.352600268 |
| O | 10.985817285 | 13.104277521 | 7.393316878  |
| O | 10.984733499 | 13.100652402 | 10.353731770 |
| O | -0.028853450 | 14.414261608 | 2.962826947  |
| O | -0.024442584 | 14.412967509 | 5.913769169  |
| O | -0.028053340 | 14.416522619 | 8.872528745  |
| O | -0.023740539 | 14.400010094 | 0.009903268  |
| O | 6.467534096  | 14.401790328 | 2.962754432  |
| O | 6.470436443  | 14.401092736 | 5.921094294  |
| O | 6.467534875  | 14.401897485 | 8.878457030  |
| O | 6.470762722  | 14.400387644 | 0.005324503  |
| O | 9.709753930  | 15.098996484 | 8.883375896  |
| O | 3.214952187  | 15.104082508 | 8.870280647  |
| O | 9.703055476  | 15.096121106 | 5.917386187  |
| O | 9.707587009  | 15.097581655 | 2.956833362  |
| O | 3.213806445  | 15.099442614 | 2.959624438  |
| O | 9.706467114  | 15.100362020 | 0.000748695  |
| O | 3.209125411  | 15.096275769 | -0.002813552 |

|   |              |              |              |
|---|--------------|--------------|--------------|
| O | 3.216128063  | 15.107891580 | 5.918159961  |
| O | 1.247086251  | 16.458574580 | 10.359136477 |
| O | 5.174769223  | 16.457956284 | 4.443596418  |
| O | 5.171871292  | 16.467828652 | 7.391239127  |
| O | 7.745457317  | 16.459547565 | 1.479704925  |
| O | 7.744107910  | 16.451404710 | 4.433766493  |
| O | 5.173282395  | 16.456386435 | 10.352716435 |
| O | 11.672153140 | 16.447480624 | 1.474988463  |
| O | 11.665648089 | 16.435697291 | 4.442477929  |
| O | 1.251540240  | 16.431280640 | 4.432120523  |
| O | 1.250082118  | 16.455080193 | 1.479828426  |
| O | 5.173455925  | 16.453792166 | 1.478704259  |
| O | 7.745475371  | 16.449147985 | 7.401293104  |
| O | 7.747819200  | 16.466004484 | 10.354923484 |
| O | 1.251451007  | 16.432887280 | 7.404037808  |
| O | 11.670230018 | 16.439414922 | 7.398027779  |
| O | 11.675051980 | 16.464307475 | 10.360426732 |
| O | 3.195496913  | 17.726596016 | 8.870365584  |
| O | 3.206997846  | 17.714813398 | -0.001585521 |
| O | 9.703063789  | 17.718546745 | 2.958578110  |
| O | 9.692926031  | 17.713096030 | 5.923226224  |
| O | 3.219374354  | 17.714562651 | 2.962331997  |

|   |              |              |              |
|---|--------------|--------------|--------------|
| O | 3.175103328  | 17.748279933 | 5.905842627  |
| O | 9.716520576  | 17.717555901 | 8.876595879  |
| O | 9.724899780  | 17.728253376 | 0.011174713  |
| O | 6.460550538  | 18.505432172 | 0.004277702  |
| O | 6.482869842  | 18.499855011 | 5.917283270  |
| O | -0.024429595 | 18.543827211 | 0.014813735  |
| O | 6.452430589  | 18.501856702 | 2.958185131  |
| O | -0.005917048 | 18.448341821 | 5.934514383  |
| O | 6.458676254  | 18.500756558 | 8.870938728  |
| O | -0.024029280 | 18.492957320 | 8.880910134  |
| O | -0.061773564 | 18.464708612 | 2.964243778  |
| O | 1.996457922  | 20.140755747 | 4.348855635  |
| O | 4.459792154  | 19.931855827 | 1.444011236  |
| O | 4.438401030  | 19.904494022 | 4.455719155  |
| O | 1.970707496  | 19.975012206 | 7.386534140  |
| O | 1.973960021  | 19.941438157 | 10.355146708 |
| O | 4.430277055  | 19.909097840 | 7.376258831  |
| O | 4.436241642  | 19.913909901 | 10.342713680 |
| O | 8.488436939  | 19.931434701 | 1.475806598  |
| O | 8.484079846  | 19.942807979 | 4.441917206  |
| O | 10.956286469 | 19.954255553 | 1.523709617  |
| O | 10.911727221 | 19.894104801 | 4.453331232  |

|   |              |              |              |
|---|--------------|--------------|--------------|
| O | 8.481071250  | 19.931735097 | 7.422148097  |
| O | 8.491871568  | 19.910337289 | 10.366060934 |
| O | 10.944012182 | 19.894058366 | 7.387355233  |
| O | 10.952056016 | 19.941370291 | 10.366374536 |
| O | 2.006310576  | 19.892612462 | 1.501665749  |
| O | 6.450527730  | 21.108048782 | 2.961286733  |
| O | 6.453013397  | 21.106717178 | 5.920870596  |
| O | 0.167223656  | 21.046399976 | 3.106902958  |
| O | -0.073566615 | 21.070753887 | 5.909526838  |
| O | -0.037483728 | 21.099364070 | 8.888101230  |
| O | -0.014951927 | 21.144478563 | 0.071603977  |
| O | 6.451341219  | 21.107910549 | 8.872779414  |
| O | 6.470108866  | 21.115350455 | -0.002706139 |
| H | 0.000000000  | 0.932899949  | 9.814800036  |
| H | 0.816399984  | 0.932899949  | 8.400899982  |
| H | 6.457700016  | 0.932899949  | 6.856699960  |
| H | 0.834099951  | 0.932899949  | -0.439200043 |
| H | 0.000000000  | 0.932899949  | 3.900000036  |
| H | 0.816399984  | 0.932899949  | 2.486099982  |
| H | 6.457700016  | 0.932899949  | 0.941899960  |
| H | 0.834099951  | 0.932899949  | 5.475599957  |
| H | 6.494400000  | 0.932899949  | 9.814800036  |

|   |              |              |              |
|---|--------------|--------------|--------------|
| H | 7.310799984  | 0.932899949  | 8.400899982  |
| H | -0.036699984 | 0.932899949  | 6.856699960  |
| H | 7.328499951  | 0.932899949  | -0.439200043 |
| H | 6.494400000  | 0.932899949  | 3.900000036  |
| H | 7.310799984  | 0.932899949  | 2.486099982  |
| H | -0.036699984 | 0.932899949  | 0.941899960  |
| H | 7.328499951  | 0.932899949  | 5.475599957  |
| H | 1.347603976  | 20.838357312 | 3.767188170  |
| H | 0.595408670  | 21.772747814 | 5.846637490  |

1-b:

|    |             |             |              |
|----|-------------|-------------|--------------|
| Ti | 3.247200000 | 3.247194072 | 1.478700000  |
| Ti | 3.247200000 | 3.247194072 | 4.436100000  |
| Ti | 0.000000000 | 3.247194072 | 2.957400000  |
| Ti | 0.000000000 | 3.247194072 | 0.000000000  |
| Ti | 3.247200000 | 3.247194072 | 7.393500000  |
| Ti | 3.247200000 | 3.247194072 | 10.350900000 |
| Ti | 0.000000000 | 3.247194072 | 8.872200000  |
| Ti | 0.000000000 | 3.247194072 | 5.914800000  |
| Ti | 9.741600000 | 3.247194072 | 1.478700000  |
| Ti | 9.741600000 | 3.247194072 | 4.436100000  |
| Ti | 6.494400000 | 3.247194072 | 2.957400000  |
| Ti | 6.494400000 | 3.247194072 | 0.000000000  |



|    |             |             |              |
|----|-------------|-------------|--------------|
| Ti | 9.741600000 | 3.247194072 | 7.393500000  |
| Ti | 9.741600000 | 3.247194072 | 10.350900000 |
| Ti | 6.494400000 | 3.247194072 | 8.872200000  |
| Ti | 6.494400000 | 3.247194072 | 5.914800000  |
| Ti | 0.000000000 | 6.494391717 | 4.436100000  |
| Ti | 0.000000000 | 6.494391717 | 1.478700000  |
| Ti | 3.247200000 | 6.494391717 | 2.957400000  |
| Ti | 3.247200000 | 6.494391717 | 0.000000000  |
| Ti | 0.000000000 | 6.494391717 | 10.350900000 |
| Ti | 0.000000000 | 6.494391717 | 7.393500000  |
| Ti | 3.247200000 | 6.494391717 | 8.872200000  |
| Ti | 3.247200000 | 6.494391717 | 5.914800000  |
| Ti | 6.494400000 | 6.494391717 | 4.436100000  |
| Ti | 6.494400000 | 6.494391717 | 1.478700000  |
| Ti | 9.741600000 | 6.494391717 | 2.957400000  |
| Ti | 9.741600000 | 6.494391717 | 0.000000000  |
| Ti | 6.494400000 | 6.494391717 | 10.350900000 |
| Ti | 6.494400000 | 6.494391717 | 7.393500000  |
| Ti | 9.741600000 | 6.494391717 | 8.872200000  |
| Ti | 9.741600000 | 6.494391717 | 5.914800000  |
| Ti | 3.247685132 | 9.732042036 | 1.482672616  |
| Ti | 3.248527845 | 9.731909162 | 4.440169737  |

|    |              |              |              |
|----|--------------|--------------|--------------|
| Ti | -0.003292791 | 9.818950943  | 2.957829060  |
| Ti | -0.002977423 | 9.779073924  | -0.003101366 |
| Ti | 3.248382760  | 9.731203712  | 7.397200890  |
| Ti | 3.249023628  | 9.731538041  | 10.354883263 |
| Ti | -0.005728191 | 9.846569926  | 8.872533240  |
| Ti | -0.002870785 | 9.771790110  | 5.917748528  |
| Ti | 9.734261718  | 9.732080613  | 1.479242032  |
| Ti | 9.733644100  | 9.733519016  | 4.436274487  |
| Ti | 6.490920171  | 9.837478375  | 2.957216641  |
| Ti | 6.491594159  | 9.838093456  | 0.000829965  |
| Ti | 9.732906596  | 9.731084768  | 7.393400631  |
| Ti | 9.732048686  | 9.732280282  | 10.351604926 |
| Ti | 6.490042647  | 9.837210840  | 8.871857178  |
| Ti | 6.491355036  | 9.837897716  | 5.914630127  |
| Ti | -0.011543666 | 13.097040142 | 1.456808024  |
| Ti | -0.012758768 | 13.094578748 | 4.500465800  |
| Ti | 3.221754291  | 12.981194580 | 2.959891195  |
| Ti | 3.249339905  | 12.981595704 | 5.917208743  |
| Ti | 6.482567203  | 13.171372756 | 1.505357530  |
| Ti | 6.482634096  | 13.172306807 | 4.461219091  |
| Ti | 9.743430122  | 12.983100187 | 2.959375780  |
| Ti | 9.714778388  | 12.985390845 | 5.916661861  |

|    |              |              |              |
|----|--------------|--------------|--------------|
| Ti | -0.011887090 | 13.167886227 | 7.420992345  |
| Ti | -0.012172324 | 13.185002045 | 10.384395158 |
| Ti | 3.220880795  | 12.979220392 | 8.875674708  |
| Ti | 3.248899325  | 12.981798945 | 0.001817500  |
| Ti | 6.482562657  | 13.170158668 | 7.420650470  |
| Ti | 6.482978429  | 13.172057846 | 10.376037900 |
| Ti | 9.743739645  | 12.982013616 | 8.874118170  |
| Ti | 9.715221306  | 12.985469069 | 0.002127317  |
| Ti | 9.722451911  | 16.298842185 | 1.478712658  |
| Ti | 9.725494148  | 16.296318283 | 4.436774287  |
| Ti | 6.482976610  | 16.626168363 | 2.965890814  |
| Ti | 0.004084978  | 16.569235533 | 5.917972107  |
| Ti | 3.241478174  | 16.294109421 | 1.477482024  |
| Ti | 3.247037900  | 16.286814892 | 4.438876999  |
| Ti | -0.014657341 | 16.340617311 | 2.957224212  |
| Ti | 6.489488935  | 16.622647544 | 5.924479688  |
| Ti | 3.242517538  | 16.284977508 | 7.402600984  |
| Ti | 3.239779109  | 16.299189017 | 10.354026800 |
| Ti | -0.015366400 | 16.542067324 | 8.886662159  |
| Ti | 6.483990256  | 16.628723699 | 0.007007264  |
| Ti | 9.729902027  | 16.293460407 | 7.396260201  |
| Ti | 9.723401262  | 16.301858653 | 10.353094036 |

|    |              |              |              |
|----|--------------|--------------|--------------|
| Ti | 6.483437972  | 16.628210060 | 8.879767987  |
| Ti | -0.006768464 | 16.670719211 | 0.015367715  |
| Ti | 6.527679254  | 19.996993663 | 7.406661258  |
| Ti | 3.340995632  | 19.540307649 | 2.896934656  |
| Ti | 3.232191442  | 19.536997571 | 8.904094376  |
| Ti | 3.223798209  | 19.539367525 | -0.011424200 |
| Ti | 6.525473886  | 19.997580526 | 1.475213462  |
| Ti | 6.503944040  | 19.994967683 | 4.441734320  |
| Ti | 6.501143655  | 19.993264602 | 10.355134879 |
| Ti | 3.338273959  | 19.528098189 | 5.993209546  |
| Ti | 0.011000864  | 20.020471030 | 1.517448328  |
| Ti | -0.142820558 | 19.730745145 | 4.347767430  |
| Ti | 9.713658493  | 19.542199325 | 2.944392763  |
| Ti | 9.713456518  | 19.536315696 | 5.939821970  |
| Ti | 0.020901447  | 19.876478202 | 7.503639373  |
| Ti | -0.004083679 | 20.030087650 | 10.405077675 |
| Ti | 9.764220645  | 19.545527619 | 8.884979044  |
| Ti | 9.758224885  | 19.545222222 | -0.000794121 |
| O  | 0.000000000  | 1.266694833  | 2.957400000  |
| O  | 0.000000000  | 1.266694833  | 0.000000000  |
| O  | 0.000000000  | 1.266694833  | 8.872200000  |
| O  | 0.000000000  | 1.266694833  | 5.914800000  |

|   |             |             |              |
|---|-------------|-------------|--------------|
| O | 6.494400000 | 1.266694833 | 2.957400000  |
| O | 6.494400000 | 1.266694833 | 0.000000000  |
| O | 6.494400000 | 1.266694833 | 8.872200000  |
| O | 6.494400000 | 1.266694833 | 5.914800000  |
| O | 9.741600000 | 1.980495667 | 8.872200000  |
| O | 9.741600000 | 1.980495667 | 5.914800000  |
| O | 9.741600000 | 1.980495667 | 2.957400000  |
| O | 9.741600000 | 1.980495667 | 0.000000000  |
| O | 3.247200000 | 1.980495667 | 8.872200000  |
| O | 3.247200000 | 1.980495667 | 5.914800000  |
| O | 3.247200000 | 1.980495667 | 2.957400000  |
| O | 3.247200000 | 1.980495667 | 0.000000000  |
| O | 1.266698949 | 3.247194072 | 1.478700000  |
| O | 1.266698949 | 3.247194072 | 4.436100000  |
| O | 5.227599738 | 3.247194072 | 1.478700000  |
| O | 5.227599738 | 3.247194072 | 4.436100000  |
| O | 1.266698949 | 3.247194072 | 7.393500000  |
| O | 1.266698949 | 3.247194072 | 10.350900000 |
| O | 5.227599738 | 3.247194072 | 7.393500000  |
| O | 5.227599738 | 3.247194072 | 10.350900000 |
| O | 7.761098949 | 3.247194072 | 1.478700000  |
| O | 7.761098949 | 3.247194072 | 4.436100000  |

|   |              |             |              |
|---|--------------|-------------|--------------|
| O | 11.721999738 | 3.247194072 | 1.478700000  |
| O | 11.721999738 | 3.247194072 | 4.436100000  |
| O | 7.761098949  | 3.247194072 | 7.393500000  |
| O | 7.761098949  | 3.247194072 | 10.350900000 |
| O | 11.721999738 | 3.247194072 | 7.393500000  |
| O | 11.721999738 | 3.247194072 | 10.350900000 |
| O | 9.741600000  | 4.513896049 | 8.872200000  |
| O | 9.741600000  | 4.513896049 | 5.914800000  |
| O | 9.741600000  | 4.513896049 | 2.957400000  |
| O | 9.741600000  | 4.513896049 | 0.000000000  |
| O | 3.247200000  | 4.513896049 | 8.872200000  |
| O | 3.247200000  | 4.513896049 | 5.914800000  |
| O | 3.247200000  | 4.513896049 | 2.957400000  |
| O | 3.247200000  | 4.513896049 | 0.000000000  |
| O | 0.000000000  | 5.227596870 | 2.957400000  |
| O | 0.000000000  | 5.227596870 | 0.000000000  |
| O | 0.000000000  | 5.227596870 | 8.872200000  |
| O | 0.000000000  | 5.227596870 | 5.914800000  |
| O | 6.494400000  | 5.227596870 | 0.000000000  |
| O | 6.494400000  | 5.227596870 | 2.957400000  |
| O | 6.494400000  | 5.227596870 | 8.872200000  |
| O | 6.494400000  | 5.227596870 | 5.914800000  |

|   |              |             |              |
|---|--------------|-------------|--------------|
| O | 8.474899752  | 6.494391717 | 7.393500000  |
| O | 11.008298949 | 6.494391717 | 7.393500000  |
| O | 8.474899752  | 6.494391717 | 10.350900000 |
| O | 11.008298949 | 6.494391717 | 10.350900000 |
| O | 8.474899752  | 6.494391717 | 1.478700000  |
| O | 11.008298949 | 6.494391717 | 1.478700000  |
| O | 8.474899752  | 6.494391717 | 4.436100000  |
| O | 11.008298949 | 6.494391717 | 4.436100000  |
| O | 1.980499752  | 6.494391717 | 1.478700000  |
| O | 4.513898949  | 6.494391717 | 1.478700000  |
| O | 1.980499752  | 6.494391717 | 4.436100000  |
| O | 4.513898949  | 6.494391717 | 4.436100000  |
| O | 1.980499752  | 6.494391717 | 7.393500000  |
| O | 4.513898949  | 6.494391717 | 7.393500000  |
| O | 1.980499752  | 6.494391717 | 10.350900000 |
| O | 4.513898949  | 6.494391717 | 10.350900000 |
| O | 0.000000000  | 7.761086550 | 8.872200000  |
| O | 0.000000000  | 7.761086550 | 5.914800000  |
| O | 6.494400000  | 7.761086550 | 2.957400000  |
| O | 6.494400000  | 7.761086550 | 0.000000000  |
| O | 0.000000000  | 7.761086550 | 2.957400000  |
| O | 0.000000000  | 7.761086550 | 0.000000000  |

|   |              |             |              |
|---|--------------|-------------|--------------|
| O | 6.494400000  | 7.761086550 | 8.872200000  |
| O | 6.494400000  | 7.761086550 | 5.914800000  |
| O | 3.247200000  | 8.474887384 | 2.957400000  |
| O | 3.247200000  | 8.474887384 | 0.000000000  |
| O | 3.247200000  | 8.474887384 | 8.872200000  |
| O | 3.247200000  | 8.474887384 | 5.914800000  |
| O | 9.741600000  | 8.474887384 | 2.957400000  |
| O | 9.741600000  | 8.474887384 | 0.000000000  |
| O | 9.741600000  | 8.474887384 | 8.872200000  |
| O | 9.741600000  | 8.474887384 | 5.914800000  |
| O | 1.272844600  | 9.779788660 | 1.477375085  |
| O | 1.272813037  | 9.779167865 | 4.438202357  |
| O | 5.212254900  | 9.778769598 | 1.478074924  |
| O | 5.212480905  | 9.778746738 | 4.435513843  |
| O | 1.272761472  | 9.779803662 | 7.390917953  |
| O | 1.272481173  | 9.782635820 | 10.352481026 |
| O | 5.212225805  | 9.778979268 | 7.392876107  |
| O | 5.211987980  | 9.778806031 | 10.350235886 |
| O | 7.770425297  | 9.780371237 | 1.478247163  |
| O | 7.770449456  | 9.780265509 | 4.435205564  |
| O | 11.709852223 | 9.777489787 | 1.477100283  |
| O | 11.709692201 | 9.777341553 | 4.438548017  |



|   |              |              |              |
|---|--------------|--------------|--------------|
| O | 7.770333986  | 9.780268723  | 7.393151855  |
| O | 7.770292422  | 9.780643773  | 10.350026621 |
| O | 11.709519450 | 9.778322396  | 7.390290748  |
| O | 11.709779096 | 9.781005249  | 10.353322465 |
| O | 9.741982520  | 11.063644318 | 2.957451340  |
| O | 9.738109000  | 11.065266673 | 0.000722434  |
| O | 3.237944960  | 11.062434159 | 2.957772751  |
| O | 3.240200076  | 11.063372496 | 0.001045500  |
| O | 3.236912870  | 11.061806576 | 8.872382886  |
| O | 3.239927051  | 11.063435004 | 5.914894755  |
| O | 9.742394005  | 11.063823627 | 8.871927209  |
| O | 9.738362801  | 11.065165946 | 5.914680521  |
| O | 6.485866099  | 11.792697868 | 8.870329859  |
| O | -0.009990336 | 11.797764961 | 2.961762165  |
| O | 6.486755052  | 11.792626430 | -0.002204919 |
| O | 6.486188091  | 11.792224948 | 5.912705451  |
| O | -0.009618856 | 11.801765844 | 0.001579961  |
| O | -0.010238551 | 11.802652389 | 5.919380303  |
| O | 6.486345385  | 11.792847173 | 2.954982030  |
| O | -0.009491436 | 11.805473830 | 8.865289739  |
| O | 8.470113639  | 13.097645936 | 1.482343280  |
| O | 8.469812429  | 13.096686882 | 4.434193305  |

|   |              |              |              |
|---|--------------|--------------|--------------|
| O | 10.998706461 | 13.098604633 | 1.480506853  |
| O | 10.999400582 | 13.099616909 | 4.437747390  |
| O | 1.968150391  | 13.094327286 | 1.482055111  |
| O | 1.967742153  | 13.096026081 | 4.437004255  |
| O | 4.496930511  | 13.096228607 | 1.481537211  |
| O | 4.496987272  | 13.095868203 | 4.435790301  |
| O | 1.968362108  | 13.098682858 | 7.393173148  |
| O | 1.968137532  | 13.094272636 | 10.353575856 |
| O | 4.497025848  | 13.095414215 | 7.397407553  |
| O | 4.496782698  | 13.095181327 | 10.351212656 |
| O | 8.470047006  | 13.096149311 | 7.398343985  |
| O | 8.470451737  | 13.096355410 | 10.349696693 |
| O | 10.998524617 | 13.103008426 | 7.392284154  |
| O | 10.998828555 | 13.098131000 | 10.353854916 |
| O | -0.013029585 | 14.422429465 | 2.960006534  |
| O | -0.007955640 | 14.409384182 | 5.913780880  |
| O | -0.012415474 | 14.433918831 | 8.876800650  |
| O | -0.008207493 | 14.396691802 | 0.012297461  |
| O | 6.482235339  | 14.402853682 | 2.963389326  |
| O | 6.484699185  | 14.402221813 | 5.922211126  |
| O | 6.483350038  | 14.403015131 | 8.879451900  |
| O | 6.483276002  | 14.403213372 | 0.006280926  |

|   |              |              |              |
|---|--------------|--------------|--------------|
| O | 9.740919387  | 15.104450771 | 8.878203404  |
| O | 3.234028448  | 15.095716053 | 8.880180012  |
| O | 9.731284815  | 15.100862800 | 5.917184256  |
| O | 9.737647118  | 15.102703756 | 2.958056306  |
| O | 3.236996908  | 15.100481678 | 2.956942786  |
| O | 9.735790499  | 15.103507433 | 0.000523578  |
| O | 3.231412763  | 15.098673584 | 0.003664455  |
| O | 3.237638425  | 15.096956216 | 5.918787876  |
| O | 1.271885637  | 16.461763927 | 10.357811917 |
| O | 5.199695899  | 16.451539728 | 4.442798629  |
| O | 5.197596519  | 16.459097148 | 7.398615237  |
| O | 7.771471415  | 16.452714882 | 1.485747602  |
| O | 7.771513369  | 16.452157666 | 4.440697574  |
| O | 5.197677570  | 16.462008959 | 10.357981317 |
| O | 11.697312056 | 16.461580689 | 1.478873185  |
| O | 11.695074475 | 16.452625227 | 4.444420822  |
| O | 1.280593978  | 16.438291203 | 4.433636604  |
| O | 1.274745251  | 16.460247299 | 1.485360538  |
| O | 5.195661058  | 16.464583226 | 1.483868589  |
| O | 7.773326995  | 16.453001348 | 7.400592437  |
| O | 7.773915388  | 16.456440014 | 10.355754513 |
| O | 1.278767882  | 16.446959841 | 7.397801952  |

|   |              |              |              |
|---|--------------|--------------|--------------|
| O | 11.699525477 | 16.459741161 | 7.388447933  |
| O | 11.700058278 | 16.471822390 | 10.361237651 |
| O | 3.230171553  | 17.714171528 | 8.876585351  |
| O | 3.223975116  | 17.717677702 | 0.005100450  |
| O | 9.733373933  | 17.722437613 | 2.961920327  |
| O | 9.732673577  | 17.718448161 | 5.919533141  |
| O | 3.231925041  | 17.732431782 | 2.973095395  |
| O | 3.232455634  | 17.721750023 | 5.911003053  |
| O | 9.747426776  | 17.722818377 | 8.872371293  |
| O | 9.743269970  | 17.722102569 | 0.006595239  |
| O | 6.505934574  | 18.500095043 | 0.007698940  |
| O | 6.487801430  | 18.499529254 | 5.919509127  |
| O | 0.007280093  | 18.539708099 | 0.001998019  |
| O | 6.482588894  | 18.500235775 | 2.969779676  |
| O | 0.039278911  | 18.495806980 | 5.897623303  |
| O | 6.502748032  | 18.500258993 | 8.874993087  |
| O | -0.000255620 | 18.498914173 | 8.860336686  |
| O | -0.010403120 | 18.491149225 | 2.970053177  |
| O | 2.002382763  | 20.134719598 | 4.457693515  |
| O | 4.494180652  | 19.905790978 | 1.459232855  |
| O | 4.440923584  | 19.945544410 | 4.446477162  |
| O | 2.026239162  | 19.919059148 | 7.381755810  |

|   |              |              |              |
|---|--------------|--------------|--------------|
| O | 2.006115744  | 19.942666532 | 10.358400085 |
| O | 4.492430021  | 19.910776989 | 7.428296059  |
| O | 4.475347022  | 19.904401510 | 10.359379930 |
| O | 8.518128427  | 19.932959187 | 1.478850946  |
| O | 8.509860666  | 19.931893690 | 4.442586170  |
| O | 10.972088772 | 19.928417519 | 1.494887151  |
| O | 10.939291403 | 19.956480845 | 4.453295388  |
| O | 8.525788572  | 19.942134319 | 7.410691958  |
| O | 8.526533739  | 19.920749370 | 10.351068690 |
| O | 10.987492190 | 19.929826633 | 7.375336004  |
| O | 10.984450863 | 19.937555147 | 10.359733517 |
| O | 2.032121789  | 19.938987478 | 1.506577399  |
| O | 6.480695907  | 21.104345796 | 2.962090910  |
| O | 6.483767888  | 21.104682626 | 5.923966166  |
| O | 0.001360837  | 21.075087670 | 3.027414197  |
| O | 0.049860886  | 21.137516935 | 5.908701723  |
| O | 0.003359683  | 21.099826988 | 8.861403361  |
| O | 0.006890688  | 21.146112349 | 0.030173051  |
| O | 6.496424694  | 21.110229425 | 8.879770589  |
| O | 6.498281573  | 21.109963319 | 0.003332872  |
| H | 0.000000000  | 0.932897449  | 9.814799089  |
| H | 0.816399334  | 0.932897449  | 8.400899272  |

|   |              |              |              |
|---|--------------|--------------|--------------|
| H | 6.457698847  | 0.932897449  | 6.856699960  |
| H | 0.834099172  | 0.932897449  | -0.439201108 |
| H | 0.000000000  | 0.932897449  | 3.899999089  |
| H | 0.816399334  | 0.932897449  | 2.486099272  |
| H | 6.457698847  | 0.932897449  | 0.941899960  |
| H | 0.834099172  | 0.932897449  | 5.475598892  |
| H | 6.494400000  | 0.932897449  | 9.814799089  |
| H | 7.310799334  | 0.932897449  | 8.400899272  |
| H | -0.036701153 | 0.932897449  | 6.856699960  |
| H | 7.328499172  | 0.932897449  | -0.439201108 |
| H | 6.494400000  | 0.932897449  | 3.899999089  |
| H | 7.310799334  | 0.932897449  | 2.486099272  |
| H | -0.036701153 | 0.932897449  | 0.941899960  |
| H | 7.328499172  | 0.932897449  | 5.475598892  |
| H | 1.850439391  | 21.104610116 | 4.490985322  |
| H | -0.549962937 | 21.905161980 | 5.911972962  |

TS1-2:

|    |             |             |             |
|----|-------------|-------------|-------------|
| Ti | 3.247200000 | 3.247190143 | 1.478700000 |
| Ti | 3.247200000 | 3.247190143 | 4.436100000 |
| Ti | 0.000000000 | 3.247190143 | 2.957400000 |
| Ti | 0.000000000 | 3.247190143 | 0.000000000 |
| Ti | 3.247200000 | 3.247190143 | 7.393500000 |

|    |             |             |              |
|----|-------------|-------------|--------------|
| Ti | 3.247200000 | 3.247190143 | 10.350900000 |
| Ti | 0.000000000 | 3.247190143 | 8.872200000  |
| Ti | 0.000000000 | 3.247190143 | 5.914800000  |
| Ti | 9.741600000 | 3.247190143 | 1.478700000  |
| Ti | 9.741600000 | 3.247190143 | 4.436100000  |
| Ti | 6.494400000 | 3.247190143 | 2.957400000  |
| Ti | 6.494400000 | 3.247190143 | 0.000000000  |
| Ti | 9.741600000 | 3.247190143 | 7.393500000  |
| Ti | 9.741600000 | 3.247190143 | 10.350900000 |
| Ti | 6.494400000 | 3.247190143 | 8.872200000  |
| Ti | 6.494400000 | 3.247190143 | 5.914800000  |
| Ti | 0.000000000 | 6.494389931 | 4.436100000  |
| Ti | 0.000000000 | 6.494389931 | 1.478700000  |
| Ti | 3.247200000 | 6.494389931 | 2.957400000  |
| Ti | 3.247200000 | 6.494389931 | 0.000000000  |
| Ti | 0.000000000 | 6.494389931 | 10.350900000 |
| Ti | 0.000000000 | 6.494389931 | 7.393500000  |
| Ti | 3.247200000 | 6.494389931 | 8.872200000  |
| Ti | 3.247200000 | 6.494389931 | 5.914800000  |
| Ti | 6.494400000 | 6.494389931 | 4.436100000  |
| Ti | 6.494400000 | 6.494389931 | 1.478700000  |
| Ti | 9.741600000 | 6.494389931 | 2.957400000  |

|    |              |              |              |
|----|--------------|--------------|--------------|
| Ti | 9.741600000  | 6.494389931  | 0.000000000  |
| Ti | 6.494400000  | 6.494389931  | 10.350900000 |
| Ti | 6.494400000  | 6.494389931  | 7.393500000  |
| Ti | 9.741600000  | 6.494389931  | 8.872200000  |
| Ti | 9.741600000  | 6.494389931  | 5.914800000  |
| Ti | 3.242236590  | 9.723637719  | 1.481673133  |
| Ti | 3.238211361  | 9.731449101  | 4.438622780  |
| Ti | -0.014150778 | 9.831671185  | 2.966282373  |
| Ti | -0.005319433 | 9.801119317  | 0.009024802  |
| Ti | 3.236894167  | 9.734685597  | 7.393900787  |
| Ti | 3.242830178  | 9.726341288  | 10.346913070 |
| Ti | -0.013909966 | 9.820972995  | 8.880520349  |
| Ti | -0.013452500 | 9.798086776  | 5.922543183  |
| Ti | 9.730919310  | 9.726146619  | 1.480761190  |
| Ti | 9.723570636  | 9.725723707  | 4.438557245  |
| Ti | 6.483939989  | 9.835329879  | 2.963126946  |
| Ti | 6.486237578  | 9.835587770  | 0.005790234  |
| Ti | 9.724530898  | 9.726018746  | 7.396025265  |
| Ti | 9.731430939  | 9.726333430  | 10.353489973 |
| Ti | 6.484554619  | 9.836252500  | 8.878725444  |
| Ti | 6.477235820  | 9.834905895  | 5.921752966  |
| Ti | -0.024756523 | 13.160551693 | 1.510684991  |



|    |              |              |              |
|----|--------------|--------------|--------------|
| Ti | -0.026512609 | 13.154216933 | 4.475409997  |
| Ti | 3.220778573  | 12.985349054 | 2.970150061  |
| Ti | 3.222845351  | 12.988245862 | 5.925815250  |
| Ti | 6.467067278  | 13.168900289 | 1.505059070  |
| Ti | 6.469013910  | 13.170097232 | 4.462742980  |
| Ti | 9.714728771  | 12.974079717 | 2.964508643  |
| Ti | 9.711673155  | 12.974447266 | 5.922446772  |
| Ti | -0.028768244 | 13.126025733 | 7.412270145  |
| Ti | -0.027479495 | 13.134916185 | 10.406041906 |
| Ti | 3.218767257  | 12.992633938 | 8.880075320  |
| Ti | 3.219381108  | 12.968486840 | 0.010051138  |
| Ti | 6.468408502  | 13.170673021 | 7.418430645  |
| Ti | 6.466547597  | 13.168780987 | 10.375760851 |
| Ti | 9.712720442  | 12.974896610 | 8.880679102  |
| Ti | 9.712024243  | 12.975159145 | 0.007915659  |
| Ti | 9.681826322  | 16.290029957 | 1.495858007  |
| Ti | 9.673537909  | 16.290312494 | 4.454564823  |
| Ti | 6.429378067  | 16.630166031 | 2.975140969  |
| Ti | -0.063843069 | 16.578270291 | 5.926461028  |
| Ti | 3.189842888  | 16.256901323 | 1.504938881  |
| Ti | 3.187269287  | 16.331994751 | 4.476550134  |
| Ti | -0.062684728 | 16.535276433 | 2.967703463  |

|    |              |              |              |
|----|--------------|--------------|--------------|
| Ti | 6.431990505  | 16.640308076 | 5.929898118  |
| Ti | 3.186522561  | 16.342740090 | 7.368567344  |
| Ti | 3.207002911  | 16.260316414 | 10.349560180 |
| Ti | -0.058290227 | 16.443274357 | 8.892102356  |
| Ti | 6.435497091  | 16.624469926 | 0.022050138  |
| Ti | 9.673855355  | 16.293149295 | 7.411567821  |
| Ti | 9.667076111  | 16.291771972 | 10.369387772 |
| Ti | 6.433510714  | 16.632854241 | 8.885218238  |
| Ti | -0.055350213 | 16.611207471 | 0.011169390  |
| Ti | 3.182035710  | 19.501083572 | 0.036819039  |
| Ti | 3.152005474  | 19.524205535 | 8.931420870  |
| Ti | 3.194901636  | 19.516507739 | 2.953103726  |
| Ti | 6.420078606  | 19.996043181 | 1.492294931  |
| Ti | 6.461379613  | 20.011670589 | 7.424477582  |
| Ti | 6.391659761  | 20.011491637 | 4.449249902  |
| Ti | 6.409240102  | 19.995254863 | 10.369900822 |
| Ti | 3.303345257  | 19.633530599 | 6.041909170  |
| Ti | -0.069443580 | 19.982368886 | 1.473056453  |
| Ti | -0.089329693 | 19.846553560 | 4.358387809  |
| Ti | 9.654663104  | 19.535747764 | 2.974422321  |
| Ti | 9.673192277  | 19.537128303 | 5.921504308  |
| Ti | -0.084922333 | 19.797251017 | 7.516895267  |

|    |              |              |              |
|----|--------------|--------------|--------------|
| Ti | -0.072854569 | 19.968974628 | 10.384017912 |
| Ti | 9.674051875  | 19.536780400 | 8.896268741  |
| Ti | 9.673425685  | 19.531799032 | 0.019534692  |
| O  | 0.000000000  | 1.266689833  | 2.957400000  |
| O  | 0.000000000  | 1.266689833  | 0.000000000  |
| O  | 0.000000000  | 1.266689833  | 8.872200000  |
| O  | 0.000000000  | 1.266689833  | 5.914800000  |
| O  | 6.494400000  | 1.266689833  | 2.957400000  |
| O  | 6.494400000  | 1.266689833  | 0.000000000  |
| O  | 6.494400000  | 1.266689833  | 8.872200000  |
| O  | 6.494400000  | 1.266689833  | 5.914800000  |
| O  | 9.741600000  | 1.980499953  | 8.872200000  |
| O  | 9.741600000  | 1.980499953  | 5.914800000  |
| O  | 9.741600000  | 1.980499953  | 2.957400000  |
| O  | 9.741600000  | 1.980499953  | 0.000000000  |
| O  | 3.247200000  | 1.980499953  | 8.872200000  |
| O  | 3.247200000  | 1.980499953  | 5.914800000  |
| O  | 3.247200000  | 1.980499953  | 2.957400000  |
| O  | 3.247200000  | 1.980499953  | 0.000000000  |
| O  | 1.266699988  | 3.247190143  | 1.478700000  |
| O  | 1.266699988  | 3.247190143  | 4.436100000  |
| O  | 5.227599998  | 3.247190143  | 1.478700000  |

|   |              |             |              |
|---|--------------|-------------|--------------|
| O | 5.227599998  | 3.247190143 | 4.436100000  |
| O | 1.266699988  | 3.247190143 | 7.393500000  |
| O | 1.266699988  | 3.247190143 | 10.350900000 |
| O | 5.227599998  | 3.247190143 | 7.393500000  |
| O | 5.227599998  | 3.247190143 | 10.350900000 |
| O | 7.761099988  | 3.247190143 | 1.478700000  |
| O | 7.761099988  | 3.247190143 | 4.436100000  |
| O | 11.721999998 | 3.247190143 | 1.478700000  |
| O | 11.721999998 | 3.247190143 | 4.436100000  |
| O | 7.761099988  | 3.247190143 | 7.393500000  |
| O | 7.761099988  | 3.247190143 | 10.350900000 |
| O | 11.721999998 | 3.247190143 | 7.393500000  |
| O | 11.721999998 | 3.247190143 | 10.350900000 |
| O | 9.741600000  | 4.513899978 | 8.872200000  |
| O | 9.741600000  | 4.513899978 | 5.914800000  |
| O | 9.741600000  | 4.513899978 | 2.957400000  |
| O | 9.741600000  | 4.513899978 | 0.000000000  |
| O | 3.247200000  | 4.513899978 | 8.872200000  |
| O | 3.247200000  | 4.513899978 | 5.914800000  |
| O | 3.247200000  | 4.513899978 | 2.957400000  |
| O | 3.247200000  | 4.513899978 | 0.000000000  |
| O | 0.000000000  | 5.227600085 | 2.957400000  |

|   |              |             |              |
|---|--------------|-------------|--------------|
| O | 0.000000000  | 5.227600085 | 0.000000000  |
| O | 0.000000000  | 5.227600085 | 8.872200000  |
| O | 0.000000000  | 5.227600085 | 5.914800000  |
| O | 6.494400000  | 5.227600085 | 0.000000000  |
| O | 6.494400000  | 5.227600085 | 2.957400000  |
| O | 6.494400000  | 5.227600085 | 8.872200000  |
| O | 6.494400000  | 5.227600085 | 5.914800000  |
| O | 8.474900012  | 6.494389931 | 7.393500000  |
| O | 11.008299988 | 6.494389931 | 7.393500000  |
| O | 8.474900012  | 6.494389931 | 10.350900000 |
| O | 11.008299988 | 6.494389931 | 10.350900000 |
| O | 8.474900012  | 6.494389931 | 1.478700000  |
| O | 11.008299988 | 6.494389931 | 1.478700000  |
| O | 8.474900012  | 6.494389931 | 4.436100000  |
| O | 11.008299988 | 6.494389931 | 4.436100000  |
| O | 1.980500012  | 6.494389931 | 1.478700000  |
| O | 4.513899988  | 6.494389931 | 1.478700000  |
| O | 1.980500012  | 6.494389931 | 4.436100000  |
| O | 4.513899988  | 6.494389931 | 4.436100000  |
| O | 1.980500012  | 6.494389931 | 7.393500000  |
| O | 4.513899988  | 6.494389931 | 7.393500000  |
| O | 1.980500012  | 6.494389931 | 10.350900000 |

|   |             |             |              |
|---|-------------|-------------|--------------|
| O | 4.513899988 | 6.494389931 | 10.350900000 |
| O | 0.000000000 | 7.761090122 | 8.872200000  |
| O | 0.000000000 | 7.761090122 | 5.914800000  |
| O | 6.494400000 | 7.761090122 | 2.957400000  |
| O | 6.494400000 | 7.761090122 | 0.000000000  |
| O | 0.000000000 | 7.761090122 | 2.957400000  |
| O | 0.000000000 | 7.761090122 | 0.000000000  |
| O | 6.494400000 | 7.761090122 | 8.872200000  |
| O | 6.494400000 | 7.761090122 | 5.914800000  |
| O | 3.247200000 | 8.474889884 | 2.957400000  |
| O | 3.247200000 | 8.474889884 | 0.000000000  |
| O | 3.247200000 | 8.474889884 | 8.872200000  |
| O | 3.247200000 | 8.474889884 | 5.914800000  |
| O | 9.741600000 | 8.474889884 | 2.957400000  |
| O | 9.741600000 | 8.474889884 | 0.000000000  |
| O | 9.741600000 | 8.474889884 | 8.872200000  |
| O | 9.741600000 | 8.474889884 | 5.914800000  |
| O | 1.270867964 | 9.780426958 | 1.481846674  |
| O | 1.269739238 | 9.781455665 | 4.442219334  |
| O | 5.207392283 | 9.771278615 | 1.481904639  |
| O | 5.206270180 | 9.771487928 | 4.439036935  |
| O | 1.269925107 | 9.779744369 | 7.396410436  |

|   |              |              |              |
|---|--------------|--------------|--------------|
| O | 1.270852767  | 9.779682218  | 10.354275931 |
| O | 5.206278883  | 9.771673667  | 7.398231722  |
| O | 5.207548538  | 9.771258969  | 10.354987245 |
| O | 7.769315794  | 9.780651631  | 1.482512207  |
| O | 7.767738044  | 9.780265151  | 4.440493040  |
| O | 11.702921009 | 9.771047870  | 1.480809099  |
| O | 11.701821118 | 9.771581154  | 4.442260264  |
| O | 7.767611144  | 9.779760442  | 7.396179759  |
| O | 7.769316703  | 9.780492324  | 10.354275340 |
| O | 11.701818780 | 9.769710195  | 7.396885513  |
| O | 11.702901916 | 9.770188114  | 10.355718433 |
| O | 9.737617634  | 11.059575926 | 2.960862287  |
| O | 9.737813115  | 11.059938831 | 0.002798883  |
| O | 3.237344748  | 11.059634148 | 2.960386146  |
| O | 3.236925859  | 11.056383722 | 0.002329721  |
| O | 3.237170049  | 11.061533683 | 8.874955942  |
| O | 3.237900279  | 11.061916948 | 5.918192374  |
| O | 9.737530869  | 11.059703086 | 8.874922937  |
| O | 9.737096263  | 11.060157431 | 5.918332910  |
| O | 6.469238097  | 11.786921752 | 8.877873949  |
| O | -0.028839812 | 11.790858340 | 2.963173555  |
| O | 6.468775436  | 11.786966401 | 0.005420204  |

|   |              |              |              |
|---|--------------|--------------|--------------|
| O | 6.468942342  | 11.786688865 | 5.920194652  |
| O | -0.029655509 | 11.790541870 | 0.002481377  |
| O | -0.030850089 | 11.792997907 | 5.924925073  |
| O | 6.469184583  | 11.786957829 | 2.962581956  |
| O | -0.029553417 | 11.791436988 | 8.875365838  |
| O | 8.453262230  | 13.080815156 | 1.486775122  |
| O | 8.453443164  | 13.081307006 | 4.444616957  |
| O | 10.976675248 | 13.105351233 | 1.486599334  |
| O | 10.976744868 | 13.105955598 | 4.444382021  |
| O | 1.954124695  | 13.079583923 | 1.487443967  |
| O | 1.953931162  | 13.080102919 | 4.446215609  |
| O | 4.480301729  | 13.099833723 | 1.486371850  |
| O | 4.481358368  | 13.097996697 | 4.445567820  |
| O | 1.953237949  | 13.082475016 | 7.401743102  |
| O | 1.953587218  | 13.081334152 | 10.355887123 |
| O | 4.481533587  | 13.098870740 | 7.401033799  |
| O | 4.480395119  | 13.100802422 | 10.358584153 |
| O | 8.452973489  | 13.080722643 | 7.401624451  |
| O | 8.452772942  | 13.080343665 | 10.359002566 |
| O | 10.976734736 | 13.107270771 | 7.402644754  |
| O | 10.976957364 | 13.106529245 | 10.356573713 |
| O | -0.031448223 | 14.402491849 | 2.970096118  |



|   |              |              |              |
|---|--------------|--------------|--------------|
| O | -0.027575872 | 14.393421729 | 5.930752452  |
| O | -0.029968539 | 14.412747838 | 8.883349280  |
| O | -0.025107350 | 14.391636138 | 0.010247746  |
| O | 6.470292527  | 14.395761322 | 2.971283455  |
| O | 6.469266023  | 14.396706089 | 5.928084049  |
| O | 6.470032232  | 14.396254244 | 8.884337051  |
| O | 6.470908976  | 14.395307334 | 0.012933538  |
| O | 9.675770164  | 15.102942359 | 8.887538614  |
| O | 3.191154627  | 15.102413361 | 8.869758725  |
| O | 9.672538031  | 15.102575168 | 5.932044363  |
| O | 9.675849006  | 15.102035097 | 2.973730645  |
| O | 3.189458809  | 15.094502679 | 2.981784118  |
| O | 9.674608835  | 15.100667417 | 0.013809757  |
| O | 3.190731322  | 15.083431941 | 0.008759937  |
| O | 3.200050786  | 15.101376439 | 5.930037589  |
| O | 1.226731113  | 16.440980842 | 10.363428138 |
| O | 5.160684428  | 16.438688755 | 4.454589665  |
| O | 5.158152002  | 16.449596973 | 7.408689443  |
| O | 7.725508988  | 16.462781918 | 1.496992465  |
| O | 7.724204393  | 16.469791766 | 4.453244166  |
| O | 5.157895473  | 16.431814282 | 10.365046191 |
| O | 11.643418667 | 16.413529382 | 1.478422714  |

|   |              |              |              |
|---|--------------|--------------|--------------|
| O | 11.639650227 | 16.411519832 | 4.452148627  |
| O | 1.216949767  | 16.429316811 | 4.442226077  |
| O | 1.225461328  | 16.442846801 | 1.485827807  |
| O | 5.156503853  | 16.427421919 | 1.494079900  |
| O | 7.724022549  | 16.465002924 | 7.405926403  |
| O | 7.725201283  | 16.457128319 | 10.365883253 |
| O | 1.219659360  | 16.438170473 | 7.409206042  |
| O | 11.641864168 | 16.414320200 | 7.407650331  |
| O | 11.645562469 | 16.422609145 | 10.364888265 |
| O | 3.186107179  | 17.699124910 | 8.897590344  |
| O | 3.192066051  | 17.678887254 | 0.018930317  |
| O | 9.693896424  | 17.710309592 | 2.974380563  |
| O | 9.689847685  | 17.711514751 | 5.931432181  |
| O | 3.195618877  | 17.687711269 | 2.970691029  |
| O | 3.165626959  | 17.713064240 | 5.913486086  |
| O | 9.693355440  | 17.712720980 | 8.887507148  |
| O | 9.694867337  | 17.706869141 | 0.014956873  |
| O | 6.426807454  | 18.486044270 | 0.017767468  |
| O | 6.392656002  | 18.507613172 | 5.937193669  |
| O | -0.084980783 | 18.487924516 | 0.005583808  |
| O | 6.403624524  | 18.495494796 | 2.979692999  |
| O | -0.091942260 | 18.459692597 | 5.916082684  |

|   |              |              |              |
|---|--------------|--------------|--------------|
| O | 6.436002875  | 18.494148905 | 8.890697591  |
| O | -0.077301674 | 18.452023018 | 8.878387827  |
| O | -0.099319898 | 18.446990929 | 2.957864785  |
| O | 1.892596879  | 19.949135238 | 4.334924743  |
| O | 4.409680715  | 19.914656784 | 1.470968410  |
| O | 4.379278480  | 19.999955123 | 4.432023875  |
| O | 1.951756966  | 19.855589746 | 7.426482226  |
| O | 1.942587653  | 19.893700105 | 10.385393931 |
| O | 4.436981484  | 19.960531734 | 7.519671674  |
| O | 4.406136720  | 19.902016554 | 10.378949756 |
| O | 8.441684923  | 19.886405219 | 1.494040862  |
| O | 8.435723453  | 19.896052557 | 4.452662386  |
| O | 10.887846663 | 19.908668141 | 1.493588971  |
| O | 10.891771099 | 19.910613039 | 4.459780138  |
| O | 8.462020837  | 19.916752774 | 7.414472816  |
| O | 8.451275852  | 19.888608722 | 10.364732824 |
| O | 10.913416285 | 19.906552149 | 7.394641556  |
| O | 10.899178741 | 19.914530339 | 10.365797607 |
| O | 1.935465244  | 19.886495945 | 1.474145959  |
| O | 6.443310893  | 21.110701630 | 2.965454775  |
| O | 6.428749409  | 21.110729491 | 5.938453758  |
| O | -0.111286740 | 21.063409351 | 2.970893078  |

|   |              |              |              |
|---|--------------|--------------|--------------|
| O | -0.002790903 | 21.104877651 | 5.927415914  |
| O | -0.057099934 | 21.045738103 | 8.866109176  |
| O | -0.076295172 | 21.105195907 | 0.008657020  |
| O | 6.462576920  | 21.117029603 | 8.903974542  |
| O | 6.440987587  | 21.105457727 | 0.016665777  |
| H | 0.000000000  | 0.932899949  | 9.814800036  |
| H | 0.816399984  | 0.932899949  | 8.400899982  |
| H | 6.457700016  | 0.932899949  | 6.856699960  |
| H | 0.834099951  | 0.932899949  | -0.439200043 |
| H | 0.000000000  | 0.932899949  | 3.900000036  |
| H | 0.816399984  | 0.932899949  | 2.486099982  |
| H | 6.457700016  | 0.932899949  | 0.941899960  |
| H | 0.834099951  | 0.932899949  | 5.475599957  |
| H | 6.494400000  | 0.932899949  | 9.814800036  |
| H | 7.310799984  | 0.932899949  | 8.400899982  |
| H | -0.036699984 | 0.932899949  | 6.856699960  |
| H | 7.328499951  | 0.932899949  | -0.439200043 |
| H | 6.494400000  | 0.932899949  | 3.900000036  |
| H | 7.310799984  | 0.932899949  | 2.486099982  |
| H | -0.036699984 | 0.932899949  | 0.941899960  |
| H | 7.328499951  | 0.932899949  | 5.475599957  |
| H | 2.373875302  | 20.884870917 | 5.130396850  |

|   |             |              |             |
|---|-------------|--------------|-------------|
| H | 0.791493440 | 21.679983495 | 5.957808522 |
|---|-------------|--------------|-------------|

l-c:

|    |             |             |              |
|----|-------------|-------------|--------------|
| Ti | 3.247200000 | 3.247194072 | 1.478700000  |
| Ti | 3.247200000 | 3.247194072 | 4.436100000  |
| Ti | 0.000000000 | 3.247194072 | 2.957400000  |
| Ti | 0.000000000 | 3.247194072 | 0.000000000  |
| Ti | 3.247200000 | 3.247194072 | 7.393500000  |
| Ti | 3.247200000 | 3.247194072 | 10.350900000 |
| Ti | 0.000000000 | 3.247194072 | 8.872200000  |
| Ti | 0.000000000 | 3.247194072 | 5.914800000  |
| Ti | 9.741600000 | 3.247194072 | 1.478700000  |
| Ti | 9.741600000 | 3.247194072 | 4.436100000  |
| Ti | 6.494400000 | 3.247194072 | 2.957400000  |
| Ti | 6.494400000 | 3.247194072 | 0.000000000  |
| Ti | 9.741600000 | 3.247194072 | 7.393500000  |
| Ti | 9.741600000 | 3.247194072 | 10.350900000 |
| Ti | 6.494400000 | 3.247194072 | 8.872200000  |
| Ti | 6.494400000 | 3.247194072 | 5.914800000  |
| Ti | 0.000000000 | 6.494391717 | 4.436100000  |
| Ti | 0.000000000 | 6.494391717 | 1.478700000  |
| Ti | 3.247200000 | 6.494391717 | 2.957400000  |
| Ti | 3.247200000 | 6.494391717 | 0.000000000  |

|    |              |             |              |
|----|--------------|-------------|--------------|
| Ti | 0.000000000  | 6.494391717 | 10.350900000 |
| Ti | 0.000000000  | 6.494391717 | 7.393500000  |
| Ti | 3.247200000  | 6.494391717 | 8.872200000  |
| Ti | 3.247200000  | 6.494391717 | 5.914800000  |
| Ti | 6.494400000  | 6.494391717 | 4.436100000  |
| Ti | 6.494400000  | 6.494391717 | 1.478700000  |
| Ti | 9.741600000  | 6.494391717 | 2.957400000  |
| Ti | 9.741600000  | 6.494391717 | 0.000000000  |
| Ti | 6.494400000  | 6.494391717 | 10.350900000 |
| Ti | 6.494400000  | 6.494391717 | 7.393500000  |
| Ti | 9.741600000  | 6.494391717 | 8.872200000  |
| Ti | 9.741600000  | 6.494391717 | 5.914800000  |
| Ti | 3.242957208  | 9.727913637 | 1.484768821  |
| Ti | 3.237888329  | 9.738023178 | 4.436618728  |
| Ti | -0.014224814 | 9.831114326 | 2.965981665  |
| Ti | -0.005755467 | 9.800094897 | 0.008412502  |
| Ti | 3.240419976  | 9.740657810 | 7.391900283  |
| Ti | 3.243152300  | 9.726540600 | 10.344030433 |
| Ti | -0.013888794 | 9.825634678 | 8.881082610  |
| Ti | -0.009984750 | 9.798883667 | 5.924534105  |
| Ti | 9.729758111  | 9.725019686 | 1.478248819  |
| Ti | 9.726434277  | 9.725498320 | 4.436146609  |

|    |              |              |              |
|----|--------------|--------------|--------------|
| Ti | 6.483240283  | 9.835500259  | 2.963266772  |
| Ti | 6.485858175  | 9.837048676  | 0.006062552  |
| Ti | 9.725401408  | 9.724742149  | 7.393332020  |
| Ti | 9.729082174  | 9.725482961  | 10.350179341 |
| Ti | 6.484051953  | 9.837251917  | 8.877817640  |
| Ti | 6.479901642  | 9.836177133  | 5.919550886  |
| Ti | -0.025292571 | 13.145345411 | 1.502363932  |
| Ti | -0.024415827 | 13.142830796 | 4.486390350  |
| Ti | 3.220014442  | 13.004041507 | 2.971243235  |
| Ti | 3.224390628  | 12.997531367 | 5.925746284  |
| Ti | 6.468110019  | 13.167662984 | 1.508312683  |
| Ti | 6.469542684  | 13.168981728 | 4.464919272  |
| Ti | 9.716960117  | 12.973436776 | 2.965362149  |
| Ti | 9.712674202  | 12.973209246 | 5.923245743  |
| Ti | -0.026289981 | 13.138108747 | 7.422623411  |
| Ti | -0.023862764 | 13.144167400 | 10.402134707 |
| Ti | 3.217799591  | 13.004003645 | 8.879705881  |
| Ti | 3.223445823  | 12.963816585 | 0.012263391  |
| Ti | 6.468770890  | 13.169537872 | 7.421073970  |
| Ti | 6.464152592  | 13.168533812 | 10.379196285 |
| Ti | 9.714925161  | 12.973106375 | 8.881918844  |
| Ti | 9.711347526  | 12.972422714 | 0.007493697  |

|    |              |              |              |
|----|--------------|--------------|--------------|
| Ti | 9.671475937  | 16.293808667 | 1.498213398  |
| Ti | 9.675024996  | 16.292664232 | 4.455836268  |
| Ti | 6.431460432  | 16.626288022 | 2.984963441  |
| Ti | -0.067817512 | 16.581299974 | 5.935067062  |
| Ti | 3.199166378  | 16.242831619 | 1.526707001  |
| Ti | 3.191699637  | 16.376994229 | 4.526492694  |
| Ti | -0.053184980 | 16.473180068 | 2.971404945  |
| Ti | 6.433326533  | 16.634630545 | 5.939405923  |
| Ti | 3.190219303  | 16.378503713 | 7.349202998  |
| Ti | 3.198841009  | 16.238606065 | 10.347478288 |
| Ti | -0.057736385 | 16.472313883 | 8.896410104  |
| Ti | 6.430380932  | 16.625858323 | 0.025108089  |
| Ti | 9.673169936  | 16.291642312 | 7.413783624  |
| Ti | 9.668004030  | 16.292714595 | 10.371299909 |
| Ti | 6.428668229  | 16.626187652 | 8.893780148  |
| Ti | -0.058303086 | 16.609299363 | 0.018932802  |
| Ti | 3.182188328  | 19.495867173 | 0.024713809  |
| Ti | 3.179247794  | 19.508275230 | 8.892462567  |
| Ti | 3.177881372  | 19.510899860 | 2.987433343  |
| Ti | 6.408187230  | 19.993309608 | 1.493327774  |
| Ti | 6.419107693  | 19.999031788 | 7.412232053  |
| Ti | 6.420186153  | 19.998929274 | 4.448723721  |



|    |              |              |              |
|----|--------------|--------------|--------------|
| Ti | 6.407128642  | 19.994161148 | 10.367449019 |
| Ti | 3.156755089  | 19.942358992 | 5.940435216  |
| Ti | -0.056760536 | 19.970719857 | 1.483498204  |
| Ti | -0.092745877 | 19.813013086 | 4.356460057  |
| Ti | 9.667715679  | 19.541723191 | 2.976964621  |
| Ti | 9.667970389  | 19.540121196 | 5.941881503  |
| Ti | -0.091978629 | 19.817083263 | 7.519033586  |
| Ti | -0.058456614 | 19.964362237 | 10.390050771 |
| Ti | 9.664676040  | 19.539622201 | 8.904664799  |
| Ti | 9.675401152  | 19.537364762 | 0.025224019  |
| O  | 0.000000000  | 1.266694833  | 2.957400000  |
| O  | 0.000000000  | 1.266694833  | 0.000000000  |
| O  | 0.000000000  | 1.266694833  | 8.872200000  |
| O  | 0.000000000  | 1.266694833  | 5.914800000  |
| O  | 6.494400000  | 1.266694833  | 2.957400000  |
| O  | 6.494400000  | 1.266694833  | 0.000000000  |
| O  | 6.494400000  | 1.266694833  | 8.872200000  |
| O  | 6.494400000  | 1.266694833  | 5.914800000  |
| O  | 9.741600000  | 1.980495667  | 8.872200000  |
| O  | 9.741600000  | 1.980495667  | 5.914800000  |
| O  | 9.741600000  | 1.980495667  | 2.957400000  |
| O  | 9.741600000  | 1.980495667  | 0.000000000  |

|   |              |             |              |
|---|--------------|-------------|--------------|
| O | 3.247200000  | 1.980495667 | 8.872200000  |
| O | 3.247200000  | 1.980495667 | 5.914800000  |
| O | 3.247200000  | 1.980495667 | 2.957400000  |
| O | 3.247200000  | 1.980495667 | 0.000000000  |
| O | 1.266698949  | 3.247194072 | 1.478700000  |
| O | 1.266698949  | 3.247194072 | 4.436100000  |
| O | 5.227599738  | 3.247194072 | 1.478700000  |
| O | 5.227599738  | 3.247194072 | 4.436100000  |
| O | 1.266698949  | 3.247194072 | 7.393500000  |
| O | 1.266698949  | 3.247194072 | 10.350900000 |
| O | 5.227599738  | 3.247194072 | 7.393500000  |
| O | 5.227599738  | 3.247194072 | 10.350900000 |
| O | 7.761098949  | 3.247194072 | 1.478700000  |
| O | 7.761098949  | 3.247194072 | 4.436100000  |
| O | 11.721999738 | 3.247194072 | 1.478700000  |
| O | 11.721999738 | 3.247194072 | 4.436100000  |
| O | 7.761098949  | 3.247194072 | 7.393500000  |
| O | 7.761098949  | 3.247194072 | 10.350900000 |
| O | 11.721999738 | 3.247194072 | 7.393500000  |
| O | 11.721999738 | 3.247194072 | 10.350900000 |
| O | 9.741600000  | 4.513896049 | 8.872200000  |
| O | 9.741600000  | 4.513896049 | 5.914800000  |

|   |              |             |              |
|---|--------------|-------------|--------------|
| O | 9.741600000  | 4.513896049 | 2.957400000  |
| O | 9.741600000  | 4.513896049 | 0.000000000  |
| O | 3.247200000  | 4.513896049 | 8.872200000  |
| O | 3.247200000  | 4.513896049 | 5.914800000  |
| O | 3.247200000  | 4.513896049 | 2.957400000  |
| O | 3.247200000  | 4.513896049 | 0.000000000  |
| O | 0.000000000  | 5.227596870 | 2.957400000  |
| O | 0.000000000  | 5.227596870 | 0.000000000  |
| O | 0.000000000  | 5.227596870 | 8.872200000  |
| O | 0.000000000  | 5.227596870 | 5.914800000  |
| O | 6.494400000  | 5.227596870 | 0.000000000  |
| O | 6.494400000  | 5.227596870 | 2.957400000  |
| O | 6.494400000  | 5.227596870 | 8.872200000  |
| O | 6.494400000  | 5.227596870 | 5.914800000  |
| O | 8.474899752  | 6.494391717 | 7.393500000  |
| O | 11.008298949 | 6.494391717 | 7.393500000  |
| O | 8.474899752  | 6.494391717 | 10.350900000 |
| O | 11.008298949 | 6.494391717 | 10.350900000 |
| O | 8.474899752  | 6.494391717 | 1.478700000  |
| O | 11.008298949 | 6.494391717 | 1.478700000  |
| O | 8.474899752  | 6.494391717 | 4.436100000  |
| O | 11.008298949 | 6.494391717 | 4.436100000  |

|   |             |             |              |
|---|-------------|-------------|--------------|
| O | 1.980499752 | 6.494391717 | 1.478700000  |
| O | 4.513898949 | 6.494391717 | 1.478700000  |
| O | 1.980499752 | 6.494391717 | 4.436100000  |
| O | 4.513898949 | 6.494391717 | 4.436100000  |
| O | 1.980499752 | 6.494391717 | 7.393500000  |
| O | 4.513898949 | 6.494391717 | 7.393500000  |
| O | 1.980499752 | 6.494391717 | 10.350900000 |
| O | 4.513898949 | 6.494391717 | 10.350900000 |
| O | 0.000000000 | 7.761086550 | 8.872200000  |
| O | 0.000000000 | 7.761086550 | 5.914800000  |
| O | 6.494400000 | 7.761086550 | 2.957400000  |
| O | 6.494400000 | 7.761086550 | 0.000000000  |
| O | 0.000000000 | 7.761086550 | 2.957400000  |
| O | 0.000000000 | 7.761086550 | 0.000000000  |
| O | 6.494400000 | 7.761086550 | 8.872200000  |
| O | 6.494400000 | 7.761086550 | 5.914800000  |
| O | 3.247200000 | 8.474887384 | 2.957400000  |
| O | 3.247200000 | 8.474887384 | 0.000000000  |
| O | 3.247200000 | 8.474887384 | 8.872200000  |
| O | 3.247200000 | 8.474887384 | 5.914800000  |
| O | 9.741600000 | 8.474887384 | 2.957400000  |
| O | 9.741600000 | 8.474887384 | 0.000000000  |

|   |              |              |              |
|---|--------------|--------------|--------------|
| O | 9.741600000  | 8.474887384  | 8.872200000  |
| O | 9.741600000  | 8.474887384  | 5.914800000  |
| O | 1.269891077  | 9.781883221  | 1.482067532  |
| O | 1.268989524  | 9.782784411  | 4.442259909  |
| O | 5.209489325  | 9.769990589  | 1.481929481  |
| O | 5.208670900  | 9.770406715  | 4.439766939  |
| O | 1.269363212  | 9.781531389  | 7.397671235  |
| O | 1.269714559  | 9.781659263  | 10.355817092 |
| O | 5.208931456  | 9.770391355  | 7.397999033  |
| O | 5.209668570  | 9.770045596  | 10.355405895 |
| O | 7.771107209  | 9.779477548  | 1.483406406  |
| O | 7.770267483  | 9.779350031  | 4.440130581  |
| O | 11.702394963 | 9.769668761  | 1.481550106  |
| O | 11.701870086 | 9.770095960  | 4.442787864  |
| O | 7.770366328  | 9.779064637  | 7.396684055  |
| O | 7.771471805  | 9.779522554  | 10.354256531 |
| O | 11.701616285 | 9.768967240  | 7.396816783  |
| O | 11.702063489 | 9.770078457  | 10.356837749 |
| O | 9.739761695  | 11.059935616 | 2.960725537  |
| O | 9.738937686  | 11.059886681 | 0.002984371  |
| O | 3.240128378  | 11.061925163 | 2.960731925  |
| O | 3.240238003  | 11.055538611 | 0.003725378  |

|   |              |              |              |
|---|--------------|--------------|--------------|
| O | 3.238873270  | 11.062171981 | 8.876946745  |
| O | 3.240275151  | 11.062462019 | 5.918712640  |
| O | 9.739384111  | 11.059780596 | 8.874719705  |
| O | 9.739241494  | 11.060308523 | 5.918067217  |
| O | 6.471958471  | 11.785999488 | 8.878937075  |
| O | -0.030354566 | 11.792716442 | 2.964994367  |
| O | 6.472191490  | 11.785482635 | 0.006700285  |
| O | 6.472337484  | 11.785910191 | 5.921738415  |
| O | -0.031000109 | 11.792607141 | 0.009140259  |
| O | -0.031367303 | 11.793454396 | 5.924847707  |
| O | 6.471545037  | 11.786001989 | 2.964295829  |
| O | -0.030771247 | 11.791976344 | 8.878093270  |
| O | 8.455762314  | 13.080880879 | 1.487216129  |
| O | 8.456158732  | 13.081345940 | 4.444730166  |
| O | 10.978369507 | 13.108444854 | 1.487780756  |
| O | 10.979016869 | 13.108849192 | 4.443745589  |
| O | 1.953522144  | 13.076797128 | 1.489393485  |
| O | 1.953308868  | 13.076651752 | 4.446743209  |
| O | 4.483749866  | 13.097516276 | 1.488366676  |
| O | 4.484399306  | 13.096902624 | 4.447650776  |
| O | 1.952661247  | 13.077113241 | 7.402913049  |
| O | 1.953276007  | 13.077246830 | 10.361669786 |

|   |              |              |              |
|---|--------------|--------------|--------------|
| O | 4.483677908  | 13.096485070 | 7.403634773  |
| O | 4.482572172  | 13.098053133 | 10.361666829 |
| O | 8.455599045  | 13.081967807 | 7.401966918  |
| O | 8.454874919  | 13.081272001 | 10.359850394 |
| O | 10.978083493 | 13.109320326 | 7.402957292  |
| O | 10.978207536 | 13.107135396 | 10.358575873 |
| O | -0.027657442 | 14.410475754 | 2.971270561  |
| O | -0.024876280 | 14.391512907 | 5.931584073  |
| O | -0.028934111 | 14.409357035 | 8.889987460  |
| O | -0.024640923 | 14.392627697 | 0.016503712  |
| O | 6.475249833  | 14.393958943 | 2.972736722  |
| O | 6.472451786  | 14.394153611 | 5.930445947  |
| O | 6.473454391  | 14.393711768 | 8.888207342  |
| O | 6.472487245  | 14.393685693 | 0.015987941  |
| O | 9.677098399  | 15.107202918 | 8.893644344  |
| O | 3.191741851  | 15.092232381 | 8.880940418  |
| O | 9.674756128  | 15.107339007 | 5.933839859  |
| O | 9.677863439  | 15.108138755 | 2.974788092  |
| O | 3.191767698  | 15.093099281 | 2.988348008  |
| O | 9.678955927  | 15.107371511 | 0.019662688  |
| O | 3.193636916  | 15.081748148 | 0.022010627  |
| O | 3.195265972  | 15.090952571 | 5.936064416  |

|   |              |              |              |
|---|--------------|--------------|--------------|
| O | 1.226099208  | 16.441104072 | 10.371792257 |
| O | 5.169486938  | 16.433509504 | 4.453761356  |
| O | 5.168582398  | 16.434031358 | 7.420700391  |
| O | 7.729569676  | 16.460229797 | 1.499275696  |
| O | 7.729796331  | 16.462961584 | 4.458795561  |
| O | 5.160475178  | 16.427004007 | 10.375163456 |
| O | 11.646162162 | 16.423864310 | 1.493240589  |
| O | 11.640916115 | 16.405540119 | 4.451963494  |
| O | 1.216227590  | 16.440542570 | 4.448437800  |
| O | 1.226948935  | 16.442797152 | 1.497173458  |
| O | 5.161267106  | 16.429130001 | 1.500979277  |
| O | 7.728681502  | 16.461946808 | 7.415346432  |
| O | 7.728457705  | 16.459225737 | 10.373155145 |
| O | 1.215569317  | 16.440366476 | 7.422325896  |
| O | 11.639719587 | 16.406025182 | 7.418368067  |
| O | 11.644840032 | 16.424337229 | 10.377168691 |
| O | 3.206259173  | 17.688457081 | 8.907111752  |
| O | 3.192530141  | 17.685093783 | 0.022397928  |
| O | 9.695912286  | 17.716285020 | 2.979929473  |
| O | 9.693620152  | 17.714394771 | 5.937252817  |
| O | 3.206181370  | 17.690897044 | 2.969489141  |
| O | 3.188057577  | 17.668521965 | 5.937195680  |



|   |              |              |              |
|---|--------------|--------------|--------------|
| O | 9.693983839  | 17.714477639 | 8.892418797  |
| O | 9.696395989  | 17.712045892 | 0.021087918  |
| O | 6.426435974  | 18.486864735 | 0.024196974  |
| O | 6.420248499  | 18.496497785 | 5.939586088  |
| O | -0.075160341 | 18.485679222 | 0.023344059  |
| O | 6.421189798  | 18.491309961 | 2.986985238  |
| O | -0.124450369 | 18.448096074 | 5.938071544  |
| O | 6.419202122  | 18.490651303 | 8.894050809  |
| O | -0.092959802 | 18.451296852 | 8.892700933  |
| O | -0.092153977 | 18.451289708 | 2.981257109  |
| O | 1.916802937  | 19.806688684 | 4.427890731  |
| O | 4.404109169  | 19.896364026 | 1.497853424  |
| O | 4.399356307  | 19.949211677 | 4.433415509  |
| O | 1.917731506  | 19.807602733 | 7.451375135  |
| O | 1.950385349  | 19.873108831 | 10.373302896 |
| O | 4.400130180  | 19.945036486 | 7.442828841  |
| O | 4.403500903  | 19.897849935 | 10.378819276 |
| O | 8.448117886  | 19.891779496 | 1.504515381  |
| O | 8.452257546  | 19.909877228 | 4.457815952  |
| O | 10.899697644 | 19.914584632 | 1.502190510  |
| O | 10.903962257 | 19.916424159 | 4.472991791  |
| O | 8.450682134  | 19.906300330 | 7.420733040  |

|   |              |              |              |
|---|--------------|--------------|--------------|
| O | 8.447559497  | 19.892452441 | 10.373570955 |
| O | 10.902757805 | 19.918442638 | 7.407061335  |
| O | 10.899311357 | 19.911049525 | 10.375386562 |
| O | 1.950840087  | 19.877142575 | 1.502900641  |
| O | 6.441156441  | 21.104279358 | 2.972121937  |
| O | 6.435699586  | 21.102496267 | 5.934454407  |
| O | -0.060972025 | 21.048306655 | 2.997255933  |
| O | 0.016047013  | 21.087113891 | 5.938118153  |
| O | -0.060583660 | 21.047943035 | 8.880583992  |
| O | -0.060075018 | 21.095278177 | 0.021218990  |
| O | 6.440778077  | 21.104501531 | 8.895771306  |
| O | 6.433721652  | 21.101780816 | 0.019377595  |
| H | 0.000000000  | 0.932897449  | 9.814799089  |
| H | 0.816399334  | 0.932897449  | 8.400899272  |
| H | 6.457698847  | 0.932897449  | 6.856699960  |
| H | 0.834099172  | 0.932897449  | -0.439201108 |
| H | 0.000000000  | 0.932897449  | 3.899999089  |
| H | 0.816399334  | 0.932897449  | 2.486099272  |
| H | 6.457698847  | 0.932897449  | 0.941899960  |
| H | 0.834099172  | 0.932897449  | 5.475598892  |
| H | 6.494400000  | 0.932897449  | 9.814799089  |
| H | 7.310799334  | 0.932897449  | 8.400899272  |

|   |              |              |              |
|---|--------------|--------------|--------------|
| H | -0.036701153 | 0.932897449  | 6.856699960  |
| H | 7.328499172  | 0.932897449  | -0.439201108 |
| H | 6.494400000  | 0.932897449  | 3.899999089  |
| H | 7.310799334  | 0.932897449  | 2.486099272  |
| H | -0.036701153 | 0.932897449  | 0.941899960  |
| H | 7.328499172  | 0.932897449  | 5.475598892  |
| H | 2.840144257  | 21.634298927 | 5.940151661  |
| H | 0.829531790  | 21.643138659 | 5.937906639  |

TS1-3:

|    |             |             |              |
|----|-------------|-------------|--------------|
| Ti | 3.247200000 | 3.247194072 | 1.478700000  |
| Ti | 3.247200000 | 3.247194072 | 4.436100000  |
| Ti | 0.000000000 | 3.247194072 | 2.957400000  |
| Ti | 0.000000000 | 3.247194072 | 0.000000000  |
| Ti | 3.247200000 | 3.247194072 | 7.393500000  |
| Ti | 3.247200000 | 3.247194072 | 10.350900000 |
| Ti | 0.000000000 | 3.247194072 | 8.872200000  |
| Ti | 0.000000000 | 3.247194072 | 5.914800000  |
| Ti | 9.741600000 | 3.247194072 | 1.478700000  |
| Ti | 9.741600000 | 3.247194072 | 4.436100000  |
| Ti | 6.494400000 | 3.247194072 | 2.957400000  |
| Ti | 6.494400000 | 3.247194072 | 0.000000000  |
| Ti | 9.741600000 | 3.247194072 | 7.393500000  |

|    |              |             |              |
|----|--------------|-------------|--------------|
| Ti | 9.741600000  | 3.247194072 | 10.350900000 |
| Ti | 6.494400000  | 3.247194072 | 8.872200000  |
| Ti | 6.494400000  | 3.247194072 | 5.914800000  |
| Ti | 0.000000000  | 6.494391717 | 4.436100000  |
| Ti | 0.000000000  | 6.494391717 | 1.478700000  |
| Ti | 3.247200000  | 6.494391717 | 2.957400000  |
| Ti | 3.247200000  | 6.494391717 | 0.000000000  |
| Ti | 0.000000000  | 6.494391717 | 10.350900000 |
| Ti | 0.000000000  | 6.494391717 | 7.393500000  |
| Ti | 3.247200000  | 6.494391717 | 8.872200000  |
| Ti | 3.247200000  | 6.494391717 | 5.914800000  |
| Ti | 6.494400000  | 6.494391717 | 4.436100000  |
| Ti | 6.494400000  | 6.494391717 | 1.478700000  |
| Ti | 9.741600000  | 6.494391717 | 2.957400000  |
| Ti | 9.741600000  | 6.494391717 | 0.000000000  |
| Ti | 6.494400000  | 6.494391717 | 10.350900000 |
| Ti | 6.494400000  | 6.494391717 | 7.393500000  |
| Ti | 9.741600000  | 6.494391717 | 8.872200000  |
| Ti | 9.741600000  | 6.494391717 | 5.914800000  |
| Ti | 3.232018561  | 9.723915612 | 1.484886881  |
| Ti | 3.232429916  | 9.730141430 | 4.438785319  |
| Ti | -0.017752053 | 9.828515056 | 2.967561626  |

|    |              |              |              |
|----|--------------|--------------|--------------|
| Ti | -0.016349003 | 9.820303264  | 0.009877716  |
| Ti | 3.232602407  | 9.729330609  | 7.395735794  |
| Ti | 3.233268343  | 9.724747864  | 10.350426816 |
| Ti | -0.015934530 | 9.827918549  | 8.882882129  |
| Ti | -0.016552018 | 9.815895542  | 5.925127241  |
| Ti | 9.721854426  | 9.724944319  | 1.479492583  |
| Ti | 9.723038096  | 9.723922756  | 4.436738798  |
| Ti | 6.475356861  | 9.834815883  | 2.967857366  |
| Ti | 6.475310101  | 9.834801595  | 0.009972353  |
| Ti | 9.723322291  | 9.724447825  | 7.394529175  |
| Ti | 9.722802739  | 9.724026341  | 10.351988323 |
| Ti | 6.476314135  | 9.836398234  | 8.881746487  |
| Ti | 6.476221135  | 9.835326664  | 5.924902478  |
| Ti | -0.033008048 | 13.159713011 | 1.508640718  |
| Ti | -0.035666595 | 13.149665264 | 4.474179482  |
| Ti | 3.215678131  | 12.984000662 | 2.987825731  |
| Ti | 3.210758493  | 12.977974871 | 5.941061712  |
| Ti | 6.459439086  | 13.167689058 | 1.510308691  |
| Ti | 6.459300496  | 13.169646458 | 4.467625884  |
| Ti | 9.707447899  | 12.972988503 | 2.978716939  |
| Ti | 9.701760753  | 12.972009803 | 5.937146114  |
| Ti | -0.040530381 | 13.154044410 | 7.424990395  |

|    |              |              |              |
|----|--------------|--------------|--------------|
| Ti | -0.034262246 | 13.155633905 | 10.389287052 |
| Ti | 3.209962409  | 12.981857524 | 8.893635235  |
| Ti | 3.211211542  | 12.963555122 | 0.026935999  |
| Ti | 6.458413620  | 13.170003648 | 7.424410745  |
| Ti | 6.454969250  | 13.169060667 | 10.382082826 |
| Ti | 9.703697123  | 12.972452718 | 8.896722761  |
| Ti | 9.703890786  | 12.972809908 | 0.022180500  |
| Ti | 9.683356662  | 16.298017791 | 1.501318195  |
| Ti | 9.681437697  | 16.295278146 | 4.458801002  |
| Ti | 6.435638669  | 16.623267625 | 2.990901427  |
| Ti | -0.073533883 | 16.576740090 | 5.943912646  |
| Ti | 3.202600357  | 16.247139685 | 1.520588614  |
| Ti | 3.187777799  | 16.343391604 | 4.498359185  |
| Ti | -0.058138518 | 16.551790386 | 2.978255585  |
| Ti | 6.429816439  | 16.631236528 | 5.943545928  |
| Ti | 3.179642913  | 16.336397829 | 7.386236626  |
| Ti | 3.195086986  | 16.248868483 | 10.363936219 |
| Ti | -0.075815755 | 16.552708364 | 8.903938817  |
| Ti | 6.438358394  | 16.624357054 | 0.033028243  |
| Ti | 9.666948950  | 16.295128126 | 7.416331128  |
| Ti | 9.669015728  | 16.299000063 | 10.374287119 |
| Ti | 6.420786885  | 16.626696647 | 8.900460914  |

|    |              |              |              |
|----|--------------|--------------|--------------|
| Ti | -0.050871934 | 16.600132446 | 0.023812985  |
| Ti | 3.190092533  | 19.498477158 | 8.902306332  |
| Ti | 3.196314298  | 19.500966771 | 2.973239834  |
| Ti | 3.176485726  | 19.496666206 | 0.022559047  |
| Ti | 6.400875574  | 19.999896544 | 7.407328802  |
| Ti | 6.414914779  | 19.992567011 | 1.490020927  |
| Ti | 6.405311120  | 19.998449926 | 4.448189851  |
| Ti | 6.410170100  | 19.996856859 | 10.365710659 |
| Ti | 3.117085086  | 19.687734142 | 5.939062510  |
| Ti | -0.058501685 | 19.966274274 | 1.493096623  |
| Ti | -0.087291101 | 19.875844547 | 4.410512575  |
| Ti | 9.680692270  | 19.551894884 | 2.979686966  |
| Ti | 9.647246629  | 19.548137248 | 5.938991532  |
| Ti | -0.094246083 | 19.877241159 | 7.472013055  |
| Ti | -0.065589284 | 19.963209586 | 10.386045742 |
| Ti | 9.670730769  | 19.550937615 | 8.900389937  |
| Ti | 9.669178088  | 19.547244273 | 0.026439156  |
| O  | 0.000000000  | 1.266694833  | 2.957400000  |
| O  | 0.000000000  | 1.266694833  | 0.000000000  |
| O  | 0.000000000  | 1.266694833  | 8.872200000  |
| O  | 0.000000000  | 1.266694833  | 5.914800000  |
| O  | 6.494400000  | 1.266694833  | 2.957400000  |

|   |              |             |              |
|---|--------------|-------------|--------------|
| O | 6.494400000  | 1.266694833 | 0.000000000  |
| O | 6.494400000  | 1.266694833 | 8.872200000  |
| O | 6.494400000  | 1.266694833 | 5.914800000  |
| O | 9.741600000  | 1.980495667 | 8.872200000  |
| O | 9.741600000  | 1.980495667 | 5.914800000  |
| O | 9.741600000  | 1.980495667 | 2.957400000  |
| O | 9.741600000  | 1.980495667 | 0.000000000  |
| O | 3.247200000  | 1.980495667 | 8.872200000  |
| O | 3.247200000  | 1.980495667 | 5.914800000  |
| O | 3.247200000  | 1.980495667 | 2.957400000  |
| O | 3.247200000  | 1.980495667 | 0.000000000  |
| O | 1.266698949  | 3.247194072 | 1.478700000  |
| O | 1.266698949  | 3.247194072 | 4.436100000  |
| O | 5.227599738  | 3.247194072 | 1.478700000  |
| O | 5.227599738  | 3.247194072 | 4.436100000  |
| O | 1.266698949  | 3.247194072 | 7.393500000  |
| O | 1.266698949  | 3.247194072 | 10.350900000 |
| O | 5.227599738  | 3.247194072 | 7.393500000  |
| O | 5.227599738  | 3.247194072 | 10.350900000 |
| O | 7.761098949  | 3.247194072 | 1.478700000  |
| O | 7.761098949  | 3.247194072 | 4.436100000  |
| O | 11.721999738 | 3.247194072 | 1.478700000  |



|   |              |             |              |
|---|--------------|-------------|--------------|
| O | 11.721999738 | 3.247194072 | 4.436100000  |
| O | 7.761098949  | 3.247194072 | 7.393500000  |
| O | 7.761098949  | 3.247194072 | 10.350900000 |
| O | 11.721999738 | 3.247194072 | 7.393500000  |
| O | 11.721999738 | 3.247194072 | 10.350900000 |
| O | 9.741600000  | 4.513896049 | 8.872200000  |
| O | 9.741600000  | 4.513896049 | 5.914800000  |
| O | 9.741600000  | 4.513896049 | 2.957400000  |
| O | 9.741600000  | 4.513896049 | 0.000000000  |
| O | 3.247200000  | 4.513896049 | 8.872200000  |
| O | 3.247200000  | 4.513896049 | 5.914800000  |
| O | 3.247200000  | 4.513896049 | 2.957400000  |
| O | 3.247200000  | 4.513896049 | 0.000000000  |
| O | 0.000000000  | 5.227596870 | 2.957400000  |
| O | 0.000000000  | 5.227596870 | 0.000000000  |
| O | 0.000000000  | 5.227596870 | 8.872200000  |
| O | 0.000000000  | 5.227596870 | 5.914800000  |
| O | 6.494400000  | 5.227596870 | 0.000000000  |
| O | 6.494400000  | 5.227596870 | 2.957400000  |
| O | 6.494400000  | 5.227596870 | 8.872200000  |
| O | 6.494400000  | 5.227596870 | 5.914800000  |
| O | 8.474899752  | 6.494391717 | 7.393500000  |

|   |              |             |              |
|---|--------------|-------------|--------------|
| O | 11.008298949 | 6.494391717 | 7.393500000  |
| O | 8.474899752  | 6.494391717 | 10.350900000 |
| O | 11.008298949 | 6.494391717 | 10.350900000 |
| O | 8.474899752  | 6.494391717 | 1.478700000  |
| O | 11.008298949 | 6.494391717 | 1.478700000  |
| O | 8.474899752  | 6.494391717 | 4.436100000  |
| O | 11.008298949 | 6.494391717 | 4.436100000  |
| O | 1.980499752  | 6.494391717 | 1.478700000  |
| O | 4.513898949  | 6.494391717 | 1.478700000  |
| O | 1.980499752  | 6.494391717 | 4.436100000  |
| O | 4.513898949  | 6.494391717 | 4.436100000  |
| O | 1.980499752  | 6.494391717 | 7.393500000  |
| O | 4.513898949  | 6.494391717 | 7.393500000  |
| O | 1.980499752  | 6.494391717 | 10.350900000 |
| O | 4.513898949  | 6.494391717 | 10.350900000 |
| O | 0.000000000  | 7.761086550 | 8.872200000  |
| O | 0.000000000  | 7.761086550 | 5.914800000  |
| O | 6.494400000  | 7.761086550 | 2.957400000  |
| O | 6.494400000  | 7.761086550 | 0.000000000  |
| O | 0.000000000  | 7.761086550 | 2.957400000  |
| O | 0.000000000  | 7.761086550 | 0.000000000  |
| O | 6.494400000  | 7.761086550 | 8.872200000  |

|   |              |             |              |
|---|--------------|-------------|--------------|
| O | 6.494400000  | 7.761086550 | 5.914800000  |
| O | 3.247200000  | 8.474887384 | 2.957400000  |
| O | 3.247200000  | 8.474887384 | 0.000000000  |
| O | 3.247200000  | 8.474887384 | 8.872200000  |
| O | 3.247200000  | 8.474887384 | 5.914800000  |
| O | 9.741600000  | 8.474887384 | 2.957400000  |
| O | 9.741600000  | 8.474887384 | 0.000000000  |
| O | 9.741600000  | 8.474887384 | 8.872200000  |
| O | 9.741600000  | 8.474887384 | 5.914800000  |
| O | 1.266226676  | 9.778815675 | 1.489027241  |
| O | 1.266099776  | 9.778787100 | 4.447480075  |
| O | 5.202526808  | 9.770814625 | 1.488341124  |
| O | 5.202319377  | 9.771700456 | 4.446226138  |
| O | 1.266181865  | 9.779483620 | 7.403223931  |
| O | 1.266304869  | 9.779462189 | 10.361487492 |
| O | 5.202190009  | 9.772486273 | 7.403425034  |
| O | 5.202442251  | 9.771904054 | 10.360541124 |
| O | 7.764443175  | 9.778779957 | 1.488778819  |
| O | 7.764468893  | 9.778429911 | 4.446107842  |
| O | 11.695628707 | 9.771253969 | 1.488672353  |
| O | 11.695627798 | 9.770796766 | 4.446853106  |
| O | 7.764654373  | 9.778526352 | 7.403531501  |

|   |              |              |              |
|---|--------------|--------------|--------------|
| O | 7.764449410  | 9.779079996  | 10.360884182 |
| O | 11.695745607 | 9.770693181  | 7.403318568  |
| O | 11.695804186 | 9.771629018  | 10.361049797 |
| O | 9.728226472  | 11.061255433 | 2.967727241  |
| O | 9.727455976  | 11.061133988 | 0.010291752  |
| O | 3.230554333  | 11.059165873 | 2.968235914  |
| O | 3.230328198  | 11.054600988 | 0.010622981  |
| O | 3.229371443  | 11.059022997 | 8.882077716  |
| O | 3.230294687  | 11.059476628 | 5.925115411  |
| O | 9.727779267  | 11.061069694 | 8.882184182  |
| O | 9.727198538  | 11.061480462 | 5.924949797  |
| O | 6.464761896  | 11.788097264 | 8.888406552  |
| O | -0.036489176 | 11.789518879 | 2.975250866  |
| O | 6.463198564  | 11.787632917 | 0.016738884  |
| O | 6.465644875  | 11.787775793 | 5.931420588  |
| O | -0.036340324 | 11.789783199 | 0.016667906  |
| O | -0.038983675 | 11.789786771 | 5.932083046  |
| O | 6.465209490  | 11.787457894 | 2.974056077  |
| O | -0.036792724 | 11.789986798 | 8.887803242  |
| O | 8.446503378  | 13.087474958 | 1.500064258  |
| O | 8.446358553  | 13.088978727 | 4.455973728  |
| O | 10.967653487 | 13.110349389 | 1.498254329  |

|   |              |              |              |
|---|--------------|--------------|--------------|
| O | 10.966941051 | 13.110745870 | 4.456683504  |
| O | 1.949187652  | 13.081109837 | 1.501933334  |
| O | 1.947568858  | 13.079477480 | 4.458564410  |
| O | 4.475210639  | 13.095976074 | 1.500383657  |
| O | 4.475420019  | 13.095033093 | 4.459912985  |
| O | 1.946007214  | 13.080434749 | 7.412451019  |
| O | 1.947845779  | 13.081952805 | 10.371235082 |
| O | 4.474100487  | 13.095386711 | 7.412190768  |
| O | 4.473406885  | 13.095943927 | 10.370395181 |
| O | 8.445787175  | 13.089235904 | 7.415313782  |
| O | 8.445265285  | 13.087032043 | 10.371566311 |
| O | 10.965579565 | 13.110906605 | 7.413775934  |
| O | 10.966757779 | 13.109981484 | 10.371424356 |
| O | -0.034743481 | 14.398939954 | 2.980384913  |
| O | -0.033331859 | 14.394278628 | 5.937702106  |
| O | -0.037798187 | 14.399772206 | 8.895717245  |
| O | -0.030233900 | 14.394792981 | 0.022783810  |
| O | 6.462873715  | 14.396614649 | 2.980810778  |
| O | 6.463714869  | 14.396864681 | 5.937749424  |
| O | 6.460395971  | 14.397186152 | 8.895279550  |
| O | 6.467406806  | 14.395753821 | 0.023032231  |
| O | 9.672514521  | 15.114741050 | 8.899881264  |

|   |              |              |              |
|---|--------------|--------------|--------------|
| O | 3.188455814  | 15.097167315 | 8.879735455  |
| O | 9.669355905  | 15.112765791 | 5.939239954  |
| O | 9.674386857  | 15.114508877 | 2.979225612  |
| O | 3.190846403  | 15.098131727 | 3.003831180  |
| O | 9.672184606  | 15.115362560 | 0.024345317  |
| O | 3.193097621  | 15.079293540 | 0.026450986  |
| O | 3.191335431  | 15.106425673 | 5.939748626  |
| O | 1.228793215  | 16.442533189 | 10.370253226 |
| O | 5.160982261  | 16.435028632 | 4.465401919  |
| O | 5.158346314  | 16.435303668 | 7.417218348  |
| O | 7.729757234  | 16.466822091 | 1.509646234  |
| O | 7.726810855  | 16.465279031 | 4.462480008  |
| O | 5.159971862  | 16.421080373 | 10.385477921 |
| O | 11.646482076 | 16.421030366 | 1.494421538  |
| O | 11.640531257 | 16.401592100 | 4.455358589  |
| O | 1.222269330  | 16.453016707 | 4.455181145  |
| O | 1.231420199  | 16.439836406 | 1.505174645  |
| O | 5.162480130  | 16.419444444 | 1.502158097  |
| O | 7.723317907  | 16.465346897 | 7.424268790  |
| O | 7.725959829  | 16.467025689 | 10.371956688 |
| O | 1.219403741  | 16.452523786 | 7.427025086  |
| O | 11.636626954 | 16.403242317 | 7.423215955  |

|   |              |              |              |
|---|--------------|--------------|--------------|
| O | 11.643076023 | 16.421466138 | 10.386672710 |
| O | 3.234176650  | 17.676948785 | 8.919825970  |
| O | 3.194644977  | 17.677998923 | 0.026415497  |
| O | 9.703424358  | 17.726651737 | 2.987092296  |
| O | 9.692113711  | 17.722451186 | 5.941085371  |
| O | 3.231046219  | 17.678145371 | 2.962569535  |
| O | 3.181093373  | 17.716600418 | 5.941511237  |
| O | 9.699835942  | 17.725962361 | 8.895255890  |
| O | 9.693281794  | 17.722422611 | 0.026510134  |
| O | 6.430283127  | 18.488844637 | 0.027267228  |
| O | 6.414150518  | 18.497727946 | 5.943344825  |
| O | -0.076091897 | 18.477975353 | 0.023990429  |
| O | 6.406971478  | 18.491327106 | 2.990854109  |
| O | -0.155792083 | 18.442913609 | 5.938636644  |
| O | 6.399196123  | 18.493913160 | 8.894262204  |
| O | -0.128067750 | 18.456518966 | 8.903524781  |
| O | -0.120506320 | 18.455490259 | 2.974813171  |
| O | 1.906113674  | 19.689495088 | 4.376904682  |
| O | 4.407611079  | 19.898097468 | 1.480557247  |
| O | 4.374615501  | 19.951708076 | 4.463402717  |
| O | 1.903958832  | 19.684644451 | 7.498937225  |
| O | 1.949637584  | 19.860131770 | 10.370004804 |

|   |              |              |              |
|---|--------------|--------------|--------------|
| O | 4.372707446  | 19.953515456 | 7.409517278  |
| O | 4.404761466  | 19.904884073 | 10.394243654 |
| O | 8.448018002  | 19.901305032 | 1.512426190  |
| O | 8.441422679  | 19.907305819 | 4.452673270  |
| O | 10.897536048 | 19.927969246 | 1.498301647  |
| O | 10.898612430 | 19.958316086 | 4.482862409  |
| O | 8.439114049  | 19.906059227 | 7.422967534  |
| O | 8.444489984  | 19.898418939 | 10.367213018 |
| O | 10.895307170 | 19.958698279 | 7.397734997  |
| O | 10.893463410 | 19.929087250 | 10.378202717 |
| O | 1.952314965  | 19.864443051 | 1.504062662  |
| O | 6.418912471  | 21.102530558 | 2.973369960  |
| O | 6.423245665  | 21.105016598 | 5.932023898  |
| O | -0.051452144 | 21.053202654 | 2.996603294  |
| O | 0.228840055  | 21.045644519 | 5.940470232  |
| O | -0.050675284 | 21.053581275 | 8.882633707  |
| O | -0.053909625 | 21.085592620 | 0.022831128  |
| O | 6.421130439  | 21.105130899 | 8.891375782  |
| O | 6.439220850  | 21.103916454 | 0.018832723  |
| H | 0.000000000  | 0.932897449  | 9.814799089  |
| H | 0.816399334  | 0.932897449  | 8.400899272  |
| H | 6.457698847  | 0.932897449  | 6.856699960  |



|   |              |              |              |
|---|--------------|--------------|--------------|
| H | 0.834099172  | 0.932897449  | -0.439201108 |
| H | 0.000000000  | 0.932897449  | 3.899999089  |
| H | 0.816399334  | 0.932897449  | 2.486099272  |
| H | 6.457698847  | 0.932897449  | 0.941899960  |
| H | 0.834099172  | 0.932897449  | 5.475598892  |
| H | 6.494400000  | 0.932897449  | 9.814799089  |
| H | 7.310799334  | 0.932897449  | 8.400899272  |
| H | -0.036701153 | 0.932897449  | 6.856699960  |
| H | 7.328499172  | 0.932897449  | -0.439201108 |
| H | 6.494400000  | 0.932897449  | 3.899999089  |
| H | 7.310799334  | 0.932897449  | 2.486099272  |
| H | -0.036701153 | 0.932897449  | 0.941899960  |
| H | 7.328499172  | 0.932897449  | 5.475598892  |
| H | 2.427131460  | 21.465946115 | 5.941357452  |
| H | 1.399021050  | 21.354460053 | 5.940553039  |

TS2-1:

|    |             |             |              |
|----|-------------|-------------|--------------|
| Ti | 3.247200000 | 3.247190143 | 1.478700000  |
| Ti | 3.247200000 | 3.247190143 | 4.436100000  |
| Ti | 0.000000000 | 3.247190143 | 2.957400000  |
| Ti | 0.000000000 | 3.247190143 | 0.000000000  |
| Ti | 3.247200000 | 3.247190143 | 7.393500000  |
| Ti | 3.247200000 | 3.247190143 | 10.350900000 |

|    |             |             |              |
|----|-------------|-------------|--------------|
| Ti | 0.000000000 | 3.247190143 | 8.872200000  |
| Ti | 0.000000000 | 3.247190143 | 5.914800000  |
| Ti | 9.741600000 | 3.247190143 | 1.478700000  |
| Ti | 9.741600000 | 3.247190143 | 4.436100000  |
| Ti | 6.494400000 | 3.247190143 | 2.957400000  |
| Ti | 6.494400000 | 3.247190143 | 0.000000000  |
| Ti | 9.741600000 | 3.247190143 | 7.393500000  |
| Ti | 9.741600000 | 3.247190143 | 10.350900000 |
| Ti | 6.494400000 | 3.247190143 | 8.872200000  |
| Ti | 6.494400000 | 3.247190143 | 5.914800000  |
| Ti | 0.000000000 | 6.494389931 | 4.436100000  |
| Ti | 0.000000000 | 6.494389931 | 1.478700000  |
| Ti | 3.247200000 | 6.494389931 | 2.957400000  |
| Ti | 3.247200000 | 6.494389931 | 0.000000000  |
| Ti | 0.000000000 | 6.494389931 | 10.350900000 |
| Ti | 0.000000000 | 6.494389931 | 7.393500000  |
| Ti | 3.247200000 | 6.494389931 | 8.872200000  |
| Ti | 3.247200000 | 6.494389931 | 5.914800000  |
| Ti | 6.494400000 | 6.494389931 | 4.436100000  |
| Ti | 6.494400000 | 6.494389931 | 1.478700000  |
| Ti | 9.741600000 | 6.494389931 | 2.957400000  |
| Ti | 9.741600000 | 6.494389931 | 0.000000000  |

|    |              |              |              |
|----|--------------|--------------|--------------|
| Ti | 6.494400000  | 6.494389931  | 10.350900000 |
| Ti | 6.494400000  | 6.494389931  | 7.393500000  |
| Ti | 9.741600000  | 6.494389931  | 8.872200000  |
| Ti | 9.741600000  | 6.494389931  | 5.914800000  |
| Ti | 3.245550163  | 9.734522719  | 1.482679714  |
| Ti | 3.237275518  | 9.736326884  | 4.439428021  |
| Ti | -0.015647867 | 9.769797706  | 2.965147442  |
| Ti | -0.008170475 | 9.769948797  | 0.011065171  |
| Ti | 3.241392708  | 9.734507360  | 7.397128257  |
| Ti | 3.246851900  | 9.735866110  | 10.354651639 |
| Ti | -0.013610964 | 9.780378738  | 8.888187350  |
| Ti | -0.013777740 | 9.742100499  | 5.928112440  |
| Ti | 9.720340452  | 9.735273532  | 1.478707808  |
| Ti | 9.720149257  | 9.734668095  | 4.436586670  |
| Ti | 6.478003978  | 9.833002788  | 2.967503425  |
| Ti | 6.483956096  | 9.834477982  | 0.008427407  |
| Ti | 9.720535414  | 9.734950632  | 7.393878074  |
| Ti | 9.721170176  | 9.735738593  | 10.351076853 |
| Ti | 6.481388340  | 9.834143295  | 8.879284747  |
| Ti | 6.478305188  | 9.833806465  | 5.923038488  |
| Ti | -0.028493531 | 13.127413772 | 1.442120747  |
| Ti | -0.027429878 | 13.029925976 | 4.428586666  |

|    |              |              |              |
|----|--------------|--------------|--------------|
| Ti | 3.220054187  | 12.988030834 | 2.966161830  |
| Ti | 3.221780399  | 12.988612339 | 5.924254335  |
| Ti | 6.468835314  | 13.167487961 | 1.508210948  |
| Ti | 6.467797898  | 13.167820147 | 4.465490168  |
| Ti | 9.716045185  | 12.985626590 | 2.964639833  |
| Ti | 9.710276729  | 12.987974041 | 5.922524019  |
| Ti | -0.026342196 | 13.040012300 | 7.430210088  |
| Ti | -0.026322193 | 13.152397408 | 10.407388469 |
| Ti | 3.219382666  | 12.988160137 | 8.882265215  |
| Ti | 3.222096546  | 12.988221931 | 0.009539153  |
| Ti | 6.467926228  | 13.167607262 | 7.422857518  |
| Ti | 6.466348348  | 13.169057095 | 10.379449675 |
| Ti | 9.716266515  | 12.987895817 | 8.880697911  |
| Ti | 9.708594550  | 12.988533400 | 0.004893432  |
| Ti | 9.673521673  | 16.297650958 | 1.485886127  |
| Ti | 9.685218607  | 16.291186895 | 4.443704540  |
| Ti | 6.439116940  | 16.620996256 | 2.970695051  |
| Ti | -0.051969618 | 16.308505239 | 5.932493769  |
| Ti | 3.207958108  | 16.294662708 | 1.485263299  |
| Ti | 3.195550946  | 16.302415154 | 4.444880875  |
| Ti | -0.054054320 | 16.342957261 | 2.939765497  |
| Ti | 6.441741716  | 16.620291878 | 5.922712346  |

|    |              |              |              |
|----|--------------|--------------|--------------|
| Ti | 3.207135787  | 16.296407937 | 7.404376016  |
| Ti | 3.199539027  | 16.311895327 | 10.361166200 |
| Ti | -0.052263814 | 16.371409567 | 8.897369958  |
| Ti | 6.441979931  | 16.621789931 | 0.008085768  |
| Ti | 9.675541301  | 16.296066821 | 7.408119020  |
| Ti | 9.685261729  | 16.314546389 | 10.363053968 |
| Ti | 6.440717030  | 16.623050454 | 8.883061702  |
| Ti | -0.053638029 | 16.758425366 | 0.013203726  |
| Ti | 6.422329565  | 19.988362173 | 7.403986586  |
| Ti | 6.438768060  | 19.983764069 | 10.358888174 |
| Ti | 3.183797251  | 19.554083742 | 8.893812088  |
| Ti | 3.177709790  | 19.550427905 | 0.022166896  |
| Ti | 6.420141732  | 19.987145585 | 1.484563223  |
| Ti | 6.416693595  | 19.995229146 | 4.442310777  |
| Ti | 3.170666613  | 19.537301897 | 2.977731060  |
| Ti | 3.167113008  | 19.536214254 | 5.933184855  |
| Ti | -0.067914668 | 20.105994399 | 1.564059200  |
| Ti | -0.087800002 | 19.474744757 | 4.431906998  |
| Ti | 9.672982378  | 19.535358785 | 2.967310129  |
| Ti | 9.656042385  | 19.521915592 | 5.932047557  |
| Ti | -0.049481613 | 19.729483193 | 7.596357411  |
| Ti | -0.060057094 | 20.099724647 | 10.428143148 |

|    |             |              |             |
|----|-------------|--------------|-------------|
| Ti | 9.710321930 | 19.562651653 | 8.882785244 |
| Ti | 9.682626951 | 19.555033867 | 0.016164557 |
| O  | 0.000000000 | 1.266689833  | 2.957400000 |
| O  | 0.000000000 | 1.266689833  | 0.000000000 |
| O  | 0.000000000 | 1.266689833  | 8.872200000 |
| O  | 0.000000000 | 1.266689833  | 5.914800000 |
| O  | 6.494400000 | 1.266689833  | 2.957400000 |
| O  | 6.494400000 | 1.266689833  | 0.000000000 |
| O  | 6.494400000 | 1.266689833  | 8.872200000 |
| O  | 6.494400000 | 1.266689833  | 5.914800000 |
| O  | 9.741600000 | 1.980499953  | 8.872200000 |
| O  | 9.741600000 | 1.980499953  | 5.914800000 |
| O  | 9.741600000 | 1.980499953  | 2.957400000 |
| O  | 9.741600000 | 1.980499953  | 0.000000000 |
| O  | 3.247200000 | 1.980499953  | 8.872200000 |
| O  | 3.247200000 | 1.980499953  | 5.914800000 |
| O  | 3.247200000 | 1.980499953  | 2.957400000 |
| O  | 3.247200000 | 1.980499953  | 0.000000000 |
| O  | 1.266699988 | 3.247190143  | 1.478700000 |
| O  | 1.266699988 | 3.247190143  | 4.436100000 |
| O  | 5.227599998 | 3.247190143  | 1.478700000 |
| O  | 5.227599998 | 3.247190143  | 4.436100000 |

|   |              |             |              |
|---|--------------|-------------|--------------|
| O | 1.266699988  | 3.247190143 | 7.393500000  |
| O | 1.266699988  | 3.247190143 | 10.350900000 |
| O | 5.227599998  | 3.247190143 | 7.393500000  |
| O | 5.227599998  | 3.247190143 | 10.350900000 |
| O | 7.761099988  | 3.247190143 | 1.478700000  |
| O | 7.761099988  | 3.247190143 | 4.436100000  |
| O | 11.721999998 | 3.247190143 | 1.478700000  |
| O | 11.721999998 | 3.247190143 | 4.436100000  |
| O | 7.761099988  | 3.247190143 | 7.393500000  |
| O | 7.761099988  | 3.247190143 | 10.350900000 |
| O | 11.721999998 | 3.247190143 | 7.393500000  |
| O | 11.721999998 | 3.247190143 | 10.350900000 |
| O | 9.741600000  | 4.513899978 | 8.872200000  |
| O | 9.741600000  | 4.513899978 | 5.914800000  |
| O | 9.741600000  | 4.513899978 | 2.957400000  |
| O | 9.741600000  | 4.513899978 | 0.000000000  |
| O | 3.247200000  | 4.513899978 | 8.872200000  |
| O | 3.247200000  | 4.513899978 | 5.914800000  |
| O | 3.247200000  | 4.513899978 | 2.957400000  |
| O | 3.247200000  | 4.513899978 | 0.000000000  |
| O | 0.000000000  | 5.227600085 | 2.957400000  |
| O | 0.000000000  | 5.227600085 | 0.000000000  |

|   |              |             |              |
|---|--------------|-------------|--------------|
| O | 0.000000000  | 5.227600085 | 8.872200000  |
| O | 0.000000000  | 5.227600085 | 5.914800000  |
| O | 6.494400000  | 5.227600085 | 0.000000000  |
| O | 6.494400000  | 5.227600085 | 2.957400000  |
| O | 6.494400000  | 5.227600085 | 8.872200000  |
| O | 6.494400000  | 5.227600085 | 5.914800000  |
| O | 8.474900012  | 6.494389931 | 7.393500000  |
| O | 11.008299988 | 6.494389931 | 7.393500000  |
| O | 8.474900012  | 6.494389931 | 10.350900000 |
| O | 11.008299988 | 6.494389931 | 10.350900000 |
| O | 8.474900012  | 6.494389931 | 1.478700000  |
| O | 11.008299988 | 6.494389931 | 1.478700000  |
| O | 8.474900012  | 6.494389931 | 4.436100000  |
| O | 11.008299988 | 6.494389931 | 4.436100000  |
| O | 1.980500012  | 6.494389931 | 1.478700000  |
| O | 4.513899988  | 6.494389931 | 1.478700000  |
| O | 1.980500012  | 6.494389931 | 4.436100000  |
| O | 4.513899988  | 6.494389931 | 4.436100000  |
| O | 1.980500012  | 6.494389931 | 7.393500000  |
| O | 4.513899988  | 6.494389931 | 7.393500000  |
| O | 1.980500012  | 6.494389931 | 10.350900000 |
| O | 4.513899988  | 6.494389931 | 10.350900000 |



|   |             |             |              |
|---|-------------|-------------|--------------|
| O | 0.000000000 | 7.761090122 | 8.872200000  |
| O | 0.000000000 | 7.761090122 | 5.914800000  |
| O | 6.494400000 | 7.761090122 | 2.957400000  |
| O | 6.494400000 | 7.761090122 | 0.000000000  |
| O | 0.000000000 | 7.761090122 | 2.957400000  |
| O | 0.000000000 | 7.761090122 | 0.000000000  |
| O | 6.494400000 | 7.761090122 | 8.872200000  |
| O | 6.494400000 | 7.761090122 | 5.914800000  |
| O | 3.247200000 | 8.474889884 | 2.957400000  |
| O | 3.247200000 | 8.474889884 | 0.000000000  |
| O | 3.247200000 | 8.474889884 | 8.872200000  |
| O | 3.247200000 | 8.474889884 | 5.914800000  |
| O | 9.741600000 | 8.474889884 | 2.957400000  |
| O | 9.741600000 | 8.474889884 | 0.000000000  |
| O | 9.741600000 | 8.474889884 | 8.872200000  |
| O | 9.741600000 | 8.474889884 | 5.914800000  |
| O | 1.265592823 | 9.781182415 | 1.485166651  |
| O | 1.264374863 | 9.779768301 | 4.443278320  |
| O | 5.206759858 | 9.774586192 | 1.481734884  |
| O | 5.205572552 | 9.774696206 | 4.440496826  |
| O | 1.265040020 | 9.779076781 | 7.397040599  |
| O | 1.266052367 | 9.782273272 | 10.355254712 |

|   |              |              |              |
|---|--------------|--------------|--------------|
| O | 5.206468779  | 9.774129703  | 7.397843356  |
| O | 5.207032753  | 9.775120190  | 10.355207631 |
| O | 7.764414470  | 9.782768337  | 1.483329277  |
| O | 7.763525517  | 9.782886924  | 4.439743044  |
| O | 11.706463835 | 9.773346386  | 1.483332471  |
| O | 11.705738540 | 9.771517932  | 4.443732221  |
| O | 7.763907777  | 9.782473298  | 7.396835947  |
| O | 7.765007799  | 9.783584873  | 10.354212525 |
| O | 11.705788547 | 9.770714969  | 7.397480660  |
| O | 11.706512802 | 9.774394738  | 10.356943979 |
| O | 9.738197584  | 11.064467997 | 2.960884645  |
| O | 9.738325394  | 11.066200367 | 0.002851643  |
| O | 3.234431620  | 11.065315251 | 2.961371315  |
| O | 3.232585002  | 11.066185723 | 0.003803216  |
| O | 3.233304971  | 11.065872467 | 8.873869748  |
| O | 3.231606946  | 11.066502907 | 5.918845487  |
| O | 9.739000941  | 11.065654224 | 8.873577084  |
| O | 9.738739606  | 11.065703516 | 5.918211302  |
| O | 6.466566430  | 11.789467086 | 8.875044782  |
| O | -0.027952677 | 11.794538466 | 2.970200100  |
| O | 6.467301596  | 11.789458871 | 0.004496904  |
| O | 6.466677614  | 11.790017516 | 5.919094027  |

|   |              |              |              |
|---|--------------|--------------|--------------|
| O | -0.026678086 | 11.797706025 | 0.007268225  |
| O | -0.027879810 | 11.798863320 | 5.926916586  |
| O | 6.466504344  | 11.790043948 | 2.960504324  |
| O | -0.026837848 | 11.797527430 | 8.873623692  |
| O | 8.455340568  | 13.087079192 | 1.484892796  |
| O | 8.454874140  | 13.086412319 | 4.443025048  |
| O | 10.985764160 | 13.101511086 | 1.488443095  |
| O | 10.988885629 | 13.103071648 | 4.444648069  |
| O | 1.947339865  | 13.083788046 | 1.490942926  |
| O | 1.943837175  | 13.085454336 | 4.444031629  |
| O | 4.478077267  | 13.106888935 | 1.484684713  |
| O | 4.478091555  | 13.106182414 | 4.444566563  |
| O | 1.943845878  | 13.092349170 | 7.400868421  |
| O | 1.947034888  | 13.083481934 | 10.354328218 |
| O | 4.477595253  | 13.107563667 | 7.400362824  |
| O | 4.478029599  | 13.102648021 | 10.358531630 |
| O | 8.455012470  | 13.087682128 | 7.401097206  |
| O | 8.454527728  | 13.083173679 | 10.356917244 |
| O | 10.989249575 | 13.109255317 | 7.400357619  |
| O | 10.986339305 | 13.101824342 | 10.354628217 |
| O | -0.029597449 | 14.413710821 | 2.972919371  |
| O | -0.027678353 | 14.409473836 | 5.920285622  |

|   |              |              |              |
|---|--------------|--------------|--------------|
| O | -0.028570814 | 14.420999635 | 8.881747788  |
| O | -0.024243595 | 14.382984645 | 0.012114812  |
| O | 6.467268865  | 14.396464629 | 2.968490841  |
| O | 6.468821935  | 14.396536067 | 5.926978573  |
| O | 6.467500845  | 14.396917188 | 8.885880932  |
| O | 6.469184713  | 14.397538698 | 0.010305119  |
| O | 9.694780831  | 15.103059160 | 8.893252193  |
| O | 3.186939761  | 15.102199047 | 8.891540923  |
| O | 9.695185173  | 15.094704134 | 5.925713279  |
| O | 9.699604872  | 15.093662569 | 2.963084478  |
| O | 3.184129245  | 15.097505216 | 2.967343015  |
| O | 9.695293369  | 15.101217847 | 0.001876293  |
| O | 3.186346433  | 15.099800518 | 0.003865677  |
| O | 3.185566455  | 15.097997424 | 5.923533557  |
| O | 1.225809298  | 16.481586529 | 10.373137755 |
| O | 5.157831958  | 16.434202452 | 4.448119938  |
| O | 5.159005106  | 16.434236742 | 7.405371713  |
| O | 7.729312628  | 16.454620132 | 1.488414822  |
| O | 7.729074413  | 16.449442310 | 4.445562970  |
| O | 5.156147440  | 16.445191395 | 10.363471434 |
| O | 11.658435668 | 16.444514163 | 1.473640717  |
| O | 11.656575672 | 16.449182633 | 4.443584351  |

|   |              |              |              |
|---|--------------|--------------|--------------|
| O | 1.227630977  | 16.469687467 | 4.441258652  |
| O | 1.227736576  | 16.465708373 | 1.477656511  |
| O | 5.157609460  | 16.438970578 | 1.487070507  |
| O | 7.729519929  | 16.452695237 | 7.407610229  |
| O | 7.734053020  | 16.467638627 | 10.360245266 |
| O | 1.230908311  | 16.447206659 | 7.411944831  |
| O | 11.656859607 | 16.424066479 | 7.411810210  |
| O | 11.662952783 | 16.465367257 | 10.374208452 |
| O | 3.187357091  | 17.728139075 | 8.880850040  |
| O | 3.185479560  | 17.724928654 | 0.017437658  |
| O | 9.687259797  | 17.710177789 | 2.964555252  |
| O | 9.684908434  | 17.701716322 | 5.933126061  |
| O | 3.202552039  | 17.713090314 | 2.965099650  |
| O | 3.202876369  | 17.711682630 | 5.935149278  |
| O | 9.719504233  | 17.735994035 | 8.874648964  |
| O | 9.707361134  | 17.728922393 | 0.016381039  |
| O | 6.429575887  | 18.489623311 | 0.013930537  |
| O | 6.428680699  | 18.491181373 | 5.924208317  |
| O | -0.066085845 | 18.601946625 | 0.028685360  |
| O | 6.423461669  | 18.491289244 | 2.979717842  |
| O | -0.074631696 | 18.484992703 | 5.990180932  |
| O | 6.423931733  | 18.489596522 | 8.881606188  |

|   |              |              |              |
|---|--------------|--------------|--------------|
| O | -0.072350863 | 18.498519836 | 8.925002839  |
| O | -0.085106384 | 18.478757599 | 2.891229240  |
| O | 1.910194365  | 19.803168579 | 4.462808161  |
| O | 4.401895228  | 19.914591061 | 1.496874879  |
| O | 4.379079362  | 19.956807317 | 4.453795662  |
| O | 1.927374781  | 19.919356330 | 7.394134067  |
| O | 1.950071929  | 19.951154789 | 10.376312465 |
| O | 4.394047395  | 19.927409887 | 7.414237525  |
| O | 4.405786023  | 19.910083684 | 10.367268972 |
| O | 8.450180247  | 19.897382731 | 1.490445255  |
| O | 8.464137622  | 19.937608011 | 4.448069899  |
| O | 10.907793693 | 19.969483266 | 1.510875329  |
| O | 10.924086844 | 19.841556118 | 4.461180053  |
| O | 8.462808218  | 19.908069491 | 7.421626885  |
| O | 8.465082817  | 19.899178681 | 10.352456539 |
| O | 10.937568439 | 19.975965189 | 7.359178782  |
| O | 10.916240180 | 19.972825134 | 10.379713475 |
| O | 1.945652750  | 19.940259431 | 1.508132281  |
| O | 6.432853610  | 21.099869494 | 2.966169046  |
| O | 6.435359150  | 21.098334650 | 5.927555266  |
| O | -0.030242213 | 21.125502144 | 3.110629164  |
| O | -0.048738394 | 21.354278244 | 5.496899979  |

|   |              |              |              |
|---|--------------|--------------|--------------|
| O | -0.061135684 | 21.092437447 | 8.857899315  |
| O | -0.056306968 | 21.211091593 | 0.072543129  |
| O | 6.435582947  | 21.096716223 | 8.883404287  |
| O | 6.437951974  | 21.095983270 | 0.008183717  |
| H | 0.000000000  | 0.932899949  | 9.814800036  |
| H | 0.816399984  | 0.932899949  | 8.400899982  |
| H | 6.457700016  | 0.932899949  | 6.856699960  |
| H | 0.834099951  | 0.932899949  | -0.439200043 |
| H | 0.000000000  | 0.932899949  | 3.900000036  |
| H | 0.816399984  | 0.932899949  | 2.486099982  |
| H | 6.457700016  | 0.932899949  | 0.941899960  |
| H | 0.834099951  | 0.932899949  | 5.475599957  |
| H | 6.494400000  | 0.932899949  | 9.814800036  |
| H | 7.310799984  | 0.932899949  | 8.400899982  |
| H | -0.036699984 | 0.932899949  | 6.856699960  |
| H | 7.328499951  | 0.932899949  | -0.439200043 |
| H | 6.494400000  | 0.932899949  | 3.900000036  |
| H | 7.310799984  | 0.932899949  | 2.486099982  |
| H | -0.036699984 | 0.932899949  | 0.941899960  |
| H | 7.328499951  | 0.932899949  | 5.475599957  |
| H | 0.011874881  | 21.548471947 | 4.242677641  |
| H | -0.940633309 | 21.672208903 | 5.733538470  |

TS2-2:

|    |             |             |              |
|----|-------------|-------------|--------------|
| Ti | 3.247200000 | 3.247190143 | 1.478700000  |
| Ti | 3.247200000 | 3.247190143 | 4.436100000  |
| Ti | 0.000000000 | 3.247190143 | 2.957400000  |
| Ti | 0.000000000 | 3.247190143 | 0.000000000  |
| Ti | 3.247200000 | 3.247190143 | 7.393500000  |
| Ti | 3.247200000 | 3.247190143 | 10.350900000 |
| Ti | 0.000000000 | 3.247190143 | 8.872200000  |
| Ti | 0.000000000 | 3.247190143 | 5.914800000  |
| Ti | 9.741600000 | 3.247190143 | 1.478700000  |
| Ti | 9.741600000 | 3.247190143 | 4.436100000  |
| Ti | 6.494400000 | 3.247190143 | 2.957400000  |
| Ti | 6.494400000 | 3.247190143 | 0.000000000  |
| Ti | 9.741600000 | 3.247190143 | 7.393500000  |
| Ti | 9.741600000 | 3.247190143 | 10.350900000 |
| Ti | 6.494400000 | 3.247190143 | 8.872200000  |
| Ti | 6.494400000 | 3.247190143 | 5.914800000  |
| Ti | 0.000000000 | 6.494389931 | 4.436100000  |
| Ti | 0.000000000 | 6.494389931 | 1.478700000  |
| Ti | 3.247200000 | 6.494389931 | 2.957400000  |
| Ti | 3.247200000 | 6.494389931 | 0.000000000  |
| Ti | 0.000000000 | 6.494389931 | 10.350900000 |



|    |              |             |              |
|----|--------------|-------------|--------------|
| Ti | 0.000000000  | 6.494389931 | 7.393500000  |
| Ti | 3.247200000  | 6.494389931 | 8.872200000  |
| Ti | 3.247200000  | 6.494389931 | 5.914800000  |
| Ti | 6.494400000  | 6.494389931 | 4.436100000  |
| Ti | 6.494400000  | 6.494389931 | 1.478700000  |
| Ti | 9.741600000  | 6.494389931 | 2.957400000  |
| Ti | 9.741600000  | 6.494389931 | 0.000000000  |
| Ti | 6.494400000  | 6.494389931 | 10.350900000 |
| Ti | 6.494400000  | 6.494389931 | 7.393500000  |
| Ti | 9.741600000  | 6.494389931 | 8.872200000  |
| Ti | 9.741600000  | 6.494389931 | 5.914800000  |
| Ti | 3.245772661  | 9.734983494 | 1.482786299  |
| Ti | 3.240933553  | 9.734741319 | 4.438797031  |
| Ti | -0.007992139 | 9.808682096 | 2.957646292  |
| Ti | -0.010306743 | 9.761425179 | -0.001275467 |
| Ti | 3.244841104  | 9.730823305 | 7.397623325  |
| Ti | 3.247649153  | 9.735114582 | 10.356064212 |
| Ti | -0.004060429 | 9.830840718 | 8.873296367  |
| Ti | -0.014845679 | 9.750955590 | 5.918218045  |
| Ti | 9.726835631  | 9.737318800 | 1.478773935  |
| Ti | 9.724141494  | 9.731021545 | 4.436171214  |
| Ti | 6.483055972  | 9.836726491 | 2.958181937  |

|    |              |              |              |
|----|--------------|--------------|--------------|
| Ti | 6.487810392  | 9.838391710  | 0.000295858  |
| Ti | 9.725720672  | 9.734899197  | 7.394804095  |
| Ti | 9.728193870  | 9.733064670  | 10.352208472 |
| Ti | 6.485963125  | 9.836952235  | 8.872190300  |
| Ti | 6.482651630  | 9.837247274  | 5.914680403  |
| Ti | -0.025352969 | 13.102673739 | 1.445927749  |
| Ti | -0.024476614 | 13.085987977 | 4.470273348  |
| Ti | 3.212758508  | 12.988988817 | 2.958792107  |
| Ti | 3.237253307  | 12.983979588 | 5.916039151  |
| Ti | 6.471956263  | 13.172274303 | 1.503959272  |
| Ti | 6.471427099  | 13.172731149 | 4.459998040  |
| Ti | 9.726776792  | 12.984066028 | 2.959027753  |
| Ti | 9.707104345  | 12.985279402 | 5.916576096  |
| Ti | -0.022654805 | 13.119139829 | 7.391219845  |
| Ti | -0.021371382 | 13.151452999 | 10.392251077 |
| Ti | 3.214481213  | 12.982896589 | 8.874649319  |
| Ti | 3.236855070  | 12.990046099 | 0.003650496  |
| Ti | 6.472221364  | 13.172218582 | 7.418879224  |
| Ti | 6.471382677  | 13.173238358 | 10.374885224 |
| Ti | 9.728427149  | 12.983914222 | 8.874358547  |
| Ti | 9.706183959  | 12.988494467 | 0.000001301  |
| Ti | 9.702476306  | 16.295593187 | 1.477718735  |

|    |              |              |              |
|----|--------------|--------------|--------------|
| Ti | 9.702622040  | 16.295363157 | 4.435796807  |
| Ti | 6.465388086  | 16.633230362 | 2.960761144  |
| Ti | -0.032200144 | 16.519352200 | 5.915252955  |
| Ti | 3.219873253  | 16.318486192 | 1.481921318  |
| Ti | 3.221507634  | 16.301585403 | 4.436629138  |
| Ti | -0.030693314 | 16.330727442 | 2.940283752  |
| Ti | 6.459131252  | 16.630591801 | 5.917242458  |
| Ti | 3.221842745  | 16.287196014 | 7.400109079  |
| Ti | 3.223871076  | 16.299392257 | 10.357626429 |
| Ti | -0.032920633 | 16.406502745 | 8.883508506  |
| Ti | 6.458002915  | 16.632400253 | 0.003610749  |
| Ti | 9.701060397  | 16.292090228 | 7.396599355  |
| Ti | 9.699399389  | 16.308531671 | 10.354254756 |
| Ti | 6.461033851  | 16.636834763 | 8.873657407  |
| Ti | -0.033192619 | 16.700200580 | 0.000669910  |
| Ti | 6.479969703  | 20.006661360 | 7.407717641  |
| Ti | 3.192326996  | 19.583555468 | 2.955128717  |
| Ti | 3.198307689  | 19.534946588 | 8.904733411  |
| Ti | 3.204604010  | 19.555357481 | 0.008933359  |
| Ti | 6.448010501  | 19.996645760 | 1.484838971  |
| Ti | 6.451498643  | 20.000045849 | 4.441179985  |
| Ti | 6.463403138  | 19.997579811 | 10.358666724 |

|    |              |              |              |
|----|--------------|--------------|--------------|
| Ti | 3.298324696  | 19.525446412 | 5.974724968  |
| Ti | -0.042737179 | 20.044018407 | 1.474444065  |
| Ti | -0.190006791 | 19.620695700 | 4.289638432  |
| Ti | 9.652546709  | 19.541369931 | 2.935394578  |
| Ti | 9.674358151  | 19.533617485 | 5.933198813  |
| Ti | -0.018803106 | 19.779552265 | 7.522236095  |
| Ti | -0.036110163 | 20.049871675 | 10.368420229 |
| Ti | 9.736541772  | 19.549385983 | 8.875799629  |
| Ti | 9.709291009  | 19.546090193 | -0.004885507 |
| O  | 0.000000000  | 1.266689833  | 2.957400000  |
| O  | 0.000000000  | 1.266689833  | 0.000000000  |
| O  | 0.000000000  | 1.266689833  | 8.872200000  |
| O  | 0.000000000  | 1.266689833  | 5.914800000  |
| O  | 6.494400000  | 1.266689833  | 2.957400000  |
| O  | 6.494400000  | 1.266689833  | 0.000000000  |
| O  | 6.494400000  | 1.266689833  | 8.872200000  |
| O  | 6.494400000  | 1.266689833  | 5.914800000  |
| O  | 9.741600000  | 1.980499953  | 8.872200000  |
| O  | 9.741600000  | 1.980499953  | 5.914800000  |
| O  | 9.741600000  | 1.980499953  | 2.957400000  |
| O  | 9.741600000  | 1.980499953  | 0.000000000  |
| O  | 3.247200000  | 1.980499953  | 8.872200000  |

|   |              |             |              |
|---|--------------|-------------|--------------|
| O | 3.247200000  | 1.980499953 | 5.914800000  |
| O | 3.247200000  | 1.980499953 | 2.957400000  |
| O | 3.247200000  | 1.980499953 | 0.000000000  |
| O | 1.266699988  | 3.247190143 | 1.478700000  |
| O | 1.266699988  | 3.247190143 | 4.436100000  |
| O | 5.227599998  | 3.247190143 | 1.478700000  |
| O | 5.227599998  | 3.247190143 | 4.436100000  |
| O | 1.266699988  | 3.247190143 | 7.393500000  |
| O | 1.266699988  | 3.247190143 | 10.350900000 |
| O | 5.227599998  | 3.247190143 | 7.393500000  |
| O | 5.227599998  | 3.247190143 | 10.350900000 |
| O | 7.761099988  | 3.247190143 | 1.478700000  |
| O | 7.761099988  | 3.247190143 | 4.436100000  |
| O | 11.721999998 | 3.247190143 | 1.478700000  |
| O | 11.721999998 | 3.247190143 | 4.436100000  |
| O | 7.761099988  | 3.247190143 | 7.393500000  |
| O | 7.761099988  | 3.247190143 | 10.350900000 |
| O | 11.721999998 | 3.247190143 | 7.393500000  |
| O | 11.721999998 | 3.247190143 | 10.350900000 |
| O | 9.741600000  | 4.513899978 | 8.872200000  |
| O | 9.741600000  | 4.513899978 | 5.914800000  |
| O | 9.741600000  | 4.513899978 | 2.957400000  |

|   |              |             |              |
|---|--------------|-------------|--------------|
| O | 9.741600000  | 4.513899978 | 0.000000000  |
| O | 3.247200000  | 4.513899978 | 8.872200000  |
| O | 3.247200000  | 4.513899978 | 5.914800000  |
| O | 3.247200000  | 4.513899978 | 2.957400000  |
| O | 3.247200000  | 4.513899978 | 0.000000000  |
| O | 0.000000000  | 5.227600085 | 2.957400000  |
| O | 0.000000000  | 5.227600085 | 0.000000000  |
| O | 0.000000000  | 5.227600085 | 8.872200000  |
| O | 0.000000000  | 5.227600085 | 5.914800000  |
| O | 6.494400000  | 5.227600085 | 0.000000000  |
| O | 6.494400000  | 5.227600085 | 2.957400000  |
| O | 6.494400000  | 5.227600085 | 8.872200000  |
| O | 6.494400000  | 5.227600085 | 5.914800000  |
| O | 8.474900012  | 6.494389931 | 7.393500000  |
| O | 11.008299988 | 6.494389931 | 7.393500000  |
| O | 8.474900012  | 6.494389931 | 10.350900000 |
| O | 11.008299988 | 6.494389931 | 10.350900000 |
| O | 8.474900012  | 6.494389931 | 1.478700000  |
| O | 11.008299988 | 6.494389931 | 1.478700000  |
| O | 8.474900012  | 6.494389931 | 4.436100000  |
| O | 11.008299988 | 6.494389931 | 4.436100000  |
| O | 1.980500012  | 6.494389931 | 1.478700000  |

|   |             |             |              |
|---|-------------|-------------|--------------|
| O | 4.513899988 | 6.494389931 | 1.478700000  |
| O | 1.980500012 | 6.494389931 | 4.436100000  |
| O | 4.513899988 | 6.494389931 | 4.436100000  |
| O | 1.980500012 | 6.494389931 | 7.393500000  |
| O | 4.513899988 | 6.494389931 | 7.393500000  |
| O | 1.980500012 | 6.494389931 | 10.350900000 |
| O | 4.513899988 | 6.494389931 | 10.350900000 |
| O | 0.000000000 | 7.761090122 | 8.872200000  |
| O | 0.000000000 | 7.761090122 | 5.914800000  |
| O | 6.494400000 | 7.761090122 | 2.957400000  |
| O | 6.494400000 | 7.761090122 | 0.000000000  |
| O | 0.000000000 | 7.761090122 | 2.957400000  |
| O | 0.000000000 | 7.761090122 | 0.000000000  |
| O | 6.494400000 | 7.761090122 | 8.872200000  |
| O | 6.494400000 | 7.761090122 | 5.914800000  |
| O | 3.247200000 | 8.474889884 | 2.957400000  |
| O | 3.247200000 | 8.474889884 | 0.000000000  |
| O | 3.247200000 | 8.474889884 | 8.872200000  |
| O | 3.247200000 | 8.474889884 | 5.914800000  |
| O | 9.741600000 | 8.474889884 | 2.957400000  |
| O | 9.741600000 | 8.474889884 | 0.000000000  |
| O | 9.741600000 | 8.474889884 | 8.872200000  |

|   |              |              |              |
|---|--------------|--------------|--------------|
| O | 9.741600000  | 8.474889884  | 5.914800000  |
| O | 1.268241759  | 9.780425530  | 1.477475045  |
| O | 1.267446065  | 9.779429685  | 4.441146981  |
| O | 5.208666874  | 9.777445853  | 1.478128157  |
| O | 5.207681413  | 9.776868991  | 4.435666209  |
| O | 1.268473219  | 9.780086557  | 7.389324506  |
| O | 1.269041739  | 9.782210407  | 10.353338435 |
| O | 5.208256298  | 9.776896495  | 7.393625512  |
| O | 5.209029001  | 9.777061874  | 10.350706468 |
| O | 7.766574508  | 9.782011452  | 1.479023185  |
| O | 7.765651264  | 9.782061459  | 4.436045584  |
| O | 11.707004558 | 9.775676335  | 1.477819759  |
| O | 11.706430973 | 9.774615481  | 4.439889731  |
| O | 7.766181337  | 9.781897151  | 7.392881903  |
| O | 7.767229403  | 9.782790840  | 10.350272676 |
| O | 11.706652172 | 9.775574893  | 7.392199572  |
| O | 11.707701797 | 9.778294536  | 10.351689271 |
| O | 9.737476446  | 11.063893636 | 2.958480161  |
| O | 9.737176145  | 11.066124286 | 0.000244873  |
| O | 3.233703598  | 11.066382534 | 2.959011192  |
| O | 3.235796483  | 11.067441959 | 0.001118370  |
| O | 3.233695545  | 11.064187246 | 8.872219519  |



|   |              |              |              |
|---|--------------|--------------|--------------|
| O | 3.234996243  | 11.065893899 | 5.915547631  |
| O | 9.738003271  | 11.064434421 | 8.871669916  |
| O | 9.737724532  | 11.065685300 | 5.915498656  |
| O | 6.473597008  | 11.792149939 | 8.870424850  |
| O | -0.019959110 | 11.795048533 | 2.965475358  |
| O | 6.474467388  | 11.791970272 | -0.001678384 |
| O | 6.473501151  | 11.791945983 | 5.912698235  |
| O | -0.020148746 | 11.796086884 | -0.001735284 |
| O | -0.020446320 | 11.804509418 | 5.921023316  |
| O | 6.474361399  | 11.792680723 | 2.955552098  |
| O | -0.017392523 | 11.803760034 | 8.863042943  |
| O | 8.459221751  | 13.091939473 | 1.479913244  |
| O | 8.459107190  | 13.091405117 | 4.437102085  |
| O | 10.988154879 | 13.098866096 | 1.481843953  |
| O | 10.989329716 | 13.101094960 | 4.436387459  |
| O | 1.955133795  | 13.090869690 | 1.483265043  |
| O | 1.954483445  | 13.094922722 | 4.436908080  |
| O | 4.484884178  | 13.102764822 | 1.482213983  |
| O | 4.484734807  | 13.103854608 | 4.435785333  |
| O | 1.955411755  | 13.099366519 | 7.394673615  |
| O | 1.956088601  | 13.093497177 | 10.352337888 |
| O | 4.484755329  | 13.102591228 | 7.396461895  |

|   |              |              |              |
|---|--------------|--------------|--------------|
| O | 4.484525168  | 13.103041287 | 10.352517934 |
| O | 8.459328649  | 13.091805884 | 7.395595259  |
| O | 8.458937426  | 13.090286756 | 10.351192073 |
| O | 10.989503116 | 13.107124323 | 7.395936898  |
| O | 10.989307115 | 13.100402012 | 10.349667001 |
| O | -0.024451156 | 14.410932956 | 2.958252323  |
| O | -0.024123709 | 14.409121290 | 5.912702020  |
| O | -0.021555303 | 14.433187306 | 8.873954803  |
| O | -0.021950682 | 14.381131188 | 0.005976905  |
| O | 6.473179938  | 14.402077151 | 2.962702145  |
| O | 6.471316435  | 14.402017501 | 5.920926668  |
| O | 6.474015897  | 14.401441353 | 8.879297169  |
| O | 6.470557239  | 14.403158007 | 0.006383252  |
| O | 9.709293088  | 15.103475286 | 8.879989437  |
| O | 3.209556639  | 15.097519504 | 8.881777126  |
| O | 9.709878233  | 15.098750380 | 5.915471448  |
| O | 9.709731460  | 15.098119940 | 2.957451104  |
| O | 3.213317286  | 15.112347164 | 2.954839246  |
| O | 9.711085672  | 15.100529899 | -0.004450532 |
| O | 3.212463792  | 15.107825142 | 0.012555701  |
| O | 3.214291576  | 15.101116405 | 5.914456114  |
| O | 1.247785568  | 16.465861608 | 10.358285219 |

|   |              |              |              |
|---|--------------|--------------|--------------|
| O | 5.174936519  | 16.456860783 | 4.435132102  |
| O | 5.175277345  | 16.451932279 | 7.398848162  |
| O | 7.747181840  | 16.456451444 | 1.478194048  |
| O | 7.746613320  | 16.456333929 | 4.442785144  |
| O | 5.175198373  | 16.453550349 | 10.356298438 |
| O | 11.673814927 | 16.445119957 | 1.469800592  |
| O | 11.669525766 | 16.446186525 | 4.430893083  |
| O | 1.249452940  | 16.436746000 | 4.434247721  |
| O | 1.247250949  | 16.450824991 | 1.467799260  |
| O | 5.171013511  | 16.470175031 | 1.488406187  |
| O | 7.747296401  | 16.459951189 | 7.398131407  |
| O | 7.749013130  | 16.470237539 | 10.355622258 |
| O | 1.253206573  | 16.449684127 | 7.394195107  |
| O | 11.673283945 | 16.441033706 | 7.393201066  |
| O | 11.676987442 | 16.462311499 | 10.356250055 |
| O | 3.212886967  | 17.712015531 | 8.882390727  |
| O | 3.200298612  | 17.731751335 | 0.006097804  |
| O | 9.700455898  | 17.719804410 | 2.955792594  |
| O | 9.706209417  | 17.713926496 | 5.920151120  |
| O | 3.172168638  | 17.759331384 | 2.978573446  |
| O | 3.216605921  | 17.713128534 | 5.918083069  |
| O | 9.727685228  | 17.726502075 | 8.866745726  |

|   |              |              |              |
|---|--------------|--------------|--------------|
| O | 9.720614126  | 17.721731092 | 0.004511809  |
| O | 6.448270537  | 18.502257112 | 0.010582642  |
| O | 6.449044799  | 18.503530136 | 5.924285446  |
| O | -0.038654669 | 18.555650549 | -0.007806353 |
| O | 6.468193278  | 18.503090078 | 2.969663391  |
| O | -0.033445121 | 18.483859697 | 5.904047722  |
| O | 6.454954703  | 18.504890315 | 8.876419027  |
| O | -0.038488412 | 18.498301593 | 8.864852162  |
| O | -0.025681325 | 18.443194717 | 2.903893655  |
| O | 1.960007062  | 20.116394692 | 4.553975458  |
| O | 4.419103829  | 19.918054016 | 1.522176028  |
| O | 4.417336443  | 19.922108119 | 4.437054412  |
| O | 1.989988200  | 19.872328014 | 7.393732215  |
| O | 1.974060554  | 19.940736993 | 10.366709432 |
| O | 4.446942854  | 19.937434060 | 7.437801734  |
| O | 4.435242673  | 19.920427542 | 10.369037852 |
| O | 8.461791065  | 19.918976994 | 1.468307815  |
| O | 8.475414888  | 19.940558398 | 4.442666256  |
| O | 10.917833386 | 19.932493768 | 1.488450903  |
| O | 10.911791516 | 19.912362197 | 4.443763333  |
| O | 8.489558002  | 19.932393041 | 7.410528591  |
| O | 8.485999851  | 19.909021759 | 10.340162035 |

|   |              |              |              |
|---|--------------|--------------|--------------|
| O | 10.961374181 | 19.944456410 | 7.351108628  |
| O | 10.942449240 | 19.946214498 | 10.355955853 |
| O | 1.970158199  | 19.967022586 | 1.485783446  |
| O | 6.448371070  | 21.110145843 | 2.964515859  |
| O | 6.447466010  | 21.110046901 | 5.923873421  |
| O | -0.063073743 | 21.022059995 | 3.029140373  |
| O | 0.240541406  | 21.147789355 | 5.810799717  |
| O | -0.028190892 | 21.089859251 | 8.825606281  |
| O | -0.048403802 | 21.171698565 | 0.003615954  |
| O | 6.466280807  | 21.115477614 | 8.884133582  |
| O | 6.448038037  | 21.108225591 | 0.009956619  |
| H | 0.000000000  | 0.932899949  | 9.814800036  |
| H | 0.816399984  | 0.932899949  | 8.400899982  |
| H | 6.457700016  | 0.932899949  | 6.856699960  |
| H | 0.834099951  | 0.932899949  | -0.439200043 |
| H | 0.000000000  | 0.932899949  | 3.900000036  |
| H | 0.816399984  | 0.932899949  | 2.486099982  |
| H | 6.457700016  | 0.932899949  | 0.941899960  |
| H | 0.834099951  | 0.932899949  | 5.475599957  |
| H | 6.494400000  | 0.932899949  | 9.814800036  |
| H | 7.310799984  | 0.932899949  | 8.400899982  |
| H | -0.036699984 | 0.932899949  | 6.856699960  |

|   |              |              |              |
|---|--------------|--------------|--------------|
| H | 7.328499951  | 0.932899949  | -0.439200043 |
| H | 6.494400000  | 0.932899949  | 3.900000036  |
| H | 7.310799984  | 0.932899949  | 2.486099982  |
| H | -0.036699984 | 0.932899949  | 0.941899960  |
| H | 7.328499951  | 0.932899949  | 5.475599957  |
| H | 1.324082169  | 20.893874599 | 5.132859773  |
| H | -0.198235845 | 22.000426626 | 5.656902181  |

2-c:

|    |             |             |              |
|----|-------------|-------------|--------------|
| Ti | 3.247200000 | 3.247194072 | 1.478700000  |
| Ti | 3.247200000 | 3.247194072 | 4.436100000  |
| Ti | 0.000000000 | 3.247194072 | 2.957400000  |
| Ti | 0.000000000 | 3.247194072 | 0.000000000  |
| Ti | 3.247200000 | 3.247194072 | 7.393500000  |
| Ti | 3.247200000 | 3.247194072 | 10.350900000 |
| Ti | 0.000000000 | 3.247194072 | 8.872200000  |
| Ti | 0.000000000 | 3.247194072 | 5.914800000  |
| Ti | 9.741600000 | 3.247194072 | 1.478700000  |
| Ti | 9.741600000 | 3.247194072 | 4.436100000  |
| Ti | 6.494400000 | 3.247194072 | 2.957400000  |
| Ti | 6.494400000 | 3.247194072 | 0.000000000  |
| Ti | 9.741600000 | 3.247194072 | 7.393500000  |
| Ti | 9.741600000 | 3.247194072 | 10.350900000 |

|    |              |             |              |
|----|--------------|-------------|--------------|
| Ti | 6.494400000  | 3.247194072 | 8.872200000  |
| Ti | 6.494400000  | 3.247194072 | 5.914800000  |
| Ti | 0.000000000  | 6.494391717 | 4.436100000  |
| Ti | 0.000000000  | 6.494391717 | 1.478700000  |
| Ti | 3.247200000  | 6.494391717 | 2.957400000  |
| Ti | 3.247200000  | 6.494391717 | 0.000000000  |
| Ti | 0.000000000  | 6.494391717 | 10.350900000 |
| Ti | 0.000000000  | 6.494391717 | 7.393500000  |
| Ti | 3.247200000  | 6.494391717 | 8.872200000  |
| Ti | 3.247200000  | 6.494391717 | 5.914800000  |
| Ti | 6.494400000  | 6.494391717 | 4.436100000  |
| Ti | 6.494400000  | 6.494391717 | 1.478700000  |
| Ti | 9.741600000  | 6.494391717 | 2.957400000  |
| Ti | 9.741600000  | 6.494391717 | 0.000000000  |
| Ti | 6.494400000  | 6.494391717 | 10.350900000 |
| Ti | 6.494400000  | 6.494391717 | 7.393500000  |
| Ti | 9.741600000  | 6.494391717 | 8.872200000  |
| Ti | 9.741600000  | 6.494391717 | 5.914800000  |
| Ti | 3.240475568  | 9.735581429 | 1.482217650  |
| Ti | 3.237785458  | 9.734097306 | 4.439696672  |
| Ti | -0.016992338 | 9.798152856 | 2.969700063  |
| Ti | -0.010902409 | 9.759598153 | 0.011996279  |

|    |              |              |              |
|----|--------------|--------------|--------------|
| Ti | 3.241283342  | 9.734088733  | 7.397448484  |
| Ti | 3.245629524  | 9.734609873  | 10.355041898 |
| Ti | -0.014382238 | 9.797703869  | 8.887515547  |
| Ti | -0.013113233 | 9.739440507  | 5.929014211  |
| Ti | 9.720425658  | 9.735693944  | 1.478789668  |
| Ti | 9.720331879  | 9.734386987  | 4.436566796  |
| Ti | 6.477378437  | 9.833617511  | 2.966355125  |
| Ti | 6.482089865  | 9.835187360  | 0.008503708  |
| Ti | 9.720529569  | 9.735211024  | 7.393973657  |
| Ti | 9.720076779  | 9.734787396  | 10.351145109 |
| Ti | 6.481701370  | 9.834490126  | 8.878790980  |
| Ti | 6.478930469  | 9.835445609  | 5.921744212  |
| Ti | -0.029990360 | 13.116598781 | 1.444774127  |
| Ti | -0.026574565 | 13.073378822 | 4.443425243  |
| Ti | 3.216506816  | 12.984973647 | 2.965206708  |
| Ti | 3.225648463  | 12.987208226 | 5.924886863  |
| Ti | 6.468051180  | 13.168577032 | 1.506239427  |
| Ti | 6.466809970  | 13.169047451 | 4.461604381  |
| Ti | 9.715167662  | 12.985948061 | 2.964255135  |
| Ti | 9.709427392  | 12.987090711 | 5.919683495  |
| Ti | -0.027458063 | 13.055570771 | 7.403032173  |
| Ti | -0.026812260 | 13.136207783 | 10.405093409 |



|    |              |              |              |
|----|--------------|--------------|--------------|
| Ti | 3.216833484  | 12.984504657 | 8.881553665  |
| Ti | 3.223782492  | 12.988145135 | 0.010417974  |
| Ti | 6.469751674  | 13.168607036 | 7.420835130  |
| Ti | 6.465636043  | 13.170090445 | 10.378102757 |
| Ti | 9.716766064  | 12.986353114 | 8.879487507  |
| Ti | 9.707292942  | 12.988684849 | 0.004776201  |
| Ti | 9.686440723  | 16.306075278 | 1.484832465  |
| Ti | 9.685143661  | 16.292671733 | 4.440389886  |
| Ti | 6.445960868  | 16.625916544 | 2.965571651  |
| Ti | -0.044377404 | 16.399403242 | 5.922203437  |
| Ti | 3.205356321  | 16.306369602 | 1.482621867  |
| Ti | 3.210448190  | 16.292990346 | 4.440036536  |
| Ti | -0.047155449 | 16.344810362 | 2.946122251  |
| Ti | 6.445908523  | 16.619770738 | 5.924471171  |
| Ti | 3.206472449  | 16.295064189 | 7.405355270  |
| Ti | 3.203429562  | 16.304575081 | 10.360702835 |
| Ti | -0.051980918 | 16.343907743 | 8.900316593  |
| Ti | 6.442512602  | 16.625971552 | 0.008215421  |
| Ti | 9.685740367  | 16.293858317 | 7.403966712  |
| Ti | 9.682064796  | 16.302720909 | 10.361992498 |
| Ti | 6.442834854  | 16.626350887 | 8.880376501  |
| Ti | -0.050710613 | 16.736206735 | 0.008241209  |

|    |              |              |              |
|----|--------------|--------------|--------------|
| Ti | 6.426998519  | 19.990434231 | 7.397959286  |
| Ti | 6.425829397  | 19.990327788 | 10.352157841 |
| Ti | 3.166755816  | 19.549848901 | 8.883555115  |
| Ti | 3.184202112  | 19.551472328 | 0.009831107  |
| Ti | 6.429928013  | 19.989715922 | 1.482895486  |
| Ti | 6.426272835  | 19.991227549 | 4.437224877  |
| Ti | 3.169790389  | 19.548950569 | 2.964062312  |
| Ti | 3.193470400  | 19.525760382 | 5.923689708  |
| Ti | -0.068918053 | 20.085280251 | 1.473423998  |
| Ti | -0.062479375 | 19.630068002 | 4.289556453  |
| Ti | 9.694007478  | 19.548431215 | 2.965251069  |
| Ti | 9.667041430  | 19.522816781 | 5.922582339  |
| Ti | -0.065780349 | 19.638184067 | 7.559602726  |
| Ti | -0.066522009 | 20.083186048 | 10.374699854 |
| Ti | 9.693371806  | 19.547220699 | 8.879723507  |
| Ti | 9.673733910  | 19.548236904 | 0.006850876  |
| O  | 0.000000000  | 1.266694833  | 2.957400000  |
| O  | 0.000000000  | 1.266694833  | 0.000000000  |
| O  | 0.000000000  | 1.266694833  | 8.872200000  |
| O  | 0.000000000  | 1.266694833  | 5.914800000  |
| O  | 6.494400000  | 1.266694833  | 2.957400000  |
| O  | 6.494400000  | 1.266694833  | 0.000000000  |

|   |              |             |              |
|---|--------------|-------------|--------------|
| O | 6.494400000  | 1.266694833 | 8.872200000  |
| O | 6.494400000  | 1.266694833 | 5.914800000  |
| O | 9.741600000  | 1.980495667 | 8.872200000  |
| O | 9.741600000  | 1.980495667 | 5.914800000  |
| O | 9.741600000  | 1.980495667 | 2.957400000  |
| O | 9.741600000  | 1.980495667 | 0.000000000  |
| O | 3.247200000  | 1.980495667 | 8.872200000  |
| O | 3.247200000  | 1.980495667 | 5.914800000  |
| O | 3.247200000  | 1.980495667 | 2.957400000  |
| O | 3.247200000  | 1.980495667 | 0.000000000  |
| O | 1.266698949  | 3.247194072 | 1.478700000  |
| O | 1.266698949  | 3.247194072 | 4.436100000  |
| O | 5.227599738  | 3.247194072 | 1.478700000  |
| O | 5.227599738  | 3.247194072 | 4.436100000  |
| O | 1.266698949  | 3.247194072 | 7.393500000  |
| O | 1.266698949  | 3.247194072 | 10.350900000 |
| O | 5.227599738  | 3.247194072 | 7.393500000  |
| O | 5.227599738  | 3.247194072 | 10.350900000 |
| O | 7.761098949  | 3.247194072 | 1.478700000  |
| O | 7.761098949  | 3.247194072 | 4.436100000  |
| O | 11.721999738 | 3.247194072 | 1.478700000  |
| O | 11.721999738 | 3.247194072 | 4.436100000  |

|   |              |             |              |
|---|--------------|-------------|--------------|
| O | 7.761098949  | 3.247194072 | 7.393500000  |
| O | 7.761098949  | 3.247194072 | 10.350900000 |
| O | 11.721999738 | 3.247194072 | 7.393500000  |
| O | 11.721999738 | 3.247194072 | 10.350900000 |
| O | 9.741600000  | 4.513896049 | 8.872200000  |
| O | 9.741600000  | 4.513896049 | 5.914800000  |
| O | 9.741600000  | 4.513896049 | 2.957400000  |
| O | 9.741600000  | 4.513896049 | 0.000000000  |
| O | 3.247200000  | 4.513896049 | 8.872200000  |
| O | 3.247200000  | 4.513896049 | 5.914800000  |
| O | 3.247200000  | 4.513896049 | 2.957400000  |
| O | 3.247200000  | 4.513896049 | 0.000000000  |
| O | 0.000000000  | 5.227596870 | 2.957400000  |
| O | 0.000000000  | 5.227596870 | 0.000000000  |
| O | 0.000000000  | 5.227596870 | 8.872200000  |
| O | 0.000000000  | 5.227596870 | 5.914800000  |
| O | 6.494400000  | 5.227596870 | 0.000000000  |
| O | 6.494400000  | 5.227596870 | 2.957400000  |
| O | 6.494400000  | 5.227596870 | 8.872200000  |
| O | 6.494400000  | 5.227596870 | 5.914800000  |
| O | 8.474899752  | 6.494391717 | 7.393500000  |
| O | 11.008298949 | 6.494391717 | 7.393500000  |

|   |              |             |              |
|---|--------------|-------------|--------------|
| O | 8.474899752  | 6.494391717 | 10.350900000 |
| O | 11.008298949 | 6.494391717 | 10.350900000 |
| O | 8.474899752  | 6.494391717 | 1.478700000  |
| O | 11.008298949 | 6.494391717 | 1.478700000  |
| O | 8.474899752  | 6.494391717 | 4.436100000  |
| O | 11.008298949 | 6.494391717 | 4.436100000  |
| O | 1.980499752  | 6.494391717 | 1.478700000  |
| O | 4.513898949  | 6.494391717 | 1.478700000  |
| O | 1.980499752  | 6.494391717 | 4.436100000  |
| O | 4.513898949  | 6.494391717 | 4.436100000  |
| O | 1.980499752  | 6.494391717 | 7.393500000  |
| O | 4.513898949  | 6.494391717 | 7.393500000  |
| O | 1.980499752  | 6.494391717 | 10.350900000 |
| O | 4.513898949  | 6.494391717 | 10.350900000 |
| O | 0.000000000  | 7.761086550 | 8.872200000  |
| O | 0.000000000  | 7.761086550 | 5.914800000  |
| O | 6.494400000  | 7.761086550 | 2.957400000  |
| O | 6.494400000  | 7.761086550 | 0.000000000  |
| O | 0.000000000  | 7.761086550 | 2.957400000  |
| O | 0.000000000  | 7.761086550 | 0.000000000  |
| O | 6.494400000  | 7.761086550 | 8.872200000  |
| O | 6.494400000  | 7.761086550 | 5.914800000  |

|   |              |             |              |
|---|--------------|-------------|--------------|
| O | 3.247200000  | 8.474887384 | 2.957400000  |
| O | 3.247200000  | 8.474887384 | 0.000000000  |
| O | 3.247200000  | 8.474887384 | 8.872200000  |
| O | 3.247200000  | 8.474887384 | 5.914800000  |
| O | 9.741600000  | 8.474887384 | 2.957400000  |
| O | 9.741600000  | 8.474887384 | 0.000000000  |
| O | 9.741600000  | 8.474887384 | 8.872200000  |
| O | 9.741600000  | 8.474887384 | 5.914800000  |
| O | 1.265121979  | 9.783507006 | 1.484408847  |
| O | 1.264748161  | 9.780208715 | 4.444324175  |
| O | 5.205815572  | 9.775345934 | 1.481552235  |
| O | 5.205388760  | 9.774833010 | 4.439692650  |
| O | 1.265875070  | 9.780530901 | 7.395383509  |
| O | 1.265924037  | 9.783490932 | 10.355908771 |
| O | 5.206273168  | 9.774886231 | 7.397020844  |
| O | 5.206865847  | 9.775172340 | 10.353951919 |
| O | 7.763925961  | 9.782822987 | 1.482709643  |
| O | 7.763196900  | 9.782464011 | 4.439017179  |
| O | 11.705693988 | 9.775166268 | 1.483428055  |
| O | 11.705215221 | 9.772544852 | 4.445315968  |
| O | 7.763862316  | 9.782443652 | 7.396036858  |
| O | 7.764503054  | 9.782774767 | 10.354086894 |

|   |              |              |              |
|---|--------------|--------------|--------------|
| O | 11.705473309 | 9.772525921  | 7.395372034  |
| O | 11.705661386 | 9.775146980  | 10.356630613 |
| O | 9.737463067  | 11.065060218 | 2.961231253  |
| O | 9.737712322  | 11.066425040 | 0.002201843  |
| O | 3.232826724  | 11.064528719 | 2.962215948  |
| O | 3.232942584  | 11.066073922 | 0.002899553  |
| O | 3.233768282  | 11.064478713 | 8.873640845  |
| O | 3.231803076  | 11.065851393 | 5.917711974  |
| O | 9.737502423  | 11.065067004 | 8.873319553  |
| O | 9.738400988  | 11.065775669 | 5.917124871  |
| O | 6.467668270  | 11.790397209 | 8.874699476  |
| O | -0.028019959 | 11.799548767 | 2.976044041  |
| O | 6.467745164  | 11.790319698 | 0.002072664  |
| O | 6.467105076  | 11.790302910 | 5.916967419  |
| O | -0.028289606 | 11.793176859 | 0.005560622  |
| O | -0.027075413 | 11.806488249 | 5.919393670  |
| O | 6.466736064  | 11.790587233 | 2.959535716  |
| O | -0.027177765 | 11.798216806 | 8.866464418  |
| O | 8.454248599  | 13.085106433 | 1.483738818  |
| O | 8.454006358  | 13.086612702 | 4.442404349  |
| O | 10.984921187 | 13.100692050 | 1.488607408  |
| O | 10.987368407 | 13.107834059 | 4.441341223  |

|   |              |              |              |
|---|--------------|--------------|--------------|
| O | 1.947390911  | 13.081704558 | 1.489579801  |
| O | 1.946334792  | 13.091673724 | 4.442348986  |
| O | 4.478300935  | 13.103205952 | 1.484291024  |
| O | 4.478402247  | 13.105149064 | 4.442281084  |
| O | 1.946287513  | 13.090919339 | 7.399636014  |
| O | 1.947556518  | 13.083016159 | 10.353308861 |
| O | 4.478820746  | 13.104882958 | 7.399632583  |
| O | 4.477867239  | 13.103584930 | 10.357530373 |
| O | 8.454681256  | 13.086702714 | 7.398552422  |
| O | 8.454038960  | 13.085781879 | 10.356414013 |
| O | 10.987582722 | 13.107307562 | 7.399077302  |
| O | 10.985511269 | 13.101028166 | 10.352972664 |
| O | -0.027317265 | 14.415178157 | 2.965598504  |
| O | -0.027219849 | 14.426596441 | 5.920795951  |
| O | -0.028097112 | 14.414584507 | 8.876501834  |
| O | -0.025263995 | 14.374581042 | 0.009687378  |
| O | 6.468942601  | 14.398147350 | 2.965762817  |
| O | 6.468115475  | 14.398574906 | 5.924689309  |
| O | 6.468008707  | 14.397952681 | 8.883195377  |
| O | 6.468258611  | 14.399431447 | 0.009973181  |
| O | 9.696865923  | 15.098672155 | 8.884546908  |
| O | 3.189563759  | 15.099009700 | 8.885781564  |



|   |              |              |              |
|---|--------------|--------------|--------------|
| O | 9.696609654  | 15.096308274 | 5.921476863  |
| O | 9.697343651  | 15.098017426 | 2.959188281  |
| O | 3.189819898  | 15.099858740 | 2.958664703  |
| O | 9.694196335  | 15.099010771 | 0.008279655  |
| O | 3.191817445  | 15.099363317 | 0.008324608  |
| O | 3.190850169  | 15.097329479 | 5.922854775  |
| O | 1.229719316  | 16.460922745 | 10.370484849 |
| O | 5.160256317  | 16.437520388 | 4.443143817  |
| O | 5.159525697  | 16.438520876 | 7.402761276  |
| O | 7.733649718  | 16.465028284 | 1.486350202  |
| O | 7.733078860  | 16.456029603 | 4.442878716  |
| O | 5.157789484  | 16.447253808 | 10.358984940 |
| O | 11.662100198 | 16.445912918 | 1.474129634  |
| O | 11.659773904 | 16.440553643 | 4.439662839  |
| O | 1.234316702  | 16.456908647 | 4.438169115  |
| O | 1.230785567  | 16.463289842 | 1.473960234  |
| O | 5.158605830  | 16.447438475 | 1.487319638  |
| O | 7.732588143  | 16.455196279 | 7.402386041  |
| O | 7.732706861  | 16.463388783 | 10.358654894 |
| O | 1.233050943  | 16.455648839 | 7.405835907  |
| O | 11.659176160 | 16.440089654 | 7.403617739  |
| O | 11.661292945 | 16.444390218 | 10.371591390 |

|   |              |              |              |
|---|--------------|--------------|--------------|
| O | 3.184128465  | 17.725268699 | 8.878104035  |
| O | 3.188265528  | 17.725466939 | 0.007994799  |
| O | 9.709418040  | 17.723552045 | 2.969199908  |
| O | 9.696379363  | 17.703446549 | 5.922760611  |
| O | 3.186704534  | 17.723973172 | 2.969291351  |
| O | 3.197001275  | 17.706590533 | 5.923113606  |
| O | 9.708265933  | 17.722364032 | 8.877004001  |
| O | 9.707040960  | 17.723143777 | 0.007798664  |
| O | 6.428147249  | 18.494018888 | 0.008741956  |
| O | 6.428590946  | 18.491828243 | 5.924386471  |
| O | -0.066132345 | 18.578637852 | 0.008121375  |
| O | 6.428182188  | 18.494841139 | 2.972965979  |
| O | -0.061466249 | 18.534498487 | 5.922454224  |
| O | 6.427003715  | 18.494682189 | 8.873952200  |
| O | -0.066307824 | 18.460808815 | 8.935533312  |
| O | -0.065836460 | 18.459439349 | 2.907785830  |
| O | 1.928997731  | 19.930706391 | 4.472447037  |
| O | 4.405407529  | 19.917953646 | 1.497333749  |
| O | 4.394345358  | 19.933490328 | 4.441948081  |
| O | 1.927979409  | 19.926655859 | 7.373810814  |
| O | 1.951982582  | 19.943292329 | 10.365756085 |
| O | 4.393799439  | 19.934803714 | 7.406334288  |

|   |              |              |              |
|---|--------------|--------------|--------------|
| O | 4.403677941  | 19.919379190 | 10.349193817 |
| O | 8.455188988  | 19.901748304 | 1.496436356  |
| O | 8.464831873  | 19.920162864 | 4.439962838  |
| O | 10.905640280 | 19.957313812 | 1.481641785  |
| O | 10.932939750 | 19.938288815 | 4.472343528  |
| O | 8.465149320  | 19.921140850 | 7.404535716  |
| O | 8.453850752  | 19.899213686 | 10.347369811 |
| O | 10.933078340 | 19.934231139 | 7.370878966  |
| O | 10.905818356 | 19.955823259 | 10.363784445 |
| O | 1.951511088  | 19.943157668 | 1.483780813  |
| O | 6.435065733  | 21.103402458 | 2.963921777  |
| O | 6.434336282  | 21.100972853 | 5.920153840  |
| O | -0.061211149 | 21.050766263 | 3.033917875  |
| O | -0.070487880 | 21.356138488 | 5.911635582  |
| O | -0.060550798 | 21.051485643 | 8.815078056  |
| O | -0.060614443 | 21.215131051 | 0.008112148  |
| O | 6.435471763  | 21.102890962 | 8.875414221  |
| O | 6.436391889  | 21.099060102 | 0.005140789  |
| H | 0.000000000  | 0.932897449  | 9.814799089  |
| H | 0.816399334  | 0.932897449  | 8.400899272  |
| H | 6.457698847  | 0.932897449  | 6.856699960  |
| H | 0.834099172  | 0.932897449  | -0.439201108 |

|   |              |              |              |
|---|--------------|--------------|--------------|
| H | 0.000000000  | 0.932897449  | 3.899999089  |
| H | 0.816399334  | 0.932897449  | 2.486099272  |
| H | 6.457698847  | 0.932897449  | 0.941899960  |
| H | 0.834099172  | 0.932897449  | 5.475598892  |
| H | 6.494400000  | 0.932897449  | 9.814799089  |
| H | 7.310799334  | 0.932897449  | 8.400899272  |
| H | -0.036701153 | 0.932897449  | 6.856699960  |
| H | 7.328499172  | 0.932897449  | -0.439201108 |
| H | 6.494400000  | 0.932897449  | 3.899999089  |
| H | 7.310799334  | 0.932897449  | 2.486099272  |
| H | -0.036701153 | 0.932897449  | 0.941899960  |
| H | 7.328499172  | 0.932897449  | 5.475598892  |
| H | 0.708618402  | 21.939789025 | 5.867716181  |
| H | 12.117644171 | 21.908337396 | 5.866600295  |

3-a:

|    |             |             |              |
|----|-------------|-------------|--------------|
| Ti | 3.247200000 | 3.247194072 | 1.478700000  |
| Ti | 3.247200000 | 3.247194072 | 4.436100000  |
| Ti | 0.000000000 | 3.247194072 | 2.957400000  |
| Ti | 0.000000000 | 3.247194072 | 0.000000000  |
| Ti | 3.247200000 | 3.247194072 | 7.393500000  |
| Ti | 3.247200000 | 3.247194072 | 10.350900000 |
| Ti | 0.000000000 | 3.247194072 | 8.872200000  |

|    |             |             |              |
|----|-------------|-------------|--------------|
| Ti | 0.000000000 | 3.247194072 | 5.914800000  |
| Ti | 9.741600000 | 3.247194072 | 1.478700000  |
| Ti | 9.741600000 | 3.247194072 | 4.436100000  |
| Ti | 6.494400000 | 3.247194072 | 2.957400000  |
| Ti | 6.494400000 | 3.247194072 | 0.000000000  |
| Ti | 9.741600000 | 3.247194072 | 7.393500000  |
| Ti | 9.741600000 | 3.247194072 | 10.350900000 |
| Ti | 6.494400000 | 3.247194072 | 8.872200000  |
| Ti | 6.494400000 | 3.247194072 | 5.914800000  |
| Ti | 0.000000000 | 6.494391717 | 4.436100000  |
| Ti | 0.000000000 | 6.494391717 | 1.478700000  |
| Ti | 3.247200000 | 6.494391717 | 2.957400000  |
| Ti | 3.247200000 | 6.494391717 | 0.000000000  |
| Ti | 0.000000000 | 6.494391717 | 10.350900000 |
| Ti | 0.000000000 | 6.494391717 | 7.393500000  |
| Ti | 3.247200000 | 6.494391717 | 8.872200000  |
| Ti | 3.247200000 | 6.494391717 | 5.914800000  |
| Ti | 6.494400000 | 6.494391717 | 4.436100000  |
| Ti | 6.494400000 | 6.494391717 | 1.478700000  |
| Ti | 9.741600000 | 6.494391717 | 2.957400000  |
| Ti | 9.741600000 | 6.494391717 | 0.000000000  |
| Ti | 6.494400000 | 6.494391717 | 10.350900000 |

|    |              |              |              |
|----|--------------|--------------|--------------|
| Ti | 6.494400000  | 6.494391717  | 7.393500000  |
| Ti | 9.741600000  | 6.494391717  | 8.872200000  |
| Ti | 9.741600000  | 6.494391717  | 5.914800000  |
| Ti | 3.225825761  | 9.736808019  | 1.478474410  |
| Ti | 3.225629760  | 9.735442840  | 4.436082965  |
| Ti | -0.017343035 | 9.831193979  | 2.967137062  |
| Ti | -0.016207035 | 9.831168976  | 0.009977085  |
| Ti | 3.225996044  | 9.736752297  | 7.394085802  |
| Ti | 3.225785495  | 9.736880528  | 10.351227680 |
| Ti | -0.016303282 | 9.831333997  | 8.881875075  |
| Ti | -0.015559024 | 9.831108254  | 5.924399957  |
| Ti | 9.731162070  | 9.737109487  | 1.480188873  |
| Ti | 9.731213766  | 9.736564058  | 4.437759101  |
| Ti | 6.478018006  | 9.753565218  | 2.963937274  |
| Ti | 6.478087366  | 9.753033363  | 0.006146778  |
| Ti | 9.732328465  | 9.735922545  | 7.395294432  |
| Ti | 9.731699807  | 9.736505479  | 10.352722823 |
| Ti | 6.478607048  | 9.753438059  | 8.878276511  |
| Ti | 6.478267521  | 9.753336260  | 5.921211643  |
| Ti | -0.027145943 | 13.165359824 | 1.510120364  |
| Ti | -0.027176986 | 13.167989812 | 4.467777894  |
| Ti | 3.217682432  | 12.988829868 | 2.963853283  |

|    |              |              |              |
|----|--------------|--------------|--------------|
| Ti | 3.217407979  | 12.989005962 | 5.920579233  |
| Ti | 6.467366800  | 13.065612089 | 1.478793336  |
| Ti | 6.467145731  | 13.065781039 | 4.436508831  |
| Ti | 9.715350544  | 12.989914296 | 2.966695700  |
| Ti | 9.715694748  | 12.989324933 | 5.923450513  |
| Ti | -0.026757188 | 13.166247083 | 7.425731283  |
| Ti | -0.027607565 | 13.167840864 | 10.382207864 |
| Ti | 3.217928830  | 12.991006582 | 8.878840783  |
| Ti | 3.217762963  | 12.991043015 | 0.006177772  |
| Ti | 6.467195998  | 13.065731033 | 7.393820819  |
| Ti | 6.467586441  | 13.065482786 | 10.351138485 |
| Ti | 9.715095964  | 12.989781064 | 8.881241718  |
| Ti | 9.715451987  | 12.990251126 | 0.008522635  |
| Ti | 9.698969330  | 16.304503643 | 1.484941770  |
| Ti | 9.699634486  | 16.305186232 | 4.443211482  |
| Ti | 6.443982804  | 16.345260778 | 2.965628906  |
| Ti | -0.052744659 | 16.612970917 | 5.925604920  |
| Ti | 3.179572644  | 16.304621515 | 1.489955391  |
| Ti | 3.180736440  | 16.304735459 | 4.447654917  |
| Ti | -0.053529702 | 16.612160096 | 2.968064739  |
| Ti | 6.444387924  | 16.345525813 | 5.923538171  |
| Ti | 3.180290535  | 16.304509001 | 7.404501765  |

|    |              |              |              |
|----|--------------|--------------|--------------|
| Ti | 3.178727982  | 16.305463054 | 10.362163080 |
| Ti | -0.054240709 | 16.613948188 | 8.882466910  |
| Ti | 6.443404023  | 16.345195055 | 0.009520107  |
| Ti | 9.699097789  | 16.304332549 | 7.399395636  |
| Ti | 9.698593174  | 16.304564365 | 10.357971617 |
| Ti | 6.443381422  | 16.345600823 | 8.881947590  |
| Ti | -0.053912612 | 16.613008064 | 0.010031383  |
| Ti | 6.423971479  | 19.758144098 | 7.414963035  |
| Ti | 6.421815598  | 19.758438065 | 10.372301403 |
| Ti | 3.189843927  | 19.550362540 | 8.887077615  |
| Ti | 3.190180986  | 19.550433621 | 0.015736207  |
| Ti | 6.422421785  | 19.758223037 | 1.500652307  |
| Ti | 6.423826264  | 19.758386987 | 4.457588942  |
| Ti | 3.190997722  | 19.550030710 | 2.973448982  |
| Ti | 3.190778082  | 19.550043926 | 5.930848745  |
| Ti | -0.055526600 | 19.981720230 | 1.489803263  |
| Ti | -0.055496596 | 19.981350538 | 4.446850977  |
| Ti | 9.682911796  | 19.553332215 | 2.971381049  |
| Ti | 9.682703715  | 19.553502952 | 5.928850016  |
| Ti | -0.056046023 | 19.982307092 | 7.403254925  |
| Ti | -0.055424898 | 19.982498189 | 10.361025664 |
| Ti | 9.682577464  | 19.552830721 | 8.885958061  |



|    |             |              |             |
|----|-------------|--------------|-------------|
| Ti | 9.683028565 | 19.552914660 | 0.013501951 |
| O  | 0.000000000 | 1.266694833  | 2.957400000 |
| O  | 0.000000000 | 1.266694833  | 0.000000000 |
| O  | 0.000000000 | 1.266694833  | 8.872200000 |
| O  | 0.000000000 | 1.266694833  | 5.914800000 |
| O  | 6.494400000 | 1.266694833  | 2.957400000 |
| O  | 6.494400000 | 1.266694833  | 0.000000000 |
| O  | 6.494400000 | 1.266694833  | 8.872200000 |
| O  | 6.494400000 | 1.266694833  | 5.914800000 |
| O  | 9.741600000 | 1.980495667  | 8.872200000 |
| O  | 9.741600000 | 1.980495667  | 5.914800000 |
| O  | 9.741600000 | 1.980495667  | 2.957400000 |
| O  | 9.741600000 | 1.980495667  | 0.000000000 |
| O  | 3.247200000 | 1.980495667  | 8.872200000 |
| O  | 3.247200000 | 1.980495667  | 5.914800000 |
| O  | 3.247200000 | 1.980495667  | 2.957400000 |
| O  | 3.247200000 | 1.980495667  | 0.000000000 |
| O  | 1.266698949 | 3.247194072  | 1.478700000 |
| O  | 1.266698949 | 3.247194072  | 4.436100000 |
| O  | 5.227599738 | 3.247194072  | 1.478700000 |
| O  | 5.227599738 | 3.247194072  | 4.436100000 |
| O  | 1.266698949 | 3.247194072  | 7.393500000 |

|   |              |             |              |
|---|--------------|-------------|--------------|
| O | 1.266698949  | 3.247194072 | 10.350900000 |
| O | 5.227599738  | 3.247194072 | 7.393500000  |
| O | 5.227599738  | 3.247194072 | 10.350900000 |
| O | 7.761098949  | 3.247194072 | 1.478700000  |
| O | 7.761098949  | 3.247194072 | 4.436100000  |
| O | 11.721999738 | 3.247194072 | 1.478700000  |
| O | 11.721999738 | 3.247194072 | 4.436100000  |
| O | 7.761098949  | 3.247194072 | 7.393500000  |
| O | 7.761098949  | 3.247194072 | 10.350900000 |
| O | 11.721999738 | 3.247194072 | 7.393500000  |
| O | 11.721999738 | 3.247194072 | 10.350900000 |
| O | 9.741600000  | 4.513896049 | 8.872200000  |
| O | 9.741600000  | 4.513896049 | 5.914800000  |
| O | 9.741600000  | 4.513896049 | 2.957400000  |
| O | 9.741600000  | 4.513896049 | 0.000000000  |
| O | 3.247200000  | 4.513896049 | 8.872200000  |
| O | 3.247200000  | 4.513896049 | 5.914800000  |
| O | 3.247200000  | 4.513896049 | 2.957400000  |
| O | 3.247200000  | 4.513896049 | 0.000000000  |
| O | 0.000000000  | 5.227596870 | 2.957400000  |
| O | 0.000000000  | 5.227596870 | 0.000000000  |
| O | 0.000000000  | 5.227596870 | 8.872200000  |

|   |              |             |              |
|---|--------------|-------------|--------------|
| O | 0.000000000  | 5.227596870 | 5.914800000  |
| O | 6.494400000  | 5.227596870 | 0.000000000  |
| O | 6.494400000  | 5.227596870 | 2.957400000  |
| O | 6.494400000  | 5.227596870 | 8.872200000  |
| O | 6.494400000  | 5.227596870 | 5.914800000  |
| O | 8.474899752  | 6.494391717 | 7.393500000  |
| O | 11.008298949 | 6.494391717 | 7.393500000  |
| O | 8.474899752  | 6.494391717 | 10.350900000 |
| O | 11.008298949 | 6.494391717 | 10.350900000 |
| O | 8.474899752  | 6.494391717 | 1.478700000  |
| O | 11.008298949 | 6.494391717 | 1.478700000  |
| O | 8.474899752  | 6.494391717 | 4.436100000  |
| O | 11.008298949 | 6.494391717 | 4.436100000  |
| O | 1.980499752  | 6.494391717 | 1.478700000  |
| O | 4.513898949  | 6.494391717 | 1.478700000  |
| O | 1.980499752  | 6.494391717 | 4.436100000  |
| O | 4.513898949  | 6.494391717 | 4.436100000  |
| O | 1.980499752  | 6.494391717 | 7.393500000  |
| O | 4.513898949  | 6.494391717 | 7.393500000  |
| O | 1.980499752  | 6.494391717 | 10.350900000 |
| O | 4.513898949  | 6.494391717 | 10.350900000 |
| O | 0.000000000  | 7.761086550 | 8.872200000  |

|   |             |             |              |
|---|-------------|-------------|--------------|
| O | 0.000000000 | 7.761086550 | 5.914800000  |
| O | 6.494400000 | 7.761086550 | 2.957400000  |
| O | 6.494400000 | 7.761086550 | 0.000000000  |
| O | 0.000000000 | 7.761086550 | 2.957400000  |
| O | 0.000000000 | 7.761086550 | 0.000000000  |
| O | 6.494400000 | 7.761086550 | 8.872200000  |
| O | 6.494400000 | 7.761086550 | 5.914800000  |
| O | 3.247200000 | 8.474887384 | 2.957400000  |
| O | 3.247200000 | 8.474887384 | 0.000000000  |
| O | 3.247200000 | 8.474887384 | 8.872200000  |
| O | 3.247200000 | 8.474887384 | 5.914800000  |
| O | 9.741600000 | 8.474887384 | 2.957400000  |
| O | 9.741600000 | 8.474887384 | 0.000000000  |
| O | 9.741600000 | 8.474887384 | 8.872200000  |
| O | 9.741600000 | 8.474887384 | 5.914800000  |
| O | 1.267676097 | 9.784663586 | 1.482469502  |
| O | 1.267938211 | 9.784656442 | 4.439261579  |
| O | 5.209556087 | 9.774593693 | 1.482055348  |
| O | 5.209797029 | 9.774613695 | 4.439235909  |
| O | 1.267927300 | 9.784781816 | 7.397311024  |
| O | 1.267839626 | 9.784863969 | 10.354258778 |
| O | 5.209709744 | 9.774750142 | 7.396592257  |

|   |              |              |              |
|---|--------------|--------------|--------------|
| O | 5.209556606  | 9.774687991  | 10.354064181 |
| O | 7.758352987  | 9.782350782  | 1.481861342  |
| O | 7.758533012  | 9.782353283  | 4.439295412  |
| O | 11.699403642 | 9.777811615  | 1.482332988  |
| O | 11.699494694 | 9.777786969  | 4.440331093  |
| O | 7.758509892  | 9.782381501  | 7.396717296  |
| O | 7.758503008  | 9.782286845  | 10.354231452 |
| O | 11.699793047 | 9.777874123  | 7.397294462  |
| O | 11.699741871 | 9.777938775  | 10.355113349 |
| O | 9.725159816  | 11.069674752 | 2.959950817  |
| O | 9.724949917  | 11.069701541 | 0.002552354  |
| O | 3.242608719  | 11.068734629 | 2.959639816  |
| O | 3.242315432  | 11.069247910 | 0.002193563  |
| O | 3.242601185  | 11.069193975 | 8.874370732  |
| O | 3.242485066  | 11.068817497 | 5.916825937  |
| O | 9.725387640  | 11.069490085 | 8.874910043  |
| O | 9.725167479  | 11.069272913 | 5.917455863  |
| O | 6.466183650  | 11.795036389 | 8.876570446  |
| O | -0.027657052 | 11.795126044 | 2.959440961  |
| O | 6.466169233  | 11.795016743 | 0.004315320  |
| O | 6.466286262  | 11.794803501 | 5.919208774  |
| O | -0.027336878 | 11.795314997 | 0.002145061  |

|   |              |              |              |
|---|--------------|--------------|--------------|
| O | -0.027127628 | 11.794975667 | 5.916953224  |
| O | 6.466032461  | 11.794771711 | 2.961711653  |
| O | -0.027388963 | 11.795056749 | 8.874359967  |
| O | 8.435624868  | 13.092281661 | 1.484761724  |
| O | 8.435859576  | 13.092256657 | 4.442223001  |
| O | 10.970807557 | 13.108234112 | 1.484275527  |
| O | 10.970710011 | 13.108271259 | 4.441890589  |
| O | 1.959942768  | 13.093454315 | 1.484222294  |
| O | 1.959968486  | 13.093451457 | 4.441440000  |
| O | 4.495327303  | 13.107237195 | 1.484323319  |
| O | 4.495397573  | 13.107048956 | 4.441902655  |
| O | 1.959889644  | 13.093411809 | 7.399179864  |
| O | 1.959965758  | 13.093634338 | 10.356208296 |
| O | 4.495327303  | 13.107100391 | 7.399272727  |
| O | 4.495413029  | 13.107048599 | 10.356780731 |
| O | 8.435909712  | 13.092248799 | 7.399938142  |
| O | 8.435697216  | 13.092324166 | 10.357025485 |
| O | 10.970973554 | 13.108051588 | 7.399622055  |
| O | 10.970591294 | 13.108190535 | 10.356902694 |
| O | -0.031028555 | 14.403481621 | 2.968500778  |
| O | -0.030589144 | 14.403630569 | 5.925512413  |
| O | -0.030841126 | 14.403067996 | 8.882695576  |

|   |              |              |              |
|---|--------------|--------------|--------------|
| O | -0.030896588 | 14.402964053 | 0.010814620  |
| O | 6.460852397  | 14.423856081 | 2.963613261  |
| O | 6.460852527  | 14.423991813 | 5.920899460  |
| O | 6.460644836  | 14.424041463 | 8.878551785  |
| O | 6.460501440  | 14.423864654 | 0.006331202  |
| O | 9.682103633  | 15.103298834 | 8.880118498  |
| O | 3.208739774  | 15.102262269 | 8.882505948  |
| O | 9.682418221  | 15.102738046 | 5.922427371  |
| O | 9.682432509  | 15.102721973 | 2.965030920  |
| O | 3.208391544  | 15.102148683 | 2.967422392  |
| O | 9.681838401  | 15.102971291 | 0.007690660  |
| O | 3.208748086  | 15.102408717 | 0.009779767  |
| O | 3.208381153  | 15.102263341 | 5.924940688  |
| O | 1.235592332  | 16.452818824 | 10.361299638 |
| O | 5.164182312  | 16.466221298 | 4.445366717  |
| O | 5.164011639  | 16.466207367 | 7.402728034  |
| O | 7.723330506  | 16.460669855 | 1.487435805  |
| O | 7.723765761  | 16.460496261 | 4.445007689  |
| O | 5.163735237  | 16.466283806 | 10.360113247 |
| O | 11.648354801 | 16.451544014 | 1.489081420  |
| O | 11.648788107 | 16.451659744 | 4.446242699  |
| O | 1.235712998  | 16.453042425 | 4.446401334  |

|   |              |              |              |
|---|--------------|--------------|--------------|
| O | 1.235347103  | 16.453076358 | 1.488807683  |
| O | 5.163512220  | 16.466306666 | 1.488323498  |
| O | 7.723432338  | 16.460590916 | 7.402546095  |
| O | 7.723053845  | 16.460681285 | 10.360012814 |
| O | 1.235838470  | 16.452971702 | 7.404022547  |
| O | 11.648036186 | 16.451398995 | 7.403313836  |
| O | 11.647489617 | 16.451145390 | 10.361182643 |
| O | 3.198516679  | 17.729779648 | 8.883641944  |
| O | 3.198528758  | 17.729873589 | 0.011238357  |
| O | 9.667720355  | 17.732082807 | 2.966831385  |
| O | 9.667823226  | 17.732224255 | 5.924271724  |
| O | 3.198588637  | 17.729567834 | 2.968668404  |
| O | 3.198569413  | 17.729739643 | 5.926211542  |
| O | 9.667816342  | 17.731920643 | 8.881759500  |
| O | 9.667718407  | 17.732292478 | 0.009418846  |
| O | 6.466704501  | 18.532677176 | 0.017062187  |
| O | 6.468808037  | 18.532842912 | 5.932470228  |
| O | -0.051612945 | 18.490611298 | 0.012696946  |
| O | 6.468614894  | 18.533068656 | 2.974906152  |
| O | -0.051306020 | 18.491229593 | 5.927703609  |
| O | 6.467433173  | 18.532614311 | 8.889963682  |
| O | -0.052030405 | 18.490356979 | 8.885307552  |



|   |              |              |              |
|---|--------------|--------------|--------------|
| O | -0.051360183 | 18.491455694 | 2.970218318  |
| O | 1.986122993  | 19.938225235 | 4.450122926  |
| O | 4.471152419  | 19.918403347 | 1.493444532  |
| O | 4.471683011  | 19.916829569 | 4.450881795  |
| O | 1.985421598  | 19.938179872 | 7.407338621  |
| O | 1.986256258  | 19.938200232 | 10.364680774 |
| O | 4.471581569  | 19.917780766 | 7.408321779  |
| O | 4.470431800  | 19.919809961 | 10.366028639 |
| O | 8.427933160  | 20.011520927 | 1.492293630  |
| O | 8.428355816  | 20.011390553 | 4.449886689  |
| O | 10.898907405 | 19.928424306 | 1.491759169  |
| O | 10.899185366 | 19.929305136 | 4.448945644  |
| O | 8.427934070  | 20.011582721 | 7.407837357  |
| O | 8.427620650  | 20.011174096 | 10.364909795 |
| O | 10.899586070 | 19.928694341 | 7.406222380  |
| O | 10.898734914 | 19.928615402 | 10.364263189 |
| O | 1.986118707  | 19.938162727 | 1.492585584  |
| O | 6.430565503  | 21.185566099 | 2.973881472  |
| O | 6.430597326  | 21.185392148 | 5.931534980  |
| O | -0.056364508 | 21.094758109 | 2.968579090  |
| O | -0.056704295 | 21.094768467 | 5.927138864  |
| O | -0.056659224 | 21.095747167 | 8.885045289  |

|   |              |              |              |
|---|--------------|--------------|--------------|
| O | -0.056300343 | 21.095539283 | 0.011344350  |
| O | 6.431100772  | 21.185792558 | 8.889040264  |
| O | 6.431238063  | 21.185944006 | 0.016791644  |
| H | 0.000000000  | 0.932897449  | 9.814799089  |
| H | 0.816399334  | 0.932897449  | 8.400899272  |
| H | 6.457698847  | 0.932897449  | 6.856699960  |
| H | 0.834099172  | 0.932897449  | -0.439201108 |
| H | 0.000000000  | 0.932897449  | 3.899999089  |
| H | 0.816399334  | 0.932897449  | 2.486099272  |
| H | 6.457698847  | 0.932897449  | 0.941899960  |
| H | 0.834099172  | 0.932897449  | 5.475598892  |
| H | 6.494400000  | 0.932897449  | 9.814799089  |
| H | 7.310799334  | 0.932897449  | 8.400899272  |
| H | -0.036701153 | 0.932897449  | 6.856699960  |
| H | 7.328499172  | 0.932897449  | -0.439201108 |
| H | 6.494400000  | 0.932897449  | 3.899999089  |
| H | 7.310799334  | 0.932897449  | 2.486099272  |
| H | -0.036701153 | 0.932897449  | 0.941899960  |
| H | 7.328499172  | 0.932897449  | 5.475598892  |
| H | 7.226991440  | 21.746672248 | 0.017098267  |
| H | 7.226519167  | 21.747458066 | 8.890136631  |
| H | 7.224937651  | 21.748912899 | 2.973269763  |

|   |             |              |             |
|---|-------------|--------------|-------------|
| H | 7.224251323 | 21.749379032 | 5.931937660 |
|---|-------------|--------------|-------------|

TS3-1:

|    |             |             |              |
|----|-------------|-------------|--------------|
| Ti | 3.247200000 | 3.247190143 | 1.478700000  |
| Ti | 3.247200000 | 3.247190143 | 4.436100000  |
| Ti | 0.000000000 | 3.247190143 | 2.957400000  |
| Ti | 0.000000000 | 3.247190143 | 0.000000000  |
| Ti | 3.247200000 | 3.247190143 | 7.393500000  |
| Ti | 3.247200000 | 3.247190143 | 10.350900000 |
| Ti | 0.000000000 | 3.247190143 | 8.872200000  |
| Ti | 0.000000000 | 3.247190143 | 5.914800000  |
| Ti | 9.741600000 | 3.247190143 | 1.478700000  |
| Ti | 9.741600000 | 3.247190143 | 4.436100000  |
| Ti | 6.494400000 | 3.247190143 | 2.957400000  |
| Ti | 6.494400000 | 3.247190143 | 0.000000000  |
| Ti | 9.741600000 | 3.247190143 | 7.393500000  |
| Ti | 9.741600000 | 3.247190143 | 10.350900000 |
| Ti | 6.494400000 | 3.247190143 | 8.872200000  |
| Ti | 6.494400000 | 3.247190143 | 5.914800000  |
| Ti | 0.000000000 | 6.494389931 | 4.436100000  |
| Ti | 0.000000000 | 6.494389931 | 1.478700000  |
| Ti | 3.247200000 | 6.494389931 | 2.957400000  |
| Ti | 3.247200000 | 6.494389931 | 0.000000000  |

|    |              |             |              |
|----|--------------|-------------|--------------|
| Ti | 0.000000000  | 6.494389931 | 10.350900000 |
| Ti | 0.000000000  | 6.494389931 | 7.393500000  |
| Ti | 3.247200000  | 6.494389931 | 8.872200000  |
| Ti | 3.247200000  | 6.494389931 | 5.914800000  |
| Ti | 6.494400000  | 6.494389931 | 4.436100000  |
| Ti | 6.494400000  | 6.494389931 | 1.478700000  |
| Ti | 9.741600000  | 6.494389931 | 2.957400000  |
| Ti | 9.741600000  | 6.494389931 | 0.000000000  |
| Ti | 6.494400000  | 6.494389931 | 10.350900000 |
| Ti | 6.494400000  | 6.494389931 | 7.393500000  |
| Ti | 9.741600000  | 6.494389931 | 8.872200000  |
| Ti | 9.741600000  | 6.494389931 | 5.914800000  |
| Ti | 3.226517284  | 9.737743142 | 1.478796056  |
| Ti | 3.225740424  | 9.735501419 | 4.436386986  |
| Ti | -0.013076085 | 9.836817932 | 2.959219747  |
| Ti | -0.012392224 | 9.837029745 | -0.000052997 |
| Ti | 3.226212048  | 9.737784933 | 7.393786868  |
| Ti | 3.226191006  | 9.736162934 | 10.351136355 |
| Ti | -0.014762161 | 9.836597188 | 8.871376068  |
| Ti | -0.017794786 | 9.835803155 | 5.916328029  |
| Ti | 9.739555433  | 9.735431052 | 1.482379715  |
| Ti | 9.733608771  | 9.739790553 | 4.439105665  |

|    |              |              |              |
|----|--------------|--------------|--------------|
| Ti | 6.482643707  | 9.757920790  | 2.960488945  |
| Ti | 6.481486665  | 9.759350263  | 0.006963376  |
| Ti | 9.730157257  | 9.739332636  | 7.393842704  |
| Ti | 9.737136529  | 9.736201153  | 10.351261276 |
| Ti | 6.480387683  | 9.755208291  | 8.880462857  |
| Ti | 6.476456882  | 9.748534558  | 5.919475649  |
| Ti | -0.034105082 | 13.174932866 | 1.503768460  |
| Ti | -0.033856087 | 13.174161336 | 4.461712740  |
| Ti | 3.212241554  | 12.989855002 | 2.958748220  |
| Ti | 3.212097898  | 12.989827856 | 5.915794751  |
| Ti | 6.459701330  | 13.104500050 | 1.473564061  |
| Ti | 6.461405461  | 13.056152633 | 4.425859588  |
| Ti | 9.709168525  | 12.994580265 | 2.960497699  |
| Ti | 9.709128390  | 12.998592578 | 5.918053140  |
| Ti | -0.034196523 | 13.175100031 | 7.419116881  |
| Ti | -0.035507872 | 13.176600942 | 10.376682731 |
| Ti | 3.211724080  | 12.990429721 | 8.873638124  |
| Ti | 3.210704200  | 12.991245185 | 0.000552561  |
| Ti | 6.459865898  | 13.045106183 | 7.401491250  |
| Ti | 6.460147106  | 13.084626370 | 10.372758262 |
| Ti | 9.707810286  | 12.994889949 | 8.873989700  |
| Ti | 9.708912126  | 12.988333731 | 0.002399161  |

|    |              |              |              |
|----|--------------|--------------|--------------|
| Ti | 9.706027573  | 16.297841697 | 1.479143965  |
| Ti | 9.703858834  | 16.321894497 | 4.442008057  |
| Ti | 6.443461433  | 16.367249736 | 2.962179158  |
| Ti | -0.040266969 | 16.634729130 | 5.918482081  |
| Ti | 3.178096077  | 16.305736662 | 1.486041568  |
| Ti | 3.187846769  | 16.305476985 | 4.444930915  |
| Ti | -0.050936618 | 16.632368106 | 2.960958580  |
| Ti | 6.454734153  | 16.321673754 | 5.921862035  |
| Ti | 3.192848496  | 16.303909993 | 7.402540062  |
| Ti | 3.185041058  | 16.310903768 | 10.358442080 |
| Ti | -0.047505237 | 16.639462251 | 8.873126139  |
| Ti | 6.446313644  | 16.416148654 | 0.012449589  |
| Ti | 9.704072889  | 16.326929086 | 7.393836789  |
| Ti | 9.705319944  | 16.306103853 | 10.348467243 |
| Ti | 6.447952831  | 16.334197540 | 8.881112657  |
| Ti | -0.049393289 | 16.643679233 | 0.000314431  |
| Ti | 6.437727787  | 19.768462953 | 7.429186354  |
| Ti | 6.451545013  | 19.708860486 | 10.411848583 |
| Ti | 3.208855634  | 19.550396473 | 8.891431262  |
| Ti | 3.246624856  | 19.560345636 | 0.001979329  |
| Ti | 6.468138205  | 19.913148372 | 1.611412379  |
| Ti | 6.265611250  | 19.699306375 | 4.460526941  |

|    |              |              |              |
|----|--------------|--------------|--------------|
| Ti | 3.150583591  | 19.550085003 | 2.936364842  |
| Ti | 3.141589886  | 19.548840554 | 5.951462178  |
| Ti | -0.022120706 | 20.012220662 | 1.473022975  |
| Ti | -0.050073383 | 19.999670800 | 4.437598810  |
| Ti | 9.787084440  | 19.550844032 | 2.909299900  |
| Ti | 9.677544044  | 19.596513597 | 5.926856492  |
| Ti | -0.050965843 | 20.002732273 | 7.394303230  |
| Ti | -0.032573962 | 20.008909513 | 10.351510526 |
| Ti | 9.696240902  | 19.565652404 | 8.871853984  |
| Ti | 9.686241475  | 19.545328308 | -0.021130505 |
| O  | 0.000000000  | 1.266689833  | 2.957400000  |
| O  | 0.000000000  | 1.266689833  | 0.000000000  |
| O  | 0.000000000  | 1.266689833  | 8.872200000  |
| O  | 0.000000000  | 1.266689833  | 5.914800000  |
| O  | 6.494400000  | 1.266689833  | 2.957400000  |
| O  | 6.494400000  | 1.266689833  | 0.000000000  |
| O  | 6.494400000  | 1.266689833  | 8.872200000  |
| O  | 6.494400000  | 1.266689833  | 5.914800000  |
| O  | 9.741600000  | 1.980499953  | 8.872200000  |
| O  | 9.741600000  | 1.980499953  | 5.914800000  |
| O  | 9.741600000  | 1.980499953  | 2.957400000  |
| O  | 9.741600000  | 1.980499953  | 0.000000000  |

|   |              |             |              |
|---|--------------|-------------|--------------|
| O | 3.247200000  | 1.980499953 | 8.872200000  |
| O | 3.247200000  | 1.980499953 | 5.914800000  |
| O | 3.247200000  | 1.980499953 | 2.957400000  |
| O | 3.247200000  | 1.980499953 | 0.000000000  |
| O | 1.266699988  | 3.247190143 | 1.478700000  |
| O | 1.266699988  | 3.247190143 | 4.436100000  |
| O | 5.227599998  | 3.247190143 | 1.478700000  |
| O | 5.227599998  | 3.247190143 | 4.436100000  |
| O | 1.266699988  | 3.247190143 | 7.393500000  |
| O | 1.266699988  | 3.247190143 | 10.350900000 |
| O | 5.227599998  | 3.247190143 | 7.393500000  |
| O | 5.227599998  | 3.247190143 | 10.350900000 |
| O | 7.761099988  | 3.247190143 | 1.478700000  |
| O | 7.761099988  | 3.247190143 | 4.436100000  |
| O | 11.721999998 | 3.247190143 | 1.478700000  |
| O | 11.721999998 | 3.247190143 | 4.436100000  |
| O | 7.761099988  | 3.247190143 | 7.393500000  |
| O | 7.761099988  | 3.247190143 | 10.350900000 |
| O | 11.721999998 | 3.247190143 | 7.393500000  |
| O | 11.721999998 | 3.247190143 | 10.350900000 |
| O | 9.741600000  | 4.513899978 | 8.872200000  |
| O | 9.741600000  | 4.513899978 | 5.914800000  |



|   |              |             |              |
|---|--------------|-------------|--------------|
| O | 9.741600000  | 4.513899978 | 2.957400000  |
| O | 9.741600000  | 4.513899978 | 0.000000000  |
| O | 3.247200000  | 4.513899978 | 8.872200000  |
| O | 3.247200000  | 4.513899978 | 5.914800000  |
| O | 3.247200000  | 4.513899978 | 2.957400000  |
| O | 3.247200000  | 4.513899978 | 0.000000000  |
| O | 0.000000000  | 5.227600085 | 2.957400000  |
| O | 0.000000000  | 5.227600085 | 0.000000000  |
| O | 0.000000000  | 5.227600085 | 8.872200000  |
| O | 0.000000000  | 5.227600085 | 5.914800000  |
| O | 6.494400000  | 5.227600085 | 0.000000000  |
| O | 6.494400000  | 5.227600085 | 2.957400000  |
| O | 6.494400000  | 5.227600085 | 8.872200000  |
| O | 6.494400000  | 5.227600085 | 5.914800000  |
| O | 8.474900012  | 6.494389931 | 7.393500000  |
| O | 11.008299988 | 6.494389931 | 7.393500000  |
| O | 8.474900012  | 6.494389931 | 10.350900000 |
| O | 11.008299988 | 6.494389931 | 10.350900000 |
| O | 8.474900012  | 6.494389931 | 1.478700000  |
| O | 11.008299988 | 6.494389931 | 1.478700000  |
| O | 8.474900012  | 6.494389931 | 4.436100000  |
| O | 11.008299988 | 6.494389931 | 4.436100000  |

|   |             |             |              |
|---|-------------|-------------|--------------|
| O | 1.980500012 | 6.494389931 | 1.478700000  |
| O | 4.513899988 | 6.494389931 | 1.478700000  |
| O | 1.980500012 | 6.494389931 | 4.436100000  |
| O | 4.513899988 | 6.494389931 | 4.436100000  |
| O | 1.980500012 | 6.494389931 | 7.393500000  |
| O | 4.513899988 | 6.494389931 | 7.393500000  |
| O | 1.980500012 | 6.494389931 | 10.350900000 |
| O | 4.513899988 | 6.494389931 | 10.350900000 |
| O | 0.000000000 | 7.761090122 | 8.872200000  |
| O | 0.000000000 | 7.761090122 | 5.914800000  |
| O | 6.494400000 | 7.761090122 | 2.957400000  |
| O | 6.494400000 | 7.761090122 | 0.000000000  |
| O | 0.000000000 | 7.761090122 | 2.957400000  |
| O | 0.000000000 | 7.761090122 | 0.000000000  |
| O | 6.494400000 | 7.761090122 | 8.872200000  |
| O | 6.494400000 | 7.761090122 | 5.914800000  |
| O | 3.247200000 | 8.474889884 | 2.957400000  |
| O | 3.247200000 | 8.474889884 | 0.000000000  |
| O | 3.247200000 | 8.474889884 | 8.872200000  |
| O | 3.247200000 | 8.474889884 | 5.914800000  |
| O | 9.741600000 | 8.474889884 | 2.957400000  |
| O | 9.741600000 | 8.474889884 | 0.000000000  |

|   |              |              |              |
|---|--------------|--------------|--------------|
| O | 9.741600000  | 8.474889884  | 8.872200000  |
| O | 9.741600000  | 8.474889884  | 5.914800000  |
| O | 1.268392559  | 9.786600983  | 1.478984502  |
| O | 1.267745587  | 9.786436676  | 4.436533082  |
| O | 5.210247351  | 9.776991150  | 1.480940526  |
| O | 5.209836775  | 9.777683384  | 4.437398535  |
| O | 1.267473991  | 9.786213075  | 7.393077802  |
| O | 1.268276829  | 9.786753860  | 10.350696649 |
| O | 5.209539072  | 9.776423933  | 7.396490996  |
| O | 5.210165911  | 9.778375261  | 10.354156334 |
| O | 7.758824610  | 9.782991938  | 1.480663832  |
| O | 7.757660034  | 9.783643452  | 4.438994348  |
| O | 11.700114260 | 9.780636272  | 1.478755717  |
| O | 11.698801482 | 9.780329446  | 4.435483914  |
| O | 7.757085800  | 9.782726546  | 7.395380906  |
| O | 7.758194524  | 9.783527365  | 10.353818481 |
| O | 11.698365188 | 9.780406599  | 7.393592034  |
| O | 11.699638090 | 9.780050480  | 10.351415652 |
| O | 9.720948977  | 11.072592992 | 2.958118766  |
| O | 9.720926636  | 11.071205667 | 0.001270972  |
| O | 3.240682999  | 11.069579739 | 2.957961315  |
| O | 3.240644812  | 11.070114095 | 0.001153386  |

|   |              |              |              |
|---|--------------|--------------|--------------|
| O | 3.240628447  | 11.069303275 | 8.872829571  |
| O | 3.240287880  | 11.069122537 | 5.915873654  |
| O | 9.720769861  | 11.072517268 | 8.873051376  |
| O | 9.720768952  | 11.074043540 | 5.915830122  |
| O | 6.466641895  | 11.800800360 | 8.879141136  |
| O | -0.028962686 | 11.797797823 | 2.956183207  |
| O | 6.468236011  | 11.807580178 | 0.008000004  |
| O | 6.466027525  | 11.797009505 | 5.918810826  |
| O | -0.029563808 | 11.797159882 | -0.001426058 |
| O | -0.029406643 | 11.797385269 | 5.912412314  |
| O | 6.467209376  | 11.803667165 | 2.954795714  |
| O | -0.029494967 | 11.797032008 | 8.869710106  |
| O | 8.433460025  | 13.107281129 | 1.482930738  |
| O | 8.432733171  | 13.101069243 | 4.440206172  |
| O | 10.966458907 | 13.110751228 | 1.480899478  |
| O | 10.966634516 | 13.112162127 | 4.439191193  |
| O | 1.956638937  | 13.096402916 | 1.481396912  |
| O | 1.956926898  | 13.096889766 | 4.438191946  |
| O | 4.490955273  | 13.111901022 | 1.481200423  |
| O | 4.491645628  | 13.103528137 | 4.439882041  |
| O | 1.957085362  | 13.097402690 | 7.396258190  |
| O | 1.956222905  | 13.095050596 | 10.352566554 |

|   |              |              |              |
|---|--------------|--------------|--------------|
| O | 4.492235189  | 13.106108476 | 7.396214302  |
| O | 4.491395853  | 13.106228491 | 10.353970136 |
| O | 8.431669129  | 13.101627530 | 7.395141239  |
| O | 8.433374169  | 13.102549794 | 10.351371173 |
| O | 10.966579183 | 13.111295585 | 7.394791201  |
| O | 10.965974035 | 13.110896247 | 10.352425427 |
| O | -0.035460723 | 14.409015205 | 2.963444334  |
| O | -0.033549031 | 14.408295467 | 5.920597924  |
| O | -0.035201337 | 14.407870054 | 8.877900093  |
| O | -0.033043118 | 14.406895284 | 0.006045517  |
| O | 6.453158871  | 14.429524682 | 2.971798989  |
| O | 6.457510509  | 14.419258335 | 5.919479671  |
| O | 6.453858188  | 14.424051107 | 8.875504599  |
| O | 6.460674191  | 14.439334541 | 0.000216127  |
| O | 9.694196465  | 15.113148698 | 8.865006420  |
| O | 3.213436913  | 15.104121799 | 8.883051055  |
| O | 9.691727035  | 15.120240701 | 5.917800696  |
| O | 9.694186464  | 15.111891748 | 2.966577995  |
| O | 3.210172568  | 15.105193011 | 2.965134666  |
| O | 9.691487002  | 15.105268021 | -0.001504134 |
| O | 3.204727923  | 15.106553904 | 0.002562410  |
| O | 3.209933184  | 15.102954860 | 5.920147216  |

|   |              |              |              |
|---|--------------|--------------|--------------|
| O | 1.239664191  | 16.468271924 | 10.354498091 |
| O | 5.164298172  | 16.479441604 | 4.453088015  |
| O | 5.168639549  | 16.473359735 | 7.397165520  |
| O | 7.730914277  | 16.461318869 | 1.491104400  |
| O | 7.727318977  | 16.459974406 | 4.438413278  |
| O | 5.167660193  | 16.477449200 | 10.358633128 |
| O | 11.653807109 | 16.468106902 | 1.480244591  |
| O | 11.653761129 | 16.476651953 | 4.444815340  |
| O | 1.238692109  | 16.460963465 | 4.435381588  |
| O | 1.236755089  | 16.463771333 | 1.480716237  |
| O | 5.163891493  | 16.457109745 | 1.484394060  |
| O | 7.728172471  | 16.455267360 | 7.403486548  |
| O | 7.729901021  | 16.461798217 | 10.355203017 |
| O | 1.239943580  | 16.455163418 | 7.401376621  |
| O | 11.652647859 | 16.482137315 | 7.391195002  |
| O | 11.655685290 | 16.465408691 | 10.351598420 |
| O | 3.198734501  | 17.729034193 | 8.877550055  |
| O | 3.215285609  | 17.738315054 | 0.012288707  |
| O | 9.682932578  | 17.738875485 | 2.957170387  |
| O | 9.642641840  | 17.773621474 | 5.908085874  |
| O | 3.195155307  | 17.731379144 | 2.956738725  |
| O | 3.183260294  | 17.730674408 | 5.925911780  |

|   |              |              |              |
|---|--------------|--------------|--------------|
| O | 9.671029512  | 17.744574804 | 8.873088876  |
| O | 9.680176484  | 17.726134169 | -0.004224468 |
| O | 6.474789380  | 18.539938486 | 0.038595135  |
| O | 6.517821664  | 18.534833174 | 5.940725042  |
| O | -0.040820681 | 18.515667086 | -0.000744437 |
| O | 6.433820367  | 18.514643381 | 2.974757809  |
| O | -0.019952096 | 18.510132074 | 5.920746503  |
| O | 6.484673987  | 18.533070085 | 8.893585787  |
| O | -0.041335557 | 18.513466798 | 8.871209862  |
| O | -0.044128279 | 18.510955397 | 2.952632198  |
| O | 1.976062778  | 19.949801397 | 4.438638514  |
| O | 4.482099509  | 19.963499624 | 1.517116153  |
| O | 4.410306385  | 19.929612319 | 4.444513330  |
| O | 1.981056712  | 19.967847695 | 7.421313874  |
| O | 2.003747886  | 19.949767107 | 10.368243377 |
| O | 4.469258132  | 19.883870958 | 7.393683595  |
| O | 4.492126993  | 19.915211857 | 10.350329104 |
| O | 8.467896581  | 19.956040430 | 1.472109375  |
| O | 8.473299272  | 20.201535153 | 4.337470947  |
| O | 10.937041743 | 19.946808147 | 1.439666579  |
| O | 10.916208097 | 19.911296343 | 4.448896197  |
| O | 8.434179734  | 20.046653395 | 7.401886122  |

|   |              |              |              |
|---|--------------|--------------|--------------|
| O | 8.438722177  | 20.014008039 | 10.348612274 |
| O | 10.903889649 | 19.932499841 | 7.365720077  |
| O | 10.916632571 | 19.939006052 | 10.338440237 |
| O | 1.990838057  | 19.959035824 | 1.460563449  |
| O | 6.664871635  | 21.094281618 | 3.082986819  |
| O | 6.372078236  | 21.141289216 | 5.921990386  |
| O | -0.055495817 | 21.115719789 | 2.958249720  |
| O | -0.055421521 | 21.114908611 | 5.915340968  |
| O | -0.058126569 | 21.118240834 | 8.869707148  |
| O | -0.039752222 | 21.125538577 | -0.004367370 |
| O | 6.432360555  | 21.175612293 | 8.890112617  |
| O | 6.434257310  | 21.188893679 | 0.028700976  |
| H | 0.000000000  | 0.932899949  | 9.814800036  |
| H | 0.816399984  | 0.932899949  | 8.400899982  |
| H | 6.457700016  | 0.932899949  | 6.856699960  |
| H | 0.834099951  | 0.932899949  | -0.439200043 |
| H | 0.000000000  | 0.932899949  | 3.900000036  |
| H | 0.816399984  | 0.932899949  | 2.486099982  |
| H | 6.457700016  | 0.932899949  | 0.941899960  |
| H | 0.834099951  | 0.932899949  | 5.475599957  |
| H | 6.494400000  | 0.932899949  | 9.814800036  |
| H | 7.310799984  | 0.932899949  | 8.400899982  |



|   |              |              |              |
|---|--------------|--------------|--------------|
| H | -0.036699984 | 0.932899949  | 6.856699960  |
| H | 7.328499951  | 0.932899949  | -0.439200043 |
| H | 6.494400000  | 0.932899949  | 3.900000036  |
| H | 7.310799984  | 0.932899949  | 2.486099982  |
| H | -0.036699984 | 0.932899949  | 0.941899960  |
| H | 7.328499951  | 0.932899949  | 5.475599957  |
| H | 7.158008832  | 21.838576097 | 0.000731542  |
| H | 7.236876177  | 21.723427411 | 8.895222413  |
| H | 7.802717532  | 20.900400812 | 3.705143811  |
| H | 6.967288307  | 21.907037940 | 5.872397627  |

3-b:

|    |             |             |              |
|----|-------------|-------------|--------------|
| Ti | 3.247200000 | 3.247194072 | 1.478700000  |
| Ti | 3.247200000 | 3.247194072 | 4.436100000  |
| Ti | 0.000000000 | 3.247194072 | 2.957400000  |
| Ti | 0.000000000 | 3.247194072 | 0.000000000  |
| Ti | 3.247200000 | 3.247194072 | 7.393500000  |
| Ti | 3.247200000 | 3.247194072 | 10.350900000 |
| Ti | 0.000000000 | 3.247194072 | 8.872200000  |
| Ti | 0.000000000 | 3.247194072 | 5.914800000  |
| Ti | 9.741600000 | 3.247194072 | 1.478700000  |
| Ti | 9.741600000 | 3.247194072 | 4.436100000  |
| Ti | 6.494400000 | 3.247194072 | 2.957400000  |

|    |             |             |              |
|----|-------------|-------------|--------------|
| Ti | 6.494400000 | 3.247194072 | 0.000000000  |
| Ti | 9.741600000 | 3.247194072 | 7.393500000  |
| Ti | 9.741600000 | 3.247194072 | 10.350900000 |
| Ti | 6.494400000 | 3.247194072 | 8.872200000  |
| Ti | 6.494400000 | 3.247194072 | 5.914800000  |
| Ti | 0.000000000 | 6.494391717 | 4.436100000  |
| Ti | 0.000000000 | 6.494391717 | 1.478700000  |
| Ti | 3.247200000 | 6.494391717 | 2.957400000  |
| Ti | 3.247200000 | 6.494391717 | 0.000000000  |
| Ti | 0.000000000 | 6.494391717 | 10.350900000 |
| Ti | 0.000000000 | 6.494391717 | 7.393500000  |
| Ti | 3.247200000 | 6.494391717 | 8.872200000  |
| Ti | 3.247200000 | 6.494391717 | 5.914800000  |
| Ti | 6.494400000 | 6.494391717 | 4.436100000  |
| Ti | 6.494400000 | 6.494391717 | 1.478700000  |
| Ti | 9.741600000 | 6.494391717 | 2.957400000  |
| Ti | 9.741600000 | 6.494391717 | 0.000000000  |
| Ti | 6.494400000 | 6.494391717 | 10.350900000 |
| Ti | 6.494400000 | 6.494391717 | 7.393500000  |
| Ti | 9.741600000 | 6.494391717 | 8.872200000  |
| Ti | 9.741600000 | 6.494391717 | 5.914800000  |
| Ti | 3.227011118 | 9.735952907 | 1.478908674  |

|    |              |              |              |
|----|--------------|--------------|--------------|
| Ti | 3.226155936  | 9.735632150  | 4.436406150  |
| Ti | -0.013473802 | 9.835613488  | 2.959990328  |
| Ti | -0.011582113 | 9.836696487  | 0.000900114  |
| Ti | 3.226659642  | 9.737260578  | 7.393764037  |
| Ti | 3.226884088  | 9.736006128  | 10.350716286 |
| Ti | -0.014171820 | 9.836403949  | 8.871989078  |
| Ti | -0.016574878 | 9.835515975  | 5.917693757  |
| Ti | 9.739814689  | 9.732414228  | 1.482238588  |
| Ti | 9.734546302  | 9.738669692  | 4.439206926  |
| Ti | 6.483624232  | 9.766202234  | 2.961399351  |
| Ti | 6.481436528  | 9.756793142  | 0.008004499  |
| Ti | 9.730516787  | 9.738029608  | 7.392409429  |
| Ti | 9.738766493  | 9.733104676  | 10.350095232 |
| Ti | 6.481691758  | 9.757656827  | 8.881093375  |
| Ti | 6.476404277  | 9.747162235  | 5.919444892  |
| Ti | -0.032400042 | 13.173403737 | 1.503388848  |
| Ti | -0.033247561 | 13.172002125 | 4.461480407  |
| Ti | 3.213115830  | 12.989219562 | 2.958598102  |
| Ti | 3.212750066  | 12.989485668 | 5.916013954  |
| Ti | 6.461309993  | 13.111656704 | 1.472389500  |
| Ti | 6.462148550  | 13.068900377 | 4.428961073  |
| Ti | 9.709240093  | 12.988239790 | 2.960917886  |

|    |              |              |              |
|----|--------------|--------------|--------------|
| Ti | 9.709984611  | 12.994219146 | 5.918877781  |
| Ti | -0.033108971 | 13.172786513 | 7.418900162  |
| Ti | -0.034050139 | 13.175016092 | 10.375294173 |
| Ti | 3.213025038  | 12.989389941 | 8.873494631  |
| Ti | 3.212101275  | 12.988805936 | 0.001110563  |
| Ti | 6.460957347  | 13.043318448 | 7.400228085  |
| Ti | 6.461581069  | 13.086468755 | 10.379648412 |
| Ti | 9.709515326  | 12.988281939 | 8.874560952  |
| Ti | 9.711351163  | 12.981730722 | 0.003693674  |
| Ti | 9.704679596  | 16.289119123 | 1.478846687  |
| Ti | 9.707000694  | 16.309217119 | 4.441254157  |
| Ti | 6.447695133  | 16.380033914 | 2.963472252  |
| Ti | -0.048114931 | 16.624454924 | 5.923687224  |
| Ti | 3.181676310  | 16.300798871 | 1.487939982  |
| Ti | 3.183357580  | 16.302772701 | 4.445219675  |
| Ti | -0.050818160 | 16.620714433 | 2.963299422  |
| Ti | 6.452619187  | 16.341883549 | 5.916344236  |
| Ti | 3.193132691  | 16.303089171 | 7.402068652  |
| Ti | 3.180597070  | 16.300894598 | 10.359693651 |
| Ti | -0.047389247 | 16.638618212 | 8.873769551  |
| Ti | 6.446938145  | 16.442210289 | 0.009740138  |
| Ti | 9.696784873  | 16.304497213 | 7.398962673  |

|    |              |              |              |
|----|--------------|--------------|--------------|
| Ti | 9.705169923  | 16.301782571 | 10.352080594 |
| Ti | 6.443966568  | 16.325027051 | 8.880117433  |
| Ti | -0.049077791 | 16.634918440 | 0.003271239  |
| Ti | 6.443970335  | 19.717230514 | 7.393866244  |
| Ti | 6.426274393  | 19.707252775 | 10.393441016 |
| Ti | 3.208447785  | 19.544191730 | 8.889779732  |
| Ti | 3.216675541  | 19.544311746 | -0.001033789 |
| Ti | 6.455556604  | 19.927732786 | 1.603838004  |
| Ti | 6.297081164  | 19.818697760 | 4.394875737  |
| Ti | 3.164478359  | 19.546752423 | 2.940982645  |
| Ti | 3.163725788  | 19.545507617 | 5.941641244  |
| Ti | -0.014130386 | 20.000175152 | 1.474289570  |
| Ti | -0.045448980 | 19.991839772 | 4.439219584  |
| Ti | 9.795014102  | 19.544047068 | 2.877650397  |
| Ti | 9.775241252  | 19.561365413 | 5.998748047  |
| Ti | -0.015017910 | 20.005325114 | 7.402965691  |
| Ti | -0.043866035 | 20.004101382 | 10.353955231 |
| Ti | 9.671052891  | 19.550488271 | 8.898496964  |
| Ti | 9.669387857  | 19.542744754 | -0.022447021 |
| O  | 0.000000000  | 1.266694833  | 2.957400000  |
| O  | 0.000000000  | 1.266694833  | 0.000000000  |
| O  | 0.000000000  | 1.266694833  | 8.872200000  |

|   |             |             |              |
|---|-------------|-------------|--------------|
| O | 0.000000000 | 1.266694833 | 5.914800000  |
| O | 6.494400000 | 1.266694833 | 2.957400000  |
| O | 6.494400000 | 1.266694833 | 0.000000000  |
| O | 6.494400000 | 1.266694833 | 8.872200000  |
| O | 6.494400000 | 1.266694833 | 5.914800000  |
| O | 9.741600000 | 1.980495667 | 8.872200000  |
| O | 9.741600000 | 1.980495667 | 5.914800000  |
| O | 9.741600000 | 1.980495667 | 2.957400000  |
| O | 9.741600000 | 1.980495667 | 0.000000000  |
| O | 3.247200000 | 1.980495667 | 8.872200000  |
| O | 3.247200000 | 1.980495667 | 5.914800000  |
| O | 3.247200000 | 1.980495667 | 2.957400000  |
| O | 3.247200000 | 1.980495667 | 0.000000000  |
| O | 1.266698949 | 3.247194072 | 1.478700000  |
| O | 1.266698949 | 3.247194072 | 4.436100000  |
| O | 5.227599738 | 3.247194072 | 1.478700000  |
| O | 5.227599738 | 3.247194072 | 4.436100000  |
| O | 1.266698949 | 3.247194072 | 7.393500000  |
| O | 1.266698949 | 3.247194072 | 10.350900000 |
| O | 5.227599738 | 3.247194072 | 7.393500000  |
| O | 5.227599738 | 3.247194072 | 10.350900000 |
| O | 7.761098949 | 3.247194072 | 1.478700000  |

|   |              |             |              |
|---|--------------|-------------|--------------|
| O | 7.761098949  | 3.247194072 | 4.436100000  |
| O | 11.721999738 | 3.247194072 | 1.478700000  |
| O | 11.721999738 | 3.247194072 | 4.436100000  |
| O | 7.761098949  | 3.247194072 | 7.393500000  |
| O | 7.761098949  | 3.247194072 | 10.350900000 |
| O | 11.721999738 | 3.247194072 | 7.393500000  |
| O | 11.721999738 | 3.247194072 | 10.350900000 |
| O | 9.741600000  | 4.513896049 | 8.872200000  |
| O | 9.741600000  | 4.513896049 | 5.914800000  |
| O | 9.741600000  | 4.513896049 | 2.957400000  |
| O | 9.741600000  | 4.513896049 | 0.000000000  |
| O | 3.247200000  | 4.513896049 | 8.872200000  |
| O | 3.247200000  | 4.513896049 | 5.914800000  |
| O | 3.247200000  | 4.513896049 | 2.957400000  |
| O | 3.247200000  | 4.513896049 | 0.000000000  |
| O | 0.000000000  | 5.227596870 | 2.957400000  |
| O | 0.000000000  | 5.227596870 | 0.000000000  |
| O | 0.000000000  | 5.227596870 | 8.872200000  |
| O | 0.000000000  | 5.227596870 | 5.914800000  |
| O | 6.494400000  | 5.227596870 | 0.000000000  |
| O | 6.494400000  | 5.227596870 | 2.957400000  |
| O | 6.494400000  | 5.227596870 | 8.872200000  |

|   |              |             |              |
|---|--------------|-------------|--------------|
| O | 6.494400000  | 5.227596870 | 5.914800000  |
| O | 8.474899752  | 6.494391717 | 7.393500000  |
| O | 11.008298949 | 6.494391717 | 7.393500000  |
| O | 8.474899752  | 6.494391717 | 10.350900000 |
| O | 11.008298949 | 6.494391717 | 10.350900000 |
| O | 8.474899752  | 6.494391717 | 1.478700000  |
| O | 11.008298949 | 6.494391717 | 1.478700000  |
| O | 8.474899752  | 6.494391717 | 4.436100000  |
| O | 11.008298949 | 6.494391717 | 4.436100000  |
| O | 1.980499752  | 6.494391717 | 1.478700000  |
| O | 4.513898949  | 6.494391717 | 1.478700000  |
| O | 1.980499752  | 6.494391717 | 4.436100000  |
| O | 4.513898949  | 6.494391717 | 4.436100000  |
| O | 1.980499752  | 6.494391717 | 7.393500000  |
| O | 4.513898949  | 6.494391717 | 7.393500000  |
| O | 1.980499752  | 6.494391717 | 10.350900000 |
| O | 4.513898949  | 6.494391717 | 10.350900000 |
| O | 0.000000000  | 7.761086550 | 8.872200000  |
| O | 0.000000000  | 7.761086550 | 5.914800000  |
| O | 6.494400000  | 7.761086550 | 2.957400000  |
| O | 6.494400000  | 7.761086550 | 0.000000000  |
| O | 0.000000000  | 7.761086550 | 2.957400000  |



|   |              |             |              |
|---|--------------|-------------|--------------|
| O | 0.000000000  | 7.761086550 | 0.000000000  |
| O | 6.494400000  | 7.761086550 | 8.872200000  |
| O | 6.494400000  | 7.761086550 | 5.914800000  |
| O | 3.247200000  | 8.474887384 | 2.957400000  |
| O | 3.247200000  | 8.474887384 | 0.000000000  |
| O | 3.247200000  | 8.474887384 | 8.872200000  |
| O | 3.247200000  | 8.474887384 | 5.914800000  |
| O | 9.741600000  | 8.474887384 | 2.957400000  |
| O | 9.741600000  | 8.474887384 | 0.000000000  |
| O | 9.741600000  | 8.474887384 | 8.872200000  |
| O | 9.741600000  | 8.474887384 | 5.914800000  |
| O | 1.268556218  | 9.785691935 | 1.479892897  |
| O | 1.267974579  | 9.785762659 | 4.436836156  |
| O | 5.211235019  | 9.778064505 | 1.481137252  |
| O | 5.210450366  | 9.777474428 | 4.437737453  |
| O | 1.267934444  | 9.785452261 | 7.393437776  |
| O | 1.268707018  | 9.785476550 | 10.351280203 |
| O | 5.210442443  | 9.776528232 | 7.396164263  |
| O | 5.211038239  | 9.777426922 | 10.354552980 |
| O | 7.759181283  | 9.783702388 | 1.480651411  |
| O | 7.758173482  | 9.783238756 | 4.439303929  |
| O | 11.700588091 | 9.778669228 | 1.479432725  |

|   |              |              |              |
|---|--------------|--------------|--------------|
| O | 11.699473522 | 9.778842822  | 4.436498658  |
| O | 7.757398570  | 9.782192904  | 7.394991594  |
| O | 7.759078022  | 9.782894425  | 10.354468517 |
| O | 11.699306746 | 9.778942478  | 7.394192741  |
| O | 11.700271944 | 9.778352043  | 10.351852993 |
| O | 9.722290200  | 11.069129323 | 2.958012182  |
| O | 9.722613622  | 11.067630912 | 0.001641594  |
| O | 3.241061233  | 11.068345292 | 2.958356896  |
| O | 3.241326075  | 11.068836785 | 0.001376729  |
| O | 3.240650268  | 11.068247779 | 8.873211904  |
| O | 3.241121761  | 11.068215989 | 5.915621921  |
| O | 9.722193044  | 11.068666762 | 8.873489781  |
| O | 9.721868584  | 11.070374844 | 5.916268172  |
| O | 6.466931026  | 11.802370209 | 8.879314321  |
| O | -0.028422482 | 11.797785321 | 2.957777601  |
| O | 6.466986358  | 11.810298392 | 0.007468263  |
| O | 6.466213655  | 11.802160181 | 5.915179375  |
| O | -0.028872804 | 11.796542301 | 0.000647552  |
| O | -0.029007108 | 11.797548862 | 5.912978360  |
| O | 6.468130022  | 11.809716173 | 2.957845030  |
| O | -0.029289744 | 11.796341560 | 8.870967001  |
| O | 8.434759294  | 13.101214619 | 1.482344463  |

|   |              |              |              |
|---|--------------|--------------|--------------|
| O | 8.433386508  | 13.096988707 | 4.440256212  |
| O | 10.967610624 | 13.107179688 | 1.481741627  |
| O | 10.967762593 | 13.107478655 | 4.438883860  |
| O | 1.956739860  | 13.094094756 | 1.481632203  |
| O | 1.956428518  | 13.094755200 | 4.438849672  |
| O | 4.491063080  | 13.109739309 | 1.482834682  |
| O | 4.492112835  | 13.104738653 | 4.439532122  |
| O | 1.956355911  | 13.093750782 | 7.395665172  |
| O | 1.956366432  | 13.093847223 | 10.353661029 |
| O | 4.491884752  | 13.103570285 | 7.395833507  |
| O | 4.491093084  | 13.105911307 | 10.352603344 |
| O | 8.432820586  | 13.096580796 | 7.396720845  |
| O | 8.434116738  | 13.097016925 | 10.352251059 |
| O | 10.967819354 | 13.107510088 | 7.395719115  |
| O | 10.967710768 | 13.105613768 | 10.353774711 |
| O | -0.035138081 | 14.408968413 | 2.964359354  |
| O | -0.034683863 | 14.408576219 | 5.921311130  |
| O | -0.034624244 | 14.406002666 | 8.878485776  |
| O | -0.033960516 | 14.406329495 | 0.006995789  |
| O | 6.457779637  | 14.436985662 | 2.967517975  |
| O | 6.457897835  | 14.427474771 | 5.920588342  |
| O | 6.454769223  | 14.420918910 | 8.871133798  |

|   |              |              |              |
|---|--------------|--------------|--------------|
| O | 6.458175016  | 14.438421207 | 0.002358704  |
| O | 9.692844201  | 15.101268567 | 8.874541788  |
| O | 3.209985659  | 15.099534768 | 8.877558927  |
| O | 9.689930034  | 15.106190285 | 5.917673292  |
| O | 9.689926527  | 15.103982495 | 2.966269243  |
| O | 3.208447136  | 15.102123680 | 2.965657889  |
| O | 9.691779379  | 15.099223656 | -0.000474485 |
| O | 3.206707936  | 15.100371307 | 0.006451864  |
| O | 3.210223484  | 15.100999246 | 5.920457270  |
| O | 1.236531032  | 16.456782559 | 10.355180422 |
| O | 5.164271285  | 16.477128444 | 4.444873896  |
| O | 5.166818519  | 16.478038206 | 7.394636588  |
| O | 7.731036112  | 16.462666903 | 1.488362654  |
| O | 7.732830385  | 16.462033605 | 4.440843078  |
| O | 5.163299983  | 16.467450388 | 10.354196555 |
| O | 11.650222460 | 16.465359756 | 1.481503615  |
| O | 11.651025168 | 16.463457364 | 4.443749611  |
| O | 1.237178914  | 16.461349587 | 4.440661375  |
| O | 1.236914981  | 16.459740447 | 1.485056636  |
| O | 5.164348698  | 16.471050860 | 1.487974170  |
| O | 7.728105059  | 16.458425274 | 7.397919893  |
| O | 7.728131816  | 16.451309698 | 10.353129643 |

|   |              |              |              |
|---|--------------|--------------|--------------|
| O | 1.238321019  | 16.456632539 | 7.397883813  |
| O | 11.650261687 | 16.470802256 | 7.399142956  |
| O | 11.652995439 | 16.468894149 | 10.353244035 |
| O | 3.192706529  | 17.723359162 | 8.878500918  |
| O | 3.199297565  | 17.723828867 | 0.006342085  |
| O | 9.678445467  | 17.739337331 | 2.960196636  |
| O | 9.669575805  | 17.751798609 | 5.918827979  |
| O | 3.194010474  | 17.728733082 | 2.960575065  |
| O | 3.186187190  | 17.728067280 | 5.921777216  |
| O | 9.664224290  | 17.729753573 | 8.876673008  |
| O | 9.667845307  | 17.722515123 | 0.000718648  |
| O | 6.472884572  | 18.525264418 | 0.009574168  |
| O | 6.506531669  | 18.558486993 | 5.901390912  |
| O | -0.030659543 | 18.508863336 | 0.003718753  |
| O | 6.474100844  | 18.540254242 | 2.986120258  |
| O | -0.047790601 | 18.507209905 | 5.921361643  |
| O | 6.486064567  | 18.519349713 | 8.885999347  |
| O | -0.026745888 | 18.512343079 | 8.874203343  |
| O | -0.057518823 | 18.504113070 | 2.964255490  |
| O | 1.970046755  | 19.942439002 | 4.440649073  |
| O | 4.462676058  | 19.916631686 | 1.488454570  |
| O | 4.406371038  | 19.942153965 | 4.449101913  |

|   |              |              |              |
|---|--------------|--------------|--------------|
| O | 1.993789762  | 19.976162714 | 7.412785679  |
| O | 1.995776659  | 19.949341694 | 10.358965185 |
| O | 4.473048654  | 19.867652758 | 7.396402747  |
| O | 4.478646696  | 19.906792181 | 10.351999680 |
| O | 8.467382094  | 19.995086984 | 1.488861508  |
| O | 8.453800356  | 20.194581383 | 4.433186015  |
| O | 10.942666153 | 19.924320553 | 1.437945608  |
| O | 10.880289000 | 19.952429242 | 4.440449626  |
| O | 8.454089097  | 20.016923065 | 7.391292005  |
| O | 8.426846388  | 20.018805454 | 10.353661502 |
| O | 10.936220851 | 19.932218732 | 7.431341353  |
| O | 10.917250708 | 19.926504411 | 10.351946920 |
| O | 1.985166238  | 19.952194569 | 1.471559180  |
| O | 6.458053051  | 21.112188968 | 3.007589799  |
| O | 6.386597246  | 21.168168459 | 5.940887935  |
| O | -0.063467433 | 21.107034720 | 2.959797623  |
| O | -0.066884786 | 21.109875093 | 5.917953653  |
| O | -0.045043860 | 21.120383972 | 8.878082623  |
| O | -0.042356737 | 21.118399426 | 0.002602275  |
| O | 6.430863466  | 21.154007671 | 8.868034206  |
| O | 6.427659909  | 21.182018491 | 0.003969777  |
| H | 0.000000000  | 0.932897449  | 9.814799089  |

|   |              |              |              |
|---|--------------|--------------|--------------|
| H | 0.816399334  | 0.932897449  | 8.400899272  |
| H | 6.457698847  | 0.932897449  | 6.856699960  |
| H | 0.834099172  | 0.932897449  | -0.439201108 |
| H | 0.000000000  | 0.932897449  | 3.899999089  |
| H | 0.816399334  | 0.932897449  | 2.486099272  |
| H | 6.457698847  | 0.932897449  | 0.941899960  |
| H | 0.834099172  | 0.932897449  | 5.475598892  |
| H | 6.494400000  | 0.932897449  | 9.814799089  |
| H | 7.310799334  | 0.932897449  | 8.400899272  |
| H | -0.036701153 | 0.932897449  | 6.856699960  |
| H | 7.328499172  | 0.932897449  | -0.439201108 |
| H | 6.494400000  | 0.932897449  | 3.899999089  |
| H | 7.310799334  | 0.932897449  | 2.486099272  |
| H | -0.036701153 | 0.932897449  | 0.941899960  |
| H | 7.328499172  | 0.932897449  | 5.475598892  |
| H | 7.148767561  | 21.834041573 | -0.025548269 |
| H | 7.233670151  | 21.703145106 | 8.886907387  |
| H | 8.376683512  | 21.159107269 | 4.290105110  |
| H | 6.908519832  | 21.979003815 | 6.038376260  |

TS3-2:

|    |             |             |             |
|----|-------------|-------------|-------------|
| Ti | 3.247200000 | 3.247190143 | 1.478700000 |
| Ti | 3.247200000 | 3.247190143 | 4.436100000 |

|    |             |             |              |
|----|-------------|-------------|--------------|
| Ti | 0.000000000 | 3.247190143 | 2.957400000  |
| Ti | 0.000000000 | 3.247190143 | 0.000000000  |
| Ti | 3.247200000 | 3.247190143 | 7.393500000  |
| Ti | 3.247200000 | 3.247190143 | 10.350900000 |
| Ti | 0.000000000 | 3.247190143 | 8.872200000  |
| Ti | 0.000000000 | 3.247190143 | 5.914800000  |
| Ti | 9.741600000 | 3.247190143 | 1.478700000  |
| Ti | 9.741600000 | 3.247190143 | 4.436100000  |
| Ti | 6.494400000 | 3.247190143 | 2.957400000  |
| Ti | 6.494400000 | 3.247190143 | 0.000000000  |
| Ti | 9.741600000 | 3.247190143 | 7.393500000  |
| Ti | 9.741600000 | 3.247190143 | 10.350900000 |
| Ti | 6.494400000 | 3.247190143 | 8.872200000  |
| Ti | 6.494400000 | 3.247190143 | 5.914800000  |
| Ti | 0.000000000 | 6.494389931 | 4.436100000  |
| Ti | 0.000000000 | 6.494389931 | 1.478700000  |
| Ti | 3.247200000 | 6.494389931 | 2.957400000  |
| Ti | 3.247200000 | 6.494389931 | 0.000000000  |
| Ti | 0.000000000 | 6.494389931 | 10.350900000 |
| Ti | 0.000000000 | 6.494389931 | 7.393500000  |
| Ti | 3.247200000 | 6.494389931 | 8.872200000  |
| Ti | 3.247200000 | 6.494389931 | 5.914800000  |



|    |              |             |              |
|----|--------------|-------------|--------------|
| Ti | 6.494400000  | 6.494389931 | 4.436100000  |
| Ti | 6.494400000  | 6.494389931 | 1.478700000  |
| Ti | 9.741600000  | 6.494389931 | 2.957400000  |
| Ti | 9.741600000  | 6.494389931 | 0.000000000  |
| Ti | 6.494400000  | 6.494389931 | 10.350900000 |
| Ti | 6.494400000  | 6.494389931 | 7.393500000  |
| Ti | 9.741600000  | 6.494389931 | 8.872200000  |
| Ti | 9.741600000  | 6.494389931 | 5.914800000  |
| Ti | 3.226213346  | 9.736728723 | 1.478748738  |
| Ti | 3.225438694  | 9.735083864 | 4.436172634  |
| Ti | -0.012487173 | 9.837287993 | 2.960119980  |
| Ti | -0.011633419 | 9.837240487 | 0.000703270  |
| Ti | 3.226241402  | 9.737102343 | 7.393702523  |
| Ti | 3.226809013  | 9.735985054 | 10.350977484 |
| Ti | -0.013403143 | 9.836770782 | 8.872522120  |
| Ti | -0.016781789 | 9.836547539 | 5.917606454  |
| Ti | 9.741712873  | 9.732797850 | 1.483691500  |
| Ti | 9.735874667  | 9.744225064 | 4.438471125  |
| Ti | 6.485192629  | 9.785256878 | 2.959041712  |
| Ti | 6.482210920  | 9.766171873 | 0.007294486  |
| Ti | 9.732042062  | 9.744293644 | 7.390844728  |
| Ti | 9.739367875  | 9.732708552 | 10.345852901 |

|    |              |              |              |
|----|--------------|--------------|--------------|
| Ti | 6.481857365  | 9.755551908  | 8.878474775  |
| Ti | 6.475638198  | 9.756485244  | 5.915385092  |
| Ti | -0.033720743 | 13.173236215 | 1.503346972  |
| Ti | -0.032264179 | 13.173883800 | 4.461169762  |
| Ti | 3.212466260  | 12.988969172 | 2.957935171  |
| Ti | 3.212162582  | 12.989124192 | 5.915822551  |
| Ti | 6.462314287  | 13.161154272 | 1.497760798  |
| Ti | 6.460147755  | 13.112710414 | 4.409027251  |
| Ti | 9.710263481  | 13.003721822 | 2.962161414  |
| Ti | 9.709622354  | 13.005875676 | 5.917827313  |
| Ti | -0.033160926 | 13.173380877 | 7.418235339  |
| Ti | -0.035046640 | 13.173749497 | 10.375019726 |
| Ti | 3.211673424  | 12.989736058 | 8.873659654  |
| Ti | 3.211699921  | 12.989468166 | 0.001262573  |
| Ti | 6.458850564  | 13.033143184 | 7.382856554  |
| Ti | 6.459890837  | 13.056126558 | 10.392294018 |
| Ti | 9.706619603  | 13.003449287 | 8.872763562  |
| Ti | 9.710340634  | 12.978673892 | 0.002670296  |
| Ti | 9.703262258  | 16.279919344 | 1.498740880  |
| Ti | 9.708831076  | 16.356379380 | 4.467097337  |
| Ti | 6.444666534  | 16.528029410 | 2.962664054  |
| Ti | -0.044931506 | 16.641456799 | 5.920079787  |

|    |              |              |              |
|----|--------------|--------------|--------------|
| Ti | 3.187126151  | 16.302610537 | 1.487573856  |
| Ti | 3.183583845  | 16.302718051 | 4.445520502  |
| Ti | -0.049165076 | 16.639854088 | 2.957743650  |
| Ti | 6.452392143  | 16.362852730 | 5.912843857  |
| Ti | 3.194349092  | 16.306408178 | 7.400590899  |
| Ti | 3.180308200  | 16.301456100 | 10.359691640 |
| Ti | -0.047027249 | 16.641990440 | 8.872594399  |
| Ti | 6.446487954  | 16.446201884 | 0.002322150  |
| Ti | 9.697674996  | 16.352523874 | 7.358782727  |
| Ti | 9.706795341  | 16.276552474 | 10.340163928 |
| Ti | 6.446204798  | 16.291424783 | 8.877045286  |
| Ti | -0.048481475 | 16.639285442 | 0.002038358  |
| Ti | 6.436638547  | 19.680139217 | 7.377416003  |
| Ti | 6.429021265  | 19.706671628 | 10.371949590 |
| Ti | 3.212444179  | 19.550814742 | 8.879823941  |
| Ti | 3.199177419  | 19.542834409 | 0.007424612  |
| Ti | 6.442244513  | 19.904135760 | 1.570607593  |
| Ti | 6.454819490  | 19.896945531 | 4.395427824  |
| Ti | 3.200982992  | 19.549675307 | 2.965114082  |
| Ti | 3.205273712  | 19.547702548 | 5.904465543  |
| Ti | -0.032395236 | 20.007262868 | 1.481773922  |
| Ti | -0.070824419 | 20.008605544 | 4.436193454  |

|    |              |              |              |
|----|--------------|--------------|--------------|
| Ti | 9.707511674  | 19.548513726 | 2.948581388  |
| Ti | 9.834278465  | 19.645796137 | 6.047982605  |
| Ti | 0.012999061  | 20.016182253 | 7.410617076  |
| Ti | -0.043037869 | 20.004402850 | 10.357119530 |
| Ti | 9.672203180  | 19.540876295 | 8.936235399  |
| Ti | 9.701865962  | 19.529333351 | 0.031958138  |
| O  | 0.000000000  | 1.266689833  | 2.957400000  |
| O  | 0.000000000  | 1.266689833  | 0.000000000  |
| O  | 0.000000000  | 1.266689833  | 8.872200000  |
| O  | 0.000000000  | 1.266689833  | 5.914800000  |
| O  | 6.494400000  | 1.266689833  | 2.957400000  |
| O  | 6.494400000  | 1.266689833  | 0.000000000  |
| O  | 6.494400000  | 1.266689833  | 8.872200000  |
| O  | 6.494400000  | 1.266689833  | 5.914800000  |
| O  | 9.741600000  | 1.980499953  | 8.872200000  |
| O  | 9.741600000  | 1.980499953  | 5.914800000  |
| O  | 9.741600000  | 1.980499953  | 2.957400000  |
| O  | 9.741600000  | 1.980499953  | 0.000000000  |
| O  | 3.247200000  | 1.980499953  | 8.872200000  |
| O  | 3.247200000  | 1.980499953  | 5.914800000  |
| O  | 3.247200000  | 1.980499953  | 2.957400000  |
| O  | 3.247200000  | 1.980499953  | 0.000000000  |

|   |              |             |              |
|---|--------------|-------------|--------------|
| O | 1.266699988  | 3.247190143 | 1.478700000  |
| O | 1.266699988  | 3.247190143 | 4.436100000  |
| O | 5.227599998  | 3.247190143 | 1.478700000  |
| O | 5.227599998  | 3.247190143 | 4.436100000  |
| O | 1.266699988  | 3.247190143 | 7.393500000  |
| O | 1.266699988  | 3.247190143 | 10.350900000 |
| O | 5.227599998  | 3.247190143 | 7.393500000  |
| O | 5.227599998  | 3.247190143 | 10.350900000 |
| O | 7.761099988  | 3.247190143 | 1.478700000  |
| O | 7.761099988  | 3.247190143 | 4.436100000  |
| O | 11.721999998 | 3.247190143 | 1.478700000  |
| O | 11.721999998 | 3.247190143 | 4.436100000  |
| O | 7.761099988  | 3.247190143 | 7.393500000  |
| O | 7.761099988  | 3.247190143 | 10.350900000 |
| O | 11.721999998 | 3.247190143 | 7.393500000  |
| O | 11.721999998 | 3.247190143 | 10.350900000 |
| O | 9.741600000  | 4.513899978 | 8.872200000  |
| O | 9.741600000  | 4.513899978 | 5.914800000  |
| O | 9.741600000  | 4.513899978 | 2.957400000  |
| O | 9.741600000  | 4.513899978 | 0.000000000  |
| O | 3.247200000  | 4.513899978 | 8.872200000  |
| O | 3.247200000  | 4.513899978 | 5.914800000  |

|   |              |             |              |
|---|--------------|-------------|--------------|
| O | 3.247200000  | 4.513899978 | 2.957400000  |
| O | 3.247200000  | 4.513899978 | 0.000000000  |
| O | 0.000000000  | 5.227600085 | 2.957400000  |
| O | 0.000000000  | 5.227600085 | 0.000000000  |
| O | 0.000000000  | 5.227600085 | 8.872200000  |
| O | 0.000000000  | 5.227600085 | 5.914800000  |
| O | 6.494400000  | 5.227600085 | 0.000000000  |
| O | 6.494400000  | 5.227600085 | 2.957400000  |
| O | 6.494400000  | 5.227600085 | 8.872200000  |
| O | 6.494400000  | 5.227600085 | 5.914800000  |
| O | 8.474900012  | 6.494389931 | 7.393500000  |
| O | 11.008299988 | 6.494389931 | 7.393500000  |
| O | 8.474900012  | 6.494389931 | 10.350900000 |
| O | 11.008299988 | 6.494389931 | 10.350900000 |
| O | 8.474900012  | 6.494389931 | 1.478700000  |
| O | 11.008299988 | 6.494389931 | 1.478700000  |
| O | 8.474900012  | 6.494389931 | 4.436100000  |
| O | 11.008299988 | 6.494389931 | 4.436100000  |
| O | 1.980500012  | 6.494389931 | 1.478700000  |
| O | 4.513899988  | 6.494389931 | 1.478700000  |
| O | 1.980500012  | 6.494389931 | 4.436100000  |
| O | 4.513899988  | 6.494389931 | 4.436100000  |

|   |             |             |              |
|---|-------------|-------------|--------------|
| O | 1.980500012 | 6.494389931 | 7.393500000  |
| O | 4.513899988 | 6.494389931 | 7.393500000  |
| O | 1.980500012 | 6.494389931 | 10.350900000 |
| O | 4.513899988 | 6.494389931 | 10.350900000 |
| O | 0.000000000 | 7.761090122 | 8.872200000  |
| O | 0.000000000 | 7.761090122 | 5.914800000  |
| O | 6.494400000 | 7.761090122 | 2.957400000  |
| O | 6.494400000 | 7.761090122 | 0.000000000  |
| O | 0.000000000 | 7.761090122 | 2.957400000  |
| O | 0.000000000 | 7.761090122 | 0.000000000  |
| O | 6.494400000 | 7.761090122 | 8.872200000  |
| O | 6.494400000 | 7.761090122 | 5.914800000  |
| O | 3.247200000 | 8.474889884 | 2.957400000  |
| O | 3.247200000 | 8.474889884 | 0.000000000  |
| O | 3.247200000 | 8.474889884 | 8.872200000  |
| O | 3.247200000 | 8.474889884 | 5.914800000  |
| O | 9.741600000 | 8.474889884 | 2.957400000  |
| O | 9.741600000 | 8.474889884 | 0.000000000  |
| O | 9.741600000 | 8.474889884 | 8.872200000  |
| O | 9.741600000 | 8.474889884 | 5.914800000  |
| O | 1.269614935 | 9.784335329 | 1.479250550  |
| O | 1.268851193 | 9.784079581 | 4.436722119  |

|   |              |              |              |
|---|--------------|--------------|--------------|
| O | 5.211547010  | 9.779205012  | 1.480754447  |
| O | 5.210752226  | 9.778733522  | 4.436197121  |
| O | 1.268593236  | 9.783742036  | 7.393317706  |
| O | 1.269279954  | 9.783928489  | 10.350835765 |
| O | 5.210239428  | 9.776163899  | 7.395566276  |
| O | 5.211007066  | 9.777373701  | 10.352557564 |
| O | 7.759349488  | 9.785087927  | 1.479244990  |
| O | 7.757782389  | 9.784794675  | 4.438909057  |
| O | 11.700453527 | 9.777275473  | 1.478635529  |
| O | 11.699372339 | 9.777560154  | 4.435747005  |
| O | 7.756967602  | 9.783316623  | 7.393904336  |
| O | 7.758632376  | 9.782872279  | 10.352913753 |
| O | 11.699131267 | 9.777520505  | 7.394232371  |
| O | 11.700344032 | 9.776706470  | 10.351597237 |
| O | 9.721924826  | 11.071647868 | 2.957014473  |
| O | 9.723428799  | 11.066625066 | 0.000065181  |
| O | 3.240806133  | 11.067882731 | 2.958502046  |
| O | 3.240494532  | 11.067328015 | 0.000277759  |
| O | 3.240852373  | 11.067439816 | 8.872438840  |
| O | 3.240792365  | 11.067398025 | 5.915655398  |
| O | 9.721619978  | 11.071352472 | 8.873976924  |
| O | 9.722366055  | 11.072243661 | 5.915885484  |



|   |              |              |              |
|---|--------------|--------------|--------------|
| O | 6.466189625  | 11.800448885 | 8.875780820  |
| O | -0.028829681 | 11.792769663 | 2.956167356  |
| O | 6.465892052  | 11.807293712 | 0.006728558  |
| O | 6.464243773  | 11.804472627 | 5.912111842  |
| O | -0.028907743 | 11.792526774 | -0.001398259 |
| O | -0.028681738 | 11.792900037 | 5.912640270  |
| O | 6.467719056  | 11.814634676 | 2.958313718  |
| O | -0.029151413 | 11.792488554 | 8.870669960  |
| O | 8.436364710  | 13.099938023 | 1.479101260  |
| O | 8.435237802  | 13.099105771 | 4.441712199  |
| O | 10.967558928 | 13.105364807 | 1.480858902  |
| O | 10.967948203 | 13.104326456 | 4.438880311  |
| O | 1.956277978  | 13.091325821 | 1.481378576  |
| O | 1.956599840  | 13.092826375 | 4.438165093  |
| O | 4.487424787  | 13.106709626 | 1.479050748  |
| O | 4.488510911  | 13.106357080 | 4.440809600  |
| O | 1.956165365  | 13.091720158 | 7.395281893  |
| O | 1.955748165  | 13.091301532 | 10.351749247 |
| O | 4.489962669  | 13.104230729 | 7.395714028  |
| O | 4.488684441  | 13.105319443 | 10.350965063 |
| O | 8.432766293  | 13.096968704 | 7.395487255  |
| O | 8.434808912  | 13.098860024 | 10.351213603 |

|   |              |              |              |
|---|--------------|--------------|--------------|
| O | 10.967762463 | 13.104286451 | 7.395122075  |
| O | 10.967029245 | 13.107047885 | 10.352163283 |
| O | -0.032632152 | 14.402747954 | 2.964003519  |
| O | -0.033856736 | 14.403841311 | 5.921140666  |
| O | -0.032902189 | 14.402063221 | 8.877891812  |
| O | -0.033474865 | 14.401884626 | 0.006940308  |
| O | 6.452614511  | 14.424878716 | 2.961795761  |
| O | 6.457100583  | 14.424985515 | 5.924199682  |
| O | 6.454335007  | 14.407064592 | 8.870942632  |
| O | 6.458181640  | 14.426559293 | -0.006406202 |
| O | 9.697108294  | 15.111076998 | 8.861613573  |
| O | 3.204952110  | 15.103064875 | 8.875390443  |
| O | 9.698303524  | 15.109695745 | 5.918858026  |
| O | 9.693800956  | 15.107684410 | 2.969837996  |
| O | 3.205592068  | 15.102623031 | 2.964332027  |
| O | 9.696466907  | 15.101207131 | 0.003319504  |
| O | 3.200021951  | 15.101082114 | 0.004775018  |
| O | 3.205371518  | 15.102200475 | 5.921263102  |
| O | 1.237293345  | 16.452694522 | 10.355856011 |
| O | 5.162300624  | 16.464004935 | 4.445103745  |
| O | 5.165374034  | 16.463019092 | 7.396444033  |
| O | 7.726543675  | 16.451752970 | 1.476943304  |

|   |              |              |              |
|---|--------------|--------------|--------------|
| O | 7.720218390  | 16.439712818 | 4.430396713  |
| O | 5.161735092  | 16.453477482 | 10.349627253 |
| O | 11.657109772 | 16.464867906 | 1.482272421  |
| O | 11.663142550 | 16.465574070 | 4.441337082  |
| O | 1.239319987  | 16.468549460 | 4.440545445  |
| O | 1.238016042  | 16.460888098 | 1.484665076  |
| O | 5.160765868  | 16.449112981 | 1.470078351  |
| O | 7.722541047  | 16.451231473 | 7.401659585  |
| O | 7.728895298  | 16.439518864 | 10.350590183 |
| O | 1.238995917  | 16.458598154 | 7.394817463  |
| O | 11.658910539 | 16.476573728 | 7.399607741  |
| O | 11.658838191 | 16.465779811 | 10.353363869 |
| O | 3.196340016  | 17.729961458 | 8.876003335  |
| O | 3.196125960  | 17.721625006 | 0.002458782  |
| O | 9.674802888  | 17.723648486 | 2.960468007  |
| O | 9.658042400  | 17.738983356 | 5.903326708  |
| O | 3.207712230  | 17.727361831 | 2.961134841  |
| O | 3.196084526  | 17.725787695 | 5.920103091  |
| O | 9.670292917  | 17.723830653 | 8.894410784  |
| O | 9.677252446  | 17.714459780 | 0.006191613  |
| O | 6.457068240  | 18.506541246 | -0.015892003 |
| O | 6.479811889  | 18.523532762 | 5.902903444  |

|   |              |              |              |
|---|--------------|--------------|--------------|
| O | -0.027227252 | 18.507728902 | 0.005555062  |
| O | 6.446115175  | 18.493546326 | 2.937397803  |
| O | -0.059464285 | 18.517022264 | 5.930518108  |
| O | 6.476004482  | 18.504614921 | 8.886978010  |
| O | -0.006838863 | 18.510942895 | 8.882654172  |
| O | -0.051461755 | 18.510927179 | 2.963927337  |
| O | 1.979280753  | 19.922383870 | 4.438204249  |
| O | 4.449595687  | 19.906159955 | 1.465398206  |
| O | 4.445136502  | 19.923185047 | 4.452573309  |
| O | 2.017511208  | 19.974118160 | 7.399964167  |
| O | 2.005613727  | 19.947586464 | 10.351211355 |
| O | 4.484223957  | 19.889108788 | 7.391761759  |
| O | 4.471496752  | 19.898520381 | 10.352048536 |
| O | 8.444097462  | 19.971142770 | 1.453826846  |
| O | 8.420393162  | 20.049574493 | 4.335659835  |
| O | 10.927155707 | 19.928928658 | 1.468633484  |
| O | 10.904405694 | 19.981764878 | 4.428145304  |
| O | 8.467725129  | 19.929068319 | 7.434680612  |
| O | 8.445249699  | 19.993304965 | 10.379016357 |
| O | 10.963518373 | 19.950335753 | 7.525405008  |
| O | 10.924838376 | 19.918167602 | 10.373556168 |
| O | 1.990087694  | 19.933360668 | 1.484962945  |

|   |              |              |              |
|---|--------------|--------------|--------------|
| O | 6.399138452  | 21.095707519 | 2.946845749  |
| O | 6.521103804  | 21.169859752 | 5.948072643  |
| O | -0.033394984 | 21.119522788 | 2.958694513  |
| O | -0.050370696 | 21.114025638 | 5.925599005  |
| O | -0.011847734 | 21.126451197 | 8.890088958  |
| O | -0.033354979 | 21.117903290 | 0.004925372  |
| O | 6.442047992  | 21.126124011 | 8.871312780  |
| O | 6.417366804  | 21.167196545 | -0.014964562 |
| H | 0.000000000  | 0.932899949  | 9.814800036  |
| H | 0.816399984  | 0.932899949  | 8.400899982  |
| H | 6.457700016  | 0.932899949  | 6.856699960  |
| H | 0.834099951  | 0.932899949  | -0.439200043 |
| H | 0.000000000  | 0.932899949  | 3.900000036  |
| H | 0.816399984  | 0.932899949  | 2.486099982  |
| H | 6.457700016  | 0.932899949  | 0.941899960  |
| H | 0.834099951  | 0.932899949  | 5.475599957  |
| H | 6.494400000  | 0.932899949  | 9.814800036  |
| H | 7.310799984  | 0.932899949  | 8.400899982  |
| H | -0.036699984 | 0.932899949  | 6.856699960  |
| H | 7.328499951  | 0.932899949  | -0.439200043 |
| H | 6.494400000  | 0.932899949  | 3.900000036  |
| H | 7.310799984  | 0.932899949  | 2.486099982  |

|   |              |              |              |
|---|--------------|--------------|--------------|
| H | -0.036699984 | 0.932899949  | 0.941899960  |
| H | 7.328499951  | 0.932899949  | 5.475599957  |
| H | 7.133875382  | 21.824927877 | -0.014970714 |
| H | 7.209712699  | 21.722750180 | 8.863766796  |
| H | 8.949409451  | 20.955948103 | 5.141065375  |
| H | 7.362987034  | 21.676299083 | 5.985098344  |

3-c:

|    |             |             |              |
|----|-------------|-------------|--------------|
| Ti | 3.247200000 | 3.247194072 | 1.478700000  |
| Ti | 3.247200000 | 3.247194072 | 4.436100000  |
| Ti | 0.000000000 | 3.247194072 | 2.957400000  |
| Ti | 0.000000000 | 3.247194072 | 0.000000000  |
| Ti | 3.247200000 | 3.247194072 | 7.393500000  |
| Ti | 3.247200000 | 3.247194072 | 10.350900000 |
| Ti | 0.000000000 | 3.247194072 | 8.872200000  |
| Ti | 0.000000000 | 3.247194072 | 5.914800000  |
| Ti | 9.741600000 | 3.247194072 | 1.478700000  |
| Ti | 9.741600000 | 3.247194072 | 4.436100000  |
| Ti | 6.494400000 | 3.247194072 | 2.957400000  |
| Ti | 6.494400000 | 3.247194072 | 0.000000000  |
| Ti | 9.741600000 | 3.247194072 | 7.393500000  |
| Ti | 9.741600000 | 3.247194072 | 10.350900000 |
| Ti | 6.494400000 | 3.247194072 | 8.872200000  |

|    |              |             |              |
|----|--------------|-------------|--------------|
| Ti | 6.494400000  | 3.247194072 | 5.914800000  |
| Ti | 0.000000000  | 6.494391717 | 4.436100000  |
| Ti | 0.000000000  | 6.494391717 | 1.478700000  |
| Ti | 3.247200000  | 6.494391717 | 2.957400000  |
| Ti | 3.247200000  | 6.494391717 | 0.000000000  |
| Ti | 0.000000000  | 6.494391717 | 10.350900000 |
| Ti | 0.000000000  | 6.494391717 | 7.393500000  |
| Ti | 3.247200000  | 6.494391717 | 8.872200000  |
| Ti | 3.247200000  | 6.494391717 | 5.914800000  |
| Ti | 6.494400000  | 6.494391717 | 4.436100000  |
| Ti | 6.494400000  | 6.494391717 | 1.478700000  |
| Ti | 9.741600000  | 6.494391717 | 2.957400000  |
| Ti | 9.741600000  | 6.494391717 | 0.000000000  |
| Ti | 6.494400000  | 6.494391717 | 10.350900000 |
| Ti | 6.494400000  | 6.494391717 | 7.393500000  |
| Ti | 9.741600000  | 6.494391717 | 8.872200000  |
| Ti | 9.741600000  | 6.494391717 | 5.914800000  |
| Ti | 3.227534957  | 9.735947192 | 1.478476421  |
| Ti | 3.225655348  | 9.735303178 | 4.436231190  |
| Ti | -0.012079714 | 9.831730121 | 2.965278395  |
| Ti | -0.012831636 | 9.832644884 | 0.006531832  |
| Ti | 3.225753803  | 9.735038501 | 7.393664431  |

|    |              |              |              |
|----|--------------|--------------|--------------|
| Ti | 3.226760435  | 9.736769442  | 10.351482844 |
| Ti | -0.014253779 | 9.832970998  | 8.878995159  |
| Ti | -0.017706592 | 9.832495936  | 5.923761868  |
| Ti | 9.740140838  | 9.731494107  | 1.487007691  |
| Ti | 9.736188476  | 9.748544917  | 4.439619779  |
| Ti | 6.483802828  | 9.778574215  | 2.963817085  |
| Ti | 6.483694371  | 9.752724037  | 0.009652835  |
| Ti | 9.731383529  | 9.749672207  | 7.392548664  |
| Ti | 9.738356567  | 9.732164909  | 10.343121920 |
| Ti | 6.480284162  | 9.761171217  | 8.880825198  |
| Ti | 6.477234651  | 9.753550931  | 5.919729276  |
| Ti | -0.031566811 | 13.165370897 | 1.511177339  |
| Ti | -0.027427150 | 13.165229807 | 4.468270006  |
| Ti | 3.214882697  | 12.988285153 | 2.959799043  |
| Ti | 3.214815285  | 12.987974755 | 5.918815203  |
| Ti | 6.463168041  | 13.103516707 | 1.494745315  |
| Ti | 6.462858388  | 13.109368189 | 4.439674787  |
| Ti | 9.711719136  | 13.014478949 | 2.968390881  |
| Ti | 9.715633830  | 13.013155561 | 5.922167830  |
| Ti | -0.026422856 | 13.165650934 | 7.424311258  |
| Ti | -0.032533047 | 13.165670222 | 10.382938106 |
| Ti | 3.216436417  | 12.988122275 | 8.877082431  |



|    |              |              |              |
|----|--------------|--------------|--------------|
| Ti | 3.212199990  | 12.989064541 | 0.003265206  |
| Ti | 6.462640306  | 13.051697048 | 7.385035803  |
| Ti | 6.464180907  | 13.056949166 | 10.381740950 |
| Ti | 9.710542610  | 13.016819256 | 8.875367375  |
| Ti | 9.711508977  | 12.970177419 | 0.007007027  |
| Ti | 9.703190430  | 16.242668741 | 1.518760231  |
| Ti | 9.700956876  | 16.392026202 | 4.518905899  |
| Ti | 6.442862130  | 16.417325237 | 2.964475165  |
| Ti | -0.055237210 | 16.621014472 | 5.928926553  |
| Ti | 3.177842016  | 16.299265455 | 1.488312615  |
| Ti | 3.174376864  | 16.298389269 | 4.448108345  |
| Ti | -0.056681824 | 16.614656852 | 2.969043757  |
| Ti | 6.432658519  | 16.403801676 | 5.920254629  |
| Ti | 3.177926313  | 16.298359265 | 7.406032278  |
| Ti | 3.178890862  | 16.300270587 | 10.362667495 |
| Ti | -0.056596358 | 16.611838982 | 8.884562760  |
| Ti | 6.444994631  | 16.404473907 | 0.009604216  |
| Ti | 9.693964355  | 16.392987042 | 7.339350243  |
| Ti | 9.699756841  | 16.240663478 | 10.335686070 |
| Ti | 6.442140343  | 16.302221557 | 8.880284112  |
| Ti | -0.055260720 | 16.613677438 | 0.010443407  |
| Ti | 6.411881764  | 19.680394964 | 7.381460661  |

|    |              |              |              |
|----|--------------|--------------|--------------|
| Ti | 6.420486844  | 19.689150757 | 10.377038093 |
| Ti | 3.189862241  | 19.547638611 | 8.888553712  |
| Ti | 3.189936927  | 19.541691759 | 0.015052456  |
| Ti | 6.436872865  | 19.855411508 | 1.571489016  |
| Ti | 6.419764667  | 19.855739408 | 4.374744478  |
| Ti | 3.189455822  | 19.545868021 | 2.963297410  |
| Ti | 3.194564836  | 19.543549860 | 5.926345098  |
| Ti | -0.070697389 | 19.981851318 | 1.487888169  |
| Ti | -0.045016193 | 19.983672629 | 4.443401939  |
| Ti | 9.680956722  | 19.521028332 | 2.974719126  |
| Ti | 9.685492151  | 19.925953267 | 5.929646030  |
| Ti | -0.044511838 | 19.983746567 | 7.407167092  |
| Ti | -0.064476403 | 19.979965356 | 10.361451412 |
| Ti | 9.683855952  | 19.513251597 | 8.886574738  |
| Ti | 9.687047170  | 19.493855837 | 0.012421553  |
| O  | 0.000000000  | 1.266694833  | 2.957400000  |
| O  | 0.000000000  | 1.266694833  | 0.000000000  |
| O  | 0.000000000  | 1.266694833  | 8.872200000  |
| O  | 0.000000000  | 1.266694833  | 5.914800000  |
| O  | 6.494400000  | 1.266694833  | 2.957400000  |
| O  | 6.494400000  | 1.266694833  | 0.000000000  |
| O  | 6.494400000  | 1.266694833  | 8.872200000  |

|   |              |             |              |
|---|--------------|-------------|--------------|
| O | 6.494400000  | 1.266694833 | 5.914800000  |
| O | 9.741600000  | 1.980495667 | 8.872200000  |
| O | 9.741600000  | 1.980495667 | 5.914800000  |
| O | 9.741600000  | 1.980495667 | 2.957400000  |
| O | 9.741600000  | 1.980495667 | 0.000000000  |
| O | 3.247200000  | 1.980495667 | 8.872200000  |
| O | 3.247200000  | 1.980495667 | 5.914800000  |
| O | 3.247200000  | 1.980495667 | 2.957400000  |
| O | 3.247200000  | 1.980495667 | 0.000000000  |
| O | 1.266698949  | 3.247194072 | 1.478700000  |
| O | 1.266698949  | 3.247194072 | 4.436100000  |
| O | 5.227599738  | 3.247194072 | 1.478700000  |
| O | 5.227599738  | 3.247194072 | 4.436100000  |
| O | 1.266698949  | 3.247194072 | 7.393500000  |
| O | 1.266698949  | 3.247194072 | 10.350900000 |
| O | 5.227599738  | 3.247194072 | 7.393500000  |
| O | 5.227599738  | 3.247194072 | 10.350900000 |
| O | 7.761098949  | 3.247194072 | 1.478700000  |
| O | 7.761098949  | 3.247194072 | 4.436100000  |
| O | 11.721999738 | 3.247194072 | 1.478700000  |
| O | 11.721999738 | 3.247194072 | 4.436100000  |
| O | 7.761098949  | 3.247194072 | 7.393500000  |

|   |              |             |              |
|---|--------------|-------------|--------------|
| O | 7.761098949  | 3.247194072 | 10.350900000 |
| O | 11.721999738 | 3.247194072 | 7.393500000  |
| O | 11.721999738 | 3.247194072 | 10.350900000 |
| O | 9.741600000  | 4.513896049 | 8.872200000  |
| O | 9.741600000  | 4.513896049 | 5.914800000  |
| O | 9.741600000  | 4.513896049 | 2.957400000  |
| O | 9.741600000  | 4.513896049 | 0.000000000  |
| O | 3.247200000  | 4.513896049 | 8.872200000  |
| O | 3.247200000  | 4.513896049 | 5.914800000  |
| O | 3.247200000  | 4.513896049 | 2.957400000  |
| O | 3.247200000  | 4.513896049 | 0.000000000  |
| O | 0.000000000  | 5.227596870 | 2.957400000  |
| O | 0.000000000  | 5.227596870 | 0.000000000  |
| O | 0.000000000  | 5.227596870 | 8.872200000  |
| O | 0.000000000  | 5.227596870 | 5.914800000  |
| O | 6.494400000  | 5.227596870 | 0.000000000  |
| O | 6.494400000  | 5.227596870 | 2.957400000  |
| O | 6.494400000  | 5.227596870 | 8.872200000  |
| O | 6.494400000  | 5.227596870 | 5.914800000  |
| O | 8.474899752  | 6.494391717 | 7.393500000  |
| O | 11.008298949 | 6.494391717 | 7.393500000  |
| O | 8.474899752  | 6.494391717 | 10.350900000 |

|   |              |             |              |
|---|--------------|-------------|--------------|
| O | 11.008298949 | 6.494391717 | 10.350900000 |
| O | 8.474899752  | 6.494391717 | 1.478700000  |
| O | 11.008298949 | 6.494391717 | 1.478700000  |
| O | 8.474899752  | 6.494391717 | 4.436100000  |
| O | 11.008298949 | 6.494391717 | 4.436100000  |
| O | 1.980499752  | 6.494391717 | 1.478700000  |
| O | 4.513898949  | 6.494391717 | 1.478700000  |
| O | 1.980499752  | 6.494391717 | 4.436100000  |
| O | 4.513898949  | 6.494391717 | 4.436100000  |
| O | 1.980499752  | 6.494391717 | 7.393500000  |
| O | 4.513898949  | 6.494391717 | 7.393500000  |
| O | 1.980499752  | 6.494391717 | 10.350900000 |
| O | 4.513898949  | 6.494391717 | 10.350900000 |
| O | 0.000000000  | 7.761086550 | 8.872200000  |
| O | 0.000000000  | 7.761086550 | 5.914800000  |
| O | 6.494400000  | 7.761086550 | 2.957400000  |
| O | 6.494400000  | 7.761086550 | 0.000000000  |
| O | 0.000000000  | 7.761086550 | 2.957400000  |
| O | 0.000000000  | 7.761086550 | 0.000000000  |
| O | 6.494400000  | 7.761086550 | 8.872200000  |
| O | 6.494400000  | 7.761086550 | 5.914800000  |
| O | 3.247200000  | 8.474887384 | 2.957400000  |

|   |              |             |              |
|---|--------------|-------------|--------------|
| O | 3.247200000  | 8.474887384 | 0.000000000  |
| O | 3.247200000  | 8.474887384 | 8.872200000  |
| O | 3.247200000  | 8.474887384 | 5.914800000  |
| O | 9.741600000  | 8.474887384 | 2.957400000  |
| O | 9.741600000  | 8.474887384 | 0.000000000  |
| O | 9.741600000  | 8.474887384 | 8.872200000  |
| O | 9.741600000  | 8.474887384 | 5.914800000  |
| O | 1.270708332  | 9.782720831 | 1.481653851  |
| O | 1.269926796  | 9.782314706 | 4.439296003  |
| O | 5.211989669  | 9.774891946 | 1.483103332  |
| O | 5.211313731  | 9.774699064 | 4.439379757  |
| O | 1.269673254  | 9.782516161 | 7.396115406  |
| O | 1.270510772  | 9.783063376 | 10.353279524 |
| O | 5.210902116  | 9.774286867 | 7.397025221  |
| O | 5.211622475  | 9.774521540 | 10.356224148 |
| O | 7.759520680  | 9.783423423 | 1.482016547  |
| O | 7.758335062  | 9.784302824 | 4.440972139  |
| O | 11.701980361 | 9.774199355 | 1.481176882  |
| O | 11.701140115 | 9.775214846 | 4.438401922  |
| O | 7.757365448  | 9.784216742 | 7.396197031  |
| O | 7.758626531  | 9.782470084 | 10.355988148 |
| O | 11.700441577 | 9.775354507 | 7.397159132  |

|   |              |              |              |
|---|--------------|--------------|--------------|
| O | 11.701717337 | 9.774126131  | 10.354739533 |
| O | 9.725926935  | 11.069469725 | 2.958600941  |
| O | 9.726584687  | 11.061019330 | 0.002744467  |
| O | 3.243783816  | 11.066485048 | 2.959961818  |
| O | 3.243765631  | 11.066171078 | 0.002207522  |
| O | 3.243778360  | 11.066081423 | 8.873780316  |
| O | 3.244218811  | 11.066416467 | 5.916686585  |
| O | 9.725757820  | 11.068833927 | 8.876437718  |
| O | 9.726058381  | 11.070586657 | 5.917159295  |
| O | 6.463779164  | 11.797673521 | 8.878939205  |
| O | -0.026810702 | 11.788773424 | 2.959631417  |
| O | 6.462796561  | 11.801484735 | 0.012903018  |
| O | 6.461883059  | 11.803045297 | 5.914706073  |
| O | -0.026631716 | 11.788852006 | 0.002339185  |
| O | -0.025839529 | 11.788703058 | 5.917349279  |
| O | 6.464899318  | 11.809370770 | 2.964999808  |
| O | -0.027088662 | 11.789268489 | 8.874773293  |
| O | 8.436494208  | 13.086489829 | 1.484915982  |
| O | 8.436341850  | 13.086888096 | 4.444418456  |
| O | 10.970861201 | 13.101476439 | 1.484293981  |
| O | 10.971906540 | 13.100051966 | 4.443903159  |
| O | 1.958387489  | 13.085120364 | 1.483931759  |

|   |              |              |              |
|---|--------------|--------------|--------------|
| O | 1.959083689  | 13.086278730 | 4.441302303  |
| O | 4.490404028  | 13.107254697 | 1.483718590  |
| O | 4.491042298  | 13.109595005 | 4.441434558  |
| O | 1.959478159  | 13.085823313 | 7.398414607  |
| O | 1.958451654  | 13.084912479 | 10.355420445 |
| O | 4.491982168  | 13.105763787 | 7.399320045  |
| O | 4.491680698  | 13.103990698 | 10.355642250 |
| O | 8.435034007  | 13.082716119 | 7.398597256  |
| O | 8.435165844  | 13.082934720 | 10.356988104 |
| O | 10.972073576 | 13.099757642 | 7.397751913  |
| O | 10.970648315 | 13.101790409 | 10.357454426 |
| O | -0.025668856 | 14.395671668 | 2.969404205  |
| O | -0.027698226 | 14.395698457 | 5.925697309  |
| O | -0.025067605 | 14.395254827 | 8.883298649  |
| O | -0.026560018 | 14.394952287 | 0.012053534  |
| O | 6.461780317  | 14.425296270 | 2.963735342  |
| O | 6.462855270  | 14.420283469 | 5.926462921  |
| O | 6.461850587  | 14.402113227 | 8.879933719  |
| O | 6.463258183  | 14.418397150 | 0.003868043  |
| O | 9.684835697  | 15.091834115 | 8.865914579  |
| O | 3.195982434  | 15.096090745 | 8.882807602  |
| O | 9.682658514  | 15.098499633 | 5.926372661  |



|   |              |              |              |
|---|--------------|--------------|--------------|
| O | 9.683438751  | 15.095251349 | 2.985812806  |
| O | 3.197996607  | 15.099132573 | 2.967118135  |
| O | 9.683681382  | 15.080829099 | 0.012250734  |
| O | 3.197334308  | 15.096324704 | 0.010774281  |
| O | 3.197394187  | 15.098399262 | 5.924241085  |
| O | 1.235733650  | 16.447305243 | 10.363267492 |
| O | 5.155242381  | 16.438249055 | 4.443568500  |
| O | 5.154873369  | 16.430918807 | 7.407756679  |
| O | 7.725061783  | 16.448173215 | 1.487883318  |
| O | 7.712695536  | 16.457938425 | 4.440161811  |
| O | 5.158890025  | 16.433638807 | 10.361276215 |
| O | 11.655280429 | 16.431589609 | 1.489750739  |
| O | 11.662555586 | 16.439732821 | 4.443064559  |
| O | 1.236815227  | 16.456073180 | 4.447480785  |
| O | 1.236226965  | 16.450987155 | 1.489877434  |
| O | 5.159479457  | 16.442371739 | 1.482173880  |
| O | 7.711246116  | 16.453164584 | 7.410581114  |
| O | 7.724412603  | 16.438917357 | 10.356620676 |
| O | 1.235816259  | 16.451450788 | 7.402777719  |
| O | 11.662803672 | 16.439044516 | 7.410531548  |
| O | 11.656004814 | 16.428696015 | 10.363117729 |
| O | 3.198782559  | 17.724073542 | 8.882893722  |

|   |              |              |              |
|---|--------------|--------------|--------------|
| O | 3.198733202  | 17.719038238 | 0.009969277  |
| O | 9.692594297  | 17.705536109 | 2.952734051  |
| O | 9.681118692  | 17.699787854 | 5.929481007  |
| O | 3.207165791  | 17.724310716 | 2.967972942  |
| O | 3.201422793  | 17.721947191 | 5.926225028  |
| O | 9.692945514  | 17.698793081 | 8.903543235  |
| O | 9.681985564  | 17.689424351 | 0.008635963  |
| O | 6.437981718  | 18.496235965 | 0.001980630  |
| O | 6.396986468  | 18.484701236 | 5.930373314  |
| O | -0.051244972 | 18.483722536 | 0.010719037  |
| O | 6.424495837  | 18.489914421 | 2.961090125  |
| O | -0.056210721 | 18.491184230 | 5.928814764  |
| O | 6.422023549  | 18.486596842 | 8.893438509  |
| O | -0.052195493 | 18.486316091 | 8.884245372  |
| O | -0.059036174 | 18.487150129 | 2.972877375  |
| O | 1.978668721  | 19.919429554 | 4.445774483  |
| O | 4.442746043  | 19.919705661 | 1.477544840  |
| O | 4.440121786  | 19.940438740 | 4.462561751  |
| O | 1.985005307  | 19.932832027 | 7.407761766  |
| O | 1.982182971  | 19.926636214 | 10.360694554 |
| O | 4.452529727  | 19.917615744 | 7.404472072  |
| O | 4.453371271  | 19.902944176 | 10.363239456 |

|   |              |              |              |
|---|--------------|--------------|--------------|
| O | 8.442638430  | 19.920480049 | 1.480706892  |
| O | 8.418205199  | 19.833297534 | 4.420951842  |
| O | 10.902471662 | 19.896511545 | 1.485031793  |
| O | 10.904766523 | 19.943077300 | 4.423291737  |
| O | 8.408540882  | 19.843674253 | 7.456614465  |
| O | 8.433865145  | 19.931217172 | 10.362935435 |
| O | 10.904807438 | 19.938593140 | 7.439178699  |
| O | 10.901603750 | 19.902561625 | 10.370032367 |
| O | 1.974539451  | 19.911984291 | 1.492655497  |
| O | 6.452319535  | 21.061853433 | 2.968977038  |
| O | 6.541823538  | 21.132004783 | 5.946825566  |
| O | -0.047890875 | 21.093860134 | 2.965165304  |
| O | -0.053709337 | 21.089555283 | 5.927064811  |
| O | -0.048699947 | 21.093228979 | 8.887469766  |
| O | -0.057157474 | 21.091199070 | 0.011088949  |
| O | 6.427994760  | 21.110365157 | 8.884384015  |
| O | 6.438657266  | 21.144376050 | -0.002266788 |
| H | 0.000000000  | 0.932897449  | 9.814799089  |
| H | 0.816399334  | 0.932897449  | 8.400899272  |
| H | 6.457698847  | 0.932897449  | 6.856699960  |
| H | 0.834099172  | 0.932897449  | -0.439201108 |
| H | 0.000000000  | 0.932897449  | 3.899999089  |

|   |              |              |              |
|---|--------------|--------------|--------------|
| H | 0.816399334  | 0.932897449  | 2.486099272  |
| H | 6.457698847  | 0.932897449  | 0.941899960  |
| H | 0.834099172  | 0.932897449  | 5.475598892  |
| H | 6.494400000  | 0.932897449  | 9.814799089  |
| H | 7.310799334  | 0.932897449  | 8.400899272  |
| H | -0.036701153 | 0.932897449  | 6.856699960  |
| H | 7.328499172  | 0.932897449  | -0.439201108 |
| H | 6.494400000  | 0.932897449  | 3.899999089  |
| H | 7.310799334  | 0.932897449  | 2.486099272  |
| H | -0.036701153 | 0.932897449  | 0.941899960  |
| H | 7.328499172  | 0.932897449  | 5.475598892  |
| H | 7.170139333  | 21.785786668 | -0.001719787 |
| H | 7.184559498  | 21.720728129 | 8.856715172  |
| H | 9.347326405  | 21.631022783 | 5.942993249  |
| H | 7.404242839  | 21.613020420 | 5.945945917  |

TS3-3:

|    |             |             |              |
|----|-------------|-------------|--------------|
| Ti | 3.247200000 | 3.247190143 | 1.478700000  |
| Ti | 3.247200000 | 3.247190143 | 4.436100000  |
| Ti | 0.000000000 | 3.247190143 | 2.957400000  |
| Ti | 0.000000000 | 3.247190143 | 0.000000000  |
| Ti | 3.247200000 | 3.247190143 | 7.393500000  |
| Ti | 3.247200000 | 3.247190143 | 10.350900000 |

|    |             |             |              |
|----|-------------|-------------|--------------|
| Ti | 0.000000000 | 3.247190143 | 8.872200000  |
| Ti | 0.000000000 | 3.247190143 | 5.914800000  |
| Ti | 9.741600000 | 3.247190143 | 1.478700000  |
| Ti | 9.741600000 | 3.247190143 | 4.436100000  |
| Ti | 6.494400000 | 3.247190143 | 2.957400000  |
| Ti | 6.494400000 | 3.247190143 | 0.000000000  |
| Ti | 9.741600000 | 3.247190143 | 7.393500000  |
| Ti | 9.741600000 | 3.247190143 | 10.350900000 |
| Ti | 6.494400000 | 3.247190143 | 8.872200000  |
| Ti | 6.494400000 | 3.247190143 | 5.914800000  |
| Ti | 0.000000000 | 6.494389931 | 4.436100000  |
| Ti | 0.000000000 | 6.494389931 | 1.478700000  |
| Ti | 3.247200000 | 6.494389931 | 2.957400000  |
| Ti | 3.247200000 | 6.494389931 | 0.000000000  |
| Ti | 0.000000000 | 6.494389931 | 10.350900000 |
| Ti | 0.000000000 | 6.494389931 | 7.393500000  |
| Ti | 3.247200000 | 6.494389931 | 8.872200000  |
| Ti | 3.247200000 | 6.494389931 | 5.914800000  |
| Ti | 6.494400000 | 6.494389931 | 4.436100000  |
| Ti | 6.494400000 | 6.494389931 | 1.478700000  |
| Ti | 9.741600000 | 6.494389931 | 2.957400000  |
| Ti | 9.741600000 | 6.494389931 | 0.000000000  |

|    |              |              |              |
|----|--------------|--------------|--------------|
| Ti | 6.494400000  | 6.494389931  | 10.350900000 |
| Ti | 6.494400000  | 6.494389931  | 7.393500000  |
| Ti | 9.741600000  | 6.494389931  | 8.872200000  |
| Ti | 9.741600000  | 6.494389931  | 5.914800000  |
| Ti | 3.228439886  | 9.736278664  | 1.478490734  |
| Ti | 3.225561179  | 9.734088733  | 4.436125907  |
| Ti | -0.010018391 | 9.835723145  | 2.961272538  |
| Ti | -0.013014388 | 9.836296077  | 0.002614696  |
| Ti | 3.225775494  | 9.735469272  | 7.393866599  |
| Ti | 3.226097097  | 9.735605718  | 10.351182373 |
| Ti | -0.013948413 | 9.836233926  | 8.874651211  |
| Ti | -0.018001568 | 9.834936256  | 5.919906010  |
| Ti | 9.741686635  | 9.731201211  | 1.487288171  |
| Ti | 9.737620362  | 9.747483706  | 4.442134634  |
| Ti | 6.486743362  | 9.785136505  | 2.962058851  |
| Ti | 6.482553175  | 9.762521751  | 0.008117353  |
| Ti | 9.731137911  | 9.750283359  | 7.391467556  |
| Ti | 9.738381245  | 9.730612206  | 10.344470376 |
| Ti | 6.481191430  | 9.759743886  | 8.879223707  |
| Ti | 6.476040721  | 9.764891705  | 5.916956891  |
| Ti | -0.030396260 | 13.169278196 | 1.505819831  |
| Ti | -0.026074886 | 13.170172956 | 4.463555082  |

|    |              |              |              |
|----|--------------|--------------|--------------|
| Ti | 3.216144039  | 12.987110713 | 2.959957323  |
| Ti | 3.215675793  | 12.987418254 | 5.918189890  |
| Ti | 6.464536281  | 13.121701594 | 1.508837562  |
| Ti | 6.466107796  | 13.130560256 | 4.437601768  |
| Ti | 9.715824636  | 13.006317163 | 2.967386312  |
| Ti | 9.714276371  | 13.015840199 | 5.921143268  |
| Ti | -0.028384814 | 13.171098077 | 7.418124140  |
| Ti | -0.033742305 | 13.169557161 | 10.376084982 |
| Ti | 3.214208578  | 12.988349090 | 8.875923603  |
| Ti | 3.212393133  | 12.989125978 | 0.002129801  |
| Ti | 6.463019319  | 13.061320811 | 7.387353340  |
| Ti | 6.463554717  | 13.056489463 | 10.382324386 |
| Ti | 9.709823290  | 13.008380648 | 8.874866155  |
| Ti | 9.711100869  | 12.972503082 | 0.007278871  |
| Ti | 9.708888227  | 16.258755138 | 1.508213314  |
| Ti | 9.698841130  | 16.371883915 | 4.487636954  |
| Ti | 6.441999284  | 16.484628714 | 2.960198410  |
| Ti | -0.054362934 | 16.638675005 | 5.922181197  |
| Ti | 3.181548890  | 16.298953271 | 1.487333715  |
| Ti | 3.177343766  | 16.299776236 | 4.446450190  |
| Ti | -0.055855477 | 16.625437196 | 2.965455603  |
| Ti | 6.434003769  | 16.421302902 | 5.917936382  |

|    |              |              |              |
|----|--------------|--------------|--------------|
| Ti | 3.178320004  | 16.300396318 | 7.404989736  |
| Ti | 3.186500610  | 16.302325500 | 10.360663679 |
| Ti | -0.055182008 | 16.624876408 | 8.880138371  |
| Ti | 6.451724129  | 16.401040242 | 0.007069014  |
| Ti | 9.697105567  | 16.371732467 | 7.358809461  |
| Ti | 9.707225141  | 16.253440155 | 10.339002971 |
| Ti | 6.442320367  | 16.323079295 | 8.879379739  |
| Ti | -0.046832937 | 16.619290318 | 0.006557620  |
| Ti | 6.416501750  | 19.707638183 | 7.351469431  |
| Ti | 6.424952913  | 19.669509250 | 10.365261489 |
| Ti | 3.202061712  | 19.549212389 | 8.879255647  |
| Ti | 3.192679382  | 19.541831420 | 0.010877672  |
| Ti | 6.438837550  | 19.854473528 | 1.575228708  |
| Ti | 6.421919509  | 19.900523501 | 4.412018128  |
| Ti | 3.199351859  | 19.548266550 | 2.965311045  |
| Ti | 3.172831586  | 19.546727777 | 5.920858648  |
| Ti | -0.059065399 | 19.987214165 | 1.479401022  |
| Ti | -0.067118195 | 19.999350758 | 4.438303618  |
| Ti | 9.704124584  | 19.525480345 | 2.958200391  |
| Ti | 9.631201565  | 19.725436591 | 5.923888563  |
| Ti | -0.064473546 | 20.001324231 | 7.398953564  |
| Ti | -0.050665022 | 19.989062622 | 10.357571185 |



|    |             |              |             |
|----|-------------|--------------|-------------|
| Ti | 9.711464036 | 19.515740138 | 8.889416090 |
| Ti | 9.681062580 | 19.505684890 | 0.005426001 |
| O  | 0.000000000 | 1.266689833  | 2.957400000 |
| O  | 0.000000000 | 1.266689833  | 0.000000000 |
| O  | 0.000000000 | 1.266689833  | 8.872200000 |
| O  | 0.000000000 | 1.266689833  | 5.914800000 |
| O  | 6.494400000 | 1.266689833  | 2.957400000 |
| O  | 6.494400000 | 1.266689833  | 0.000000000 |
| O  | 6.494400000 | 1.266689833  | 8.872200000 |
| O  | 6.494400000 | 1.266689833  | 5.914800000 |
| O  | 9.741600000 | 1.980499953  | 8.872200000 |
| O  | 9.741600000 | 1.980499953  | 5.914800000 |
| O  | 9.741600000 | 1.980499953  | 2.957400000 |
| O  | 9.741600000 | 1.980499953  | 0.000000000 |
| O  | 3.247200000 | 1.980499953  | 8.872200000 |
| O  | 3.247200000 | 1.980499953  | 5.914800000 |
| O  | 3.247200000 | 1.980499953  | 2.957400000 |
| O  | 3.247200000 | 1.980499953  | 0.000000000 |
| O  | 1.266699988 | 3.247190143  | 1.478700000 |
| O  | 1.266699988 | 3.247190143  | 4.436100000 |
| O  | 5.227599998 | 3.247190143  | 1.478700000 |
| O  | 5.227599998 | 3.247190143  | 4.436100000 |

|   |              |             |              |
|---|--------------|-------------|--------------|
| O | 1.266699988  | 3.247190143 | 7.393500000  |
| O | 1.266699988  | 3.247190143 | 10.350900000 |
| O | 5.227599998  | 3.247190143 | 7.393500000  |
| O | 5.227599998  | 3.247190143 | 10.350900000 |
| O | 7.761099988  | 3.247190143 | 1.478700000  |
| O | 7.761099988  | 3.247190143 | 4.436100000  |
| O | 11.721999998 | 3.247190143 | 1.478700000  |
| O | 11.721999998 | 3.247190143 | 4.436100000  |
| O | 7.761099988  | 3.247190143 | 7.393500000  |
| O | 7.761099988  | 3.247190143 | 10.350900000 |
| O | 11.721999998 | 3.247190143 | 7.393500000  |
| O | 11.721999998 | 3.247190143 | 10.350900000 |
| O | 9.741600000  | 4.513899978 | 8.872200000  |
| O | 9.741600000  | 4.513899978 | 5.914800000  |
| O | 9.741600000  | 4.513899978 | 2.957400000  |
| O | 9.741600000  | 4.513899978 | 0.000000000  |
| O | 3.247200000  | 4.513899978 | 8.872200000  |
| O | 3.247200000  | 4.513899978 | 5.914800000  |
| O | 3.247200000  | 4.513899978 | 2.957400000  |
| O | 3.247200000  | 4.513899978 | 0.000000000  |
| O | 0.000000000  | 5.227600085 | 2.957400000  |
| O | 0.000000000  | 5.227600085 | 0.000000000  |

|   |              |             |              |
|---|--------------|-------------|--------------|
| O | 0.000000000  | 5.227600085 | 8.872200000  |
| O | 0.000000000  | 5.227600085 | 5.914800000  |
| O | 6.494400000  | 5.227600085 | 0.000000000  |
| O | 6.494400000  | 5.227600085 | 2.957400000  |
| O | 6.494400000  | 5.227600085 | 8.872200000  |
| O | 6.494400000  | 5.227600085 | 5.914800000  |
| O | 8.474900012  | 6.494389931 | 7.393500000  |
| O | 11.008299988 | 6.494389931 | 7.393500000  |
| O | 8.474900012  | 6.494389931 | 10.350900000 |
| O | 11.008299988 | 6.494389931 | 10.350900000 |
| O | 8.474900012  | 6.494389931 | 1.478700000  |
| O | 11.008299988 | 6.494389931 | 1.478700000  |
| O | 8.474900012  | 6.494389931 | 4.436100000  |
| O | 11.008299988 | 6.494389931 | 4.436100000  |
| O | 1.980500012  | 6.494389931 | 1.478700000  |
| O | 4.513899988  | 6.494389931 | 1.478700000  |
| O | 1.980500012  | 6.494389931 | 4.436100000  |
| O | 4.513899988  | 6.494389931 | 4.436100000  |
| O | 1.980500012  | 6.494389931 | 7.393500000  |
| O | 4.513899988  | 6.494389931 | 7.393500000  |
| O | 1.980500012  | 6.494389931 | 10.350900000 |
| O | 4.513899988  | 6.494389931 | 10.350900000 |

|   |             |             |              |
|---|-------------|-------------|--------------|
| O | 0.000000000 | 7.761090122 | 8.872200000  |
| O | 0.000000000 | 7.761090122 | 5.914800000  |
| O | 6.494400000 | 7.761090122 | 2.957400000  |
| O | 6.494400000 | 7.761090122 | 0.000000000  |
| O | 0.000000000 | 7.761090122 | 2.957400000  |
| O | 0.000000000 | 7.761090122 | 0.000000000  |
| O | 6.494400000 | 7.761090122 | 8.872200000  |
| O | 6.494400000 | 7.761090122 | 5.914800000  |
| O | 3.247200000 | 8.474889884 | 2.957400000  |
| O | 3.247200000 | 8.474889884 | 0.000000000  |
| O | 3.247200000 | 8.474889884 | 8.872200000  |
| O | 3.247200000 | 8.474889884 | 5.914800000  |
| O | 9.741600000 | 8.474889884 | 2.957400000  |
| O | 9.741600000 | 8.474889884 | 0.000000000  |
| O | 9.741600000 | 8.474889884 | 8.872200000  |
| O | 9.741600000 | 8.474889884 | 5.914800000  |
| O | 1.271267630 | 9.783887055 | 1.479833394  |
| O | 1.270517786 | 9.783392705 | 4.438452316  |
| O | 5.212230741 | 9.776665393 | 1.481979283  |
| O | 5.211398808 | 9.776246410 | 4.437297984  |
| O | 1.269871464 | 9.783333769 | 7.394637534  |
| O | 1.270441932 | 9.783721677 | 10.352063323 |

|   |              |              |              |
|---|--------------|--------------|--------------|
| O | 5.210762617  | 9.774169351  | 7.396755506  |
| O | 5.211540776  | 9.774497966  | 10.354362761 |
| O | 7.759940088  | 9.783924560  | 1.480433273  |
| O | 7.758331945  | 9.785695864  | 4.439915164  |
| O | 11.702352620 | 9.775402370  | 1.480194078  |
| O | 11.701592515 | 9.776611815  | 4.436572474  |
| O | 7.757133598  | 9.783978139  | 7.395484179  |
| O | 7.758840197  | 9.782455082  | 10.354283384 |
| O | 11.700457554 | 9.776673966  | 7.395754603  |
| O | 11.701643301 | 9.775242349  | 10.352828580 |
| O | 9.726324782  | 11.069912283 | 2.957348305  |
| O | 9.727046309  | 11.062899577 | 0.001744511  |
| O | 3.244241021  | 11.066323598 | 2.959446757  |
| O | 3.243780309  | 11.066143574 | 0.001350822  |
| O | 3.243960853  | 11.066028559 | 8.873361075  |
| O | 3.244297393  | 11.066236086 | 5.916467027  |
| O | 9.724976804  | 11.069458295 | 8.876195802  |
| O | 9.725789383  | 11.072380821 | 5.916699479  |
| O | 6.465284436  | 11.800496748 | 8.877739802  |
| O | -0.026629378 | 11.790516867 | 2.958102678  |
| O | 6.465296515  | 11.803798968 | 0.009876651  |
| O | 6.462964506  | 11.806238216 | 5.916111311  |

|   |              |              |              |
|---|--------------|--------------|--------------|
| O | -0.028396115 | 11.790756899 | 0.000877401  |
| O | -0.026840316 | 11.790355775 | 5.915621211  |
| O | 6.467098062  | 11.811489977 | 2.962449820  |
| O | -0.027508070 | 11.790942637 | 8.873538992  |
| O | 8.439869348  | 13.091893038 | 1.483968549  |
| O | 8.439330183  | 13.089977787 | 4.442312669  |
| O | 10.972145663 | 13.105372665 | 1.483127110  |
| O | 10.973199964 | 13.103083436 | 4.442767991  |
| O | 1.958737018  | 13.084601724 | 1.483814646  |
| O | 1.959607267  | 13.085650433 | 4.439697736  |
| O | 4.489864603  | 13.109464988 | 1.481005471  |
| O | 4.490268945  | 13.110687291 | 4.441325962  |
| O | 1.958903794  | 13.085678651 | 7.397273879  |
| O | 1.957894954  | 13.084764245 | 10.353851958 |
| O | 4.490719007  | 13.107981579 | 7.398312754  |
| O | 4.490651205  | 13.106843215 | 10.354684644 |
| O | 8.436957129  | 13.087020256 | 7.397707789  |
| O | 8.437532663  | 13.088841209 | 10.354724628 |
| O | 10.972205931 | 13.102710530 | 7.396524356  |
| O | 10.970791841 | 13.106269211 | 10.355535547 |
| O | -0.026241403 | 14.399061041 | 2.967402755  |
| O | -0.024924338 | 14.398644558 | 5.923110176  |

|   |              |              |              |
|---|--------------|--------------|--------------|
| O | -0.026367264 | 14.398908521 | 8.879771062  |
| O | -0.020203689 | 14.397567274 | 0.009441440  |
| O | 6.464277934  | 14.421888323 | 2.962280775  |
| O | 6.467548773  | 14.419162965 | 5.924869474  |
| O | 6.463354040  | 14.407156032 | 8.878554388  |
| O | 6.468384603  | 14.417957093 | 0.001361705  |
| O | 9.690070833  | 15.097723459 | 8.858120410  |
| O | 3.192060855  | 15.098625721 | 8.880270626  |
| O | 9.683732168  | 15.108382716 | 5.921883446  |
| O | 9.688482822  | 15.102024738 | 2.986444389  |
| O | 3.193759011  | 15.100779218 | 2.965813803  |
| O | 9.691193844  | 15.086706299 | 0.010039545  |
| O | 3.189782750  | 15.098236741 | 0.008346019  |
| O | 3.189500763  | 15.100451675 | 5.922392592  |
| O | 1.237850824  | 16.461074551 | 10.353174004 |
| O | 5.157141473  | 16.423990398 | 4.440310155  |
| O | 5.155680623  | 16.420285268 | 7.402598973  |
| O | 7.731021824  | 16.447488839 | 1.488749127  |
| O | 7.719280598  | 16.465242955 | 4.436103904  |
| O | 5.160237613  | 16.423497118 | 10.363787048 |
| O | 11.661489335 | 16.431785706 | 1.482413548  |
| O | 11.659439443 | 16.449359084 | 4.447744940  |

|   |              |              |              |
|---|--------------|--------------|--------------|
| O | 1.235669096  | 16.467852940 | 4.442310067  |
| O | 1.238536373  | 16.462876216 | 1.492872925  |
| O | 5.161348545  | 16.431742844 | 1.476303678  |
| O | 7.718496335  | 16.460490903 | 7.407715630  |
| O | 7.731673602  | 16.439870339 | 10.351772433 |
| O | 1.234786766  | 16.465529421 | 7.401107024  |
| O | 11.660622463 | 16.447303815 | 7.397755344  |
| O | 11.662706775 | 16.427830902 | 10.363796157 |
| O | 3.209301929  | 17.724504313 | 8.878103562  |
| O | 3.201501765  | 17.718059895 | 0.008028750  |
| O | 9.724144482  | 17.706314068 | 2.941999754  |
| O | 9.669861299  | 17.755237632 | 5.926067221  |
| O | 3.217297315  | 17.725584812 | 2.968324872  |
| O | 3.203249668  | 17.723448460 | 5.922329777  |
| O | 9.730333125  | 17.697774018 | 8.906850200  |
| O | 9.686440723  | 17.694672897 | 0.005085072  |
| O | 6.442828749  | 18.485469551 | -0.001281855 |
| O | 6.375585601  | 18.465232967 | 5.920198675  |
| O | -0.045141535 | 18.491233165 | 0.006968108  |
| O | 6.399475252  | 18.479471621 | 2.948127368  |
| O | -0.070515806 | 18.507294559 | 5.925009536  |
| O | 6.390444269  | 18.474160924 | 8.900275190  |



|   |              |              |              |
|---|--------------|--------------|--------------|
| O | -0.077018518 | 18.498715576 | 8.875685355  |
| O | -0.079513407 | 18.497583641 | 2.971899422  |
| O | 1.965094126  | 19.913203736 | 4.436708633  |
| O | 4.439763814  | 19.919167734 | 1.472343956  |
| O | 4.431222250  | 19.964544404 | 4.466829634  |
| O | 1.971293810  | 19.924999928 | 7.408550327  |
| O | 1.982676805  | 19.924715962 | 10.351381465 |
| O | 4.442689672  | 19.932216946 | 7.391669606  |
| O | 4.447452794  | 19.902765223 | 10.364928959 |
| O | 8.446077085  | 19.918912700 | 1.479221567  |
| O | 8.405585670  | 19.743536466 | 4.361238151  |
| O | 10.908706286 | 19.913583072 | 1.462343922  |
| O | 10.880497210 | 19.971886439 | 4.448793989  |
| O | 8.397037611  | 19.729294597 | 7.503656407  |
| O | 8.438303808  | 19.925776815 | 10.353328735 |
| O | 10.879200668 | 19.978436942 | 7.401300438  |
| O | 10.908861113 | 19.920199297 | 10.382730023 |
| O | 1.976499202  | 19.912199319 | 1.495042592  |
| O | 6.450375242  | 21.062692114 | 2.964020436  |
| O | 6.706473333  | 21.068374289 | 5.949526146  |
| O | -0.056984853 | 21.102558418 | 2.958297867  |
| O | -0.052510082 | 21.107924123 | 5.920394691  |

|   |              |              |              |
|---|--------------|--------------|--------------|
| O | -0.056090055 | 21.104379729 | 8.882585206  |
| O | -0.040453488 | 21.101056078 | 0.005990628  |
| O | 6.423270733  | 21.099019382 | 8.877463226  |
| O | 6.430578232  | 21.129298357 | -0.005536844 |
| H | 0.000000000  | 0.932899949  | 9.814800036  |
| H | 0.816399984  | 0.932899949  | 8.400899982  |
| H | 6.457700016  | 0.932899949  | 6.856699960  |
| H | 0.834099951  | 0.932899949  | -0.439200043 |
| H | 0.000000000  | 0.932899949  | 3.900000036  |
| H | 0.816399984  | 0.932899949  | 2.486099982  |
| H | 6.457700016  | 0.932899949  | 0.941899960  |
| H | 0.834099951  | 0.932899949  | 5.475599957  |
| H | 6.494400000  | 0.932899949  | 9.814800036  |
| H | 7.310799984  | 0.932899949  | 8.400899982  |
| H | -0.036699984 | 0.932899949  | 6.856699960  |
| H | 7.328499951  | 0.932899949  | -0.439200043 |
| H | 6.494400000  | 0.932899949  | 3.900000036  |
| H | 7.310799984  | 0.932899949  | 2.486099982  |
| H | -0.036699984 | 0.932899949  | 0.941899960  |
| H | 7.328499951  | 0.932899949  | 5.475599957  |
| H | 7.135542235  | 21.798921606 | -0.005901669 |
| H | 7.150611711  | 21.742781023 | 8.849288904  |

|   |             |              |             |
|---|-------------|--------------|-------------|
| H | 8.900537273 | 21.487556452 | 5.953394188 |
|---|-------------|--------------|-------------|

|   |             |              |             |
|---|-------------|--------------|-------------|
| H | 7.851298891 | 21.370658251 | 5.951654409 |
|---|-------------|--------------|-------------|

TS4-1:

|    |             |             |             |
|----|-------------|-------------|-------------|
| Ti | 3.247200000 | 3.247190143 | 1.478700000 |
|----|-------------|-------------|-------------|

|    |             |             |             |
|----|-------------|-------------|-------------|
| Ti | 3.247200000 | 3.247190143 | 4.436100000 |
|----|-------------|-------------|-------------|

|    |             |             |             |
|----|-------------|-------------|-------------|
| Ti | 0.000000000 | 3.247190143 | 2.957400000 |
|----|-------------|-------------|-------------|

|    |             |             |             |
|----|-------------|-------------|-------------|
| Ti | 0.000000000 | 3.247190143 | 0.000000000 |
|----|-------------|-------------|-------------|

|    |             |             |             |
|----|-------------|-------------|-------------|
| Ti | 3.247200000 | 3.247190143 | 7.393500000 |
|----|-------------|-------------|-------------|

|    |             |             |              |
|----|-------------|-------------|--------------|
| Ti | 3.247200000 | 3.247190143 | 10.350900000 |
|----|-------------|-------------|--------------|

|    |             |             |             |
|----|-------------|-------------|-------------|
| Ti | 0.000000000 | 3.247190143 | 8.872200000 |
|----|-------------|-------------|-------------|

|    |             |             |             |
|----|-------------|-------------|-------------|
| Ti | 0.000000000 | 3.247190143 | 5.914800000 |
|----|-------------|-------------|-------------|

|    |             |             |             |
|----|-------------|-------------|-------------|
| Ti | 9.741600000 | 3.247190143 | 1.478700000 |
|----|-------------|-------------|-------------|

|    |             |             |             |
|----|-------------|-------------|-------------|
| Ti | 9.741600000 | 3.247190143 | 4.436100000 |
|----|-------------|-------------|-------------|

|    |             |             |             |
|----|-------------|-------------|-------------|
| Ti | 6.494400000 | 3.247190143 | 2.957400000 |
|----|-------------|-------------|-------------|

|    |             |             |             |
|----|-------------|-------------|-------------|
| Ti | 6.494400000 | 3.247190143 | 0.000000000 |
|----|-------------|-------------|-------------|

|    |             |             |             |
|----|-------------|-------------|-------------|
| Ti | 9.741600000 | 3.247190143 | 7.393500000 |
|----|-------------|-------------|-------------|

|    |             |             |              |
|----|-------------|-------------|--------------|
| Ti | 9.741600000 | 3.247190143 | 10.350900000 |
|----|-------------|-------------|--------------|

|    |             |             |             |
|----|-------------|-------------|-------------|
| Ti | 6.494400000 | 3.247190143 | 8.872200000 |
|----|-------------|-------------|-------------|

|    |             |             |             |
|----|-------------|-------------|-------------|
| Ti | 6.494400000 | 3.247190143 | 5.914800000 |
|----|-------------|-------------|-------------|

|    |             |             |             |
|----|-------------|-------------|-------------|
| Ti | 0.000000000 | 6.494389931 | 4.436100000 |
|----|-------------|-------------|-------------|

|    |             |             |             |
|----|-------------|-------------|-------------|
| Ti | 0.000000000 | 6.494389931 | 1.478700000 |
|----|-------------|-------------|-------------|

|    |             |             |             |
|----|-------------|-------------|-------------|
| Ti | 3.247200000 | 6.494389931 | 2.957400000 |
|----|-------------|-------------|-------------|

|    |              |             |              |
|----|--------------|-------------|--------------|
| Ti | 3.247200000  | 6.494389931 | 0.000000000  |
| Ti | 0.000000000  | 6.494389931 | 10.350900000 |
| Ti | 0.000000000  | 6.494389931 | 7.393500000  |
| Ti | 3.247200000  | 6.494389931 | 8.872200000  |
| Ti | 3.247200000  | 6.494389931 | 5.914800000  |
| Ti | 6.494400000  | 6.494389931 | 4.436100000  |
| Ti | 6.494400000  | 6.494389931 | 1.478700000  |
| Ti | 9.741600000  | 6.494389931 | 2.957400000  |
| Ti | 9.741600000  | 6.494389931 | 0.000000000  |
| Ti | 6.494400000  | 6.494389931 | 10.350900000 |
| Ti | 6.494400000  | 6.494389931 | 7.393500000  |
| Ti | 9.741600000  | 6.494389931 | 8.872200000  |
| Ti | 9.741600000  | 6.494389931 | 5.914800000  |
| Ti | 3.225136445  | 9.736938750 | 1.477400282  |
| Ti | 3.225476492  | 9.734687741 | 4.436186829  |
| Ti | -0.016096241 | 9.833389267 | 2.966416639  |
| Ti | -0.013264552 | 9.834019350 | 0.007524572  |
| Ti | 3.225935256  | 9.736500836 | 7.394908077  |
| Ti | 3.226427272  | 9.738918296 | 10.351212420 |
| Ti | -0.015866988 | 9.833583936 | 8.879921653  |
| Ti | -0.016359523 | 9.833519999 | 5.923559109  |
| Ti | 9.736878831  | 9.735847178 | 1.482314534  |

|    |              |              |              |
|----|--------------|--------------|--------------|
| Ti | 9.732501865  | 9.739354782  | 4.438767338  |
| Ti | 6.478776682  | 9.754459621  | 2.959270970  |
| Ti | 6.481112977  | 9.752103241  | 0.007222799  |
| Ti | 9.732234166  | 9.738482167  | 7.394816280  |
| Ti | 9.735100794  | 9.736652284  | 10.352688162 |
| Ti | 6.479724864  | 9.751336712  | 8.880386556  |
| Ti | 6.479446384  | 9.738718627  | 5.919982548  |
| Ti | -0.028221805 | 13.170573366 | 1.511097016  |
| Ti | -0.027308173 | 13.173451600 | 4.469133803  |
| Ti | 3.216913885  | 12.988238719 | 2.961720288  |
| Ti | 3.217092871  | 12.988579120 | 5.918950415  |
| Ti | 6.463649795  | 13.111663490 | 1.459176192  |
| Ti | 6.466135202  | 13.024457401 | 4.416457777  |
| Ti | 9.714714873  | 12.994235220 | 2.965668299  |
| Ti | 9.714435873  | 12.996679112 | 5.922340187  |
| Ti | -0.028212323 | 13.170665521 | 7.425619848  |
| Ti | -0.030727994 | 13.173240501 | 10.382295049 |
| Ti | 3.216571370  | 12.994104846 | 8.876969103  |
| Ti | 3.213271176  | 12.995432877 | 0.002325226  |
| Ti | 6.465177668  | 13.020322216 | 7.408928164  |
| Ti | 6.464940752  | 13.081066260 | 10.388619508 |
| Ti | 9.714094657  | 12.993695149 | 8.880427369  |

|    |              |              |              |
|----|--------------|--------------|--------------|
| Ti | 9.714217272  | 12.990161828 | 0.008397242  |
| Ti | 9.716343668  | 16.302624825 | 1.482926834  |
| Ti | 9.701394598  | 16.320781494 | 4.441140474  |
| Ti | 6.447462503  | 16.331080703 | 2.947359272  |
| Ti | -0.042611057 | 16.627674632 | 5.920707347  |
| Ti | 3.177407411  | 16.303965001 | 1.484411094  |
| Ti | 3.196650188  | 16.306433539 | 4.444121415  |
| Ti | -0.047606420 | 16.626624852 | 2.968487411  |
| Ti | 6.453272783  | 16.278725616 | 5.924848890  |
| Ti | 3.194667448  | 16.305232310 | 7.402708989  |
| Ti | 3.195418071  | 16.324280881 | 10.356970004 |
| Ti | -0.041818870 | 16.628928368 | 8.876759838  |
| Ti | 6.451201719  | 16.454102207 | 0.009056269  |
| Ti | 9.711170099  | 16.308361649 | 7.396678140  |
| Ti | 9.709953568  | 16.312940822 | 10.354599234 |
| Ti | 6.452295766  | 16.296012171 | 8.881207886  |
| Ti | -0.044447544 | 16.626889172 | 0.002980823  |
| Ti | 6.451864667  | 19.735006061 | 7.518403305  |
| Ti | 6.434421488  | 19.769099107 | 10.468538156 |
| Ti | 3.221336572  | 19.576729215 | 8.873045816  |
| Ti | 3.206349575  | 19.563101355 | 0.008942941  |
| Ti | 6.436700763  | 20.013042555 | 1.635837427  |

|    |              |              |              |
|----|--------------|--------------|--------------|
| Ti | 6.434633336  | 19.498520735 | 4.439194150  |
| Ti | 3.197299238  | 19.550066072 | 2.963413222  |
| Ti | 3.181288984  | 19.540561968 | 5.922321141  |
| Ti | -0.049573833 | 19.992522362 | 1.482811614  |
| Ti | -0.060583920 | 19.999913332 | 4.441771702  |
| Ti | 9.680504711  | 19.557669927 | 2.965467077  |
| Ti | 9.680029451  | 19.558003543 | 5.924711667  |
| Ti | -0.050568775 | 19.994839452 | 7.402819714  |
| Ti | -0.040464009 | 19.992258756 | 10.356441576 |
| Ti | 9.693245425  | 19.566605029 | 8.882969904  |
| Ti | 9.689048095  | 19.555349980 | 0.011593126  |
| O  | 0.000000000  | 1.266689833  | 2.957400000  |
| O  | 0.000000000  | 1.266689833  | 0.000000000  |
| O  | 0.000000000  | 1.266689833  | 8.872200000  |
| O  | 0.000000000  | 1.266689833  | 5.914800000  |
| O  | 6.494400000  | 1.266689833  | 2.957400000  |
| O  | 6.494400000  | 1.266689833  | 0.000000000  |
| O  | 6.494400000  | 1.266689833  | 8.872200000  |
| O  | 6.494400000  | 1.266689833  | 5.914800000  |
| O  | 9.741600000  | 1.980499953  | 8.872200000  |
| O  | 9.741600000  | 1.980499953  | 5.914800000  |
| O  | 9.741600000  | 1.980499953  | 2.957400000  |

|   |              |             |              |
|---|--------------|-------------|--------------|
| O | 9.741600000  | 1.980499953 | 0.000000000  |
| O | 3.247200000  | 1.980499953 | 8.872200000  |
| O | 3.247200000  | 1.980499953 | 5.914800000  |
| O | 3.247200000  | 1.980499953 | 2.957400000  |
| O | 3.247200000  | 1.980499953 | 0.000000000  |
| O | 1.266699988  | 3.247190143 | 1.478700000  |
| O | 1.266699988  | 3.247190143 | 4.436100000  |
| O | 5.227599998  | 3.247190143 | 1.478700000  |
| O | 5.227599998  | 3.247190143 | 4.436100000  |
| O | 1.266699988  | 3.247190143 | 7.393500000  |
| O | 1.266699988  | 3.247190143 | 10.350900000 |
| O | 5.227599998  | 3.247190143 | 7.393500000  |
| O | 5.227599998  | 3.247190143 | 10.350900000 |
| O | 7.761099988  | 3.247190143 | 1.478700000  |
| O | 7.761099988  | 3.247190143 | 4.436100000  |
| O | 11.721999998 | 3.247190143 | 1.478700000  |
| O | 11.721999998 | 3.247190143 | 4.436100000  |
| O | 7.761099988  | 3.247190143 | 7.393500000  |
| O | 7.761099988  | 3.247190143 | 10.350900000 |
| O | 11.721999998 | 3.247190143 | 7.393500000  |
| O | 11.721999998 | 3.247190143 | 10.350900000 |
| O | 9.741600000  | 4.513899978 | 8.872200000  |



|   |              |             |              |
|---|--------------|-------------|--------------|
| O | 9.741600000  | 4.513899978 | 5.914800000  |
| O | 9.741600000  | 4.513899978 | 2.957400000  |
| O | 9.741600000  | 4.513899978 | 0.000000000  |
| O | 3.247200000  | 4.513899978 | 8.872200000  |
| O | 3.247200000  | 4.513899978 | 5.914800000  |
| O | 3.247200000  | 4.513899978 | 2.957400000  |
| O | 3.247200000  | 4.513899978 | 0.000000000  |
| O | 0.000000000  | 5.227600085 | 2.957400000  |
| O | 0.000000000  | 5.227600085 | 0.000000000  |
| O | 0.000000000  | 5.227600085 | 8.872200000  |
| O | 0.000000000  | 5.227600085 | 5.914800000  |
| O | 6.494400000  | 5.227600085 | 0.000000000  |
| O | 6.494400000  | 5.227600085 | 2.957400000  |
| O | 6.494400000  | 5.227600085 | 8.872200000  |
| O | 6.494400000  | 5.227600085 | 5.914800000  |
| O | 8.474900012  | 6.494389931 | 7.393500000  |
| O | 11.008299988 | 6.494389931 | 7.393500000  |
| O | 8.474900012  | 6.494389931 | 10.350900000 |
| O | 11.008299988 | 6.494389931 | 10.350900000 |
| O | 8.474900012  | 6.494389931 | 1.478700000  |
| O | 11.008299988 | 6.494389931 | 1.478700000  |
| O | 8.474900012  | 6.494389931 | 4.436100000  |

|   |              |             |              |
|---|--------------|-------------|--------------|
| O | 11.008299988 | 6.494389931 | 4.436100000  |
| O | 1.980500012  | 6.494389931 | 1.478700000  |
| O | 4.513899988  | 6.494389931 | 1.478700000  |
| O | 1.980500012  | 6.494389931 | 4.436100000  |
| O | 4.513899988  | 6.494389931 | 4.436100000  |
| O | 1.980500012  | 6.494389931 | 7.393500000  |
| O | 4.513899988  | 6.494389931 | 7.393500000  |
| O | 1.980500012  | 6.494389931 | 10.350900000 |
| O | 4.513899988  | 6.494389931 | 10.350900000 |
| O | 0.000000000  | 7.761090122 | 8.872200000  |
| O | 0.000000000  | 7.761090122 | 5.914800000  |
| O | 6.494400000  | 7.761090122 | 2.957400000  |
| O | 6.494400000  | 7.761090122 | 0.000000000  |
| O | 0.000000000  | 7.761090122 | 2.957400000  |
| O | 0.000000000  | 7.761090122 | 0.000000000  |
| O | 6.494400000  | 7.761090122 | 8.872200000  |
| O | 6.494400000  | 7.761090122 | 5.914800000  |
| O | 3.247200000  | 8.474889884 | 2.957400000  |
| O | 3.247200000  | 8.474889884 | 0.000000000  |
| O | 3.247200000  | 8.474889884 | 8.872200000  |
| O | 3.247200000  | 8.474889884 | 5.914800000  |
| O | 9.741600000  | 8.474889884 | 2.957400000  |

|   |              |              |              |
|---|--------------|--------------|--------------|
| O | 9.741600000  | 8.474889884  | 0.000000000  |
| O | 9.741600000  | 8.474889884  | 8.872200000  |
| O | 9.741600000  | 8.474889884  | 5.914800000  |
| O | 1.268396455  | 9.785361892  | 1.481742928  |
| O | 1.268295403  | 9.786075557  | 4.438709728  |
| O | 5.209924060  | 9.771880837  | 1.481125423  |
| O | 5.210104864  | 9.776357496  | 4.439111698  |
| O | 1.267969254  | 9.784985057  | 7.396107480  |
| O | 1.268753777  | 9.786668135  | 10.353440052 |
| O | 5.210284369  | 9.772908114  | 7.396618283  |
| O | 5.210406853  | 9.775913866  | 10.355076322 |
| O | 7.758663159  | 9.778983197  | 1.481149319  |
| O | 7.758068402  | 9.783270546  | 4.438899711  |
| O | 11.700383128 | 9.778882470  | 1.481390643  |
| O | 11.699707191 | 9.779491836  | 4.438804720  |
| O | 7.758197381  | 9.779968327  | 7.396328339  |
| O | 7.758413515  | 9.782605101  | 10.355149074 |
| O | 11.700066721 | 9.778652797  | 7.396482006  |
| O | 11.700047237 | 9.779660786  | 10.354389614 |
| O | 9.724335027  | 11.071492848 | 2.958500271  |
| O | 9.723302158  | 11.070848120 | 0.003617137  |
| O | 3.242549230  | 11.069678681 | 2.958108238  |

|   |              |              |             |
|---|--------------|--------------|-------------|
| O | 3.243351289  | 11.071922547 | 0.002889025 |
| O | 3.242191778  | 11.070664168 | 8.872879137 |
| O | 3.242560141  | 11.069428648 | 5.917410674 |
| O | 9.724454005  | 11.070890269 | 8.873823731 |
| O | 9.724196697  | 11.071821819 | 5.917837605 |
| O | 6.467074033  | 11.792061356 | 8.880855482 |
| O | -0.026230752 | 11.796888775 | 2.957196767 |
| O | 6.466625010  | 11.800629266 | 0.013893865 |
| O | 6.466839195  | 11.788434451 | 5.922617946 |
| O | -0.026568201 | 11.796434787 | 0.001915804 |
| O | -0.026321933 | 11.796725182 | 5.915549878 |
| O | 6.468011434  | 11.794629193 | 2.947626739 |
| O | -0.026511050 | 11.796320129 | 8.871766209 |
| O | 8.436437837  | 13.104250732 | 1.485416492 |
| O | 8.435044269  | 13.088231843 | 4.441491932 |
| O | 10.970782229 | 13.112040326 | 1.483730301 |
| O | 10.970892634 | 13.111488825 | 4.441953996 |
| O | 1.961082795  | 13.098024200 | 1.482808302 |
| O | 1.961572473  | 13.096050370 | 4.440733181 |
| O | 4.495328992  | 13.117257796 | 1.483560191 |
| O | 4.497391094  | 13.099481534 | 4.440846390 |
| O | 1.961666122  | 13.098107425 | 7.397468121 |

|   |              |              |              |
|---|--------------|--------------|--------------|
| O | 1.959944197  | 13.092793156 | 10.354476680 |
| O | 4.498192373  | 13.108562369 | 7.399015433  |
| O | 4.495288467  | 13.105002973 | 10.353981256 |
| O | 8.433858131  | 13.096031081 | 7.399521740  |
| O | 8.436407703  | 13.090987205 | 10.354717412 |
| O | 10.970576746 | 13.112599685 | 7.397993237  |
| O | 10.971018236 | 13.108093736 | 10.356319376 |
| O | -0.028591206 | 14.406296634 | 2.966866637  |
| O | -0.027471312 | 14.406141613 | 5.924198735  |
| O | -0.027692122 | 14.405596899 | 8.882672981  |
| O | -0.027331682 | 14.406569169 | 0.008049096  |
| O | 6.464706045  | 14.419291196 | 2.982541331  |
| O | 6.465464590  | 14.403293382 | 5.915455242  |
| O | 6.464603563  | 14.409744229 | 8.879846417  |
| O | 6.465474202  | 14.438236897 | -0.004909757 |
| O | 9.690494917  | 15.108529521 | 8.882136036  |
| O | 3.210576130  | 15.109559299 | 8.887159476  |
| O | 9.682613573  | 15.108470941 | 5.916353463  |
| O | 9.685595542  | 15.108612746 | 2.969504402  |
| O | 3.213378464  | 15.105327672 | 2.967872390  |
| O | 9.690860552  | 15.107953016 | -0.001903501 |
| O | 3.206977323  | 15.110736596 | -0.004418592 |

|   |              |              |              |
|---|--------------|--------------|--------------|
| O | 3.216804260  | 15.103304192 | 5.919294420  |
| O | 1.246528122  | 16.471900257 | 10.355297654 |
| O | 5.175121349  | 16.488729252 | 4.447235676  |
| O | 5.173852863  | 16.443677982 | 7.405542651  |
| O | 7.732473842  | 16.449080119 | 1.483138939  |
| O | 7.725334158  | 16.495969488 | 4.444431351  |
| O | 5.172993264  | 16.474270211 | 10.357098829 |
| O | 11.657944172 | 16.456486449 | 1.482995446  |
| O | 11.656547616 | 16.456811848 | 4.444566208  |
| O | 1.244078824  | 16.462535814 | 4.442790703  |
| O | 1.240174521  | 16.461795717 | 1.485441334  |
| O | 5.165715900  | 16.439083807 | 1.480426648  |
| O | 7.729224304  | 16.450117398 | 7.407890235  |
| O | 7.728219880  | 16.475519661 | 10.356238580 |
| O | 1.245043502  | 16.460479830 | 7.401868259  |
| O | 11.658934049 | 16.453539990 | 7.401914276  |
| O | 11.657154063 | 16.461719635 | 10.355919299 |
| O | 3.230053615  | 17.751907195 | 8.866905426  |
| O | 3.218494103  | 17.741516903 | 0.012740834  |
| O | 9.690998882  | 17.733916620 | 2.952329597  |
| O | 9.694339991  | 17.734568491 | 5.936239849  |
| O | 3.206467383  | 17.728475191 | 2.955045436  |

|   |              |              |              |
|---|--------------|--------------|--------------|
| O | 3.203437096  | 17.721925760 | 5.933450192  |
| O | 9.672809237  | 17.744484078 | 8.876294106  |
| O | 9.672966272  | 17.735154996 | 0.008291485  |
| O | 6.454237072  | 18.567554254 | 0.034990064  |
| O | 6.461338308  | 18.525558385 | 6.022825186  |
| O | -0.045573543 | 18.501472366 | 0.004759640  |
| O | 6.438072770  | 18.500212558 | 2.872752706  |
| O | -0.051121449 | 18.505089269 | 5.921360696  |
| O | 6.448208450  | 18.548683563 | 8.915433757  |
| O | -0.048883998 | 18.503873396 | 8.877473636  |
| O | -0.054465545 | 18.503778740 | 2.971273045  |
| O | 1.990490867  | 19.956333326 | 4.439737720  |
| O | 4.463920385  | 19.985459649 | 1.485112944  |
| O | 4.472095016  | 19.851988201 | 4.456128341  |
| O | 1.991729479  | 19.943414130 | 7.411915730  |
| O | 2.002558111  | 19.940391948 | 10.345339733 |
| O | 4.495307300  | 20.012137079 | 7.355938299  |
| O | 4.484796114  | 19.958280724 | 10.358796968 |
| O | 8.435437829  | 20.009001668 | 1.483055304  |
| O | 8.400292864  | 19.832606729 | 4.457537365  |
| O | 10.906223996 | 19.928505031 | 1.482592530  |
| O | 10.882047294 | 19.971564254 | 4.445875272  |

|   |              |              |              |
|---|--------------|--------------|--------------|
| O | 8.408874045  | 20.011108730 | 7.393793019  |
| O | 8.425449702  | 20.024461554 | 10.362242102 |
| O | 10.897674249 | 19.946033403 | 7.411309936  |
| O | 10.904269442 | 19.933347095 | 10.357327968 |
| O | 1.983706427  | 19.927701354 | 1.480429251  |
| O | 6.476327903  | 21.140668063 | 3.104254074  |
| O | 6.455368266  | 21.385361967 | 5.491347047  |
| O | -0.050200153 | 21.107050079 | 2.962174427  |
| O | -0.048821782 | 21.107488351 | 5.923956702  |
| O | -0.048419649 | 21.108020564 | 8.881066758  |
| O | -0.045755256 | 21.105342712 | 0.004095526  |
| O | 6.439812230  | 21.219407684 | 8.852496973  |
| O | 6.443635743  | 21.260439856 | 0.030510431  |
| H | 0.000000000  | 0.932899949  | 9.814800036  |
| H | 0.816399984  | 0.932899949  | 8.400899982  |
| H | 6.457700016  | 0.932899949  | 6.856699960  |
| H | 0.834099951  | 0.932899949  | -0.439200043 |
| H | 0.000000000  | 0.932899949  | 3.900000036  |
| H | 0.816399984  | 0.932899949  | 2.486099982  |
| H | 6.457700016  | 0.932899949  | 0.941899960  |
| H | 0.834099951  | 0.932899949  | 5.475599957  |
| H | 6.494400000  | 0.932899949  | 9.814800036  |



|   |              |              |              |
|---|--------------|--------------|--------------|
| H | 7.310799984  | 0.932899949  | 8.400899982  |
| H | -0.036699984 | 0.932899949  | 6.856699960  |
| H | 7.328499951  | 0.932899949  | -0.439200043 |
| H | 6.494400000  | 0.932899949  | 3.900000036  |
| H | 7.310799984  | 0.932899949  | 2.486099982  |
| H | -0.036699984 | 0.932899949  | 0.941899960  |
| H | 7.328499951  | 0.932899949  | 5.475599957  |
| H | 7.222405874  | 21.844211122 | -0.004889647 |
| H | 7.250297114  | 21.759616447 | 8.840137999  |
| H | 6.518700746  | 21.563782171 | 4.228542452  |
| H | 5.551337525  | 21.683581110 | 5.710075168  |

TS4-2:

|    |             |             |              |
|----|-------------|-------------|--------------|
| Ti | 3.247200000 | 3.247190143 | 1.478700000  |
| Ti | 3.247200000 | 3.247190143 | 4.436100000  |
| Ti | 0.000000000 | 3.247190143 | 2.957400000  |
| Ti | 0.000000000 | 3.247190143 | 0.000000000  |
| Ti | 3.247200000 | 3.247190143 | 7.393500000  |
| Ti | 3.247200000 | 3.247190143 | 10.350900000 |
| Ti | 0.000000000 | 3.247190143 | 8.872200000  |
| Ti | 0.000000000 | 3.247190143 | 5.914800000  |
| Ti | 9.741600000 | 3.247190143 | 1.478700000  |
| Ti | 9.741600000 | 3.247190143 | 4.436100000  |

|    |             |             |              |
|----|-------------|-------------|--------------|
| Ti | 6.494400000 | 3.247190143 | 2.957400000  |
| Ti | 6.494400000 | 3.247190143 | 0.000000000  |
| Ti | 9.741600000 | 3.247190143 | 7.393500000  |
| Ti | 9.741600000 | 3.247190143 | 10.350900000 |
| Ti | 6.494400000 | 3.247190143 | 8.872200000  |
| Ti | 6.494400000 | 3.247190143 | 5.914800000  |
| Ti | 0.000000000 | 6.494389931 | 4.436100000  |
| Ti | 0.000000000 | 6.494389931 | 1.478700000  |
| Ti | 3.247200000 | 6.494389931 | 2.957400000  |
| Ti | 3.247200000 | 6.494389931 | 0.000000000  |
| Ti | 0.000000000 | 6.494389931 | 10.350900000 |
| Ti | 0.000000000 | 6.494389931 | 7.393500000  |
| Ti | 3.247200000 | 6.494389931 | 8.872200000  |
| Ti | 3.247200000 | 6.494389931 | 5.914800000  |
| Ti | 6.494400000 | 6.494389931 | 4.436100000  |
| Ti | 6.494400000 | 6.494389931 | 1.478700000  |
| Ti | 9.741600000 | 6.494389931 | 2.957400000  |
| Ti | 9.741600000 | 6.494389931 | 0.000000000  |
| Ti | 6.494400000 | 6.494389931 | 10.350900000 |
| Ti | 6.494400000 | 6.494389931 | 7.393500000  |
| Ti | 9.741600000 | 6.494389931 | 8.872200000  |
| Ti | 9.741600000 | 6.494389931 | 5.914800000  |

|    |              |              |              |
|----|--------------|--------------|--------------|
| Ti | 3.226575084  | 9.737519184  | 1.478189434  |
| Ti | 3.225464023  | 9.735180305  | 4.436458792  |
| Ti | -0.015210664 | 9.837202982  | 2.961319146  |
| Ti | -0.008740164 | 9.837845924  | 0.001238086  |
| Ti | 3.226385578  | 9.737618125  | 7.393992821  |
| Ti | 3.229552637  | 9.737823509  | 10.351191836 |
| Ti | -0.012616021 | 9.836991526  | 8.872383950  |
| Ti | -0.018344732 | 9.836087478  | 5.916658194  |
| Ti | 9.740701954  | 9.739431577  | 1.482328020  |
| Ti | 9.729806689  | 9.738047110  | 4.437654173  |
| Ti | 6.477453643  | 9.757999372  | 2.957591758  |
| Ti | 6.487143157  | 9.752632596  | 0.005401987  |
| Ti | 9.732189744  | 9.737108773  | 7.394843251  |
| Ti | 9.741261122  | 9.735482488  | 10.354903137 |
| Ti | 6.480539652  | 9.754553920  | 8.880190303  |
| Ti | 6.478115162  | 9.739473726  | 5.919250177  |
| Ti | -0.033696844 | 13.176443422 | 1.505437499  |
| Ti | -0.034688149 | 13.176430920 | 4.462846489  |
| Ti | 3.212362350  | 12.989308502 | 2.958274562  |
| Ti | 3.210709265  | 12.990223979 | 5.915088524  |
| Ti | 6.460622236  | 13.109512494 | 1.453648338  |
| Ti | 6.459977602  | 13.034027943 | 4.417242316  |

|    |              |              |              |
|----|--------------|--------------|--------------|
| Ti | 9.709146704  | 12.996568383 | 2.960071360  |
| Ti | 9.707596231  | 12.995332507 | 5.916417698  |
| Ti | -0.034937924 | 13.175971574 | 7.420068808  |
| Ti | -0.035384479 | 13.176670952 | 10.377129299 |
| Ti | 3.211348574  | 12.991223396 | 8.873057291  |
| Ti | 3.210267256  | 12.993156864 | -0.000034188 |
| Ti | 6.457809252  | 13.026527316 | 7.402298856  |
| Ti | 6.461547168  | 13.087658554 | 10.381312127 |
| Ti | 9.707861332  | 12.988351233 | 8.873816633  |
| Ti | 9.710716011  | 12.994802080 | 0.003576325  |
| Ti | 9.701217561  | 16.324653788 | 1.485982302  |
| Ti | 9.694283620  | 16.323957625 | 4.439935156  |
| Ti | 6.440969922  | 16.334014302 | 2.947632299  |
| Ti | -0.052891043 | 16.637700591 | 5.919709521  |
| Ti | 3.175114888  | 16.302111543 | 1.480770653  |
| Ti | 3.182445766  | 16.307742996 | 4.443462152  |
| Ti | -0.053782464 | 16.638621426 | 2.963989560  |
| Ti | 6.445769803  | 16.301228213 | 5.914964786  |
| Ti | 3.185460986  | 16.308887432 | 7.401552054  |
| Ti | 3.180547323  | 16.316031942 | 10.352173102 |
| Ti | -0.051354338 | 16.643009145 | 8.874696637  |
| Ti | 6.442555854  | 16.462100400 | 0.000656425  |

|    |              |              |              |
|----|--------------|--------------|--------------|
| Ti | 9.699165331  | 16.301830792 | 7.399905492  |
| Ti | 9.703130422  | 16.304166098 | 10.357020517 |
| Ti | 6.444329865  | 16.303461006 | 8.873376809  |
| Ti | -0.053924952 | 16.638089928 | 0.003182399  |
| Ti | 6.430252993  | 19.716055002 | 7.426385105  |
| Ti | 6.419394226  | 19.734809250 | 10.394307534 |
| Ti | 3.211351951  | 19.570949170 | 8.878236290  |
| Ti | 3.191626510  | 19.552396021 | -0.001763438 |
| Ti | 6.426025528  | 19.975583710 | 1.565813884  |
| Ti | 6.296700333  | 19.633154478 | 4.326369577  |
| Ti | 3.146909838  | 19.553846926 | 2.937769134  |
| Ti | 3.148505123  | 19.550477555 | 5.933198932  |
| Ti | -0.071708697 | 20.003291990 | 1.488283514  |
| Ti | -0.071936780 | 20.004871840 | 4.444933281  |
| Ti | 9.662236743  | 19.605885899 | 2.962143670  |
| Ti | 9.743839919  | 19.551019054 | 5.974977648  |
| Ti | -0.044354414 | 20.014415235 | 7.411325551  |
| Ti | -0.057268139 | 20.006972473 | 10.363269740 |
| Ti | 9.672118622  | 19.549799609 | 8.905166966  |
| Ti | 9.677887988  | 19.560169898 | 0.013549506  |
| O  | 0.000000000  | 1.266689833  | 2.957400000  |
| O  | 0.000000000  | 1.266689833  | 0.000000000  |

|   |             |             |              |
|---|-------------|-------------|--------------|
| O | 0.000000000 | 1.266689833 | 8.872200000  |
| O | 0.000000000 | 1.266689833 | 5.914800000  |
| O | 6.494400000 | 1.266689833 | 2.957400000  |
| O | 6.494400000 | 1.266689833 | 0.000000000  |
| O | 6.494400000 | 1.266689833 | 8.872200000  |
| O | 6.494400000 | 1.266689833 | 5.914800000  |
| O | 9.741600000 | 1.980499953 | 8.872200000  |
| O | 9.741600000 | 1.980499953 | 5.914800000  |
| O | 9.741600000 | 1.980499953 | 2.957400000  |
| O | 9.741600000 | 1.980499953 | 0.000000000  |
| O | 3.247200000 | 1.980499953 | 8.872200000  |
| O | 3.247200000 | 1.980499953 | 5.914800000  |
| O | 3.247200000 | 1.980499953 | 2.957400000  |
| O | 3.247200000 | 1.980499953 | 0.000000000  |
| O | 1.266699988 | 3.247190143 | 1.478700000  |
| O | 1.266699988 | 3.247190143 | 4.436100000  |
| O | 5.227599998 | 3.247190143 | 1.478700000  |
| O | 5.227599998 | 3.247190143 | 4.436100000  |
| O | 1.266699988 | 3.247190143 | 7.393500000  |
| O | 1.266699988 | 3.247190143 | 10.350900000 |
| O | 5.227599998 | 3.247190143 | 7.393500000  |
| O | 5.227599998 | 3.247190143 | 10.350900000 |

|   |              |             |              |
|---|--------------|-------------|--------------|
| O | 7.761099988  | 3.247190143 | 1.478700000  |
| O | 7.761099988  | 3.247190143 | 4.436100000  |
| O | 11.721999998 | 3.247190143 | 1.478700000  |
| O | 11.721999998 | 3.247190143 | 4.436100000  |
| O | 7.761099988  | 3.247190143 | 7.393500000  |
| O | 7.761099988  | 3.247190143 | 10.350900000 |
| O | 11.721999998 | 3.247190143 | 7.393500000  |
| O | 11.721999998 | 3.247190143 | 10.350900000 |
| O | 9.741600000  | 4.513899978 | 8.872200000  |
| O | 9.741600000  | 4.513899978 | 5.914800000  |
| O | 9.741600000  | 4.513899978 | 2.957400000  |
| O | 9.741600000  | 4.513899978 | 0.000000000  |
| O | 3.247200000  | 4.513899978 | 8.872200000  |
| O | 3.247200000  | 4.513899978 | 5.914800000  |
| O | 3.247200000  | 4.513899978 | 2.957400000  |
| O | 3.247200000  | 4.513899978 | 0.000000000  |
| O | 0.000000000  | 5.227600085 | 2.957400000  |
| O | 0.000000000  | 5.227600085 | 0.000000000  |
| O | 0.000000000  | 5.227600085 | 8.872200000  |
| O | 0.000000000  | 5.227600085 | 5.914800000  |
| O | 6.494400000  | 5.227600085 | 0.000000000  |
| O | 6.494400000  | 5.227600085 | 2.957400000  |

|   |              |             |              |
|---|--------------|-------------|--------------|
| O | 6.494400000  | 5.227600085 | 8.872200000  |
| O | 6.494400000  | 5.227600085 | 5.914800000  |
| O | 8.474900012  | 6.494389931 | 7.393500000  |
| O | 11.008299988 | 6.494389931 | 7.393500000  |
| O | 8.474900012  | 6.494389931 | 10.350900000 |
| O | 11.008299988 | 6.494389931 | 10.350900000 |
| O | 8.474900012  | 6.494389931 | 1.478700000  |
| O | 11.008299988 | 6.494389931 | 1.478700000  |
| O | 8.474900012  | 6.494389931 | 4.436100000  |
| O | 11.008299988 | 6.494389931 | 4.436100000  |
| O | 1.980500012  | 6.494389931 | 1.478700000  |
| O | 4.513899988  | 6.494389931 | 1.478700000  |
| O | 1.980500012  | 6.494389931 | 4.436100000  |
| O | 4.513899988  | 6.494389931 | 4.436100000  |
| O | 1.980500012  | 6.494389931 | 7.393500000  |
| O | 4.513899988  | 6.494389931 | 7.393500000  |
| O | 1.980500012  | 6.494389931 | 10.350900000 |
| O | 4.513899988  | 6.494389931 | 10.350900000 |
| O | 0.000000000  | 7.761090122 | 8.872200000  |
| O | 0.000000000  | 7.761090122 | 5.914800000  |
| O | 6.494400000  | 7.761090122 | 2.957400000  |
| O | 6.494400000  | 7.761090122 | 0.000000000  |



|   |             |             |              |
|---|-------------|-------------|--------------|
| O | 0.000000000 | 7.761090122 | 2.957400000  |
| O | 0.000000000 | 7.761090122 | 0.000000000  |
| O | 6.494400000 | 7.761090122 | 8.872200000  |
| O | 6.494400000 | 7.761090122 | 5.914800000  |
| O | 3.247200000 | 8.474889884 | 2.957400000  |
| O | 3.247200000 | 8.474889884 | 0.000000000  |
| O | 3.247200000 | 8.474889884 | 8.872200000  |
| O | 3.247200000 | 8.474889884 | 5.914800000  |
| O | 9.741600000 | 8.474889884 | 2.957400000  |
| O | 9.741600000 | 8.474889884 | 0.000000000  |
| O | 9.741600000 | 8.474889884 | 8.872200000  |
| O | 9.741600000 | 8.474889884 | 5.914800000  |
| O | 1.269033816 | 9.786886020 | 1.480007053  |
| O | 1.267781046 | 9.786848873 | 4.436842189  |
| O | 5.210737678 | 9.774566189 | 1.478702721  |
| O | 5.209673895 | 9.775397727 | 4.438023375  |
| O | 1.267966526 | 9.786949243 | 7.393213132  |
| O | 1.269871723 | 9.787770422 | 10.350835055 |
| O | 5.210114605 | 9.773837165 | 7.395463832  |
| O | 5.211601303 | 9.775504169 | 10.355079398 |
| O | 7.759454957 | 9.781272784 | 1.481253537  |
| O | 7.757260889 | 9.782881566 | 4.437906971  |

|   |              |              |              |
|---|--------------|--------------|--------------|
| O | 11.700779286 | 9.780005832  | 1.478319678  |
| O | 11.698591193 | 9.779487907  | 4.435949646  |
| O | 7.757799664  | 9.781793924  | 7.394670184  |
| O | 7.759677974  | 9.782710472  | 10.353048019 |
| O | 11.699345453 | 9.779069995  | 7.394639664  |
| O | 11.701218048 | 9.779499694  | 10.352282644 |
| O | 9.722686229  | 11.073799579 | 2.958270659  |
| O | 9.722109656  | 11.072926250 | 0.001869077  |
| O | 3.241760161  | 11.069592241 | 2.957950195  |
| O | 3.243041636  | 11.070607017 | 0.001608352  |
| O | 3.242174893  | 11.069400787 | 8.872226262  |
| O | 3.241764187  | 11.069340780 | 5.915466953  |
| O | 9.723300599  | 11.070113381 | 8.873279333  |
| O | 9.721960025  | 11.072234731 | 5.915571881  |
| O | 6.464732801  | 11.795481804 | 8.877892285  |
| O | -0.030024910 | 11.798443265 | 2.955923666  |
| O | 6.467678272  | 11.803577153 | 0.005926630  |
| O | 6.464251566  | 11.791984560 | 5.916111548  |
| O | -0.029111538 | 11.798205376 | -0.000756503 |
| O | -0.031499529 | 11.797981775 | 5.912407227  |
| O | 6.464725528  | 11.798428977 | 2.949977163  |
| O | -0.031354054 | 11.797669949 | 8.870686994  |

|   |              |              |              |
|---|--------------|--------------|--------------|
| O | 8.433139981  | 13.104237516 | 1.484423042  |
| O | 8.430871876  | 13.096120022 | 4.437757682  |
| O | 10.966655557 | 13.113167259 | 1.482007911  |
| O | 10.965652562 | 13.115585077 | 4.438518089  |
| O | 1.956567758  | 13.095812838 | 1.480483667  |
| O | 1.956386305  | 13.095637815 | 4.438230984  |
| O | 4.490676663  | 13.114078093 | 1.481795925  |
| O | 4.491759150  | 13.103663155 | 4.438215606  |
| O | 1.956093147  | 13.094239418 | 7.394349129  |
| O | 1.955685429  | 13.092320594 | 10.352685323 |
| O | 4.491982168  | 13.106865361 | 7.395693681  |
| O | 4.490596392  | 13.106866789 | 10.350485373 |
| O | 8.430148660  | 13.096344337 | 7.395526410  |
| O | 8.433449114  | 13.097914543 | 10.352229174 |
| O | 10.965493969 | 13.113542666 | 7.394568449  |
| O | 10.965913507 | 13.113034027 | 10.354455268 |
| O | -0.033636576 | 14.409596352 | 2.963779585  |
| O | -0.033626964 | 14.409479194 | 5.921227850  |
| O | -0.032239371 | 14.407774328 | 8.879323312  |
| O | -0.034059491 | 14.409951042 | 0.007147089  |
| O | 6.456013030  | 14.417853150 | 2.969820843  |
| O | 6.456730142  | 14.411548752 | 5.915118808  |

|   |              |              |              |
|---|--------------|--------------|--------------|
| O | 6.458234635  | 14.411590186 | 8.869300683  |
| O | 6.459858235  | 14.434125286 | -0.005185978 |
| O | 9.686523721  | 15.103461355 | 8.878906082  |
| O | 3.199058831  | 15.106325660 | 8.878134910  |
| O | 9.683186119  | 15.111800664 | 5.913917275  |
| O | 9.686652440  | 15.123337536 | 2.963564168  |
| O | 3.202147438  | 15.107151125 | 2.964524968  |
| O | 9.687762983  | 15.113999881 | 0.014206995  |
| O | 3.198344967  | 15.106388168 | -0.003441586 |
| O | 3.206249171  | 15.105988830 | 5.918288786  |
| O | 1.234398401  | 16.476128312 | 10.354774667 |
| O | 5.162902525  | 16.479707711 | 4.439042968  |
| O | 5.165171409  | 16.456432513 | 7.394208830  |
| O | 7.723463122  | 16.452587723 | 1.476410381  |
| O | 7.720007711  | 16.463670249 | 4.437791751  |
| O | 5.162221523  | 16.460390532 | 10.347225490 |
| O | 11.645950054 | 16.479526258 | 1.488203901  |
| O | 11.647533519 | 16.472980756 | 4.439442572  |
| O | 1.234299167  | 16.468607682 | 4.442345556  |
| O | 1.232265640  | 16.467238217 | 1.481501368  |
| O | 5.158457239  | 16.447632072 | 1.476133805  |
| O | 7.723886167  | 16.457568733 | 7.397370054  |

|   |              |              |              |
|---|--------------|--------------|--------------|
| O | 7.724228162  | 16.462178267 | 10.348250879 |
| O | 1.234699612  | 16.468180483 | 7.399338381  |
| O | 11.649753695 | 16.463993148 | 7.398846743  |
| O | 11.650935026 | 16.461651769 | 10.355875530 |
| O | 3.211969439  | 17.745600653 | 8.868211769  |
| O | 3.203585948  | 17.731761694 | 0.004183656  |
| O | 9.637442163  | 17.781137818 | 2.975596291  |
| O | 9.675839394  | 17.737781770 | 5.926158545  |
| O | 3.195874107  | 17.735339306 | 2.956092947  |
| O | 3.192311280  | 17.733130802 | 5.925346443  |
| O | 9.675137999  | 17.728473048 | 8.884138314  |
| O | 9.665777360  | 17.739943482 | 0.004801871  |
| O | 6.446026462  | 18.535348598 | -0.012881488 |
| O | 6.472137586  | 18.559471407 | 5.930330490  |
| O | -0.064144669 | 18.513451796 | 0.006678992  |
| O | 6.463490683  | 18.482453798 | 2.893913731  |
| O | -0.057623382 | 18.515029860 | 5.928091975  |
| O | 6.438028868  | 18.530769783 | 8.873104846  |
| O | -0.057685339 | 18.517107990 | 8.879107658  |
| O | -0.051096640 | 18.513067102 | 2.968689342  |
| O | 1.965821759  | 19.955159601 | 4.438650817  |
| O | 4.435902244  | 19.945231869 | 1.473042612  |

|   |              |              |              |
|---|--------------|--------------|--------------|
| O | 4.422064756  | 19.932826312 | 4.456638906  |
| O | 1.979349074  | 19.967165462 | 7.414421831  |
| O | 1.982901251  | 19.946998887 | 10.343920299 |
| O | 4.475580301  | 19.973506652 | 7.362668040  |
| O | 4.468266437  | 19.941845710 | 10.351417190 |
| O | 8.424705444  | 20.032618696 | 1.468924019  |
| O | 8.415740054  | 20.156314932 | 4.556695083  |
| O | 10.887477261 | 19.937824825 | 1.516667574  |
| O | 10.884419178 | 19.939840447 | 4.445141245  |
| O | 8.433311303  | 19.950594358 | 7.419899527  |
| O | 8.415801232  | 20.005689090 | 10.363387917 |
| O | 10.909275066 | 19.958583621 | 7.437831663  |
| O | 10.897170543 | 19.950395761 | 10.371191549 |
| O | 1.955881040  | 19.933667137 | 1.470101892  |
| O | 6.410962547  | 21.045595942 | 3.028720304  |
| O | 6.727010704  | 21.226073916 | 5.811061506  |
| O | -0.067218469 | 21.117484663 | 2.966518374  |
| O | -0.069224459 | 21.118263694 | 5.925382524  |
| O | -0.054672457 | 21.125494286 | 8.887785971  |
| O | -0.068129503 | 21.119487783 | 0.013101992  |
| O | 6.437711681  | 21.177786507 | 8.841100810  |
| O | 6.412449115  | 21.226795082 | -0.017274292 |

|   |              |              |              |
|---|--------------|--------------|--------------|
| H | 0.000000000  | 0.932899949  | 9.814800036  |
| H | 0.816399984  | 0.932899949  | 8.400899982  |
| H | 6.457700016  | 0.932899949  | 6.856699960  |
| H | 0.834099951  | 0.932899949  | -0.439200043 |
| H | 0.000000000  | 0.932899949  | 3.900000036  |
| H | 0.816399984  | 0.932899949  | 2.486099982  |
| H | 6.457700016  | 0.932899949  | 0.941899960  |
| H | 0.834099951  | 0.932899949  | 5.475599957  |
| H | 6.494400000  | 0.932899949  | 9.814800036  |
| H | 7.310799984  | 0.932899949  | 8.400899982  |
| H | -0.036699984 | 0.932899949  | 6.856699960  |
| H | 7.328499951  | 0.932899949  | -0.439200043 |
| H | 6.494400000  | 0.932899949  | 3.900000036  |
| H | 7.310799984  | 0.932899949  | 2.486099982  |
| H | -0.036699984 | 0.932899949  | 0.941899960  |
| H | 7.328499951  | 0.932899949  | 5.475599957  |
| H | 7.169190241  | 21.837810639 | -0.051309470 |
| H | 7.256065050  | 21.704289899 | 8.815862831  |
| H | 7.750596855  | 20.971497287 | 5.159451057  |
| H | 6.246200398  | 22.045233579 | 5.598405518  |

4-c:

|    |             |             |             |
|----|-------------|-------------|-------------|
| Ti | 3.247200000 | 3.247194072 | 1.478700000 |
|----|-------------|-------------|-------------|

|    |             |             |              |
|----|-------------|-------------|--------------|
| Ti | 3.247200000 | 3.247194072 | 4.436100000  |
| Ti | 0.000000000 | 3.247194072 | 2.957400000  |
| Ti | 0.000000000 | 3.247194072 | 0.000000000  |
| Ti | 3.247200000 | 3.247194072 | 7.393500000  |
| Ti | 3.247200000 | 3.247194072 | 10.350900000 |
| Ti | 0.000000000 | 3.247194072 | 8.872200000  |
| Ti | 0.000000000 | 3.247194072 | 5.914800000  |
| Ti | 9.741600000 | 3.247194072 | 1.478700000  |
| Ti | 9.741600000 | 3.247194072 | 4.436100000  |
| Ti | 6.494400000 | 3.247194072 | 2.957400000  |
| Ti | 6.494400000 | 3.247194072 | 0.000000000  |
| Ti | 9.741600000 | 3.247194072 | 7.393500000  |
| Ti | 9.741600000 | 3.247194072 | 10.350900000 |
| Ti | 6.494400000 | 3.247194072 | 8.872200000  |
| Ti | 6.494400000 | 3.247194072 | 5.914800000  |
| Ti | 0.000000000 | 6.494391717 | 4.436100000  |
| Ti | 0.000000000 | 6.494391717 | 1.478700000  |
| Ti | 3.247200000 | 6.494391717 | 2.957400000  |
| Ti | 3.247200000 | 6.494391717 | 0.000000000  |
| Ti | 0.000000000 | 6.494391717 | 10.350900000 |
| Ti | 0.000000000 | 6.494391717 | 7.393500000  |
| Ti | 3.247200000 | 6.494391717 | 8.872200000  |



|    |              |             |              |
|----|--------------|-------------|--------------|
| Ti | 3.247200000  | 6.494391717 | 5.914800000  |
| Ti | 6.494400000  | 6.494391717 | 4.436100000  |
| Ti | 6.494400000  | 6.494391717 | 1.478700000  |
| Ti | 9.741600000  | 6.494391717 | 2.957400000  |
| Ti | 9.741600000  | 6.494391717 | 0.000000000  |
| Ti | 6.494400000  | 6.494391717 | 10.350900000 |
| Ti | 6.494400000  | 6.494391717 | 7.393500000  |
| Ti | 9.741600000  | 6.494391717 | 8.872200000  |
| Ti | 9.741600000  | 6.494391717 | 5.914800000  |
| Ti | 3.226569889  | 9.738249994 | 1.477935216  |
| Ti | 3.225033704  | 9.734670595 | 4.436356229  |
| Ti | -0.016595140 | 9.836950806 | 2.961919735  |
| Ti | -0.005389183 | 9.838656387 | 0.000360330  |
| Ti | 3.226402853  | 9.737698493 | 7.394653149  |
| Ti | 3.232439917  | 9.738477881 | 10.351324564 |
| Ti | -0.011769282 | 9.837096897 | 8.872482964  |
| Ti | -0.017938182 | 9.836172490 | 5.916878342  |
| Ti | 9.742326204  | 9.737634556 | 1.484145756  |
| Ti | 9.729145040  | 9.741049290 | 4.438719783  |
| Ti | 6.476821348  | 9.756452026 | 2.960738905  |
| Ti | 6.489566868  | 9.752731537 | 0.010254607  |
| Ti | 9.731574854  | 9.737945668 | 7.393609660  |

|    |              |              |              |
|----|--------------|--------------|--------------|
| Ti | 9.742847185  | 9.734433779  | 10.354576403 |
| Ti | 6.482414455  | 9.751343855  | 8.883946320  |
| Ti | 6.476887980  | 9.738949371  | 5.922674018  |
| Ti | -0.029404955 | 13.174375650 | 1.506969313  |
| Ti | -0.028211544 | 13.179929236 | 4.464426805  |
| Ti | 3.215357307  | 12.989154553 | 2.959618641  |
| Ti | 3.214318333  | 12.990946217 | 5.916770456  |
| Ti | 6.463456912  | 13.114845337 | 1.463765840  |
| Ti | 6.463488864  | 13.033545023 | 4.418646845  |
| Ti | 9.714315727  | 12.997269904 | 2.964626348  |
| Ti | 9.712234142  | 12.997727821 | 5.920172531  |
| Ti | -0.030946725 | 13.173625552 | 7.419996766  |
| Ti | -0.034978968 | 13.180166768 | 10.378270855 |
| Ti | 3.213633044  | 12.993297597 | 8.874702670  |
| Ti | 3.211153482  | 12.995194632 | 0.000980792  |
| Ti | 6.460550798  | 13.016388485 | 7.410221376  |
| Ti | 6.463062702  | 13.082470373 | 10.394380286 |
| Ti | 9.709214376  | 12.988456962 | 8.876934324  |
| Ti | 9.713752013  | 12.989938585 | 0.007155134  |
| Ti | 9.711905785  | 16.315699755 | 1.483279593  |
| Ti | 9.701799459  | 16.321941289 | 4.440542725  |
| Ti | 6.450007139  | 16.341581009 | 2.950998057  |

|    |              |              |              |
|----|--------------|--------------|--------------|
| Ti | -0.046934899 | 16.639691924 | 5.917180116  |
| Ti | 3.180600448  | 16.312805447 | 1.481423056  |
| Ti | 3.195735257  | 16.308636685 | 4.440761217  |
| Ti | -0.046714349 | 16.639435105 | 2.963069336  |
| Ti | 6.448973101  | 16.290900071 | 5.916943642  |
| Ti | 3.192565990  | 16.309482868 | 7.401919126  |
| Ti | 3.188036406  | 16.318361176 | 10.354617807 |
| Ti | -0.048001020 | 16.640965663 | 8.871909228  |
| Ti | 6.446789943  | 16.461354945 | 0.004764490  |
| Ti | 9.703619969  | 16.313889518 | 7.395163715  |
| Ti | 9.706356580  | 16.307685846 | 10.353184414 |
| Ti | 6.448894648  | 16.288213647 | 8.878657542  |
| Ti | -0.048937902 | 16.638764302 | -0.000081388 |
| Ti | 6.438451783  | 19.648706877 | 7.489733323  |
| Ti | 6.411031907  | 19.752574439 | 10.425685667 |
| Ti | 3.207127604  | 19.574291395 | 8.870998113  |
| Ti | 3.180447699  | 19.559935939 | 0.008841680  |
| Ti | 6.427314926  | 19.981416261 | 1.563624580  |
| Ti | 6.439461143  | 19.680191366 | 4.312100477  |
| Ti | 3.203321755  | 19.565603112 | 2.962658967  |
| Ti | 3.186301102  | 19.545171144 | 5.917143207  |
| Ti | -0.066189496 | 20.002552964 | 1.482886141  |

|    |              |              |              |
|----|--------------|--------------|--------------|
| Ti | -0.058188265 | 20.003015525 | 4.438539382  |
| Ti | 9.667184697  | 19.578608390 | 2.962621349  |
| Ti | 9.690279693  | 19.561585441 | 5.920811211  |
| Ti | -0.050537472 | 20.008413376 | 7.398525806  |
| Ti | -0.049559416 | 20.004925418 | 10.351546606 |
| Ti | 9.686397340  | 19.566805769 | 8.879181475  |
| Ti | 9.684561893  | 19.558233216 | 0.003375576  |
| O  | 0.000000000  | 1.266694833  | 2.957400000  |
| O  | 0.000000000  | 1.266694833  | 0.000000000  |
| O  | 0.000000000  | 1.266694833  | 8.872200000  |
| O  | 0.000000000  | 1.266694833  | 5.914800000  |
| O  | 6.494400000  | 1.266694833  | 2.957400000  |
| O  | 6.494400000  | 1.266694833  | 0.000000000  |
| O  | 6.494400000  | 1.266694833  | 8.872200000  |
| O  | 6.494400000  | 1.266694833  | 5.914800000  |
| O  | 9.741600000  | 1.980495667  | 8.872200000  |
| O  | 9.741600000  | 1.980495667  | 5.914800000  |
| O  | 9.741600000  | 1.980495667  | 2.957400000  |
| O  | 9.741600000  | 1.980495667  | 0.000000000  |
| O  | 3.247200000  | 1.980495667  | 8.872200000  |
| O  | 3.247200000  | 1.980495667  | 5.914800000  |
| O  | 3.247200000  | 1.980495667  | 2.957400000  |

|   |              |             |              |
|---|--------------|-------------|--------------|
| O | 3.247200000  | 1.980495667 | 0.000000000  |
| O | 1.266698949  | 3.247194072 | 1.478700000  |
| O | 1.266698949  | 3.247194072 | 4.436100000  |
| O | 5.227599738  | 3.247194072 | 1.478700000  |
| O | 5.227599738  | 3.247194072 | 4.436100000  |
| O | 1.266698949  | 3.247194072 | 7.393500000  |
| O | 1.266698949  | 3.247194072 | 10.350900000 |
| O | 5.227599738  | 3.247194072 | 7.393500000  |
| O | 5.227599738  | 3.247194072 | 10.350900000 |
| O | 7.761098949  | 3.247194072 | 1.478700000  |
| O | 7.761098949  | 3.247194072 | 4.436100000  |
| O | 11.721999738 | 3.247194072 | 1.478700000  |
| O | 11.721999738 | 3.247194072 | 4.436100000  |
| O | 7.761098949  | 3.247194072 | 7.393500000  |
| O | 7.761098949  | 3.247194072 | 10.350900000 |
| O | 11.721999738 | 3.247194072 | 7.393500000  |
| O | 11.721999738 | 3.247194072 | 10.350900000 |
| O | 9.741600000  | 4.513896049 | 8.872200000  |
| O | 9.741600000  | 4.513896049 | 5.914800000  |
| O | 9.741600000  | 4.513896049 | 2.957400000  |
| O | 9.741600000  | 4.513896049 | 0.000000000  |
| O | 3.247200000  | 4.513896049 | 8.872200000  |

|   |              |             |              |
|---|--------------|-------------|--------------|
| O | 3.247200000  | 4.513896049 | 5.914800000  |
| O | 3.247200000  | 4.513896049 | 2.957400000  |
| O | 3.247200000  | 4.513896049 | 0.000000000  |
| O | 0.000000000  | 5.227596870 | 2.957400000  |
| O | 0.000000000  | 5.227596870 | 0.000000000  |
| O | 0.000000000  | 5.227596870 | 8.872200000  |
| O | 0.000000000  | 5.227596870 | 5.914800000  |
| O | 6.494400000  | 5.227596870 | 0.000000000  |
| O | 6.494400000  | 5.227596870 | 2.957400000  |
| O | 6.494400000  | 5.227596870 | 8.872200000  |
| O | 6.494400000  | 5.227596870 | 5.914800000  |
| O | 8.474899752  | 6.494391717 | 7.393500000  |
| O | 11.008298949 | 6.494391717 | 7.393500000  |
| O | 8.474899752  | 6.494391717 | 10.350900000 |
| O | 11.008298949 | 6.494391717 | 10.350900000 |
| O | 8.474899752  | 6.494391717 | 1.478700000  |
| O | 11.008298949 | 6.494391717 | 1.478700000  |
| O | 8.474899752  | 6.494391717 | 4.436100000  |
| O | 11.008298949 | 6.494391717 | 4.436100000  |
| O | 1.980499752  | 6.494391717 | 1.478700000  |
| O | 4.513898949  | 6.494391717 | 1.478700000  |
| O | 1.980499752  | 6.494391717 | 4.436100000  |

|   |             |             |              |
|---|-------------|-------------|--------------|
| O | 4.513898949 | 6.494391717 | 4.436100000  |
| O | 1.980499752 | 6.494391717 | 7.393500000  |
| O | 4.513898949 | 6.494391717 | 7.393500000  |
| O | 1.980499752 | 6.494391717 | 10.350900000 |
| O | 4.513898949 | 6.494391717 | 10.350900000 |
| O | 0.000000000 | 7.761086550 | 8.872200000  |
| O | 0.000000000 | 7.761086550 | 5.914800000  |
| O | 6.494400000 | 7.761086550 | 2.957400000  |
| O | 6.494400000 | 7.761086550 | 0.000000000  |
| O | 0.000000000 | 7.761086550 | 2.957400000  |
| O | 0.000000000 | 7.761086550 | 0.000000000  |
| O | 6.494400000 | 7.761086550 | 8.872200000  |
| O | 6.494400000 | 7.761086550 | 5.914800000  |
| O | 3.247200000 | 8.474887384 | 2.957400000  |
| O | 3.247200000 | 8.474887384 | 0.000000000  |
| O | 3.247200000 | 8.474887384 | 8.872200000  |
| O | 3.247200000 | 8.474887384 | 5.914800000  |
| O | 9.741600000 | 8.474887384 | 2.957400000  |
| O | 9.741600000 | 8.474887384 | 0.000000000  |
| O | 9.741600000 | 8.474887384 | 8.872200000  |
| O | 9.741600000 | 8.474887384 | 5.914800000  |
| O | 1.270178389 | 9.787359654 | 1.480859967  |

|   |              |              |              |
|---|--------------|--------------|--------------|
| O | 1.268118235  | 9.786641703  | 4.436951613  |
| O | 5.211585587  | 9.773758583  | 1.480416475  |
| O | 5.209976015  | 9.774965527  | 4.439286303  |
| O | 1.268632722  | 9.786492755  | 7.393309662  |
| O | 1.271089943  | 9.787261427  | 10.350587462 |
| O | 5.210574799  | 9.773629280  | 7.397437719  |
| O | 5.212759255  | 9.775008747  | 10.356897489 |
| O | 7.760382357  | 9.781027752  | 1.483136100  |
| O | 7.757263356  | 9.782517233  | 4.439434409  |
| O | 11.702166100 | 9.780068340  | 1.477868616  |
| O | 11.699376106 | 9.780184427  | 4.436842426  |
| O | 7.758142958  | 9.781061685  | 7.395872308  |
| O | 7.760680450  | 9.781972876  | 10.354994816 |
| O | 11.699945535 | 9.780070126  | 7.395244511  |
| O | 11.702525371 | 9.780849514  | 10.352344749 |
| O | 9.724940175  | 11.073233076 | 2.958688835  |
| O | 9.724218388  | 11.071343185 | 0.002127908  |
| O | 3.243218024  | 11.070430923 | 2.958735325  |
| O | 3.243446886  | 11.072155792 | 0.001728778  |
| O | 3.242777314  | 11.070831689 | 8.872622435  |
| O | 3.242563258  | 11.070408420 | 5.915774168  |
| O | 9.724108503  | 11.070440924 | 8.874209731  |



|   |              |              |              |
|---|--------------|--------------|--------------|
| O | 9.723442567  | 11.072797305 | 5.916826765  |
| O | 6.467499806  | 11.791395911 | 8.882431658  |
| O | -0.027118926 | 11.798953689 | 2.956208050  |
| O | 6.467455514  | 11.801455803 | 0.011894545  |
| O | 6.465244560  | 11.791336975 | 5.917203065  |
| O | -0.025547801 | 11.799101565 | -0.000136395 |
| O | -0.026964359 | 11.798989765 | 5.913622837  |
| O | 6.467504741  | 11.798687225 | 2.953055816  |
| O | -0.027068789 | 11.798385757 | 8.870423431  |
| O | 8.436718005  | 13.102527291 | 1.485014049  |
| O | 8.434473930  | 13.094698049 | 4.440193160  |
| O | 10.970175003 | 13.112895795 | 1.482804989  |
| O | 10.969706886 | 13.114879984 | 4.440765831  |
| O | 1.959700137  | 13.097969193 | 1.482028258  |
| O | 1.960524017  | 13.099125059 | 4.439208937  |
| O | 4.493461982  | 13.115315398 | 1.483204712  |
| O | 4.494950888  | 13.105189426 | 4.439648289  |
| O | 1.959743520  | 13.097834532 | 7.395249361  |
| O | 1.958249418  | 13.095465293 | 10.353065408 |
| O | 4.495489403  | 13.105162994 | 7.396607518  |
| O | 4.493625121  | 13.108433066 | 10.352266319 |
| O | 8.432679398  | 13.093753282 | 7.396897461  |

|   |              |              |              |
|---|--------------|--------------|--------------|
| O | 8.435924130  | 13.097296962 | 10.353572307 |
| O | 10.968803645 | 13.112985092 | 7.396311778  |
| O | 10.969006660 | 13.111318802 | 10.353777195 |
| O | -0.028877220 | 14.410326448 | 2.964201192  |
| O | -0.029327282 | 14.410683281 | 5.922274769  |
| O | -0.029533544 | 14.408920192 | 8.879090387  |
| O | -0.029465482 | 14.410566480 | 0.007168856  |
| O | 6.463603425  | 14.421991551 | 2.974895505  |
| O | 6.462151277  | 14.411545537 | 5.919249467  |
| O | 6.462609133  | 14.403347675 | 8.870369133  |
| O | 6.462931125  | 14.433907401 | -0.000594437 |
| O | 9.689532707  | 15.109993284 | 8.873425665  |
| O | 3.206771061  | 15.108788840 | 8.878416573  |
| O | 9.684758024  | 15.111630285 | 5.916539069  |
| O | 9.688118746  | 15.116146235 | 2.964006004  |
| O | 3.208882131  | 15.111370608 | 2.962524346  |
| O | 9.693791994  | 15.112402172 | 0.004904079  |
| O | 3.202245114  | 15.110719094 | 0.001921955  |
| O | 3.212711878  | 15.107909439 | 5.918667688  |
| O | 1.240063466  | 16.473994461 | 10.352317659 |
| O | 5.172588533  | 16.475802913 | 4.443590621  |
| O | 5.172268879  | 16.460531265 | 7.398404670  |

|   |              |              |              |
|---|--------------|--------------|--------------|
| O | 7.729676314  | 16.456581818 | 1.479386590  |
| O | 7.725278307  | 16.477680659 | 4.442562984  |
| O | 5.166499644  | 16.455305936 | 10.352163638 |
| O | 11.654711000 | 16.470297904 | 1.482948246  |
| O | 11.653817111 | 16.468878789 | 4.440510311  |
| O | 1.243578236  | 16.474329862 | 4.439749195  |
| O | 1.239639902  | 16.474424875 | 1.483226242  |
| O | 5.165860984  | 16.451434357 | 1.480731379  |
| O | 7.725446252  | 16.464045298 | 7.398623991  |
| O | 7.728172471  | 16.456108185 | 10.353431298 |
| O | 1.241991264  | 16.469953931 | 7.397143872  |
| O | 11.654786855 | 16.465561925 | 7.397478886  |
| O | 11.655133526 | 16.466783157 | 10.352357880 |
| O | 3.217569560  | 17.749055392 | 8.869534318  |
| O | 3.206854449  | 17.738422211 | 0.004185312  |
| O | 9.666636440  | 17.754610407 | 2.961506409  |
| O | 9.677602494  | 17.741216863 | 5.923492508  |
| O | 3.221849110  | 17.743801131 | 2.962502106  |
| O | 3.212071141  | 17.728242303 | 5.924078783  |
| O | 9.670482553  | 17.744896275 | 8.875088670  |
| O | 9.671795331  | 17.738017158 | -0.000114747 |
| O | 6.448535768  | 18.538685465 | 0.005189882  |

|   |              |              |              |
|---|--------------|--------------|--------------|
| O | 6.467079488  | 18.605262061 | 5.942110288  |
| O | -0.051038061 | 18.513285702 | 0.000275393  |
| O | 6.452581519  | 18.500600823 | 2.902040903  |
| O | -0.053637639 | 18.514861981 | 5.922876896  |
| O | 6.450410831  | 18.495676248 | 8.920707866  |
| O | -0.049977915 | 18.516881174 | 8.874436504  |
| O | -0.057192804 | 18.513184975 | 2.965764000  |
| O | 1.983124659  | 19.940920232 | 4.438567300  |
| O | 4.450505162  | 19.966873281 | 1.460187031  |
| O | 4.468694418  | 19.963288882 | 4.475660075  |
| O | 1.991783382  | 19.959959873 | 7.401434822  |
| O | 1.990531911  | 19.956737308 | 10.341496059 |
| O | 4.489679253  | 19.989901303 | 7.380384404  |
| O | 4.471081110  | 19.944931472 | 10.355658457 |
| O | 8.434264551  | 20.011856328 | 1.460701855  |
| O | 8.411619617  | 19.997017595 | 4.479789907  |
| O | 10.898575412 | 19.939335023 | 1.488082766  |
| O | 10.891319089 | 19.958392882 | 4.439186579  |
| O | 8.407326040  | 20.030300178 | 7.393092943  |
| O | 8.421772702  | 20.015550384 | 10.352868919 |
| O | 10.895478622 | 19.959758061 | 7.404723688  |
| O | 10.900569063 | 19.947632898 | 10.348722644 |

|   |              |              |              |
|---|--------------|--------------|--------------|
| O | 1.975995366  | 19.932268739 | 1.491776440  |
| O | 6.436329933  | 21.078569913 | 3.019331741  |
| O | 6.436571784  | 21.415205170 | 5.913890777  |
| O | -0.054700902 | 21.117734339 | 2.960857555  |
| O | -0.053001838 | 21.118318701 | 5.918058463  |
| O | -0.052932218 | 21.121509120 | 8.876513664  |
| O | -0.052845193 | 21.115354384 | 0.003614179  |
| O | 6.442699900  | 21.169892614 | 8.863070861  |
| O | 6.434614372  | 21.247715685 | -0.010262651 |
| H | 0.000000000  | 0.932897449  | 9.814799089  |
| H | 0.816399334  | 0.932897449  | 8.400899272  |
| H | 6.457698847  | 0.932897449  | 6.856699960  |
| H | 0.834099172  | 0.932897449  | -0.439201108 |
| H | 0.000000000  | 0.932897449  | 3.899999089  |
| H | 0.816399334  | 0.932897449  | 2.486099272  |
| H | 6.457698847  | 0.932897449  | 0.941899960  |
| H | 0.834099172  | 0.932897449  | 5.475598892  |
| H | 6.494400000  | 0.932897449  | 9.814799089  |
| H | 7.310799334  | 0.932897449  | 8.400899272  |
| H | -0.036701153 | 0.932897449  | 6.856699960  |
| H | 7.328499172  | 0.932897449  | -0.439201108 |
| H | 6.494400000  | 0.932897449  | 3.899999089  |

|   |              |              |              |
|---|--------------|--------------|--------------|
| H | 7.310799334  | 0.932897449  | 2.486099272  |
| H | -0.036701153 | 0.932897449  | 0.941899960  |
| H | 7.328499172  | 0.932897449  | 5.475598892  |
| H | 7.213990690  | 21.830319656 | -0.043790340 |
| H | 7.311892731  | 21.608281941 | 8.877635583  |
| H | 5.636584318  | 21.973764555 | 5.884795403  |
| H | 7.222535113  | 21.971075274 | 5.761128054  |

5-a:

|    |             |             |              |
|----|-------------|-------------|--------------|
| Ti | 3.247200000 | 3.247194072 | 1.478700000  |
| Ti | 3.247200000 | 3.247194072 | 4.436100000  |
| Ti | 0.000000000 | 3.247194072 | 2.957400000  |
| Ti | 0.000000000 | 3.247194072 | 0.000000000  |
| Ti | 3.247200000 | 3.247194072 | 7.393500000  |
| Ti | 3.247200000 | 3.247194072 | 10.350900000 |
| Ti | 0.000000000 | 3.247194072 | 8.872200000  |
| Ti | 0.000000000 | 3.247194072 | 5.914800000  |
| Ti | 9.741600000 | 3.247194072 | 1.478700000  |
| Ti | 9.741600000 | 3.247194072 | 4.436100000  |
| Ti | 6.494400000 | 3.247194072 | 2.957400000  |
| Ti | 6.494400000 | 3.247194072 | 0.000000000  |
| Ti | 9.741600000 | 3.247194072 | 7.393500000  |
| Ti | 9.741600000 | 3.247194072 | 10.350900000 |

|    |              |             |              |
|----|--------------|-------------|--------------|
| Ti | 6.494400000  | 3.247194072 | 8.872200000  |
| Ti | 6.494400000  | 3.247194072 | 5.914800000  |
| Ti | 0.000000000  | 6.494391717 | 4.436100000  |
| Ti | 0.000000000  | 6.494391717 | 1.478700000  |
| Ti | 3.247200000  | 6.494391717 | 2.957400000  |
| Ti | 3.247200000  | 6.494391717 | 0.000000000  |
| Ti | 0.000000000  | 6.494391717 | 10.350900000 |
| Ti | 0.000000000  | 6.494391717 | 7.393500000  |
| Ti | 3.247200000  | 6.494391717 | 8.872200000  |
| Ti | 3.247200000  | 6.494391717 | 5.914800000  |
| Ti | 6.494400000  | 6.494391717 | 4.436100000  |
| Ti | 6.494400000  | 6.494391717 | 1.478700000  |
| Ti | 9.741600000  | 6.494391717 | 2.957400000  |
| Ti | 9.741600000  | 6.494391717 | 0.000000000  |
| Ti | 6.494400000  | 6.494391717 | 10.350900000 |
| Ti | 6.494400000  | 6.494391717 | 7.393500000  |
| Ti | 9.741600000  | 6.494391717 | 8.872200000  |
| Ti | 9.741600000  | 6.494391717 | 5.914800000  |
| Ti | 3.232376272  | 9.741160019 | 1.479953110  |
| Ti | 3.233477333  | 9.742225516 | 4.437836112  |
| Ti | -0.012531724 | 9.766284031 | 2.966218020  |
| Ti | -0.013071928 | 9.798668281 | 0.007395866  |

|    |              |              |              |
|----|--------------|--------------|--------------|
| Ti | 3.233279124  | 9.742391609  | 7.393819636  |
| Ti | 3.233026751  | 9.739955218  | 10.351537970 |
| Ti | -0.012994515 | 9.790907620  | 8.883652117  |
| Ti | -0.013797223 | 9.770721756  | 5.926793558  |
| Ti | 9.731486531  | 9.740486716  | 1.480950108  |
| Ti | 9.729613286  | 9.747134374  | 4.437377952  |
| Ti | 6.481727997  | 9.765739316  | 2.965041094  |
| Ti | 6.480339754  | 9.768563616  | 0.012173841  |
| Ti | 9.728594055  | 9.740820688  | 7.392049809  |
| Ti | 9.729117633  | 9.740071304  | 10.351350944 |
| Ti | 6.480753967  | 9.766066502  | 8.887245240  |
| Ti | 6.480481462  | 9.734676310  | 5.927086223  |
| Ti | -0.027768626 | 13.112924370 | 1.472025148  |
| Ti | -0.028716678 | 13.054159157 | 4.456201330  |
| Ti | 3.221266952  | 12.998165022 | 2.965430879  |
| Ti | 3.217130408  | 13.001877295 | 5.922943852  |
| Ti | 6.463522245  | 13.141584561 | 1.432805411  |
| Ti | 6.466178455  | 13.014755056 | 4.415051120  |
| Ti | 9.709122804  | 13.001783711 | 2.963854940  |
| Ti | 9.714203893  | 13.005207374 | 5.922798939  |
| Ti | -0.029488862 | 13.106921439 | 7.452308490  |
| Ti | -0.029673823 | 13.184342316 | 10.377734028 |



|    |              |              |              |
|----|--------------|--------------|--------------|
| Ti | 3.220690768  | 12.998327186 | 8.880411990  |
| Ti | 3.213440940  | 12.999179083 | 0.005765037  |
| Ti | 6.466714373  | 13.019786788 | 7.426357660  |
| Ti | 6.466199886  | 13.136252075 | 10.406164224 |
| Ti | 9.710465976  | 12.995178915 | 8.881046293  |
| Ti | 9.715724492  | 12.998412554 | 0.009140850  |
| Ti | 9.691101104  | 16.318409754 | 1.484285109  |
| Ti | 9.692958892  | 16.320360010 | 4.439632792  |
| Ti | 6.446188302  | 16.335499497 | 2.943512878  |
| Ti | -0.050686974 | 16.362351950 | 5.926614931  |
| Ti | 3.205735984  | 16.316977066 | 1.480689502  |
| Ti | 3.200558518  | 16.312971897 | 4.438931770  |
| Ti | -0.042047473 | 16.374614631 | 2.958854449  |
| Ti | 6.447511861  | 16.285919060 | 5.920435740  |
| Ti | 3.211510025  | 16.317900401 | 7.400200167  |
| Ti | 3.202782720  | 16.322948921 | 10.357240192 |
| Ti | -0.043993325 | 16.543257481 | 8.876834009  |
| Ti | 6.446676031  | 16.773000493 | 0.010043922  |
| Ti | 9.681237929  | 16.315691540 | 7.400856118  |
| Ti | 9.694010466  | 16.316960992 | 10.359693415 |
| Ti | 6.448629287  | 16.337451182 | 8.909663988  |
| Ti | -0.046201032 | 16.555136540 | 0.006539758  |

|    |              |              |              |
|----|--------------|--------------|--------------|
| Ti | 6.436909493  | 19.589141558 | 7.604396689  |
| Ti | 6.433767762  | 20.124758647 | 10.378019831 |
| Ti | 3.200425643  | 19.575791235 | 8.877204867  |
| Ti | 3.189090707  | 19.574392837 | 0.008108954  |
| Ti | 6.438787933  | 20.127711535 | 1.463010993  |
| Ti | 6.441194628  | 19.597164397 | 4.237477704  |
| Ti | 3.202063271  | 19.563102069 | 2.964528162  |
| Ti | 3.206498556  | 19.548960213 | 5.918632199  |
| Ti | -0.065995573 | 19.877299738 | 1.398679617  |
| Ti | -0.075850565 | 19.639518171 | 4.445677008  |
| Ti | 9.676578717  | 19.567767324 | 2.962258890  |
| Ti | 9.667380828  | 19.550736517 | 5.921944605  |
| Ti | -0.067828293 | 19.871411108 | 7.487539050  |
| Ti | -0.054266687 | 20.004288906 | 10.355261219 |
| Ti | 9.672236691  | 19.567212609 | 8.878818070  |
| Ti | 9.680864501  | 19.568250602 | 0.003740756  |
| O  | 0.000000000  | 1.266694833  | 2.957400000  |
| O  | 0.000000000  | 1.266694833  | 0.000000000  |
| O  | 0.000000000  | 1.266694833  | 8.872200000  |
| O  | 0.000000000  | 1.266694833  | 5.914800000  |
| O  | 6.494400000  | 1.266694833  | 2.957400000  |
| O  | 6.494400000  | 1.266694833  | 0.000000000  |

|   |              |             |              |
|---|--------------|-------------|--------------|
| O | 6.494400000  | 1.266694833 | 8.872200000  |
| O | 6.494400000  | 1.266694833 | 5.914800000  |
| O | 9.741600000  | 1.980495667 | 8.872200000  |
| O | 9.741600000  | 1.980495667 | 5.914800000  |
| O | 9.741600000  | 1.980495667 | 2.957400000  |
| O | 9.741600000  | 1.980495667 | 0.000000000  |
| O | 3.247200000  | 1.980495667 | 8.872200000  |
| O | 3.247200000  | 1.980495667 | 5.914800000  |
| O | 3.247200000  | 1.980495667 | 2.957400000  |
| O | 3.247200000  | 1.980495667 | 0.000000000  |
| O | 1.266698949  | 3.247194072 | 1.478700000  |
| O | 1.266698949  | 3.247194072 | 4.436100000  |
| O | 5.227599738  | 3.247194072 | 1.478700000  |
| O | 5.227599738  | 3.247194072 | 4.436100000  |
| O | 1.266698949  | 3.247194072 | 7.393500000  |
| O | 1.266698949  | 3.247194072 | 10.350900000 |
| O | 5.227599738  | 3.247194072 | 7.393500000  |
| O | 5.227599738  | 3.247194072 | 10.350900000 |
| O | 7.761098949  | 3.247194072 | 1.478700000  |
| O | 7.761098949  | 3.247194072 | 4.436100000  |
| O | 11.721999738 | 3.247194072 | 1.478700000  |
| O | 11.721999738 | 3.247194072 | 4.436100000  |

|   |              |             |              |
|---|--------------|-------------|--------------|
| O | 7.761098949  | 3.247194072 | 7.393500000  |
| O | 7.761098949  | 3.247194072 | 10.350900000 |
| O | 11.721999738 | 3.247194072 | 7.393500000  |
| O | 11.721999738 | 3.247194072 | 10.350900000 |
| O | 9.741600000  | 4.513896049 | 8.872200000  |
| O | 9.741600000  | 4.513896049 | 5.914800000  |
| O | 9.741600000  | 4.513896049 | 2.957400000  |
| O | 9.741600000  | 4.513896049 | 0.000000000  |
| O | 3.247200000  | 4.513896049 | 8.872200000  |
| O | 3.247200000  | 4.513896049 | 5.914800000  |
| O | 3.247200000  | 4.513896049 | 2.957400000  |
| O | 3.247200000  | 4.513896049 | 0.000000000  |
| O | 0.000000000  | 5.227596870 | 2.957400000  |
| O | 0.000000000  | 5.227596870 | 0.000000000  |
| O | 0.000000000  | 5.227596870 | 8.872200000  |
| O | 0.000000000  | 5.227596870 | 5.914800000  |
| O | 6.494400000  | 5.227596870 | 0.000000000  |
| O | 6.494400000  | 5.227596870 | 2.957400000  |
| O | 6.494400000  | 5.227596870 | 8.872200000  |
| O | 6.494400000  | 5.227596870 | 5.914800000  |
| O | 8.474899752  | 6.494391717 | 7.393500000  |
| O | 11.008298949 | 6.494391717 | 7.393500000  |

|   |              |             |              |
|---|--------------|-------------|--------------|
| O | 8.474899752  | 6.494391717 | 10.350900000 |
| O | 11.008298949 | 6.494391717 | 10.350900000 |
| O | 8.474899752  | 6.494391717 | 1.478700000  |
| O | 11.008298949 | 6.494391717 | 1.478700000  |
| O | 8.474899752  | 6.494391717 | 4.436100000  |
| O | 11.008298949 | 6.494391717 | 4.436100000  |
| O | 1.980499752  | 6.494391717 | 1.478700000  |
| O | 4.513898949  | 6.494391717 | 1.478700000  |
| O | 1.980499752  | 6.494391717 | 4.436100000  |
| O | 4.513898949  | 6.494391717 | 4.436100000  |
| O | 1.980499752  | 6.494391717 | 7.393500000  |
| O | 4.513898949  | 6.494391717 | 7.393500000  |
| O | 1.980499752  | 6.494391717 | 10.350900000 |
| O | 4.513898949  | 6.494391717 | 10.350900000 |
| O | 0.000000000  | 7.761086550 | 8.872200000  |
| O | 0.000000000  | 7.761086550 | 5.914800000  |
| O | 6.494400000  | 7.761086550 | 2.957400000  |
| O | 6.494400000  | 7.761086550 | 0.000000000  |
| O | 0.000000000  | 7.761086550 | 2.957400000  |
| O | 0.000000000  | 7.761086550 | 0.000000000  |
| O | 6.494400000  | 7.761086550 | 8.872200000  |
| O | 6.494400000  | 7.761086550 | 5.914800000  |

|   |              |             |              |
|---|--------------|-------------|--------------|
| O | 3.247200000  | 8.474887384 | 2.957400000  |
| O | 3.247200000  | 8.474887384 | 0.000000000  |
| O | 3.247200000  | 8.474887384 | 8.872200000  |
| O | 3.247200000  | 8.474887384 | 5.914800000  |
| O | 9.741600000  | 8.474887384 | 2.957400000  |
| O | 9.741600000  | 8.474887384 | 0.000000000  |
| O | 9.741600000  | 8.474887384 | 8.872200000  |
| O | 9.741600000  | 8.474887384 | 5.914800000  |
| O | 1.265559961  | 9.788101537 | 1.484491536  |
| O | 1.265054047  | 9.785011846 | 4.441339448  |
| O | 5.210031477  | 9.775314859 | 1.484568191  |
| O | 5.210609868  | 9.773616422 | 4.443259392  |
| O | 1.265213940  | 9.785704437 | 7.398031801  |
| O | 1.265702059  | 9.790395767 | 10.356108573 |
| O | 5.210257092  | 9.773791087 | 7.397736061  |
| O | 5.209774169  | 9.776382142 | 10.356318667 |
| O | 7.759517303  | 9.783844193 | 1.483839961  |
| O | 7.758974891  | 9.781103119 | 4.443856314  |
| O | 11.705102478 | 9.782110036 | 1.484594690  |
| O | 11.705108453 | 9.778528852 | 4.441060861  |
| O | 7.759053473  | 9.781850002 | 7.397219108  |
| O | 7.759403391  | 9.783819547 | 10.356502853 |

|   |              |              |              |
|---|--------------|--------------|--------------|
| O | 11.704611502 | 9.780107988  | 7.398565908  |
| O | 11.704562144 | 9.782963720  | 10.356142524 |
| O | 9.731144665  | 11.072628354 | 2.961644934  |
| O | 9.730707592  | 11.072301525 | 0.003231610  |
| O | 3.237229797  | 11.072039705 | 2.961754239  |
| O | 3.237934180  | 11.073247007 | 0.003249000  |
| O | 3.237222264  | 11.072392251 | 8.873692304  |
| O | 3.238089396  | 11.073022334 | 5.917486975  |
| O | 9.730709411  | 11.071416052 | 8.873594946  |
| O | 9.729732393  | 11.073956743 | 5.917772660  |
| O | 6.466050905  | 11.795111756 | 8.876810113  |
| O | -0.027016314 | 11.811225657 | 2.965541249  |
| O | 6.465239235  | 11.799158716 | 0.006424892  |
| O | 6.465427442  | 11.798073216 | 5.921674772  |
| O | -0.027075413 | 11.817544700 | 0.008259782  |
| O | -0.027494822 | 11.808857489 | 5.923361910  |
| O | 6.465691635  | 11.794058403 | 2.966141720  |
| O | -0.027272453 | 11.813984590 | 8.878016141  |
| O | 8.441913915  | 13.090070299 | 1.489062611  |
| O | 8.437283018  | 13.094099399 | 4.444236399  |
| O | 10.979994406 | 13.113974508 | 1.488250628  |
| O | 10.980350558 | 13.117120278 | 4.443352136  |

|   |              |              |              |
|---|--------------|--------------|--------------|
| O | 1.951285083  | 13.100215559 | 1.487906386  |
| O | 1.950034132  | 13.103077363 | 4.443214085  |
| O | 4.488161382  | 13.107652250 | 1.487802049  |
| O | 4.493437303  | 13.109370332 | 4.444111951  |
| O | 1.951081289  | 13.104427898 | 7.396861736  |
| O | 1.951249234  | 13.099344373 | 10.355847494 |
| O | 4.493046989  | 13.107252554 | 7.398891340  |
| O | 4.487963303  | 13.107985150 | 10.353490801 |
| O | 8.437802960  | 13.092063061 | 7.398739566  |
| O | 8.442791179  | 13.090574294 | 10.353854206 |
| O | 10.979140782 | 13.119582744 | 7.397349943  |
| O | 10.979354707 | 13.113677326 | 10.356603878 |
| O | -0.030119469 | 14.427716945 | 2.965731232  |
| O | -0.031497840 | 14.426030652 | 5.918203731  |
| O | -0.029335205 | 14.428214510 | 8.878672921  |
| O | -0.028917095 | 14.430222631 | 0.014208296  |
| O | 6.464154021  | 14.411923086 | 2.972616651  |
| O | 6.463942693  | 14.416406889 | 5.924345186  |
| O | 6.464845804  | 14.412986440 | 8.871833282  |
| O | 6.467429146  | 14.382822124 | 0.005242051  |
| O | 9.680085823  | 15.111312386 | 8.883275345  |
| O | 3.210588340  | 15.113962376 | 8.882291477  |



|   |              |              |              |
|---|--------------|--------------|--------------|
| O | 9.678872669  | 15.109077807 | 5.922175992  |
| O | 9.680460420  | 15.109517507 | 2.961513743  |
| O | 3.212314551  | 15.109726821 | 2.959184495  |
| O | 9.694628603  | 15.110292966 | 0.006426785  |
| O | 3.196884376  | 15.112971175 | 0.003233030  |
| O | 3.212918270  | 15.109046731 | 5.922595352  |
| O | 1.239582361  | 16.471545925 | 10.357775245 |
| O | 5.170713600  | 16.467687204 | 4.443928711  |
| O | 5.172093011  | 16.471331611 | 7.402871173  |
| O | 7.723339339  | 16.462462947 | 1.467864205  |
| O | 7.721343090  | 16.475870779 | 4.442342362  |
| O | 5.168789959  | 16.456149976 | 10.380782871 |
| O | 11.655473832 | 16.459745805 | 1.484314565  |
| O | 11.652752679 | 16.441125504 | 4.441160466  |
| O | 1.241085815  | 16.448591484 | 4.442984472  |
| O | 1.241031262  | 16.466863525 | 1.483051873  |
| O | 5.169413161  | 16.453641789 | 1.467461880  |
| O | 7.720534797  | 16.480629975 | 7.403940332  |
| O | 7.725327015  | 16.466001269 | 10.380287920 |
| O | 1.240274015  | 16.456152119 | 7.401224374  |
| O | 11.653738918 | 16.447716012 | 7.403542029  |
| O | 11.657310189 | 16.462755843 | 10.357590585 |

|   |              |              |              |
|---|--------------|--------------|--------------|
| O | 3.206134870  | 17.748117055 | 8.875948445  |
| O | 3.209904739  | 17.748467101 | 0.010448967  |
| O | 9.676466753  | 17.741066129 | 2.963799222  |
| O | 9.686948195  | 17.730251853 | 5.922574531  |
| O | 3.205880549  | 17.739433058 | 2.965846453  |
| O | 3.193482739  | 17.729485324 | 5.918753216  |
| O | 9.683138580  | 17.741734789 | 8.879393107  |
| O | 9.680710973  | 17.743594676 | 0.007965225  |
| O | 6.433635926  | 18.625067160 | 0.010829526  |
| O | 6.441832378  | 18.683109421 | 5.918759131  |
| O | -0.048441730 | 18.511520471 | 0.009693411  |
| O | 6.439839377  | 18.456807218 | 2.855212958  |
| O | -0.054137059 | 18.494797919 | 5.920642166  |
| O | 6.433730744  | 18.452733469 | 8.993821301  |
| O | -0.049223785 | 18.508775110 | 8.870551664  |
| O | -0.052585806 | 18.492495474 | 2.974216250  |
| O | 1.961289057  | 19.965622402 | 4.443260339  |
| O | 4.414219001  | 19.992409133 | 1.484266418  |
| O | 4.449738044  | 19.941552100 | 4.454285999  |
| O | 1.969682030  | 19.967276905 | 7.387611343  |
| O | 1.957011066  | 19.934771210 | 10.350541563 |
| O | 4.452481408  | 19.938422046 | 7.382528401  |

|   |              |              |              |
|---|--------------|--------------|--------------|
| O | 4.414292258  | 19.990926081 | 10.364199546 |
| O | 8.463080464  | 19.986730173 | 1.480112454  |
| O | 8.432718494  | 19.946831722 | 4.453558952  |
| O | 10.928905688 | 19.917472154 | 1.501314646  |
| O | 10.922394143 | 19.902311950 | 4.444769441  |
| O | 8.425922624  | 19.933783938 | 7.388145095  |
| O | 8.454905832  | 19.971431022 | 10.363594817 |
| O | 10.911583955 | 19.931787961 | 7.391830843  |
| O | 10.918382163 | 19.935706690 | 10.350966127 |
| O | 1.951600971  | 19.951677715 | 1.505531780  |
| O | 6.439467247  | 21.060519329 | 3.051616849  |
| O | -0.076610800 | 21.130366354 | 2.988047181  |
| O | -0.073794309 | 21.129239063 | 5.904346656  |
| O | -0.051060402 | 21.103199217 | 8.856714107  |
| O | -0.051219384 | 21.103757861 | 0.025306827  |
| O | 6.439772874  | 21.054309943 | 8.789323833  |
| O | 6.440795872  | 21.265867354 | 0.005832466  |
| H | 0.000000000  | 0.932897449  | 9.814799089  |
| H | 0.816399334  | 0.932897449  | 8.400899272  |
| H | 6.457698847  | 0.932897449  | 6.856699960  |
| H | 0.834099172  | 0.932897449  | -0.439201108 |
| H | 0.000000000  | 0.932897449  | 3.899999089  |

|   |              |              |              |
|---|--------------|--------------|--------------|
| H | 0.816399334  | 0.932897449  | 2.486099272  |
| H | 6.457698847  | 0.932897449  | 0.941899960  |
| H | 0.834099172  | 0.932897449  | 5.475598892  |
| H | 6.494400000  | 0.932897449  | 9.814799089  |
| H | 7.310799334  | 0.932897449  | 8.400899272  |
| H | -0.036701153 | 0.932897449  | 6.856699960  |
| H | 7.328499172  | 0.932897449  | -0.439201108 |
| H | 6.494400000  | 0.932897449  | 3.899999089  |
| H | 7.310799334  | 0.932897449  | 2.486099272  |
| H | -0.036701153 | 0.932897449  | 0.941899960  |
| H | 7.328499172  | 0.932897449  | 5.475598892  |
| H | 0.638493819  | 21.787983385 | 2.999956040  |
| H | 0.640170283  | 21.788494523 | 5.902559085  |

TS5-1:

|    |             |             |              |
|----|-------------|-------------|--------------|
| Ti | 3.247200000 | 3.247190143 | 1.478700000  |
| Ti | 3.247200000 | 3.247190143 | 4.436100000  |
| Ti | 0.000000000 | 3.247190143 | 2.957400000  |
| Ti | 0.000000000 | 3.247190143 | 0.000000000  |
| Ti | 3.247200000 | 3.247190143 | 7.393500000  |
| Ti | 3.247200000 | 3.247190143 | 10.350900000 |
| Ti | 0.000000000 | 3.247190143 | 8.872200000  |
| Ti | 0.000000000 | 3.247190143 | 5.914800000  |

|    |             |             |              |
|----|-------------|-------------|--------------|
| Ti | 9.741600000 | 3.247190143 | 1.478700000  |
| Ti | 9.741600000 | 3.247190143 | 4.436100000  |
| Ti | 6.494400000 | 3.247190143 | 2.957400000  |
| Ti | 6.494400000 | 3.247190143 | 0.000000000  |
| Ti | 9.741600000 | 3.247190143 | 7.393500000  |
| Ti | 9.741600000 | 3.247190143 | 10.350900000 |
| Ti | 6.494400000 | 3.247190143 | 8.872200000  |
| Ti | 6.494400000 | 3.247190143 | 5.914800000  |
| Ti | 0.000000000 | 6.494389931 | 4.436100000  |
| Ti | 0.000000000 | 6.494389931 | 1.478700000  |
| Ti | 3.247200000 | 6.494389931 | 2.957400000  |
| Ti | 3.247200000 | 6.494389931 | 0.000000000  |
| Ti | 0.000000000 | 6.494389931 | 10.350900000 |
| Ti | 0.000000000 | 6.494389931 | 7.393500000  |
| Ti | 3.247200000 | 6.494389931 | 8.872200000  |
| Ti | 3.247200000 | 6.494389931 | 5.914800000  |
| Ti | 6.494400000 | 6.494389931 | 4.436100000  |
| Ti | 6.494400000 | 6.494389931 | 1.478700000  |
| Ti | 9.741600000 | 6.494389931 | 2.957400000  |
| Ti | 9.741600000 | 6.494389931 | 0.000000000  |
| Ti | 6.494400000 | 6.494389931 | 10.350900000 |
| Ti | 6.494400000 | 6.494389931 | 7.393500000  |

|    |              |              |              |
|----|--------------|--------------|--------------|
| Ti | 9.741600000  | 6.494389931  | 8.872200000  |
| Ti | 9.741600000  | 6.494389931  | 5.914800000  |
| Ti | 3.233591374  | 9.742260877  | 1.481087213  |
| Ti | 3.232187285  | 9.749910810  | 4.436084976  |
| Ti | -0.007476223 | 9.784631439  | 2.957742349  |
| Ti | -0.012052697 | 9.801097172  | -0.002297072 |
| Ti | 3.234255881  | 9.744732273  | 7.389866538  |
| Ti | 3.235189127  | 9.738339648  | 10.350134980 |
| Ti | -0.006185137 | 9.816061278  | 8.872437420  |
| Ti | -0.018534108 | 9.770066313  | 5.918439613  |
| Ti | 9.737112759  | 9.741200381  | 1.481244902  |
| Ti | 9.729511973  | 9.748902463  | 4.436478311  |
| Ti | 6.482390945  | 9.765263182  | 2.951083230  |
| Ti | 6.487481386  | 9.773331384  | -0.000424564 |
| Ti | 9.727977606  | 9.742516625  | 7.390870871  |
| Ti | 9.735517345  | 9.740696386  | 10.350098545 |
| Ti | 6.483078962  | 9.765856475  | 8.875981568  |
| Ti | 6.479957623  | 9.738852573  | 5.912753716  |
| Ti | -0.025293740 | 13.129768010 | 1.440569295  |
| Ti | -0.025249967 | 13.051515238 | 4.446812176  |
| Ti | 3.221236558  | 13.009178253 | 2.950871717  |
| Ti | 3.224243985  | 13.014431800 | 5.908502039  |

|    |              |              |              |
|----|--------------|--------------|--------------|
| Ti | 6.469530994  | 13.145514719 | 1.426555123  |
| Ti | 6.470126660  | 13.023500847 | 4.406774303  |
| Ti | 9.716487714  | 13.005932470 | 2.949199012  |
| Ti | 9.716660725  | 13.011051356 | 5.907797232  |
| Ti | -0.023031870 | 13.134856892 | 7.439023258  |
| Ti | -0.023091619 | 13.206722753 | 10.369665058 |
| Ti | 3.223625848  | 12.999636286 | 8.863969438  |
| Ti | 3.221349171  | 12.998166093 | -0.008230444 |
| Ti | 6.471656351  | 13.024604563 | 7.421425427  |
| Ti | 6.470797402  | 13.147183153 | 10.398868082 |
| Ti | 9.720049892  | 12.998759742 | 8.864691871  |
| Ti | 9.717866995  | 12.999307314 | -0.008985764 |
| Ti | 9.714900093  | 16.324142292 | 1.475770754  |
| Ti | 9.712672644  | 16.327220196 | 4.435225201  |
| Ti | 6.472615834  | 16.346329847 | 2.930721649  |
| Ti | -0.010063462 | 16.386933034 | 5.923613998  |
| Ti | 3.222054722  | 16.319225575 | 1.472188160  |
| Ti | 3.224878228  | 16.339239631 | 4.431559563  |
| Ti | -0.036279797 | 16.365060163 | 2.951244231  |
| Ti | 6.467653463  | 16.293353251 | 5.913059748  |
| Ti | 3.232095324  | 16.343173004 | 7.390886605  |
| Ti | 3.218910913  | 16.322921060 | 10.346657196 |

|    |              |              |              |
|----|--------------|--------------|--------------|
| Ti | -0.030279231 | 16.589961111 | 8.877805574  |
| Ti | 6.465149352  | 16.788448592 | -0.002135834 |
| Ti | 9.711685625  | 16.324231589 | 7.397323445  |
| Ti | 9.723027575  | 16.327038743 | 10.354809919 |
| Ti | 6.474608446  | 16.350624696 | 8.900246207  |
| Ti | -0.019651405 | 16.694707359 | 0.008975472  |
| Ti | 6.464683834  | 19.614209849 | 7.596325826  |
| Ti | 6.482080383  | 20.141049714 | 10.369755318 |
| Ti | 3.241105785  | 19.585603237 | 8.867318752  |
| Ti | 3.213377425  | 19.572618675 | -0.027052166 |
| Ti | 6.491620657  | 20.150031965 | 1.445200584  |
| Ti | 6.469059760  | 19.622260548 | 4.227899750  |
| Ti | 3.334738797  | 19.568834250 | 2.906804564  |
| Ti | 3.224555326  | 19.612120289 | 5.922718261  |
| Ti | 0.005997708  | 20.032396881 | 1.545089490  |
| Ti | -0.219549686 | 19.607355020 | 4.443275126  |
| Ti | 9.671664794  | 19.579349916 | 2.940234304  |
| Ti | 9.635172760  | 19.561951918 | 5.951170342  |
| Ti | -0.020400079 | 19.912182888 | 7.507910923  |
| Ti | -0.013115181 | 20.052765983 | 10.416528018 |
| Ti | 9.724524664  | 19.580611867 | 8.891856182  |
| Ti | 9.750313536  | 19.583621191 | 0.004622298  |



|   |             |             |              |
|---|-------------|-------------|--------------|
| O | 0.000000000 | 1.266689833 | 2.957400000  |
| O | 0.000000000 | 1.266689833 | 0.000000000  |
| O | 0.000000000 | 1.266689833 | 8.872200000  |
| O | 0.000000000 | 1.266689833 | 5.914800000  |
| O | 6.494400000 | 1.266689833 | 2.957400000  |
| O | 6.494400000 | 1.266689833 | 0.000000000  |
| O | 6.494400000 | 1.266689833 | 8.872200000  |
| O | 6.494400000 | 1.266689833 | 5.914800000  |
| O | 9.741600000 | 1.980499953 | 8.872200000  |
| O | 9.741600000 | 1.980499953 | 5.914800000  |
| O | 9.741600000 | 1.980499953 | 2.957400000  |
| O | 9.741600000 | 1.980499953 | 0.000000000  |
| O | 3.247200000 | 1.980499953 | 8.872200000  |
| O | 3.247200000 | 1.980499953 | 5.914800000  |
| O | 3.247200000 | 1.980499953 | 2.957400000  |
| O | 3.247200000 | 1.980499953 | 0.000000000  |
| O | 1.266699988 | 3.247190143 | 1.478700000  |
| O | 1.266699988 | 3.247190143 | 4.436100000  |
| O | 5.227599998 | 3.247190143 | 1.478700000  |
| O | 5.227599998 | 3.247190143 | 4.436100000  |
| O | 1.266699988 | 3.247190143 | 7.393500000  |
| O | 1.266699988 | 3.247190143 | 10.350900000 |

|   |              |             |              |
|---|--------------|-------------|--------------|
| O | 5.227599998  | 3.247190143 | 7.393500000  |
| O | 5.227599998  | 3.247190143 | 10.350900000 |
| O | 7.761099988  | 3.247190143 | 1.478700000  |
| O | 7.761099988  | 3.247190143 | 4.436100000  |
| O | 11.721999998 | 3.247190143 | 1.478700000  |
| O | 11.721999998 | 3.247190143 | 4.436100000  |
| O | 7.761099988  | 3.247190143 | 7.393500000  |
| O | 7.761099988  | 3.247190143 | 10.350900000 |
| O | 11.721999998 | 3.247190143 | 7.393500000  |
| O | 11.721999998 | 3.247190143 | 10.350900000 |
| O | 9.741600000  | 4.513899978 | 8.872200000  |
| O | 9.741600000  | 4.513899978 | 5.914800000  |
| O | 9.741600000  | 4.513899978 | 2.957400000  |
| O | 9.741600000  | 4.513899978 | 0.000000000  |
| O | 3.247200000  | 4.513899978 | 8.872200000  |
| O | 3.247200000  | 4.513899978 | 5.914800000  |
| O | 3.247200000  | 4.513899978 | 2.957400000  |
| O | 3.247200000  | 4.513899978 | 0.000000000  |
| O | 0.000000000  | 5.227600085 | 2.957400000  |
| O | 0.000000000  | 5.227600085 | 0.000000000  |
| O | 0.000000000  | 5.227600085 | 8.872200000  |
| O | 0.000000000  | 5.227600085 | 5.914800000  |

|   |              |             |              |
|---|--------------|-------------|--------------|
| O | 6.494400000  | 5.227600085 | 0.000000000  |
| O | 6.494400000  | 5.227600085 | 2.957400000  |
| O | 6.494400000  | 5.227600085 | 8.872200000  |
| O | 6.494400000  | 5.227600085 | 5.914800000  |
| O | 8.474900012  | 6.494389931 | 7.393500000  |
| O | 11.008299988 | 6.494389931 | 7.393500000  |
| O | 8.474900012  | 6.494389931 | 10.350900000 |
| O | 11.008299988 | 6.494389931 | 10.350900000 |
| O | 8.474900012  | 6.494389931 | 1.478700000  |
| O | 11.008299988 | 6.494389931 | 1.478700000  |
| O | 8.474900012  | 6.494389931 | 4.436100000  |
| O | 11.008299988 | 6.494389931 | 4.436100000  |
| O | 1.980500012  | 6.494389931 | 1.478700000  |
| O | 4.513899988  | 6.494389931 | 1.478700000  |
| O | 1.980500012  | 6.494389931 | 4.436100000  |
| O | 4.513899988  | 6.494389931 | 4.436100000  |
| O | 1.980500012  | 6.494389931 | 7.393500000  |
| O | 4.513899988  | 6.494389931 | 7.393500000  |
| O | 1.980500012  | 6.494389931 | 10.350900000 |
| O | 4.513899988  | 6.494389931 | 10.350900000 |
| O | 0.000000000  | 7.761090122 | 8.872200000  |
| O | 0.000000000  | 7.761090122 | 5.914800000  |

|   |             |             |              |
|---|-------------|-------------|--------------|
| O | 6.494400000 | 7.761090122 | 2.957400000  |
| O | 6.494400000 | 7.761090122 | 0.000000000  |
| O | 0.000000000 | 7.761090122 | 2.957400000  |
| O | 0.000000000 | 7.761090122 | 0.000000000  |
| O | 6.494400000 | 7.761090122 | 8.872200000  |
| O | 6.494400000 | 7.761090122 | 5.914800000  |
| O | 3.247200000 | 8.474889884 | 2.957400000  |
| O | 3.247200000 | 8.474889884 | 0.000000000  |
| O | 3.247200000 | 8.474889884 | 8.872200000  |
| O | 3.247200000 | 8.474889884 | 5.914800000  |
| O | 9.741600000 | 8.474889884 | 2.957400000  |
| O | 9.741600000 | 8.474889884 | 0.000000000  |
| O | 9.741600000 | 8.474889884 | 8.872200000  |
| O | 9.741600000 | 8.474889884 | 5.914800000  |
| O | 1.267336699 | 9.788922716 | 1.478973264  |
| O | 1.266028078 | 9.785240090 | 4.438569074  |
| O | 5.211725606 | 9.781635331 | 1.477765935  |
| O | 5.211090324 | 9.779809020 | 4.436826337  |
| O | 1.266628810 | 9.787301075 | 7.389495207  |
| O | 1.268000427 | 9.792240295 | 10.350976892 |
| O | 5.211125394 | 9.780120132 | 7.391916017  |
| O | 5.211809384 | 9.781713913 | 10.350776854 |

|   |              |              |              |
|---|--------------|--------------|--------------|
| O | 7.761347944  | 9.784896116  | 1.478984738  |
| O | 7.759176866  | 9.782556524  | 4.437615845  |
| O | 11.706094173 | 9.786585624  | 1.480102399  |
| O | 11.704781006 | 9.781416731  | 4.435757533  |
| O | 7.759340655  | 9.783095880  | 7.390783451  |
| O | 7.761682146  | 9.785365464  | 10.349606670 |
| O | 11.704810490 | 9.783855980  | 7.393077092  |
| O | 11.705827253 | 9.789873913  | 10.349464241 |
| O | 9.729593673  | 11.076606019 | 2.958641043  |
| O | 9.728589639  | 11.075789126 | -0.000560960 |
| O | 3.236257715  | 11.078079069 | 2.958900821  |
| O | 3.237992499  | 11.076068805 | -0.001026691 |
| O | 3.236472420  | 11.076872840 | 8.868857310  |
| O | 3.237244864  | 11.081555240 | 5.913674177  |
| O | 9.730447686  | 11.075669110 | 8.868773793  |
| O | 9.728938258  | 11.078742013 | 5.914047401  |
| O | 6.474211638  | 11.801275779 | 8.867939215  |
| O | -0.018033000 | 11.809916913 | 2.965437977  |
| O | 6.474556231  | 11.805041988 | -0.001619827 |
| O | 6.473638053  | 11.805455614 | 5.913661164  |
| O | -0.018905458 | 11.813535960 | 0.001021368  |
| O | -0.020869105 | 11.814307133 | 5.915073382  |

|   |              |              |              |
|---|--------------|--------------|--------------|
| O | 6.474163579  | 11.801235060 | 2.959813357  |
| O | -0.017342776 | 11.817132861 | 8.861456239  |
| O | 8.448755895  | 13.105119417 | 1.480389858  |
| O | 8.443623241  | 13.107765836 | 4.435392827  |
| O | 10.983974044 | 13.112620402 | 1.479473183  |
| O | 10.985689215 | 13.122941756 | 4.435254302  |
| O | 1.959189028  | 13.109409623 | 1.480813121  |
| O | 1.958346964  | 13.120302124 | 4.435679221  |
| O | 4.494625388  | 13.111521686 | 1.479982447  |
| O | 4.500255773  | 13.116295884 | 4.435616051  |
| O | 1.960144094  | 13.121731598 | 7.386186468  |
| O | 1.960732617  | 13.112175343 | 10.344751920 |
| O | 4.500514510  | 13.114483861 | 7.388841267  |
| O | 4.494588760  | 13.111352378 | 10.343071880 |
| O | 8.444908613  | 13.107437936 | 7.390712473  |
| O | 8.449581853  | 13.103440625 | 10.342644240 |
| O | 10.985327607 | 13.125119185 | 7.386626174  |
| O | 10.984760516 | 13.114131314 | 10.347704470 |
| O | -0.029188301 | 14.431433147 | 2.958744434  |
| O | -0.016749058 | 14.437746119 | 5.910699269  |
| O | -0.025543514 | 14.435563689 | 8.870562665  |
| O | -0.018639448 | 14.413760113 | 0.008805244  |

|   |              |              |              |
|---|--------------|--------------|--------------|
| O | 6.472420093  | 14.423674629 | 2.963836249  |
| O | 6.472148887  | 14.428831020 | 5.915090298  |
| O | 6.472443603  | 14.424520811 | 8.862259351  |
| O | 6.473507255  | 14.388826483 | -0.001638991 |
| O | 9.709661580  | 15.122610654 | 8.878743898  |
| O | 3.236652705  | 15.129375471 | 8.862826935  |
| O | 9.699515119  | 15.120300351 | 5.916030397  |
| O | 9.704615431  | 15.120501806 | 2.955483368  |
| O | 3.235974819  | 15.123515059 | 2.955207265  |
| O | 9.714292996  | 15.119255571 | -0.002743639 |
| O | 3.217270298  | 15.117358894 | -0.004788977 |
| O | 3.236610361  | 15.136053490 | 5.914208520  |
| O | 1.258849168  | 16.485997108 | 10.351967858 |
| O | 5.195276460  | 16.491208863 | 4.436591875  |
| O | 5.194956416  | 16.503587988 | 7.389196865  |
| O | 7.746573964  | 16.472655714 | 1.457189647  |
| O | 7.742980742  | 16.487286206 | 4.433268467  |
| O | 5.191511786  | 16.469769263 | 10.369343174 |
| O | 11.676657266 | 16.468124047 | 1.467054232  |
| O | 11.671542277 | 16.464360696 | 4.446450545  |
| O | 1.262581500  | 16.456146761 | 4.422903017  |
| O | 1.260699422  | 16.482543440 | 1.482367294  |

|   |              |              |              |
|---|--------------|--------------|--------------|
| O | 5.191216811  | 16.473010403 | 1.458116496  |
| O | 7.744981147  | 16.486270715 | 7.396195019  |
| O | 7.750270187  | 16.478192512 | 10.370160600 |
| O | 1.264994299  | 16.463446291 | 7.404892851  |
| O | 11.678193711 | 16.470259328 | 7.388960746  |
| O | 11.682560936 | 16.488592806 | 10.360084147 |
| O | 3.234536569  | 17.760670845 | 8.868330301  |
| O | 3.235937022  | 17.747968821 | -0.007547640 |
| O | 9.697719158  | 17.755414084 | 2.955885575  |
| O | 9.697510428  | 17.746277170 | 5.919089768  |
| O | 3.244849677  | 17.752886252 | 2.956032498  |
| O | 3.196137520  | 17.788980276 | 5.894771659  |
| O | 9.712944499  | 17.754823649 | 8.872748420  |
| O | 9.719537484  | 17.757949774 | 0.007417632  |
| O | 6.472959518  | 18.639458692 | -0.001390451 |
| O | 6.489958350  | 18.717253903 | 5.911114725  |
| O | -0.009663537 | 18.564564933 | 0.010420695  |
| O | 6.466673458  | 18.475081759 | 2.847687794  |
| O | 0.027305705  | 18.497406118 | 5.922683482  |
| O | 6.467085073  | 18.470021809 | 8.978253665  |
| O | -0.029516139 | 18.525372289 | 8.866256927  |
| O | -0.084359009 | 18.487071190 | 2.956841643  |



|   |              |              |              |
|---|--------------|--------------|--------------|
| O | 2.019570842  | 20.160345818 | 4.326874228  |
| O | 4.472357909  | 20.008748420 | 1.433028044  |
| O | 4.487087208  | 19.951630209 | 4.450357862  |
| O | 1.997320897  | 19.980507213 | 7.391810497  |
| O | 1.992983807  | 19.962680231 | 10.334691555 |
| O | 4.477117655  | 19.963045993 | 7.345385705  |
| O | 4.459351704  | 19.989479820 | 10.345309331 |
| O | 8.493723770  | 20.000913463 | 1.464241626  |
| O | 8.449963984  | 19.982000981 | 4.447247860  |
| O | 10.964115857 | 19.983767641 | 1.523548971  |
| O | 10.895472777 | 19.969393612 | 4.454936390  |
| O | 8.445697423  | 19.966836133 | 7.410230840  |
| O | 8.501450288  | 19.989393022 | 10.367788055 |
| O | 10.927677338 | 19.961684386 | 7.379661616  |
| O | 10.966253944 | 19.957712436 | 10.354397303 |
| O | 2.015747199  | 19.915971600 | 1.490077709  |
| O | 6.468509295  | 21.083151943 | 3.032551556  |
| O | 0.183338990  | 21.064344831 | 3.101500380  |
| O | -0.016214698 | 21.102856315 | 5.898121447  |
| O | -0.032171050 | 21.126469414 | 8.871560137  |
| O | -0.008772895 | 21.156886263 | 0.056043440  |
| O | 6.464095441  | 21.076399270 | 8.782902727  |

|   |              |              |              |
|---|--------------|--------------|--------------|
| O | 6.483936482  | 21.287785945 | -0.008703746 |
| H | 0.000000000  | 0.932899949  | 9.814800036  |
| H | 0.816399984  | 0.932899949  | 8.400899982  |
| H | 6.457700016  | 0.932899949  | 6.856699960  |
| H | 0.834099951  | 0.932899949  | -0.439200043 |
| H | 0.000000000  | 0.932899949  | 3.900000036  |
| H | 0.816399984  | 0.932899949  | 2.486099982  |
| H | 6.457700016  | 0.932899949  | 0.941899960  |
| H | 0.834099951  | 0.932899949  | 5.475599957  |
| H | 6.494400000  | 0.932899949  | 9.814800036  |
| H | 7.310799984  | 0.932899949  | 8.400899982  |
| H | -0.036699984 | 0.932899949  | 6.856699960  |
| H | 7.328499951  | 0.932899949  | -0.439200043 |
| H | 6.494400000  | 0.932899949  | 3.900000036  |
| H | 7.310799984  | 0.932899949  | 2.486099982  |
| H | -0.036699984 | 0.932899949  | 0.941899960  |
| H | 7.328499951  | 0.932899949  | 5.475599957  |
| H | 1.337466478  | 20.868440903 | 3.758825944  |
| H | 12.423678094 | 21.902952047 | 5.848523128  |

5-b:

|    |             |             |             |
|----|-------------|-------------|-------------|
| Ti | 3.247200000 | 3.247194072 | 1.478700000 |
| Ti | 3.247200000 | 3.247194072 | 4.436100000 |

|    |             |             |              |
|----|-------------|-------------|--------------|
| Ti | 0.000000000 | 3.247194072 | 2.957400000  |
| Ti | 0.000000000 | 3.247194072 | 0.000000000  |
| Ti | 3.247200000 | 3.247194072 | 7.393500000  |
| Ti | 3.247200000 | 3.247194072 | 10.350900000 |
| Ti | 0.000000000 | 3.247194072 | 8.872200000  |
| Ti | 0.000000000 | 3.247194072 | 5.914800000  |
| Ti | 9.741600000 | 3.247194072 | 1.478700000  |
| Ti | 9.741600000 | 3.247194072 | 4.436100000  |
| Ti | 6.494400000 | 3.247194072 | 2.957400000  |
| Ti | 6.494400000 | 3.247194072 | 0.000000000  |
| Ti | 9.741600000 | 3.247194072 | 7.393500000  |
| Ti | 9.741600000 | 3.247194072 | 10.350900000 |
| Ti | 6.494400000 | 3.247194072 | 8.872200000  |
| Ti | 6.494400000 | 3.247194072 | 5.914800000  |
| Ti | 0.000000000 | 6.494391717 | 4.436100000  |
| Ti | 0.000000000 | 6.494391717 | 1.478700000  |
| Ti | 3.247200000 | 6.494391717 | 2.957400000  |
| Ti | 3.247200000 | 6.494391717 | 0.000000000  |
| Ti | 0.000000000 | 6.494391717 | 10.350900000 |
| Ti | 0.000000000 | 6.494391717 | 7.393500000  |
| Ti | 3.247200000 | 6.494391717 | 8.872200000  |
| Ti | 3.247200000 | 6.494391717 | 5.914800000  |

|    |              |             |              |
|----|--------------|-------------|--------------|
| Ti | 6.494400000  | 6.494391717 | 4.436100000  |
| Ti | 6.494400000  | 6.494391717 | 1.478700000  |
| Ti | 9.741600000  | 6.494391717 | 2.957400000  |
| Ti | 9.741600000  | 6.494391717 | 0.000000000  |
| Ti | 6.494400000  | 6.494391717 | 10.350900000 |
| Ti | 6.494400000  | 6.494391717 | 7.393500000  |
| Ti | 9.741600000  | 6.494391717 | 8.872200000  |
| Ti | 9.741600000  | 6.494391717 | 5.914800000  |
| Ti | 3.233184176  | 9.739003664 | 1.479576928  |
| Ti | 3.232220147  | 9.748099501 | 4.436486236  |
| Ti | -0.006036545 | 9.819864635 | 2.959571205  |
| Ti | -0.009139959 | 9.783043730 | -0.004150533 |
| Ti | 3.232387702  | 9.741052147 | 7.391043702  |
| Ti | 3.233133000  | 9.739334422 | 10.349975517 |
| Ti | -0.009378953 | 9.857565655 | 8.869136370  |
| Ti | -0.019558015 | 9.767288448 | 5.917365249  |
| Ti | 9.741891209  | 9.742565917 | 1.480416593  |
| Ti | 9.729244014  | 9.745000166 | 4.436112658  |
| Ti | 6.483589941  | 9.762236714 | 2.951479285  |
| Ti | 6.489456203  | 9.772523421 | 0.000161001  |
| Ti | 9.728128406  | 9.742111572 | 7.392104580  |
| Ti | 9.737915077  | 9.739909855 | 10.349263257 |

|    |              |              |              |
|----|--------------|--------------|--------------|
| Ti | 6.481779303  | 9.762790358  | 8.877688343  |
| Ti | 6.479814747  | 9.739070816  | 5.913871258  |
| Ti | -0.029639792 | 13.107629389 | 1.450144765  |
| Ti | -0.031187538 | 13.098325311 | 4.490510482  |
| Ti | 3.214074663  | 13.001323650 | 2.954709121  |
| Ti | 3.222086545  | 13.008419582 | 5.912036132  |
| Ti | 6.463954642  | 13.145996568 | 1.426615336  |
| Ti | 6.466909594  | 13.017888325 | 4.403618403  |
| Ti | 9.715062193  | 13.002102324 | 2.951709134  |
| Ti | 9.709342445  | 13.006592199 | 5.911206877  |
| Ti | -0.026259197 | 13.179188425 | 7.411367664  |
| Ti | -0.027701863 | 13.198319865 | 10.377528430 |
| Ti | 3.216402256  | 12.995426805 | 8.869278089  |
| Ti | 3.218915719  | 12.996775911 | -0.003902348 |
| Ti | 6.466454337  | 13.019236002 | 7.424122221  |
| Ti | 6.467880377  | 13.146527352 | 10.400294613 |
| Ti | 9.720956900  | 12.998255033 | 8.866067535  |
| Ti | 9.712019826  | 12.999871674 | -0.005598950 |
| Ti | 9.718603200  | 16.326581898 | 1.476083884  |
| Ti | 9.711552230  | 16.325120277 | 4.434022367  |
| Ti | 6.476601577  | 16.345686548 | 2.930870229  |
| Ti | -0.019908973 | 16.578589975 | 5.908625304  |

|    |              |              |              |
|----|--------------|--------------|--------------|
| Ti | 3.218783753  | 16.322414565 | 1.471821324  |
| Ti | 3.227746804  | 16.325048482 | 4.433182821  |
| Ti | -0.027314537 | 16.354166947 | 2.948612145  |
| Ti | 6.459001234  | 16.279233183 | 5.915909735  |
| Ti | 3.222156295  | 16.320136052 | 7.400457698  |
| Ti | 3.217273155  | 16.327221267 | 10.351530163 |
| Ti | -0.032272232 | 16.556887484 | 8.873905828  |
| Ti | 6.462676025  | 16.787487752 | -0.000569122 |
| Ti | 9.710977215  | 16.325392456 | 7.395621875  |
| Ti | 9.715739689  | 16.327155187 | 10.354967253 |
| Ti | 6.474879262  | 16.348841962 | 8.898675473  |
| Ti | -0.023820680 | 16.702004746 | 0.002516747  |
| Ti | 6.506971989  | 19.624056855 | 7.612495233  |
| Ti | 6.482572918  | 20.142722076 | 10.378568606 |
| Ti | 3.221746888  | 19.580442559 | 8.895135465  |
| Ti | 3.209959552  | 19.577248569 | -0.021516268 |
| Ti | 6.502780374  | 20.148788587 | 1.449834475  |
| Ti | 6.476065659  | 19.633152335 | 4.228400615  |
| Ti | 3.319693220  | 19.585766115 | 2.883849580  |
| Ti | 3.353760245  | 19.564501538 | 5.985913640  |
| Ti | -0.008277502 | 20.049506270 | 1.515399678  |
| Ti | -0.180654725 | 19.745721039 | 4.345776627  |

|    |              |              |              |
|----|--------------|--------------|--------------|
| Ti | 9.681278714  | 19.579017372 | 2.936955139  |
| Ti | 9.664718643  | 19.563924320 | 5.936689255  |
| Ti | 0.002037034  | 19.892607819 | 7.492234573  |
| Ti | -0.024868876 | 20.056791512 | 10.393949334 |
| Ti | 9.736774011  | 19.582812513 | 8.880287661  |
| Ti | 9.735948833  | 19.581677364 | -0.004950806 |
| O  | 0.000000000  | 1.266694833  | 2.957400000  |
| O  | 0.000000000  | 1.266694833  | 0.000000000  |
| O  | 0.000000000  | 1.266694833  | 8.872200000  |
| O  | 0.000000000  | 1.266694833  | 5.914800000  |
| O  | 6.494400000  | 1.266694833  | 2.957400000  |
| O  | 6.494400000  | 1.266694833  | 0.000000000  |
| O  | 6.494400000  | 1.266694833  | 8.872200000  |
| O  | 6.494400000  | 1.266694833  | 5.914800000  |
| O  | 9.741600000  | 1.980495667  | 8.872200000  |
| O  | 9.741600000  | 1.980495667  | 5.914800000  |
| O  | 9.741600000  | 1.980495667  | 2.957400000  |
| O  | 9.741600000  | 1.980495667  | 0.000000000  |
| O  | 3.247200000  | 1.980495667  | 8.872200000  |
| O  | 3.247200000  | 1.980495667  | 5.914800000  |
| O  | 3.247200000  | 1.980495667  | 2.957400000  |
| O  | 3.247200000  | 1.980495667  | 0.000000000  |

|   |              |             |              |
|---|--------------|-------------|--------------|
| O | 1.266698949  | 3.247194072 | 1.478700000  |
| O | 1.266698949  | 3.247194072 | 4.436100000  |
| O | 5.227599738  | 3.247194072 | 1.478700000  |
| O | 5.227599738  | 3.247194072 | 4.436100000  |
| O | 1.266698949  | 3.247194072 | 7.393500000  |
| O | 1.266698949  | 3.247194072 | 10.350900000 |
| O | 5.227599738  | 3.247194072 | 7.393500000  |
| O | 5.227599738  | 3.247194072 | 10.350900000 |
| O | 7.761098949  | 3.247194072 | 1.478700000  |
| O | 7.761098949  | 3.247194072 | 4.436100000  |
| O | 11.721999738 | 3.247194072 | 1.478700000  |
| O | 11.721999738 | 3.247194072 | 4.436100000  |
| O | 7.761098949  | 3.247194072 | 7.393500000  |
| O | 7.761098949  | 3.247194072 | 10.350900000 |
| O | 11.721999738 | 3.247194072 | 7.393500000  |
| O | 11.721999738 | 3.247194072 | 10.350900000 |
| O | 9.741600000  | 4.513896049 | 8.872200000  |
| O | 9.741600000  | 4.513896049 | 5.914800000  |
| O | 9.741600000  | 4.513896049 | 2.957400000  |
| O | 9.741600000  | 4.513896049 | 0.000000000  |
| O | 3.247200000  | 4.513896049 | 8.872200000  |
| O | 3.247200000  | 4.513896049 | 5.914800000  |



|   |              |             |              |
|---|--------------|-------------|--------------|
| O | 3.247200000  | 4.513896049 | 2.957400000  |
| O | 3.247200000  | 4.513896049 | 0.000000000  |
| O | 0.000000000  | 5.227596870 | 2.957400000  |
| O | 0.000000000  | 5.227596870 | 0.000000000  |
| O | 0.000000000  | 5.227596870 | 8.872200000  |
| O | 0.000000000  | 5.227596870 | 5.914800000  |
| O | 6.494400000  | 5.227596870 | 0.000000000  |
| O | 6.494400000  | 5.227596870 | 2.957400000  |
| O | 6.494400000  | 5.227596870 | 8.872200000  |
| O | 6.494400000  | 5.227596870 | 5.914800000  |
| O | 8.474899752  | 6.494391717 | 7.393500000  |
| O | 11.008298949 | 6.494391717 | 7.393500000  |
| O | 8.474899752  | 6.494391717 | 10.350900000 |
| O | 11.008298949 | 6.494391717 | 10.350900000 |
| O | 8.474899752  | 6.494391717 | 1.478700000  |
| O | 11.008298949 | 6.494391717 | 1.478700000  |
| O | 8.474899752  | 6.494391717 | 4.436100000  |
| O | 11.008298949 | 6.494391717 | 4.436100000  |
| O | 1.980499752  | 6.494391717 | 1.478700000  |
| O | 4.513898949  | 6.494391717 | 1.478700000  |
| O | 1.980499752  | 6.494391717 | 4.436100000  |
| O | 4.513898949  | 6.494391717 | 4.436100000  |

|   |             |             |              |
|---|-------------|-------------|--------------|
| O | 1.980499752 | 6.494391717 | 7.393500000  |
| O | 4.513898949 | 6.494391717 | 7.393500000  |
| O | 1.980499752 | 6.494391717 | 10.350900000 |
| O | 4.513898949 | 6.494391717 | 10.350900000 |
| O | 0.000000000 | 7.761086550 | 8.872200000  |
| O | 0.000000000 | 7.761086550 | 5.914800000  |
| O | 6.494400000 | 7.761086550 | 2.957400000  |
| O | 6.494400000 | 7.761086550 | 0.000000000  |
| O | 0.000000000 | 7.761086550 | 2.957400000  |
| O | 0.000000000 | 7.761086550 | 0.000000000  |
| O | 6.494400000 | 7.761086550 | 8.872200000  |
| O | 6.494400000 | 7.761086550 | 5.914800000  |
| O | 3.247200000 | 8.474887384 | 2.957400000  |
| O | 3.247200000 | 8.474887384 | 0.000000000  |
| O | 3.247200000 | 8.474887384 | 8.872200000  |
| O | 3.247200000 | 8.474887384 | 5.914800000  |
| O | 9.741600000 | 8.474887384 | 2.957400000  |
| O | 9.741600000 | 8.474887384 | 0.000000000  |
| O | 9.741600000 | 8.474887384 | 8.872200000  |
| O | 9.741600000 | 8.474887384 | 5.914800000  |
| O | 1.268418017 | 9.788710188 | 1.476418425  |
| O | 1.266486582 | 9.786102703 | 4.440302820  |

|   |              |              |              |
|---|--------------|--------------|--------------|
| O | 5.211981615  | 9.780955956  | 1.477805801  |
| O | 5.210838471  | 9.778450985  | 4.436456662  |
| O | 1.266119519  | 9.788679113  | 7.388161183  |
| O | 1.267879371  | 9.792005621  | 10.351963599 |
| O | 5.210275796  | 9.779499694  | 7.392351582  |
| O | 5.211610525  | 9.780907021  | 10.352252123 |
| O | 7.761356127  | 9.784368547  | 1.479275392  |
| O | 7.758737585  | 9.782477585  | 4.437487849  |
| O | 11.705755945 | 9.785121860  | 1.477929538  |
| O | 11.703817886 | 9.782923000  | 4.435938053  |
| O | 7.758528466  | 9.782639034  | 7.392144801  |
| O | 7.760889959  | 9.784878257  | 10.350127527 |
| O | 11.702918412 | 9.783955279  | 7.391070318  |
| O | 11.704727752 | 9.789731037  | 10.351545305 |
| O | 9.726591571  | 11.075431222 | 2.958474009  |
| O | 9.726992276  | 11.076527080 | -0.000606504 |
| O | 3.237116015  | 11.075008309 | 2.958191045  |
| O | 3.238224350  | 11.075258342 | 0.000010292  |
| O | 3.237404756  | 11.073487395 | 8.870172052  |
| O | 3.237457101  | 11.078570205 | 5.914281272  |
| O | 9.727091640  | 11.075036170 | 8.868992286  |
| O | 9.726695872  | 11.078460548 | 5.914489236  |

|   |              |              |              |
|---|--------------|--------------|--------------|
| O | 6.472561411  | 11.800293150 | 8.869827455  |
| O | -0.021247339 | 11.808523516 | 2.960987444  |
| O | 6.473720272  | 11.806309297 | -0.000778388 |
| O | 6.471879629  | 11.802947070 | 5.913490108  |
| O | -0.022060568 | 11.811587490 | -0.001234064 |
| O | -0.024045776 | 11.815409063 | 5.915661905  |
| O | 6.473015629  | 11.800105268 | 2.957338249  |
| O | -0.020939764 | 11.817305026 | 8.859990433  |
| O | 8.445288146  | 13.106097403 | 1.479309224  |
| O | 8.439884805  | 13.108201250 | 4.436972788  |
| O | 10.979277424 | 13.113880210 | 1.481585003  |
| O | 10.978659417 | 13.121646944 | 4.432445482  |
| O | 1.958060041  | 13.108539152 | 1.481413000  |
| O | 1.958028998  | 13.114825691 | 4.433558410  |
| O | 4.492996463  | 13.111127706 | 1.481360595  |
| O | 4.498618405  | 13.114394563 | 4.436650550  |
| O | 1.959408798  | 13.118501888 | 7.391439284  |
| O | 1.958610377  | 13.108488074 | 10.347174622 |
| O | 4.497721139  | 13.112096404 | 7.390669768  |
| O | 4.493079331  | 13.110046492 | 10.346067254 |
| O | 8.440938846  | 13.106578537 | 7.390373082  |
| O | 8.446643007  | 13.106129550 | 10.344361425 |

|   |              |              |              |
|---|--------------|--------------|--------------|
| O | 10.979889976 | 13.125381720 | 7.390254549  |
| O | 10.980330556 | 13.115135375 | 10.346250376 |
| O | -0.025435447 | 14.437096391 | 2.954067602  |
| O | -0.022462831 | 14.424455446 | 5.908497544  |
| O | -0.025890575 | 14.448476099 | 8.872563760  |
| O | -0.023982520 | 14.406341282 | 0.007633877  |
| O | 6.471845209  | 14.423594976 | 2.964954856  |
| O | 6.468588267  | 14.422819517 | 5.915417978  |
| O | 6.471252919  | 14.423262432 | 8.862665461  |
| O | 6.469094181  | 14.391026058 | -0.000736866 |
| O | 9.704542174  | 15.124676997 | 8.874875856  |
| O | 3.230554203  | 15.121160464 | 8.875487446  |
| O | 9.700045971  | 15.121350489 | 5.914519402  |
| O | 9.701311990  | 15.121705893 | 2.954582662  |
| O | 3.232487197  | 15.124557339 | 2.953718983  |
| O | 9.720561002  | 15.120952223 | -0.001561625 |
| O | 3.216162873  | 15.119384517 | -0.001213954 |
| O | 3.235075345  | 15.123520060 | 5.913027453  |
| O | 1.257454171  | 16.487844493 | 10.351235961 |
| O | 5.193923027  | 16.486639335 | 4.432256090  |
| O | 5.192264098  | 16.490585567 | 7.396440010  |
| O | 7.746172480  | 16.473164709 | 1.457345088  |

|   |              |              |              |
|---|--------------|--------------|--------------|
| O | 7.740760437  | 16.491202077 | 4.439201958  |
| O | 5.188930262  | 16.475339280 | 10.370131144 |
| O | 11.678607664 | 16.484612283 | 1.471472351  |
| O | 11.673779987 | 16.467534327 | 4.435759544  |
| O | 1.266603222  | 16.463602740 | 4.428678109  |
| O | 1.259892948  | 16.485862804 | 1.476770947  |
| O | 5.188062870  | 16.479645560 | 1.463164068  |
| O | 7.741556001  | 16.491979679 | 7.391034475  |
| O | 7.748136906  | 16.470775824 | 10.373763186 |
| O | 1.264487476  | 16.468305143 | 7.389416659  |
| O | 11.676867815 | 16.473034335 | 7.384280956  |
| O | 11.680030198 | 16.494511797 | 10.354486971 |
| O | 3.232232356  | 17.753981039 | 8.869878323  |
| O | 3.224947718  | 17.751758247 | -0.000798380 |
| O | 9.699539668  | 17.755579820 | 2.956749372  |
| O | 9.706662726  | 17.747779511 | 5.914696018  |
| O | 3.232571624  | 17.772725999 | 2.963690272  |
| O | 3.235161590  | 17.759149217 | 5.906277246  |
| O | 9.711877729  | 17.757992994 | 8.868984005  |
| O | 9.709758346  | 17.755466234 | 0.000944357  |
| O | 6.481155321  | 18.640899953 | 0.004098956  |
| O | 6.443041505  | 18.745034692 | 5.916843800  |

|   |              |              |              |
|---|--------------|--------------|--------------|
| O | -0.012382093 | 18.566547336 | -0.006652139 |
| O | 6.469687639  | 18.479561990 | 2.855269030  |
| O | 0.005596874  | 18.515327399 | 5.893393511  |
| O | 6.488833910  | 18.470825129 | 8.987053350  |
| O | -0.020452814 | 18.520530939 | 8.845122164  |
| O | -0.036170041 | 18.515416696 | 2.965574135  |
| O | 2.001427826  | 20.155138706 | 4.455433470  |
| O | 4.477655002  | 19.989245146 | 1.447700533  |
| O | 4.462896867  | 19.998288119 | 4.436730754  |
| O | 2.025884308  | 19.950281817 | 7.367097752  |
| O | 1.986850236  | 19.969132863 | 10.343742855 |
| O | 4.512404458  | 19.982632492 | 7.416952064  |
| O | 4.463291077  | 19.981263384 | 10.359053552 |
| O | 8.491818184  | 20.007265011 | 1.466975683  |
| O | 8.446324392  | 19.968427056 | 4.447313751  |
| O | 10.949659713 | 19.954453079 | 1.495686832  |
| O | 10.896716844 | 19.990941440 | 4.448227706  |
| O | 8.464018515  | 19.976873879 | 7.397022500  |
| O | 8.501919184  | 19.997533734 | 10.353428577 |
| O | 10.947805042 | 19.967127957 | 7.368766199  |
| O | 10.963805165 | 19.961601875 | 10.348182504 |
| O | 2.010993168  | 19.971030255 | 1.499738352  |

|   |              |              |              |
|---|--------------|--------------|--------------|
| O | 6.464778912  | 21.090690789 | 3.033382112  |
| O | -0.016016230 | 21.096435472 | 3.029438242  |
| O | 0.031202864  | 21.157400974 | 5.897329574  |
| O | -0.015677741 | 21.123122903 | 8.846847156  |
| O | -0.016477072 | 21.172643332 | 0.022456485  |
| O | 6.479107117  | 21.084915388 | 8.795905823  |
| O | 6.480670838  | 21.289846930 | -0.000635131 |
| H | 0.000000000  | 0.932897449  | 9.814799089  |
| H | 0.816399334  | 0.932897449  | 8.400899272  |
| H | 6.457698847  | 0.932897449  | 6.856699960  |
| H | 0.834099172  | 0.932897449  | -0.439201108 |
| H | 0.000000000  | 0.932897449  | 3.899999089  |
| H | 0.816399334  | 0.932897449  | 2.486099272  |
| H | 6.457698847  | 0.932897449  | 0.941899960  |
| H | 0.834099172  | 0.932897449  | 5.475598892  |
| H | 6.494400000  | 0.932897449  | 9.814799089  |
| H | 7.310799334  | 0.932897449  | 8.400899272  |
| H | -0.036701153 | 0.932897449  | 6.856699960  |
| H | 7.328499172  | 0.932897449  | -0.439201108 |
| H | 6.494400000  | 0.932897449  | 3.899999089  |
| H | 7.310799334  | 0.932897449  | 2.486099272  |
| H | -0.036701153 | 0.932897449  | 0.941899960  |



|   |              |              |             |
|---|--------------|--------------|-------------|
| H | 7.328499172  | 0.932897449  | 5.475598892 |
| H | 1.815857230  | 21.118999862 | 4.497733636 |
| H | -0.567070096 | 21.925282835 | 5.904896022 |

TS5-2:

|    |             |             |              |
|----|-------------|-------------|--------------|
| Ti | 3.247200000 | 3.247190143 | 1.478700000  |
| Ti | 3.247200000 | 3.247190143 | 4.436100000  |
| Ti | 0.000000000 | 3.247190143 | 2.957400000  |
| Ti | 0.000000000 | 3.247190143 | 0.000000000  |
| Ti | 3.247200000 | 3.247190143 | 7.393500000  |
| Ti | 3.247200000 | 3.247190143 | 10.350900000 |
| Ti | 0.000000000 | 3.247190143 | 8.872200000  |
| Ti | 0.000000000 | 3.247190143 | 5.914800000  |
| Ti | 9.741600000 | 3.247190143 | 1.478700000  |
| Ti | 9.741600000 | 3.247190143 | 4.436100000  |
| Ti | 6.494400000 | 3.247190143 | 2.957400000  |
| Ti | 6.494400000 | 3.247190143 | 0.000000000  |
| Ti | 9.741600000 | 3.247190143 | 7.393500000  |
| Ti | 9.741600000 | 3.247190143 | 10.350900000 |
| Ti | 6.494400000 | 3.247190143 | 8.872200000  |
| Ti | 6.494400000 | 3.247190143 | 5.914800000  |
| Ti | 0.000000000 | 6.494389931 | 4.436100000  |
| Ti | 0.000000000 | 6.494389931 | 1.478700000  |

|    |              |             |              |
|----|--------------|-------------|--------------|
| Ti | 3.247200000  | 6.494389931 | 2.957400000  |
| Ti | 3.247200000  | 6.494389931 | 0.000000000  |
| Ti | 0.000000000  | 6.494389931 | 10.350900000 |
| Ti | 0.000000000  | 6.494389931 | 7.393500000  |
| Ti | 3.247200000  | 6.494389931 | 8.872200000  |
| Ti | 3.247200000  | 6.494389931 | 5.914800000  |
| Ti | 6.494400000  | 6.494389931 | 4.436100000  |
| Ti | 6.494400000  | 6.494389931 | 1.478700000  |
| Ti | 9.741600000  | 6.494389931 | 2.957400000  |
| Ti | 9.741600000  | 6.494389931 | 0.000000000  |
| Ti | 6.494400000  | 6.494389931 | 10.350900000 |
| Ti | 6.494400000  | 6.494389931 | 7.393500000  |
| Ti | 9.741600000  | 6.494389931 | 8.872200000  |
| Ti | 9.741600000  | 6.494389931 | 5.914800000  |
| Ti | 3.234353168  | 9.736565487 | 1.484667205  |
| Ti | 3.230779819  | 9.749663992 | 4.438506496  |
| Ti | -0.008114233 | 9.839048939 | 2.957682609  |
| Ti | -0.004953279 | 9.801517584 | -0.000752244 |
| Ti | 3.229900347  | 9.750356583 | 7.391894014  |
| Ti | 3.230910486  | 9.736548342 | 10.345400419 |
| Ti | -0.012073609 | 9.835773152 | 8.868613620  |
| Ti | -0.014471342 | 9.800957510 | 5.913664832  |

|    |              |              |              |
|----|--------------|--------------|--------------|
| Ti | 9.742734572  | 9.739280843  | 1.478521610  |
| Ti | 9.733206118  | 9.740614590  | 4.436132650  |
| Ti | 6.483847249  | 9.763393294  | 2.950483706  |
| Ti | 6.490413867  | 9.774855156  | -0.001743801 |
| Ti | 9.729864749  | 9.738516815  | 7.394233317  |
| Ti | 9.741837435  | 9.742755585  | 10.351231820 |
| Ti | 6.481095182  | 9.761965607  | 8.876260747  |
| Ti | 6.480549133  | 9.738641831  | 5.912757974  |
| Ti | -0.021735848 | 13.172581843 | 1.503476506  |
| Ti | -0.023269695 | 13.167672270 | 4.467526752  |
| Ti | 3.220043537  | 13.016708527 | 2.956921019  |
| Ti | 3.231395098  | 13.019427455 | 5.913035260  |
| Ti | 6.470480995  | 13.147040634 | 1.428099004  |
| Ti | 6.472992120  | 13.019398523 | 4.401848931  |
| Ti | 9.719370188  | 12.996901641 | 2.947176741  |
| Ti | 9.717991427  | 12.998963341 | 5.904907970  |
| Ti | -0.023981741 | 13.142053908 | 7.398366579  |
| Ti | -0.021870541 | 13.142177496 | 10.405414227 |
| Ti | 3.220830268  | 13.016956417 | 8.866661854  |
| Ti | 3.224635727  | 12.986380975 | -0.003435789 |
| Ti | 6.474982783  | 13.016720671 | 7.423483896  |
| Ti | 6.470847019  | 13.144957503 | 10.399440398 |

|    |              |              |              |
|----|--------------|--------------|--------------|
| Ti | 9.720410202  | 12.998603293 | 8.863690259  |
| Ti | 9.719463967  | 12.999036565 | -0.009450194 |
| Ti | 9.727828495  | 16.320792924 | 1.473653493  |
| Ti | 9.714469254  | 16.320613972 | 4.432103133  |
| Ti | 6.473899517  | 16.354865967 | 2.930574608  |
| Ti | -0.021672982 | 16.624575654 | 5.910758654  |
| Ti | 3.217776341  | 16.292961771 | 1.491149589  |
| Ti | 3.220017949  | 16.370260131 | 4.464856693  |
| Ti | -0.030917890 | 16.557799389 | 2.953794575  |
| Ti | 6.460405063  | 16.277224705 | 5.912787548  |
| Ti | 3.216617221  | 16.375316866 | 7.358029063  |
| Ti | 3.225921878  | 16.298857187 | 10.339843346 |
| Ti | -0.032172608 | 16.443534034 | 8.873455121  |
| Ti | 6.469561907  | 16.782783563 | 0.002427789  |
| Ti | 9.712426636  | 16.325093488 | 7.392402686  |
| Ti | 9.714710976  | 16.319961029 | 10.353078776 |
| Ti | 6.472470749  | 16.350056765 | 8.894318040  |
| Ti | -0.018141587 | 16.651633849 | -0.005424936 |
| Ti | 6.523874575  | 19.632090053 | 7.623498063  |
| Ti | 6.477296218  | 20.140230678 | 10.385006630 |
| Ti | 3.226121645  | 19.570684136 | 8.926669985  |
| Ti | 3.239677147  | 19.549786393 | 0.032207742  |

|    |              |              |              |
|----|--------------|--------------|--------------|
| Ti | 6.479056201  | 20.143361446 | 1.458341258  |
| Ti | 6.458402060  | 19.636738877 | 4.228536537  |
| Ti | 3.243712897  | 19.564096128 | 2.948444165  |
| Ti | 3.406644274  | 19.656724715 | 6.023767059  |
| Ti | -0.020577506 | 20.015557528 | 1.452898341  |
| Ti | -0.007150594 | 19.875545222 | 4.333091155  |
| Ti | 9.707214750  | 19.574095655 | 2.957182454  |
| Ti | 9.713785524  | 19.563124215 | 5.906736826  |
| Ti | 0.018138729  | 19.824354932 | 7.505580492  |
| Ti | -0.019288498 | 19.999170734 | 10.359813367 |
| Ti | 9.735982993  | 19.575949470 | 8.869480493  |
| Ti | 9.713009833  | 19.567683027 | -0.002732164 |
| O  | 0.000000000  | 1.266689833  | 2.957400000  |
| O  | 0.000000000  | 1.266689833  | 0.000000000  |
| O  | 0.000000000  | 1.266689833  | 8.872200000  |
| O  | 0.000000000  | 1.266689833  | 5.914800000  |
| O  | 6.494400000  | 1.266689833  | 2.957400000  |
| O  | 6.494400000  | 1.266689833  | 0.000000000  |
| O  | 6.494400000  | 1.266689833  | 8.872200000  |
| O  | 6.494400000  | 1.266689833  | 5.914800000  |
| O  | 9.741600000  | 1.980499953  | 8.872200000  |
| O  | 9.741600000  | 1.980499953  | 5.914800000  |

|   |              |             |              |
|---|--------------|-------------|--------------|
| O | 9.741600000  | 1.980499953 | 2.957400000  |
| O | 9.741600000  | 1.980499953 | 0.000000000  |
| O | 3.247200000  | 1.980499953 | 8.872200000  |
| O | 3.247200000  | 1.980499953 | 5.914800000  |
| O | 3.247200000  | 1.980499953 | 2.957400000  |
| O | 3.247200000  | 1.980499953 | 0.000000000  |
| O | 1.266699988  | 3.247190143 | 1.478700000  |
| O | 1.266699988  | 3.247190143 | 4.436100000  |
| O | 5.227599998  | 3.247190143 | 1.478700000  |
| O | 5.227599998  | 3.247190143 | 4.436100000  |
| O | 1.266699988  | 3.247190143 | 7.393500000  |
| O | 1.266699988  | 3.247190143 | 10.350900000 |
| O | 5.227599998  | 3.247190143 | 7.393500000  |
| O | 5.227599998  | 3.247190143 | 10.350900000 |
| O | 7.761099988  | 3.247190143 | 1.478700000  |
| O | 7.761099988  | 3.247190143 | 4.436100000  |
| O | 11.721999998 | 3.247190143 | 1.478700000  |
| O | 11.721999998 | 3.247190143 | 4.436100000  |
| O | 7.761099988  | 3.247190143 | 7.393500000  |
| O | 7.761099988  | 3.247190143 | 10.350900000 |
| O | 11.721999998 | 3.247190143 | 7.393500000  |
| O | 11.721999998 | 3.247190143 | 10.350900000 |

|   |              |             |              |
|---|--------------|-------------|--------------|
| O | 9.741600000  | 4.513899978 | 8.872200000  |
| O | 9.741600000  | 4.513899978 | 5.914800000  |
| O | 9.741600000  | 4.513899978 | 2.957400000  |
| O | 9.741600000  | 4.513899978 | 0.000000000  |
| O | 3.247200000  | 4.513899978 | 8.872200000  |
| O | 3.247200000  | 4.513899978 | 5.914800000  |
| O | 3.247200000  | 4.513899978 | 2.957400000  |
| O | 3.247200000  | 4.513899978 | 0.000000000  |
| O | 0.000000000  | 5.227600085 | 2.957400000  |
| O | 0.000000000  | 5.227600085 | 0.000000000  |
| O | 0.000000000  | 5.227600085 | 8.872200000  |
| O | 0.000000000  | 5.227600085 | 5.914800000  |
| O | 6.494400000  | 5.227600085 | 0.000000000  |
| O | 6.494400000  | 5.227600085 | 2.957400000  |
| O | 6.494400000  | 5.227600085 | 8.872200000  |
| O | 6.494400000  | 5.227600085 | 5.914800000  |
| O | 8.474900012  | 6.494389931 | 7.393500000  |
| O | 11.008299988 | 6.494389931 | 7.393500000  |
| O | 8.474900012  | 6.494389931 | 10.350900000 |
| O | 11.008299988 | 6.494389931 | 10.350900000 |
| O | 8.474900012  | 6.494389931 | 1.478700000  |
| O | 11.008299988 | 6.494389931 | 1.478700000  |

|   |              |             |              |
|---|--------------|-------------|--------------|
| O | 8.474900012  | 6.494389931 | 4.436100000  |
| O | 11.008299988 | 6.494389931 | 4.436100000  |
| O | 1.980500012  | 6.494389931 | 1.478700000  |
| O | 4.513899988  | 6.494389931 | 1.478700000  |
| O | 1.980500012  | 6.494389931 | 4.436100000  |
| O | 4.513899988  | 6.494389931 | 4.436100000  |
| O | 1.980500012  | 6.494389931 | 7.393500000  |
| O | 4.513899988  | 6.494389931 | 7.393500000  |
| O | 1.980500012  | 6.494389931 | 10.350900000 |
| O | 4.513899988  | 6.494389931 | 10.350900000 |
| O | 0.000000000  | 7.761090122 | 8.872200000  |
| O | 0.000000000  | 7.761090122 | 5.914800000  |
| O | 6.494400000  | 7.761090122 | 2.957400000  |
| O | 6.494400000  | 7.761090122 | 0.000000000  |
| O | 0.000000000  | 7.761090122 | 2.957400000  |
| O | 0.000000000  | 7.761090122 | 0.000000000  |
| O | 6.494400000  | 7.761090122 | 8.872200000  |
| O | 6.494400000  | 7.761090122 | 5.914800000  |
| O | 3.247200000  | 8.474889884 | 2.957400000  |
| O | 3.247200000  | 8.474889884 | 0.000000000  |
| O | 3.247200000  | 8.474889884 | 8.872200000  |
| O | 3.247200000  | 8.474889884 | 5.914800000  |



|   |              |              |              |
|---|--------------|--------------|--------------|
| O | 9.741600000  | 8.474889884  | 2.957400000  |
| O | 9.741600000  | 8.474889884  | 0.000000000  |
| O | 9.741600000  | 8.474889884  | 8.872200000  |
| O | 9.741600000  | 8.474889884  | 5.914800000  |
| O | 1.270931739  | 9.785341532  | 1.475313540  |
| O | 1.268793913  | 9.786434890  | 4.437214230  |
| O | 5.213461429  | 9.779135717  | 1.477013572  |
| O | 5.212422845  | 9.777979851  | 4.436259226  |
| O | 1.268604276  | 9.784336043  | 7.390096742  |
| O | 1.270263985  | 9.785017561  | 10.349212626 |
| O | 5.212269967  | 9.777668382  | 7.391254387  |
| O | 5.212999937  | 9.779269306  | 10.351316993 |
| O | 7.762113245  | 9.782887639  | 1.478938603  |
| O | 7.760061793  | 9.779990115  | 4.436932094  |
| O | 11.705507469 | 9.783963851  | 1.475011649  |
| O | 11.703956736 | 9.783787757  | 4.435488528  |
| O | 7.759247006  | 9.780232290  | 7.390850998  |
| O | 7.761559012  | 9.781910725  | 10.348432227 |
| O | 11.703135195 | 9.781783208  | 7.390591575  |
| O | 11.704899334 | 9.782377929  | 10.349929381 |
| O | 9.728132952  | 11.072090783 | 2.957693847  |
| O | 9.727661459  | 11.073120204 | -0.002381653 |

|   |              |              |              |
|---|--------------|--------------|--------------|
| O | 3.239811971  | 11.075211907 | 2.956864001  |
| O | 3.241519868  | 11.071235671 | -0.001336863 |
| O | 3.239771056  | 11.076061304 | 8.871020944  |
| O | 3.241600528  | 11.078526628 | 5.914484978  |
| O | 9.727894998  | 11.072461189 | 8.868293984  |
| O | 9.726776532  | 11.073911379 | 5.913540266  |
| O | 6.476331021  | 11.797366338 | 8.868758651  |
| O | -0.015145330 | 11.802054096 | 2.952752387  |
| O | 6.477214778  | 11.802325560 | -0.001387967 |
| O | 6.476899930  | 11.801628683 | 5.913147760  |
| O | -0.017785824 | 11.801401510 | -0.009653900 |
| O | -0.018494493 | 11.806272864 | 5.915373972  |
| O | 6.476889669  | 11.797756746 | 2.958196369  |
| O | -0.016487333 | 11.804047214 | 8.862952328  |
| O | 8.448916307  | 13.098834306 | 1.478332218  |
| O | 8.444238650  | 13.102943774 | 4.435230998  |
| O | 10.980565263 | 13.106169912 | 1.475329865  |
| O | 10.980197421 | 13.111904951 | 4.432641735  |
| O | 1.965088411  | 13.103991055 | 1.476152022  |
| O | 1.966157779  | 13.110885888 | 4.436948419  |
| O | 4.498202894  | 13.104577203 | 1.479917857  |
| O | 4.504340621  | 13.105494109 | 4.436409344  |

|   |              |              |              |
|---|--------------|--------------|--------------|
| O | 1.965873714  | 13.112210348 | 7.391415151  |
| O | 1.965319741  | 13.106810353 | 10.344951131 |
| O | 4.505036301  | 13.106759275 | 7.390534438  |
| O | 4.498862984  | 13.105957741 | 10.345314299 |
| O | 8.444415818  | 13.102391916 | 7.387329207  |
| O | 8.448858377  | 13.098643924 | 10.342263446 |
| O | 10.981270036 | 13.114617450 | 7.389984479  |
| O | 10.982095084 | 13.109804675 | 10.342501930 |
| O | -0.029039839 | 14.418000313 | 2.956139911  |
| O | -0.021302411 | 14.405909083 | 5.918354085  |
| O | -0.024908232 | 14.433255529 | 8.871556351  |
| O | -0.019285251 | 14.402492206 | -0.001635324 |
| O | 6.476957081  | 14.419525870 | 2.965387464  |
| O | 6.471868718  | 14.420296686 | 5.914297360  |
| O | 6.477009685  | 14.419815194 | 8.861147132  |
| O | 6.476022537  | 14.385308164 | -0.001394946 |
| O | 9.701918826  | 15.118627274 | 8.868898004  |
| O | 3.238202269  | 15.125080979 | 8.864727597  |
| O | 9.700520322  | 15.118410460 | 5.913563215  |
| O | 9.702861294  | 15.116349833 | 2.954587394  |
| O | 3.236544768  | 15.115426140 | 2.961369422  |
| O | 9.711396494  | 15.110943766 | -0.003042337 |

|   |              |              |              |
|---|--------------|--------------|--------------|
| O | 3.224205538  | 15.108797770 | -0.003728217 |
| O | 3.246354949  | 15.120382148 | 5.918020727  |
| O | 1.260208446  | 16.465064360 | 10.346791817 |
| O | 5.204243408  | 16.482269476 | 4.434644368  |
| O | 5.203575134  | 16.491360669 | 7.396010951  |
| O | 7.749436565  | 16.469105248 | 1.462031975  |
| O | 7.744626293  | 16.490942757 | 4.440638071  |
| O | 5.200016463  | 16.465479772 | 10.367829695 |
| O | 11.674906246 | 16.456653256 | 1.459424258  |
| O | 11.672585537 | 16.457297626 | 4.441561135  |
| O | 1.250043801  | 16.438196548 | 4.425437035  |
| O | 1.257945667  | 16.465887683 | 1.469194088  |
| O | 5.198075417  | 16.461321369 | 1.461557490  |
| O | 7.745272876  | 16.488681031 | 7.388331766  |
| O | 7.749465401  | 16.462077540 | 10.370407484 |
| O | 1.254549355  | 16.452777747 | 7.398232195  |
| O | 11.674972099 | 16.458407415 | 7.385989624  |
| O | 11.676305919 | 16.462736197 | 10.352357880 |
| O | 3.243547549  | 17.741034697 | 8.888270393  |
| O | 3.239997710  | 17.725408360 | 0.008394048  |
| O | 9.708506616  | 17.745748530 | 2.955676309  |
| O | 9.716109350  | 17.740847529 | 5.912679308  |

|   |              |              |              |
|---|--------------|--------------|--------------|
| O | 3.236595034  | 17.729578550 | 2.956645626  |
| O | 3.206740797  | 17.736833431 | 5.899057050  |
| O | 9.712516388  | 17.748986097 | 8.869171859  |
| O | 9.704642967  | 17.740239592 | -0.004518316 |
| O | 6.487949632  | 18.625599373 | 0.007501268  |
| O | 6.424113707  | 18.761776890 | 5.929493191  |
| O | -0.029045425 | 18.525775199 | -0.012088432 |
| O | 6.462629265  | 18.473132218 | 2.857854389  |
| O | -0.005360608 | 18.504982113 | 5.897803112  |
| O | 6.505690385  | 18.467218942 | 8.987101851  |
| O | -0.029606930 | 18.488458158 | 8.859782351  |
| O | -0.045198556 | 18.479101930 | 2.947059983  |
| O | 1.970130403  | 19.990502454 | 4.341991983  |
| O | 4.466699988  | 19.988744009 | 1.458914757  |
| O | 4.484702854  | 20.016297268 | 4.417584073  |
| O | 2.033725127  | 19.869860547 | 7.418821969  |
| O | 2.001660975  | 19.936043877 | 10.368014001 |
| O | 4.533231999  | 20.013858019 | 7.509455395  |
| O | 4.471997600  | 19.968116658 | 10.380809251 |
| O | 8.494834443  | 19.977930804 | 1.473377981  |
| O | 8.454206515  | 19.940843079 | 4.449242922  |
| O | 10.940774594 | 19.921952742 | 1.478252959  |

|   |              |              |              |
|---|--------------|--------------|--------------|
| O | 10.929073504 | 19.958315015 | 4.439192731  |
| O | 8.483345200  | 19.969015705 | 7.383987582  |
| O | 8.506936887  | 19.979326344 | 10.351572631 |
| O | 10.955561693 | 19.946065550 | 7.378758071  |
| O | 10.954003557 | 19.933965033 | 10.345474236 |
| O | 1.985598765  | 19.932733443 | 1.464117889  |
| O | 6.496007104  | 21.090472189 | 3.031696986  |
| O | -0.065741253 | 21.100204895 | 2.958286865  |
| O | 0.045294413  | 21.128280366 | 5.913587348  |
| O | -0.005650907 | 21.084875740 | 8.842177776  |
| O | -0.033105594 | 21.135811712 | -0.011185005 |
| O | 6.514099723  | 21.091380523 | 8.816775958  |
| O | 6.494237380  | 21.283340719 | 0.006015825  |
| H | 0.000000000  | 0.932899949  | 9.814800036  |
| H | 0.816399984  | 0.932899949  | 8.400899982  |
| H | 6.457700016  | 0.932899949  | 6.856699960  |
| H | 0.834099951  | 0.932899949  | -0.439200043 |
| H | 0.000000000  | 0.932899949  | 3.900000036  |
| H | 0.816399984  | 0.932899949  | 2.486099982  |
| H | 6.457700016  | 0.932899949  | 0.941899960  |
| H | 0.834099951  | 0.932899949  | 5.475599957  |
| H | 6.494400000  | 0.932899949  | 9.814800036  |

|   |              |              |              |
|---|--------------|--------------|--------------|
| H | 7.310799984  | 0.932899949  | 8.400899982  |
| H | -0.036699984 | 0.932899949  | 6.856699960  |
| H | 7.328499951  | 0.932899949  | -0.439200043 |
| H | 6.494400000  | 0.932899949  | 3.900000036  |
| H | 7.310799984  | 0.932899949  | 2.486099982  |
| H | -0.036699984 | 0.932899949  | 0.941899960  |
| H | 7.328499951  | 0.932899949  | 5.475599957  |
| H | 2.470704078  | 20.934688170 | 5.199151668  |
| H | 12.488583517 | 21.931531155 | 5.927634288  |

5-c:

|    |             |             |              |
|----|-------------|-------------|--------------|
| Ti | 3.247200000 | 3.247194072 | 1.478700000  |
| Ti | 3.247200000 | 3.247194072 | 4.436100000  |
| Ti | 0.000000000 | 3.247194072 | 2.957400000  |
| Ti | 0.000000000 | 3.247194072 | 0.000000000  |
| Ti | 3.247200000 | 3.247194072 | 7.393500000  |
| Ti | 3.247200000 | 3.247194072 | 10.350900000 |
| Ti | 0.000000000 | 3.247194072 | 8.872200000  |
| Ti | 0.000000000 | 3.247194072 | 5.914800000  |
| Ti | 9.741600000 | 3.247194072 | 1.478700000  |
| Ti | 9.741600000 | 3.247194072 | 4.436100000  |
| Ti | 6.494400000 | 3.247194072 | 2.957400000  |
| Ti | 6.494400000 | 3.247194072 | 0.000000000  |

|    |             |             |              |
|----|-------------|-------------|--------------|
| Ti | 9.741600000 | 3.247194072 | 7.393500000  |
| Ti | 9.741600000 | 3.247194072 | 10.350900000 |
| Ti | 6.494400000 | 3.247194072 | 8.872200000  |
| Ti | 6.494400000 | 3.247194072 | 5.914800000  |
| Ti | 0.000000000 | 6.494391717 | 4.436100000  |
| Ti | 0.000000000 | 6.494391717 | 1.478700000  |
| Ti | 3.247200000 | 6.494391717 | 2.957400000  |
| Ti | 3.247200000 | 6.494391717 | 0.000000000  |
| Ti | 0.000000000 | 6.494391717 | 10.350900000 |
| Ti | 0.000000000 | 6.494391717 | 7.393500000  |
| Ti | 3.247200000 | 6.494391717 | 8.872200000  |
| Ti | 3.247200000 | 6.494391717 | 5.914800000  |
| Ti | 6.494400000 | 6.494391717 | 4.436100000  |
| Ti | 6.494400000 | 6.494391717 | 1.478700000  |
| Ti | 9.741600000 | 6.494391717 | 2.957400000  |
| Ti | 9.741600000 | 6.494391717 | 0.000000000  |
| Ti | 6.494400000 | 6.494391717 | 10.350900000 |
| Ti | 6.494400000 | 6.494391717 | 7.393500000  |
| Ti | 9.741600000 | 6.494391717 | 8.872200000  |
| Ti | 9.741600000 | 6.494391717 | 5.914800000  |
| Ti | 3.228568086 | 9.734444494 | 1.488131622  |
| Ti | 3.229655768 | 9.751169190 | 4.438416354  |



|    |              |              |              |
|----|--------------|--------------|--------------|
| Ti | -0.020926126 | 9.822515697  | 2.966074054  |
| Ti | -0.009060727 | 9.797189873  | 0.007631866  |
| Ti | 3.229648884  | 9.750540893  | 7.392582496  |
| Ti | 3.228598999  | 9.733104318  | 10.344266907 |
| Ti | -0.017263544 | 9.836420379  | 8.877984674  |
| Ti | -0.010634840 | 9.792145997  | 5.923098819  |
| Ti | 9.732677604  | 9.739889852  | 1.479908985  |
| Ti | 9.729033985  | 9.738429303  | 4.437056778  |
| Ti | 6.478808244  | 9.765840758  | 2.967393883  |
| Ti | 6.481546673  | 9.762077407  | 0.012310473  |
| Ti | 9.732274042  | 9.737827081  | 7.394890569  |
| Ti | 9.735824140  | 9.739118322  | 10.353375107 |
| Ti | 6.481124277  | 9.770492440  | 8.888016293  |
| Ti | 6.480616285  | 9.736179365  | 5.929265235  |
| Ti | -0.027079830 | 13.126475792 | 1.480238794  |
| Ti | -0.032756585 | 13.128378184 | 4.483558817  |
| Ti | 3.216245222  | 13.022027797 | 2.967066794  |
| Ti | 3.217206263  | 13.018789157 | 5.920972567  |
| Ti | 6.463992050  | 13.126837625 | 1.442818812  |
| Ti | 6.467075072  | 13.024245588 | 4.425154071  |
| Ti | 9.711416627  | 12.994538474 | 2.962951631  |
| Ti | 9.712895142  | 12.995753276 | 5.921162077  |

|    |              |              |              |
|----|--------------|--------------|--------------|
| Ti | -0.031021800 | 13.157322698 | 7.413092893  |
| Ti | -0.027809800 | 13.165120150 | 10.383598434 |
| Ti | 3.215351462  | 13.018808803 | 8.874964578  |
| Ti | 3.216248859  | 12.974442622 | 0.005873278  |
| Ti | 6.466433165  | 13.024040561 | 7.426292124  |
| Ti | 6.463296630  | 13.126593307 | 10.414538280 |
| Ti | 9.713003338  | 12.993798377 | 8.881128982  |
| Ti | 9.714074914  | 12.997137744 | 0.008193299  |
| Ti | 9.696023730  | 16.311889969 | 1.480146287  |
| Ti | 9.697649797  | 16.308074469 | 4.437906617  |
| Ti | 6.444667573  | 16.328128529 | 2.942906847  |
| Ti | -0.054366181 | 16.597856433 | 5.926560160  |
| Ti | 3.201344470  | 16.256376254 | 1.511935143  |
| Ti | 3.200801019  | 16.400950588 | 4.514539712  |
| Ti | -0.042369466 | 16.423571771 | 2.962842089  |
| Ti | 6.453989765  | 16.305863107 | 5.922773387  |
| Ti | 3.198774766  | 16.399409671 | 7.334521991  |
| Ti | 3.196857879  | 16.256751303 | 10.335520810 |
| Ti | -0.048523949 | 16.521354963 | 8.884126958  |
| Ti | 6.446711101  | 16.755922894 | 0.008683991  |
| Ti | 9.691476610  | 16.305468412 | 7.402825865  |
| Ti | 9.694082034  | 16.311798172 | 10.361520260 |

|    |              |              |              |
|----|--------------|--------------|--------------|
| Ti | 6.438529196  | 16.323359689 | 8.908258040  |
| Ti | -0.047129991 | 16.625712232 | 0.010460797  |
| Ti | 6.441101498  | 19.568119871 | 7.610015749  |
| Ti | 6.423276708  | 20.108744760 | 10.385123743 |
| Ti | 3.205885355  | 19.535423079 | 8.872453982  |
| Ti | 3.195034641  | 19.518269756 | 0.010823611  |
| Ti | 6.428552499  | 20.107323859 | 1.466340434  |
| Ti | 6.443732769  | 19.572085748 | 4.240162313  |
| Ti | 3.205046798  | 19.532560560 | 2.973341569  |
| Ti | 3.190078505  | 19.964667277 | 5.922054739  |
| Ti | -0.046751627 | 19.970347666 | 1.480499400  |
| Ti | -0.083521101 | 19.801269044 | 4.329914080  |
| Ti | 9.671053541  | 19.560144181 | 2.958375824  |
| Ti | 9.666690993  | 19.545860877 | 5.921419962  |
| Ti | -0.085887531 | 19.857133163 | 7.497557420  |
| Ti | -0.045413651 | 19.980534717 | 10.381853568 |
| Ti | 9.667227950  | 19.561316835 | 8.886759872  |
| Ti | 9.688084975  | 19.560844273 | 0.005974539  |
| O  | 0.000000000  | 1.266694833  | 2.957400000  |
| O  | 0.000000000  | 1.266694833  | 0.000000000  |
| O  | 0.000000000  | 1.266694833  | 8.872200000  |
| O  | 0.000000000  | 1.266694833  | 5.914800000  |

|   |             |             |              |
|---|-------------|-------------|--------------|
| O | 6.494400000 | 1.266694833 | 2.957400000  |
| O | 6.494400000 | 1.266694833 | 0.000000000  |
| O | 6.494400000 | 1.266694833 | 8.872200000  |
| O | 6.494400000 | 1.266694833 | 5.914800000  |
| O | 9.741600000 | 1.980495667 | 8.872200000  |
| O | 9.741600000 | 1.980495667 | 5.914800000  |
| O | 9.741600000 | 1.980495667 | 2.957400000  |
| O | 9.741600000 | 1.980495667 | 0.000000000  |
| O | 3.247200000 | 1.980495667 | 8.872200000  |
| O | 3.247200000 | 1.980495667 | 5.914800000  |
| O | 3.247200000 | 1.980495667 | 2.957400000  |
| O | 3.247200000 | 1.980495667 | 0.000000000  |
| O | 1.266698949 | 3.247194072 | 1.478700000  |
| O | 1.266698949 | 3.247194072 | 4.436100000  |
| O | 5.227599738 | 3.247194072 | 1.478700000  |
| O | 5.227599738 | 3.247194072 | 4.436100000  |
| O | 1.266698949 | 3.247194072 | 7.393500000  |
| O | 1.266698949 | 3.247194072 | 10.350900000 |
| O | 5.227599738 | 3.247194072 | 7.393500000  |
| O | 5.227599738 | 3.247194072 | 10.350900000 |
| O | 7.761098949 | 3.247194072 | 1.478700000  |
| O | 7.761098949 | 3.247194072 | 4.436100000  |

|   |              |             |              |
|---|--------------|-------------|--------------|
| O | 11.721999738 | 3.247194072 | 1.478700000  |
| O | 11.721999738 | 3.247194072 | 4.436100000  |
| O | 7.761098949  | 3.247194072 | 7.393500000  |
| O | 7.761098949  | 3.247194072 | 10.350900000 |
| O | 11.721999738 | 3.247194072 | 7.393500000  |
| O | 11.721999738 | 3.247194072 | 10.350900000 |
| O | 9.741600000  | 4.513896049 | 8.872200000  |
| O | 9.741600000  | 4.513896049 | 5.914800000  |
| O | 9.741600000  | 4.513896049 | 2.957400000  |
| O | 9.741600000  | 4.513896049 | 0.000000000  |
| O | 3.247200000  | 4.513896049 | 8.872200000  |
| O | 3.247200000  | 4.513896049 | 5.914800000  |
| O | 3.247200000  | 4.513896049 | 2.957400000  |
| O | 3.247200000  | 4.513896049 | 0.000000000  |
| O | 0.000000000  | 5.227596870 | 2.957400000  |
| O | 0.000000000  | 5.227596870 | 0.000000000  |
| O | 0.000000000  | 5.227596870 | 8.872200000  |
| O | 0.000000000  | 5.227596870 | 5.914800000  |
| O | 6.494400000  | 5.227596870 | 0.000000000  |
| O | 6.494400000  | 5.227596870 | 2.957400000  |
| O | 6.494400000  | 5.227596870 | 8.872200000  |
| O | 6.494400000  | 5.227596870 | 5.914800000  |

|   |              |             |              |
|---|--------------|-------------|--------------|
| O | 8.474899752  | 6.494391717 | 7.393500000  |
| O | 11.008298949 | 6.494391717 | 7.393500000  |
| O | 8.474899752  | 6.494391717 | 10.350900000 |
| O | 11.008298949 | 6.494391717 | 10.350900000 |
| O | 8.474899752  | 6.494391717 | 1.478700000  |
| O | 11.008298949 | 6.494391717 | 1.478700000  |
| O | 8.474899752  | 6.494391717 | 4.436100000  |
| O | 11.008298949 | 6.494391717 | 4.436100000  |
| O | 1.980499752  | 6.494391717 | 1.478700000  |
| O | 4.513898949  | 6.494391717 | 1.478700000  |
| O | 1.980499752  | 6.494391717 | 4.436100000  |
| O | 4.513898949  | 6.494391717 | 4.436100000  |
| O | 1.980499752  | 6.494391717 | 7.393500000  |
| O | 4.513898949  | 6.494391717 | 7.393500000  |
| O | 1.980499752  | 6.494391717 | 10.350900000 |
| O | 4.513898949  | 6.494391717 | 10.350900000 |
| O | 0.000000000  | 7.761086550 | 8.872200000  |
| O | 0.000000000  | 7.761086550 | 5.914800000  |
| O | 6.494400000  | 7.761086550 | 2.957400000  |
| O | 6.494400000  | 7.761086550 | 0.000000000  |
| O | 0.000000000  | 7.761086550 | 2.957400000  |
| O | 0.000000000  | 7.761086550 | 0.000000000  |

|   |              |             |              |
|---|--------------|-------------|--------------|
| O | 6.494400000  | 7.761086550 | 8.872200000  |
| O | 6.494400000  | 7.761086550 | 5.914800000  |
| O | 3.247200000  | 8.474887384 | 2.957400000  |
| O | 3.247200000  | 8.474887384 | 0.000000000  |
| O | 3.247200000  | 8.474887384 | 8.872200000  |
| O | 3.247200000  | 8.474887384 | 5.914800000  |
| O | 9.741600000  | 8.474887384 | 2.957400000  |
| O | 9.741600000  | 8.474887384 | 0.000000000  |
| O | 9.741600000  | 8.474887384 | 8.872200000  |
| O | 9.741600000  | 8.474887384 | 5.914800000  |
| O | 1.266835591  | 9.783439854 | 1.482202745  |
| O | 1.266052626  | 9.783518078 | 4.439551759  |
| O | 5.210985504  | 9.772115868 | 1.484527143  |
| O | 5.210755992  | 9.771606158 | 4.445015733  |
| O | 1.266705833  | 9.783959922 | 7.395544628  |
| O | 1.267145244  | 9.785463691 | 10.355628528 |
| O | 5.210974204  | 9.771798683 | 7.396762012  |
| O | 5.210840290  | 9.772373759 | 10.357044176 |
| O | 7.758612763  | 9.780805580 | 1.485778833  |
| O | 7.758412606  | 9.778441341 | 4.444278512  |
| O | 11.701858396 | 9.776029238 | 1.480410442  |
| O | 11.701865799 | 9.775016963 | 4.442285816  |

|   |              |              |              |
|---|--------------|--------------|--------------|
| O | 7.759018923  | 9.778563500  | 7.396558543  |
| O | 7.759416250  | 9.780823082  | 10.356071901 |
| O | 11.702665390 | 9.776198546  | 7.394208830  |
| O | 11.702448087 | 9.778543497  | 10.356487593 |
| O | 9.728585872  | 11.068180270 | 2.962346074  |
| O | 9.728740179  | 11.069235409 | 0.002786581  |
| O | 3.239504396  | 11.070398061 | 2.960010201  |
| O | 3.241258403  | 11.063657891 | 0.002882164  |
| O | 3.239375807  | 11.069764764 | 8.874850658  |
| O | 3.240468165  | 11.072609066 | 5.917099319  |
| O | 9.728363763  | 11.068374938 | 8.872492783  |
| O | 9.727256728  | 11.070682027 | 5.917361936  |
| O | 6.467683857  | 11.789981082 | 8.871231511  |
| O | -0.029790202 | 11.796956998 | 2.962192644  |
| O | 6.466377054  | 11.789056675 | 0.008657611  |
| O | 6.468297708  | 11.799053702 | 5.922549689  |
| O | -0.029142191 | 11.798634718 | 0.007199968  |
| O | -0.029898659 | 11.798520060 | 5.918719856  |
| O | 6.467043379  | 11.792079215 | 2.973277334  |
| O | -0.028011646 | 11.798887609 | 8.872378627  |
| O | 8.441010544  | 13.081508461 | 1.487480994  |
| O | 8.436826072  | 13.091294745 | 4.444276265  |



|   |              |              |              |
|---|--------------|--------------|--------------|
| O | 10.974683285 | 13.107799769 | 1.487149647  |
| O | 10.973702891 | 13.112929014 | 4.440203570  |
| O | 1.955748425  | 13.087587473 | 1.486209548  |
| O | 1.954844274  | 13.090476781 | 4.441833925  |
| O | 4.490720176  | 13.097237668 | 1.487583083  |
| O | 4.495256124  | 13.102225823 | 4.445082570  |
| O | 1.955300960  | 13.091085789 | 7.397335748  |
| O | 1.955648801  | 13.086375886 | 10.355839686 |
| O | 4.495444462  | 13.101567165 | 7.396580310  |
| O | 4.490335837  | 13.097389831 | 10.354091981 |
| O | 8.436992848  | 13.090890049 | 7.397354439  |
| O | 8.441407612  | 13.082100324 | 10.353447504 |
| O | 10.973590408 | 13.113470870 | 7.398921624  |
| O | 10.974686922 | 13.106160625 | 10.354191113 |
| O | -0.029196744 | 14.417006254 | 2.962463305  |
| O | -0.027249204 | 14.396124227 | 5.921478046  |
| O | -0.029575887 | 14.415479982 | 8.883446401  |
| O | -0.025846413 | 14.395766323 | 0.011178854  |
| O | 6.468847264  | 14.403981330 | 2.970642764  |
| O | 6.465128570  | 14.422006553 | 5.921976782  |
| O | 6.467459280  | 14.401873553 | 8.875706530  |
| O | 6.468891685  | 14.368617759 | 0.009062775  |

|   |              |              |              |
|---|--------------|--------------|--------------|
| O | 9.677183605  | 15.104977269 | 8.883281733  |
| O | 3.209550275  | 15.101265353 | 8.871651343  |
| O | 9.675285292  | 15.106373880 | 5.921423156  |
| O | 9.677209323  | 15.104560428 | 2.959031657  |
| O | 3.210203741  | 15.100303798 | 2.974840379  |
| O | 9.690616102  | 15.100119845 | 0.006412944  |
| O | 3.196829953  | 15.088826577 | 0.007690423  |
| O | 3.213510170  | 15.100818151 | 5.922993772  |
| O | 1.237354003  | 16.456979370 | 10.359450671 |
| O | 5.184322745  | 16.459170729 | 4.436325354  |
| O | 5.183572772  | 16.458414559 | 7.410046062  |
| O | 7.726599397  | 16.454366170 | 1.465506329  |
| O | 7.726846444  | 16.472711793 | 4.440074509  |
| O | 5.172547749  | 16.430026547 | 10.381671510 |
| O | 11.654719832 | 16.439878912 | 1.480485323  |
| O | 11.650107899 | 16.420997862 | 4.441860187  |
| O | 1.227934785  | 16.446488351 | 4.438327632  |
| O | 1.239091385  | 16.453669293 | 1.484341655  |
| O | 5.173961450  | 16.429500406 | 1.466633690  |
| O | 7.725498856  | 16.471074078 | 7.406631093  |
| O | 7.725795780  | 16.453342107 | 10.380552194 |
| O | 1.226379116  | 16.446849112 | 7.410020746  |

|   |              |              |              |
|---|--------------|--------------|--------------|
| O | 11.649231935 | 16.423462828 | 7.405781491  |
| O | 11.654367316 | 16.442957173 | 10.364910978 |
| O | 3.223778596  | 17.715677797 | 8.893702072  |
| O | 3.218237704  | 17.707442430 | 0.008990259  |
| O | 9.685249520  | 17.733362618 | 2.962278409  |
| O | 9.694981378  | 17.724448591 | 5.922476937  |
| O | 3.224388940  | 17.712895646 | 2.951987721  |
| O | 3.192457144  | 17.686067839 | 5.924570658  |
| O | 9.683913232  | 17.734021276 | 8.881115496  |
| O | 9.685086121  | 17.731725618 | 0.006817280  |
| O | 6.436747393  | 18.603367883 | 0.009652244  |
| O | 6.446199862  | 18.648693476 | 5.924227718  |
| O | -0.063732665 | 18.500426515 | 0.004116346  |
| O | 6.442077087  | 18.435362260 | 2.853103030  |
| O | -0.105351507 | 18.471377345 | 5.927753294  |
| O | 6.440143704  | 18.432273283 | 8.996681106  |
| O | -0.076042280 | 18.474239506 | 8.867366544  |
| O | -0.076785110 | 18.463733484 | 2.972863062  |
| O | 1.950434447  | 19.859898883 | 4.413344227  |
| O | 4.419857699  | 19.948854844 | 1.482372854  |
| O | 4.462349259  | 19.917520017 | 4.442439483  |
| O | 1.948901898  | 19.870515991 | 7.437364275  |

|   |              |              |              |
|---|--------------|--------------|--------------|
| O | 1.965102958  | 19.881382774 | 10.352968642 |
| O | 4.461871272  | 19.917698969 | 7.405997618  |
| O | 4.418103692  | 19.951953823 | 10.365686527 |
| O | 8.455221460  | 19.957645641 | 1.481776761  |
| O | 8.425347090  | 19.921239791 | 4.454818922  |
| O | 10.910320144 | 19.920645785 | 1.490015012  |
| O | 10.898102619 | 19.934385445 | 4.451403125  |
| O | 8.424345004  | 19.921229790 | 7.390540234  |
| O | 8.453510835  | 19.957362032 | 10.363934681 |
| O | 10.899651664 | 19.941978228 | 7.394831067  |
| O | 10.911660069 | 19.921928810 | 10.352090886 |
| O | 1.966460418  | 19.880508731 | 1.494255096  |
| O | 6.443922276  | 21.035427464 | 3.054425078  |
| O | -0.051908570 | 21.056392359 | 2.985637728  |
| O | 0.000155866  | 21.107040435 | 5.920696819  |
| O | -0.050303804 | 21.070673162 | 8.868002266  |
| O | -0.045061524 | 21.103581767 | 0.012411498  |
| O | 6.442670415  | 21.032656029 | 8.795695729  |
| O | 6.438145247  | 21.247123465 | 0.011421006  |
| H | 0.000000000  | 0.932897449  | 9.814799089  |
| H | 0.816399334  | 0.932897449  | 8.400899272  |
| H | 6.457698847  | 0.932897449  | 6.856699960  |

|   |              |              |              |
|---|--------------|--------------|--------------|
| H | 0.834099172  | 0.932897449  | -0.439201108 |
| H | 0.000000000  | 0.932897449  | 3.899999089  |
| H | 0.816399334  | 0.932897449  | 2.486099272  |
| H | 6.457698847  | 0.932897449  | 0.941899960  |
| H | 0.834099172  | 0.932897449  | 5.475598892  |
| H | 6.494400000  | 0.932897449  | 9.814799089  |
| H | 7.310799334  | 0.932897449  | 8.400899272  |
| H | -0.036701153 | 0.932897449  | 6.856699960  |
| H | 7.328499172  | 0.932897449  | -0.439201108 |
| H | 6.494400000  | 0.932897449  | 3.899999089  |
| H | 7.310799334  | 0.932897449  | 2.486099272  |
| H | -0.036701153 | 0.932897449  | 0.941899960  |
| H | 7.328499172  | 0.932897449  | 5.475598892  |
| H | 3.002210190  | 21.675145003 | 5.921863572  |
| H | 0.764372306  | 21.720517387 | 5.909359449  |

TS5-3:

|    |             |             |              |
|----|-------------|-------------|--------------|
| Ti | 3.247200000 | 3.247190143 | 1.478700000  |
| Ti | 3.247200000 | 3.247190143 | 4.436100000  |
| Ti | 0.000000000 | 3.247190143 | 2.957400000  |
| Ti | 0.000000000 | 3.247190143 | 0.000000000  |
| Ti | 3.247200000 | 3.247190143 | 7.393500000  |
| Ti | 3.247200000 | 3.247190143 | 10.350900000 |

|    |             |             |              |
|----|-------------|-------------|--------------|
| Ti | 0.000000000 | 3.247190143 | 8.872200000  |
| Ti | 0.000000000 | 3.247190143 | 5.914800000  |
| Ti | 9.741600000 | 3.247190143 | 1.478700000  |
| Ti | 9.741600000 | 3.247190143 | 4.436100000  |
| Ti | 6.494400000 | 3.247190143 | 2.957400000  |
| Ti | 6.494400000 | 3.247190143 | 0.000000000  |
| Ti | 9.741600000 | 3.247190143 | 7.393500000  |
| Ti | 9.741600000 | 3.247190143 | 10.350900000 |
| Ti | 6.494400000 | 3.247190143 | 8.872200000  |
| Ti | 6.494400000 | 3.247190143 | 5.914800000  |
| Ti | 0.000000000 | 6.494389931 | 4.436100000  |
| Ti | 0.000000000 | 6.494389931 | 1.478700000  |
| Ti | 3.247200000 | 6.494389931 | 2.957400000  |
| Ti | 3.247200000 | 6.494389931 | 0.000000000  |
| Ti | 0.000000000 | 6.494389931 | 10.350900000 |
| Ti | 0.000000000 | 6.494389931 | 7.393500000  |
| Ti | 3.247200000 | 6.494389931 | 8.872200000  |
| Ti | 3.247200000 | 6.494389931 | 5.914800000  |
| Ti | 6.494400000 | 6.494389931 | 4.436100000  |
| Ti | 6.494400000 | 6.494389931 | 1.478700000  |
| Ti | 9.741600000 | 6.494389931 | 2.957400000  |
| Ti | 9.741600000 | 6.494389931 | 0.000000000  |

|    |              |              |              |
|----|--------------|--------------|--------------|
| Ti | 6.494400000  | 6.494389931  | 10.350900000 |
| Ti | 6.494400000  | 6.494389931  | 7.393500000  |
| Ti | 9.741600000  | 6.494389931  | 8.872200000  |
| Ti | 9.741600000  | 6.494389931  | 5.914800000  |
| Ti | 3.228304673  | 9.733974790  | 1.486625122  |
| Ti | 3.228687193  | 9.752676887  | 4.439949470  |
| Ti | -0.016473565 | 9.827427770  | 2.963964245  |
| Ti | -0.005018872 | 9.822218872  | 0.002962842  |
| Ti | 3.229445739  | 9.751737478  | 7.390404194  |
| Ti | 3.231255339  | 9.734275901  | 10.343210050 |
| Ti | -0.012672523 | 9.833030292  | 8.874925303  |
| Ti | -0.011293112 | 9.822559274  | 5.919083498  |
| Ti | 9.740928479  | 9.739360140  | 1.481061780  |
| Ti | 9.732218839  | 9.738022107  | 4.438298886  |
| Ti | 6.482576945  | 9.764674534  | 2.964181791  |
| Ti | 6.483810101  | 9.767149501  | 0.010794392  |
| Ti | 9.736530991  | 9.739103677  | 7.395824398  |
| Ti | 9.742002393  | 9.738001033  | 10.354512996 |
| Ti | 6.486847662  | 9.763970513  | 8.887461958  |
| Ti | 6.478079443  | 9.735767168  | 5.926860159  |
| Ti | -0.025972015 | 13.158088870 | 1.494720118  |
| Ti | -0.029887748 | 13.160966390 | 4.456612290  |

|    |              |              |              |
|----|--------------|--------------|--------------|
| Ti | 3.218945853  | 13.014842925 | 2.965640144  |
| Ti | 3.218379801  | 13.020726912 | 5.919294775  |
| Ti | 6.462124521  | 13.135410536 | 1.432059199  |
| Ti | 6.468338882  | 13.021168398 | 4.411188045  |
| Ti | 9.711125028  | 12.994973531 | 2.962118236  |
| Ti | 9.714524976  | 12.997760326 | 5.922326820  |
| Ti | -0.028728108 | 13.159512985 | 7.408616336  |
| Ti | -0.026736536 | 13.164950842 | 10.374033374 |
| Ti | 3.219151466  | 13.015293341 | 8.872374013  |
| Ti | 3.214423023  | 12.978426359 | 0.003113314  |
| Ti | 6.469397209  | 13.014967941 | 7.423161539  |
| Ti | 6.465115062  | 13.136938951 | 10.404051812 |
| Ti | 9.714378722  | 12.994497754 | 8.881009858  |
| Ti | 9.714448342  | 12.997531010 | 0.007556512  |
| Ti | 9.702463706  | 16.314100617 | 1.478926182  |
| Ti | 9.696193883  | 16.314345292 | 4.436270110  |
| Ti | 6.439916400  | 16.337950533 | 2.938468381  |
| Ti | -0.057860688 | 16.597411017 | 5.920981794  |
| Ti | 3.203818187  | 16.272847345 | 1.499420727  |
| Ti | 3.197448999  | 16.380659353 | 4.480915138  |
| Ti | -0.048577852 | 16.565591126 | 2.962644890  |
| Ti | 6.456880293  | 16.287339604 | 5.918652428  |



|    |              |              |              |
|----|--------------|--------------|--------------|
| Ti | 3.199325361  | 16.381833436 | 7.355851233  |
| Ti | 3.205871327  | 16.271927581 | 10.337449863 |
| Ti | -0.046560172 | 16.563824109 | 8.879133920  |
| Ti | 6.456442440  | 16.767611571 | 0.003270056  |
| Ti | 9.696487300  | 16.314476737 | 7.399559358  |
| Ti | 9.704047041  | 16.317985412 | 10.356576552 |
| Ti | 6.442415965  | 16.334854769 | 8.899792187  |
| Ti | -0.039088754 | 16.607718084 | 0.005827734  |
| Ti | 6.417314589  | 19.604868623 | 7.603685612  |
| Ti | 6.431160650  | 20.122920906 | 10.380000225 |
| Ti | 3.217024160  | 19.534999809 | 8.883608348  |
| Ti | 3.193848244  | 19.527179140 | 0.006012039  |
| Ti | 6.429855406  | 20.121433925 | 1.460265816  |
| Ti | 6.418306544  | 19.604813258 | 4.238263307  |
| Ti | 3.213845281  | 19.535090535 | 2.958733551  |
| Ti | 3.141700290  | 19.728178736 | 5.921662824  |
| Ti | -0.050958569 | 19.971141698 | 1.468650991  |
| Ti | -0.087674920 | 19.896023981 | 4.385356576  |
| Ti | 9.675306464  | 19.572644393 | 2.959601962  |
| Ti | 9.641166052  | 19.557480617 | 5.919186771  |
| Ti | -0.086024173 | 19.892675328 | 7.450512994  |
| Ti | -0.049939338 | 19.969127148 | 10.364969771 |

|    |             |              |             |
|----|-------------|--------------|-------------|
| Ti | 9.677998652 | 19.573162675 | 8.877696387 |
| Ti | 9.683986359 | 19.564107201 | 0.004556644 |
| O  | 0.000000000 | 1.266689833  | 2.957400000 |
| O  | 0.000000000 | 1.266689833  | 0.000000000 |
| O  | 0.000000000 | 1.266689833  | 8.872200000 |
| O  | 0.000000000 | 1.266689833  | 5.914800000 |
| O  | 6.494400000 | 1.266689833  | 2.957400000 |
| O  | 6.494400000 | 1.266689833  | 0.000000000 |
| O  | 6.494400000 | 1.266689833  | 8.872200000 |
| O  | 6.494400000 | 1.266689833  | 5.914800000 |
| O  | 9.741600000 | 1.980499953  | 8.872200000 |
| O  | 9.741600000 | 1.980499953  | 5.914800000 |
| O  | 9.741600000 | 1.980499953  | 2.957400000 |
| O  | 9.741600000 | 1.980499953  | 0.000000000 |
| O  | 3.247200000 | 1.980499953  | 8.872200000 |
| O  | 3.247200000 | 1.980499953  | 5.914800000 |
| O  | 3.247200000 | 1.980499953  | 2.957400000 |
| O  | 3.247200000 | 1.980499953  | 0.000000000 |
| O  | 1.266699988 | 3.247190143  | 1.478700000 |
| O  | 1.266699988 | 3.247190143  | 4.436100000 |
| O  | 5.227599998 | 3.247190143  | 1.478700000 |
| O  | 5.227599998 | 3.247190143  | 4.436100000 |

|   |              |             |              |
|---|--------------|-------------|--------------|
| O | 1.266699988  | 3.247190143 | 7.393500000  |
| O | 1.266699988  | 3.247190143 | 10.350900000 |
| O | 5.227599998  | 3.247190143 | 7.393500000  |
| O | 5.227599998  | 3.247190143 | 10.350900000 |
| O | 7.761099988  | 3.247190143 | 1.478700000  |
| O | 7.761099988  | 3.247190143 | 4.436100000  |
| O | 11.721999998 | 3.247190143 | 1.478700000  |
| O | 11.721999998 | 3.247190143 | 4.436100000  |
| O | 7.761099988  | 3.247190143 | 7.393500000  |
| O | 7.761099988  | 3.247190143 | 10.350900000 |
| O | 11.721999998 | 3.247190143 | 7.393500000  |
| O | 11.721999998 | 3.247190143 | 10.350900000 |
| O | 9.741600000  | 4.513899978 | 8.872200000  |
| O | 9.741600000  | 4.513899978 | 5.914800000  |
| O | 9.741600000  | 4.513899978 | 2.957400000  |
| O | 9.741600000  | 4.513899978 | 0.000000000  |
| O | 3.247200000  | 4.513899978 | 8.872200000  |
| O | 3.247200000  | 4.513899978 | 5.914800000  |
| O | 3.247200000  | 4.513899978 | 2.957400000  |
| O | 3.247200000  | 4.513899978 | 0.000000000  |
| O | 0.000000000  | 5.227600085 | 2.957400000  |
| O | 0.000000000  | 5.227600085 | 0.000000000  |

|   |              |             |              |
|---|--------------|-------------|--------------|
| O | 0.000000000  | 5.227600085 | 8.872200000  |
| O | 0.000000000  | 5.227600085 | 5.914800000  |
| O | 6.494400000  | 5.227600085 | 0.000000000  |
| O | 6.494400000  | 5.227600085 | 2.957400000  |
| O | 6.494400000  | 5.227600085 | 8.872200000  |
| O | 6.494400000  | 5.227600085 | 5.914800000  |
| O | 8.474900012  | 6.494389931 | 7.393500000  |
| O | 11.008299988 | 6.494389931 | 7.393500000  |
| O | 8.474900012  | 6.494389931 | 10.350900000 |
| O | 11.008299988 | 6.494389931 | 10.350900000 |
| O | 8.474900012  | 6.494389931 | 1.478700000  |
| O | 11.008299988 | 6.494389931 | 1.478700000  |
| O | 8.474900012  | 6.494389931 | 4.436100000  |
| O | 11.008299988 | 6.494389931 | 4.436100000  |
| O | 1.980500012  | 6.494389931 | 1.478700000  |
| O | 4.513899988  | 6.494389931 | 1.478700000  |
| O | 1.980500012  | 6.494389931 | 4.436100000  |
| O | 4.513899988  | 6.494389931 | 4.436100000  |
| O | 1.980500012  | 6.494389931 | 7.393500000  |
| O | 4.513899988  | 6.494389931 | 7.393500000  |
| O | 1.980500012  | 6.494389931 | 10.350900000 |
| O | 4.513899988  | 6.494389931 | 10.350900000 |

|   |             |             |              |
|---|-------------|-------------|--------------|
| O | 0.000000000 | 7.761090122 | 8.872200000  |
| O | 0.000000000 | 7.761090122 | 5.914800000  |
| O | 6.494400000 | 7.761090122 | 2.957400000  |
| O | 6.494400000 | 7.761090122 | 0.000000000  |
| O | 0.000000000 | 7.761090122 | 2.957400000  |
| O | 0.000000000 | 7.761090122 | 0.000000000  |
| O | 6.494400000 | 7.761090122 | 8.872200000  |
| O | 6.494400000 | 7.761090122 | 5.914800000  |
| O | 3.247200000 | 8.474889884 | 2.957400000  |
| O | 3.247200000 | 8.474889884 | 0.000000000  |
| O | 3.247200000 | 8.474889884 | 8.872200000  |
| O | 3.247200000 | 8.474889884 | 5.914800000  |
| O | 9.741600000 | 8.474889884 | 2.957400000  |
| O | 9.741600000 | 8.474889884 | 0.000000000  |
| O | 9.741600000 | 8.474889884 | 8.872200000  |
| O | 9.741600000 | 8.474889884 | 5.914800000  |
| O | 1.269244494 | 9.784726094 | 1.480933192  |
| O | 1.267956785 | 9.785407255 | 4.437213047  |
| O | 5.213147360 | 9.773864668 | 1.482442176  |
| O | 5.212640537 | 9.773367818 | 4.441822569  |
| O | 1.268615187 | 9.785198656 | 7.394937060  |
| O | 1.270061879 | 9.785211515 | 10.352102715 |

|   |              |              |              |
|---|--------------|--------------|--------------|
| O | 5.213182430  | 9.773487476  | 7.396577352  |
| O | 5.213708606  | 9.773555699  | 10.354652822 |
| O | 7.760444833  | 9.782154328  | 1.483264569  |
| O | 7.759023469  | 9.779712222  | 4.442382346  |
| O | 11.702495237 | 9.776841488  | 1.478717981  |
| O | 11.701288837 | 9.776028524  | 4.438813000  |
| O | 7.760041531  | 9.779406110  | 7.394415138  |
| O | 7.761307679  | 9.782221480  | 10.354608580 |
| O | 11.702156619 | 9.776029238  | 7.394553426  |
| O | 11.702986863 | 9.777506575  | 10.353423845 |
| O | 9.728757064  | 11.069978006 | 2.960991230  |
| O | 9.727857720  | 11.070626305 | 0.001759062  |
| O | 3.242915125  | 11.072611923 | 2.958187378  |
| O | 3.244412993  | 11.066702219 | 0.001387967  |
| O | 3.242610148  | 11.072659072 | 8.874131655  |
| O | 3.243222310  | 11.075657323 | 5.916497666  |
| O | 9.729835524  | 11.070056231 | 8.872161909  |
| O | 9.726956427  | 11.071830749 | 5.916638675  |
| O | 6.468481629  | 11.792587853 | 8.871509506  |
| O | -0.028573022 | 11.794871010 | 2.958714860  |
| O | 6.466784253  | 11.796091885 | 0.003707160  |
| O | 6.469105221  | 11.798402545 | 5.917606099  |

|   |              |              |              |
|---|--------------|--------------|--------------|
| O | -0.026080991 | 11.795551456 | 0.001442147  |
| O | -0.029120370 | 11.794933518 | 5.916826292  |
| O | 6.468118852  | 11.793763722 | 2.965733717  |
| O | -0.027503394 | 11.795453944 | 8.872240576  |
| O | 8.440880656  | 13.085793309 | 1.487676419  |
| O | 8.437366017  | 13.092222367 | 4.441938026  |
| O | 10.972494413 | 13.112212848 | 1.482780266  |
| O | 10.971577403 | 13.116240163 | 4.440861532  |
| O | 1.960556619  | 13.092093422 | 1.483962516  |
| O | 1.959326449  | 13.092174861 | 4.440992486  |
| O | 4.492729024  | 13.106471380 | 1.485437785  |
| O | 4.498138989  | 13.107130753 | 4.443702174  |
| O | 1.959577653  | 13.093159990 | 7.395175545  |
| O | 1.960434394  | 13.092146286 | 10.351746526 |
| O | 4.498713613  | 13.106887864 | 7.393089158  |
| O | 4.493148692  | 13.105811651 | 10.350576460 |
| O | 8.437832315  | 13.091142225 | 7.396683582  |
| O | 8.441798834  | 13.085404687 | 10.349070079 |
| O | 10.972478177 | 13.116747015 | 7.396230508  |
| O | 10.973224383 | 13.111687065 | 10.354993515 |
| O | -0.025904733 | 14.403987402 | 2.961559642  |
| O | -0.021853786 | 14.397525840 | 5.920633886  |

|   |              |              |              |
|---|--------------|--------------|--------------|
| O | -0.025778092 | 14.405401516 | 8.879375126  |
| O | -0.020759479 | 14.400303347 | 0.006186171  |
| O | 6.468346156  | 14.411455525 | 2.970231094  |
| O | 6.472103945  | 14.418099611 | 5.919105856  |
| O | 6.468891945  | 14.410125708 | 8.866871475  |
| O | 6.478373250  | 14.377194242 | 0.003397579  |
| O | 9.674033431  | 15.112142852 | 8.879351940  |
| O | 3.215937777  | 15.108124110 | 8.859187677  |
| O | 9.668375250  | 15.112780793 | 5.918832356  |
| O | 9.673532973  | 15.111090214 | 2.958940924  |
| O | 3.215583442  | 15.107956231 | 2.979366384  |
| O | 9.679968793  | 15.107632617 | 0.003027076  |
| O | 3.201770633  | 15.093939034 | 0.004214177  |
| O | 3.209604568  | 15.116019789 | 5.919375808  |
| O | 1.244688388  | 16.460061918 | 10.352259813 |
| O | 5.181462741  | 16.466554199 | 4.446109143  |
| O | 5.182336628  | 16.466435612 | 7.392833402  |
| O | 7.727350540  | 16.472571417 | 1.472284216  |
| O | 7.723933576  | 16.485307732 | 4.435329420  |
| O | 5.181184521  | 16.430217643 | 10.379926171 |
| O | 11.656000268 | 16.432513659 | 1.474761571  |
| O | 11.650462623 | 16.411653778 | 4.438083232  |



|   |              |              |              |
|---|--------------|--------------|--------------|
| O | 1.234093684  | 16.465320108 | 4.434577767  |
| O | 1.244137274  | 16.458697453 | 1.487570780  |
| O | 5.180830447  | 16.430358733 | 1.457580142  |
| O | 7.724165296  | 16.485608485 | 7.402512617  |
| O | 7.728208190  | 16.472832880 | 10.365691968 |
| O | 1.234645578  | 16.465595859 | 7.405552470  |
| O | 11.650784746 | 16.412157416 | 7.402743886  |
| O | 11.656660879 | 16.432710828 | 10.364919022 |
| O | 3.261811361  | 17.712216628 | 8.900711465  |
| O | 3.225605211  | 17.709572353 | 0.005421742  |
| O | 9.695993985  | 17.743422867 | 2.964240466  |
| O | 9.695038529  | 17.734379537 | 5.919270524  |
| O | 3.260638342  | 17.711836936 | 2.938384864  |
| O | 3.186569191  | 17.758146586 | 5.919922453  |
| O | 9.696626540  | 17.743904359 | 8.873949480  |
| O | 9.688651806  | 17.735619700 | 0.004737400  |
| O | 6.440296193  | 18.612114031 | 0.004890948  |
| O | 6.424434790  | 18.699094020 | 5.920656717  |
| O | -0.064686302 | 18.488867140 | 0.006292992  |
| O | 6.411273109  | 18.453762532 | 2.861024249  |
| O | -0.140076025 | 18.461248872 | 5.920737040  |
| O | 6.410951246  | 18.453686451 | 8.979719234  |

|   |              |              |              |
|---|--------------|--------------|--------------|
| O | -0.109817836 | 18.468780575 | 8.878047844  |
| O | -0.109961103 | 18.468813794 | 2.962490750  |
| O | 1.929009551  | 19.734057365 | 4.356520506  |
| O | 4.421799395  | 19.969224304 | 1.460525003  |
| O | 4.427407699  | 19.969460049 | 4.460577217  |
| O | 1.929770954  | 19.734202027 | 7.484225816  |
| O | 1.965420924  | 19.875853477 | 10.348732817 |
| O | 4.427694751  | 19.971609617 | 7.380585862  |
| O | 4.422352848  | 19.969542560 | 10.380939376 |
| O | 8.452150908  | 19.955160315 | 1.484828206  |
| O | 8.412249314  | 19.927165926 | 4.446006225  |
| O | 10.906165937 | 19.934061831 | 1.485766885  |
| O | 10.890970859 | 19.979758186 | 4.459702063  |
| O | 8.412493114  | 19.927222362 | 7.393706900  |
| O | 8.452988296  | 19.955702886 | 10.354811930 |
| O | 10.891315062 | 19.980736886 | 7.378837447  |
| O | 10.906699127 | 19.932962044 | 10.353289343 |
| O | 1.965134261  | 19.877524053 | 1.490776129  |
| O | 6.434870122  | 21.059050208 | 3.043796301  |
| O | -0.046399111 | 21.066478683 | 2.972460974  |
| O | 0.216041022  | 21.060196429 | 5.919094618  |
| O | -0.046359105 | 21.065321745 | 8.864200351  |

|   |              |              |              |
|---|--------------|--------------|--------------|
| O | -0.045301038 | 21.093350067 | 0.002859924  |
| O | 6.435224326  | 21.060233934 | 8.796867096  |
| O | 6.453366822  | 21.259674398 | 0.005895281  |
| H | 0.000000000  | 0.932899949  | 9.814800036  |
| H | 0.816399984  | 0.932899949  | 8.400899982  |
| H | 6.457700016  | 0.932899949  | 6.856699960  |
| H | 0.834099951  | 0.932899949  | -0.439200043 |
| H | 0.000000000  | 0.932899949  | 3.900000036  |
| H | 0.816399984  | 0.932899949  | 2.486099982  |
| H | 6.457700016  | 0.932899949  | 0.941899960  |
| H | 0.834099951  | 0.932899949  | 5.475599957  |
| H | 6.494400000  | 0.932899949  | 9.814800036  |
| H | 7.310799984  | 0.932899949  | 8.400899982  |
| H | -0.036699984 | 0.932899949  | 6.856699960  |
| H | 7.328499951  | 0.932899949  | -0.439200043 |
| H | 6.494400000  | 0.932899949  | 3.900000036  |
| H | 7.310799984  | 0.932899949  | 2.486099982  |
| H | -0.036699984 | 0.932899949  | 0.941899960  |
| H | 7.328499951  | 0.932899949  | 5.475599957  |
| H | 2.410010273  | 21.502698082 | 5.919635231  |
| H | 1.397431091  | 21.377011228 | 5.919352858  |

TS6-1:

|    |             |             |              |
|----|-------------|-------------|--------------|
| Ti | 3.247200000 | 3.247190143 | 1.478700000  |
| Ti | 3.247200000 | 3.247190143 | 4.436100000  |
| Ti | 0.000000000 | 3.247190143 | 2.957400000  |
| Ti | 0.000000000 | 3.247190143 | 0.000000000  |
| Ti | 3.247200000 | 3.247190143 | 7.393500000  |
| Ti | 3.247200000 | 3.247190143 | 10.350900000 |
| Ti | 0.000000000 | 3.247190143 | 8.872200000  |
| Ti | 0.000000000 | 3.247190143 | 5.914800000  |
| Ti | 9.741600000 | 3.247190143 | 1.478700000  |
| Ti | 9.741600000 | 3.247190143 | 4.436100000  |
| Ti | 6.494400000 | 3.247190143 | 2.957400000  |
| Ti | 6.494400000 | 3.247190143 | 0.000000000  |
| Ti | 9.741600000 | 3.247190143 | 7.393500000  |
| Ti | 9.741600000 | 3.247190143 | 10.350900000 |
| Ti | 6.494400000 | 3.247190143 | 8.872200000  |
| Ti | 6.494400000 | 3.247190143 | 5.914800000  |
| Ti | 0.000000000 | 6.494389931 | 4.436100000  |
| Ti | 0.000000000 | 6.494389931 | 1.478700000  |
| Ti | 3.247200000 | 6.494389931 | 2.957400000  |
| Ti | 3.247200000 | 6.494389931 | 0.000000000  |
| Ti | 0.000000000 | 6.494389931 | 10.350900000 |
| Ti | 0.000000000 | 6.494389931 | 7.393500000  |

|    |              |             |              |
|----|--------------|-------------|--------------|
| Ti | 3.247200000  | 6.494389931 | 8.872200000  |
| Ti | 3.247200000  | 6.494389931 | 5.914800000  |
| Ti | 6.494400000  | 6.494389931 | 4.436100000  |
| Ti | 6.494400000  | 6.494389931 | 1.478700000  |
| Ti | 9.741600000  | 6.494389931 | 2.957400000  |
| Ti | 9.741600000  | 6.494389931 | 0.000000000  |
| Ti | 6.494400000  | 6.494389931 | 10.350900000 |
| Ti | 6.494400000  | 6.494389931 | 7.393500000  |
| Ti | 9.741600000  | 6.494389931 | 8.872200000  |
| Ti | 9.741600000  | 6.494389931 | 5.914800000  |
| Ti | 3.234796086  | 9.738040681 | 1.478954691  |
| Ti | 3.235015077  | 9.748162366 | 4.437227361  |
| Ti | -0.014220398 | 9.763374720 | 2.959580550  |
| Ti | -0.011873192 | 9.769370150 | 0.005400094  |
| Ti | 3.234445388  | 9.740069518 | 7.393120270  |
| Ti | 3.236436181  | 9.747423341 | 10.350066013 |
| Ti | -0.011942292 | 9.763716551 | 8.880202133  |
| Ti | -0.012528607 | 9.738847215 | 5.919377937  |
| Ti | 9.728005662  | 9.743662847 | 1.480283510  |
| Ti | 9.727868111  | 9.743218860 | 4.438572860  |
| Ti | 6.483744638  | 9.774047192 | 2.959559848  |
| Ti | 6.479960871  | 9.774658701 | 0.003740638  |

|    |              |              |              |
|----|--------------|--------------|--------------|
| Ti | 9.730118680  | 9.748214159  | 7.392869482  |
| Ti | 9.729169978  | 9.739238695  | 10.350621650 |
| Ti | 6.486076777  | 9.781272069  | 8.877925172  |
| Ti | 6.479339227  | 9.740451711  | 5.920089251  |
| Ti | -0.027358959 | 13.139103878 | 1.431884831  |
| Ti | -0.025794458 | 13.020641900 | 4.410937376  |
| Ti | 3.220098219  | 12.998591506 | 2.964964911  |
| Ti | 3.220735450  | 13.007446954 | 5.923622279  |
| Ti | 6.466441738  | 13.138999578 | 1.432490625  |
| Ti | 6.468023904  | 13.039480087 | 4.415074542  |
| Ti | 9.713931648  | 13.000114920 | 2.964787112  |
| Ti | 9.715918804  | 13.011030282 | 5.922775161  |
| Ti | -0.024946419 | 13.018937748 | 7.426371028  |
| Ti | -0.026730691 | 13.139908984 | 10.404650272 |
| Ti | 3.222208380  | 13.001928373 | 8.881747907  |
| Ti | 3.219086522  | 13.001369728 | 0.007224218  |
| Ti | 6.469004168  | 13.034531938 | 7.414712957  |
| Ti | 6.469637762  | 13.154945957 | 10.398919895 |
| Ti | 9.715683837  | 13.001651551 | 8.880844125  |
| Ti | 9.713740193  | 13.000379955 | 0.007376584  |
| Ti | 9.695891244  | 16.315284343 | 1.478657650  |
| Ti | 9.693653403  | 16.325303516 | 4.437690490  |

|    |              |              |              |
|----|--------------|--------------|--------------|
| Ti | 6.444729140  | 16.357403443 | 2.934654518  |
| Ti | -0.044629647 | 16.284014168 | 5.918269622  |
| Ti | 3.200423305  | 16.316484501 | 1.478274844  |
| Ti | 3.200011300  | 16.320033538 | 4.437583077  |
| Ti | -0.048533560 | 16.340172967 | 2.938048667  |
| Ti | 6.450074291  | 16.312831521 | 5.925242579  |
| Ti | 3.200280947  | 16.320340007 | 7.403233986  |
| Ti | 3.209252052  | 16.333117398 | 10.359225199 |
| Ti | -0.038591024 | 16.340388710 | 8.906099138  |
| Ti | 6.451653080  | 16.777556448 | 0.003126800  |
| Ti | 9.705936782  | 16.323516853 | 7.401599609  |
| Ti | 9.700206253  | 16.329681948 | 10.358669208 |
| Ti | 6.454888070  | 16.365025158 | 8.891903263  |
| Ti | -0.044519372 | 16.773455196 | 0.006175524  |
| Ti | 6.458600010  | 19.742791726 | 7.584079824  |
| Ti | 6.444468455  | 20.113003890 | 10.410299379 |
| Ti | 3.213183762  | 19.587065572 | 8.877486175  |
| Ti | 3.197664224  | 19.581570922 | 0.008638565  |
| Ti | 6.435802328  | 20.121298907 | 1.549733081  |
| Ti | 6.417364986  | 19.500811393 | 4.424087278  |
| Ti | 3.177951642  | 19.567165817 | 2.959163438  |
| Ti | 3.154591155  | 19.545519404 | 5.925752908  |

|    |              |              |              |
|----|--------------|--------------|--------------|
| Ti | -0.060338172 | 20.127521867 | 1.457322020  |
| Ti | -0.069791160 | 19.618421116 | 4.233096375  |
| Ti | 9.684248473  | 19.564654416 | 2.964217990  |
| Ti | 9.694948257  | 19.553736911 | 5.922165819  |
| Ti | -0.060000982 | 19.597851630 | 7.606764029  |
| Ti | -0.047019586 | 20.122869828 | 10.376722006 |
| Ti | 9.693848235  | 19.581296600 | 8.884393242  |
| Ti | 9.685357457  | 19.577893653 | 0.011068129  |
| O  | 0.000000000  | 1.266689833  | 2.957400000  |
| O  | 0.000000000  | 1.266689833  | 0.000000000  |
| O  | 0.000000000  | 1.266689833  | 8.872200000  |
| O  | 0.000000000  | 1.266689833  | 5.914800000  |
| O  | 6.494400000  | 1.266689833  | 2.957400000  |
| O  | 6.494400000  | 1.266689833  | 0.000000000  |
| O  | 6.494400000  | 1.266689833  | 8.872200000  |
| O  | 6.494400000  | 1.266689833  | 5.914800000  |
| O  | 9.741600000  | 1.980499953  | 8.872200000  |
| O  | 9.741600000  | 1.980499953  | 5.914800000  |
| O  | 9.741600000  | 1.980499953  | 2.957400000  |
| O  | 9.741600000  | 1.980499953  | 0.000000000  |
| O  | 3.247200000  | 1.980499953  | 8.872200000  |
| O  | 3.247200000  | 1.980499953  | 5.914800000  |



|   |              |             |              |
|---|--------------|-------------|--------------|
| O | 3.247200000  | 1.980499953 | 2.957400000  |
| O | 3.247200000  | 1.980499953 | 0.000000000  |
| O | 1.266699988  | 3.247190143 | 1.478700000  |
| O | 1.266699988  | 3.247190143 | 4.436100000  |
| O | 5.227599998  | 3.247190143 | 1.478700000  |
| O | 5.227599998  | 3.247190143 | 4.436100000  |
| O | 1.266699988  | 3.247190143 | 7.393500000  |
| O | 1.266699988  | 3.247190143 | 10.350900000 |
| O | 5.227599998  | 3.247190143 | 7.393500000  |
| O | 5.227599998  | 3.247190143 | 10.350900000 |
| O | 7.761099988  | 3.247190143 | 1.478700000  |
| O | 7.761099988  | 3.247190143 | 4.436100000  |
| O | 11.721999998 | 3.247190143 | 1.478700000  |
| O | 11.721999998 | 3.247190143 | 4.436100000  |
| O | 7.761099988  | 3.247190143 | 7.393500000  |
| O | 7.761099988  | 3.247190143 | 10.350900000 |
| O | 11.721999998 | 3.247190143 | 7.393500000  |
| O | 11.721999998 | 3.247190143 | 10.350900000 |
| O | 9.741600000  | 4.513899978 | 8.872200000  |
| O | 9.741600000  | 4.513899978 | 5.914800000  |
| O | 9.741600000  | 4.513899978 | 2.957400000  |
| O | 9.741600000  | 4.513899978 | 0.000000000  |

|   |              |             |              |
|---|--------------|-------------|--------------|
| O | 3.247200000  | 4.513899978 | 8.872200000  |
| O | 3.247200000  | 4.513899978 | 5.914800000  |
| O | 3.247200000  | 4.513899978 | 2.957400000  |
| O | 3.247200000  | 4.513899978 | 0.000000000  |
| O | 0.000000000  | 5.227600085 | 2.957400000  |
| O | 0.000000000  | 5.227600085 | 0.000000000  |
| O | 0.000000000  | 5.227600085 | 8.872200000  |
| O | 0.000000000  | 5.227600085 | 5.914800000  |
| O | 6.494400000  | 5.227600085 | 0.000000000  |
| O | 6.494400000  | 5.227600085 | 2.957400000  |
| O | 6.494400000  | 5.227600085 | 8.872200000  |
| O | 6.494400000  | 5.227600085 | 5.914800000  |
| O | 8.474900012  | 6.494389931 | 7.393500000  |
| O | 11.008299988 | 6.494389931 | 7.393500000  |
| O | 8.474900012  | 6.494389931 | 10.350900000 |
| O | 11.008299988 | 6.494389931 | 10.350900000 |
| O | 8.474900012  | 6.494389931 | 1.478700000  |
| O | 11.008299988 | 6.494389931 | 1.478700000  |
| O | 8.474900012  | 6.494389931 | 4.436100000  |
| O | 11.008299988 | 6.494389931 | 4.436100000  |
| O | 1.980500012  | 6.494389931 | 1.478700000  |
| O | 4.513899988  | 6.494389931 | 1.478700000  |

|   |             |             |              |
|---|-------------|-------------|--------------|
| O | 1.980500012 | 6.494389931 | 4.436100000  |
| O | 4.513899988 | 6.494389931 | 4.436100000  |
| O | 1.980500012 | 6.494389931 | 7.393500000  |
| O | 4.513899988 | 6.494389931 | 7.393500000  |
| O | 1.980500012 | 6.494389931 | 10.350900000 |
| O | 4.513899988 | 6.494389931 | 10.350900000 |
| O | 0.000000000 | 7.761090122 | 8.872200000  |
| O | 0.000000000 | 7.761090122 | 5.914800000  |
| O | 6.494400000 | 7.761090122 | 2.957400000  |
| O | 6.494400000 | 7.761090122 | 0.000000000  |
| O | 0.000000000 | 7.761090122 | 2.957400000  |
| O | 0.000000000 | 7.761090122 | 0.000000000  |
| O | 6.494400000 | 7.761090122 | 8.872200000  |
| O | 6.494400000 | 7.761090122 | 5.914800000  |
| O | 3.247200000 | 8.474889884 | 2.957400000  |
| O | 3.247200000 | 8.474889884 | 0.000000000  |
| O | 3.247200000 | 8.474889884 | 8.872200000  |
| O | 3.247200000 | 8.474889884 | 5.914800000  |
| O | 9.741600000 | 8.474889884 | 2.957400000  |
| O | 9.741600000 | 8.474889884 | 0.000000000  |
| O | 9.741600000 | 8.474889884 | 8.872200000  |
| O | 9.741600000 | 8.474889884 | 5.914800000  |

|   |              |              |              |
|---|--------------|--------------|--------------|
| O | 1.265487224  | 9.784464631  | 1.481964023  |
| O | 1.265467741  | 9.782029669  | 4.440584483  |
| O | 5.211070061  | 9.780999176  | 1.481478536  |
| O | 5.211231512  | 9.776457866  | 4.440618197  |
| O | 1.265364740  | 9.782513304  | 7.394006898  |
| O | 1.266296166  | 9.784241030  | 10.352993839 |
| O | 5.211599095  | 9.777176532  | 7.394705436  |
| O | 5.211336592  | 9.780660203  | 10.351712102 |
| O | 7.760035296  | 9.786333091  | 1.480811229  |
| O | 7.759546788  | 9.784382120  | 4.441314843  |
| O | 11.705021298 | 9.776693254  | 1.481399633  |
| O | 11.705431615 | 9.775814924  | 4.441062872  |
| O | 7.760432494  | 9.782790483  | 7.392838252  |
| O | 7.760812416  | 9.788162259  | 10.353415919 |
| O | 11.705902718 | 9.775167339  | 7.394111472  |
| O | 11.705495649 | 9.779015702  | 10.352891513 |
| O | 9.732998167  | 11.073081270 | 2.961427151  |
| O | 9.732396136  | 11.074358224 | 0.002083311  |
| O | 3.237137836  | 11.072551558 | 2.961031924  |
| O | 3.237573611  | 11.074553607 | 0.002397032  |
| O | 3.238169667  | 11.074126765 | 8.870369133  |
| O | 3.238076147  | 11.075972364 | 5.918019662  |

|   |              |              |              |
|---|--------------|--------------|--------------|
| O | 9.732145323  | 11.074048183 | 8.871062939  |
| O | 9.731641617  | 11.077168235 | 5.917289184  |
| O | 6.470655434  | 11.803370697 | 8.868815670  |
| O | -0.025811603 | 11.796834125 | 2.964383486  |
| O | 6.469168477  | 11.805128071 | 0.002598727  |
| O | 6.468437467  | 11.804504417 | 5.919712833  |
| O | -0.025892264 | 11.799794513 | 0.004752305  |
| O | -0.025593132 | 11.801151834 | 5.918824548  |
| O | 6.469535150  | 11.801688333 | 2.966110134  |
| O | -0.025554685 | 11.796326201 | 8.872262579  |
| O | 8.446612743  | 13.094953083 | 1.488456226  |
| O | 8.443415420  | 13.100271638 | 4.443123825  |
| O | 10.984212778 | 13.110861957 | 1.486978946  |
| O | 10.989160082 | 13.114079165 | 4.443240583  |
| O | 1.951814507  | 13.094101900 | 1.487582255  |
| O | 1.946929159  | 13.098164933 | 4.443664438  |
| O | 4.489149050  | 13.111036265 | 1.487683871  |
| O | 4.492486263  | 13.112898295 | 4.443265307  |
| O | 1.947453387  | 13.099780502 | 7.396557833  |
| O | 1.951622792  | 13.090174241 | 10.351257964 |
| O | 4.493118558  | 13.123791868 | 7.397349588  |
| O | 4.490229199  | 13.110061494 | 10.351224368 |

|   |              |              |              |
|---|--------------|--------------|--------------|
| O | 8.444014074  | 13.107319706 | 7.396772067  |
| O | 8.447476499  | 13.094258706 | 10.349825281 |
| O | 10.989896287 | 13.115775102 | 7.395828657  |
| O | 10.984986001 | 13.107602957 | 10.351990216 |
| O | -0.026552225 | 14.415830742 | 2.969514338  |
| O | -0.026101383 | 14.420620657 | 5.919655578  |
| O | -0.024024344 | 14.415462837 | 8.871025202  |
| O | -0.021732600 | 14.383657948 | 0.003293124  |
| O | 6.466874525  | 14.425131606 | 2.968329841  |
| O | 6.469473194  | 14.419920922 | 5.916016793  |
| O | 6.470131856  | 14.429193925 | 8.875353062  |
| O | 6.473080573  | 14.390659938 | 0.004947612  |
| O | 9.702843889  | 15.117156367 | 8.885432236  |
| O | 3.193840191  | 15.117456764 | 8.888411639  |
| O | 9.701743088  | 15.114461371 | 5.918622617  |
| O | 9.698442504  | 15.111854600 | 2.960226328  |
| O | 3.198739826  | 15.110320827 | 2.959161309  |
| O | 9.688739611  | 15.111175225 | -0.000577521 |
| O | 3.204569200  | 15.112209646 | -0.002588316 |
| O | 3.194234661  | 15.112109990 | 5.918777348  |
| O | 1.239926694  | 16.477781387 | 10.375617239 |
| O | 5.165866310  | 16.462816208 | 4.437961979  |

|   |              |              |              |
|---|--------------|--------------|--------------|
| O | 5.167499522  | 16.439873554 | 7.405915875  |
| O | 7.730596051  | 16.481362214 | 1.471702082  |
| O | 7.731131450  | 16.482226970 | 4.434390031  |
| O | 5.174058866  | 16.479992391 | 10.369384223 |
| O | 11.665381819 | 16.451760114 | 1.461695305  |
| O | 11.668057382 | 16.466551341 | 4.441364054  |
| O | 1.230528648  | 16.480723201 | 4.438525305  |
| O | 1.234855997  | 16.468519099 | 1.465448837  |
| O | 5.169035837  | 16.461280292 | 1.464100144  |
| O | 7.736145776  | 16.461410309 | 7.405466823  |
| O | 7.731494357  | 16.495302615 | 10.367592275 |
| O | 1.232263302  | 16.483066366 | 7.400993578  |
| O | 11.671419792 | 16.468482666 | 7.401651896  |
| O | 11.666907483 | 16.455540610 | 10.377457807 |
| O | 3.216376928  | 17.758689514 | 8.871342236  |
| O | 3.206055898  | 17.753303093 | 0.009958276  |
| O | 9.718492925  | 17.738474361 | 2.954829783  |
| O | 9.711401040  | 17.732562513 | 5.926882872  |
| O | 3.187734676  | 17.739857756 | 2.955446933  |
| O | 3.192874084  | 17.727396121 | 5.927238824  |
| O | 9.704516586  | 17.753220939 | 8.878334121  |
| O | 9.703419163  | 17.749709050 | 0.008568061  |

|   |              |              |              |
|---|--------------|--------------|--------------|
| O | 6.435698677  | 18.621309167 | 0.018581699  |
| O | 6.424186963  | 18.509566643 | 5.979500459  |
| O | -0.058732756 | 18.623610540 | 0.006426785  |
| O | 6.412310394  | 18.496712456 | 2.891155660  |
| O | -0.058134751 | 18.709241066 | 5.915036119  |
| O | 6.433181837  | 18.518936801 | 8.914346735  |
| O | -0.061557300 | 18.453972560 | 8.987967896  |
| O | -0.067811797 | 18.462407953 | 2.861769987  |
| O | 1.935258073  | 19.959115834 | 4.449894260  |
| O | 4.419714173  | 19.986298688 | 1.507510399  |
| O | 4.421944480  | 19.877550842 | 4.454601968  |
| O | 1.938773622  | 19.933666422 | 7.403794000  |
| O | 1.971804660  | 19.963850027 | 10.352253661 |
| O | 4.433779874  | 19.997500872 | 7.357137229  |
| O | 4.428352894  | 19.988022843 | 10.363968632 |
| O | 8.449433002  | 19.948864846 | 1.503194488  |
| O | 8.430753678  | 19.828529051 | 4.453137936  |
| O | 10.910346382 | 19.983958023 | 1.481188001  |
| O | 10.923809403 | 19.974670019 | 4.453008402  |
| O | 8.446995393  | 19.938685295 | 7.384721845  |
| O | 8.454880374  | 19.969006418 | 10.362045139 |
| O | 10.936251245 | 19.946002327 | 7.398268867  |



|   |              |              |              |
|---|--------------|--------------|--------------|
| O | 10.914342906 | 19.978579817 | 10.362132323 |
| O | 1.957831049  | 19.964737286 | 1.476828794  |
| O | 6.471487237  | 21.148012242 | 3.093889807  |
| O | 6.471975356  | 21.381356084 | 5.479367211  |
| O | -0.054561922 | 21.070996418 | 3.041136770  |
| O | -0.050097282 | 21.059106644 | 8.790742202  |
| O | -0.046972696 | 21.264562897 | 0.000979727  |
| O | 6.441644560  | 21.110016183 | 8.841629238  |
| O | 6.445185826  | 21.224183311 | 0.059069925  |
| H | 0.000000000  | 0.932899949  | 9.814800036  |
| H | 0.816399984  | 0.932899949  | 8.400899982  |
| H | 6.457700016  | 0.932899949  | 6.856699960  |
| H | 0.834099951  | 0.932899949  | -0.439200043 |
| H | 0.000000000  | 0.932899949  | 3.900000036  |
| H | 0.816399984  | 0.932899949  | 2.486099982  |
| H | 6.457700016  | 0.932899949  | 0.941899960  |
| H | 0.834099951  | 0.932899949  | 5.475599957  |
| H | 6.494400000  | 0.932899949  | 9.814800036  |
| H | 7.310799984  | 0.932899949  | 8.400899982  |
| H | -0.036699984 | 0.932899949  | 6.856699960  |
| H | 7.328499951  | 0.932899949  | -0.439200043 |
| H | 6.494400000  | 0.932899949  | 3.900000036  |

|   |              |              |             |
|---|--------------|--------------|-------------|
| H | 7.310799984  | 0.932899949  | 2.486099982 |
| H | -0.036699984 | 0.932899949  | 0.941899960 |
| H | 7.328499951  | 0.932899949  | 5.475599957 |
| H | 5.589389903  | 21.717161589 | 5.729226817 |
| H | 6.524343470  | 21.572862649 | 4.218631731 |

TS6-2:

|    |             |             |              |
|----|-------------|-------------|--------------|
| Ti | 3.247200000 | 3.247190143 | 1.478700000  |
| Ti | 3.247200000 | 3.247190143 | 4.436100000  |
| Ti | 0.000000000 | 3.247190143 | 2.957400000  |
| Ti | 0.000000000 | 3.247190143 | 0.000000000  |
| Ti | 3.247200000 | 3.247190143 | 7.393500000  |
| Ti | 3.247200000 | 3.247190143 | 10.350900000 |
| Ti | 0.000000000 | 3.247190143 | 8.872200000  |
| Ti | 0.000000000 | 3.247190143 | 5.914800000  |
| Ti | 9.741600000 | 3.247190143 | 1.478700000  |
| Ti | 9.741600000 | 3.247190143 | 4.436100000  |
| Ti | 6.494400000 | 3.247190143 | 2.957400000  |
| Ti | 6.494400000 | 3.247190143 | 0.000000000  |
| Ti | 9.741600000 | 3.247190143 | 7.393500000  |
| Ti | 9.741600000 | 3.247190143 | 10.350900000 |
| Ti | 6.494400000 | 3.247190143 | 8.872200000  |
| Ti | 6.494400000 | 3.247190143 | 5.914800000  |

|    |              |             |              |
|----|--------------|-------------|--------------|
| Ti | 0.000000000  | 6.494389931 | 4.436100000  |
| Ti | 0.000000000  | 6.494389931 | 1.478700000  |
| Ti | 3.247200000  | 6.494389931 | 2.957400000  |
| Ti | 3.247200000  | 6.494389931 | 0.000000000  |
| Ti | 0.000000000  | 6.494389931 | 10.350900000 |
| Ti | 0.000000000  | 6.494389931 | 7.393500000  |
| Ti | 3.247200000  | 6.494389931 | 8.872200000  |
| Ti | 3.247200000  | 6.494389931 | 5.914800000  |
| Ti | 6.494400000  | 6.494389931 | 4.436100000  |
| Ti | 6.494400000  | 6.494389931 | 1.478700000  |
| Ti | 9.741600000  | 6.494389931 | 2.957400000  |
| Ti | 9.741600000  | 6.494389931 | 0.000000000  |
| Ti | 6.494400000  | 6.494389931 | 10.350900000 |
| Ti | 6.494400000  | 6.494389931 | 7.393500000  |
| Ti | 9.741600000  | 6.494389931 | 8.872200000  |
| Ti | 9.741600000  | 6.494389931 | 5.914800000  |
| Ti | 3.242483247  | 9.743888948 | 1.480575228  |
| Ti | 3.234624763  | 9.746617878 | 4.437142779  |
| Ti | -0.014254688 | 9.761698786 | 2.953720285  |
| Ti | -0.004728573 | 9.773211368 | 0.001461429  |
| Ti | 3.234330957  | 9.742695577 | 7.392389910  |
| Ti | 3.242641970  | 9.741287893 | 10.351733277 |

|    |              |              |              |
|----|--------------|--------------|--------------|
| Ti | -0.012439634 | 9.763093969  | 8.879007462  |
| Ti | -0.012333255 | 9.738007462  | 5.916158866  |
| Ti | 9.727812389  | 9.742266592  | 1.479119478  |
| Ti | 9.727303747  | 9.741637939  | 4.436673262  |
| Ti | 6.483173780  | 9.808928199  | 2.961829475  |
| Ti | 6.484675935  | 9.762124199  | 0.000485487  |
| Ti | 9.728054110  | 9.741872255  | 7.393506506  |
| Ti | 9.728534956  | 9.740600660  | 10.351090457 |
| Ti | 6.483962330  | 9.836435381  | 8.873147314  |
| Ti | 6.478581850  | 9.751691044  | 5.919703842  |
| Ti | -0.023789117 | 13.144918927 | 1.430060589  |
| Ti | -0.023806003 | 13.017232881 | 4.407385184  |
| Ti | 3.222235007  | 13.005137365 | 2.966301892  |
| Ti | 3.221151221  | 13.010284112 | 5.923100712  |
| Ti | 6.468299006  | 13.103150944 | 1.456156095  |
| Ti | 6.469895590  | 13.095594596 | 4.477768583  |
| Ti | 9.716178710  | 12.998490421 | 2.966558240  |
| Ti | 9.720327723  | 13.002819918 | 5.924613718  |
| Ti | -0.022510889 | 13.017979765 | 7.425697924  |
| Ti | -0.024305032 | 13.145293262 | 10.403052093 |
| Ti | 3.224445960  | 12.998497208 | 8.882104214  |
| Ti | 3.222206302  | 13.004409055 | 0.009051892  |

|    |              |              |              |
|----|--------------|--------------|--------------|
| Ti | 6.470698557  | 13.124871295 | 7.398890394  |
| Ti | 6.471454765  | 13.162045818 | 10.400249306 |
| Ti | 9.717161833  | 12.998721166 | 8.882203583  |
| Ti | 9.717089355  | 12.999755587 | 0.009798221  |
| Ti | 9.709009282  | 16.319172354 | 1.473852467  |
| Ti | 9.710685877  | 16.317389263 | 4.432607429  |
| Ti | 6.459853689  | 16.339237130 | 2.943993514  |
| Ti | -0.036463718 | 16.281403111 | 5.918201128  |
| Ti | 3.215412640  | 16.339627896 | 1.482595724  |
| Ti | 3.210995928  | 16.335609154 | 4.436418571  |
| Ti | -0.031789828 | 16.345541172 | 2.937906712  |
| Ti | 6.456118240  | 16.524523593 | 5.918323328  |
| Ti | 3.202450726  | 16.319662418 | 7.402478075  |
| Ti | 3.211776295  | 16.322479574 | 10.361065767 |
| Ti | -0.034433569 | 16.344158490 | 8.903387557  |
| Ti | 6.459691718  | 16.706314240 | 0.002914222  |
| Ti | 9.711070735  | 16.319246649 | 7.399439642  |
| Ti | 9.706839633  | 16.326841217 | 10.356954153 |
| Ti | 6.456034722  | 16.415808252 | 8.882799085  |
| Ti | -0.035927281 | 16.779391689 | 0.004793591  |
| Ti | 6.434411487  | 19.787339002 | 7.527845337  |
| Ti | 6.445789806  | 20.057348371 | 10.375660891 |

|    |              |              |              |
|----|--------------|--------------|--------------|
| Ti | 3.201876232  | 19.574228529 | 8.911291031  |
| Ti | 3.205458673  | 19.582084561 | 0.016124691  |
| Ti | 6.457697028  | 20.051889083 | 1.481283940  |
| Ti | 6.618279511  | 19.633363434 | 4.296412061  |
| Ti | 3.215277556  | 19.627125830 | 2.962214056  |
| Ti | 3.108912663  | 19.556046143 | 5.977032332  |
| Ti | -0.035445136 | 20.133692320 | 1.466394613  |
| Ti | -0.029824493 | 19.614239853 | 4.238256683  |
| Ti | 9.762814347  | 19.570591266 | 2.935624427  |
| Ti | 9.762148931  | 19.551712360 | 5.936624902  |
| Ti | -0.059646388 | 19.615244627 | 7.620611167  |
| Ti | -0.051850640 | 20.134359193 | 10.387609615 |
| Ti | 9.675414530  | 19.581654861 | 8.876641187  |
| Ti | 9.694150874  | 19.575465120 | -0.005097493 |
| O  | 0.000000000  | 1.266689833  | 2.957400000  |
| O  | 0.000000000  | 1.266689833  | 0.000000000  |
| O  | 0.000000000  | 1.266689833  | 8.872200000  |
| O  | 0.000000000  | 1.266689833  | 5.914800000  |
| O  | 6.494400000  | 1.266689833  | 2.957400000  |
| O  | 6.494400000  | 1.266689833  | 0.000000000  |
| O  | 6.494400000  | 1.266689833  | 8.872200000  |
| O  | 6.494400000  | 1.266689833  | 5.914800000  |

|   |              |             |              |
|---|--------------|-------------|--------------|
| O | 9.741600000  | 1.980499953 | 8.872200000  |
| O | 9.741600000  | 1.980499953 | 5.914800000  |
| O | 9.741600000  | 1.980499953 | 2.957400000  |
| O | 9.741600000  | 1.980499953 | 0.000000000  |
| O | 3.247200000  | 1.980499953 | 8.872200000  |
| O | 3.247200000  | 1.980499953 | 5.914800000  |
| O | 3.247200000  | 1.980499953 | 2.957400000  |
| O | 3.247200000  | 1.980499953 | 0.000000000  |
| O | 1.266699988  | 3.247190143 | 1.478700000  |
| O | 1.266699988  | 3.247190143 | 4.436100000  |
| O | 5.227599998  | 3.247190143 | 1.478700000  |
| O | 5.227599998  | 3.247190143 | 4.436100000  |
| O | 1.266699988  | 3.247190143 | 7.393500000  |
| O | 1.266699988  | 3.247190143 | 10.350900000 |
| O | 5.227599998  | 3.247190143 | 7.393500000  |
| O | 5.227599998  | 3.247190143 | 10.350900000 |
| O | 7.761099988  | 3.247190143 | 1.478700000  |
| O | 7.761099988  | 3.247190143 | 4.436100000  |
| O | 11.721999998 | 3.247190143 | 1.478700000  |
| O | 11.721999998 | 3.247190143 | 4.436100000  |
| O | 7.761099988  | 3.247190143 | 7.393500000  |
| O | 7.761099988  | 3.247190143 | 10.350900000 |

|   |              |             |              |
|---|--------------|-------------|--------------|
| O | 11.721999998 | 3.247190143 | 7.393500000  |
| O | 11.721999998 | 3.247190143 | 10.350900000 |
| O | 9.741600000  | 4.513899978 | 8.872200000  |
| O | 9.741600000  | 4.513899978 | 5.914800000  |
| O | 9.741600000  | 4.513899978 | 2.957400000  |
| O | 9.741600000  | 4.513899978 | 0.000000000  |
| O | 3.247200000  | 4.513899978 | 8.872200000  |
| O | 3.247200000  | 4.513899978 | 5.914800000  |
| O | 3.247200000  | 4.513899978 | 2.957400000  |
| O | 3.247200000  | 4.513899978 | 0.000000000  |
| O | 0.000000000  | 5.227600085 | 2.957400000  |
| O | 0.000000000  | 5.227600085 | 0.000000000  |
| O | 0.000000000  | 5.227600085 | 8.872200000  |
| O | 0.000000000  | 5.227600085 | 5.914800000  |
| O | 6.494400000  | 5.227600085 | 0.000000000  |
| O | 6.494400000  | 5.227600085 | 2.957400000  |
| O | 6.494400000  | 5.227600085 | 8.872200000  |
| O | 6.494400000  | 5.227600085 | 5.914800000  |
| O | 8.474900012  | 6.494389931 | 7.393500000  |
| O | 11.008299988 | 6.494389931 | 7.393500000  |
| O | 8.474900012  | 6.494389931 | 10.350900000 |
| O | 11.008299988 | 6.494389931 | 10.350900000 |



|   |              |             |              |
|---|--------------|-------------|--------------|
| O | 8.474900012  | 6.494389931 | 1.478700000  |
| O | 11.008299988 | 6.494389931 | 1.478700000  |
| O | 8.474900012  | 6.494389931 | 4.436100000  |
| O | 11.008299988 | 6.494389931 | 4.436100000  |
| O | 1.980500012  | 6.494389931 | 1.478700000  |
| O | 4.513899988  | 6.494389931 | 1.478700000  |
| O | 1.980500012  | 6.494389931 | 4.436100000  |
| O | 4.513899988  | 6.494389931 | 4.436100000  |
| O | 1.980500012  | 6.494389931 | 7.393500000  |
| O | 4.513899988  | 6.494389931 | 7.393500000  |
| O | 1.980500012  | 6.494389931 | 10.350900000 |
| O | 4.513899988  | 6.494389931 | 10.350900000 |
| O | 0.000000000  | 7.761090122 | 8.872200000  |
| O | 0.000000000  | 7.761090122 | 5.914800000  |
| O | 6.494400000  | 7.761090122 | 2.957400000  |
| O | 6.494400000  | 7.761090122 | 0.000000000  |
| O | 0.000000000  | 7.761090122 | 2.957400000  |
| O | 0.000000000  | 7.761090122 | 0.000000000  |
| O | 6.494400000  | 7.761090122 | 8.872200000  |
| O | 6.494400000  | 7.761090122 | 5.914800000  |
| O | 3.247200000  | 8.474889884 | 2.957400000  |
| O | 3.247200000  | 8.474889884 | 0.000000000  |

|   |              |             |              |
|---|--------------|-------------|--------------|
| O | 3.247200000  | 8.474889884 | 8.872200000  |
| O | 3.247200000  | 8.474889884 | 5.914800000  |
| O | 9.741600000  | 8.474889884 | 2.957400000  |
| O | 9.741600000  | 8.474889884 | 0.000000000  |
| O | 9.741600000  | 8.474889884 | 8.872200000  |
| O | 9.741600000  | 8.474889884 | 5.914800000  |
| O | 1.267362417  | 9.784690732 | 1.481122702  |
| O | 1.265403446  | 9.782601172 | 4.438624792  |
| O | 5.211439463  | 9.780601981 | 1.478754180  |
| O | 5.210329960  | 9.779856884 | 4.441107588  |
| O | 1.265737258  | 9.782819058 | 7.392991682  |
| O | 1.267919377  | 9.784545356 | 10.350924251 |
| O | 5.210112137  | 9.780096201 | 7.392253397  |
| O | 5.211727944  | 9.783039087 | 10.353455667 |
| O | 7.761949975  | 9.786195573 | 1.479283672  |
| O | 7.760720715  | 9.784381763 | 4.441846110  |
| O | 11.707006507 | 9.779117858 | 1.478585016  |
| O | 11.706191719 | 9.776538234 | 4.439212486  |
| O | 7.761323785  | 9.784914333 | 7.391013300  |
| O | 7.762277293  | 9.788732334 | 10.353060440 |
| O | 11.706574499 | 9.777575156 | 7.393203432  |
| O | 11.707176140 | 9.779735082 | 10.352765173 |

|   |              |              |             |
|---|--------------|--------------|-------------|
| O | 9.735458636  | 11.072063637 | 2.961074274 |
| O | 9.734271070  | 11.074215348 | 0.001395183 |
| O | 3.236317724  | 11.076859624 | 2.961085039 |
| O | 3.237256814  | 11.077780816 | 0.001592737 |
| O | 3.237281752  | 11.074611829 | 8.872084307 |
| O | 3.236698555  | 11.079326376 | 5.916361389 |
| O | 9.734808936  | 11.072979829 | 8.871340461 |
| O | 9.733638905  | 11.075359784 | 5.916759692 |
| O | 6.471698435  | 11.811668929 | 8.862350438 |
| O | -0.021280460 | 11.798267884 | 2.961641266 |
| O | 6.471042111  | 11.802967073 | 0.000623065 |
| O | 6.471007431  | 11.812947311 | 5.923958950 |
| O | -0.019840912 | 11.803607871 | 0.002129565 |
| O | -0.020801953 | 11.801531527 | 5.916888043 |
| O | 6.471555299  | 11.802586666 | 2.968804681 |
| O | -0.020082503 | 11.798817957 | 8.873350665 |
| O | 8.453527591  | 13.096423276 | 1.488446999 |
| O | 8.453017651  | 13.103652439 | 4.439494977 |
| O | 10.989587674 | 13.109508208 | 1.485544961 |
| O | 10.995073363 | 13.112285358 | 4.443733168 |
| O | 1.953724380  | 13.099991958 | 1.487148345 |
| O | 1.948760190  | 13.104957253 | 4.443466883 |

|   |              |              |              |
|---|--------------|--------------|--------------|
| O | 4.489104369  | 13.114973925 | 1.489792616  |
| O | 4.489508840  | 13.123124995 | 4.438380392  |
| O | 1.949169338  | 13.102156528 | 7.395324952  |
| O | 1.954464222  | 13.101756476 | 10.353091552 |
| O | 4.489210747  | 13.128313176 | 7.398693786  |
| O | 4.489514685  | 13.119374503 | 10.352117384 |
| O | 8.453779054  | 13.111723855 | 7.399478207  |
| O | 8.453261061  | 13.099106485 | 10.349724493 |
| O | 10.995217149 | 13.111653489 | 7.395096759  |
| O | 10.990035657 | 13.109172806 | 10.352679645 |
| O | -0.019740898 | 14.420458135 | 2.968701645  |
| O | -0.021100306 | 14.422457683 | 5.918476403  |
| O | -0.021972504 | 14.419663031 | 8.866773762  |
| O | -0.018832721 | 14.389300117 | 0.003382792  |
| O | 6.475751071  | 14.419517655 | 2.960514497  |
| O | 6.474277361  | 14.421235023 | 5.914519402  |
| O | 6.473256442  | 14.441913451 | 8.876843946  |
| O | 6.476212043  | 14.388865060 | 0.010662018  |
| O | 9.717068703  | 15.118531548 | 8.880203434  |
| O | 3.196133883  | 15.118219007 | 8.881684027  |
| O | 9.715831130  | 15.116180525 | 5.916311468  |
| O | 9.716074021  | 15.113054400 | 2.956569444  |

|   |              |              |              |
|---|--------------|--------------|--------------|
| O | 3.194085939  | 15.131905089 | 2.958203112  |
| O | 9.702215361  | 15.111601709 | -0.003475063 |
| O | 3.208586895  | 15.122446347 | 0.015397999  |
| O | 3.194255963  | 15.123449336 | 5.916449401  |
| O | 1.243640452  | 16.469493870 | 10.377899642 |
| O | 5.175117453  | 16.438120824 | 4.435573701  |
| O | 5.169472260  | 16.453176014 | 7.396134570  |
| O | 7.745548368  | 16.467992602 | 1.471485127  |
| O | 7.750110554  | 16.468378367 | 4.433614246  |
| O | 5.175774556  | 16.467740426 | 10.360878268 |
| O | 11.677976409 | 16.454582270 | 1.460506075  |
| O | 11.680924087 | 16.476019370 | 4.439974194  |
| O | 1.240851497  | 16.497696500 | 4.437928856  |
| O | 1.248456699  | 16.491358169 | 1.469743218  |
| O | 5.177677026  | 16.455949950 | 1.471104332  |
| O | 7.745565513  | 16.462245062 | 7.394274129  |
| O | 7.741636661  | 16.485077701 | 10.357443662 |
| O | 1.238567287  | 16.493253775 | 7.398561058  |
| O | 11.679650275 | 16.477288465 | 7.398753644  |
| O | 11.673784274 | 16.466712434 | 10.374489524 |
| O | 3.196912692  | 17.747112637 | 8.886919926  |
| O | 3.213858010  | 17.756619599 | 0.008940338  |

|   |              |              |              |
|---|--------------|--------------|--------------|
| O | 9.733835945  | 17.746526846 | 2.952877899  |
| O | 9.724428157  | 17.735789723 | 5.920398476  |
| O | 3.243862268  | 17.797539256 | 2.982794011  |
| O | 3.207231384  | 17.745073441 | 5.918652901  |
| O | 9.707215529  | 17.755395867 | 8.869379705  |
| O | 9.715323528  | 17.747658423 | 0.004164611  |
| O | 6.444169713  | 18.565861175 | -0.002328657 |
| O | 6.440346849  | 18.502054943 | 5.907258393  |
| O | -0.043416623 | 18.631607304 | 0.012152430  |
| O | 6.439031084  | 18.456322154 | 2.913075199  |
| O | -0.035579051 | 18.725294959 | 5.929135582  |
| O | 6.445871116  | 18.506968445 | 8.865257444  |
| O | -0.047371582 | 18.464345350 | 8.994010692  |
| O | -0.055042768 | 18.467454330 | 2.858994526  |
| O | 1.957595302  | 19.955811472 | 4.451246147  |
| O | 4.440999179  | 19.997499444 | 1.495286874  |
| O | 4.436250084  | 20.166796308 | 4.566735929  |
| O | 1.930474038  | 19.974648230 | 7.425293588  |
| O | 1.969260673  | 19.978900217 | 10.382295049 |
| O | 4.409261956  | 19.912006436 | 7.403839425  |
| O | 4.434180319  | 19.967490505 | 10.365133966 |
| O | 8.485524590  | 19.939010695 | 1.496095190  |

|   |              |              |              |
|---|--------------|--------------|--------------|
| O | 8.511951733  | 19.928178202 | 4.447659649  |
| O | 10.944192597 | 19.994814806 | 1.463704799  |
| O | 10.970374381 | 19.972058604 | 4.450935738  |
| O | 8.459186162  | 19.960742833 | 7.351121049  |
| O | 8.457651665  | 19.947735412 | 10.352258748 |
| O | 10.954746516 | 19.968101656 | 7.405068521  |
| O | 10.918597647 | 19.990736056 | 10.349439636 |
| O | 1.987251980  | 19.975874820 | 1.520134357  |
| O | 6.484580727  | 21.033538288 | 3.037504255  |
| O | 6.186958611  | 21.163288890 | 5.818207294  |
| O | -0.030468737 | 21.074792988 | 3.049849507  |
| O | -0.044929039 | 21.075957784 | 8.805729359  |
| O | -0.027700305 | 21.275021770 | 0.014382783  |
| O | 6.449920504  | 21.097337019 | 8.829898297  |
| O | 6.468777254  | 21.180031444 | 0.009437773  |
| H | 0.000000000  | 0.932899949  | 9.814800036  |
| H | 0.816399984  | 0.932899949  | 8.400899982  |
| H | 6.457700016  | 0.932899949  | 6.856699960  |
| H | 0.834099951  | 0.932899949  | -0.439200043 |
| H | 0.000000000  | 0.932899949  | 3.900000036  |
| H | 0.816399984  | 0.932899949  | 2.486099982  |
| H | 6.457700016  | 0.932899949  | 0.941899960  |

|   |              |              |              |
|---|--------------|--------------|--------------|
| H | 0.834099951  | 0.932899949  | 5.475599957  |
| H | 6.494400000  | 0.932899949  | 9.814800036  |
| H | 7.310799984  | 0.932899949  | 8.400899982  |
| H | -0.036699984 | 0.932899949  | 6.856699960  |
| H | 7.328499951  | 0.932899949  | -0.439200043 |
| H | 6.494400000  | 0.932899949  | 3.900000036  |
| H | 7.310799984  | 0.932899949  | 2.486099982  |
| H | -0.036699984 | 0.932899949  | 0.941899960  |
| H | 7.328499951  | 0.932899949  | 5.475599957  |
| H | 5.114800843  | 20.930265447 | 5.155241139  |
| H | 6.643093964  | 22.007439333 | 5.665506322  |

6-c:

|    |             |             |              |
|----|-------------|-------------|--------------|
| Ti | 3.247200000 | 3.247194072 | 1.478700000  |
| Ti | 3.247200000 | 3.247194072 | 4.436100000  |
| Ti | 0.000000000 | 3.247194072 | 2.957400000  |
| Ti | 0.000000000 | 3.247194072 | 0.000000000  |
| Ti | 3.247200000 | 3.247194072 | 7.393500000  |
| Ti | 3.247200000 | 3.247194072 | 10.350900000 |
| Ti | 0.000000000 | 3.247194072 | 8.872200000  |
| Ti | 0.000000000 | 3.247194072 | 5.914800000  |
| Ti | 9.741600000 | 3.247194072 | 1.478700000  |
| Ti | 9.741600000 | 3.247194072 | 4.436100000  |



|    |             |             |              |
|----|-------------|-------------|--------------|
| Ti | 6.494400000 | 3.247194072 | 2.957400000  |
| Ti | 6.494400000 | 3.247194072 | 0.000000000  |
| Ti | 9.741600000 | 3.247194072 | 7.393500000  |
| Ti | 9.741600000 | 3.247194072 | 10.350900000 |
| Ti | 6.494400000 | 3.247194072 | 8.872200000  |
| Ti | 6.494400000 | 3.247194072 | 5.914800000  |
| Ti | 0.000000000 | 6.494391717 | 4.436100000  |
| Ti | 0.000000000 | 6.494391717 | 1.478700000  |
| Ti | 3.247200000 | 6.494391717 | 2.957400000  |
| Ti | 3.247200000 | 6.494391717 | 0.000000000  |
| Ti | 0.000000000 | 6.494391717 | 10.350900000 |
| Ti | 0.000000000 | 6.494391717 | 7.393500000  |
| Ti | 3.247200000 | 6.494391717 | 8.872200000  |
| Ti | 3.247200000 | 6.494391717 | 5.914800000  |
| Ti | 6.494400000 | 6.494391717 | 4.436100000  |
| Ti | 6.494400000 | 6.494391717 | 1.478700000  |
| Ti | 9.741600000 | 6.494391717 | 2.957400000  |
| Ti | 9.741600000 | 6.494391717 | 0.000000000  |
| Ti | 6.494400000 | 6.494391717 | 10.350900000 |
| Ti | 6.494400000 | 6.494391717 | 7.393500000  |
| Ti | 9.741600000 | 6.494391717 | 8.872200000  |
| Ti | 9.741600000 | 6.494391717 | 5.914800000  |

|    |              |              |              |
|----|--------------|--------------|--------------|
| Ti | 3.237493470  | 9.749032838  | 1.478848225  |
| Ti | 3.234339399  | 9.740256329  | 4.437073339  |
| Ti | -0.013231171 | 9.763011101  | 2.957834620  |
| Ti | -0.010658220 | 9.771008937  | 0.004354121  |
| Ti | 3.235339018  | 9.748973901  | 7.393480363  |
| Ti | 3.236185757  | 9.740596373  | 10.352327951 |
| Ti | -0.012149724 | 9.764610954  | 8.879430488  |
| Ti | -0.012329748 | 9.739578025  | 5.919199428  |
| Ti | 9.728243747  | 9.741281463  | 1.476927216  |
| Ti | 9.729274278  | 9.747078653  | 4.436726614  |
| Ti | 6.484779845  | 9.793878367  | 2.964145238  |
| Ti | 6.481296119  | 9.767408821  | 0.007013533  |
| Ti | 9.727887594  | 9.739196547  | 7.393833950  |
| Ti | 9.729336884  | 9.749430390  | 10.351770067 |
| Ti | 6.484058058  | 9.794260917  | 8.880945742  |
| Ti | 6.478825260  | 9.742772730  | 5.922527686  |
| Ti | -0.027245437 | 13.142479321 | 1.430965790  |
| Ti | -0.026313880 | 13.020244348 | 4.410511511  |
| Ti | 3.220765844  | 13.001659052 | 2.964579384  |
| Ti | 3.219096004  | 13.009777260 | 5.920721306  |
| Ti | 6.467195348  | 13.134476128 | 1.440348673  |
| Ti | 6.469042355  | 13.069800138 | 4.434110261  |

|    |              |              |              |
|----|--------------|--------------|--------------|
| Ti | 9.714799819  | 13.000228507 | 2.965735491  |
| Ti | 9.717019216  | 13.006863663 | 5.923894242  |
| Ti | -0.024270092 | 13.022920414 | 7.425480850  |
| Ti | -0.026281278 | 13.141789587 | 10.403264789 |
| Ti | 3.221804298  | 13.000573552 | 8.881022161  |
| Ti | 3.219226801  | 13.008647826 | 0.007277097  |
| Ti | 6.467417976  | 13.059082660 | 7.407046430  |
| Ti | 6.468524102  | 13.146949908 | 10.401379742 |
| Ti | 9.714789298  | 13.001555467 | 8.880078040  |
| Ti | 9.713520422  | 13.009776188 | 0.008275633  |
| Ti | 9.695725377  | 16.328637525 | 1.478308440  |
| Ti | 9.696942557  | 16.320279642 | 4.433027380  |
| Ti | 6.445780843  | 16.361670432 | 2.941701529  |
| Ti | -0.045330912 | 16.287262808 | 5.917603615  |
| Ti | 3.202213811  | 16.328320697 | 1.478741758  |
| Ti | 3.198704886  | 16.324336960 | 4.433354350  |
| Ti | -0.047507056 | 16.341583867 | 2.937374498  |
| Ti | 6.453214464  | 16.381601262 | 5.917030826  |
| Ti | 3.201174967  | 16.323509352 | 7.400405529  |
| Ti | 3.207565456  | 16.327340212 | 10.360607370 |
| Ti | -0.040254629 | 16.341287399 | 8.902717056  |
| Ti | 6.452352007  | 16.747740749 | 0.003075696  |

|    |              |              |              |
|----|--------------|--------------|--------------|
| Ti | 9.703722321  | 16.321987366 | 7.402162461  |
| Ti | 9.699215467  | 16.329750171 | 10.360152758 |
| Ti | 6.452147174  | 16.363442093 | 8.891507208  |
| Ti | -0.044485861 | 16.775233286 | 0.005206325  |
| Ti | 6.429355337  | 19.654518711 | 7.551140895  |
| Ti | 6.432471999  | 20.095792345 | 10.366729306 |
| Ti | 3.187722726  | 19.582760364 | 8.877473399  |
| Ti | 3.184204190  | 19.579571016 | 0.003679360  |
| Ti | 6.430648502  | 20.099140285 | 1.471499204  |
| Ti | 6.427405978  | 19.655210587 | 4.287802833  |
| Ti | 3.186082111  | 19.582656421 | 2.959654840  |
| Ti | 3.156931867  | 19.551297662 | 5.919030147  |
| Ti | -0.062363645 | 20.127990143 | 1.457354670  |
| Ti | -0.067001296 | 19.610313623 | 4.228917095  |
| Ti | 9.676466234  | 19.582489257 | 2.958025076  |
| Ti | 9.707901338  | 19.548791262 | 5.917208388  |
| Ti | -0.063879828 | 19.607224646 | 7.603140977  |
| Ti | -0.060977870 | 20.126240270 | 10.376438687 |
| Ti | 9.678939561  | 19.582752148 | 8.875781648  |
| Ti | 9.682393153  | 19.582161356 | 0.002430510  |
| O  | 0.000000000  | 1.266694833  | 2.957400000  |
| O  | 0.000000000  | 1.266694833  | 0.000000000  |

|   |             |             |              |
|---|-------------|-------------|--------------|
| O | 0.000000000 | 1.266694833 | 8.872200000  |
| O | 0.000000000 | 1.266694833 | 5.914800000  |
| O | 6.494400000 | 1.266694833 | 2.957400000  |
| O | 6.494400000 | 1.266694833 | 0.000000000  |
| O | 6.494400000 | 1.266694833 | 8.872200000  |
| O | 6.494400000 | 1.266694833 | 5.914800000  |
| O | 9.741600000 | 1.980495667 | 8.872200000  |
| O | 9.741600000 | 1.980495667 | 5.914800000  |
| O | 9.741600000 | 1.980495667 | 2.957400000  |
| O | 9.741600000 | 1.980495667 | 0.000000000  |
| O | 3.247200000 | 1.980495667 | 8.872200000  |
| O | 3.247200000 | 1.980495667 | 5.914800000  |
| O | 3.247200000 | 1.980495667 | 2.957400000  |
| O | 3.247200000 | 1.980495667 | 0.000000000  |
| O | 1.266698949 | 3.247194072 | 1.478700000  |
| O | 1.266698949 | 3.247194072 | 4.436100000  |
| O | 5.227599738 | 3.247194072 | 1.478700000  |
| O | 5.227599738 | 3.247194072 | 4.436100000  |
| O | 1.266698949 | 3.247194072 | 7.393500000  |
| O | 1.266698949 | 3.247194072 | 10.350900000 |
| O | 5.227599738 | 3.247194072 | 7.393500000  |
| O | 5.227599738 | 3.247194072 | 10.350900000 |

|   |              |             |              |
|---|--------------|-------------|--------------|
| O | 7.761098949  | 3.247194072 | 1.478700000  |
| O | 7.761098949  | 3.247194072 | 4.436100000  |
| O | 11.721999738 | 3.247194072 | 1.478700000  |
| O | 11.721999738 | 3.247194072 | 4.436100000  |
| O | 7.761098949  | 3.247194072 | 7.393500000  |
| O | 7.761098949  | 3.247194072 | 10.350900000 |
| O | 11.721999738 | 3.247194072 | 7.393500000  |
| O | 11.721999738 | 3.247194072 | 10.350900000 |
| O | 9.741600000  | 4.513896049 | 8.872200000  |
| O | 9.741600000  | 4.513896049 | 5.914800000  |
| O | 9.741600000  | 4.513896049 | 2.957400000  |
| O | 9.741600000  | 4.513896049 | 0.000000000  |
| O | 3.247200000  | 4.513896049 | 8.872200000  |
| O | 3.247200000  | 4.513896049 | 5.914800000  |
| O | 3.247200000  | 4.513896049 | 2.957400000  |
| O | 3.247200000  | 4.513896049 | 0.000000000  |
| O | 0.000000000  | 5.227596870 | 2.957400000  |
| O | 0.000000000  | 5.227596870 | 0.000000000  |
| O | 0.000000000  | 5.227596870 | 8.872200000  |
| O | 0.000000000  | 5.227596870 | 5.914800000  |
| O | 6.494400000  | 5.227596870 | 0.000000000  |
| O | 6.494400000  | 5.227596870 | 2.957400000  |

|   |              |             |              |
|---|--------------|-------------|--------------|
| O | 6.494400000  | 5.227596870 | 8.872200000  |
| O | 6.494400000  | 5.227596870 | 5.914800000  |
| O | 8.474899752  | 6.494391717 | 7.393500000  |
| O | 11.008298949 | 6.494391717 | 7.393500000  |
| O | 8.474899752  | 6.494391717 | 10.350900000 |
| O | 11.008298949 | 6.494391717 | 10.350900000 |
| O | 8.474899752  | 6.494391717 | 1.478700000  |
| O | 11.008298949 | 6.494391717 | 1.478700000  |
| O | 8.474899752  | 6.494391717 | 4.436100000  |
| O | 11.008298949 | 6.494391717 | 4.436100000  |
| O | 1.980499752  | 6.494391717 | 1.478700000  |
| O | 4.513898949  | 6.494391717 | 1.478700000  |
| O | 1.980499752  | 6.494391717 | 4.436100000  |
| O | 4.513898949  | 6.494391717 | 4.436100000  |
| O | 1.980499752  | 6.494391717 | 7.393500000  |
| O | 4.513898949  | 6.494391717 | 7.393500000  |
| O | 1.980499752  | 6.494391717 | 10.350900000 |
| O | 4.513898949  | 6.494391717 | 10.350900000 |
| O | 0.000000000  | 7.761086550 | 8.872200000  |
| O | 0.000000000  | 7.761086550 | 5.914800000  |
| O | 6.494400000  | 7.761086550 | 2.957400000  |
| O | 6.494400000  | 7.761086550 | 0.000000000  |

|   |             |             |              |
|---|-------------|-------------|--------------|
| O | 0.000000000 | 7.761086550 | 2.957400000  |
| O | 0.000000000 | 7.761086550 | 0.000000000  |
| O | 6.494400000 | 7.761086550 | 8.872200000  |
| O | 6.494400000 | 7.761086550 | 5.914800000  |
| O | 3.247200000 | 8.474887384 | 2.957400000  |
| O | 3.247200000 | 8.474887384 | 0.000000000  |
| O | 3.247200000 | 8.474887384 | 8.872200000  |
| O | 3.247200000 | 8.474887384 | 5.914800000  |
| O | 9.741600000 | 8.474887384 | 2.957400000  |
| O | 9.741600000 | 8.474887384 | 0.000000000  |
| O | 9.741600000 | 8.474887384 | 8.872200000  |
| O | 9.741600000 | 8.474887384 | 5.914800000  |
| O | 1.266113544 | 9.784008143 | 1.481436541  |
| O | 1.265511383 | 9.782843347 | 4.440195171  |
| O | 5.211721839 | 9.782709401 | 1.483376359  |
| O | 5.211153709 | 9.780323016 | 4.442123159  |
| O | 1.265963523 | 9.782166830 | 7.394074445  |
| O | 1.266241743 | 9.785205086 | 10.352727082 |
| O | 5.211044993 | 9.778449556 | 7.394781146  |
| O | 5.211601953 | 9.782769766 | 10.353794112 |
| O | 7.760859566 | 9.790259678 | 1.482519660  |
| O | 7.760399113 | 9.785447617 | 4.443914397  |



|   |              |              |              |
|---|--------------|--------------|--------------|
| O | 11.705838684 | 9.779097141  | 1.481135715  |
| O | 11.705823876 | 9.774905877  | 4.440606486  |
| O | 7.759906707  | 9.786262724  | 7.392947321  |
| O | 7.760967632  | 9.788828775  | 10.354414692 |
| O | 11.706095992 | 9.777041514  | 7.393855243  |
| O | 11.705864012 | 9.778346328  | 10.353098176 |
| O | 9.733825814  | 11.074325005 | 2.962785780  |
| O | 9.733517459  | 11.077597220 | 0.002007128  |
| O | 3.236636339  | 11.074904724 | 2.963064722  |
| O | 3.236633871  | 11.076662098 | 0.001520695  |
| O | 3.237714020  | 11.074896866 | 8.871376660  |
| O | 3.237219146  | 11.078384824 | 5.917009651  |
| O | 9.733432253  | 11.075232981 | 8.870293897  |
| O | 9.732360157  | 11.077531140 | 5.917393167  |
| O | 6.469207833  | 11.807169053 | 8.865036467  |
| O | -0.025283089 | 11.798018566 | 2.963872802  |
| O | 6.469027418  | 11.804379401 | 0.003610394  |
| O | 6.468063390  | 11.815204036 | 5.919007316  |
| O | -0.024965383 | 11.802562734 | 0.003088945  |
| O | -0.024785358 | 11.802815267 | 5.918305110  |
| O | 6.469380844  | 11.808473867 | 2.974960805  |
| O | -0.024336725 | 11.799411963 | 8.872278667  |

|   |              |              |              |
|---|--------------|--------------|--------------|
| O | 8.448298819  | 13.096466496 | 1.489859926  |
| O | 8.446329977  | 13.107970148 | 4.443347996  |
| O | 10.985183691 | 13.112167485 | 1.486883954  |
| O | 10.990116318 | 13.116858101 | 4.443587900  |
| O | 1.951620714  | 13.095999649 | 1.487249252  |
| O | 1.946479747  | 13.102703386 | 4.443159669  |
| O | 4.488485972  | 13.113310492 | 1.488771367  |
| O | 4.489917338  | 13.125495306 | 4.442617991  |
| O | 1.947242189  | 13.101946144 | 7.395745140  |
| O | 1.952313017  | 13.097434837 | 10.351155993 |
| O | 4.490537034  | 13.127276611 | 7.396449238  |
| O | 4.489063195  | 13.113532307 | 10.350503827 |
| O | 8.446031495  | 13.110109715 | 7.396745924  |
| O | 8.447471693  | 13.096702598 | 10.349362152 |
| O | 10.990444545 | 13.117143138 | 7.395760518  |
| O | 10.985056401 | 13.112829715 | 10.351901612 |
| O | -0.026317907 | 14.417636336 | 2.968207523  |
| O | -0.026355314 | 14.423454243 | 5.918935983  |
| O | -0.024960577 | 14.418807919 | 8.868493077  |
| O | -0.022717022 | 14.387323429 | 0.003295372  |
| O | 6.468554236  | 14.429179637 | 2.964889320  |
| O | 6.469595548  | 14.443021454 | 5.918284172  |

|   |              |              |              |
|---|--------------|--------------|--------------|
| O | 6.469158345  | 14.428510264 | 8.874723017  |
| O | 6.472356578  | 14.388937212 | 0.007542316  |
| O | 9.703580354  | 15.119679913 | 8.881145425  |
| O | 3.193621200  | 15.119348798 | 8.879849493  |
| O | 9.703152892  | 15.119138056 | 5.918982000  |
| O | 9.701959741  | 15.116934909 | 2.956100164  |
| O | 3.194244273  | 15.117347821 | 2.957151697  |
| O | 9.691282688  | 15.113900583 | 0.002913039  |
| O | 3.203918591  | 15.112980819 | 0.003986339  |
| O | 3.192422204  | 15.119821717 | 5.918488351  |
| O | 1.236409457  | 16.474331291 | 10.374056560 |
| O | 5.165249212  | 16.460306236 | 4.436300985  |
| O | 5.166464184  | 16.460266588 | 7.400029348  |
| O | 7.731611516  | 16.479273725 | 1.471134734  |
| O | 7.734164334  | 16.475649321 | 4.434268305  |
| O | 5.169900241  | 16.462228631 | 10.367538806 |
| O | 11.664913573 | 16.457374779 | 1.461045268  |
| O | 11.667481069 | 16.472334243 | 4.437775190  |
| O | 1.229676453  | 16.487261917 | 4.437041163  |
| O | 1.235033554  | 16.473878017 | 1.463728695  |
| O | 5.168821781  | 16.463233763 | 1.468660337  |
| O | 7.735348783  | 16.475664323 | 7.401140029  |

|   |              |              |              |
|---|--------------|--------------|--------------|
| O | 7.732904161  | 16.479009762 | 10.365924775 |
| O | 1.231077295  | 16.488554943 | 7.397445053  |
| O | 11.669085835 | 16.473491895 | 7.399197254  |
| O | 11.666195048 | 16.458927126 | 10.374684239 |
| O | 3.201432145  | 17.755565175 | 8.875660513  |
| O | 3.200839985  | 17.751911481 | 0.003819186  |
| O | 9.700347571  | 17.754187494 | 2.960905465  |
| O | 9.702815833  | 17.733949124 | 5.917212529  |
| O | 3.200673599  | 17.755144763 | 2.961102665  |
| O | 3.196261953  | 17.736360512 | 5.917363356  |
| O | 9.701214833  | 17.756070956 | 8.875452785  |
| O | 9.702107683  | 17.753097351 | 0.004660153  |
| O | 6.431203383  | 18.594303122 | 0.003226760  |
| O | 6.432965963  | 18.572907814 | 5.917510753  |
| O | -0.062745256 | 18.626849180 | 0.003266153  |
| O | 6.429288055  | 18.478796533 | 2.911766608  |
| O | -0.064140513 | 18.710401932 | 5.916166082  |
| O | 6.430663309  | 18.476034384 | 8.926116833  |
| O | -0.062968144 | 18.460491273 | 8.982805932  |
| O | -0.065727355 | 18.462151134 | 2.852426022  |
| O | 1.931397672  | 19.951814519 | 4.445151182  |
| O | 4.411535126  | 19.974284611 | 1.485281989  |

|   |              |              |              |
|---|--------------|--------------|--------------|
| O | 4.419721966  | 19.971587828 | 4.465527786  |
| O | 1.931424559  | 19.950253599 | 7.390307664  |
| O | 1.957089388  | 19.971942518 | 10.353836225 |
| O | 4.420631052  | 19.971089549 | 7.371628962  |
| O | 4.411884394  | 19.975721585 | 10.352635284 |
| O | 8.450185313  | 19.959531960 | 1.484091458  |
| O | 8.442637651  | 19.957487406 | 4.464035246  |
| O | 10.905428822 | 19.990787134 | 1.483217133  |
| O | 10.930999093 | 19.964156853 | 4.444303000  |
| O | 8.443615448  | 19.958594694 | 7.370717255  |
| O | 8.451929449  | 19.960059887 | 10.351279848 |
| O | 10.933074833 | 19.962359117 | 7.388531450  |
| O | 10.907418187 | 19.988862953 | 10.352373732 |
| O | 1.956738171  | 19.971258142 | 1.483740001  |
| O | 6.436121462  | 21.071067142 | 3.029210049  |
| O | 6.438922627  | 21.378901833 | 5.918911141  |
| O | -0.057704303 | 21.070056295 | 3.042631558  |
| O | -0.057305806 | 21.067305934 | 8.790201708  |
| O | -0.055410481 | 21.267581864 | 0.001071762  |
| O | 6.436616855  | 21.067627048 | 8.808929858  |
| O | 6.436739989  | 21.226679353 | 0.003651324  |
| H | 0.000000000  | 0.932897449  | 9.814799089  |

|   |              |              |              |
|---|--------------|--------------|--------------|
| H | 0.816399334  | 0.932897449  | 8.400899272  |
| H | 6.457698847  | 0.932897449  | 6.856699960  |
| H | 0.834099172  | 0.932897449  | -0.439201108 |
| H | 0.000000000  | 0.932897449  | 3.899999089  |
| H | 0.816399334  | 0.932897449  | 2.486099272  |
| H | 6.457698847  | 0.932897449  | 0.941899960  |
| H | 0.834099172  | 0.932897449  | 5.475598892  |
| H | 6.494400000  | 0.932897449  | 9.814799089  |
| H | 7.310799334  | 0.932897449  | 8.400899272  |
| H | -0.036701153 | 0.932897449  | 6.856699960  |
| H | 7.328499172  | 0.932897449  | -0.439201108 |
| H | 6.494400000  | 0.932897449  | 3.899999089  |
| H | 7.310799334  | 0.932897449  | 2.486099272  |
| H | -0.036701153 | 0.932897449  | 0.941899960  |
| H | 7.328499172  | 0.932897449  | 5.475598892  |
| H | 5.653485735  | 21.955698613 | 5.919633929  |
| H | 7.235298817  | 21.941682845 | 5.921813770  |

7-Ba:

|    |             |             |             |
|----|-------------|-------------|-------------|
| Ti | 3.247200000 | 3.247194072 | 1.478700000 |
| Ti | 3.247200000 | 3.247194072 | 4.436100000 |
| Ti | 0.000000000 | 3.247194072 | 2.957400000 |
| Ti | 0.000000000 | 3.247194072 | 0.000000000 |

|    |             |             |              |
|----|-------------|-------------|--------------|
| Ti | 3.247200000 | 3.247194072 | 7.393500000  |
| Ti | 3.247200000 | 3.247194072 | 10.350900000 |
| Ti | 0.000000000 | 3.247194072 | 8.872200000  |
| Ti | 0.000000000 | 3.247194072 | 5.914800000  |
| Ti | 9.741600000 | 3.247194072 | 1.478700000  |
| Ti | 9.741600000 | 3.247194072 | 4.436100000  |
| Ti | 6.494400000 | 3.247194072 | 2.957400000  |
| Ti | 6.494400000 | 3.247194072 | 0.000000000  |
| Ti | 9.741600000 | 3.247194072 | 7.393500000  |
| Ti | 9.741600000 | 3.247194072 | 10.350900000 |
| Ti | 6.494400000 | 3.247194072 | 8.872200000  |
| Ti | 6.494400000 | 3.247194072 | 5.914800000  |
| Ti | 0.000000000 | 6.494391717 | 4.436100000  |
| Ti | 0.000000000 | 6.494391717 | 1.478700000  |
| Ti | 3.247200000 | 6.494391717 | 2.957400000  |
| Ti | 3.247200000 | 6.494391717 | 0.000000000  |
| Ti | 0.000000000 | 6.494391717 | 10.350900000 |
| Ti | 0.000000000 | 6.494391717 | 7.393500000  |
| Ti | 3.247200000 | 6.494391717 | 8.872200000  |
| Ti | 3.247200000 | 6.494391717 | 5.914800000  |
| Ti | 6.494400000 | 6.494391717 | 4.436100000  |
| Ti | 6.494400000 | 6.494391717 | 1.478700000  |

|    |              |             |              |
|----|--------------|-------------|--------------|
| Ti | 9.741600000  | 6.494391717 | 2.957400000  |
| Ti | 9.741600000  | 6.494391717 | 0.000000000  |
| Ti | 6.494400000  | 6.494391717 | 10.350900000 |
| Ti | 6.494400000  | 6.494391717 | 7.393500000  |
| Ti | 9.741600000  | 6.494391717 | 8.872200000  |
| Ti | 9.741600000  | 6.494391717 | 5.914800000  |
| Ti | 3.226037478  | 9.737360949 | 1.479876335  |
| Ti | 3.226714324  | 9.738387155 | 4.437565687  |
| Ti | -0.015192740 | 9.835272014 | 2.967391044  |
| Ti | -0.013376516 | 9.837001884 | 0.009220700  |
| Ti | 3.229991918  | 9.738384654 | 7.394282883  |
| Ti | 3.228157900  | 9.737781361 | 10.352008670 |
| Ti | -0.009593268 | 9.838058094 | 8.879986834  |
| Ti | -0.015903487 | 9.835101992 | 5.924024367  |
| Ti | 9.737241089  | 9.739369426 | 1.481951484  |
| Ti | 9.734098448  | 9.738686480 | 4.438565525  |
| Ti | 6.479380141  | 9.745849563 | 2.968504919  |
| Ti | 6.482178189  | 9.749895451 | 0.014221545  |
| Ti | 9.737484758  | 9.739055457 | 7.396780703  |
| Ti | 9.741547525  | 9.737583478 | 10.354411617 |
| Ti | 6.484972599  | 9.746441069 | 8.890389075  |
| Ti | 6.481251308  | 9.735344970 | 5.929791889  |



|    |              |              |              |
|----|--------------|--------------|--------------|
| Ti | -0.032605265 | 13.176781680 | 1.520621973  |
| Ti | -0.031281966 | 13.176459852 | 4.477562157  |
| Ti | 3.212286755  | 12.993117573 | 2.963763024  |
| Ti | 3.213671101  | 12.995745418 | 5.921300602  |
| Ti | 6.461403512  | 13.089219830 | 1.467101550  |
| Ti | 6.461612242  | 13.018239799 | 4.427815968  |
| Ti | 9.713742401  | 12.997383848 | 2.968295653  |
| Ti | 9.709396608  | 12.996145828 | 5.925221759  |
| Ti | -0.033894014 | 13.177347469 | 7.433310035  |
| Ti | -0.033574359 | 13.178383319 | 10.391902340 |
| Ti | 3.211121530  | 12.992588933 | 8.877034284  |
| Ti | 3.210051383  | 12.993457618 | 0.005311254  |
| Ti | 6.461831493  | 13.018277304 | 7.423629163  |
| Ti | 6.459246462  | 13.087517821 | 10.385689316 |
| Ti | 9.711188933  | 12.995385728 | 8.883548727  |
| Ti | 9.709692493  | 12.995892580 | 0.010833311  |
| Ti | 9.690236180  | 16.318625853 | 1.494443660  |
| Ti | 9.683007004  | 16.320398943 | 4.451700995  |
| Ti | 6.426778619  | 16.314482452 | 2.964231357  |
| Ti | -0.065920108 | 16.636463643 | 5.939322643  |
| Ti | 3.162991272  | 16.310763750 | 1.496172201  |
| Ti | 3.172235790  | 16.318261877 | 4.453317628  |

|    |              |              |              |
|----|--------------|--------------|--------------|
| Ti | -0.066645663 | 16.636147173 | 2.984956698  |
| Ti | 6.437500224  | 16.269275090 | 5.932750235  |
| Ti | 3.173536619  | 16.318930893 | 7.408942360  |
| Ti | 3.162204670  | 16.311963908 | 10.364854314 |
| Ti | -0.067343161 | 16.635279202 | 8.891226374  |
| Ti | 6.432444593  | 16.413933363 | 0.019077359  |
| Ti | 9.680006981  | 16.320274284 | 7.409201073  |
| Ti | 9.690892504  | 16.317856110 | 10.366298590 |
| Ti | 6.425707562  | 16.312934035 | 8.904229233  |
| Ti | -0.066925441 | 16.635530306 | 0.023985697  |
| Ti | 6.417870640  | 19.560365281 | 7.581175658  |
| Ti | 6.406009398  | 19.941375648 | 10.488363383 |
| Ti | 3.186146925  | 19.570808795 | 8.892509057  |
| Ti | 3.171418925  | 19.561346124 | 0.024556120  |
| Ti | 6.406227220  | 19.940955593 | 1.396270637  |
| Ti | 6.411664072  | 19.561529720 | 4.299889845  |
| Ti | 3.180695785  | 19.568280963 | 2.982635612  |
| Ti | 3.191509481  | 19.568302037 | 5.938334871  |
| Ti | -0.080340924 | 20.001357450 | 1.498266158  |
| Ti | -0.075838746 | 20.004438212 | 4.458204199  |
| Ti | 9.668799205  | 19.570450176 | 2.984601692  |
| Ti | 9.637101727  | 19.577098549 | 5.939338021  |

|    |              |              |              |
|----|--------------|--------------|--------------|
| Ti | -0.075498309 | 20.005508352 | 7.411299763  |
| Ti | -0.075262303 | 19.999108226 | 10.370819627 |
| Ti | 9.672845736  | 19.570334447 | 8.896453519  |
| Ti | 9.645234924  | 19.576728500 | 0.025128673  |
| O  | 0.000000000  | 1.266694833  | 2.957400000  |
| O  | 0.000000000  | 1.266694833  | 0.000000000  |
| O  | 0.000000000  | 1.266694833  | 8.872200000  |
| O  | 0.000000000  | 1.266694833  | 5.914800000  |
| O  | 6.494400000  | 1.266694833  | 2.957400000  |
| O  | 6.494400000  | 1.266694833  | 0.000000000  |
| O  | 6.494400000  | 1.266694833  | 8.872200000  |
| O  | 6.494400000  | 1.266694833  | 5.914800000  |
| O  | 9.741600000  | 1.980495667  | 8.872200000  |
| O  | 9.741600000  | 1.980495667  | 5.914800000  |
| O  | 9.741600000  | 1.980495667  | 2.957400000  |
| O  | 9.741600000  | 1.980495667  | 0.000000000  |
| O  | 3.247200000  | 1.980495667  | 8.872200000  |
| O  | 3.247200000  | 1.980495667  | 5.914800000  |
| O  | 3.247200000  | 1.980495667  | 2.957400000  |
| O  | 3.247200000  | 1.980495667  | 0.000000000  |
| O  | 1.266698949  | 3.247194072  | 1.478700000  |
| O  | 1.266698949  | 3.247194072  | 4.436100000  |

|   |              |             |              |
|---|--------------|-------------|--------------|
| O | 5.227599738  | 3.247194072 | 1.478700000  |
| O | 5.227599738  | 3.247194072 | 4.436100000  |
| O | 1.266698949  | 3.247194072 | 7.393500000  |
| O | 1.266698949  | 3.247194072 | 10.350900000 |
| O | 5.227599738  | 3.247194072 | 7.393500000  |
| O | 5.227599738  | 3.247194072 | 10.350900000 |
| O | 7.761098949  | 3.247194072 | 1.478700000  |
| O | 7.761098949  | 3.247194072 | 4.436100000  |
| O | 11.721999738 | 3.247194072 | 1.478700000  |
| O | 11.721999738 | 3.247194072 | 4.436100000  |
| O | 7.761098949  | 3.247194072 | 7.393500000  |
| O | 7.761098949  | 3.247194072 | 10.350900000 |
| O | 11.721999738 | 3.247194072 | 7.393500000  |
| O | 11.721999738 | 3.247194072 | 10.350900000 |
| O | 9.741600000  | 4.513896049 | 8.872200000  |
| O | 9.741600000  | 4.513896049 | 5.914800000  |
| O | 9.741600000  | 4.513896049 | 2.957400000  |
| O | 9.741600000  | 4.513896049 | 0.000000000  |
| O | 3.247200000  | 4.513896049 | 8.872200000  |
| O | 3.247200000  | 4.513896049 | 5.914800000  |
| O | 3.247200000  | 4.513896049 | 2.957400000  |
| O | 3.247200000  | 4.513896049 | 0.000000000  |

|   |              |             |              |
|---|--------------|-------------|--------------|
| O | 0.000000000  | 5.227596870 | 2.957400000  |
| O | 0.000000000  | 5.227596870 | 0.000000000  |
| O | 0.000000000  | 5.227596870 | 8.872200000  |
| O | 0.000000000  | 5.227596870 | 5.914800000  |
| O | 6.494400000  | 5.227596870 | 0.000000000  |
| O | 6.494400000  | 5.227596870 | 2.957400000  |
| O | 6.494400000  | 5.227596870 | 8.872200000  |
| O | 6.494400000  | 5.227596870 | 5.914800000  |
| O | 8.474899752  | 6.494391717 | 7.393500000  |
| O | 11.008298949 | 6.494391717 | 7.393500000  |
| O | 8.474899752  | 6.494391717 | 10.350900000 |
| O | 11.008298949 | 6.494391717 | 10.350900000 |
| O | 8.474899752  | 6.494391717 | 1.478700000  |
| O | 11.008298949 | 6.494391717 | 1.478700000  |
| O | 8.474899752  | 6.494391717 | 4.436100000  |
| O | 11.008298949 | 6.494391717 | 4.436100000  |
| O | 1.980499752  | 6.494391717 | 1.478700000  |
| O | 4.513898949  | 6.494391717 | 1.478700000  |
| O | 1.980499752  | 6.494391717 | 4.436100000  |
| O | 4.513898949  | 6.494391717 | 4.436100000  |
| O | 1.980499752  | 6.494391717 | 7.393500000  |
| O | 4.513898949  | 6.494391717 | 7.393500000  |

|   |             |             |              |
|---|-------------|-------------|--------------|
| O | 1.980499752 | 6.494391717 | 10.350900000 |
| O | 4.513898949 | 6.494391717 | 10.350900000 |
| O | 0.000000000 | 7.761086550 | 8.872200000  |
| O | 0.000000000 | 7.761086550 | 5.914800000  |
| O | 6.494400000 | 7.761086550 | 2.957400000  |
| O | 6.494400000 | 7.761086550 | 0.000000000  |
| O | 0.000000000 | 7.761086550 | 2.957400000  |
| O | 0.000000000 | 7.761086550 | 0.000000000  |
| O | 6.494400000 | 7.761086550 | 8.872200000  |
| O | 6.494400000 | 7.761086550 | 5.914800000  |
| O | 3.247200000 | 8.474887384 | 2.957400000  |
| O | 3.247200000 | 8.474887384 | 0.000000000  |
| O | 3.247200000 | 8.474887384 | 8.872200000  |
| O | 3.247200000 | 8.474887384 | 5.914800000  |
| O | 9.741600000 | 8.474887384 | 2.957400000  |
| O | 9.741600000 | 8.474887384 | 0.000000000  |
| O | 9.741600000 | 8.474887384 | 8.872200000  |
| O | 9.741600000 | 8.474887384 | 5.914800000  |
| O | 1.268813396 | 9.789565658 | 1.483677777  |
| O | 1.268248513 | 9.789155961 | 4.440711060  |
| O | 5.210565447 | 9.771904411 | 1.485162274  |
| O | 5.210794569 | 9.773092424 | 4.443847442  |

|   |              |              |              |
|---|--------------|--------------|--------------|
| O | 1.269305671  | 9.788818060  | 7.397591267  |
| O | 1.269710143  | 9.789526367  | 10.356067169 |
| O | 5.211777821  | 9.773207439  | 7.401423821  |
| O | 5.211432709  | 9.772325181  | 10.358769996 |
| O | 7.758949173  | 9.781381012  | 1.486004305  |
| O | 7.758555872  | 9.782396860  | 4.443129503  |
| O | 11.700455216 | 9.779236445  | 1.483066542  |
| O | 11.699984631 | 9.778961052  | 4.440821667  |
| O | 7.759539384  | 9.782568311  | 7.400665544  |
| O | 7.759817344  | 9.781484954  | 10.359475987 |
| O | 11.700923462 | 9.778844251  | 7.398919613  |
| O | 11.701514842 | 9.779131074  | 10.355546194 |
| O | 9.725483237  | 11.073832440 | 2.961942685  |
| O | 9.723883017  | 11.073837084 | 0.004503647  |
| O | 3.244355713  | 11.071610006 | 2.960961774  |
| O | 3.244059828  | 11.072054707 | 0.003573840  |
| O | 3.244151139  | 11.071604648 | 8.876216504  |
| O | 3.243486502  | 11.072188296 | 5.918691584  |
| O | 9.725701319  | 11.073358807 | 8.877229828  |
| O | 9.725070583  | 11.073779576 | 5.919533733  |
| O | 6.460979168  | 11.791864544 | 8.892967691  |
| O | -0.032882576 | 11.798979049 | 2.961969656  |

|   |              |              |              |
|---|--------------|--------------|--------------|
| O | 6.463207527  | 11.799697715 | 0.011632519  |
| O | 6.462292985  | 11.789364573 | 5.925885636  |
| O | -0.032350425 | 11.799235869 | 0.004298167  |
| O | -0.032600849 | 11.799060846 | 5.919355934  |
| O | 6.459882784  | 11.791629870 | 2.959252515  |
| O | -0.032545517 | 11.799148357 | 8.876496038  |
| O | 8.431016052  | 13.096451851 | 1.492013860  |
| O | 8.429082280  | 13.089891347 | 4.446554291  |
| O | 10.965691659 | 13.117557121 | 1.488045266  |
| O | 10.965443702 | 13.119752409 | 4.448238826  |
| O | 1.955123663  | 13.094525169 | 1.488358395  |
| O | 1.956097304  | 13.096359696 | 4.445194360  |
| O | 4.489806803  | 13.117177428 | 1.488000077  |
| O | 4.492492108  | 13.109168877 | 4.446038875  |
| O | 1.955757906  | 13.096170028 | 7.401842471  |
| O | 1.954823752  | 13.094543386 | 10.357887626 |
| O | 4.492566664  | 13.108722390 | 7.402275670  |
| O | 4.489654445  | 13.117296373 | 10.359727129 |
| O | 8.428829518  | 13.090005290 | 7.405400223  |
| O | 8.430447013  | 13.097260171 | 10.360203507 |
| O | 10.964944413 | 13.119910287 | 7.403034303  |
| O | 10.965346027 | 13.117850017 | 10.361789265 |



|   |              |              |              |
|---|--------------|--------------|--------------|
| O | -0.035171073 | 14.410732930 | 2.973844800  |
| O | -0.033327442 | 14.410517902 | 5.931561952  |
| O | -0.035201077 | 14.411456239 | 8.889185649  |
| O | -0.033323156 | 14.411997382 | 0.016716526  |
| O | 6.454280844  | 14.408406553 | 2.981189917  |
| O | 6.460385190  | 14.403089070 | 5.928819141  |
| O | 6.453792725  | 14.408083654 | 8.876000259  |
| O | 6.460982545  | 14.431492441 | 0.013832706  |
| O | 9.672226559  | 15.115867627 | 8.886084756  |
| O | 3.193353241  | 15.112461108 | 8.885144067  |
| O | 9.666370819  | 15.116440916 | 5.931405446  |
| O | 9.672487764  | 15.115647955 | 2.975909893  |
| O | 3.193545086  | 15.111834597 | 2.977980428  |
| O | 9.677949035  | 15.115651170 | 0.016969561  |
| O | 3.178760584  | 15.110819821 | 0.016425754  |
| O | 3.195317407  | 15.112546476 | 5.931867983  |
| O | 1.223183612  | 16.478232517 | 10.368381191 |
| O | 5.157599328  | 16.469361353 | 4.463075273  |
| O | 5.157813384  | 16.469633531 | 7.404053186  |
| O | 7.711844510  | 16.452854543 | 1.495799214  |
| O | 7.706662239  | 16.476070090 | 4.453250317  |
| O | 5.148375202  | 16.438293703 | 10.377570070 |

|   |              |              |              |
|---|--------------|--------------|--------------|
| O | 11.637102474 | 16.466811375 | 1.499650340  |
| O | 11.637039088 | 16.462378651 | 4.459179195  |
| O | 1.224707847  | 16.472491406 | 4.455947821  |
| O | 1.223099314  | 16.477501350 | 1.500632906  |
| O | 5.148279734  | 16.438536593 | 1.490102788  |
| O | 7.706417530  | 16.476949849 | 7.412883154  |
| O | 7.712188584  | 16.451306840 | 10.371276604 |
| O | 1.224941646  | 16.472702148 | 7.413534492  |
| O | 11.636477323 | 16.462931223 | 7.410821019  |
| O | 11.637356015 | 16.466124499 | 10.371029484 |
| O | 3.202026902  | 17.745245607 | 8.889872239  |
| O | 3.205229161  | 17.740796094 | 0.019586860  |
| O | 9.656723258  | 17.747205507 | 2.980174109  |
| O | 9.654269673  | 17.753493475 | 5.934417381  |
| O | 3.199887647  | 17.743458229 | 2.978679439  |
| O | 3.192027474  | 17.745424201 | 5.934152161  |
| O | 9.657184880  | 17.747069060 | 8.890434382  |
| O | 9.644628737  | 17.752236167 | 0.019882600  |
| O | 6.434694123  | 18.571101505 | 0.025740500  |
| O | 6.468042737  | 18.628224717 | 5.938974616  |
| O | -0.072291115 | 18.508280045 | 0.024261918  |
| O | 6.418493972  | 18.459646876 | 2.891654277  |

|   |              |              |              |
|---|--------------|--------------|--------------|
| O | -0.068089757 | 18.515030932 | 5.938561289  |
| O | 6.421057572  | 18.457955940 | 8.987518135  |
| O | -0.076917595 | 18.511348662 | 8.886314724  |
| O | -0.076956172 | 18.511692636 | 2.990400680  |
| O | 1.981997101  | 19.964933383 | 4.465420847  |
| O | 4.435196822  | 19.973111957 | 1.520873470  |
| O | 4.492319097  | 19.945714075 | 4.475707039  |
| O | 1.983457821  | 19.965997094 | 7.412545893  |
| O | 1.961739898  | 19.927587410 | 10.370334613 |
| O | 4.495473427  | 19.945210438 | 7.401375556  |
| O | 4.436923554  | 19.974977559 | 10.359236792 |
| O | 8.408209538  | 20.015015671 | 1.533252674  |
| O | 8.357988732  | 20.007836515 | 4.467801790  |
| O | 10.877204030 | 19.938220949 | 1.500371709  |
| O | 10.861991287 | 19.967958423 | 4.470702526  |
| O | 8.360105127  | 20.007985463 | 7.412629528  |
| O | 8.409341252  | 20.016816265 | 10.348031204 |
| O | 10.862906738 | 19.967302266 | 7.407360151  |
| O | 10.879327569 | 19.935714191 | 10.378565767 |
| O | 1.959298394  | 19.926897677 | 1.504990458  |
| O | -0.071300069 | 21.111767127 | 0.021326876  |
| O | 6.413128169  | 21.168759250 | 3.079392159  |

|   |              |              |              |
|---|--------------|--------------|--------------|
| O | -0.074395560 | 21.113203744 | 2.980584596  |
| O | -0.071311889 | 21.118145821 | 5.936628333  |
| O | -0.074446606 | 21.112878344 | 8.894017095  |
| O | 6.416881153  | 21.167028666 | 8.802751612  |
| O | 6.417204185  | 21.177035337 | 0.027282488  |
| H | 0.000000000  | 0.932897449  | 9.814799089  |
| H | 0.816399334  | 0.932897449  | 8.400899272  |
| H | 6.457698847  | 0.932897449  | 6.856699960  |
| H | 0.834099172  | 0.932897449  | -0.439201108 |
| H | 0.000000000  | 0.932897449  | 3.899999089  |
| H | 0.816399334  | 0.932897449  | 2.486099272  |
| H | 6.457698847  | 0.932897449  | 0.941899960  |
| H | 0.834099172  | 0.932897449  | 5.475598892  |
| H | 6.494400000  | 0.932897449  | 9.814799089  |
| H | 7.310799334  | 0.932897449  | 8.400899272  |
| H | -0.036701153 | 0.932897449  | 6.856699960  |
| H | 7.328499172  | 0.932897449  | -0.439201108 |
| H | 6.494400000  | 0.932897449  | 3.899999089  |
| H | 7.310799334  | 0.932897449  | 2.486099272  |
| H | -0.036701153 | 0.932897449  | 0.941899960  |
| H | 7.328499172  | 0.932897449  | 5.475598892  |
| H | 7.244288755  | 21.679429494 | 3.115188410  |

|   |             |              |             |
|---|-------------|--------------|-------------|
| H | 7.251164636 | 21.669843592 | 8.770695171 |
|---|-------------|--------------|-------------|

TS7-B1:

|    |             |             |              |
|----|-------------|-------------|--------------|
| Ti | 3.247200000 | 3.247194072 | 1.478700000  |
| Ti | 3.247200000 | 3.247194072 | 4.436100000  |
| Ti | 0.000000000 | 3.247194072 | 2.957400000  |
| Ti | 0.000000000 | 3.247194072 | 0.000000000  |
| Ti | 3.247200000 | 3.247194072 | 7.393500000  |
| Ti | 3.247200000 | 3.247194072 | 10.350900000 |
| Ti | 0.000000000 | 3.247194072 | 8.872200000  |
| Ti | 0.000000000 | 3.247194072 | 5.914800000  |
| Ti | 9.741600000 | 3.247194072 | 1.478700000  |
| Ti | 9.741600000 | 3.247194072 | 4.436100000  |
| Ti | 6.494400000 | 3.247194072 | 2.957400000  |
| Ti | 6.494400000 | 3.247194072 | 0.000000000  |
| Ti | 9.741600000 | 3.247194072 | 7.393500000  |
| Ti | 9.741600000 | 3.247194072 | 10.350900000 |
| Ti | 6.494400000 | 3.247194072 | 8.872200000  |
| Ti | 6.494400000 | 3.247194072 | 5.914800000  |
| Ti | 0.000000000 | 6.494391717 | 4.436100000  |
| Ti | 0.000000000 | 6.494391717 | 1.478700000  |
| Ti | 3.247200000 | 6.494391717 | 2.957400000  |
| Ti | 3.247200000 | 6.494391717 | 0.000000000  |

|    |              |             |              |
|----|--------------|-------------|--------------|
| Ti | 0.000000000  | 6.494391717 | 10.350900000 |
| Ti | 0.000000000  | 6.494391717 | 7.393500000  |
| Ti | 3.247200000  | 6.494391717 | 8.872200000  |
| Ti | 3.247200000  | 6.494391717 | 5.914800000  |
| Ti | 6.494400000  | 6.494391717 | 4.436100000  |
| Ti | 6.494400000  | 6.494391717 | 1.478700000  |
| Ti | 9.741600000  | 6.494391717 | 2.957400000  |
| Ti | 9.741600000  | 6.494391717 | 0.000000000  |
| Ti | 6.494400000  | 6.494391717 | 10.350900000 |
| Ti | 6.494400000  | 6.494391717 | 7.393500000  |
| Ti | 9.741600000  | 6.494391717 | 8.872200000  |
| Ti | 9.741600000  | 6.494391717 | 5.914800000  |
| Ti | 3.219839742  | 9.736245802 | 1.480367974  |
| Ti | 3.224882774  | 9.738206774 | 4.437306619  |
| Ti | -0.020356567 | 9.834040781 | 2.965290343  |
| Ti | -0.019018591 | 9.836169632 | 0.006056755  |
| Ti | 3.225257111  | 9.735595717 | 7.393925866  |
| Ti | 3.223442056  | 9.736970897 | 10.352485166 |
| Ti | -0.015996487 | 9.836980453 | 8.877345876  |
| Ti | -0.017490069 | 9.835798155 | 5.920667482  |
| Ti | 9.732364184  | 9.737331659 | 1.479800153  |
| Ti | 9.729126206  | 9.738942585 | 4.436395740  |

|    |              |              |              |
|----|--------------|--------------|--------------|
| Ti | 6.475495191  | 9.753155165  | 2.963977258  |
| Ti | 6.476671717  | 9.752412210  | 0.011498371  |
| Ti | 9.733656829  | 9.738528245  | 7.392470825  |
| Ti | 9.733937907  | 9.736967325  | 10.349444959 |
| Ti | 6.480061794  | 9.753748099  | 8.887211762  |
| Ti | 6.478095159  | 9.728080445  | 5.927848049  |
| Ti | -0.041376991 | 13.173336228 | 1.524788122  |
| Ti | -0.041185407 | 13.175400785 | 4.481016991  |
| Ti | 3.211272330  | 12.991040872 | 2.973440938  |
| Ti | 3.201595934  | 12.992480347 | 5.930545198  |
| Ti | 6.455567125  | 13.116703795 | 1.464977664  |
| Ti | 6.454893785  | 12.995862934 | 4.440559759  |
| Ti | 9.702503842  | 12.995795068 | 2.974008758  |
| Ti | 9.701974029  | 12.997863196 | 5.931527054  |
| Ti | -0.043914353 | 13.176908126 | 7.437092076  |
| Ti | -0.042278934 | 13.177383188 | 10.394551224 |
| Ti | 3.207053568  | 12.989612113 | 8.887980686  |
| Ti | 3.196187397  | 12.992083866 | 0.016289359  |
| Ti | 6.449420305  | 13.002874568 | 7.449607793  |
| Ti | 6.450315753  | 13.118253998 | 10.428336562 |
| Ti | 9.697160769  | 12.994887806 | 8.886963341  |
| Ti | 9.706737022  | 12.991480216 | 0.013745995  |

|    |              |              |              |
|----|--------------|--------------|--------------|
| Ti | 9.691573637  | 16.306740365 | 1.505647829  |
| Ti | 9.681040759  | 16.328778972 | 4.466064377  |
| Ti | 6.422798591  | 16.298189242 | 2.971418076  |
| Ti | -0.061169455 | 16.634540534 | 5.945261220  |
| Ti | 3.162826574  | 16.304422203 | 1.504843416  |
| Ti | 3.176607950  | 16.311883897 | 4.463958708  |
| Ti | -0.067527602 | 16.627339588 | 2.991753158  |
| Ti | 6.446520166  | 16.250629428 | 5.951755670  |
| Ti | 3.177438064  | 16.310548007 | 7.421808233  |
| Ti | 3.167544755  | 16.309851487 | 10.377197201 |
| Ti | -0.065875946 | 16.632911748 | 8.899195147  |
| Ti | 6.434904152  | 16.577793799 | 0.038529007  |
| Ti | 9.683456026  | 16.328182465 | 7.419678905  |
| Ti | 9.689417756  | 16.313137633 | 10.376392788 |
| Ti | 6.425601184  | 16.305718802 | 8.922795199  |
| Ti | -0.064843467 | 16.629154112 | 0.028698610  |
| Ti | 6.284069894  | 19.458496910 | 4.315757479  |
| Ti | 6.430709419  | 19.960359212 | 10.551825756 |
| Ti | 3.162589788  | 19.558920806 | 2.972033215  |
| Ti | 3.150518776  | 19.555634660 | 5.962686221  |
| Ti | 3.202459039  | 19.562846321 | 8.913343349  |
| Ti | 6.414780474  | 19.562367687 | 7.614252166  |



|    |              |              |              |
|----|--------------|--------------|--------------|
| Ti | 3.224449208  | 19.563542841 | 0.030520368  |
| Ti | 6.455794559  | 20.058507809 | 1.532016007  |
| Ti | -0.035727383 | 19.995846012 | 1.486341922  |
| Ti | -0.074975250 | 20.001478895 | 4.455275782  |
| Ti | 9.760810305  | 19.565214489 | 2.938827528  |
| Ti | 9.638665059  | 19.604269615 | 5.967642823  |
| Ti | -0.070272655 | 20.004114955 | 7.411232570  |
| Ti | -0.053669072 | 19.993009926 | 10.367201189 |
| Ti | 9.668983906  | 19.574240674 | 8.900035049  |
| Ti | 9.662244667  | 19.567725533 | 0.004140360  |
| O  | 0.000000000  | 1.266694833  | 2.957400000  |
| O  | 0.000000000  | 1.266694833  | 0.000000000  |
| O  | 0.000000000  | 1.266694833  | 8.872200000  |
| O  | 0.000000000  | 1.266694833  | 5.914800000  |
| O  | 6.494400000  | 1.266694833  | 2.957400000  |
| O  | 6.494400000  | 1.266694833  | 0.000000000  |
| O  | 6.494400000  | 1.266694833  | 8.872200000  |
| O  | 6.494400000  | 1.266694833  | 5.914800000  |
| O  | 9.741600000  | 1.980495667  | 8.872200000  |
| O  | 9.741600000  | 1.980495667  | 5.914800000  |
| O  | 9.741600000  | 1.980495667  | 2.957400000  |
| O  | 9.741600000  | 1.980495667  | 0.000000000  |

|   |              |             |              |
|---|--------------|-------------|--------------|
| O | 3.247200000  | 1.980495667 | 8.872200000  |
| O | 3.247200000  | 1.980495667 | 5.914800000  |
| O | 3.247200000  | 1.980495667 | 2.957400000  |
| O | 3.247200000  | 1.980495667 | 0.000000000  |
| O | 1.266698949  | 3.247194072 | 1.478700000  |
| O | 1.266698949  | 3.247194072 | 4.436100000  |
| O | 5.227599738  | 3.247194072 | 1.478700000  |
| O | 5.227599738  | 3.247194072 | 4.436100000  |
| O | 1.266698949  | 3.247194072 | 7.393500000  |
| O | 1.266698949  | 3.247194072 | 10.350900000 |
| O | 5.227599738  | 3.247194072 | 7.393500000  |
| O | 5.227599738  | 3.247194072 | 10.350900000 |
| O | 7.761098949  | 3.247194072 | 1.478700000  |
| O | 7.761098949  | 3.247194072 | 4.436100000  |
| O | 11.721999738 | 3.247194072 | 1.478700000  |
| O | 11.721999738 | 3.247194072 | 4.436100000  |
| O | 7.761098949  | 3.247194072 | 7.393500000  |
| O | 7.761098949  | 3.247194072 | 10.350900000 |
| O | 11.721999738 | 3.247194072 | 7.393500000  |
| O | 11.721999738 | 3.247194072 | 10.350900000 |
| O | 9.741600000  | 4.513896049 | 8.872200000  |
| O | 9.741600000  | 4.513896049 | 5.914800000  |

|   |              |             |              |
|---|--------------|-------------|--------------|
| O | 9.741600000  | 4.513896049 | 2.957400000  |
| O | 9.741600000  | 4.513896049 | 0.000000000  |
| O | 3.247200000  | 4.513896049 | 8.872200000  |
| O | 3.247200000  | 4.513896049 | 5.914800000  |
| O | 3.247200000  | 4.513896049 | 2.957400000  |
| O | 3.247200000  | 4.513896049 | 0.000000000  |
| O | 0.000000000  | 5.227596870 | 2.957400000  |
| O | 0.000000000  | 5.227596870 | 0.000000000  |
| O | 0.000000000  | 5.227596870 | 8.872200000  |
| O | 0.000000000  | 5.227596870 | 5.914800000  |
| O | 6.494400000  | 5.227596870 | 0.000000000  |
| O | 6.494400000  | 5.227596870 | 2.957400000  |
| O | 6.494400000  | 5.227596870 | 8.872200000  |
| O | 6.494400000  | 5.227596870 | 5.914800000  |
| O | 8.474899752  | 6.494391717 | 7.393500000  |
| O | 11.008298949 | 6.494391717 | 7.393500000  |
| O | 8.474899752  | 6.494391717 | 10.350900000 |
| O | 11.008298949 | 6.494391717 | 10.350900000 |
| O | 8.474899752  | 6.494391717 | 1.478700000  |
| O | 11.008298949 | 6.494391717 | 1.478700000  |
| O | 8.474899752  | 6.494391717 | 4.436100000  |
| O | 11.008298949 | 6.494391717 | 4.436100000  |

|   |             |             |              |
|---|-------------|-------------|--------------|
| O | 1.980499752 | 6.494391717 | 1.478700000  |
| O | 4.513898949 | 6.494391717 | 1.478700000  |
| O | 1.980499752 | 6.494391717 | 4.436100000  |
| O | 4.513898949 | 6.494391717 | 4.436100000  |
| O | 1.980499752 | 6.494391717 | 7.393500000  |
| O | 4.513898949 | 6.494391717 | 7.393500000  |
| O | 1.980499752 | 6.494391717 | 10.350900000 |
| O | 4.513898949 | 6.494391717 | 10.350900000 |
| O | 0.000000000 | 7.761086550 | 8.872200000  |
| O | 0.000000000 | 7.761086550 | 5.914800000  |
| O | 6.494400000 | 7.761086550 | 2.957400000  |
| O | 6.494400000 | 7.761086550 | 0.000000000  |
| O | 0.000000000 | 7.761086550 | 2.957400000  |
| O | 0.000000000 | 7.761086550 | 0.000000000  |
| O | 6.494400000 | 7.761086550 | 8.872200000  |
| O | 6.494400000 | 7.761086550 | 5.914800000  |
| O | 3.247200000 | 8.474887384 | 2.957400000  |
| O | 3.247200000 | 8.474887384 | 0.000000000  |
| O | 3.247200000 | 8.474887384 | 8.872200000  |
| O | 3.247200000 | 8.474887384 | 5.914800000  |
| O | 9.741600000 | 8.474887384 | 2.957400000  |
| O | 9.741600000 | 8.474887384 | 0.000000000  |

|   |              |              |              |
|---|--------------|--------------|--------------|
| O | 9.741600000  | 8.474887384  | 8.872200000  |
| O | 9.741600000  | 8.474887384  | 5.914800000  |
| O | 1.263779586  | 9.787152484  | 1.484094298  |
| O | 1.264573462  | 9.787727560  | 4.440299508  |
| O | 5.206691927  | 9.772597002  | 1.485632146  |
| O | 5.207460864  | 9.772739878  | 4.445386236  |
| O | 1.265003781  | 9.786609556  | 7.398527580  |
| O | 1.264869477  | 9.788059746  | 10.356128683 |
| O | 5.207818186  | 9.770703896  | 7.401863527  |
| O | 5.207348640  | 9.772507705  | 10.360588442 |
| O | 7.754975769  | 9.779483620  | 1.486081670  |
| O | 7.754892771  | 9.779912248  | 4.444711949  |
| O | 11.695179295 | 9.780673062  | 1.483621114  |
| O | 11.695572466 | 9.780201572  | 4.441849186  |
| O | 7.755911222  | 9.778394192  | 7.401733402  |
| O | 7.755667682  | 9.780165853  | 10.361037967 |
| O | 11.696451288 | 9.779433614  | 7.398267329  |
| O | 11.695733787 | 9.780362307  | 10.355631840 |
| O | 9.717694503  | 11.073949956 | 2.964533249  |
| O | 9.715836455  | 11.073549903 | 0.007085930  |
| O | 3.236752329  | 11.068924296 | 2.964225679  |
| O | 3.235443447  | 11.070167317 | 0.007369841  |

|   |              |              |              |
|---|--------------|--------------|--------------|
| O | 3.237112378  | 11.068520672 | 8.878256755  |
| O | 3.235846880  | 11.069085032 | 5.922465581  |
| O | 9.717125464  | 11.073592766 | 8.878008334  |
| O | 9.716043627  | 11.074871505 | 5.921803123  |
| O | 6.457660790  | 11.789583173 | 8.902661220  |
| O | -0.039121097 | 11.798830815 | 2.969690954  |
| O | 6.460723159  | 11.803320691 | 0.024014088  |
| O | 6.459826932  | 11.784439641 | 5.940340106  |
| O | -0.038944709 | 11.798730802 | 0.012172658  |
| O | -0.037999514 | 11.798716515 | 5.926795214  |
| O | 6.458490254  | 11.789601033 | 2.968756416  |
| O | -0.039310214 | 11.798827244 | 8.883012254  |
| O | 8.427283591  | 13.102098306 | 1.502595792  |
| O | 8.421712824  | 13.094540171 | 4.455571522  |
| O | 10.959047238 | 13.116210873 | 1.496811118  |
| O | 10.957622756 | 13.119018384 | 4.456979244  |
| O | 1.947684068  | 13.094818779 | 1.500643908  |
| O | 1.949530816  | 13.097490559 | 4.454424050  |
| O | 4.481384346  | 13.109960053 | 1.498100544  |
| O | 4.486456083  | 13.097390546 | 4.457771827  |
| O | 1.948727459  | 13.097797742 | 7.411682095  |
| O | 1.946794076  | 13.092086278 | 10.366349458 |

|   |              |              |              |
|---|--------------|--------------|--------------|
| O | 4.485418407  | 13.101583953 | 7.411362696  |
| O | 4.480765949  | 13.107323992 | 10.369129414 |
| O | 8.420613452  | 13.096640447 | 7.412202598  |
| O | 8.426138628  | 13.098765726 | 10.366101036 |
| O | 10.956659247 | 13.118696914 | 7.408807502  |
| O | 10.958331555 | 13.115246461 | 10.367260337 |
| O | -0.044228812 | 14.410102133 | 2.981603362  |
| O | -0.041321140 | 14.409473479 | 5.938719451  |
| O | -0.044579900 | 14.410562908 | 8.896249577  |
| O | -0.040004335 | 14.410012836 | 0.023789326  |
| O | 6.441464405  | 14.398404169 | 2.998590667  |
| O | 6.450272890  | 14.395118024 | 5.937713935  |
| O | 6.442783678  | 14.404247793 | 8.888867906  |
| O | 6.457883807  | 14.417013755 | 0.025516447  |
| O | 9.677393504  | 15.119563112 | 8.892097387  |
| O | 3.199826859  | 15.108100893 | 8.900957758  |
| O | 9.666297822  | 15.126171122 | 5.941156349  |
| O | 9.675158132  | 15.118827301 | 2.991670351  |
| O | 3.201581906  | 15.107318647 | 2.990369095  |
| O | 9.681132330  | 15.113473027 | 0.023966770  |
| O | 3.175897073  | 15.106332804 | 0.022913935  |
| O | 3.204588943  | 15.107457951 | 5.941523066  |

|   |              |              |              |
|---|--------------|--------------|--------------|
| O | 1.227113113  | 16.476269760 | 10.376428277 |
| O | 5.161035515  | 16.493011243 | 4.481655790  |
| O | 5.161548053  | 16.470554724 | 7.416875290  |
| O | 7.715017284  | 16.442761790 | 1.507031892  |
| O | 7.705978379  | 16.470994067 | 4.457286814  |
| O | 5.153990650  | 16.445087095 | 10.398762562 |
| O | 11.638536567 | 16.466025558 | 1.506002717  |
| O | 11.637526038 | 16.466993542 | 4.471293060  |
| O | 1.227527846  | 16.464861119 | 4.462125120  |
| O | 1.224993861  | 16.469876063 | 1.509220368  |
| O | 5.150365476  | 16.416626217 | 1.490032757  |
| O | 7.708619651  | 16.458913910 | 7.432596828  |
| O | 7.713371214  | 16.446519426 | 10.389026801 |
| O | 1.227478099  | 16.460771297 | 7.424540870  |
| O | 11.636684104 | 16.472387107 | 7.415739648  |
| O | 11.639828823 | 16.465246884 | 10.377682214 |
| O | 3.207797046  | 17.737381717 | 8.900827632  |
| O | 3.223642733  | 17.740607141 | 0.036163087  |
| O | 9.667938827  | 17.750565591 | 2.985885677  |
| O | 9.634119109  | 17.780119470 | 5.937915038  |
| O | 3.200997280  | 17.735502899 | 2.982112034  |
| O | 3.178361698  | 17.737203122 | 5.949555365  |



|   |              |              |              |
|---|--------------|--------------|--------------|
| O | 9.652849478  | 17.750754901 | 8.895835541  |
| O | 9.653122632  | 17.744446930 | 0.022452581  |
| O | 6.451060791  | 18.582810542 | 0.060756826  |
| O | 6.528410653  | 18.613968203 | 5.976550512  |
| O | -0.062872936 | 18.504400250 | 0.027882367  |
| O | 6.386099256  | 18.422557365 | 2.859096024  |
| O | -0.056694164 | 18.512979948 | 5.945273050  |
| O | 6.434404863  | 18.458533516 | 9.013540061  |
| O | -0.070623742 | 18.509104439 | 8.889459386  |
| O | -0.077754983 | 18.506321931 | 2.994485796  |
| O | 1.974765976  | 19.959576966 | 4.467247337  |
| O | 4.450642194  | 20.002332578 | 1.550127125  |
| O | 4.452895881  | 19.924086593 | 4.490125783  |
| O | 1.981324801  | 19.963856099 | 7.438487969  |
| O | 1.981245309  | 19.918210822 | 10.384649849 |
| O | 4.497370571  | 19.921861301 | 7.396481059  |
| O | 4.463353813  | 19.981894181 | 10.366763494 |
| O | 8.448822138  | 19.973800262 | 1.529448984  |
| O | 8.368423934  | 20.142740293 | 4.415895043  |
| O | 10.915646332 | 19.936491793 | 1.473175577  |
| O | 10.860049462 | 19.965924228 | 4.481951530  |
| O | 8.360275540  | 20.040287560 | 7.421654448  |

|   |              |              |              |
|---|--------------|--------------|--------------|
| O | 8.416772014  | 20.030772025 | 10.357796657 |
| O | 10.866694792 | 19.968553144 | 7.395700306  |
| O | 10.896951942 | 19.934305792 | 10.365580534 |
| O | 1.971303682  | 19.926244019 | 1.494989359  |
| O | -0.050238600 | 21.110260144 | 0.016644247  |
| O | 6.583112335  | 21.029645991 | 3.195068494  |
| O | -0.067910772 | 21.105134471 | 2.976623100  |
| O | -0.063509517 | 21.115225081 | 5.936566464  |
| O | -0.064393535 | 21.110874510 | 8.893327666  |
| O | 6.414541870  | 21.161588309 | 8.834037710  |
| O | 6.440331652  | 21.200907756 | 0.075035153  |
| H | 0.000000000  | 0.932897449  | 9.814799089  |
| H | 0.816399334  | 0.932897449  | 8.400899272  |
| H | 6.457698847  | 0.932897449  | 6.856699960  |
| H | 0.834099172  | 0.932897449  | -0.439201108 |
| H | 0.000000000  | 0.932897449  | 3.899999089  |
| H | 0.816399334  | 0.932897449  | 2.486099272  |
| H | 6.457698847  | 0.932897449  | 0.941899960  |
| H | 0.834099172  | 0.932897449  | 5.475598892  |
| H | 6.494400000  | 0.932897449  | 9.814799089  |
| H | 7.310799334  | 0.932897449  | 8.400899272  |
| H | -0.036701153 | 0.932897449  | 6.856699960  |

|   |              |              |              |
|---|--------------|--------------|--------------|
| H | 7.328499172  | 0.932897449  | -0.439201108 |
| H | 6.494400000  | 0.932897449  | 3.899999089  |
| H | 7.310799334  | 0.932897449  | 2.486099272  |
| H | -0.036701153 | 0.932897449  | 0.941899960  |
| H | 7.328499172  | 0.932897449  | 5.475598892  |
| H | 7.721157999  | 20.873914836 | 3.801300005  |
| H | 7.245719861  | 21.667797610 | 8.775871567  |

7-Bb:

|    |             |             |              |
|----|-------------|-------------|--------------|
| Ti | 3.247200000 | 3.247194072 | 1.478700000  |
| Ti | 3.247200000 | 3.247194072 | 4.436100000  |
| Ti | 0.000000000 | 3.247194072 | 2.957400000  |
| Ti | 0.000000000 | 3.247194072 | 0.000000000  |
| Ti | 3.247200000 | 3.247194072 | 7.393500000  |
| Ti | 3.247200000 | 3.247194072 | 10.350900000 |
| Ti | 0.000000000 | 3.247194072 | 8.872200000  |
| Ti | 0.000000000 | 3.247194072 | 5.914800000  |
| Ti | 9.741600000 | 3.247194072 | 1.478700000  |
| Ti | 9.741600000 | 3.247194072 | 4.436100000  |
| Ti | 6.494400000 | 3.247194072 | 2.957400000  |
| Ti | 6.494400000 | 3.247194072 | 0.000000000  |
| Ti | 9.741600000 | 3.247194072 | 7.393500000  |
| Ti | 9.741600000 | 3.247194072 | 10.350900000 |

|    |              |             |              |
|----|--------------|-------------|--------------|
| Ti | 6.494400000  | 3.247194072 | 8.872200000  |
| Ti | 6.494400000  | 3.247194072 | 5.914800000  |
| Ti | 0.000000000  | 6.494391717 | 4.436100000  |
| Ti | 0.000000000  | 6.494391717 | 1.478700000  |
| Ti | 3.247200000  | 6.494391717 | 2.957400000  |
| Ti | 3.247200000  | 6.494391717 | 0.000000000  |
| Ti | 0.000000000  | 6.494391717 | 10.350900000 |
| Ti | 0.000000000  | 6.494391717 | 7.393500000  |
| Ti | 3.247200000  | 6.494391717 | 8.872200000  |
| Ti | 3.247200000  | 6.494391717 | 5.914800000  |
| Ti | 6.494400000  | 6.494391717 | 4.436100000  |
| Ti | 6.494400000  | 6.494391717 | 1.478700000  |
| Ti | 9.741600000  | 6.494391717 | 2.957400000  |
| Ti | 9.741600000  | 6.494391717 | 0.000000000  |
| Ti | 6.494400000  | 6.494391717 | 10.350900000 |
| Ti | 6.494400000  | 6.494391717 | 7.393500000  |
| Ti | 9.741600000  | 6.494391717 | 8.872200000  |
| Ti | 9.741600000  | 6.494391717 | 5.914800000  |
| Ti | 3.225680416  | 9.737045193 | 1.479149880  |
| Ti | 3.226886686  | 9.737358805 | 4.437021644  |
| Ti | -0.015207287 | 9.837397293 | 2.966388367  |
| Ti | -0.012474573 | 9.838083098 | 0.007040741  |

|    |              |              |              |
|----|--------------|--------------|--------------|
| Ti | 3.230013739  | 9.737540615  | 7.393601261  |
| Ti | 3.226778359  | 9.737031977  | 10.351584579 |
| Ti | -0.009662368 | 9.837893430  | 8.876140676  |
| Ti | -0.016103514 | 9.836759710  | 5.921063537  |
| Ti | 9.739727664  | 9.736285093  | 1.484273871  |
| Ti | 9.731859439  | 9.739801626  | 4.439205388  |
| Ti | 6.478870850  | 9.753741313  | 2.964199417  |
| Ti | 6.483118967  | 9.755414032  | 0.011472109  |
| Ti | 9.736598403  | 9.737245933  | 7.394729687  |
| Ti | 9.743213469  | 9.733855846  | 10.354295568 |
| Ti | 6.484567478  | 9.756620977  | 8.890274328  |
| Ti | 6.480271303  | 9.731030118  | 5.928502699  |
| Ti | -0.034985722 | 13.175871204 | 1.514880004  |
| Ti | -0.033924148 | 13.176863120 | 4.473579485  |
| Ti | 3.212093352  | 12.989736772 | 2.959843995  |
| Ti | 3.211073731  | 12.993683005 | 5.916508431  |
| Ti | 6.460217505  | 13.117977533 | 1.441085184  |
| Ti | 6.459795888  | 13.002976725 | 4.417421180  |
| Ti | 9.707927185  | 12.993868743 | 2.963133571  |
| Ti | 9.708897449  | 12.995462167 | 5.919536808  |
| Ti | -0.034232502 | 13.176907411 | 7.430185482  |
| Ti | -0.034342517 | 13.177812173 | 10.386471725 |

|    |              |              |              |
|----|--------------|--------------|--------------|
| Ti | 3.212243762  | 12.989789637 | 8.874035244  |
| Ti | 3.208046821  | 12.993167223 | 0.002087924  |
| Ti | 6.460330118  | 13.005578495 | 7.428553471  |
| Ti | 6.459191000  | 13.127009433 | 10.402745470 |
| Ti | 9.708179298  | 12.988304084 | 8.876767054  |
| Ti | 9.710175547  | 12.987801161 | 0.004873795  |
| Ti | 9.690792750  | 16.300264515 | 1.488910483  |
| Ti | 9.681431332  | 16.322513149 | 4.449790041  |
| Ti | 6.426714714  | 16.308465591 | 2.951109019  |
| Ti | -0.069248229 | 16.635792841 | 5.935244979  |
| Ti | 3.164650201  | 16.308056609 | 1.489576726  |
| Ti | 3.168974952  | 16.310615874 | 4.446502004  |
| Ti | -0.070651279 | 16.630278903 | 2.978307635  |
| Ti | 6.438763125  | 16.257488543 | 5.922162506  |
| Ti | 3.175056178  | 16.311624577 | 7.405301209  |
| Ti | 3.164501739  | 16.310980921 | 10.361132722 |
| Ti | -0.068759330 | 16.640425949 | 8.883691628  |
| Ti | 6.435567880  | 16.593181176 | 0.016784783  |
| Ti | 9.670716871  | 16.309177828 | 7.405168126  |
| Ti | 9.688964577  | 16.306885384 | 10.360623221 |
| Ti | 6.421845472  | 16.315905854 | 8.901266274  |
| Ti | -0.061498461 | 16.635919643 | 0.014410819  |

|    |              |              |              |
|----|--------------|--------------|--------------|
| Ti | 6.419376302  | 19.561133596 | 7.581189971  |
| Ti | 6.406686763  | 19.959560535 | 10.535403905 |
| Ti | 3.199790750  | 19.567126526 | 8.896792910  |
| Ti | 3.189793660  | 19.560787122 | 0.009482962  |
| Ti | 6.428732914  | 20.084013299 | 1.529491097  |
| Ti | 6.290533640  | 19.558341087 | 4.265249937  |
| Ti | 3.160049698  | 19.560083816 | 2.963916453  |
| Ti | 3.158489483  | 19.554512727 | 5.948040703  |
| Ti | -0.031740341 | 19.999577574 | 1.483023955  |
| Ti | -0.075856281 | 20.004741108 | 4.452125559  |
| Ti | 9.777246333  | 19.561038227 | 2.887170267  |
| Ti | 9.719852592  | 19.577371085 | 6.019561873  |
| Ti | -0.037840531 | 20.013397959 | 7.416440670  |
| Ti | -0.075548056 | 20.003675611 | 10.364864725 |
| Ti | 9.652756218  | 19.557993899 | 8.910514655  |
| Ti | 9.630221819  | 19.556101507 | -0.012454558 |
| O  | 0.000000000  | 1.266694833  | 2.957400000  |
| O  | 0.000000000  | 1.266694833  | 0.000000000  |
| O  | 0.000000000  | 1.266694833  | 8.872200000  |
| O  | 0.000000000  | 1.266694833  | 5.914800000  |
| O  | 6.494400000  | 1.266694833  | 2.957400000  |
| O  | 6.494400000  | 1.266694833  | 0.000000000  |

|   |              |             |              |
|---|--------------|-------------|--------------|
| O | 6.494400000  | 1.266694833 | 8.872200000  |
| O | 6.494400000  | 1.266694833 | 5.914800000  |
| O | 9.741600000  | 1.980495667 | 8.872200000  |
| O | 9.741600000  | 1.980495667 | 5.914800000  |
| O | 9.741600000  | 1.980495667 | 2.957400000  |
| O | 9.741600000  | 1.980495667 | 0.000000000  |
| O | 3.247200000  | 1.980495667 | 8.872200000  |
| O | 3.247200000  | 1.980495667 | 5.914800000  |
| O | 3.247200000  | 1.980495667 | 2.957400000  |
| O | 3.247200000  | 1.980495667 | 0.000000000  |
| O | 1.266698949  | 3.247194072 | 1.478700000  |
| O | 1.266698949  | 3.247194072 | 4.436100000  |
| O | 5.227599738  | 3.247194072 | 1.478700000  |
| O | 5.227599738  | 3.247194072 | 4.436100000  |
| O | 1.266698949  | 3.247194072 | 7.393500000  |
| O | 1.266698949  | 3.247194072 | 10.350900000 |
| O | 5.227599738  | 3.247194072 | 7.393500000  |
| O | 5.227599738  | 3.247194072 | 10.350900000 |
| O | 7.761098949  | 3.247194072 | 1.478700000  |
| O | 7.761098949  | 3.247194072 | 4.436100000  |
| O | 11.721999738 | 3.247194072 | 1.478700000  |
| O | 11.721999738 | 3.247194072 | 4.436100000  |



|   |              |             |              |
|---|--------------|-------------|--------------|
| O | 7.761098949  | 3.247194072 | 7.393500000  |
| O | 7.761098949  | 3.247194072 | 10.350900000 |
| O | 11.721999738 | 3.247194072 | 7.393500000  |
| O | 11.721999738 | 3.247194072 | 10.350900000 |
| O | 9.741600000  | 4.513896049 | 8.872200000  |
| O | 9.741600000  | 4.513896049 | 5.914800000  |
| O | 9.741600000  | 4.513896049 | 2.957400000  |
| O | 9.741600000  | 4.513896049 | 0.000000000  |
| O | 3.247200000  | 4.513896049 | 8.872200000  |
| O | 3.247200000  | 4.513896049 | 5.914800000  |
| O | 3.247200000  | 4.513896049 | 2.957400000  |
| O | 3.247200000  | 4.513896049 | 0.000000000  |
| O | 0.000000000  | 5.227596870 | 2.957400000  |
| O | 0.000000000  | 5.227596870 | 0.000000000  |
| O | 0.000000000  | 5.227596870 | 8.872200000  |
| O | 0.000000000  | 5.227596870 | 5.914800000  |
| O | 6.494400000  | 5.227596870 | 0.000000000  |
| O | 6.494400000  | 5.227596870 | 2.957400000  |
| O | 6.494400000  | 5.227596870 | 8.872200000  |
| O | 6.494400000  | 5.227596870 | 5.914800000  |
| O | 8.474899752  | 6.494391717 | 7.393500000  |
| O | 11.008298949 | 6.494391717 | 7.393500000  |

|   |              |             |              |
|---|--------------|-------------|--------------|
| O | 8.474899752  | 6.494391717 | 10.350900000 |
| O | 11.008298949 | 6.494391717 | 10.350900000 |
| O | 8.474899752  | 6.494391717 | 1.478700000  |
| O | 11.008298949 | 6.494391717 | 1.478700000  |
| O | 8.474899752  | 6.494391717 | 4.436100000  |
| O | 11.008298949 | 6.494391717 | 4.436100000  |
| O | 1.980499752  | 6.494391717 | 1.478700000  |
| O | 4.513898949  | 6.494391717 | 1.478700000  |
| O | 1.980499752  | 6.494391717 | 4.436100000  |
| O | 4.513898949  | 6.494391717 | 4.436100000  |
| O | 1.980499752  | 6.494391717 | 7.393500000  |
| O | 4.513898949  | 6.494391717 | 7.393500000  |
| O | 1.980499752  | 6.494391717 | 10.350900000 |
| O | 4.513898949  | 6.494391717 | 10.350900000 |
| O | 0.000000000  | 7.761086550 | 8.872200000  |
| O | 0.000000000  | 7.761086550 | 5.914800000  |
| O | 6.494400000  | 7.761086550 | 2.957400000  |
| O | 6.494400000  | 7.761086550 | 0.000000000  |
| O | 0.000000000  | 7.761086550 | 2.957400000  |
| O | 0.000000000  | 7.761086550 | 0.000000000  |
| O | 6.494400000  | 7.761086550 | 8.872200000  |
| O | 6.494400000  | 7.761086550 | 5.914800000  |

|   |              |             |              |
|---|--------------|-------------|--------------|
| O | 3.247200000  | 8.474887384 | 2.957400000  |
| O | 3.247200000  | 8.474887384 | 0.000000000  |
| O | 3.247200000  | 8.474887384 | 8.872200000  |
| O | 3.247200000  | 8.474887384 | 5.914800000  |
| O | 9.741600000  | 8.474887384 | 2.957400000  |
| O | 9.741600000  | 8.474887384 | 0.000000000  |
| O | 9.741600000  | 8.474887384 | 8.872200000  |
| O | 9.741600000  | 8.474887384 | 5.914800000  |
| O | 1.268761830  | 9.788939147 | 1.482300102  |
| O | 1.268263450  | 9.788538737 | 4.439304639  |
| O | 5.210730534  | 9.772465556 | 1.482406569  |
| O | 5.210709362  | 9.772070147 | 4.442241573  |
| O | 1.269339962  | 9.788259415 | 7.395911346  |
| O | 1.269833926  | 9.789617093 | 10.354374472 |
| O | 5.211578443  | 9.771666166 | 7.399852495  |
| O | 5.211536489  | 9.772734877 | 10.357609867 |
| O | 7.758892542  | 9.782044314 | 1.483294735  |
| O | 7.757850190  | 9.781749989 | 4.441916969  |
| O | 11.700480154 | 9.778762811 | 1.481478891  |
| O | 11.699654196 | 9.778464201 | 4.439504559  |
| O | 7.759140498  | 9.780990961 | 7.398408219  |
| O | 7.760115048  | 9.781901080 | 10.358177688 |

|   |              |              |              |
|---|--------------|--------------|--------------|
| O | 11.700849036 | 9.778362045  | 7.397517450  |
| O | 11.701440416 | 9.779270021  | 10.353841903 |
| O | 9.725299576  | 11.071053504 | 2.960355744  |
| O | 9.723889641  | 11.070207679 | 0.003279638  |
| O | 3.243107229  | 11.069298988 | 2.959836424  |
| O | 3.244346361  | 11.071121370 | 0.002620611  |
| O | 3.243766281  | 11.069622959 | 8.874029566  |
| O | 3.243359991  | 11.070249113 | 5.917391865  |
| O | 9.725140333  | 11.069583311 | 8.874839302  |
| O | 9.724153184  | 11.071750739 | 5.918491545  |
| O | 6.461437933  | 11.793586199 | 8.887948155  |
| O | -0.033085331 | 11.799172289 | 2.960024515  |
| O | 6.461794215  | 11.806082482 | 0.006635104  |
| O | 6.461098146  | 11.788672339 | 5.923112305  |
| O | -0.032923491 | 11.798930829 | 0.003199079  |
| O | -0.032966484 | 11.798956189 | 5.917005274  |
| O | 6.460140092  | 11.792438191 | 2.955457106  |
| O | -0.032177024 | 11.798974049 | 8.873682485  |
| O | 8.432519636  | 13.094114044 | 1.489701291  |
| O | 8.428052787  | 13.087001682 | 4.443450440  |
| O | 10.964823098 | 13.115351117 | 1.485473629  |
| O | 10.964341473 | 13.117229578 | 4.444392431  |

|   |              |              |              |
|---|--------------|--------------|--------------|
| O | 1.953726328  | 13.092079491 | 1.485008371  |
| O | 1.954516697  | 13.094736269 | 4.442163261  |
| O | 4.486996027  | 13.115367191 | 1.487182415  |
| O | 4.491203879  | 13.105758430 | 4.442620949  |
| O | 1.954810373  | 13.094889503 | 7.397929239  |
| O | 1.954062998  | 13.090827898 | 10.354950928 |
| O | 4.491298047  | 13.108537366 | 7.398014649  |
| O | 4.487047203  | 13.114541368 | 10.354055901 |
| O | 8.428055775  | 13.090045296 | 7.400242162  |
| O | 8.432570552  | 13.092765296 | 10.353768441 |
| O | 10.964105466 | 13.117974676 | 7.397830462  |
| O | 10.965134959 | 13.113375501 | 10.357459513 |
| O | -0.036983400 | 14.411779853 | 2.970113271  |
| O | -0.034784396 | 14.410863662 | 5.927835983  |
| O | -0.036465536 | 14.410616129 | 8.885660784  |
| O | -0.034028188 | 14.411684126 | 0.012989137  |
| O | 6.454478014  | 14.405113978 | 2.979224192  |
| O | 6.458741068  | 14.400905926 | 5.920271900  |
| O | 6.452666596  | 14.407203896 | 8.869273475  |
| O | 6.462880728  | 14.415723228 | 0.010279094  |
| O | 9.674598314  | 15.108872065 | 8.882392620  |
| O | 3.191926941  | 15.110277607 | 8.882542738  |

|   |              |              |              |
|---|--------------|--------------|--------------|
| O | 9.664782678  | 15.113251926 | 5.923625946  |
| O | 9.671980162  | 15.112253938 | 2.976071722  |
| O | 3.192644832  | 15.108973150 | 2.972503797  |
| O | 9.680568356  | 15.107662978 | 0.010032684  |
| O | 3.175777187  | 15.108757408 | 0.009826849  |
| O | 3.195136344  | 15.108990295 | 5.925294275  |
| O | 1.223887864  | 16.478732583 | 10.360785287 |
| O | 5.156575811  | 16.481650109 | 4.455332090  |
| O | 5.157137317  | 16.465800171 | 7.394920380  |
| O | 7.713986883  | 16.449540537 | 1.488826966  |
| O | 7.707917866  | 16.479439818 | 4.443214676  |
| O | 5.150591221  | 16.439741036 | 10.377780755 |
| O | 11.635208187 | 16.469777836 | 1.491231687  |
| O | 11.634294425 | 16.458644589 | 4.455245261  |
| O | 1.222692895  | 16.475507517 | 4.450526789  |
| O | 1.222261667  | 16.477462059 | 1.498094747  |
| O | 5.149958147  | 16.430394810 | 1.477424059  |
| O | 7.705804588  | 16.467831509 | 7.405480073  |
| O | 7.711180783  | 16.442498184 | 10.369630279 |
| O | 1.223080870  | 16.471618078 | 7.406891462  |
| O | 11.632588216 | 16.466103068 | 7.406138745  |
| O | 11.637664369 | 16.469301702 | 10.365333886 |

|   |              |              |              |
|---|--------------|--------------|--------------|
| O | 3.204134854  | 17.741462967 | 8.882709535  |
| O | 3.207248659  | 17.737589244 | 0.014789484  |
| O | 9.660953190  | 17.751913982 | 2.975142626  |
| O | 9.653248104  | 17.763187247 | 5.929732149  |
| O | 3.197310149  | 17.738502221 | 2.969532911  |
| O | 3.180628503  | 17.737727834 | 5.932612184  |
| O | 9.647996862  | 17.735056055 | 8.883144746  |
| O | 9.640332301  | 17.734727083 | 0.009894277  |
| O | 6.442773157  | 18.571487628 | 0.025737424  |
| O | 6.497524846  | 18.658868740 | 5.938264603  |
| O | -0.055948217 | 18.510238160 | 0.014859989  |
| O | 6.407935637  | 18.454790525 | 2.859779183  |
| O | -0.084068319 | 18.518161700 | 5.929912077  |
| O | 6.425104622  | 18.450345655 | 8.979493407  |
| O | -0.066260285 | 18.517244436 | 8.877766773  |
| O | -0.094736151 | 18.510957183 | 2.988317961  |
| O | 1.953740486  | 19.956056504 | 4.456926721  |
| O | 4.420314775  | 19.976959962 | 1.506869826  |
| O | 4.423229851  | 19.941470661 | 4.479864197  |
| O | 1.978707687  | 19.976665638 | 7.423179638  |
| O | 1.967497963  | 19.931084298 | 10.360937770 |
| O | 4.488085398  | 19.936912920 | 7.387109887  |

|   |              |              |              |
|---|--------------|--------------|--------------|
| O | 4.446378101  | 19.979953926 | 10.357906554 |
| O | 8.446981366  | 19.990128833 | 1.530754499  |
| O | 8.334526803  | 20.175621395 | 4.521690823  |
| O | 10.920334639 | 19.910792706 | 1.448447336  |
| O | 10.814372398 | 20.001631415 | 4.463709577  |
| O | 8.379605343  | 20.021735839 | 7.409004702  |
| O | 8.401419513  | 20.025195222 | 10.345474472 |
| O | 10.894374964 | 19.967503721 | 7.438105754  |
| O | 10.892226486 | 19.924507006 | 10.368604534 |
| O | 1.957056527  | 19.931016789 | 1.491131017  |
| O | -0.061872409 | 21.118420143 | 0.014513145  |
| O | 6.431760992  | 21.049664690 | 3.112113778  |
| O | -0.092972921 | 21.109527905 | 2.970374469  |
| O | -0.086915335 | 21.118773761 | 5.930501665  |
| O | -0.068497606 | 21.124355565 | 8.890636550  |
| O | 6.412661482  | 21.158196078 | 8.812264858  |
| O | 6.432475376  | 21.205122238 | 0.042495235  |
| H | 0.000000000  | 0.932897449  | 9.814799089  |
| H | 0.816399334  | 0.932897449  | 8.400899272  |
| H | 6.457698847  | 0.932897449  | 6.856699960  |
| H | 0.834099172  | 0.932897449  | -0.439201108 |
| H | 0.000000000  | 0.932897449  | 3.899999089  |



|   |              |              |              |
|---|--------------|--------------|--------------|
| H | 0.816399334  | 0.932897449  | 2.486099272  |
| H | 6.457698847  | 0.932897449  | 0.941899960  |
| H | 0.834099172  | 0.932897449  | 5.475598892  |
| H | 6.494400000  | 0.932897449  | 9.814799089  |
| H | 7.310799334  | 0.932897449  | 8.400899272  |
| H | -0.036701153 | 0.932897449  | 6.856699960  |
| H | 7.328499172  | 0.932897449  | -0.439201108 |
| H | 6.494400000  | 0.932897449  | 3.899999089  |
| H | 7.310799334  | 0.932897449  | 2.486099272  |
| H | -0.036701153 | 0.932897449  | 0.941899960  |
| H | 7.328499172  | 0.932897449  | 5.475598892  |
| H | 8.212738489  | 21.123040035 | 4.305448929  |
| H | 7.240173643  | 21.673734460 | 8.788371432  |

TS7-B2:

|    |             |             |              |
|----|-------------|-------------|--------------|
| Ti | 3.247200000 | 3.247190143 | 1.478700000  |
| Ti | 3.247200000 | 3.247190143 | 4.436100000  |
| Ti | 0.000000000 | 3.247190143 | 2.957400000  |
| Ti | 0.000000000 | 3.247190143 | 0.000000000  |
| Ti | 3.247200000 | 3.247190143 | 7.393500000  |
| Ti | 3.247200000 | 3.247190143 | 10.350900000 |
| Ti | 0.000000000 | 3.247190143 | 8.872200000  |
| Ti | 0.000000000 | 3.247190143 | 5.914800000  |

|    |             |             |              |
|----|-------------|-------------|--------------|
| Ti | 9.741600000 | 3.247190143 | 1.478700000  |
| Ti | 9.741600000 | 3.247190143 | 4.436100000  |
| Ti | 6.494400000 | 3.247190143 | 2.957400000  |
| Ti | 6.494400000 | 3.247190143 | 0.000000000  |
| Ti | 9.741600000 | 3.247190143 | 7.393500000  |
| Ti | 9.741600000 | 3.247190143 | 10.350900000 |
| Ti | 6.494400000 | 3.247190143 | 8.872200000  |
| Ti | 6.494400000 | 3.247190143 | 5.914800000  |
| Ti | 0.000000000 | 6.494389931 | 4.436100000  |
| Ti | 0.000000000 | 6.494389931 | 1.478700000  |
| Ti | 3.247200000 | 6.494389931 | 2.957400000  |
| Ti | 3.247200000 | 6.494389931 | 0.000000000  |
| Ti | 0.000000000 | 6.494389931 | 10.350900000 |
| Ti | 0.000000000 | 6.494389931 | 7.393500000  |
| Ti | 3.247200000 | 6.494389931 | 8.872200000  |
| Ti | 3.247200000 | 6.494389931 | 5.914800000  |
| Ti | 6.494400000 | 6.494389931 | 4.436100000  |
| Ti | 6.494400000 | 6.494389931 | 1.478700000  |
| Ti | 9.741600000 | 6.494389931 | 2.957400000  |
| Ti | 9.741600000 | 6.494389931 | 0.000000000  |
| Ti | 6.494400000 | 6.494389931 | 10.350900000 |
| Ti | 6.494400000 | 6.494389931 | 7.393500000  |

|    |              |              |              |
|----|--------------|--------------|--------------|
| Ti | 9.741600000  | 6.494389931  | 8.872200000  |
| Ti | 9.741600000  | 6.494389931  | 5.914800000  |
| Ti | 3.224745742  | 9.738144623  | 1.478477249  |
| Ti | 3.226164638  | 9.738125335  | 4.436400708  |
| Ti | -0.014914260 | 9.837856639  | 2.962430419  |
| Ti | -0.012803839 | 9.838269193  | 0.002994782  |
| Ti | 3.226563265  | 9.737959599  | 7.393639353  |
| Ti | 3.226108267  | 9.738288928  | 10.351374958 |
| Ti | -0.011421312 | 9.837737695  | 8.873428504  |
| Ti | -0.016072081 | 9.837375862  | 5.918005940  |
| Ti | 9.740212926  | 9.732713196  | 1.486972203  |
| Ti | 9.733281193  | 9.747541571  | 4.442278837  |
| Ti | 6.480870866  | 9.759054867  | 2.964037825  |
| Ti | 6.482302362  | 9.762454957  | 0.011848409  |
| Ti | 9.735502798  | 9.751440297  | 7.392253515  |
| Ti | 9.742243335  | 9.733867990  | 10.345158149 |
| Ti | 6.483602281  | 9.755668352  | 8.889524567  |
| Ti | 6.478238556  | 9.732287425  | 5.927338903  |
| Ti | -0.034628920 | 13.175785478 | 1.513269995  |
| Ti | -0.032732815 | 13.178226870 | 4.471735014  |
| Ti | 3.211690699  | 12.993843383 | 2.957227406  |
| Ti | 3.210798109  | 12.995778280 | 5.914928588  |

|    |              |              |              |
|----|--------------|--------------|--------------|
| Ti | 6.461883319  | 13.141008771 | 1.438929949  |
| Ti | 6.458696257  | 13.012443681 | 4.407541926  |
| Ti | 9.707940304  | 13.010038723 | 2.964445710  |
| Ti | 9.709369981  | 13.018111925 | 5.919420405  |
| Ti | -0.032690861 | 13.178790873 | 7.426194412  |
| Ti | -0.035304078 | 13.176452709 | 10.382811647 |
| Ti | 3.211670566  | 12.993540129 | 8.873068411  |
| Ti | 3.209804595  | 12.995600042 | 0.000439351  |
| Ti | 6.457975118  | 13.002263774 | 7.422883662  |
| Ti | 6.459667299  | 13.122731372 | 10.404305084 |
| Ti | 9.705979905  | 13.015102245 | 8.873639781  |
| Ti | 9.711193349  | 12.979201818 | 0.003722657  |
| Ti | 9.701918307  | 16.281772445 | 1.498149519  |
| Ti | 9.694651593  | 16.373667364 | 4.469077494  |
| Ti | 6.434236008  | 16.340690892 | 2.941569984  |
| Ti | -0.052558530 | 16.655489712 | 5.922387979  |
| Ti | 3.176225690  | 16.313328372 | 1.481781729  |
| Ti | 3.182853874  | 16.319595981 | 4.439626404  |
| Ti | -0.058609752 | 16.643746742 | 2.966134385  |
| Ti | 6.444690044  | 16.261622300 | 5.916236232  |
| Ti | 3.190649233  | 16.317982912 | 7.398808533  |
| Ti | 3.173665987  | 16.314397799 | 10.356731756 |

|    |              |              |              |
|----|--------------|--------------|--------------|
| Ti | -0.053735964 | 16.648807049 | 8.872654966  |
| Ti | 6.443424156  | 16.643698879 | 0.003081847  |
| Ti | 9.686020665  | 16.371949638 | 7.355609200  |
| Ti | 9.705466327  | 16.285277548 | 10.341745664 |
| Ti | 6.436072365  | 16.310555151 | 8.896029428  |
| Ti | -0.053927679 | 16.640580969 | 0.006002102  |
| Ti | 6.413568360  | 19.591127890 | 4.228144031  |
| Ti | 6.415598509  | 19.987536350 | 10.505292013 |
| Ti | 3.179497698  | 19.569016417 | 2.969075224  |
| Ti | 3.207309707  | 19.564050051 | 5.916577161  |
| Ti | 3.210702641  | 19.573015156 | 8.880941838  |
| Ti | 6.436953655  | 19.554878132 | 7.563524475  |
| Ti | 9.684074034  | 19.553321500 | 2.957008677  |
| Ti | 3.177074898  | 19.564004688 | 0.011156377  |
| Ti | -0.098840352 | 20.021854426 | 4.448536222  |
| Ti | -0.069832075 | 20.004517508 | 1.489255552  |
| Ti | 9.668831027  | 19.562398048 | 8.937207437  |
| Ti | 9.775611433  | 19.678040370 | 6.039245972  |
| Ti | -0.013927241 | 20.027973801 | 7.420124762  |
| Ti | -0.066845690 | 20.005286894 | 10.365799854 |
| Ti | 9.665835550  | 19.541289920 | 0.040573990  |
| Ti | 6.419243946  | 20.095651255 | 1.504081945  |

|   |             |             |              |
|---|-------------|-------------|--------------|
| O | 0.000000000 | 1.266689833 | 2.957400000  |
| O | 0.000000000 | 1.266689833 | 0.000000000  |
| O | 0.000000000 | 1.266689833 | 8.872200000  |
| O | 0.000000000 | 1.266689833 | 5.914800000  |
| O | 6.494400000 | 1.266689833 | 2.957400000  |
| O | 6.494400000 | 1.266689833 | 0.000000000  |
| O | 6.494400000 | 1.266689833 | 8.872200000  |
| O | 6.494400000 | 1.266689833 | 5.914800000  |
| O | 9.741600000 | 1.980499953 | 8.872200000  |
| O | 9.741600000 | 1.980499953 | 5.914800000  |
| O | 9.741600000 | 1.980499953 | 2.957400000  |
| O | 9.741600000 | 1.980499953 | 0.000000000  |
| O | 3.247200000 | 1.980499953 | 8.872200000  |
| O | 3.247200000 | 1.980499953 | 5.914800000  |
| O | 3.247200000 | 1.980499953 | 2.957400000  |
| O | 3.247200000 | 1.980499953 | 0.000000000  |
| O | 1.266699988 | 3.247190143 | 1.478700000  |
| O | 1.266699988 | 3.247190143 | 4.436100000  |
| O | 5.227599998 | 3.247190143 | 1.478700000  |
| O | 5.227599998 | 3.247190143 | 4.436100000  |
| O | 1.266699988 | 3.247190143 | 7.393500000  |
| O | 1.266699988 | 3.247190143 | 10.350900000 |

|   |              |             |              |
|---|--------------|-------------|--------------|
| O | 5.227599998  | 3.247190143 | 7.393500000  |
| O | 5.227599998  | 3.247190143 | 10.350900000 |
| O | 7.761099988  | 3.247190143 | 1.478700000  |
| O | 7.761099988  | 3.247190143 | 4.436100000  |
| O | 11.721999998 | 3.247190143 | 1.478700000  |
| O | 11.721999998 | 3.247190143 | 4.436100000  |
| O | 7.761099988  | 3.247190143 | 7.393500000  |
| O | 7.761099988  | 3.247190143 | 10.350900000 |
| O | 11.721999998 | 3.247190143 | 7.393500000  |
| O | 11.721999998 | 3.247190143 | 10.350900000 |
| O | 9.741600000  | 4.513899978 | 8.872200000  |
| O | 9.741600000  | 4.513899978 | 5.914800000  |
| O | 9.741600000  | 4.513899978 | 2.957400000  |
| O | 9.741600000  | 4.513899978 | 0.000000000  |
| O | 3.247200000  | 4.513899978 | 8.872200000  |
| O | 3.247200000  | 4.513899978 | 5.914800000  |
| O | 3.247200000  | 4.513899978 | 2.957400000  |
| O | 3.247200000  | 4.513899978 | 0.000000000  |
| O | 0.000000000  | 5.227600085 | 2.957400000  |
| O | 0.000000000  | 5.227600085 | 0.000000000  |
| O | 0.000000000  | 5.227600085 | 8.872200000  |
| O | 0.000000000  | 5.227600085 | 5.914800000  |

|   |              |             |              |
|---|--------------|-------------|--------------|
| O | 6.494400000  | 5.227600085 | 0.000000000  |
| O | 6.494400000  | 5.227600085 | 2.957400000  |
| O | 6.494400000  | 5.227600085 | 8.872200000  |
| O | 6.494400000  | 5.227600085 | 5.914800000  |
| O | 8.474900012  | 6.494389931 | 7.393500000  |
| O | 11.008299988 | 6.494389931 | 7.393500000  |
| O | 8.474900012  | 6.494389931 | 10.350900000 |
| O | 11.008299988 | 6.494389931 | 10.350900000 |
| O | 8.474900012  | 6.494389931 | 1.478700000  |
| O | 11.008299988 | 6.494389931 | 1.478700000  |
| O | 8.474900012  | 6.494389931 | 4.436100000  |
| O | 11.008299988 | 6.494389931 | 4.436100000  |
| O | 1.980500012  | 6.494389931 | 1.478700000  |
| O | 4.513899988  | 6.494389931 | 1.478700000  |
| O | 1.980500012  | 6.494389931 | 4.436100000  |
| O | 4.513899988  | 6.494389931 | 4.436100000  |
| O | 1.980500012  | 6.494389931 | 7.393500000  |
| O | 4.513899988  | 6.494389931 | 7.393500000  |
| O | 1.980500012  | 6.494389931 | 10.350900000 |
| O | 4.513899988  | 6.494389931 | 10.350900000 |
| O | 0.000000000  | 7.761090122 | 8.872200000  |
| O | 0.000000000  | 7.761090122 | 5.914800000  |



|   |             |             |              |
|---|-------------|-------------|--------------|
| O | 6.494400000 | 7.761090122 | 2.957400000  |
| O | 6.494400000 | 7.761090122 | 0.000000000  |
| O | 0.000000000 | 7.761090122 | 2.957400000  |
| O | 0.000000000 | 7.761090122 | 0.000000000  |
| O | 6.494400000 | 7.761090122 | 8.872200000  |
| O | 6.494400000 | 7.761090122 | 5.914800000  |
| O | 3.247200000 | 8.474889884 | 2.957400000  |
| O | 3.247200000 | 8.474889884 | 0.000000000  |
| O | 3.247200000 | 8.474889884 | 8.872200000  |
| O | 3.247200000 | 8.474889884 | 5.914800000  |
| O | 9.741600000 | 8.474889884 | 2.957400000  |
| O | 9.741600000 | 8.474889884 | 0.000000000  |
| O | 9.741600000 | 8.474889884 | 8.872200000  |
| O | 9.741600000 | 8.474889884 | 5.914800000  |
| O | 1.269046545 | 9.786716355 | 1.480383234  |
| O | 1.268472700 | 9.785617283 | 4.437706933  |
| O | 5.211123316 | 9.774097556 | 1.483108774  |
| O | 5.210678579 | 9.773286021 | 4.440950373  |
| O | 1.268871066 | 9.784962554 | 7.394164232  |
| O | 1.269682217 | 9.786658491 | 10.352356934 |
| O | 5.211023432 | 9.772466985 | 7.398505814  |
| O | 5.211401016 | 9.773968968 | 10.356125844 |

|   |              |              |              |
|---|--------------|--------------|--------------|
| O | 7.758442869  | 9.782615460  | 1.482201207  |
| O | 7.757128403  | 9.782191119  | 4.441960384  |
| O | 11.700033080 | 9.777506932  | 1.479736036  |
| O | 11.699386627 | 9.777987352  | 4.437631933  |
| O | 7.757637694  | 9.781954659  | 7.396413985  |
| O | 7.758939821  | 9.782461511  | 10.357270121 |
| O | 11.700004374 | 9.778203452  | 7.395619746  |
| O | 11.700617706 | 9.777768395  | 10.352238401 |
| O | 9.723489456  | 11.073812081 | 2.958954291  |
| O | 9.723802616  | 11.068612112 | 0.002187056  |
| O | 3.241699503  | 11.070828475 | 2.959923372  |
| O | 3.243399867  | 11.071213168 | 0.001581381  |
| O | 3.241866019  | 11.070443781 | 8.872135410  |
| O | 3.241850822  | 11.071493205 | 5.916344827  |
| O | 9.723084595  | 11.075022597 | 8.874671913  |
| O | 9.723203053  | 11.076877483 | 5.917118720  |
| O | 6.462842671  | 11.792563207 | 8.881317073  |
| O | -0.030526667 | 11.794987097 | 2.957475709  |
| O | 6.462057498  | 11.805990327 | 0.005607112  |
| O | 6.460941631  | 11.792836814 | 5.917509688  |
| O | -0.031800869 | 11.794442382 | -0.000024487 |
| O | -0.029713179 | 11.795127115 | 5.914339237  |

|   |              |              |              |
|---|--------------|--------------|--------------|
| O | 6.463087900  | 11.796681962 | 2.954955177  |
| O | -0.030107779 | 11.794544539 | 8.870780448  |
| O | 8.433885018  | 13.096902624 | 1.485503321  |
| O | 8.428680016  | 13.094109758 | 4.443023037  |
| O | 10.965380317 | 13.114770684 | 1.483576516  |
| O | 10.965525922 | 13.114935706 | 4.442445043  |
| O | 1.955993004  | 13.094254777 | 1.482680779  |
| O | 1.956976646  | 13.098820733 | 4.439989336  |
| O | 4.487490770  | 13.112915798 | 1.484929586  |
| O | 4.491935148  | 13.108487002 | 4.441096113  |
| O | 1.957197585  | 13.098791801 | 7.395289937  |
| O | 1.955943646  | 13.092438110 | 10.352353503 |
| O | 4.492393133  | 13.108590944 | 7.395139464  |
| O | 4.487526879  | 13.111113775 | 10.350174254 |
| O | 8.427933160  | 13.093783644 | 7.396308347  |
| O | 8.433600823  | 13.095208831 | 10.351175275 |
| O | 10.965351742 | 13.116261594 | 7.395939382  |
| O | 10.965314983 | 13.113914857 | 10.353740997 |
| O | -0.032086363 | 14.405899081 | 2.968099991  |
| O | -0.031561615 | 14.406673469 | 5.925052005  |
| O | -0.032042071 | 14.405273999 | 8.881979294  |
| O | -0.030594079 | 14.404191714 | 0.009656502  |

|   |              |              |              |
|---|--------------|--------------|--------------|
| O | 6.452520342  | 14.413033232 | 2.970937794  |
| O | 6.460315051  | 14.405410803 | 5.919090951  |
| O | 6.454905735  | 14.405227565 | 8.866641981  |
| O | 6.463858136  | 14.406736691 | -0.000010528 |
| O | 9.678570289  | 15.120293207 | 8.865093131  |
| O | 3.202915855  | 15.114212052 | 8.875455861  |
| O | 9.679049706  | 15.119129483 | 5.919802501  |
| O | 9.675585983  | 15.114461013 | 2.976719393  |
| O | 3.204296565  | 15.114174904 | 2.965583599  |
| O | 9.686499952  | 15.103955706 | 0.000935958  |
| O | 3.186178747  | 15.109124241 | 0.003354756  |
| O | 3.203692066  | 15.115577588 | 5.918868081  |
| O | 1.234512833  | 16.469122393 | 10.356300804 |
| O | 5.163477670  | 16.480517103 | 4.448208069  |
| O | 5.163948773  | 16.464000649 | 7.392511755  |
| O | 7.716159649  | 16.452524500 | 1.469477526  |
| O | 7.701465290  | 16.478208228 | 4.430861853  |
| O | 5.159649221  | 16.442656062 | 10.370289542 |
| O | 11.652326646 | 16.456726837 | 1.484024976  |
| O | 11.656440199 | 16.462656901 | 4.449507432  |
| O | 1.235598437  | 16.480698912 | 4.443624217  |
| O | 1.233708047  | 16.474679551 | 1.489563358  |

|   |              |              |              |
|---|--------------|--------------|--------------|
| O | 5.158164601  | 16.433602731 | 1.456169344  |
| O | 7.704283340  | 16.474445592 | 7.403697352  |
| O | 7.716349805  | 16.450019171 | 10.363637640 |
| O | 1.235929521  | 16.472870385 | 7.398284482  |
| O | 11.653720994 | 16.475106035 | 7.400598588  |
| O | 11.652741378 | 16.463294485 | 10.355573520 |
| O | 3.211846305  | 17.746522917 | 8.878340864  |
| O | 3.212690577  | 17.739424128 | 0.005109559  |
| O | 9.678662120  | 17.721765382 | 2.961249470  |
| O | 9.657404910  | 17.750490223 | 5.915522789  |
| O | 3.212399628  | 17.743322140 | 2.960735119  |
| O | 3.197881397  | 17.742653838 | 5.926128616  |
| O | 9.662427159  | 17.741088275 | 8.892173452  |
| O | 9.660960464  | 17.720664523 | 0.010158432  |
| O | 6.429984125  | 18.581518230 | -0.008103986 |
| O | 6.472357097  | 18.671752574 | 5.932924840  |
| O | -0.048313660 | 18.505000686 | 0.006772091  |
| O | 6.394841238  | 18.458761403 | 2.821379119  |
| O | -0.078821494 | 18.528815241 | 5.933680278  |
| O | 6.422991734  | 18.452607738 | 8.964955302  |
| O | -0.038712859 | 18.516950469 | 8.879460535  |
| O | -0.079907877 | 18.512484883 | 2.976683904  |

|   |              |              |              |
|---|--------------|--------------|--------------|
| O | 1.977630007  | 19.941258133 | 4.449873440  |
| O | 4.408843197  | 19.986437635 | 1.477271339  |
| O | 4.456381425  | 19.923795841 | 4.464960084  |
| O | 2.006740505  | 19.977023899 | 7.407188622  |
| O | 1.983117515  | 19.932852387 | 10.352375624 |
| O | 4.493640318  | 19.949560294 | 7.395311348  |
| O | 4.444986871  | 19.979753900 | 10.350447518 |
| O | 8.422337715  | 19.962006213 | 1.474023168  |
| O | 8.372467348  | 19.963147792 | 4.348337026  |
| O | 10.907482222 | 19.925494635 | 1.459760337  |
| O | 10.872729518 | 20.030728448 | 4.438646203  |
| O | 8.406675690  | 19.968347403 | 7.438278821  |
| O | 8.424679596  | 20.009846421 | 10.361057013 |
| O | 10.925598220 | 19.999179664 | 7.518305119  |
| O | 10.903887181 | 19.920875458 | 10.377792348 |
| O | 1.960885625  | 19.907260456 | 1.489781851  |
| O | -0.047011663 | 21.115954105 | 0.012088195  |
| O | 6.396027894  | 21.061388014 | 3.056498334  |
| O | -0.043747318 | 21.119486355 | 2.961334643  |
| O | -0.055879506 | 21.125666451 | 5.934236388  |
| O | -0.024142932 | 21.131652951 | 8.900055277  |
| O | 6.429107640  | 21.163983266 | 8.795733702  |

|   |              |              |              |
|---|--------------|--------------|--------------|
| O | 6.428583283  | 21.221618331 | 0.005285938  |
| H | 0.000000000  | 0.932899949  | 9.814800036  |
| H | 0.816399984  | 0.932899949  | 8.400899982  |
| H | 6.457700016  | 0.932899949  | 6.856699960  |
| H | 0.834099951  | 0.932899949  | -0.439200043 |
| H | 0.000000000  | 0.932899949  | 3.900000036  |
| H | 0.816399984  | 0.932899949  | 2.486099982  |
| H | 6.457700016  | 0.932899949  | 0.941899960  |
| H | 0.834099951  | 0.932899949  | 5.475599957  |
| H | 6.494400000  | 0.932899949  | 9.814800036  |
| H | 7.310799984  | 0.932899949  | 8.400899982  |
| H | -0.036699984 | 0.932899949  | 6.856699960  |
| H | 7.328499951  | 0.932899949  | -0.439200043 |
| H | 6.494400000  | 0.932899949  | 3.900000036  |
| H | 7.310799984  | 0.932899949  | 2.486099982  |
| H | -0.036699984 | 0.932899949  | 0.941899960  |
| H | 7.328499951  | 0.932899949  | 5.475599957  |
| H | 8.862340979  | 20.934621018 | 5.132406344  |
| H | 7.233189176  | 21.713911520 | 8.765389714  |

7-Bc:

|    |             |             |             |
|----|-------------|-------------|-------------|
| Ti | 3.247200000 | 3.247194072 | 1.478700000 |
| Ti | 3.247200000 | 3.247194072 | 4.436100000 |

|    |             |             |              |
|----|-------------|-------------|--------------|
| Ti | 0.000000000 | 3.247194072 | 2.957400000  |
| Ti | 0.000000000 | 3.247194072 | 0.000000000  |
| Ti | 3.247200000 | 3.247194072 | 7.393500000  |
| Ti | 3.247200000 | 3.247194072 | 10.350900000 |
| Ti | 0.000000000 | 3.247194072 | 8.872200000  |
| Ti | 0.000000000 | 3.247194072 | 5.914800000  |
| Ti | 9.741600000 | 3.247194072 | 1.478700000  |
| Ti | 9.741600000 | 3.247194072 | 4.436100000  |
| Ti | 6.494400000 | 3.247194072 | 2.957400000  |
| Ti | 6.494400000 | 3.247194072 | 0.000000000  |
| Ti | 9.741600000 | 3.247194072 | 7.393500000  |
| Ti | 9.741600000 | 3.247194072 | 10.350900000 |
| Ti | 6.494400000 | 3.247194072 | 8.872200000  |
| Ti | 6.494400000 | 3.247194072 | 5.914800000  |
| Ti | 0.000000000 | 6.494391717 | 4.436100000  |
| Ti | 0.000000000 | 6.494391717 | 1.478700000  |
| Ti | 3.247200000 | 6.494391717 | 2.957400000  |
| Ti | 3.247200000 | 6.494391717 | 0.000000000  |
| Ti | 0.000000000 | 6.494391717 | 10.350900000 |
| Ti | 0.000000000 | 6.494391717 | 7.393500000  |
| Ti | 3.247200000 | 6.494391717 | 8.872200000  |
| Ti | 3.247200000 | 6.494391717 | 5.914800000  |



|    |              |             |              |
|----|--------------|-------------|--------------|
| Ti | 6.494400000  | 6.494391717 | 4.436100000  |
| Ti | 6.494400000  | 6.494391717 | 1.478700000  |
| Ti | 9.741600000  | 6.494391717 | 2.957400000  |
| Ti | 9.741600000  | 6.494391717 | 0.000000000  |
| Ti | 6.494400000  | 6.494391717 | 10.350900000 |
| Ti | 6.494400000  | 6.494391717 | 7.393500000  |
| Ti | 9.741600000  | 6.494391717 | 8.872200000  |
| Ti | 9.741600000  | 6.494391717 | 5.914800000  |
| Ti | 3.225090724  | 9.737974601 | 1.478988761  |
| Ti | 3.226473642  | 9.738023178 | 4.436239826  |
| Ti | -0.015330551 | 9.837848067 | 2.963980806  |
| Ti | -0.012310395 | 9.837499450 | 0.004963345  |
| Ti | 3.227177765  | 9.738442519 | 7.393720622  |
| Ti | 3.226220101  | 9.738220704 | 10.351377324 |
| Ti | -0.011233364 | 9.837482304 | 8.874634058  |
| Ti | -0.016415895 | 9.836931161 | 5.919244854  |
| Ti | 9.740259946  | 9.733066814 | 1.487296452  |
| Ti | 9.732399384  | 9.752912633 | 4.438857835  |
| Ti | 6.480735782  | 9.759392412 | 2.964226626  |
| Ti | 6.482346004  | 9.758841982 | 0.011021047  |
| Ti | 9.736015855  | 9.751212410 | 7.390525920  |
| Ti | 9.743058772  | 9.733219691 | 10.342618689 |

|    |              |              |              |
|----|--------------|--------------|--------------|
| Ti | 6.485065339  | 9.757852567  | 8.889103670  |
| Ti | 6.477833305  | 9.731653057  | 5.927629083  |
| Ti | -0.035874156 | 13.175005376 | 1.513461280  |
| Ti | -0.032978174 | 13.176286615 | 4.470962896  |
| Ti | 3.210790445  | 12.994998177 | 2.957502089  |
| Ti | 3.210480792  | 12.996150114 | 5.915398459  |
| Ti | 6.460384801  | 13.132377638 | 1.438293635  |
| Ti | 6.456912245  | 13.011464267 | 4.416626467  |
| Ti | 9.706310729  | 13.024759584 | 2.967097551  |
| Ti | 9.708775874  | 13.023658368 | 5.920898987  |
| Ti | -0.032744245 | 13.176089090 | 7.427624611  |
| Ti | -0.035970144 | 13.174984659 | 10.385125162 |
| Ti | 3.211424688  | 12.995127480 | 8.874267223  |
| Ti | 3.209203993  | 12.995701127 | 0.001525545  |
| Ti | 6.457339187  | 13.007163703 | 7.426159869  |
| Ti | 6.459228668  | 13.124865223 | 10.406252355 |
| Ti | 9.705579720  | 13.022987208 | 8.874795769  |
| Ti | 9.710876422  | 12.975440253 | 0.006713653  |
| Ti | 9.694829799  | 16.263959750 | 1.521470392  |
| Ti | 9.684121832  | 16.420049880 | 4.526414264  |
| Ti | 6.430432498  | 16.322951064 | 2.948559385  |
| Ti | -0.056251375 | 16.641802201 | 5.927913821  |

|    |              |              |              |
|----|--------------|--------------|--------------|
| Ti | 3.168345775  | 16.315793696 | 1.485420869  |
| Ti | 3.179105307  | 16.319090915 | 4.443702529  |
| Ti | -0.065276513 | 16.635561382 | 2.974762067  |
| Ti | 6.439375547  | 16.272270483 | 5.925589778  |
| Ti | 3.182397318  | 16.318272593 | 7.405183386  |
| Ti | 3.172062779  | 16.316335196 | 10.362260083 |
| Ti | -0.057565452 | 16.636416494 | 8.881958474  |
| Ti | 6.443220491  | 16.655010720 | 0.009575470  |
| Ti | 9.689000036  | 16.406496316 | 7.338168466  |
| Ti | 9.701357191  | 16.264985599 | 10.340212666 |
| Ti | 6.433372253  | 16.310742676 | 8.902635077  |
| Ti | -0.061631336 | 16.640002322 | 0.013607234  |
| Ti | 6.423532977  | 19.587214877 | 4.258259354  |
| Ti | 6.429692136  | 19.990801779 | 10.515635816 |
| Ti | 3.195642647  | 19.573089809 | 2.970625375  |
| Ti | 3.206027452  | 19.566575382 | 5.933123577  |
| Ti | 3.199483045  | 19.575794806 | 8.894723913  |
| Ti | 6.417193404  | 19.543924909 | 7.578725984  |
| Ti | 9.664112196  | 19.551837019 | 2.990420672  |
| Ti | 3.183984160  | 19.570747001 | 0.021850572  |
| Ti | -0.050150017 | 20.002505101 | 4.449954591  |
| Ti | -0.076153464 | 20.000509124 | 1.496771134  |

|    |              |              |              |
|----|--------------|--------------|--------------|
| Ti | 9.675138908  | 19.545473327 | 8.883213949  |
| Ti | 9.664761247  | 20.060980276 | 5.936658380  |
| Ti | -0.045127248 | 20.001343520 | 7.413511070  |
| Ti | -0.068942472 | 20.001367451 | 10.366958091 |
| Ti | 9.675514804  | 19.537424056 | 0.020807438  |
| Ti | 6.441356598  | 20.097267182 | 1.524278029  |
| O  | 0.000000000  | 1.266694833  | 2.957400000  |
| O  | 0.000000000  | 1.266694833  | 0.000000000  |
| O  | 0.000000000  | 1.266694833  | 8.872200000  |
| O  | 0.000000000  | 1.266694833  | 5.914800000  |
| O  | 6.494400000  | 1.266694833  | 2.957400000  |
| O  | 6.494400000  | 1.266694833  | 0.000000000  |
| O  | 6.494400000  | 1.266694833  | 8.872200000  |
| O  | 6.494400000  | 1.266694833  | 5.914800000  |
| O  | 9.741600000  | 1.980495667  | 8.872200000  |
| O  | 9.741600000  | 1.980495667  | 5.914800000  |
| O  | 9.741600000  | 1.980495667  | 2.957400000  |
| O  | 9.741600000  | 1.980495667  | 0.000000000  |
| O  | 3.247200000  | 1.980495667  | 8.872200000  |
| O  | 3.247200000  | 1.980495667  | 5.914800000  |
| O  | 3.247200000  | 1.980495667  | 2.957400000  |
| O  | 3.247200000  | 1.980495667  | 0.000000000  |

|   |              |             |              |
|---|--------------|-------------|--------------|
| O | 1.266698949  | 3.247194072 | 1.478700000  |
| O | 1.266698949  | 3.247194072 | 4.436100000  |
| O | 5.227599738  | 3.247194072 | 1.478700000  |
| O | 5.227599738  | 3.247194072 | 4.436100000  |
| O | 1.266698949  | 3.247194072 | 7.393500000  |
| O | 1.266698949  | 3.247194072 | 10.350900000 |
| O | 5.227599738  | 3.247194072 | 7.393500000  |
| O | 5.227599738  | 3.247194072 | 10.350900000 |
| O | 7.761098949  | 3.247194072 | 1.478700000  |
| O | 7.761098949  | 3.247194072 | 4.436100000  |
| O | 11.721999738 | 3.247194072 | 1.478700000  |
| O | 11.721999738 | 3.247194072 | 4.436100000  |
| O | 7.761098949  | 3.247194072 | 7.393500000  |
| O | 7.761098949  | 3.247194072 | 10.350900000 |
| O | 11.721999738 | 3.247194072 | 7.393500000  |
| O | 11.721999738 | 3.247194072 | 10.350900000 |
| O | 9.741600000  | 4.513896049 | 8.872200000  |
| O | 9.741600000  | 4.513896049 | 5.914800000  |
| O | 9.741600000  | 4.513896049 | 2.957400000  |
| O | 9.741600000  | 4.513896049 | 0.000000000  |
| O | 3.247200000  | 4.513896049 | 8.872200000  |
| O | 3.247200000  | 4.513896049 | 5.914800000  |

|   |              |             |              |
|---|--------------|-------------|--------------|
| O | 3.247200000  | 4.513896049 | 2.957400000  |
| O | 3.247200000  | 4.513896049 | 0.000000000  |
| O | 0.000000000  | 5.227596870 | 2.957400000  |
| O | 0.000000000  | 5.227596870 | 0.000000000  |
| O | 0.000000000  | 5.227596870 | 8.872200000  |
| O | 0.000000000  | 5.227596870 | 5.914800000  |
| O | 6.494400000  | 5.227596870 | 0.000000000  |
| O | 6.494400000  | 5.227596870 | 2.957400000  |
| O | 6.494400000  | 5.227596870 | 8.872200000  |
| O | 6.494400000  | 5.227596870 | 5.914800000  |
| O | 8.474899752  | 6.494391717 | 7.393500000  |
| O | 11.008298949 | 6.494391717 | 7.393500000  |
| O | 8.474899752  | 6.494391717 | 10.350900000 |
| O | 11.008298949 | 6.494391717 | 10.350900000 |
| O | 8.474899752  | 6.494391717 | 1.478700000  |
| O | 11.008298949 | 6.494391717 | 1.478700000  |
| O | 8.474899752  | 6.494391717 | 4.436100000  |
| O | 11.008298949 | 6.494391717 | 4.436100000  |
| O | 1.980499752  | 6.494391717 | 1.478700000  |
| O | 4.513898949  | 6.494391717 | 1.478700000  |
| O | 1.980499752  | 6.494391717 | 4.436100000  |
| O | 4.513898949  | 6.494391717 | 4.436100000  |

|   |             |             |              |
|---|-------------|-------------|--------------|
| O | 1.980499752 | 6.494391717 | 7.393500000  |
| O | 4.513898949 | 6.494391717 | 7.393500000  |
| O | 1.980499752 | 6.494391717 | 10.350900000 |
| O | 4.513898949 | 6.494391717 | 10.350900000 |
| O | 0.000000000 | 7.761086550 | 8.872200000  |
| O | 0.000000000 | 7.761086550 | 5.914800000  |
| O | 6.494400000 | 7.761086550 | 2.957400000  |
| O | 6.494400000 | 7.761086550 | 0.000000000  |
| O | 0.000000000 | 7.761086550 | 2.957400000  |
| O | 0.000000000 | 7.761086550 | 0.000000000  |
| O | 6.494400000 | 7.761086550 | 8.872200000  |
| O | 6.494400000 | 7.761086550 | 5.914800000  |
| O | 3.247200000 | 8.474887384 | 2.957400000  |
| O | 3.247200000 | 8.474887384 | 0.000000000  |
| O | 3.247200000 | 8.474887384 | 8.872200000  |
| O | 3.247200000 | 8.474887384 | 5.914800000  |
| O | 9.741600000 | 8.474887384 | 2.957400000  |
| O | 9.741600000 | 8.474887384 | 0.000000000  |
| O | 9.741600000 | 8.474887384 | 8.872200000  |
| O | 9.741600000 | 8.474887384 | 5.914800000  |
| O | 1.269520506 | 9.786871376 | 1.481752510  |
| O | 1.268562322 | 9.785668718 | 4.438511227  |

|   |              |              |              |
|---|--------------|--------------|--------------|
| O | 5.210722871  | 9.773099211  | 1.483482589  |
| O | 5.210372433  | 9.772333039  | 4.441806717  |
| O | 1.269046155  | 9.785225803  | 7.394836272  |
| O | 1.270122277  | 9.786918882  | 10.352933627 |
| O | 5.210824313  | 9.772028713  | 7.398980890  |
| O | 5.211292949  | 9.773569273  | 10.356377696 |
| O | 7.758020733  | 9.782687969  | 1.482557159  |
| O | 7.756946690  | 9.782197905  | 4.442659868  |
| O | 11.700331692 | 9.777477643  | 1.480537847  |
| O | 11.699152309 | 9.777782683  | 4.438686424  |
| O | 7.757675231  | 9.781960731  | 7.396656610  |
| O | 7.758707841  | 9.781915725  | 10.358253634 |
| O | 11.700096595 | 9.777958420  | 7.396313552  |
| O | 11.701183238 | 9.777452997  | 10.353503695 |
| O | 9.723438540  | 11.074600041 | 2.959819863  |
| O | 9.723587652  | 11.066800803 | 0.003155428  |
| O | 3.242118392  | 11.071238171 | 2.960707556  |
| O | 3.243627171  | 11.071391406 | 0.002322624  |
| O | 3.241700023  | 11.071067792 | 8.872708318  |
| O | 3.242037082  | 11.072311169 | 5.916626372  |
| O | 9.723341514  | 11.074330720 | 8.875655781  |
| O | 9.722085757  | 11.075803413 | 5.917834292  |



|   |              |              |              |
|---|--------------|--------------|--------------|
| O | 6.461691994  | 11.793107207 | 8.882520261  |
| O | -0.031346131 | 11.795108184 | 2.960311383  |
| O | 6.459979940  | 11.804183661 | 0.008362108  |
| O | 6.459002403  | 11.793833731 | 5.920576512  |
| O | -0.030289492 | 11.794180205 | 0.002345691  |
| O | -0.029587447 | 11.795383935 | 5.916478384  |
| O | 6.460567943  | 11.796563375 | 2.960414774  |
| O | -0.030363788 | 11.794821361 | 8.872720621  |
| O | 8.432414296  | 13.092621705 | 1.488642779  |
| O | 8.426878340  | 13.091799812 | 4.445182649  |
| O | 10.964919345 | 13.111502398 | 1.485529701  |
| O | 10.965280563 | 13.113387645 | 4.444997515  |
| O | 1.955306805  | 13.094244061 | 1.484230456  |
| O | 1.956159650  | 13.099674060 | 4.441734320  |
| O | 4.486772879  | 13.113099036 | 1.487616088  |
| O | 4.490916177  | 13.110895532 | 4.442286763  |
| O | 1.956317074  | 13.099549758 | 7.396505783  |
| O | 1.955248875  | 13.093296437 | 10.355109327 |
| O | 4.491274538  | 13.110018989 | 7.397150023  |
| O | 4.486588958  | 13.110771230 | 10.352245499 |
| O | 8.426827554  | 13.091779452 | 7.398914999  |
| O | 8.432431572  | 13.091344395 | 10.355757352 |

|   |              |              |              |
|---|--------------|--------------|--------------|
| O | 10.965202500 | 13.113223338 | 7.398425136  |
| O | 10.965067807 | 13.110345817 | 10.358079029 |
| O | -0.032496679 | 14.404947885 | 2.969145846  |
| O | -0.033644629 | 14.405558680 | 5.927227113  |
| O | -0.031400424 | 14.403774517 | 8.885952975  |
| O | -0.034668406 | 14.403804878 | 0.012584447  |
| O | 6.452832982  | 14.411975951 | 2.973967591  |
| O | 6.458508179  | 14.408203670 | 5.921938927  |
| O | 6.452686988  | 14.403390895 | 8.872405835  |
| O | 6.462163227  | 14.403121217 | 0.006657344  |
| O | 9.678464431  | 15.110850897 | 8.878588221  |
| O | 3.200267179  | 15.114467443 | 8.883812054  |
| O | 9.671664014  | 15.109861124 | 5.926608070  |
| O | 9.674641697  | 15.113897368 | 2.982221813  |
| O | 3.202908192  | 15.116315185 | 2.967987492  |
| O | 9.684234315  | 15.103523506 | 0.014517522  |
| O | 3.189089538  | 15.110495850 | 0.010600268  |
| O | 3.203514509  | 15.117208517 | 5.924110487  |
| O | 1.232477618  | 16.467643270 | 10.367416606 |
| O | 5.161411411  | 16.475752906 | 4.449199153  |
| O | 5.159262544  | 16.458824255 | 7.403597628  |
| O | 7.714188209  | 16.453320676 | 1.478674448  |

|   |              |              |              |
|---|--------------|--------------|--------------|
| O | 7.697933376  | 16.487616963 | 4.437482880  |
| O | 5.158078745  | 16.443528319 | 10.383550879 |
| O | 11.648172048 | 16.460493046 | 1.492702461  |
| O | 11.657852601 | 16.461657127 | 4.445315495  |
| O | 1.234758451  | 16.468425873 | 4.449005029  |
| O | 1.231515018  | 16.469888565 | 1.490800734  |
| O | 5.158762605  | 16.448164285 | 1.468514241  |
| O | 7.699435400  | 16.470702600 | 7.416097612  |
| O | 7.714384600  | 16.447924610 | 10.374199107 |
| O | 1.235378146  | 16.466210939 | 7.406648600  |
| O | 11.660563234 | 16.459407546 | 7.415153373  |
| O | 11.650143229 | 16.459797955 | 10.363883223 |
| O | 3.207456740  | 17.747316950 | 8.887501233  |
| O | 3.207242035  | 17.744627311 | 0.012303257  |
| O | 9.670158872  | 17.734758516 | 2.961524508  |
| O | 9.678817986  | 17.692229719 | 5.937160547  |
| O | 3.209073196  | 17.747576984 | 2.968044156  |
| O | 3.198102726  | 17.745407771 | 5.932401262  |
| O | 9.663103616  | 17.728899175 | 8.899063720  |
| O | 9.662555878  | 17.730262926 | 0.012295805  |
| O | 6.442583131  | 18.584564344 | 0.010700110  |
| O | 6.430576024  | 18.642197980 | 5.955463304  |

|   |              |              |              |
|---|--------------|--------------|--------------|
| O | -0.057304118 | 18.506626257 | 0.013971941  |
| O | 6.416567474  | 18.469327433 | 2.851603037  |
| O | -0.045476776 | 18.510796090 | 5.933261510  |
| O | 6.411745511  | 18.446709107 | 8.982023522  |
| O | -0.048463811 | 18.507918569 | 8.886880770  |
| O | -0.057251383 | 18.508898698 | 2.982006041  |
| O | 1.991063933  | 19.957053421 | 4.457520566  |
| O | 4.426060630  | 19.984378793 | 1.490911696  |
| O | 4.466007815  | 19.934257214 | 4.477872210  |
| O | 1.996333879  | 19.965591684 | 7.415750768  |
| O | 1.976893931  | 19.942000730 | 10.363661181 |
| O | 4.481627366  | 19.961010368 | 7.409445473  |
| O | 4.448080024  | 19.975247594 | 10.362058270 |
| O | 8.441164461  | 19.962010143 | 1.499421910  |
| O | 8.388823754  | 19.898271777 | 4.466620013  |
| O | 10.894928027 | 19.909243574 | 1.502691139  |
| O | 10.891451964 | 19.962633081 | 4.429063872  |
| O | 8.370291594  | 19.969456834 | 7.441180267  |
| O | 8.428729634  | 19.987507061 | 10.354755976 |
| O | 10.893259486 | 19.939253227 | 7.444561285  |
| O | 10.892284676 | 19.914692146 | 10.362514538 |
| O | 1.965560943  | 19.919210596 | 1.498290409  |

|   |              |              |              |
|---|--------------|--------------|--------------|
| O | -0.065791389 | 21.109535763 | 0.017291208  |
| O | 6.440026285  | 21.054291369 | 3.086088067  |
| O | -0.047508484 | 21.112012874 | 2.973743539  |
| O | -0.058408426 | 21.106067450 | 5.934157721  |
| O | -0.057006674 | 21.112632598 | 8.890775311  |
| O | 6.423680011  | 21.158142143 | 8.814279084  |
| O | 6.443409348  | 21.218886544 | 0.023605967  |
| H | 0.000000000  | 0.932897449  | 9.814799089  |
| H | 0.816399334  | 0.932897449  | 8.400899272  |
| H | 6.457698847  | 0.932897449  | 6.856699960  |
| H | 0.834099172  | 0.932897449  | -0.439201108 |
| H | 0.000000000  | 0.932897449  | 3.899999089  |
| H | 0.816399334  | 0.932897449  | 2.486099272  |
| H | 6.457698847  | 0.932897449  | 0.941899960  |
| H | 0.834099172  | 0.932897449  | 5.475598892  |
| H | 6.494400000  | 0.932897449  | 9.814799089  |
| H | 7.310799334  | 0.932897449  | 8.400899272  |
| H | -0.036701153 | 0.932897449  | 6.856699960  |
| H | 7.328499172  | 0.932897449  | -0.439201108 |
| H | 6.494400000  | 0.932897449  | 3.899999089  |
| H | 7.310799334  | 0.932897449  | 2.486099272  |
| H | -0.036701153 | 0.932897449  | 0.941899960  |

|   |             |              |             |
|---|-------------|--------------|-------------|
| H | 7.328499172 | 0.932897449  | 5.475598892 |
| H | 9.602356037 | 21.758188760 | 5.951918209 |
| H | 7.230097062 | 21.707497106 | 8.763445282 |

TS7-B3:

|    |             |             |              |
|----|-------------|-------------|--------------|
| Ti | 3.247200000 | 3.247190143 | 1.478700000  |
| Ti | 3.247200000 | 3.247190143 | 4.436100000  |
| Ti | 0.000000000 | 3.247190143 | 2.957400000  |
| Ti | 0.000000000 | 3.247190143 | 0.000000000  |
| Ti | 3.247200000 | 3.247190143 | 7.393500000  |
| Ti | 3.247200000 | 3.247190143 | 10.350900000 |
| Ti | 0.000000000 | 3.247190143 | 8.872200000  |
| Ti | 0.000000000 | 3.247190143 | 5.914800000  |
| Ti | 9.741600000 | 3.247190143 | 1.478700000  |
| Ti | 9.741600000 | 3.247190143 | 4.436100000  |
| Ti | 6.494400000 | 3.247190143 | 2.957400000  |
| Ti | 6.494400000 | 3.247190143 | 0.000000000  |
| Ti | 9.741600000 | 3.247190143 | 7.393500000  |
| Ti | 9.741600000 | 3.247190143 | 10.350900000 |
| Ti | 6.494400000 | 3.247190143 | 8.872200000  |
| Ti | 6.494400000 | 3.247190143 | 5.914800000  |
| Ti | 0.000000000 | 6.494389931 | 4.436100000  |
| Ti | 0.000000000 | 6.494389931 | 1.478700000  |

|    |              |             |              |
|----|--------------|-------------|--------------|
| Ti | 3.247200000  | 6.494389931 | 2.957400000  |
| Ti | 3.247200000  | 6.494389931 | 0.000000000  |
| Ti | 0.000000000  | 6.494389931 | 10.350900000 |
| Ti | 0.000000000  | 6.494389931 | 7.393500000  |
| Ti | 3.247200000  | 6.494389931 | 8.872200000  |
| Ti | 3.247200000  | 6.494389931 | 5.914800000  |
| Ti | 6.494400000  | 6.494389931 | 4.436100000  |
| Ti | 6.494400000  | 6.494389931 | 1.478700000  |
| Ti | 9.741600000  | 6.494389931 | 2.957400000  |
| Ti | 9.741600000  | 6.494389931 | 0.000000000  |
| Ti | 6.494400000  | 6.494389931 | 10.350900000 |
| Ti | 6.494400000  | 6.494389931 | 7.393500000  |
| Ti | 9.741600000  | 6.494389931 | 8.872200000  |
| Ti | 9.741600000  | 6.494389931 | 5.914800000  |
| Ti | 3.226226075  | 9.738101046 | 1.478585963  |
| Ti | 3.226121516  | 9.737942453 | 4.436065103  |
| Ti | -0.014061415 | 9.837998086 | 2.961514217  |
| Ti | -0.011576008 | 9.838443859 | 0.002350896  |
| Ti | 3.226471434  | 9.738095688 | 7.393638761  |
| Ti | 3.226371290  | 9.738220347 | 10.351233358 |
| Ti | -0.012120369 | 9.839614370 | 8.873007370  |
| Ti | -0.015315094 | 9.839012148 | 5.917259847  |

|    |              |              |              |
|----|--------------|--------------|--------------|
| Ti | 9.740709748  | 9.734112308  | 1.487275869  |
| Ti | 9.734327181  | 9.748623498  | 4.440283656  |
| Ti | 6.481299626  | 9.758236903  | 2.963684238  |
| Ti | 6.482638382  | 9.763063608  | 0.010225861  |
| Ti | 9.735771796  | 9.749555764  | 7.391317675  |
| Ti | 9.742543636  | 9.732527814  | 10.345781214 |
| Ti | 6.483839196  | 9.757228914  | 8.888613688  |
| Ti | 6.478215306  | 9.732647116  | 5.927144661  |
| Ti | -0.034438634 | 13.176440564 | 1.511741374  |
| Ti | -0.032983499 | 13.178432969 | 4.468081324  |
| Ti | 3.211138285  | 12.994000546 | 2.957371964  |
| Ti | 3.210914878  | 12.995871863 | 5.914908714  |
| Ti | 6.460249457  | 13.128868249 | 1.432602770  |
| Ti | 6.458024736  | 13.006288588 | 4.413165481  |
| Ti | 9.706984978  | 13.013210925 | 2.962241027  |
| Ti | 9.708917971  | 13.016785680 | 5.916439819  |
| Ti | -0.033481749 | 13.179784575 | 7.424141740  |
| Ti | -0.035446565 | 13.177184590 | 10.382034561 |
| Ti | 3.211392216  | 12.993359034 | 8.872996487  |
| Ti | 3.210408185  | 12.995645762 | -0.000130126 |
| Ti | 6.458979283  | 13.007894513 | 7.428072479  |
| Ti | 6.461393641  | 13.136063122 | 10.397975183 |



|    |              |              |              |
|----|--------------|--------------|--------------|
| Ti | 9.706940167  | 13.011168871 | 8.872442743  |
| Ti | 9.711038393  | 12.979251825 | 0.003220727  |
| Ti | 9.703744013  | 16.286547000 | 1.500645446  |
| Ti | 9.685655030  | 16.374557838 | 4.484332000  |
| Ti | 6.434001560  | 16.319641701 | 2.941155002  |
| Ti | -0.052529305 | 16.656432693 | 5.918056925  |
| Ti | 3.173301521  | 16.313478749 | 1.481826682  |
| Ti | 3.186972493  | 16.319697065 | 4.440764411  |
| Ti | -0.058133842 | 16.648773830 | 2.966761709  |
| Ti | 6.446667978  | 16.261585509 | 5.919868156  |
| Ti | 3.186117051  | 16.319328088 | 7.398085035  |
| Ti | 3.177953460  | 16.313759500 | 10.355152978 |
| Ti | -0.052667376 | 16.648715966 | 8.874922701  |
| Ti | 6.443726795  | 16.647152189 | 0.004140715  |
| Ti | 9.696328317  | 16.366834681 | 7.371119698  |
| Ti | 9.702514493  | 16.283730559 | 10.343780355 |
| Ti | 6.434501240  | 16.330556705 | 8.893462996  |
| Ti | -0.053800129 | 16.643447774 | 0.004713622  |
| Ti | 6.447144018  | 19.590630682 | 4.253756416  |
| Ti | 6.413918668  | 19.986874835 | 10.518828743 |
| Ti | 3.206449458  | 19.567723033 | 2.964599495  |
| Ti | 3.216283928  | 19.566875779 | 5.930247092  |

|    |              |              |              |
|----|--------------|--------------|--------------|
| Ti | 3.185373832  | 19.573826334 | 8.879836953  |
| Ti | 6.410877989  | 19.556240811 | 7.592838815  |
| Ti | 9.652884807  | 19.562815960 | 2.915822505  |
| Ti | 3.176038911  | 19.564477607 | 0.011345769  |
| Ti | -0.013786962 | 20.027104401 | 4.433526471  |
| Ti | -0.078174911 | 20.003320922 | 1.487405639  |
| Ti | 9.684792444  | 19.552643553 | 8.897782811  |
| Ti | 9.805505675  | 19.667336465 | 5.803645648  |
| Ti | -0.089886652 | 20.023798610 | 7.409126902  |
| Ti | -0.064178830 | 20.011196599 | 10.363028416 |
| Ti | 9.668776085  | 19.544916111 | -0.018585485 |
| Ti | 6.422314498  | 20.095844852 | 1.518978368  |
| O  | 0.000000000  | 1.266689833  | 2.957400000  |
| O  | 0.000000000  | 1.266689833  | 0.000000000  |
| O  | 0.000000000  | 1.266689833  | 8.872200000  |
| O  | 0.000000000  | 1.266689833  | 5.914800000  |
| O  | 6.494400000  | 1.266689833  | 2.957400000  |
| O  | 6.494400000  | 1.266689833  | 0.000000000  |
| O  | 6.494400000  | 1.266689833  | 8.872200000  |
| O  | 6.494400000  | 1.266689833  | 5.914800000  |
| O  | 9.741600000  | 1.980499953  | 8.872200000  |
| O  | 9.741600000  | 1.980499953  | 5.914800000  |

|   |              |             |              |
|---|--------------|-------------|--------------|
| O | 9.741600000  | 1.980499953 | 2.957400000  |
| O | 9.741600000  | 1.980499953 | 0.000000000  |
| O | 3.247200000  | 1.980499953 | 8.872200000  |
| O | 3.247200000  | 1.980499953 | 5.914800000  |
| O | 3.247200000  | 1.980499953 | 2.957400000  |
| O | 3.247200000  | 1.980499953 | 0.000000000  |
| O | 1.266699988  | 3.247190143 | 1.478700000  |
| O | 1.266699988  | 3.247190143 | 4.436100000  |
| O | 5.227599998  | 3.247190143 | 1.478700000  |
| O | 5.227599998  | 3.247190143 | 4.436100000  |
| O | 1.266699988  | 3.247190143 | 7.393500000  |
| O | 1.266699988  | 3.247190143 | 10.350900000 |
| O | 5.227599998  | 3.247190143 | 7.393500000  |
| O | 5.227599998  | 3.247190143 | 10.350900000 |
| O | 7.761099988  | 3.247190143 | 1.478700000  |
| O | 7.761099988  | 3.247190143 | 4.436100000  |
| O | 11.721999998 | 3.247190143 | 1.478700000  |
| O | 11.721999998 | 3.247190143 | 4.436100000  |
| O | 7.761099988  | 3.247190143 | 7.393500000  |
| O | 7.761099988  | 3.247190143 | 10.350900000 |
| O | 11.721999998 | 3.247190143 | 7.393500000  |
| O | 11.721999998 | 3.247190143 | 10.350900000 |

|   |              |             |              |
|---|--------------|-------------|--------------|
| O | 9.741600000  | 4.513899978 | 8.872200000  |
| O | 9.741600000  | 4.513899978 | 5.914800000  |
| O | 9.741600000  | 4.513899978 | 2.957400000  |
| O | 9.741600000  | 4.513899978 | 0.000000000  |
| O | 3.247200000  | 4.513899978 | 8.872200000  |
| O | 3.247200000  | 4.513899978 | 5.914800000  |
| O | 3.247200000  | 4.513899978 | 2.957400000  |
| O | 3.247200000  | 4.513899978 | 0.000000000  |
| O | 0.000000000  | 5.227600085 | 2.957400000  |
| O | 0.000000000  | 5.227600085 | 0.000000000  |
| O | 0.000000000  | 5.227600085 | 8.872200000  |
| O | 0.000000000  | 5.227600085 | 5.914800000  |
| O | 6.494400000  | 5.227600085 | 0.000000000  |
| O | 6.494400000  | 5.227600085 | 2.957400000  |
| O | 6.494400000  | 5.227600085 | 8.872200000  |
| O | 6.494400000  | 5.227600085 | 5.914800000  |
| O | 8.474900012  | 6.494389931 | 7.393500000  |
| O | 11.008299988 | 6.494389931 | 7.393500000  |
| O | 8.474900012  | 6.494389931 | 10.350900000 |
| O | 11.008299988 | 6.494389931 | 10.350900000 |
| O | 8.474900012  | 6.494389931 | 1.478700000  |
| O | 11.008299988 | 6.494389931 | 1.478700000  |

|   |              |             |              |
|---|--------------|-------------|--------------|
| O | 8.474900012  | 6.494389931 | 4.436100000  |
| O | 11.008299988 | 6.494389931 | 4.436100000  |
| O | 1.980500012  | 6.494389931 | 1.478700000  |
| O | 4.513899988  | 6.494389931 | 1.478700000  |
| O | 1.980500012  | 6.494389931 | 4.436100000  |
| O | 4.513899988  | 6.494389931 | 4.436100000  |
| O | 1.980500012  | 6.494389931 | 7.393500000  |
| O | 4.513899988  | 6.494389931 | 7.393500000  |
| O | 1.980500012  | 6.494389931 | 10.350900000 |
| O | 4.513899988  | 6.494389931 | 10.350900000 |
| O | 0.000000000  | 7.761090122 | 8.872200000  |
| O | 0.000000000  | 7.761090122 | 5.914800000  |
| O | 6.494400000  | 7.761090122 | 2.957400000  |
| O | 6.494400000  | 7.761090122 | 0.000000000  |
| O | 0.000000000  | 7.761090122 | 2.957400000  |
| O | 0.000000000  | 7.761090122 | 0.000000000  |
| O | 6.494400000  | 7.761090122 | 8.872200000  |
| O | 6.494400000  | 7.761090122 | 5.914800000  |
| O | 3.247200000  | 8.474889884 | 2.957400000  |
| O | 3.247200000  | 8.474889884 | 0.000000000  |
| O | 3.247200000  | 8.474889884 | 8.872200000  |
| O | 3.247200000  | 8.474889884 | 5.914800000  |

|   |              |              |              |
|---|--------------|--------------|--------------|
| O | 9.741600000  | 8.474889884  | 2.957400000  |
| O | 9.741600000  | 8.474889884  | 0.000000000  |
| O | 9.741600000  | 8.474889884  | 8.872200000  |
| O | 9.741600000  | 8.474889884  | 5.914800000  |
| O | 1.269312685  | 9.786223434  | 1.479735681  |
| O | 1.268588430  | 9.785213301  | 4.436945343  |
| O | 5.211227486  | 9.773909674  | 1.482481805  |
| O | 5.210814572  | 9.772952763  | 4.440710232  |
| O | 1.268920683  | 9.785205443  | 7.393932254  |
| O | 1.269823795  | 9.786446677  | 10.351586117 |
| O | 5.210977581  | 9.772530208  | 7.398416737  |
| O | 5.211550777  | 9.773970397  | 10.355600137 |
| O | 7.758496643  | 9.782403289  | 1.481731453  |
| O | 7.757115934  | 9.781747132  | 4.441849540  |
| O | 11.700482102 | 9.777359770  | 1.478926655  |
| O | 11.699785253 | 9.777935560  | 4.436808711  |
| O | 7.757715107  | 9.781452807  | 7.396187567  |
| O | 7.758944627  | 9.782095392  | 10.356786646 |
| O | 11.700163357 | 9.777989853  | 7.395014425  |
| O | 11.700923332 | 9.777640521  | 10.351976020 |
| O | 9.722934575  | 11.074896509 | 2.958422196  |
| O | 9.723574533  | 11.068730699 | 0.002000267  |

|   |              |              |              |
|---|--------------|--------------|--------------|
| O | 3.241933431  | 11.070774539 | 2.959414463  |
| O | 3.243615351  | 11.071303180 | 0.001499047  |
| O | 3.241857447  | 11.070483072 | 8.872085253  |
| O | 3.241995778  | 11.071345328 | 5.915717385  |
| O | 9.722933016  | 11.073779576 | 8.874444903  |
| O | 9.722703244  | 11.076265260 | 5.916176729  |
| O | 6.463550431  | 11.793787654 | 8.881100946  |
| O | -0.030365347 | 11.795024959 | 2.956067277  |
| O | 6.462000218  | 11.806049977 | 0.004110313  |
| O | 6.461312071  | 11.792748946 | 5.918304282  |
| O | -0.030910097 | 11.794687057 | -0.001756814 |
| O | -0.029722531 | 11.795207840 | 5.912960497  |
| O | 6.462775000  | 11.795429655 | 2.955431318  |
| O | -0.029936976 | 11.795216770 | 8.869908488  |
| O | 8.434096866  | 13.096550792 | 1.486206236  |
| O | 8.428554025  | 13.093600048 | 4.440846864  |
| O | 10.965641652 | 13.113534807 | 1.482973088  |
| O | 10.965607361 | 13.114912845 | 4.440613702  |
| O | 1.956255118  | 13.093665414 | 1.482197066  |
| O | 1.956790776  | 13.098019914 | 4.439127550  |
| O | 4.487932779  | 13.113470156 | 1.485658171  |
| O | 4.492218304  | 13.108201250 | 4.439816387  |

|   |              |              |              |
|---|--------------|--------------|--------------|
| O | 1.956974697  | 13.098046703 | 7.394237930  |
| O | 1.956197967  | 13.093014971 | 10.352388282 |
| O | 4.491882284  | 13.107740475 | 7.393773974  |
| O | 4.487291262  | 13.110617639 | 10.350298583 |
| O | 8.428580912  | 13.093489676 | 7.394143649  |
| O | 8.433772925  | 13.094783060 | 10.352197944 |
| O | 10.965547873 | 13.113400504 | 7.394601809  |
| O | 10.965226919 | 13.112984735 | 10.353965759 |
| O | -0.031486280 | 14.405996594 | 2.966216246  |
| O | -0.031784892 | 14.406600959 | 5.922940303  |
| O | -0.031036867 | 14.405908726 | 8.880827682  |
| O | -0.031013877 | 14.405075045 | 0.008683518  |
| O | 6.455713768  | 14.411631620 | 2.971483139  |
| O | 6.460169446  | 14.405305789 | 5.915938362  |
| O | 6.452441240  | 14.406638107 | 8.867146631  |
| O | 6.463886062  | 14.405831215 | 0.004909875  |
| O | 9.680767345  | 15.112348236 | 8.867772536  |
| O | 3.201836486  | 15.113598043 | 8.874667418  |
| O | 9.679458723  | 15.117802881 | 5.918570212  |
| O | 9.676026952  | 15.122060225 | 2.977300818  |
| O | 3.204018085  | 15.114736407 | 2.965866090  |
| O | 9.688297602  | 15.106238148 | 0.010146011  |



|   |              |              |              |
|---|--------------|--------------|--------------|
| O | 3.186741942  | 15.109837907 | 0.005255773  |
| O | 3.203757660  | 15.115168606 | 5.917672227  |
| O | 1.234627264  | 16.474409873 | 10.354490047 |
| O | 5.166797477  | 16.479570907 | 4.446518920  |
| O | 5.162801473  | 16.464717886 | 7.390580691  |
| O | 7.716781164  | 16.454675497 | 1.473682712  |
| O | 7.704492720  | 16.487611963 | 4.434952056  |
| O | 5.158139922  | 16.433179104 | 10.380037961 |
| O | 11.652280406 | 16.464660736 | 1.484479233  |
| O | 11.653765026 | 16.470936917 | 4.444173702  |
| O | 1.236600912  | 16.479284798 | 4.443712466  |
| O | 1.234474775  | 16.472309240 | 1.486437741  |
| O | 5.160820810  | 16.442819655 | 1.466354748  |
| O | 7.703734044  | 16.462067181 | 7.408024028  |
| O | 7.716553730  | 16.447922467 | 10.368589866 |
| O | 1.236168385  | 16.478498981 | 7.396813353  |
| O | 11.659078354 | 16.465134369 | 7.398736136  |
| O | 11.653741256 | 16.462761558 | 10.355447180 |
| O | 3.211155171  | 17.746252167 | 8.877764762  |
| O | 3.212698760  | 17.740489268 | 0.005502065  |
| O | 9.670107177  | 17.738977284 | 2.950736978  |
| O | 9.661631985  | 17.743629680 | 5.940302370  |

|   |              |              |              |
|---|--------------|--------------|--------------|
| O | 3.216282759  | 17.743129257 | 2.961589216  |
| O | 3.201411882  | 17.744785546 | 5.924338206  |
| O | 9.666796462  | 17.722652284 | 8.879968853  |
| O | 9.661291938  | 17.724104975 | -0.002699278 |
| O | 6.428679530  | 18.579925878 | 0.012598879  |
| O | 6.477046703  | 18.675844539 | 5.963136574  |
| O | -0.048992974 | 18.508088235 | 0.006045517  |
| O | 6.424389719  | 18.468670204 | 2.848338067  |
| O | -0.080888401 | 18.529273515 | 5.920211569  |
| O | 6.400347969  | 18.438335508 | 8.992593270  |
| O | -0.061226086 | 18.519258629 | 8.874421126  |
| O | -0.049473430 | 18.514975567 | 2.970716817  |
| O | 2.003637741  | 19.961590445 | 4.449005975  |
| O | 4.423147892  | 19.987770667 | 1.484148714  |
| O | 4.479702036  | 19.922564608 | 4.471472160  |
| O | 1.989624514  | 19.955605373 | 7.403075588  |
| O | 1.975491530  | 19.932801666 | 10.355874702 |
| O | 4.479654368  | 19.955418920 | 7.405721633  |
| O | 4.435893282  | 19.976220936 | 10.355975963 |
| O | 8.433663170  | 19.973459503 | 1.473491664  |
| O | 8.427450497  | 19.890337878 | 4.442289247  |
| O | 10.903284241 | 19.922480311 | 1.471257289  |

|   |              |              |              |
|---|--------------|--------------|--------------|
| O | 10.933455405 | 20.000800948 | 4.327363027  |
| O | 8.349999321  | 20.065469794 | 7.547849545  |
| O | 8.412196710  | 20.004053875 | 10.370733981 |
| O | 10.873692638 | 20.024249026 | 7.425958056  |
| O | 10.909067245 | 19.933020980 | 10.382712752 |
| O | 1.971149764  | 19.906914697 | 1.493814443  |
| O | -0.044099184 | 21.117864356 | 0.011433545  |
| O | 6.446220125  | 21.055195773 | 3.082494353  |
| O | -0.017606448 | 21.128835082 | 2.952076798  |
| O | -0.056370483 | 21.124398428 | 5.920922055  |
| O | -0.040700535 | 21.127927820 | 8.890641518  |
| O | 6.383257046  | 21.173914213 | 8.831327194  |
| O | 6.425667557  | 21.219544488 | 0.025472914  |
| H | 0.000000000  | 0.932899949  | 9.814800036  |
| H | 0.816399984  | 0.932899949  | 8.400899982  |
| H | 6.457700016  | 0.932899949  | 6.856699960  |
| H | 0.834099951  | 0.932899949  | -0.439200043 |
| H | 0.000000000  | 0.932899949  | 3.900000036  |
| H | 0.816399984  | 0.932899949  | 2.486099982  |
| H | 6.457700016  | 0.932899949  | 0.941899960  |
| H | 0.834099951  | 0.932899949  | 5.475599957  |
| H | 6.494400000  | 0.932899949  | 9.814800036  |

|   |              |              |              |
|---|--------------|--------------|--------------|
| H | 7.310799984  | 0.932899949  | 8.400899982  |
| H | -0.036699984 | 0.932899949  | 6.856699960  |
| H | 7.328499951  | 0.932899949  | -0.439200043 |
| H | 6.494400000  | 0.932899949  | 3.900000036  |
| H | 7.310799984  | 0.932899949  | 2.486099982  |
| H | -0.036699984 | 0.932899949  | 0.941899960  |
| H | 7.328499951  | 0.932899949  | 5.475599957  |
| H | 8.883700411  | 20.935694731 | 6.693647260  |
| H | 7.204273769  | 21.698296613 | 8.786812054  |

7-Bd:

|    |             |             |              |
|----|-------------|-------------|--------------|
| Ti | 3.247200000 | 3.247194072 | 1.478700000  |
| Ti | 3.247200000 | 3.247194072 | 4.436100000  |
| Ti | 0.000000000 | 3.247194072 | 2.957400000  |
| Ti | 0.000000000 | 3.247194072 | 0.000000000  |
| Ti | 3.247200000 | 3.247194072 | 7.393500000  |
| Ti | 3.247200000 | 3.247194072 | 10.350900000 |
| Ti | 0.000000000 | 3.247194072 | 8.872200000  |
| Ti | 0.000000000 | 3.247194072 | 5.914800000  |
| Ti | 9.741600000 | 3.247194072 | 1.478700000  |
| Ti | 9.741600000 | 3.247194072 | 4.436100000  |
| Ti | 6.494400000 | 3.247194072 | 2.957400000  |
| Ti | 6.494400000 | 3.247194072 | 0.000000000  |

|    |             |             |              |
|----|-------------|-------------|--------------|
| Ti | 9.741600000 | 3.247194072 | 7.393500000  |
| Ti | 9.741600000 | 3.247194072 | 10.350900000 |
| Ti | 6.494400000 | 3.247194072 | 8.872200000  |
| Ti | 6.494400000 | 3.247194072 | 5.914800000  |
| Ti | 0.000000000 | 6.494391717 | 4.436100000  |
| Ti | 0.000000000 | 6.494391717 | 1.478700000  |
| Ti | 3.247200000 | 6.494391717 | 2.957400000  |
| Ti | 3.247200000 | 6.494391717 | 0.000000000  |
| Ti | 0.000000000 | 6.494391717 | 10.350900000 |
| Ti | 0.000000000 | 6.494391717 | 7.393500000  |
| Ti | 3.247200000 | 6.494391717 | 8.872200000  |
| Ti | 3.247200000 | 6.494391717 | 5.914800000  |
| Ti | 6.494400000 | 6.494391717 | 4.436100000  |
| Ti | 6.494400000 | 6.494391717 | 1.478700000  |
| Ti | 9.741600000 | 6.494391717 | 2.957400000  |
| Ti | 9.741600000 | 6.494391717 | 0.000000000  |
| Ti | 6.494400000 | 6.494391717 | 10.350900000 |
| Ti | 6.494400000 | 6.494391717 | 7.393500000  |
| Ti | 9.741600000 | 6.494391717 | 8.872200000  |
| Ti | 9.741600000 | 6.494391717 | 5.914800000  |
| Ti | 3.226141778 | 9.737266650 | 1.478978587  |
| Ti | 3.226393761 | 9.738415373 | 4.436585960  |

|    |              |              |              |
|----|--------------|--------------|--------------|
| Ti | -0.014281056 | 9.837143331  | 2.961297853  |
| Ti | -0.011002942 | 9.836986525  | 0.002174044  |
| Ti | 3.226238415  | 9.738187843  | 7.393140380  |
| Ti | 3.226225036  | 9.737909949  | 10.350804535 |
| Ti | -0.013010102 | 9.837134402  | 8.872031192  |
| Ti | -0.016925056 | 9.836103909  | 5.916392737  |
| Ti | 9.740753910  | 9.734243397  | 1.481666036  |
| Ti | 9.731905549  | 9.739057600  | 4.439341665  |
| Ti | 6.479798251  | 9.754653575  | 2.960562289  |
| Ti | 6.483454598  | 9.758618382  | 0.009382884  |
| Ti | 9.733308470  | 9.740052373  | 7.393796213  |
| Ti | 9.742065519  | 9.736089710  | 10.350620230 |
| Ti | 6.481682276  | 9.749768649  | 8.886586568  |
| Ti | 6.477085020  | 9.734615231  | 5.924359500  |
| Ti | -0.036097694 | 13.177531065 | 1.513797477  |
| Ti | -0.035596975 | 13.175920496 | 4.471116326  |
| Ti | 3.210387273  | 12.992636796 | 2.958278348  |
| Ti | 3.211061651  | 12.995927228 | 5.915016008  |
| Ti | 6.457317625  | 13.134967621 | 1.441997601  |
| Ti | 6.457810161  | 13.010692380 | 4.407612430  |
| Ti | 9.706645191  | 12.990777981 | 2.958739347  |
| Ti | 9.705905479  | 12.997575658 | 5.915351733  |

|    |              |              |              |
|----|--------------|--------------|--------------|
| Ti | -0.035614250 | 13.176497000 | 7.427946967  |
| Ti | -0.035588403 | 13.175731543 | 10.385472834 |
| Ti | 3.210961248  | 12.992436770 | 8.871943061  |
| Ti | 3.208567412  | 12.993345818 | 0.001190649  |
| Ti | 6.458836276  | 13.002367002 | 7.424291266  |
| Ti | 6.458396215  | 13.118768352 | 10.399141937 |
| Ti | 9.706215002  | 12.993602280 | 8.873168253  |
| Ti | 9.707999533  | 12.987914033 | 0.001500230  |
| Ti | 9.699610717  | 16.310615159 | 1.482155663  |
| Ti | 9.690042387  | 16.313137990 | 4.436745541  |
| Ti | 6.435012089  | 16.337066488 | 2.951724040  |
| Ti | -0.054946780 | 16.634291572 | 5.919508772  |
| Ti | 3.171205129  | 16.309751117 | 1.485777413  |
| Ti | 3.188600379  | 16.320109620 | 4.440455540  |
| Ti | -0.056137204 | 16.638031349 | 2.966458280  |
| Ti | 6.447176100  | 16.254403138 | 5.924660918  |
| Ti | 3.178973600  | 16.313012259 | 7.398182274  |
| Ti | 3.176258422  | 16.310192246 | 10.358328989 |
| Ti | -0.058734185 | 16.633683635 | 8.875658029  |
| Ti | 6.441844328  | 16.570366039 | 0.011251606  |
| Ti | 9.693385445  | 16.317988984 | 7.394939189  |
| Ti | 9.694160616  | 16.306149930 | 10.355160194 |

|    |              |              |              |
|----|--------------|--------------|--------------|
| Ti | 6.433356017  | 16.314858573 | 8.888640305  |
| Ti | -0.053904169 | 16.638976830 | 0.004075179  |
| Ti | 6.448788920  | 19.613080772 | 4.254753297  |
| Ti | 6.425144498  | 19.918655523 | 10.529812763 |
| Ti | 3.212122966  | 19.565620614 | 2.962852499  |
| Ti | 3.184320570  | 19.562628435 | 5.913674295  |
| Ti | 3.177659783  | 19.565613470 | 8.897319328  |
| Ti | 6.318030021  | 19.645115691 | 7.579290966  |
| Ti | 9.657598963  | 19.560867133 | 2.928823117  |
| Ti | 3.189415946  | 19.558335015 | 0.022200137  |
| Ti | -0.016935966 | 20.011061581 | 4.432442288  |
| Ti | -0.069378636 | 20.000256591 | 1.482215639  |
| Ti | 9.780457034  | 19.568813533 | 8.961953541  |
| Ti | 9.770066904  | 19.560667821 | 5.824691453  |
| Ti | -0.044868511 | 20.003603459 | 7.396128655  |
| Ti | -0.020326563 | 20.007164998 | 10.361529487 |
| Ti | 9.640890430  | 19.558512181 | 0.022017015  |
| Ti | 6.421305528  | 20.096155964 | 1.515293921  |
| O  | 0.000000000  | 1.266694833  | 2.957400000  |
| O  | 0.000000000  | 1.266694833  | 0.000000000  |
| O  | 0.000000000  | 1.266694833  | 8.872200000  |
| O  | 0.000000000  | 1.266694833  | 5.914800000  |



|   |             |             |              |
|---|-------------|-------------|--------------|
| O | 6.494400000 | 1.266694833 | 2.957400000  |
| O | 6.494400000 | 1.266694833 | 0.000000000  |
| O | 6.494400000 | 1.266694833 | 8.872200000  |
| O | 6.494400000 | 1.266694833 | 5.914800000  |
| O | 9.741600000 | 1.980495667 | 8.872200000  |
| O | 9.741600000 | 1.980495667 | 5.914800000  |
| O | 9.741600000 | 1.980495667 | 2.957400000  |
| O | 9.741600000 | 1.980495667 | 0.000000000  |
| O | 3.247200000 | 1.980495667 | 8.872200000  |
| O | 3.247200000 | 1.980495667 | 5.914800000  |
| O | 3.247200000 | 1.980495667 | 2.957400000  |
| O | 3.247200000 | 1.980495667 | 0.000000000  |
| O | 1.266698949 | 3.247194072 | 1.478700000  |
| O | 1.266698949 | 3.247194072 | 4.436100000  |
| O | 5.227599738 | 3.247194072 | 1.478700000  |
| O | 5.227599738 | 3.247194072 | 4.436100000  |
| O | 1.266698949 | 3.247194072 | 7.393500000  |
| O | 1.266698949 | 3.247194072 | 10.350900000 |
| O | 5.227599738 | 3.247194072 | 7.393500000  |
| O | 5.227599738 | 3.247194072 | 10.350900000 |
| O | 7.761098949 | 3.247194072 | 1.478700000  |
| O | 7.761098949 | 3.247194072 | 4.436100000  |

|   |              |             |              |
|---|--------------|-------------|--------------|
| O | 11.721999738 | 3.247194072 | 1.478700000  |
| O | 11.721999738 | 3.247194072 | 4.436100000  |
| O | 7.761098949  | 3.247194072 | 7.393500000  |
| O | 7.761098949  | 3.247194072 | 10.350900000 |
| O | 11.721999738 | 3.247194072 | 7.393500000  |
| O | 11.721999738 | 3.247194072 | 10.350900000 |
| O | 9.741600000  | 4.513896049 | 8.872200000  |
| O | 9.741600000  | 4.513896049 | 5.914800000  |
| O | 9.741600000  | 4.513896049 | 2.957400000  |
| O | 9.741600000  | 4.513896049 | 0.000000000  |
| O | 3.247200000  | 4.513896049 | 8.872200000  |
| O | 3.247200000  | 4.513896049 | 5.914800000  |
| O | 3.247200000  | 4.513896049 | 2.957400000  |
| O | 3.247200000  | 4.513896049 | 0.000000000  |
| O | 0.000000000  | 5.227596870 | 2.957400000  |
| O | 0.000000000  | 5.227596870 | 0.000000000  |
| O | 0.000000000  | 5.227596870 | 8.872200000  |
| O | 0.000000000  | 5.227596870 | 5.914800000  |
| O | 6.494400000  | 5.227596870 | 0.000000000  |
| O | 6.494400000  | 5.227596870 | 2.957400000  |
| O | 6.494400000  | 5.227596870 | 8.872200000  |
| O | 6.494400000  | 5.227596870 | 5.914800000  |

|   |              |             |              |
|---|--------------|-------------|--------------|
| O | 8.474899752  | 6.494391717 | 7.393500000  |
| O | 11.008298949 | 6.494391717 | 7.393500000  |
| O | 8.474899752  | 6.494391717 | 10.350900000 |
| O | 11.008298949 | 6.494391717 | 10.350900000 |
| O | 8.474899752  | 6.494391717 | 1.478700000  |
| O | 11.008298949 | 6.494391717 | 1.478700000  |
| O | 8.474899752  | 6.494391717 | 4.436100000  |
| O | 11.008298949 | 6.494391717 | 4.436100000  |
| O | 1.980499752  | 6.494391717 | 1.478700000  |
| O | 4.513898949  | 6.494391717 | 1.478700000  |
| O | 1.980499752  | 6.494391717 | 4.436100000  |
| O | 4.513898949  | 6.494391717 | 4.436100000  |
| O | 1.980499752  | 6.494391717 | 7.393500000  |
| O | 4.513898949  | 6.494391717 | 7.393500000  |
| O | 1.980499752  | 6.494391717 | 10.350900000 |
| O | 4.513898949  | 6.494391717 | 10.350900000 |
| O | 0.000000000  | 7.761086550 | 8.872200000  |
| O | 0.000000000  | 7.761086550 | 5.914800000  |
| O | 6.494400000  | 7.761086550 | 2.957400000  |
| O | 6.494400000  | 7.761086550 | 0.000000000  |
| O | 0.000000000  | 7.761086550 | 2.957400000  |
| O | 0.000000000  | 7.761086550 | 0.000000000  |

|   |              |             |              |
|---|--------------|-------------|--------------|
| O | 6.494400000  | 7.761086550 | 8.872200000  |
| O | 6.494400000  | 7.761086550 | 5.914800000  |
| O | 3.247200000  | 8.474887384 | 2.957400000  |
| O | 3.247200000  | 8.474887384 | 0.000000000  |
| O | 3.247200000  | 8.474887384 | 8.872200000  |
| O | 3.247200000  | 8.474887384 | 5.914800000  |
| O | 9.741600000  | 8.474887384 | 2.957400000  |
| O | 9.741600000  | 8.474887384 | 0.000000000  |
| O | 9.741600000  | 8.474887384 | 8.872200000  |
| O | 9.741600000  | 8.474887384 | 5.914800000  |
| O | 1.268453736  | 9.788024384 | 1.479805240  |
| O | 1.267851186  | 9.787942588 | 4.436976337  |
| O | 5.210565447  | 9.774232217 | 1.480664660  |
| O | 5.209767804  | 9.775550961 | 4.439450379  |
| O | 1.267769356  | 9.787003893 | 7.393679337  |
| O | 1.268934062  | 9.788337997 | 10.351447710 |
| O | 5.210067586  | 9.773516766 | 7.398277857  |
| O | 5.210846394  | 9.775329504 | 10.356613342 |
| O | 7.758610944  | 9.782914785 | 1.481672660  |
| O | 7.756753416  | 9.783704174 | 4.439827389  |
| O | 11.700346759 | 9.779755085 | 1.478863840  |
| O | 11.699154647 | 9.779820807 | 4.436524919  |

|   |              |              |              |
|---|--------------|--------------|--------------|
| O | 7.757394284  | 9.782766908  | 7.396823763  |
| O | 7.759144265  | 9.783700960  | 10.356012162 |
| O | 11.699557170 | 9.779113929  | 7.394600863  |
| O | 11.700630305 | 9.780329088  | 10.351933552 |
| O | 9.723211626  | 11.070680241 | 2.958177796  |
| O | 9.721914954  | 11.071523566 | 0.001214782  |
| O | 3.240822759  | 11.071033859 | 2.958080439  |
| O | 3.242623916  | 11.071641796 | 0.001861033  |
| O | 3.241518699  | 11.070822045 | 8.872611788  |
| O | 3.240796911  | 11.071568929 | 5.916314425  |
| O | 9.722951720  | 11.071581788 | 8.873308197  |
| O | 9.722176678  | 11.072187225 | 5.916304370  |
| O | 6.462093347  | 11.795423940 | 8.885833141  |
| O | -0.031335610 | 11.799292662 | 2.955906040  |
| O | 6.461674069  | 11.811782873 | 0.007442238  |
| O | 6.461073337  | 11.791330903 | 5.918786575  |
| O | -0.030634474 | 11.799106923 | -0.001351295 |
| O | -0.031616558 | 11.799136213 | 5.913370275  |
| O | 6.461097756  | 11.799173003 | 2.948561041  |
| O | -0.031269757 | 11.798875821 | 8.869064683  |
| O | 8.431411301  | 13.100700266 | 1.484921778  |
| O | 8.428012262  | 13.090064584 | 4.438843521  |

|   |              |              |              |
|---|--------------|--------------|--------------|
| O | 10.964543579 | 13.112960804 | 1.480989146  |
| O | 10.963776200 | 13.116209801 | 4.439851758  |
| O | 1.954012601  | 13.097970622 | 1.482376166  |
| O | 1.954473964  | 13.099299368 | 4.439339654  |
| O | 4.487434399  | 13.119760267 | 1.484967677  |
| O | 4.491256613  | 13.105121203 | 4.440309918  |
| O | 1.954876357  | 13.100996019 | 7.394612929  |
| O | 1.954418631  | 13.096007864 | 10.352649834 |
| O | 4.491647576  | 13.107520804 | 7.394747786  |
| O | 4.487266194  | 13.113174046 | 10.350837185 |
| O | 8.427692608  | 13.092856379 | 7.395913593  |
| O | 8.431957740  | 13.098369960 | 10.349770273 |
| O | 10.963799580 | 13.115852612 | 7.394021094  |
| O | 10.964194440 | 13.113274773 | 10.352879565 |
| O | -0.036286940 | 14.411252998 | 2.966511868  |
| O | -0.034446168 | 14.411416949 | 5.923064750  |
| O | -0.036451638 | 14.411533750 | 8.881410290  |
| O | -0.035072877 | 14.411293004 | 0.007959783  |
| O | 6.454772730  | 14.418920433 | 2.979394420  |
| O | 6.458848096  | 14.404007405 | 5.918073842  |
| O | 6.453262262  | 14.412688901 | 8.864834536  |
| O | 6.458835886  | 14.427713373 | -0.000661393 |

|   |              |              |              |
|---|--------------|--------------|--------------|
| O | 9.681253126  | 15.114194907 | 8.871501107  |
| O | 3.202429685  | 15.112426818 | 8.875357202  |
| O | 9.672769881  | 15.112874734 | 5.918406135  |
| O | 9.678859030  | 15.111022348 | 2.962768982  |
| O | 3.204708180  | 15.112281084 | 2.970309761  |
| O | 9.686405783  | 15.110885901 | 0.002189896  |
| O | 3.189853928  | 15.109136743 | 0.004973519  |
| O | 3.207043436  | 15.114187406 | 5.917856059  |
| O | 1.231002350  | 16.473616197 | 10.351995066 |
| O | 5.168543302  | 16.496599928 | 4.457062169  |
| O | 5.163881751  | 16.475959004 | 7.392056434  |
| O | 7.720493233  | 16.444610961 | 1.480197154  |
| O | 7.714966888  | 16.493718121 | 4.450446702  |
| O | 5.157134459  | 16.456666115 | 10.361256105 |
| O | 11.646163201 | 16.474441305 | 1.482607908  |
| O | 11.644658318 | 16.465424765 | 4.443838451  |
| O | 1.234708704  | 16.475493943 | 4.444129223  |
| O | 1.231720760  | 16.470504003 | 1.487264512  |
| O | 5.157999513  | 16.445018872 | 1.476201352  |
| O | 7.718195904  | 16.470233610 | 7.398457076  |
| O | 7.718945487  | 16.459172515 | 10.353494704 |
| O | 1.231824930  | 16.470842976 | 7.398880339  |

|   |              |              |              |
|---|--------------|--------------|--------------|
| O | 11.645441803 | 16.460997398 | 7.397900020  |
| O | 11.642825079 | 16.475706114 | 10.355988266 |
| O | 3.200468636  | 17.744793404 | 8.875523881  |
| O | 3.204956136  | 17.734732798 | 0.009283515  |
| O | 9.663285070  | 17.736082261 | 2.960118797  |
| O | 9.680139986  | 17.751578938 | 5.924284618  |
| O | 3.212938403  | 17.741576911 | 2.963588774  |
| O | 3.191705222  | 17.745253465 | 5.928212519  |
| O | 9.662961648  | 17.758590930 | 8.867725809  |
| O | 9.647608367  | 17.736598400 | 0.001092582  |
| O | 6.453510738  | 18.557237900 | 0.016153437  |
| O | 6.498513293  | 18.733222785 | 5.994910051  |
| O | -0.039992515 | 18.512439877 | 0.000816361  |
| O | 6.443877984  | 18.476311206 | 2.857539249  |
| O | -0.075261653 | 18.517888092 | 5.928495601  |
| O | 6.443971244  | 18.488451014 | 8.931999101  |
| O | -0.072610509 | 18.515058078 | 8.866143363  |
| O | -0.050324326 | 18.513833631 | 2.972848275  |
| O | 1.993060051  | 19.974595723 | 4.444219483  |
| O | 4.433108353  | 19.987793170 | 1.484259557  |
| O | 4.483839489  | 19.915081483 | 4.487332105  |
| O | 1.974035356  | 19.962630938 | 7.405394545  |



|   |              |              |              |
|---|--------------|--------------|--------------|
| O | 1.977542072  | 19.959773420 | 10.359884699 |
| O | 4.449640758  | 20.008609473 | 7.403094870  |
| O | 4.450901321  | 19.938133794 | 10.349186956 |
| O | 8.427482839  | 19.995815651 | 1.483478094  |
| O | 8.426511276  | 19.952042406 | 4.467052030  |
| O | 10.905488700 | 19.917724687 | 1.471481105  |
| O | 10.922982016 | 19.952158850 | 4.399335378  |
| O | 8.352399132  | 20.266930165 | 7.316882402  |
| O | 8.438241072  | 20.021792632 | 10.304630294 |
| O | 10.826120768 | 20.011128018 | 7.395469392  |
| O | 10.930895183 | 19.918835547 | 10.390501715 |
| O | 1.969270805  | 19.919414194 | 1.496990336  |
| O | -0.051388758 | 21.118564448 | 0.006139326  |
| O | 6.440312559  | 21.067262714 | 3.081714664  |
| O | -0.050877779 | 21.120349682 | 2.960180311  |
| O | -0.072878728 | 21.117352503 | 5.919899386  |
| O | -0.081805541 | 21.114821456 | 8.876663308  |
| O | 6.386790130  | 21.215635046 | 8.842464526  |
| O | 6.441952005  | 21.195315236 | 0.004008697  |
| H | 0.000000000  | 0.932897449  | 9.814799089  |
| H | 0.816399334  | 0.932897449  | 8.400899272  |
| H | 6.457698847  | 0.932897449  | 6.856699960  |

|   |              |              |              |
|---|--------------|--------------|--------------|
| H | 0.834099172  | 0.932897449  | -0.439201108 |
| H | 0.000000000  | 0.932897449  | 3.899999089  |
| H | 0.816399334  | 0.932897449  | 2.486099272  |
| H | 6.457698847  | 0.932897449  | 0.941899960  |
| H | 0.834099172  | 0.932897449  | 5.475598892  |
| H | 6.494400000  | 0.932897449  | 9.814799089  |
| H | 7.310799334  | 0.932897449  | 8.400899272  |
| H | -0.036701153 | 0.932897449  | 6.856699960  |
| H | 7.328499172  | 0.932897449  | -0.439201108 |
| H | 6.494400000  | 0.932897449  | 3.899999089  |
| H | 7.310799334  | 0.932897449  | 2.486099272  |
| H | -0.036701153 | 0.932897449  | 0.941899960  |
| H | 7.328499172  | 0.932897449  | 5.475598892  |
| H | 7.098611570  | 21.858186528 | 9.006348255  |
| H | 8.412848098  | 21.239472818 | 7.340638131  |

TS7-B4:

|    |             |             |              |
|----|-------------|-------------|--------------|
| Ti | 3.247200000 | 3.247190143 | 1.478700000  |
| Ti | 3.247200000 | 3.247190143 | 4.436100000  |
| Ti | 0.000000000 | 3.247190143 | 2.957400000  |
| Ti | 0.000000000 | 3.247190143 | 0.000000000  |
| Ti | 3.247200000 | 3.247190143 | 7.393500000  |
| Ti | 3.247200000 | 3.247190143 | 10.350900000 |

|    |             |             |              |
|----|-------------|-------------|--------------|
| Ti | 0.000000000 | 3.247190143 | 8.872200000  |
| Ti | 0.000000000 | 3.247190143 | 5.914800000  |
| Ti | 9.741600000 | 3.247190143 | 1.478700000  |
| Ti | 9.741600000 | 3.247190143 | 4.436100000  |
| Ti | 6.494400000 | 3.247190143 | 2.957400000  |
| Ti | 6.494400000 | 3.247190143 | 0.000000000  |
| Ti | 9.741600000 | 3.247190143 | 7.393500000  |
| Ti | 9.741600000 | 3.247190143 | 10.350900000 |
| Ti | 6.494400000 | 3.247190143 | 8.872200000  |
| Ti | 6.494400000 | 3.247190143 | 5.914800000  |
| Ti | 0.000000000 | 6.494389931 | 4.436100000  |
| Ti | 0.000000000 | 6.494389931 | 1.478700000  |
| Ti | 3.247200000 | 6.494389931 | 2.957400000  |
| Ti | 3.247200000 | 6.494389931 | 0.000000000  |
| Ti | 0.000000000 | 6.494389931 | 10.350900000 |
| Ti | 0.000000000 | 6.494389931 | 7.393500000  |
| Ti | 3.247200000 | 6.494389931 | 8.872200000  |
| Ti | 3.247200000 | 6.494389931 | 5.914800000  |
| Ti | 6.494400000 | 6.494389931 | 4.436100000  |
| Ti | 6.494400000 | 6.494389931 | 1.478700000  |
| Ti | 9.741600000 | 6.494389931 | 2.957400000  |
| Ti | 9.741600000 | 6.494389931 | 0.000000000  |

|    |              |              |              |
|----|--------------|--------------|--------------|
| Ti | 6.494400000  | 6.494389931  | 10.350900000 |
| Ti | 6.494400000  | 6.494389931  | 7.393500000  |
| Ti | 9.741600000  | 6.494389931  | 8.872200000  |
| Ti | 9.741600000  | 6.494389931  | 5.914800000  |
| Ti | 3.226646653  | 9.738378939  | 1.479490809  |
| Ti | 3.226478058  | 9.738418230  | 4.436030679  |
| Ti | -0.014320542 | 9.837450515  | 2.960806333  |
| Ti | -0.010267646 | 9.838034520  | 0.001910480  |
| Ti | 3.226623013  | 9.737931023  | 7.393426538  |
| Ti | 3.226410776  | 9.737463105  | 10.351129021 |
| Ti | -0.012975941 | 9.839653661  | 8.872004693  |
| Ti | -0.014564341 | 9.839847258  | 5.916652989  |
| Ti | 9.740935103  | 9.735166732  | 1.474055581  |
| Ti | 9.735592290  | 9.735087793  | 4.442362117  |
| Ti | 6.484028833  | 9.765058870  | 2.964094016  |
| Ti | 6.481545764  | 9.759023792  | 0.009923851  |
| Ti | 9.735035331  | 9.749096417  | 7.394782329  |
| Ti | 9.742629622  | 9.743831084  | 10.347885345 |
| Ti | 6.485438767  | 9.764911350  | 8.887046976  |
| Ti | 6.476634829  | 9.733004305  | 5.925877711  |
| Ti | -0.035920267 | 13.176303046 | 1.508095373  |
| Ti | -0.035323691 | 13.178900173 | 4.465773132  |

|    |              |              |              |
|----|--------------|--------------|--------------|
| Ti | 3.210744465  | 12.995580397 | 2.957615654  |
| Ti | 3.210734983  | 12.995924728 | 5.914820347  |
| Ti | 6.459731724  | 13.128695726 | 1.436094631  |
| Ti | 6.458378810  | 13.019597835 | 4.419649522  |
| Ti | 9.707006669  | 12.984241408 | 2.959761898  |
| Ti | 9.708131239  | 13.014966870 | 5.918622380  |
| Ti | -0.033966491 | 13.180349292 | 7.423363943  |
| Ti | -0.033850891 | 13.178836236 | 10.380368007 |
| Ti | 3.211055547  | 12.992950766 | 8.872626339  |
| Ti | 3.210283882  | 12.994927811 | 0.000366244  |
| Ti | 6.457704432  | 13.022180317 | 7.418537822  |
| Ti | 6.459259321  | 13.128946116 | 10.399179910 |
| Ti | 9.707775216  | 13.010888835 | 8.874191868  |
| Ti | 9.709522860  | 13.008724979 | -0.000460881 |
| Ti | 9.706392948  | 16.285539368 | 1.470248106  |
| Ti | 9.694543916  | 16.297011588 | 4.459108217  |
| Ti | 6.441091107  | 16.322421709 | 2.939930875  |
| Ti | -0.052473063 | 16.648986001 | 5.917353183  |
| Ti | 3.176247121  | 16.311900328 | 1.483140240  |
| Ti | 3.191943826  | 16.320716128 | 4.438887172  |
| Ti | -0.053566591 | 16.645196932 | 2.964739439  |
| Ti | 6.444264401  | 16.294318020 | 5.916563084  |

|    |              |              |              |
|----|--------------|--------------|--------------|
| Ti | 3.185567884  | 16.317639653 | 7.395362097  |
| Ti | 3.180040890  | 16.315364354 | 10.353066591 |
| Ti | -0.052735177 | 16.653954868 | 8.873795695  |
| Ti | 6.442775235  | 16.646962164 | 0.003636537  |
| Ti | 9.697809430  | 16.367033279 | 7.429198421  |
| Ti | 9.696878263  | 16.369760065 | 10.319365126 |
| Ti | 6.440502325  | 16.327088393 | 8.887774733  |
| Ti | -0.051805179 | 16.647269347 | 0.002631495  |
| Ti | 6.425547930  | 19.581939899 | 4.245577431  |
| Ti | 6.429268312  | 19.965257355 | 10.492014234 |
| Ti | 3.194330259  | 19.570192643 | 2.969417454  |
| Ti | 3.197904257  | 19.566884708 | 5.922925161  |
| Ti | 3.209632883  | 19.574484277 | 8.869708331  |
| Ti | 6.419232905  | 19.566656107 | 7.540592795  |
| Ti | 9.666387834  | 19.542261834 | 2.993257055  |
| Ti | 3.194150364  | 19.564332230 | 0.016521338  |
| Ti | -0.058459082 | 20.016032948 | 4.451892989  |
| Ti | -0.073836912 | 20.004753967 | 1.500407907  |
| Ti | 9.817708653  | 19.673444409 | 9.005741515  |
| Ti | 9.680817482  | 19.556582285 | 5.899961896  |
| Ti | -0.092496622 | 20.021201126 | 7.408729309  |
| Ti | -0.005068619 | 20.021629397 | 10.384396222 |

|    |             |              |             |
|----|-------------|--------------|-------------|
| Ti | 9.654721943 | 19.562782027 | 0.064562645 |
| Ti | 6.421232921 | 20.095242987 | 1.510798673 |
| O  | 0.000000000 | 1.266689833  | 2.957400000 |
| O  | 0.000000000 | 1.266689833  | 0.000000000 |
| O  | 0.000000000 | 1.266689833  | 8.872200000 |
| O  | 0.000000000 | 1.266689833  | 5.914800000 |
| O  | 6.494400000 | 1.266689833  | 2.957400000 |
| O  | 6.494400000 | 1.266689833  | 0.000000000 |
| O  | 6.494400000 | 1.266689833  | 8.872200000 |
| O  | 6.494400000 | 1.266689833  | 5.914800000 |
| O  | 9.741600000 | 1.980499953  | 8.872200000 |
| O  | 9.741600000 | 1.980499953  | 5.914800000 |
| O  | 9.741600000 | 1.980499953  | 2.957400000 |
| O  | 9.741600000 | 1.980499953  | 0.000000000 |
| O  | 3.247200000 | 1.980499953  | 8.872200000 |
| O  | 3.247200000 | 1.980499953  | 5.914800000 |
| O  | 3.247200000 | 1.980499953  | 2.957400000 |
| O  | 3.247200000 | 1.980499953  | 0.000000000 |
| O  | 1.266699988 | 3.247190143  | 1.478700000 |
| O  | 1.266699988 | 3.247190143  | 4.436100000 |
| O  | 5.227599998 | 3.247190143  | 1.478700000 |
| O  | 5.227599998 | 3.247190143  | 4.436100000 |

|   |              |             |              |
|---|--------------|-------------|--------------|
| O | 1.266699988  | 3.247190143 | 7.393500000  |
| O | 1.266699988  | 3.247190143 | 10.350900000 |
| O | 5.227599998  | 3.247190143 | 7.393500000  |
| O | 5.227599998  | 3.247190143 | 10.350900000 |
| O | 7.761099988  | 3.247190143 | 1.478700000  |
| O | 7.761099988  | 3.247190143 | 4.436100000  |
| O | 11.721999998 | 3.247190143 | 1.478700000  |
| O | 11.721999998 | 3.247190143 | 4.436100000  |
| O | 7.761099988  | 3.247190143 | 7.393500000  |
| O | 7.761099988  | 3.247190143 | 10.350900000 |
| O | 11.721999998 | 3.247190143 | 7.393500000  |
| O | 11.721999998 | 3.247190143 | 10.350900000 |
| O | 9.741600000  | 4.513899978 | 8.872200000  |
| O | 9.741600000  | 4.513899978 | 5.914800000  |
| O | 9.741600000  | 4.513899978 | 2.957400000  |
| O | 9.741600000  | 4.513899978 | 0.000000000  |
| O | 3.247200000  | 4.513899978 | 8.872200000  |
| O | 3.247200000  | 4.513899978 | 5.914800000  |
| O | 3.247200000  | 4.513899978 | 2.957400000  |
| O | 3.247200000  | 4.513899978 | 0.000000000  |
| O | 0.000000000  | 5.227600085 | 2.957400000  |
| O | 0.000000000  | 5.227600085 | 0.000000000  |



|   |              |             |              |
|---|--------------|-------------|--------------|
| O | 0.000000000  | 5.227600085 | 8.872200000  |
| O | 0.000000000  | 5.227600085 | 5.914800000  |
| O | 6.494400000  | 5.227600085 | 0.000000000  |
| O | 6.494400000  | 5.227600085 | 2.957400000  |
| O | 6.494400000  | 5.227600085 | 8.872200000  |
| O | 6.494400000  | 5.227600085 | 5.914800000  |
| O | 8.474900012  | 6.494389931 | 7.393500000  |
| O | 11.008299988 | 6.494389931 | 7.393500000  |
| O | 8.474900012  | 6.494389931 | 10.350900000 |
| O | 11.008299988 | 6.494389931 | 10.350900000 |
| O | 8.474900012  | 6.494389931 | 1.478700000  |
| O | 11.008299988 | 6.494389931 | 1.478700000  |
| O | 8.474900012  | 6.494389931 | 4.436100000  |
| O | 11.008299988 | 6.494389931 | 4.436100000  |
| O | 1.980500012  | 6.494389931 | 1.478700000  |
| O | 4.513899988  | 6.494389931 | 1.478700000  |
| O | 1.980500012  | 6.494389931 | 4.436100000  |
| O | 4.513899988  | 6.494389931 | 4.436100000  |
| O | 1.980500012  | 6.494389931 | 7.393500000  |
| O | 4.513899988  | 6.494389931 | 7.393500000  |
| O | 1.980500012  | 6.494389931 | 10.350900000 |
| O | 4.513899988  | 6.494389931 | 10.350900000 |

|   |             |             |              |
|---|-------------|-------------|--------------|
| O | 0.000000000 | 7.761090122 | 8.872200000  |
| O | 0.000000000 | 7.761090122 | 5.914800000  |
| O | 6.494400000 | 7.761090122 | 2.957400000  |
| O | 6.494400000 | 7.761090122 | 0.000000000  |
| O | 0.000000000 | 7.761090122 | 2.957400000  |
| O | 0.000000000 | 7.761090122 | 0.000000000  |
| O | 6.494400000 | 7.761090122 | 8.872200000  |
| O | 6.494400000 | 7.761090122 | 5.914800000  |
| O | 3.247200000 | 8.474889884 | 2.957400000  |
| O | 3.247200000 | 8.474889884 | 0.000000000  |
| O | 3.247200000 | 8.474889884 | 8.872200000  |
| O | 3.247200000 | 8.474889884 | 5.914800000  |
| O | 9.741600000 | 8.474889884 | 2.957400000  |
| O | 9.741600000 | 8.474889884 | 0.000000000  |
| O | 9.741600000 | 8.474889884 | 8.872200000  |
| O | 9.741600000 | 8.474889884 | 5.914800000  |
| O | 1.269608051 | 9.786419531 | 1.479272434  |
| O | 1.268880938 | 9.785621212 | 4.436516639  |
| O | 5.211568312 | 9.774529399 | 1.481367930  |
| O | 5.210800154 | 9.773541055 | 4.440702897  |
| O | 1.269006150 | 9.785719439 | 7.393514432  |
| O | 1.269890817 | 9.786601340 | 10.351078154 |

|   |              |              |              |
|---|--------------|--------------|--------------|
| O | 5.210808597  | 9.772783812  | 7.397012800  |
| O | 5.211744960  | 9.774832295  | 10.354940045 |
| O | 7.758932158  | 9.782813700  | 1.481613512  |
| O | 7.757699001  | 9.781585682  | 4.441600054  |
| O | 11.700616796 | 9.777573012  | 1.478748975  |
| O | 11.699879292 | 9.777618018  | 4.436178549  |
| O | 7.757923058  | 9.781673908  | 7.394810483  |
| O | 7.759182452  | 9.783285905  | 10.355615397 |
| O | 11.700110753 | 9.778162733  | 7.394015771  |
| O | 11.700960480 | 9.778518136  | 10.351650233 |
| O | 9.724135260  | 11.069900496 | 2.958875861  |
| O | 9.722244350  | 11.075341567 | 0.002303578  |
| O | 3.241527531  | 11.070550224 | 2.958664821  |
| O | 3.244073336  | 11.071529281 | 0.000668372  |
| O | 3.241547274  | 11.070537365 | 8.872031901  |
| O | 3.242262438  | 11.071438555 | 5.915986627  |
| O | 9.723554011  | 11.075272630 | 8.872535133  |
| O | 9.721920929  | 11.075733047 | 5.914618179  |
| O | 6.462679792  | 11.796818408 | 8.875430191  |
| O | -0.031175978 | 11.795722193 | 2.955344962  |
| O | 6.463958929  | 11.805028057 | 0.002831060  |
| O | 6.463059844  | 11.796280124 | 5.918500299  |

|   |              |              |              |
|---|--------------|--------------|--------------|
| O | -0.030555373 | 11.795482876 | -0.001748415 |
| O | -0.031038166 | 11.795986871 | 5.912336604  |
| O | 6.462587311  | 11.797602440 | 2.957434897  |
| O | -0.029667069 | 11.795905074 | 8.869226157  |
| O | 8.434631614  | 13.098843593 | 1.485040902  |
| O | 8.430010070  | 13.094936295 | 4.438678616  |
| O | 10.965304333 | 13.115408268 | 1.480772428  |
| O | 10.965091966 | 13.117742860 | 4.439365798  |
| O | 1.955911694  | 13.093515751 | 1.479395226  |
| O | 1.955965597  | 13.096777965 | 4.439270451  |
| O | 4.487452453  | 13.113197620 | 1.484553168  |
| O | 4.490375063  | 13.107864778 | 4.438090212  |
| O | 1.956352664  | 13.097588429 | 7.394012458  |
| O | 1.956218100  | 13.093038903 | 10.352366279 |
| O | 4.490741477  | 13.110113287 | 7.394952911  |
| O | 4.487540518  | 13.111282726 | 10.347971464 |
| O | 8.430030982  | 13.096824400 | 7.396561974  |
| O | 8.434131805  | 13.096303617 | 10.348293821 |
| O | 10.966059631 | 13.114114169 | 7.395216593  |
| O | 10.966408121 | 13.110814450 | 10.352762807 |
| O | -0.032067659 | 14.406306992 | 2.964186050  |
| O | -0.029755782 | 14.407146745 | 5.922997440  |

|   |              |              |              |
|---|--------------|--------------|--------------|
| O | -0.032714241 | 14.407750396 | 8.881255677  |
| O | -0.030634994 | 14.407461072 | 0.006608251  |
| O | 6.461321813  | 14.410498257 | 2.967843762  |
| O | 6.454492951  | 14.412037030 | 5.913519564  |
| O | 6.458493891  | 14.410331449 | 8.867370566  |
| O | 6.460273617  | 14.401801758 | 0.001793722  |
| O | 9.688709087  | 15.120683973 | 8.881001104  |
| O | 3.197463936  | 15.114813917 | 8.875502588  |
| O | 9.677909289  | 15.116526284 | 5.928515948  |
| O | 9.680913988  | 15.110920191 | 2.964603517  |
| O | 3.198079086  | 15.111776018 | 2.963071702  |
| O | 9.690888607  | 15.121434429 | -0.007854973 |
| O | 3.190687290  | 15.112247151 | -0.000144321 |
| O | 3.203615952  | 15.114536380 | 5.917569191  |
| O | 1.236380882  | 16.481551881 | 10.350428472 |
| O | 5.163944487  | 16.459460768 | 4.430007519  |
| O | 5.162540787  | 16.457784476 | 7.399232624  |
| O | 7.719793526  | 16.451155749 | 1.470440928  |
| O | 7.714501239  | 16.479917738 | 4.435492313  |
| O | 5.161588838  | 16.449821288 | 10.363144464 |
| O | 11.654291202 | 16.469347780 | 1.482178257  |
| O | 11.653524863 | 16.459551137 | 4.443108683  |

|   |              |              |              |
|---|--------------|--------------|--------------|
| O | 1.236844452  | 16.477624580 | 4.442306400  |
| O | 1.235889256  | 16.470670810 | 1.486881351  |
| O | 5.161532077  | 16.435060422 | 1.467052576  |
| O | 7.708800975  | 16.454290803 | 7.390086332  |
| O | 7.714286794  | 16.449968807 | 10.369534696 |
| O | 1.236472583  | 16.481581885 | 7.400384827  |
| O | 11.659414245 | 16.461831079 | 7.398458613  |
| O | 11.656156654 | 16.480743918 | 10.358020473 |
| O | 3.214613569  | 17.748887513 | 8.873271525  |
| O | 3.216193526  | 17.741628703 | 0.006156242  |
| O | 9.675885634  | 17.723435244 | 2.966521805  |
| O | 9.682895560  | 17.728435900 | 5.925779052  |
| O | 3.217332125  | 17.743729693 | 2.960624394  |
| O | 3.207211511  | 17.743371432 | 5.921980922  |
| O | 9.654602706  | 17.755639828 | 8.861738375  |
| O | 9.661580809  | 17.740678936 | 0.021954673  |
| O | 6.437234473  | 18.568542241 | 0.005972292  |
| O | 6.403355396  | 18.602676364 | 5.919845088  |
| O | -0.029122708 | 18.514314766 | 0.011325186  |
| O | 6.410684586  | 18.463367722 | 2.837619385  |
| O | -0.074046291 | 18.521916121 | 5.927583776  |
| O | 6.458834328  | 18.453356408 | 8.945193364  |

|   |              |              |              |
|---|--------------|--------------|--------------|
| O | -0.086053528 | 18.526896418 | 8.877565670  |
| O | -0.054913269 | 18.513191047 | 2.976146367  |
| O | 1.985311063  | 19.942991575 | 4.449487558  |
| O | 4.423959952  | 19.990279925 | 1.479174722  |
| O | 4.460140514  | 19.945600846 | 4.467443117  |
| O | 1.989032354  | 19.948614456 | 7.405983540  |
| O | 1.998308566  | 19.951455186 | 10.350754023 |
| O | 4.485338396  | 19.975390113 | 7.392141725  |
| O | 4.455989683  | 19.964808010 | 10.346833457 |
| O | 8.438038317  | 19.973246260 | 1.505591165  |
| O | 8.387433822  | 19.892225983 | 4.436352325  |
| O | 10.907572753 | 19.921763431 | 1.504943021  |
| O | 10.893842942 | 19.967048304 | 4.424901273  |
| O | 8.307994711  | 20.083828632 | 7.194710433  |
| O | 8.450917881  | 19.952976100 | 10.377301656 |
| O | 10.855912919 | 20.040435436 | 7.387927430  |
| O | 10.950747914 | 19.965140196 | 10.480830530 |
| O | 1.973932485  | 19.909264648 | 1.493746896  |
| O | -0.014050245 | 21.128172852 | 0.030361851  |
| O | 6.428135818  | 21.053999187 | 3.067794182  |
| O | -0.040066421 | 21.122035618 | 2.972564601  |
| O | -0.038137325 | 21.126446911 | 5.926382480  |

|   |              |              |              |
|---|--------------|--------------|--------------|
| O | -0.060901885 | 21.120911542 | 8.892988748  |
| O | 6.477844476  | 21.146903525 | 8.816777141  |
| O | 6.453469823  | 21.200047286 | 0.001479410  |
| H | 0.000000000  | 0.932899949  | 9.814800036  |
| H | 0.816399984  | 0.932899949  | 8.400899982  |
| H | 6.457700016  | 0.932899949  | 6.856699960  |
| H | 0.834099951  | 0.932899949  | -0.439200043 |
| H | 0.000000000  | 0.932899949  | 3.900000036  |
| H | 0.816399984  | 0.932899949  | 2.486099982  |
| H | 6.457700016  | 0.932899949  | 0.941899960  |
| H | 0.834099951  | 0.932899949  | 5.475599957  |
| H | 6.494400000  | 0.932899949  | 9.814800036  |
| H | 7.310799984  | 0.932899949  | 8.400899982  |
| H | -0.036699984 | 0.932899949  | 6.856699960  |
| H | 7.328499951  | 0.932899949  | -0.439200043 |
| H | 6.494400000  | 0.932899949  | 3.900000036  |
| H | 7.310799984  | 0.932899949  | 2.486099982  |
| H | -0.036699984 | 0.932899949  | 0.941899960  |
| H | 7.328499951  | 0.932899949  | 5.475599957  |
| H | 7.307174550  | 21.677428874 | 8.802164154  |
| H | 8.844639712  | 20.924106424 | 8.072398970  |

7-Be:



|    |             |             |              |
|----|-------------|-------------|--------------|
| Ti | 3.247200000 | 3.247194072 | 1.478700000  |
| Ti | 3.247200000 | 3.247194072 | 4.436100000  |
| Ti | 0.000000000 | 3.247194072 | 2.957400000  |
| Ti | 0.000000000 | 3.247194072 | 0.000000000  |
| Ti | 3.247200000 | 3.247194072 | 7.393500000  |
| Ti | 3.247200000 | 3.247194072 | 10.350900000 |
| Ti | 0.000000000 | 3.247194072 | 8.872200000  |
| Ti | 0.000000000 | 3.247194072 | 5.914800000  |
| Ti | 9.741600000 | 3.247194072 | 1.478700000  |
| Ti | 9.741600000 | 3.247194072 | 4.436100000  |
| Ti | 6.494400000 | 3.247194072 | 2.957400000  |
| Ti | 6.494400000 | 3.247194072 | 0.000000000  |
| Ti | 9.741600000 | 3.247194072 | 7.393500000  |
| Ti | 9.741600000 | 3.247194072 | 10.350900000 |
| Ti | 6.494400000 | 3.247194072 | 8.872200000  |
| Ti | 6.494400000 | 3.247194072 | 5.914800000  |
| Ti | 0.000000000 | 6.494391717 | 4.436100000  |
| Ti | 0.000000000 | 6.494391717 | 1.478700000  |
| Ti | 3.247200000 | 6.494391717 | 2.957400000  |
| Ti | 3.247200000 | 6.494391717 | 0.000000000  |
| Ti | 0.000000000 | 6.494391717 | 10.350900000 |
| Ti | 0.000000000 | 6.494391717 | 7.393500000  |

|    |              |             |              |
|----|--------------|-------------|--------------|
| Ti | 3.247200000  | 6.494391717 | 8.872200000  |
| Ti | 3.247200000  | 6.494391717 | 5.914800000  |
| Ti | 6.494400000  | 6.494391717 | 4.436100000  |
| Ti | 6.494400000  | 6.494391717 | 1.478700000  |
| Ti | 9.741600000  | 6.494391717 | 2.957400000  |
| Ti | 9.741600000  | 6.494391717 | 0.000000000  |
| Ti | 6.494400000  | 6.494391717 | 10.350900000 |
| Ti | 6.494400000  | 6.494391717 | 7.393500000  |
| Ti | 9.741600000  | 6.494391717 | 8.872200000  |
| Ti | 9.741600000  | 6.494391717 | 5.914800000  |
| Ti | 3.226479877  | 9.738928654 | 1.479937968  |
| Ti | 3.227860976  | 9.738269639 | 4.435866011  |
| Ti | -0.013023350 | 9.836960807 | 2.958886034  |
| Ti | -0.010890329 | 9.837418367 | 0.000541677  |
| Ti | 3.227644193  | 9.737722425 | 7.392935846  |
| Ti | 3.225971365  | 9.736758369 | 10.352202676 |
| Ti | -0.012892813 | 9.837224056 | 8.870637783  |
| Ti | -0.012532633 | 9.837169763 | 5.915563601  |
| Ti | 9.741150588  | 9.733500442 | 1.469325988  |
| Ti | 9.737664913  | 9.733642603 | 4.443843774  |
| Ti | 6.483321593  | 9.760015708 | 2.963160542  |
| Ti | 6.483024019  | 9.759313830 | 0.009615217  |

|    |              |              |              |
|----|--------------|--------------|--------------|
| Ti | 9.735854534  | 9.751645681  | 7.393716245  |
| Ti | 9.741965894  | 9.748253450  | 10.347284164 |
| Ti | 6.483836339  | 9.760208233  | 8.887480531  |
| Ti | 6.479942686  | 9.730416466  | 5.926005234  |
| Ti | -0.034104952 | 13.173384092 | 1.504577723  |
| Ti | -0.034560209 | 13.175013234 | 4.462856426  |
| Ti | 3.211374032  | 12.995320362 | 2.958561548  |
| Ti | 3.210771871  | 12.996039743 | 5.915189549  |
| Ti | 6.462211935  | 13.129946247 | 1.434330719  |
| Ti | 6.461563274  | 13.007369801 | 4.413591347  |
| Ti | 9.708505317  | 12.976517895 | 2.959897229  |
| Ti | 9.709539875  | 13.025804721 | 5.921894803  |
| Ti | -0.031380551 | 13.176171600 | 7.420700509  |
| Ti | -0.030607458 | 13.177499275 | 10.376796414 |
| Ti | 3.212841637  | 12.991415207 | 8.872580440  |
| Ti | 3.210948519  | 12.994194858 | 0.000671921  |
| Ti | 6.459071373  | 13.012072204 | 7.420863048  |
| Ti | 6.459081375  | 13.125963582 | 10.401996301 |
| Ti | 9.709888624  | 13.017760094 | 8.875080153  |
| Ti | 9.711281803  | 13.019117415 | -0.000618097 |
| Ti | 9.709448174  | 16.265761772 | 1.459014008  |
| Ti | 9.699665659  | 16.270990672 | 4.473017934  |

|    |              |              |              |
|----|--------------|--------------|--------------|
| Ti | 6.448208970  | 16.318039348 | 2.944712636  |
| Ti | -0.051046893 | 16.638484980 | 5.919709284  |
| Ti | 3.181374970  | 16.318022917 | 1.482740636  |
| Ti | 3.193073592  | 16.319827440 | 4.438357679  |
| Ti | -0.050649436 | 16.639039338 | 2.965060731  |
| Ti | 6.449649687  | 16.273751749 | 5.919600215  |
| Ti | 3.193122690  | 16.316946347 | 7.396714221  |
| Ti | 3.178323121  | 16.313808435 | 10.355979275 |
| Ti | -0.049343282 | 16.649684307 | 8.871217552  |
| Ti | 6.444450011  | 16.656103721 | 0.006453165  |
| Ti | 9.692558058  | 16.414682747 | 7.475629601  |
| Ti | 9.704283957  | 16.407130327 | 10.291966352 |
| Ti | 6.436281614  | 16.316822760 | 8.898192470  |
| Ti | -0.052624123 | 16.644744730 | 0.003418400  |
| Ti | 6.447568102  | 19.583990882 | 4.250533797  |
| Ti | 6.417977018  | 19.985964358 | 10.501369081 |
| Ti | 3.206524274  | 19.572048600 | 2.965182812  |
| Ti | 3.216098059  | 19.565870290 | 5.916089781  |
| Ti | 3.210114248  | 19.574410339 | 8.873970181  |
| Ti | 6.429071402  | 19.531622580 | 7.563876524  |
| Ti | 9.686286416  | 19.535339854 | 2.965552251  |
| Ti | 3.194129452  | 19.572303991 | 0.014944570  |

|    |              |              |              |
|----|--------------|--------------|--------------|
| Ti | -0.066890242 | 20.000934537 | 4.439472264  |
| Ti | -0.068755823 | 20.002053970 | 1.484433925  |
| Ti | 9.686135096  | 19.979209900 | 8.882287455  |
| Ti | 9.662506781  | 19.546169489 | 5.926073727  |
| Ti | -0.039185002 | 20.006931753 | 7.392006986  |
| Ti | -0.034914804 | 20.012758589 | 10.355214255 |
| Ti | 9.680389760  | 19.549488496 | 0.002869151  |
| Ti | 6.447243382  | 20.086172511 | 1.514703033  |
| O  | 0.000000000  | 1.266694833  | 2.957400000  |
| O  | 0.000000000  | 1.266694833  | 0.000000000  |
| O  | 0.000000000  | 1.266694833  | 8.872200000  |
| O  | 0.000000000  | 1.266694833  | 5.914800000  |
| O  | 6.494400000  | 1.266694833  | 2.957400000  |
| O  | 6.494400000  | 1.266694833  | 0.000000000  |
| O  | 6.494400000  | 1.266694833  | 8.872200000  |
| O  | 6.494400000  | 1.266694833  | 5.914800000  |
| O  | 9.741600000  | 1.980495667  | 8.872200000  |
| O  | 9.741600000  | 1.980495667  | 5.914800000  |
| O  | 9.741600000  | 1.980495667  | 2.957400000  |
| O  | 9.741600000  | 1.980495667  | 0.000000000  |
| O  | 3.247200000  | 1.980495667  | 8.872200000  |
| O  | 3.247200000  | 1.980495667  | 5.914800000  |

|   |              |             |              |
|---|--------------|-------------|--------------|
| O | 3.247200000  | 1.980495667 | 2.957400000  |
| O | 3.247200000  | 1.980495667 | 0.000000000  |
| O | 1.266698949  | 3.247194072 | 1.478700000  |
| O | 1.266698949  | 3.247194072 | 4.436100000  |
| O | 5.227599738  | 3.247194072 | 1.478700000  |
| O | 5.227599738  | 3.247194072 | 4.436100000  |
| O | 1.266698949  | 3.247194072 | 7.393500000  |
| O | 1.266698949  | 3.247194072 | 10.350900000 |
| O | 5.227599738  | 3.247194072 | 7.393500000  |
| O | 5.227599738  | 3.247194072 | 10.350900000 |
| O | 7.761098949  | 3.247194072 | 1.478700000  |
| O | 7.761098949  | 3.247194072 | 4.436100000  |
| O | 11.721999738 | 3.247194072 | 1.478700000  |
| O | 11.721999738 | 3.247194072 | 4.436100000  |
| O | 7.761098949  | 3.247194072 | 7.393500000  |
| O | 7.761098949  | 3.247194072 | 10.350900000 |
| O | 11.721999738 | 3.247194072 | 7.393500000  |
| O | 11.721999738 | 3.247194072 | 10.350900000 |
| O | 9.741600000  | 4.513896049 | 8.872200000  |
| O | 9.741600000  | 4.513896049 | 5.914800000  |
| O | 9.741600000  | 4.513896049 | 2.957400000  |
| O | 9.741600000  | 4.513896049 | 0.000000000  |

|   |              |             |              |
|---|--------------|-------------|--------------|
| O | 3.247200000  | 4.513896049 | 8.872200000  |
| O | 3.247200000  | 4.513896049 | 5.914800000  |
| O | 3.247200000  | 4.513896049 | 2.957400000  |
| O | 3.247200000  | 4.513896049 | 0.000000000  |
| O | 0.000000000  | 5.227596870 | 2.957400000  |
| O | 0.000000000  | 5.227596870 | 0.000000000  |
| O | 0.000000000  | 5.227596870 | 8.872200000  |
| O | 0.000000000  | 5.227596870 | 5.914800000  |
| O | 6.494400000  | 5.227596870 | 0.000000000  |
| O | 6.494400000  | 5.227596870 | 2.957400000  |
| O | 6.494400000  | 5.227596870 | 8.872200000  |
| O | 6.494400000  | 5.227596870 | 5.914800000  |
| O | 8.474899752  | 6.494391717 | 7.393500000  |
| O | 11.008298949 | 6.494391717 | 7.393500000  |
| O | 8.474899752  | 6.494391717 | 10.350900000 |
| O | 11.008298949 | 6.494391717 | 10.350900000 |
| O | 8.474899752  | 6.494391717 | 1.478700000  |
| O | 11.008298949 | 6.494391717 | 1.478700000  |
| O | 8.474899752  | 6.494391717 | 4.436100000  |
| O | 11.008298949 | 6.494391717 | 4.436100000  |
| O | 1.980499752  | 6.494391717 | 1.478700000  |
| O | 4.513898949  | 6.494391717 | 1.478700000  |

|   |             |             |              |
|---|-------------|-------------|--------------|
| O | 1.980499752 | 6.494391717 | 4.436100000  |
| O | 4.513898949 | 6.494391717 | 4.436100000  |
| O | 1.980499752 | 6.494391717 | 7.393500000  |
| O | 4.513898949 | 6.494391717 | 7.393500000  |
| O | 1.980499752 | 6.494391717 | 10.350900000 |
| O | 4.513898949 | 6.494391717 | 10.350900000 |
| O | 0.000000000 | 7.761086550 | 8.872200000  |
| O | 0.000000000 | 7.761086550 | 5.914800000  |
| O | 6.494400000 | 7.761086550 | 2.957400000  |
| O | 6.494400000 | 7.761086550 | 0.000000000  |
| O | 0.000000000 | 7.761086550 | 2.957400000  |
| O | 0.000000000 | 7.761086550 | 0.000000000  |
| O | 6.494400000 | 7.761086550 | 8.872200000  |
| O | 6.494400000 | 7.761086550 | 5.914800000  |
| O | 3.247200000 | 8.474887384 | 2.957400000  |
| O | 3.247200000 | 8.474887384 | 0.000000000  |
| O | 3.247200000 | 8.474887384 | 8.872200000  |
| O | 3.247200000 | 8.474887384 | 5.914800000  |
| O | 9.741600000 | 8.474887384 | 2.957400000  |
| O | 9.741600000 | 8.474887384 | 0.000000000  |
| O | 9.741600000 | 8.474887384 | 8.872200000  |
| O | 9.741600000 | 8.474887384 | 5.914800000  |



|   |              |              |              |
|---|--------------|--------------|--------------|
| O | 1.270846533  | 9.785494409  | 1.478362856  |
| O | 1.269977582  | 9.784736095  | 4.436530597  |
| O | 5.211574417  | 9.773659284  | 1.481143286  |
| O | 5.211742102  | 9.772550567  | 4.441278289  |
| O | 1.270112276  | 9.784769671  | 7.393224252  |
| O | 1.270872510  | 9.785838740  | 10.350847358 |
| O | 5.211673391  | 9.770999292  | 7.396423686  |
| O | 5.211699758  | 9.774096485  | 10.355351597 |
| O | 7.758663679  | 9.781237422  | 1.481756414  |
| O | 7.758585357  | 9.780088700  | 4.440922691  |
| O | 11.702042317 | 9.776730045  | 1.478869518  |
| O | 11.701333388 | 9.776392857  | 4.435882690  |
| O | 7.758530414  | 9.781182058  | 7.395683271  |
| O | 7.758404812  | 9.782529020  | 10.355416660 |
| O | 11.701048025 | 9.777536222  | 7.393287304  |
| O | 11.702248969 | 9.777576227  | 10.351169123 |
| O | 9.725697682  | 11.066467545 | 2.959695179  |
| O | 9.723646231  | 11.074005678 | 0.002510833  |
| O | 3.243258289  | 11.070196249 | 2.959161664  |
| O | 3.244658871  | 11.071002069 | 0.000357254  |
| O | 3.243343236  | 11.069770122 | 8.872227326  |
| O | 3.244160231  | 11.070768467 | 5.916385521  |

|   |              |              |              |
|---|--------------|--------------|--------------|
| O | 9.725311136  | 11.073914594 | 8.872206033  |
| O | 9.723146292  | 11.075303348 | 5.914366090  |
| O | 6.463474057  | 11.793074703 | 8.878024658  |
| O | -0.027494822 | 11.793777295 | 2.955945906  |
| O | 6.464463154  | 11.803332121 | 0.002905113  |
| O | 6.463895284  | 11.792362109 | 5.918544423  |
| O | -0.027735374 | 11.794065547 | -0.002350068 |
| O | -0.027887863 | 11.795014957 | 5.912818897  |
| O | 6.463273640  | 11.793456181 | 2.955969565  |
| O | -0.027187377 | 11.793959819 | 8.868820165  |
| O | 8.436842048  | 13.092813516 | 1.486332813  |
| O | 8.431733553  | 13.090547862 | 4.438186150  |
| O | 10.967511519 | 13.109664657 | 1.482093557  |
| O | 10.967152899 | 13.113210479 | 4.438843521  |
| O | 1.959063166  | 13.092697787 | 1.480418959  |
| O | 1.959108887  | 13.096200032 | 4.439057163  |
| O | 4.490054370  | 13.111412743 | 1.484733569  |
| O | 4.494628506  | 13.108043730 | 4.438824593  |
| O | 1.959643766  | 13.097098364 | 7.393822120  |
| O | 1.959123305  | 13.092899956 | 10.352472627 |
| O | 4.493737994  | 13.109314253 | 7.395529368  |
| O | 4.489824598  | 13.111116633 | 10.348286723 |

|   |              |              |              |
|---|--------------|--------------|--------------|
| O | 8.431468972  | 13.091514417 | 7.397792370  |
| O | 8.435775928  | 13.091246525 | 10.347739959 |
| O | 10.968378911 | 13.111663490 | 7.395824871  |
| O | 10.969493480 | 13.107585455 | 10.351970224 |
| O | -0.027876822 | 14.402912975 | 2.963592914  |
| O | -0.026115281 | 14.403523770 | 5.921098907  |
| O | -0.027430527 | 14.403395539 | 8.879452136  |
| O | -0.024826143 | 14.403212657 | 0.007199258  |
| O | 6.465836720  | 14.407658598 | 2.969603060  |
| O | 6.462358838  | 14.405023609 | 5.916041990  |
| O | 6.463523674  | 14.404910023 | 8.867527071  |
| O | 6.463377940  | 14.398347019 | 0.003172226  |
| O | 9.684684118  | 15.113573754 | 8.878642164  |
| O | 3.202495018  | 15.114296706 | 8.876404950  |
| O | 9.679081399  | 15.112768291 | 5.931308325  |
| O | 9.682354836  | 15.107115406 | 2.965283009  |
| O | 3.206179551  | 15.113732703 | 2.961945760  |
| O | 9.693360896  | 15.113241925 | -0.005598831 |
| O | 3.192499617  | 15.112594697 | 0.004620642  |
| O | 3.209377524  | 15.113389801 | 5.917121677  |
| O | 1.241031002  | 16.480061686 | 10.354311302 |
| O | 5.173714792  | 16.464493928 | 4.436511433  |

|   |              |              |              |
|---|--------------|--------------|--------------|
| O | 5.167542125  | 16.449066903 | 7.398088110  |
| O | 7.724252971  | 16.457573377 | 1.468619643  |
| O | 7.719965368  | 16.475505731 | 4.438571558  |
| O | 5.163005007  | 16.433473071 | 10.372784760 |
| O | 11.661196698 | 16.456997230 | 1.483968786  |
| O | 11.658899498 | 16.453219234 | 4.440832313  |
| O | 1.243385222  | 16.469457437 | 4.438912961  |
| O | 1.240944756  | 16.476134742 | 1.483399900  |
| O | 5.168417960  | 16.435391894 | 1.473707436  |
| O | 7.707030861  | 16.472130288 | 7.396638748  |
| O | 7.712492262  | 16.453707512 | 10.377257768 |
| O | 1.243111158  | 16.471697731 | 7.399561014  |
| O | 11.666465864 | 16.458791037 | 7.394394081  |
| O | 11.667658496 | 16.460670926 | 10.358243579 |
| O | 3.222282026  | 17.748952164 | 8.875930346  |
| O | 3.226370641  | 17.747290161 | 0.004390911  |
| O | 9.684044029  | 17.729174211 | 2.961850296  |
| O | 9.692920445  | 17.728492336 | 5.912085580  |
| O | 3.223686245  | 17.743898644 | 2.960890797  |
| O | 3.215327433  | 17.742568112 | 5.922284233  |
| O | 9.670546198  | 17.718957870 | 8.877288029  |
| O | 9.694052419  | 17.731196620 | 0.016280605  |

|   |              |              |              |
|---|--------------|--------------|--------------|
| O | 6.413883858  | 18.575070598 | 0.010338952  |
| O | 6.424005250  | 18.618037309 | 5.935031928  |
| O | -0.059803682 | 18.513390716 | -0.002330549 |
| O | 6.434016887  | 18.462047549 | 2.847248561  |
| O | -0.051679058 | 18.511417243 | 5.924940925  |
| O | 6.398617991  | 18.435775529 | 8.972325734  |
| O | -0.054213173 | 18.518605686 | 8.873599205  |
| O | -0.054372675 | 18.507019523 | 2.970667843  |
| O | 1.995431027  | 19.940210138 | 4.446401216  |
| O | 4.432649069  | 19.989363376 | 1.483300768  |
| O | 4.478023364  | 19.934754065 | 4.465301959  |
| O | 2.003773733  | 19.955801471 | 7.398186414  |
| O | 1.987365632  | 19.937745529 | 10.350923304 |
| O | 4.494593436  | 19.970240866 | 7.397360353  |
| O | 4.447797387  | 19.997457295 | 10.346162482 |
| O | 8.451476529  | 19.947884360 | 1.480383234  |
| O | 8.411001610  | 19.902412677 | 4.462817033  |
| O | 10.908448328 | 19.919220598 | 1.489289858  |
| O | 10.889922793 | 19.940624836 | 4.444839590  |
| O | 8.370590466  | 19.903020614 | 7.346536370  |
| O | 8.410413218  | 19.891884867 | 10.390714766 |
| O | 10.894656171 | 19.975586567 | 7.373067087  |

|   |              |              |              |
|---|--------------|--------------|--------------|
| O | 10.904554026 | 19.986258325 | 10.375818934 |
| O | 1.974840402  | 19.911804267 | 1.488907170  |
| O | -0.034118201 | 21.116052690 | 0.008801696  |
| O | 6.452637761  | 21.048056265 | 3.074248175  |
| O | -0.047127393 | 21.110516606 | 2.963609357  |
| O | -0.036414101 | 21.115298305 | 5.915718568  |
| O | -0.041638716 | 21.116033758 | 8.872682174  |
| O | 6.521002621  | 21.133945752 | 8.802752559  |
| O | 6.456586486  | 21.206592431 | 0.015529899  |
| H | 0.000000000  | 0.932897449  | 9.814799089  |
| H | 0.816399334  | 0.932897449  | 8.400899272  |
| H | 6.457698847  | 0.932897449  | 6.856699960  |
| H | 0.834099172  | 0.932897449  | -0.439201108 |
| H | 0.000000000  | 0.932897449  | 3.899999089  |
| H | 0.816399334  | 0.932897449  | 2.486099272  |
| H | 6.457698847  | 0.932897449  | 0.941899960  |
| H | 0.834099172  | 0.932897449  | 5.475598892  |
| H | 6.494400000  | 0.932897449  | 9.814799089  |
| H | 7.310799334  | 0.932897449  | 8.400899272  |
| H | -0.036701153 | 0.932897449  | 6.856699960  |
| H | 7.328499172  | 0.932897449  | -0.439201108 |
| H | 6.494400000  | 0.932897449  | 3.899999089  |

|   |              |              |             |
|---|--------------|--------------|-------------|
| H | 7.310799334  | 0.932897449  | 2.486099272 |
| H | -0.036701153 | 0.932897449  | 0.941899960 |
| H | 7.328499172  | 0.932897449  | 5.475598892 |
| H | 9.341402343  | 21.673750534 | 8.853515975 |
| H | 7.393807767  | 21.598764977 | 8.773863138 |

TS7-B5:

|    |             |             |              |
|----|-------------|-------------|--------------|
| Ti | 3.247200000 | 3.247194072 | 1.478700000  |
| Ti | 3.247200000 | 3.247194072 | 4.436100000  |
| Ti | 0.000000000 | 3.247194072 | 2.957400000  |
| Ti | 0.000000000 | 3.247194072 | 0.000000000  |
| Ti | 3.247200000 | 3.247194072 | 7.393500000  |
| Ti | 3.247200000 | 3.247194072 | 10.350900000 |
| Ti | 0.000000000 | 3.247194072 | 8.872200000  |
| Ti | 0.000000000 | 3.247194072 | 5.914800000  |
| Ti | 9.741600000 | 3.247194072 | 1.478700000  |
| Ti | 9.741600000 | 3.247194072 | 4.436100000  |
| Ti | 6.494400000 | 3.247194072 | 2.957400000  |
| Ti | 6.494400000 | 3.247194072 | 0.000000000  |
| Ti | 9.741600000 | 3.247194072 | 7.393500000  |
| Ti | 9.741600000 | 3.247194072 | 10.350900000 |
| Ti | 6.494400000 | 3.247194072 | 8.872200000  |
| Ti | 6.494400000 | 3.247194072 | 5.914800000  |

|    |              |             |              |
|----|--------------|-------------|--------------|
| Ti | 0.000000000  | 6.494391717 | 4.436100000  |
| Ti | 0.000000000  | 6.494391717 | 1.478700000  |
| Ti | 3.247200000  | 6.494391717 | 2.957400000  |
| Ti | 3.247200000  | 6.494391717 | 0.000000000  |
| Ti | 0.000000000  | 6.494391717 | 10.350900000 |
| Ti | 0.000000000  | 6.494391717 | 7.393500000  |
| Ti | 3.247200000  | 6.494391717 | 8.872200000  |
| Ti | 3.247200000  | 6.494391717 | 5.914800000  |
| Ti | 6.494400000  | 6.494391717 | 4.436100000  |
| Ti | 6.494400000  | 6.494391717 | 1.478700000  |
| Ti | 9.741600000  | 6.494391717 | 2.957400000  |
| Ti | 9.741600000  | 6.494391717 | 0.000000000  |
| Ti | 6.494400000  | 6.494391717 | 10.350900000 |
| Ti | 6.494400000  | 6.494391717 | 7.393500000  |
| Ti | 9.741600000  | 6.494391717 | 8.872200000  |
| Ti | 9.741600000  | 6.494391717 | 5.914800000  |
| Ti | 3.240380880  | 9.727491082 | 1.482177902  |
| Ti | 3.240980573  | 9.751126327 | 4.436230126  |
| Ti | -0.013106089 | 9.729884253 | 2.972222489  |
| Ti | -0.016597998 | 9.762681415 | 0.010658470  |
| Ti | 3.242469869  | 9.746072092 | 7.382912508  |
| Ti | 3.240936281  | 9.731670202 | 10.338727342 |



|    |              |              |              |
|----|--------------|--------------|--------------|
| Ti | -0.014800738 | 9.753248034  | 8.885886847  |
| Ti | -0.014664745 | 9.767346313  | 5.931917431  |
| Ti | 9.720409552  | 9.737631698  | 1.476215784  |
| Ti | 9.720860913  | 9.736527982  | 4.432681246  |
| Ti | 6.481009197  | 9.834640860  | 2.972411762  |
| Ti | 6.478096848  | 9.833040650  | 0.016147404  |
| Ti | 9.718505654  | 9.734734890  | 7.391169569  |
| Ti | 9.717539157  | 9.736842309  | 10.349066412 |
| Ti | 6.478334153  | 9.836737564  | 8.887140785  |
| Ti | 6.479886315  | 9.834655148  | 5.928676121  |
| Ti | -0.027595355 | 13.013815290 | 1.490363986  |
| Ti | -0.034640610 | 13.019023116 | 4.484033539  |
| Ti | 3.224371015  | 13.006278587 | 2.994012612  |
| Ti | 3.208160863  | 13.014476091 | 5.945627938  |
| Ti | 6.463370796  | 13.169110674 | 1.511065786  |
| Ti | 6.465612403  | 13.168028389 | 4.469956315  |
| Ti | 9.705850276  | 12.996523735 | 2.984217703  |
| Ti | 9.712818768  | 12.991369487 | 5.943616906  |
| Ti | -0.038825861 | 13.119321996 | 7.474899478  |
| Ti | -0.029781500 | 13.114610663 | 10.335296758 |
| Ti | 3.220723890  | 13.003935422 | 8.897243263  |
| Ti | 3.212550168  | 12.968398615 | 0.030709642  |

|    |              |              |              |
|----|--------------|--------------|--------------|
| Ti | 6.462609652  | 13.173493392 | 7.424883929  |
| Ti | 6.460022283  | 13.168971370 | 10.384058369 |
| Ti | 9.697982051  | 12.992305324 | 8.903288189  |
| Ti | 9.716653321  | 12.994048410 | 0.029349238  |
| Ti | 9.692429209  | 16.321899497 | 1.498242499  |
| Ti | 9.691757039  | 16.313001901 | 4.459510778  |
| Ti | 6.444532100  | 16.620452970 | 2.984714546  |
| Ti | -0.053661279 | 16.308579892 | 5.965951190  |
| Ti | 3.210085413  | 16.254397780 | 1.526113037  |
| Ti | 3.202101717  | 16.372138234 | 4.508059457  |
| Ti | -0.046070105 | 16.295513891 | 2.978563154  |
| Ti | 6.446247661  | 16.636840836 | 5.935844858  |
| Ti | 3.203216936  | 16.364240769 | 7.381173557  |
| Ti | 3.212240515  | 16.260398568 | 10.356601867 |
| Ti | -0.065658904 | 16.683029041 | 8.902164377  |
| Ti | 6.446606801  | 16.627021690 | 0.031620521  |
| Ti | 9.672094463  | 16.313630555 | 7.419761712  |
| Ti | 9.670431247  | 16.313359091 | 10.373305262 |
| Ti | 6.430155187  | 16.629632747 | 8.897136797  |
| Ti | -0.040726642 | 16.306376031 | 0.000189274  |
| Ti | 6.426635092  | 19.999235743 | 7.405282282  |
| Ti | 3.181601754  | 19.513250526 | 0.025563766  |

|    |              |              |              |
|----|--------------|--------------|--------------|
| Ti | 3.201321220  | 19.523126822 | 8.904388342  |
| Ti | 3.197768004  | 19.511782476 | 2.973429108  |
| Ti | 6.440629745  | 19.990388153 | 1.492658928  |
| Ti | 6.437764676  | 19.995996032 | 4.447657519  |
| Ti | 6.428973466  | 19.993992198 | 10.368100238 |
| Ti | 3.136923529  | 19.721631448 | 5.939275442  |
| Ti | -0.048482385 | 19.556981266 | 1.303598261  |
| Ti | -0.071686226 | 19.508582056 | 4.636800994  |
| Ti | 9.726140860  | 19.566789696 | 2.978823406  |
| Ti | 9.688257077  | 19.574930050 | 5.931278633  |
| Ti | -0.076169570 | 20.002414732 | 7.506945864  |
| Ti | 9.684001166  | 19.570493754 | 8.894001953  |
| Ti | 9.696434306  | 19.571936800 | 0.023611882  |
| Ti | -0.055185515 | 20.072259614 | 10.379220062 |
| O  | 0.000000000  | 1.266694833  | 2.957400000  |
| O  | 0.000000000  | 1.266694833  | 0.000000000  |
| O  | 0.000000000  | 1.266694833  | 8.872200000  |
| O  | 0.000000000  | 1.266694833  | 5.914800000  |
| O  | 6.494400000  | 1.266694833  | 2.957400000  |
| O  | 6.494400000  | 1.266694833  | 0.000000000  |
| O  | 6.494400000  | 1.266694833  | 8.872200000  |
| O  | 6.494400000  | 1.266694833  | 5.914800000  |

|   |              |             |              |
|---|--------------|-------------|--------------|
| O | 9.741600000  | 1.980495667 | 8.872200000  |
| O | 9.741600000  | 1.980495667 | 5.914800000  |
| O | 9.741600000  | 1.980495667 | 2.957400000  |
| O | 9.741600000  | 1.980495667 | 0.000000000  |
| O | 3.247200000  | 1.980495667 | 8.872200000  |
| O | 3.247200000  | 1.980495667 | 5.914800000  |
| O | 3.247200000  | 1.980495667 | 2.957400000  |
| O | 3.247200000  | 1.980495667 | 0.000000000  |
| O | 1.266698949  | 3.247194072 | 1.478700000  |
| O | 1.266698949  | 3.247194072 | 4.436100000  |
| O | 5.227599738  | 3.247194072 | 1.478700000  |
| O | 5.227599738  | 3.247194072 | 4.436100000  |
| O | 1.266698949  | 3.247194072 | 7.393500000  |
| O | 1.266698949  | 3.247194072 | 10.350900000 |
| O | 5.227599738  | 3.247194072 | 7.393500000  |
| O | 5.227599738  | 3.247194072 | 10.350900000 |
| O | 7.761098949  | 3.247194072 | 1.478700000  |
| O | 7.761098949  | 3.247194072 | 4.436100000  |
| O | 11.721999738 | 3.247194072 | 1.478700000  |
| O | 11.721999738 | 3.247194072 | 4.436100000  |
| O | 7.761098949  | 3.247194072 | 7.393500000  |
| O | 7.761098949  | 3.247194072 | 10.350900000 |

|   |              |             |              |
|---|--------------|-------------|--------------|
| O | 11.721999738 | 3.247194072 | 7.393500000  |
| O | 11.721999738 | 3.247194072 | 10.350900000 |
| O | 9.741600000  | 4.513896049 | 8.872200000  |
| O | 9.741600000  | 4.513896049 | 5.914800000  |
| O | 9.741600000  | 4.513896049 | 2.957400000  |
| O | 9.741600000  | 4.513896049 | 0.000000000  |
| O | 3.247200000  | 4.513896049 | 8.872200000  |
| O | 3.247200000  | 4.513896049 | 5.914800000  |
| O | 3.247200000  | 4.513896049 | 2.957400000  |
| O | 3.247200000  | 4.513896049 | 0.000000000  |
| O | 0.000000000  | 5.227596870 | 2.957400000  |
| O | 0.000000000  | 5.227596870 | 0.000000000  |
| O | 0.000000000  | 5.227596870 | 8.872200000  |
| O | 0.000000000  | 5.227596870 | 5.914800000  |
| O | 6.494400000  | 5.227596870 | 0.000000000  |
| O | 6.494400000  | 5.227596870 | 2.957400000  |
| O | 6.494400000  | 5.227596870 | 8.872200000  |
| O | 6.494400000  | 5.227596870 | 5.914800000  |
| O | 8.474899752  | 6.494391717 | 7.393500000  |
| O | 11.008298949 | 6.494391717 | 7.393500000  |
| O | 8.474899752  | 6.494391717 | 10.350900000 |
| O | 11.008298949 | 6.494391717 | 10.350900000 |

|   |              |             |              |
|---|--------------|-------------|--------------|
| O | 8.474899752  | 6.494391717 | 1.478700000  |
| O | 11.008298949 | 6.494391717 | 1.478700000  |
| O | 8.474899752  | 6.494391717 | 4.436100000  |
| O | 11.008298949 | 6.494391717 | 4.436100000  |
| O | 1.980499752  | 6.494391717 | 1.478700000  |
| O | 4.513898949  | 6.494391717 | 1.478700000  |
| O | 1.980499752  | 6.494391717 | 4.436100000  |
| O | 4.513898949  | 6.494391717 | 4.436100000  |
| O | 1.980499752  | 6.494391717 | 7.393500000  |
| O | 4.513898949  | 6.494391717 | 7.393500000  |
| O | 1.980499752  | 6.494391717 | 10.350900000 |
| O | 4.513898949  | 6.494391717 | 10.350900000 |
| O | 0.000000000  | 7.761086550 | 8.872200000  |
| O | 0.000000000  | 7.761086550 | 5.914800000  |
| O | 6.494400000  | 7.761086550 | 2.957400000  |
| O | 6.494400000  | 7.761086550 | 0.000000000  |
| O | 0.000000000  | 7.761086550 | 2.957400000  |
| O | 0.000000000  | 7.761086550 | 0.000000000  |
| O | 6.494400000  | 7.761086550 | 8.872200000  |
| O | 6.494400000  | 7.761086550 | 5.914800000  |
| O | 3.247200000  | 8.474887384 | 2.957400000  |
| O | 3.247200000  | 8.474887384 | 0.000000000  |

|   |              |             |              |
|---|--------------|-------------|--------------|
| O | 3.247200000  | 8.474887384 | 8.872200000  |
| O | 3.247200000  | 8.474887384 | 5.914800000  |
| O | 9.741600000  | 8.474887384 | 2.957400000  |
| O | 9.741600000  | 8.474887384 | 0.000000000  |
| O | 9.741600000  | 8.474887384 | 8.872200000  |
| O | 9.741600000  | 8.474887384 | 5.914800000  |
| O | 1.260158049  | 9.777247613 | 1.489630550  |
| O | 1.260820348  | 9.777351198 | 4.443623626  |
| O | 5.204689573  | 9.777569083 | 1.489181026  |
| O | 5.204992212  | 9.778737094 | 4.445812102  |
| O | 1.260981020  | 9.780290869 | 7.403626138  |
| O | 1.260609020  | 9.778401335 | 10.361097115 |
| O | 5.204167943  | 9.780105130 | 7.403046487  |
| O | 5.203780747  | 9.778347757 | 10.361440174 |
| O | 7.762455110  | 9.781633903 | 1.488696012  |
| O | 7.762740474  | 9.780576621 | 4.446214308  |
| O | 11.702496406 | 9.769132262 | 1.490825340  |
| O | 11.702750077 | 9.766971264 | 4.443694603  |
| O | 7.762198581  | 9.781644618 | 7.403460523  |
| O | 7.761836713  | 9.782330423 | 10.361274559 |
| O | 11.702757610 | 9.769918079 | 7.403614308  |
| O | 11.702226758 | 9.769946654 | 10.359417312 |

|   |              |              |             |
|---|--------------|--------------|-------------|
| O | 9.735261206  | 11.070903127 | 2.966875510 |
| O | 9.734657746  | 11.069235051 | 0.009712102 |
| O | 3.223961998  | 11.068427803 | 2.964131042 |
| O | 3.224236321  | 11.060644638 | 0.010220774 |
| O | 3.223287489  | 11.068049181 | 8.882763833 |
| O | 3.223504142  | 11.069967290 | 5.921672998 |
| O | 9.733303924  | 11.069763692 | 8.880421572 |
| O | 9.734582801  | 11.069385071 | 5.922063374 |
| O | 6.468346935  | 11.791236962 | 8.888962543 |
| O | -0.036590489 | 11.790383278 | 2.981023711 |
| O | 6.466623971  | 11.791322687 | 0.017744400 |
| O | 6.469726086  | 11.791140520 | 5.930616175 |
| O | -0.035989757 | 11.788647336 | 0.024167873 |
| O | -0.038232403 | 11.787064985 | 5.931053870 |
| O | 6.469066255  | 11.791104801 | 2.974694875 |
| O | -0.036333310 | 11.790361847 | 8.895386016 |
| O | 8.453065969  | 13.094811636 | 1.502501155 |
| O | 8.453201052  | 13.097672725 | 4.457665361 |
| O | 10.987907962 | 13.107859777 | 1.502962510 |
| O | 10.986258774 | 13.111938884 | 4.457854634 |
| O | 1.937109367  | 13.084338832 | 1.505032690 |
| O | 1.935418095  | 13.082817204 | 4.458020249 |



|   |              |              |              |
|---|--------------|--------------|--------------|
| O | 4.473924229  | 13.102487643 | 1.502193586  |
| O | 4.475047240  | 13.098404964 | 4.461521810  |
| O | 1.938291997  | 13.080152569 | 7.412261746  |
| O | 1.940749997  | 13.083331557 | 10.377918806 |
| O | 4.473710563  | 13.095036665 | 7.413125306  |
| O | 4.473125807  | 13.098158503 | 10.374677496 |
| O | 8.450955419  | 13.093361445 | 7.414828769  |
| O | 8.450829817  | 13.091693369 | 10.376085218 |
| O | 10.980811271 | 13.107134682 | 7.413480194  |
| O | 10.981828684 | 13.107420433 | 10.376936950 |
| O | -0.031610972 | 14.408287609 | 2.978125459  |
| O | -0.027936051 | 14.395689527 | 5.933005754  |
| O | -0.031998039 | 14.376111957 | 8.898520860  |
| O | -0.026803038 | 14.396028857 | 0.031703328  |
| O | 6.463074521  | 14.399311431 | 2.982017398  |
| O | 6.462679402  | 14.398664918 | 5.938802258  |
| O | 6.459726658  | 14.399854359 | 8.894912832  |
| O | 6.467011946  | 14.397271878 | 0.022984913  |
| O | 9.680874373  | 15.109604662 | 8.895563460  |
| O | 3.199169496  | 15.095259922 | 8.878611643  |
| O | 9.691449334  | 15.113608759 | 5.939772286  |
| O | 9.701736723  | 15.115744753 | 2.977687764  |

|   |              |              |              |
|---|--------------|--------------|--------------|
| O | 3.186387218  | 15.095956442 | 3.003511781  |
| O | 9.692000838  | 15.112269297 | 0.025185218  |
| O | 3.188215002  | 15.086105149 | 0.023931281  |
| O | 3.183724384  | 15.103185962 | 5.940493891  |
| O | 1.230929612  | 16.440193596 | 10.353218602 |
| O | 5.166984905  | 16.445404994 | 4.464479210  |
| O | 5.164072557  | 16.451498651 | 7.411149763  |
| O | 7.738886672  | 16.466532767 | 1.506499560  |
| O | 7.736835871  | 16.465811244 | 4.459771030  |
| O | 5.165639266  | 16.434942907 | 10.382390395 |
| O | 11.667475354 | 16.445730037 | 1.491203887  |
| O | 11.661531679 | 16.431956800 | 4.462373542  |
| O | 1.218868083  | 16.471247672 | 4.457830975  |
| O | 1.231470466  | 16.459871179 | 1.500915989  |
| O | 5.167949324  | 16.428088435 | 1.500466464  |
| O | 7.731283548  | 16.473322944 | 7.420152089  |
| O | 7.731954550  | 16.470897626 | 10.369638086 |
| O | 1.221003182  | 16.453531061 | 7.440451682  |
| O | 11.655256270 | 16.407671470 | 7.434891770  |
| O | 11.658853258 | 16.413793702 | 10.367993772 |
| O | 3.224701060  | 17.701112671 | 8.918075189  |
| O | 3.190550907  | 17.698119421 | 0.024593738  |

|   |              |              |              |
|---|--------------|--------------|--------------|
| O | 9.717881152  | 17.742246641 | 2.986370690  |
| O | 9.715520438  | 17.746693654 | 5.936826715  |
| O | 3.238707663  | 17.692711568 | 2.960830584  |
| O | 3.167157299  | 17.752555137 | 5.938471030  |
| O | 9.722912104  | 17.743207482 | 8.894309522  |
| O | 9.716041678  | 17.743343214 | 0.021080347  |
| O | 6.446387940  | 18.495691965 | 0.032271149  |
| O | 6.427856170  | 18.505750428 | 5.932982095  |
| O | -0.068116255 | 18.433126610 | -0.096044522 |
| O | 6.425216715  | 18.496945701 | 2.987139614  |
| O | -0.131503807 | 18.403615593 | 6.043092012  |
| O | 6.413225975  | 18.498995970 | 8.889175476  |
| O | -0.120451247 | 18.559950399 | 8.907464038  |
| O | -0.121099648 | 18.585585907 | 2.972683843  |
| O | 1.871590482  | 19.718752499 | 4.351033346  |
| O | 4.401992514  | 19.922582825 | 1.481716548  |
| O | 4.375650188  | 19.966117110 | 4.462539156  |
| O | 1.906628420  | 19.762722556 | 7.504816536  |
| O | 1.956509309  | 19.908898886 | 10.367674373 |
| O | 4.384319693  | 19.965524175 | 7.403578819  |
| O | 4.415345780  | 19.905459148 | 10.398963665 |
| O | 8.488747891  | 19.938799239 | 1.511326037  |

|   |              |              |              |
|---|--------------|--------------|--------------|
| O | 8.486926991  | 19.946610978 | 4.450555771  |
| O | 10.964971040 | 19.941863927 | 1.509870996  |
| O | 10.982358107 | 19.987130583 | 4.459771030  |
| O | 8.462461417  | 19.920561131 | 7.407127699  |
| O | 8.462326723  | 19.907863035 | 10.370679091 |
| O | 10.925328053 | 20.012330319 | 7.401011796  |
| O | 10.914372780 | 19.993267102 | 10.368254023 |
| O | 1.918548372  | 19.865807515 | 1.524480552  |
| O | 6.434140541  | 21.102744871 | 2.973381790  |
| O | 6.436837015  | 21.104920157 | 5.927919026  |
| O | -0.035057161 | 21.020544796 | 0.119478960  |
| O | 0.194910712  | 21.027420699 | 5.862903545  |
| O | -0.024850692 | 21.192535228 | 8.891328463  |
| O | 6.435883118  | 21.102673433 | 8.890961746  |
| O | 6.450346536  | 21.102694865 | 0.021541702  |
| H | 0.000000000  | 0.932897449  | 9.814799089  |
| H | 0.816399334  | 0.932897449  | 8.400899272  |
| H | 6.457698847  | 0.932897449  | 6.856699960  |
| H | 0.834099172  | 0.932897449  | -0.439201108 |
| H | 0.000000000  | 0.932897449  | 3.899999089  |
| H | 0.816399334  | 0.932897449  | 2.486099272  |
| H | 6.457698847  | 0.932897449  | 0.941899960  |

|   |              |              |              |
|---|--------------|--------------|--------------|
| H | 0.834099172  | 0.932897449  | 5.475598892  |
| H | 6.494400000  | 0.932897449  | 9.814799089  |
| H | 7.310799334  | 0.932897449  | 8.400899272  |
| H | -0.036701153 | 0.932897449  | 6.856699960  |
| H | 7.328499172  | 0.932897449  | -0.439201108 |
| H | 6.494400000  | 0.932897449  | 3.899999089  |
| H | 7.310799334  | 0.932897449  | 2.486099272  |
| H | -0.036701153 | 0.932897449  | 0.941899960  |
| H | 7.328499172  | 0.932897449  | 5.475598892  |
| H | 2.394293565  | 21.485216502 | 5.879618770  |
| H | 1.368383978  | 21.345794630 | 5.858585741  |

TS7-E2:

|    |             |             |              |
|----|-------------|-------------|--------------|
| Ti | 3.247200000 | 3.247190143 | 1.478700000  |
| Ti | 3.247200000 | 3.247190143 | 4.436100000  |
| Ti | 0.000000000 | 3.247190143 | 2.957400000  |
| Ti | 0.000000000 | 3.247190143 | 0.000000000  |
| Ti | 3.247200000 | 3.247190143 | 7.393500000  |
| Ti | 3.247200000 | 3.247190143 | 10.350900000 |
| Ti | 0.000000000 | 3.247190143 | 8.872200000  |
| Ti | 0.000000000 | 3.247190143 | 5.914800000  |
| Ti | 9.741600000 | 3.247190143 | 1.478700000  |
| Ti | 9.741600000 | 3.247190143 | 4.436100000  |

|    |             |             |              |
|----|-------------|-------------|--------------|
| Ti | 6.494400000 | 3.247190143 | 2.957400000  |
| Ti | 6.494400000 | 3.247190143 | 0.000000000  |
| Ti | 9.741600000 | 3.247190143 | 7.393500000  |
| Ti | 9.741600000 | 3.247190143 | 10.350900000 |
| Ti | 6.494400000 | 3.247190143 | 8.872200000  |
| Ti | 6.494400000 | 3.247190143 | 5.914800000  |
| Ti | 0.000000000 | 6.494389931 | 4.436100000  |
| Ti | 0.000000000 | 6.494389931 | 1.478700000  |
| Ti | 3.247200000 | 6.494389931 | 2.957400000  |
| Ti | 3.247200000 | 6.494389931 | 0.000000000  |
| Ti | 0.000000000 | 6.494389931 | 10.350900000 |
| Ti | 0.000000000 | 6.494389931 | 7.393500000  |
| Ti | 3.247200000 | 6.494389931 | 8.872200000  |
| Ti | 3.247200000 | 6.494389931 | 5.914800000  |
| Ti | 6.494400000 | 6.494389931 | 4.436100000  |
| Ti | 6.494400000 | 6.494389931 | 1.478700000  |
| Ti | 9.741600000 | 6.494389931 | 2.957400000  |
| Ti | 9.741600000 | 6.494389931 | 0.000000000  |
| Ti | 6.494400000 | 6.494389931 | 10.350900000 |
| Ti | 6.494400000 | 6.494389931 | 7.393500000  |
| Ti | 9.741600000 | 6.494389931 | 8.872200000  |
| Ti | 9.741600000 | 6.494389931 | 5.914800000  |

|    |              |              |              |
|----|--------------|--------------|--------------|
| Ti | 3.225486363  | 9.734473070  | 1.478908083  |
| Ti | 3.225377127  | 9.736863740  | 4.437600940  |
| Ti | -0.014798659 | 9.838601737  | 2.962520087  |
| Ti | -0.010387273 | 9.838967142  | 0.002434768  |
| Ti | 3.228077499  | 9.738705411  | 7.393877719  |
| Ti | 3.229496266  | 9.737530614  | 10.350208205 |
| Ti | -0.011353250 | 9.839072513  | 8.874235756  |
| Ti | -0.015709304 | 9.839167168  | 5.918953491  |
| Ti | 9.741635459  | 9.737932452  | 1.482686575  |
| Ti | 9.734329519  | 9.738617542  | 4.439098922  |
| Ti | 6.481213251  | 9.776295345  | 2.961565794  |
| Ti | 6.484228601  | 9.784764671  | 0.011954402  |
| Ti | 9.735404213  | 9.737543473  | 7.395513161  |
| Ti | 9.741929916  | 9.735593931  | 10.355462440 |
| Ti | 6.484682559  | 9.759725313  | 8.885477306  |
| Ti | 6.477386101  | 9.748534558  | 5.921841569  |
| Ti | -0.036044440 | 13.176930271 | 1.510044891  |
| Ti | -0.035553463 | 13.178500120 | 4.466813309  |
| Ti | 3.210600029  | 12.989559606 | 2.957873539  |
| Ti | 3.210153475  | 12.995176058 | 5.915403191  |
| Ti | 6.458870566  | 13.189027931 | 1.469556074  |
| Ti | 6.457019403  | 13.059441636 | 4.398857225  |

|    |              |              |              |
|----|--------------|--------------|--------------|
| Ti | 9.706713122  | 12.995385371 | 2.958793882  |
| Ti | 9.705884047  | 12.995440021 | 5.915607607  |
| Ti | -0.036886633 | 13.177893969 | 7.424111574  |
| Ti | -0.035748035 | 13.178456186 | 10.381397655 |
| Ti | 3.209826806  | 12.994382739 | 8.873277795  |
| Ti | 3.209268548  | 12.990148255 | 0.001675545  |
| Ti | 6.456987710  | 13.015644816 | 7.410554616  |
| Ti | 6.456661951  | 13.106321718 | 10.408834401 |
| Ti | 9.705770655  | 12.989949658 | 8.874574910  |
| Ti | 9.707772359  | 12.995716843 | 0.002256141  |
| Ti | 9.696055552  | 16.325195287 | 1.493441338  |
| Ti | 9.698063621  | 16.321185832 | 4.446798809  |
| Ti | 6.449403420  | 16.471974910 | 2.951744387  |
| Ti | -0.057334512 | 16.650052927 | 5.924854214  |
| Ti | 3.178528994  | 16.309709683 | 1.484327104  |
| Ti | 3.177950213  | 16.314105617 | 4.444218536  |
| Ti | -0.052005597 | 16.651787083 | 2.963959158  |
| Ti | 6.440481933  | 16.295414235 | 5.919082670  |
| Ti | 3.182139361  | 16.312249659 | 7.402597672  |
| Ti | 3.176064109  | 16.313924165 | 10.357946893 |
| Ti | -0.055083552 | 16.651182718 | 8.877701592  |
| Ti | 6.443343495  | 16.624428135 | 0.004138467  |



|    |              |              |              |
|----|--------------|--------------|--------------|
| Ti | 9.689762479  | 16.304443635 | 7.401665263  |
| Ti | 9.698525892  | 16.311549210 | 10.361584022 |
| Ti | 6.435582038  | 16.316710959 | 8.891854880  |
| Ti | -0.055714029 | 16.646619619 | 0.006287787  |
| Ti | 6.234475148  | 19.652342354 | 4.332990249  |
| Ti | 6.447490949  | 19.969376109 | 10.505737871 |
| Ti | 3.123632610  | 19.561273615 | 2.950375465  |
| Ti | 3.141054228  | 19.558016402 | 5.953524550  |
| Ti | 3.224048633  | 19.569388966 | 8.892016473  |
| Ti | 6.434997931  | 19.569911891 | 7.512527069  |
| Ti | 9.604482694  | 19.588100350 | 3.010925273  |
| Ti | 3.203682974  | 19.560620315 | 0.012569778  |
| Ti | -0.088409306 | 20.020862153 | 4.453291603  |
| Ti | -0.095860591 | 20.011199456 | 1.499389970  |
| Ti | 9.663731884  | 19.560225620 | 8.885931800  |
| Ti | 9.734892454  | 19.538103788 | 5.943705982  |
| Ti | -0.067357319 | 20.024802313 | 7.418719879  |
| Ti | -0.046280783 | 20.010611165 | 10.368710527 |
| Ti | 9.705867422  | 19.570712711 | 0.027675349  |
| Ti | 6.442365568  | 20.058918934 | 1.542810754  |
| O  | 0.000000000  | 1.266689833  | 2.957400000  |
| O  | 0.000000000  | 1.266689833  | 0.000000000  |

|   |             |             |              |
|---|-------------|-------------|--------------|
| O | 0.000000000 | 1.266689833 | 8.872200000  |
| O | 0.000000000 | 1.266689833 | 5.914800000  |
| O | 6.494400000 | 1.266689833 | 2.957400000  |
| O | 6.494400000 | 1.266689833 | 0.000000000  |
| O | 6.494400000 | 1.266689833 | 8.872200000  |
| O | 6.494400000 | 1.266689833 | 5.914800000  |
| O | 9.741600000 | 1.980499953 | 8.872200000  |
| O | 9.741600000 | 1.980499953 | 5.914800000  |
| O | 9.741600000 | 1.980499953 | 2.957400000  |
| O | 9.741600000 | 1.980499953 | 0.000000000  |
| O | 3.247200000 | 1.980499953 | 8.872200000  |
| O | 3.247200000 | 1.980499953 | 5.914800000  |
| O | 3.247200000 | 1.980499953 | 2.957400000  |
| O | 3.247200000 | 1.980499953 | 0.000000000  |
| O | 1.266699988 | 3.247190143 | 1.478700000  |
| O | 1.266699988 | 3.247190143 | 4.436100000  |
| O | 5.227599998 | 3.247190143 | 1.478700000  |
| O | 5.227599998 | 3.247190143 | 4.436100000  |
| O | 1.266699988 | 3.247190143 | 7.393500000  |
| O | 1.266699988 | 3.247190143 | 10.350900000 |
| O | 5.227599998 | 3.247190143 | 7.393500000  |
| O | 5.227599998 | 3.247190143 | 10.350900000 |

|   |              |             |              |
|---|--------------|-------------|--------------|
| O | 7.761099988  | 3.247190143 | 1.478700000  |
| O | 7.761099988  | 3.247190143 | 4.436100000  |
| O | 11.721999998 | 3.247190143 | 1.478700000  |
| O | 11.721999998 | 3.247190143 | 4.436100000  |
| O | 7.761099988  | 3.247190143 | 7.393500000  |
| O | 7.761099988  | 3.247190143 | 10.350900000 |
| O | 11.721999998 | 3.247190143 | 7.393500000  |
| O | 11.721999998 | 3.247190143 | 10.350900000 |
| O | 9.741600000  | 4.513899978 | 8.872200000  |
| O | 9.741600000  | 4.513899978 | 5.914800000  |
| O | 9.741600000  | 4.513899978 | 2.957400000  |
| O | 9.741600000  | 4.513899978 | 0.000000000  |
| O | 3.247200000  | 4.513899978 | 8.872200000  |
| O | 3.247200000  | 4.513899978 | 5.914800000  |
| O | 3.247200000  | 4.513899978 | 2.957400000  |
| O | 3.247200000  | 4.513899978 | 0.000000000  |
| O | 0.000000000  | 5.227600085 | 2.957400000  |
| O | 0.000000000  | 5.227600085 | 0.000000000  |
| O | 0.000000000  | 5.227600085 | 8.872200000  |
| O | 0.000000000  | 5.227600085 | 5.914800000  |
| O | 6.494400000  | 5.227600085 | 0.000000000  |
| O | 6.494400000  | 5.227600085 | 2.957400000  |

|   |              |             |              |
|---|--------------|-------------|--------------|
| O | 6.494400000  | 5.227600085 | 8.872200000  |
| O | 6.494400000  | 5.227600085 | 5.914800000  |
| O | 8.474900012  | 6.494389931 | 7.393500000  |
| O | 11.008299988 | 6.494389931 | 7.393500000  |
| O | 8.474900012  | 6.494389931 | 10.350900000 |
| O | 11.008299988 | 6.494389931 | 10.350900000 |
| O | 8.474900012  | 6.494389931 | 1.478700000  |
| O | 11.008299988 | 6.494389931 | 1.478700000  |
| O | 8.474900012  | 6.494389931 | 4.436100000  |
| O | 11.008299988 | 6.494389931 | 4.436100000  |
| O | 1.980500012  | 6.494389931 | 1.478700000  |
| O | 4.513899988  | 6.494389931 | 1.478700000  |
| O | 1.980500012  | 6.494389931 | 4.436100000  |
| O | 4.513899988  | 6.494389931 | 4.436100000  |
| O | 1.980500012  | 6.494389931 | 7.393500000  |
| O | 4.513899988  | 6.494389931 | 7.393500000  |
| O | 1.980500012  | 6.494389931 | 10.350900000 |
| O | 4.513899988  | 6.494389931 | 10.350900000 |
| O | 0.000000000  | 7.761090122 | 8.872200000  |
| O | 0.000000000  | 7.761090122 | 5.914800000  |
| O | 6.494400000  | 7.761090122 | 2.957400000  |
| O | 6.494400000  | 7.761090122 | 0.000000000  |

|   |             |             |              |
|---|-------------|-------------|--------------|
| O | 0.000000000 | 7.761090122 | 2.957400000  |
| O | 0.000000000 | 7.761090122 | 0.000000000  |
| O | 6.494400000 | 7.761090122 | 8.872200000  |
| O | 6.494400000 | 7.761090122 | 5.914800000  |
| O | 3.247200000 | 8.474889884 | 2.957400000  |
| O | 3.247200000 | 8.474889884 | 0.000000000  |
| O | 3.247200000 | 8.474889884 | 8.872200000  |
| O | 3.247200000 | 8.474889884 | 5.914800000  |
| O | 9.741600000 | 8.474889884 | 2.957400000  |
| O | 9.741600000 | 8.474889884 | 0.000000000  |
| O | 9.741600000 | 8.474889884 | 8.872200000  |
| O | 9.741600000 | 8.474889884 | 5.914800000  |
| O | 1.269461407 | 9.785679076 | 1.481103183  |
| O | 1.268562192 | 9.785426900 | 4.437839306  |
| O | 5.210862111 | 9.776475725 | 1.482743949  |
| O | 5.210038231 | 9.774949811 | 4.439734526  |
| O | 1.269039531 | 9.785043993 | 7.394259105  |
| O | 1.270224889 | 9.786054840 | 10.352724243 |
| O | 5.210652731 | 9.773178507 | 7.397382830  |
| O | 5.211634555 | 9.776062100 | 10.355576123 |
| O | 7.759042692 | 9.784403909 | 1.483449230  |
| O | 7.757495856 | 9.783212681 | 4.440503095  |

|   |              |              |              |
|---|--------------|--------------|--------------|
| O | 11.699906179 | 9.777323694  | 1.480217974  |
| O | 11.698792779 | 9.777479071  | 4.437733313  |
| O | 7.757879545  | 9.781341364  | 7.395687766  |
| O | 7.759375595  | 9.783794543  | 10.355400216 |
| O | 11.699536518 | 9.777172603  | 7.395886149  |
| O | 11.700619004 | 9.777233682  | 10.352732760 |
| O | 9.722433986  | 11.072008987 | 2.959416237  |
| O | 9.723165256  | 11.071846108 | 0.002297427  |
| O | 3.240872896  | 11.069595813 | 2.959270970  |
| O | 3.242096051  | 11.069532948 | 0.002273886  |
| O | 3.240680142  | 11.069726902 | 8.872852757  |
| O | 3.241279575  | 11.070314122 | 5.916151295  |
| O | 9.722456327  | 11.069442221 | 8.874100662  |
| O | 9.722640638  | 11.070346983 | 5.917024911  |
| O | 6.462912681  | 11.795640754 | 8.878446502  |
| O | -0.031609024 | 11.794041615 | 2.958457330  |
| O | 6.463479382  | 11.808699254 | 0.009984774  |
| O | 6.462963077  | 11.798947974 | 5.916337966  |
| O | -0.031195721 | 11.793738004 | 0.001658747  |
| O | -0.031895687 | 11.794319152 | 5.914948935  |
| O | 6.462571335  | 11.806496465 | 2.958467976  |
| O | -0.031288850 | 11.793801227 | 8.872652246  |

|   |              |              |              |
|---|--------------|--------------|--------------|
| O | 8.435048425  | 13.102688384 | 1.483976830  |
| O | 8.432335195  | 13.097188733 | 4.442162788  |
| O | 10.964829592 | 13.110864814 | 1.483915907  |
| O | 10.964238472 | 13.112070687 | 4.439354323  |
| O | 1.954607099  | 13.094138333 | 1.482881054  |
| O | 1.954632427  | 13.097020140 | 4.439950890  |
| O | 4.484079132  | 13.114091666 | 1.484263461  |
| O | 4.486282163  | 13.109066007 | 4.441450410  |
| O | 1.954074298  | 13.095758188 | 7.395743010  |
| O | 1.954007146  | 13.092136284 | 10.355395958 |
| O | 4.487394134  | 13.109200310 | 7.397501007  |
| O | 4.484168105  | 13.108560940 | 10.351012263 |
| O | 8.430383887  | 13.095868560 | 7.397130149  |
| O | 8.434171941  | 13.096881550 | 10.353758978 |
| O | 10.963881020 | 13.111775648 | 7.397873285  |
| O | 10.964813616 | 13.110281166 | 10.354820921 |
| O | -0.034405902 | 14.405253997 | 2.967226730  |
| O | -0.037009767 | 14.405324006 | 5.925012257  |
| O | -0.033757891 | 14.403831310 | 8.883650343  |
| O | -0.036068079 | 14.405441521 | 0.011361739  |
| O | 6.456728324  | 14.423142773 | 2.972578323  |
| O | 6.450987014  | 14.410566123 | 5.922550754  |

|   |              |              |              |
|---|--------------|--------------|--------------|
| O | 6.456224228  | 14.407074236 | 8.873256738  |
| O | 6.453133543  | 14.412074535 | -0.003249000 |
| O | 9.684408106  | 15.109441426 | 8.887174381  |
| O | 3.192101900  | 15.110185809 | 8.882930630  |
| O | 9.687751423  | 15.106147779 | 5.921413101  |
| O | 9.685745302  | 15.119754565 | 2.965804813  |
| O | 3.201605156  | 15.113890939 | 2.966557885  |
| O | 9.697588490  | 15.119511676 | 0.014582230  |
| O | 3.194111397  | 15.110702663 | 0.006599142  |
| O | 3.200674768  | 15.111261308 | 5.920618744  |
| O | 1.232732847  | 16.471529852 | 10.360244083 |
| O | 5.160577141  | 16.483494994 | 4.443383248  |
| O | 5.159116290  | 16.443158271 | 7.404104882  |
| O | 7.726096471  | 16.435166507 | 1.457447414  |
| O | 7.720941736  | 16.452167310 | 4.451537155  |
| O | 5.159688317  | 16.450211696 | 10.364427148 |
| O | 11.647910584 | 16.479539117 | 1.493052499  |
| O | 11.648933712 | 16.471810960 | 4.442590310  |
| O | 1.231720760  | 16.469934999 | 4.449123325  |
| O | 1.233865601  | 16.470317550 | 1.485508171  |
| O | 5.162459088  | 16.459486485 | 1.475875801  |
| O | 7.719404901  | 16.448979035 | 7.402938601  |



|   |              |              |              |
|---|--------------|--------------|--------------|
| O | 7.722469219  | 16.448133209 | 10.366767042 |
| O | 1.231383831  | 16.467327157 | 7.402982844  |
| O | 11.648524045 | 16.462259706 | 7.406530896  |
| O | 11.650479639 | 16.465625862 | 10.358813529 |
| O | 3.211681087  | 17.742725990 | 8.880010848  |
| O | 3.208587025  | 17.737028457 | 0.007046065  |
| O | 9.637504250  | 17.757335765 | 2.980941969  |
| O | 9.673323074  | 17.712608108 | 5.936359919  |
| O | 3.194540287  | 17.739405554 | 2.966981266  |
| O | 3.189488683  | 17.736818429 | 5.934306774  |
| O | 9.667886612  | 17.735692924 | 8.886451237  |
| O | 9.668511113  | 17.748603190 | 0.007953513  |
| O | 6.450741136  | 18.556237054 | -0.004757983 |
| O | 6.424583771  | 18.549489740 | 5.943478381  |
| O | -0.060703417 | 18.509825248 | 0.010886663  |
| O | 6.515779175  | 18.456804003 | 2.881523644  |
| O | -0.060497934 | 18.516664003 | 5.943362214  |
| O | 6.452147044  | 18.460977408 | 8.928128811  |
| O | -0.050139496 | 18.515799961 | 8.886078132  |
| O | -0.042011494 | 18.514527651 | 2.973255331  |
| O | 1.954393693  | 19.928177130 | 4.461904971  |
| O | 4.421018119  | 19.934400090 | 1.508204797  |

|   |              |              |              |
|---|--------------|--------------|--------------|
| O | 4.377320288  | 19.979422785 | 4.476216303  |
| O | 1.987019480  | 19.965603114 | 7.433627659  |
| O | 1.987365372  | 19.936452502 | 10.359720860 |
| O | 4.480381091  | 19.943956702 | 7.387664813  |
| O | 4.458275452  | 19.961233255 | 10.357309396 |
| O | 8.453217808  | 19.999191809 | 1.480314740  |
| O | 8.452893348  | 20.069459960 | 4.603234977  |
| O | 10.896098448 | 19.909498607 | 1.530550320  |
| O | 10.927892302 | 19.943003719 | 4.437833864  |
| O | 8.417784491  | 19.967120099 | 7.394984970  |
| O | 8.444454654  | 20.006004489 | 10.360549050 |
| O | 10.916209136 | 19.967747681 | 7.453588808  |
| O | 10.902387754 | 19.925627510 | 10.362955072 |
| O | 1.954911167  | 19.923996939 | 1.472300186  |
| O | -0.073367756 | 21.118948784 | 0.017374488  |
| O | 6.412598746  | 21.052263245 | 3.066366941  |
| O | -0.043236728 | 21.126704802 | 2.968435952  |
| O | -0.051349272 | 21.128533971 | 5.939720472  |
| O | -0.044657962 | 21.130173472 | 8.901081968  |
| O | 6.436885723  | 21.152864664 | 8.809105172  |
| O | 6.432404198  | 21.177731500 | 0.027223813  |
| H | 0.000000000  | 0.932899949  | 9.814800036  |

|   |              |              |              |
|---|--------------|--------------|--------------|
| H | 0.816399984  | 0.932899949  | 8.400899982  |
| H | 6.457700016  | 0.932899949  | 6.856699960  |
| H | 0.834099951  | 0.932899949  | -0.439200043 |
| H | 0.000000000  | 0.932899949  | 3.900000036  |
| H | 0.816399984  | 0.932899949  | 2.486099982  |
| H | 6.457700016  | 0.932899949  | 0.941899960  |
| H | 0.834099951  | 0.932899949  | 5.475599957  |
| H | 6.494400000  | 0.932899949  | 9.814800036  |
| H | 7.310799984  | 0.932899949  | 8.400899982  |
| H | -0.036699984 | 0.932899949  | 6.856699960  |
| H | 7.328499951  | 0.932899949  | -0.439200043 |
| H | 6.494400000  | 0.932899949  | 3.900000036  |
| H | 7.310799984  | 0.932899949  | 2.486099982  |
| H | -0.036699984 | 0.932899949  | 0.941899960  |
| H | 7.328499951  | 0.932899949  | 5.475599957  |
| H | 7.490826180  | 20.714488910 | 5.162030265  |
| H | 7.213562450  | 21.738280075 | 8.768982836  |

7-Ec:

|    |             |             |             |
|----|-------------|-------------|-------------|
| Ti | 3.247200000 | 3.247194072 | 1.478700000 |
| Ti | 3.247200000 | 3.247194072 | 4.436100000 |
| Ti | 0.000000000 | 3.247194072 | 2.957400000 |
| Ti | 0.000000000 | 3.247194072 | 0.000000000 |

|    |             |             |              |
|----|-------------|-------------|--------------|
| Ti | 3.247200000 | 3.247194072 | 7.393500000  |
| Ti | 3.247200000 | 3.247194072 | 10.350900000 |
| Ti | 0.000000000 | 3.247194072 | 8.872200000  |
| Ti | 0.000000000 | 3.247194072 | 5.914800000  |
| Ti | 9.741600000 | 3.247194072 | 1.478700000  |
| Ti | 9.741600000 | 3.247194072 | 4.436100000  |
| Ti | 6.494400000 | 3.247194072 | 2.957400000  |
| Ti | 6.494400000 | 3.247194072 | 0.000000000  |
| Ti | 9.741600000 | 3.247194072 | 7.393500000  |
| Ti | 9.741600000 | 3.247194072 | 10.350900000 |
| Ti | 6.494400000 | 3.247194072 | 8.872200000  |
| Ti | 6.494400000 | 3.247194072 | 5.914800000  |
| Ti | 0.000000000 | 6.494391717 | 4.436100000  |
| Ti | 0.000000000 | 6.494391717 | 1.478700000  |
| Ti | 3.247200000 | 6.494391717 | 2.957400000  |
| Ti | 3.247200000 | 6.494391717 | 0.000000000  |
| Ti | 0.000000000 | 6.494391717 | 10.350900000 |
| Ti | 0.000000000 | 6.494391717 | 7.393500000  |
| Ti | 3.247200000 | 6.494391717 | 8.872200000  |
| Ti | 3.247200000 | 6.494391717 | 5.914800000  |
| Ti | 6.494400000 | 6.494391717 | 4.436100000  |
| Ti | 6.494400000 | 6.494391717 | 1.478700000  |

|    |              |             |              |
|----|--------------|-------------|--------------|
| Ti | 9.741600000  | 6.494391717 | 2.957400000  |
| Ti | 9.741600000  | 6.494391717 | 0.000000000  |
| Ti | 6.494400000  | 6.494391717 | 10.350900000 |
| Ti | 6.494400000  | 6.494391717 | 7.393500000  |
| Ti | 9.741600000  | 6.494391717 | 8.872200000  |
| Ti | 9.741600000  | 6.494391717 | 5.914800000  |
| Ti | 3.226015917  | 9.734751320 | 1.478947475  |
| Ti | 3.227053852  | 9.735188878 | 4.436574958  |
| Ti | -0.014396007 | 9.837641611 | 2.965600279  |
| Ti | -0.011871114 | 9.838418499 | 0.006441099  |
| Ti | 3.232179492  | 9.737199856 | 7.393829928  |
| Ti | 3.230588494  | 9.735615362 | 10.350350752 |
| Ti | -0.008620017 | 9.837618394 | 8.878353758  |
| Ti | -0.014024527 | 9.838093099 | 5.922543538  |
| Ti | 9.739601543  | 9.735252815 | 1.483207787  |
| Ti | 9.735094300  | 9.737342375 | 4.440584010  |
| Ti | 6.482640070  | 9.786612056 | 2.968799594  |
| Ti | 6.481596161  | 9.801072525 | 0.016089439  |
| Ti | 9.737889230  | 9.734717387 | 7.397150141  |
| Ti | 9.740547777  | 9.733861918 | 10.354723918 |
| Ti | 6.486960015  | 9.773524624 | 8.890841557  |
| Ti | 6.480093616  | 9.767670641 | 5.928502462  |

|    |              |              |              |
|----|--------------|--------------|--------------|
| Ti | -0.031786321 | 13.175875490 | 1.514239312  |
| Ti | -0.032992331 | 13.175831913 | 4.471187777  |
| Ti | 3.211950475  | 12.988311585 | 2.959631063  |
| Ti | 3.211844357  | 12.989954658 | 5.917254760  |
| Ti | 6.460469098  | 13.168385221 | 1.486679183  |
| Ti | 6.460916562  | 13.083706249 | 4.426355604  |
| Ti | 9.710608853  | 12.991388061 | 2.963396424  |
| Ti | 9.709184112  | 12.990867635 | 5.920439762  |
| Ti | -0.033697493 | 13.175641888 | 7.429281819  |
| Ti | -0.033332118 | 13.176124451 | 10.386675431 |
| Ti | 3.211394814  | 12.989517815 | 8.875193480  |
| Ti | 3.212549648  | 12.988412313 | 0.002333270  |
| Ti | 6.459324135  | 13.054565639 | 7.425906006  |
| Ti | 6.460773296  | 13.137354005 | 10.399642920 |
| Ti | 9.709916810  | 12.988373736 | 8.878320753  |
| Ti | 9.709686259  | 12.988264436 | 0.007082145  |
| Ti | 9.692988247  | 16.311120225 | 1.490741823  |
| Ti | 9.694232964  | 16.309121392 | 4.448169386  |
| Ti | 6.432575780  | 16.487993798 | 2.970620643  |
| Ti | -0.062054382 | 16.642299409 | 5.935429403  |
| Ti | 3.170454117  | 16.305370899 | 1.492206328  |
| Ti | 3.171694287  | 16.305892396 | 4.450747292  |

|    |              |              |              |
|----|--------------|--------------|--------------|
| Ti | -0.061918519 | 16.643932838 | 2.976575663  |
| Ti | 6.439234618  | 16.338143415 | 5.924883314  |
| Ti | 3.175722504  | 16.305559138 | 7.405731925  |
| Ti | 3.165484732  | 16.305105507 | 10.363809642 |
| Ti | -0.066292237 | 16.643192026 | 8.885566028  |
| Ti | 6.436218489  | 16.581303546 | 0.017447240  |
| Ti | 9.681183116  | 16.303626742 | 7.404529209  |
| Ti | 9.689257084  | 16.301412880 | 10.363571276 |
| Ti | 6.423769633  | 16.391479345 | 8.898007574  |
| Ti | -0.063337805 | 16.642731252 | 0.014933214  |
| Ti | 6.409900582  | 19.575217588 | 7.413339777  |
| Ti | 6.406113308  | 19.908946749 | 10.462398002 |
| Ti | 3.188134341  | 19.552622836 | 8.889405325  |
| Ti | 3.162958540  | 19.553011816 | 0.023295322  |
| Ti | 6.418415780  | 20.012115648 | 1.521126860  |
| Ti | 6.418271734  | 19.803286809 | 4.371439406  |
| Ti | 3.184587749  | 19.556220451 | 2.980689762  |
| Ti | 3.168749077  | 19.551165502 | 5.934803735  |
| Ti | -0.084530201 | 20.007134280 | 1.492969692  |
| Ti | -0.080287540 | 20.008900583 | 4.451153639  |
| Ti | 9.658959409  | 19.560147753 | 2.984266678  |
| Ti | 9.656359961  | 19.552491033 | 5.938093902  |

|    |              |              |              |
|----|--------------|--------------|--------------|
| Ti | -0.076643791 | 20.010386135 | 7.407742484  |
| Ti | -0.077187113 | 20.008101907 | 10.364342921 |
| Ti | 9.666043371  | 19.548258335 | 8.891184379  |
| Ti | 9.658816663  | 19.557609562 | 0.019957363  |
| O  | 0.000000000  | 1.266694833  | 2.957400000  |
| O  | 0.000000000  | 1.266694833  | 0.000000000  |
| O  | 0.000000000  | 1.266694833  | 8.872200000  |
| O  | 0.000000000  | 1.266694833  | 5.914800000  |
| O  | 6.494400000  | 1.266694833  | 2.957400000  |
| O  | 6.494400000  | 1.266694833  | 0.000000000  |
| O  | 6.494400000  | 1.266694833  | 8.872200000  |
| O  | 6.494400000  | 1.266694833  | 5.914800000  |
| O  | 9.741600000  | 1.980495667  | 8.872200000  |
| O  | 9.741600000  | 1.980495667  | 5.914800000  |
| O  | 9.741600000  | 1.980495667  | 2.957400000  |
| O  | 9.741600000  | 1.980495667  | 0.000000000  |
| O  | 3.247200000  | 1.980495667  | 8.872200000  |
| O  | 3.247200000  | 1.980495667  | 5.914800000  |
| O  | 3.247200000  | 1.980495667  | 2.957400000  |
| O  | 3.247200000  | 1.980495667  | 0.000000000  |
| O  | 1.266698949  | 3.247194072  | 1.478700000  |
| O  | 1.266698949  | 3.247194072  | 4.436100000  |



|   |              |             |              |
|---|--------------|-------------|--------------|
| O | 5.227599738  | 3.247194072 | 1.478700000  |
| O | 5.227599738  | 3.247194072 | 4.436100000  |
| O | 1.266698949  | 3.247194072 | 7.393500000  |
| O | 1.266698949  | 3.247194072 | 10.350900000 |
| O | 5.227599738  | 3.247194072 | 7.393500000  |
| O | 5.227599738  | 3.247194072 | 10.350900000 |
| O | 7.761098949  | 3.247194072 | 1.478700000  |
| O | 7.761098949  | 3.247194072 | 4.436100000  |
| O | 11.721999738 | 3.247194072 | 1.478700000  |
| O | 11.721999738 | 3.247194072 | 4.436100000  |
| O | 7.761098949  | 3.247194072 | 7.393500000  |
| O | 7.761098949  | 3.247194072 | 10.350900000 |
| O | 11.721999738 | 3.247194072 | 7.393500000  |
| O | 11.721999738 | 3.247194072 | 10.350900000 |
| O | 9.741600000  | 4.513896049 | 8.872200000  |
| O | 9.741600000  | 4.513896049 | 5.914800000  |
| O | 9.741600000  | 4.513896049 | 2.957400000  |
| O | 9.741600000  | 4.513896049 | 0.000000000  |
| O | 3.247200000  | 4.513896049 | 8.872200000  |
| O | 3.247200000  | 4.513896049 | 5.914800000  |
| O | 3.247200000  | 4.513896049 | 2.957400000  |
| O | 3.247200000  | 4.513896049 | 0.000000000  |

|   |              |             |              |
|---|--------------|-------------|--------------|
| O | 0.000000000  | 5.227596870 | 2.957400000  |
| O | 0.000000000  | 5.227596870 | 0.000000000  |
| O | 0.000000000  | 5.227596870 | 8.872200000  |
| O | 0.000000000  | 5.227596870 | 5.914800000  |
| O | 6.494400000  | 5.227596870 | 0.000000000  |
| O | 6.494400000  | 5.227596870 | 2.957400000  |
| O | 6.494400000  | 5.227596870 | 8.872200000  |
| O | 6.494400000  | 5.227596870 | 5.914800000  |
| O | 8.474899752  | 6.494391717 | 7.393500000  |
| O | 11.008298949 | 6.494391717 | 7.393500000  |
| O | 8.474899752  | 6.494391717 | 10.350900000 |
| O | 11.008298949 | 6.494391717 | 10.350900000 |
| O | 8.474899752  | 6.494391717 | 1.478700000  |
| O | 11.008298949 | 6.494391717 | 1.478700000  |
| O | 8.474899752  | 6.494391717 | 4.436100000  |
| O | 11.008298949 | 6.494391717 | 4.436100000  |
| O | 1.980499752  | 6.494391717 | 1.478700000  |
| O | 4.513898949  | 6.494391717 | 1.478700000  |
| O | 1.980499752  | 6.494391717 | 4.436100000  |
| O | 4.513898949  | 6.494391717 | 4.436100000  |
| O | 1.980499752  | 6.494391717 | 7.393500000  |
| O | 4.513898949  | 6.494391717 | 7.393500000  |

|   |             |             |              |
|---|-------------|-------------|--------------|
| O | 1.980499752 | 6.494391717 | 10.350900000 |
| O | 4.513898949 | 6.494391717 | 10.350900000 |
| O | 0.000000000 | 7.761086550 | 8.872200000  |
| O | 0.000000000 | 7.761086550 | 5.914800000  |
| O | 6.494400000 | 7.761086550 | 2.957400000  |
| O | 6.494400000 | 7.761086550 | 0.000000000  |
| O | 0.000000000 | 7.761086550 | 2.957400000  |
| O | 0.000000000 | 7.761086550 | 0.000000000  |
| O | 6.494400000 | 7.761086550 | 8.872200000  |
| O | 6.494400000 | 7.761086550 | 5.914800000  |
| O | 3.247200000 | 8.474887384 | 2.957400000  |
| O | 3.247200000 | 8.474887384 | 0.000000000  |
| O | 3.247200000 | 8.474887384 | 8.872200000  |
| O | 3.247200000 | 8.474887384 | 5.914800000  |
| O | 9.741600000 | 8.474887384 | 2.957400000  |
| O | 9.741600000 | 8.474887384 | 0.000000000  |
| O | 9.741600000 | 8.474887384 | 8.872200000  |
| O | 9.741600000 | 8.474887384 | 5.914800000  |
| O | 1.270053177 | 9.785668361 | 1.482395567  |
| O | 1.269569344 | 9.785517269 | 4.439162329  |
| O | 5.211281779 | 9.778392406 | 1.485613455  |
| O | 5.211301002 | 9.774892303 | 4.442597290  |

|   |              |              |              |
|---|--------------|--------------|--------------|
| O | 1.270959925  | 9.785952327  | 7.395947426  |
| O | 1.271286853  | 9.785739084  | 10.354639810 |
| O | 5.211720670  | 9.773704290  | 7.400017518  |
| O | 5.211741972  | 9.776996508  | 10.356388934 |
| O | 7.760276888  | 9.787915084  | 1.485035106  |
| O | 7.759832281  | 9.783957065  | 4.442886760  |
| O | 11.700849426 | 9.776103177  | 1.481730389  |
| O | 11.700249863 | 9.775977803  | 4.439671356  |
| O | 7.760216880  | 9.782791912  | 7.398716026  |
| O | 7.760816573  | 9.785938396  | 10.357386879 |
| O | 11.701371056 | 9.775934940  | 7.397652071  |
| O | 11.701965294 | 9.776016379  | 10.353879995 |
| O | 9.726799782  | 11.068509956 | 2.961231371  |
| O | 9.727174509  | 11.067519826 | 0.003118992  |
| O | 3.243407270  | 11.067405525 | 2.960347700  |
| O | 3.243221141  | 11.067235146 | 0.002561936  |
| O | 3.243662760  | 11.067348732 | 8.874445258  |
| O | 3.243593010  | 11.067109058 | 5.917145810  |
| O | 9.726702106  | 11.067679490 | 8.875318992  |
| O | 9.725726517  | 11.068138122 | 5.918347697  |
| O | 6.463441455  | 11.801691191 | 8.882018686  |
| O | -0.031556809 | 11.793113637 | 2.960302984  |

|   |              |              |              |
|---|--------------|--------------|--------------|
| O | 6.463266626  | 11.810902043 | 0.007973032  |
| O | 6.463076989  | 11.802713468 | 5.923924170  |
| O | -0.030928541 | 11.793107207 | 0.003246397  |
| O | -0.031454328 | 11.793326879 | 5.917525658  |
| O | 6.463309489  | 11.807617326 | 2.967418843  |
| O | -0.030666687 | 11.793126853 | 8.875567059  |
| O | 8.439216401  | 13.094695549 | 1.487284977  |
| O | 8.438398237  | 13.095830341 | 4.444692548  |
| O | 10.968225773 | 13.109053148 | 1.485444292  |
| O | 10.968009770 | 13.110133647 | 4.443411876  |
| O | 1.954636064  | 13.087330297 | 1.484802654  |
| O | 1.954289912  | 13.087651053 | 4.441352461  |
| O | 4.483435147  | 13.114451714 | 1.485340309  |
| O | 4.484239804  | 13.114403850 | 4.444613881  |
| O | 1.954004548  | 13.087108124 | 7.399878165  |
| O | 1.954416034  | 13.087361015 | 10.357199853 |
| O | 4.484993024  | 13.113437295 | 7.398407983  |
| O | 4.483878975  | 13.114690673 | 10.356038778 |
| O | 8.436930372  | 13.095080957 | 7.400636324  |
| O | 8.438412784  | 13.095289555 | 10.356734832 |
| O | 10.967808184 | 13.109260318 | 7.400235064  |
| O | 10.967926122 | 13.108993140 | 10.358683285 |

|   |              |              |              |
|---|--------------|--------------|--------------|
| O | -0.033264057 | 14.404945028 | 2.970707590  |
| O | -0.031928289 | 14.404453535 | 5.928856404  |
| O | -0.033771140 | 14.404090630 | 8.886960265  |
| O | -0.032254957 | 14.404889306 | 0.014417680  |
| O | 6.458155273  | 14.419789476 | 2.971228566  |
| O | 6.462157642  | 14.408502280 | 5.926871279  |
| O | 6.455862230  | 14.414858472 | 8.880257732  |
| O | 6.462552502  | 14.418941508 | 0.010382603  |
| O | 9.687334092  | 15.105762729 | 8.887076432  |
| O | 3.180334307  | 15.105739511 | 8.887238261  |
| O | 9.687794805  | 15.106802151 | 5.926371123  |
| O | 9.686771028  | 15.110501922 | 2.967374955  |
| O | 3.183376933  | 15.108280916 | 2.968734768  |
| O | 9.683915570  | 15.109933991 | 0.016824649  |
| O | 3.179450030  | 15.107756919 | 0.015533803  |
| O | 3.177001381  | 15.104587932 | 5.927894539  |
| O | 1.222810833  | 16.473992675 | 10.365422490 |
| O | 5.151155195  | 16.428568498 | 4.452641093  |
| O | 5.148624197  | 16.423646067 | 7.404147823  |
| O | 7.717523084  | 16.461681416 | 1.489605827  |
| O | 7.721703269  | 16.439593874 | 4.445927085  |
| O | 5.149332736  | 16.433769538 | 10.376931153 |

|   |              |              |              |
|---|--------------|--------------|--------------|
| O | 11.643828204 | 16.463653104 | 1.493569216  |
| O | 11.645692876 | 16.458824970 | 4.453302131  |
| O | 1.223631076  | 16.471664869 | 4.450153092  |
| O | 1.225237401  | 16.478056780 | 1.494891528  |
| O | 5.153467591  | 16.449066903 | 1.485922681  |
| O | 7.719561156  | 16.435538342 | 7.412533826  |
| O | 7.717224991  | 16.448309661 | 10.369424562 |
| O | 1.222456499  | 16.469851417 | 7.411525116  |
| O | 11.643976276 | 16.457561947 | 7.408585816  |
| O | 11.643617266 | 16.460139428 | 10.368285135 |
| O | 3.195467168  | 17.727276105 | 8.886722490  |
| O | 3.193115676  | 17.731024097 | 0.013926397  |
| O | 9.670050676  | 17.735316446 | 2.978980739  |
| O | 9.669821164  | 17.726624234 | 5.933453623  |
| O | 3.201543199  | 17.731466655 | 2.978427232  |
| O | 3.188409314  | 17.723704565 | 5.930208527  |
| O | 9.669491248  | 17.725434078 | 8.887239089  |
| O | 9.667281463  | 17.734358820 | 0.010594590  |
| O | 6.431357301  | 18.520966353 | 0.005520874  |
| O | 6.442871482  | 18.452059452 | 5.922988686  |
| O | -0.073078236 | 18.510594635 | 0.016789396  |
| O | 6.420256033  | 18.475545034 | 2.975085962  |

|   |              |              |              |
|---|--------------|--------------|--------------|
| O | -0.069337332 | 18.512433805 | 5.937787634  |
| O | 6.411522234  | 18.445733264 | 8.910896514  |
| O | -0.075136441 | 18.512654905 | 8.886699186  |
| O | -0.078159065 | 18.511552261 | 2.978510276  |
| O | 1.956937549  | 19.927448820 | 4.452791447  |
| O | 4.410085186  | 19.936106028 | 1.494014009  |
| O | 4.426653050  | 19.943563793 | 4.483355703  |
| O | 1.968721118  | 19.947425728 | 7.416935147  |
| O | 1.959177338  | 19.925172807 | 10.362929165 |
| O | 4.446207428  | 19.899206542 | 7.401107497  |
| O | 4.421110988  | 19.936064594 | 10.361536348 |
| O | 8.429738993  | 19.931926551 | 1.501279158  |
| O | 8.416088544  | 19.946647412 | 4.477729190  |
| O | 10.882248360 | 19.932660933 | 1.498564619  |
| O | 10.881869607 | 19.938791381 | 4.459868860  |
| O | 8.402651760  | 19.933177430 | 7.411661867  |
| O | 8.424423717  | 19.960686397 | 10.352446247 |
| O | 10.876104528 | 19.950601145 | 7.414164537  |
| O | 10.883146795 | 19.933417461 | 10.367478711 |
| O | 1.952190403  | 19.916206273 | 1.504110572  |
| O | -0.067951687 | 21.116092695 | 0.016872322  |
| O | 6.421904312  | 21.080124759 | 3.027471926  |



|   |              |              |              |
|---|--------------|--------------|--------------|
| O | -0.072801834 | 21.118818410 | 2.973327373  |
| O | -0.069738036 | 21.118689107 | 5.930827688  |
| O | -0.072153304 | 21.119473853 | 8.888804263  |
| O | 6.414434193  | 21.110348727 | 8.817034435  |
| O | 6.428240378  | 21.113410200 | 0.011783583  |
| H | 0.000000000  | 0.932897449  | 9.814799089  |
| H | 0.816399334  | 0.932897449  | 8.400899272  |
| H | 6.457698847  | 0.932897449  | 6.856699960  |
| H | 0.834099172  | 0.932897449  | -0.439201108 |
| H | 0.000000000  | 0.932897449  | 3.899999089  |
| H | 0.816399334  | 0.932897449  | 2.486099272  |
| H | 6.457698847  | 0.932897449  | 0.941899960  |
| H | 0.834099172  | 0.932897449  | 5.475598892  |
| H | 6.494400000  | 0.932897449  | 9.814799089  |
| H | 7.310799334  | 0.932897449  | 8.400899272  |
| H | -0.036701153 | 0.932897449  | 6.856699960  |
| H | 7.328499172  | 0.932897449  | -0.439201108 |
| H | 6.494400000  | 0.932897449  | 3.899999089  |
| H | 7.310799334  | 0.932897449  | 2.486099272  |
| H | -0.036701153 | 0.932897449  | 0.941899960  |
| H | 7.328499172  | 0.932897449  | 5.475598892  |
| H | 6.423617015  | 20.833219852 | 5.958272242  |

H 7.171158953 21.719763002 8.770094345

TS7-E3:

|    |             |             |              |
|----|-------------|-------------|--------------|
| Ti | 3.247200000 | 3.247194072 | 1.478700000  |
| Ti | 3.247200000 | 3.247194072 | 4.436100000  |
| Ti | 0.000000000 | 3.247194072 | 2.957400000  |
| Ti | 0.000000000 | 3.247194072 | 0.000000000  |
| Ti | 3.247200000 | 3.247194072 | 7.393500000  |
| Ti | 3.247200000 | 3.247194072 | 10.350900000 |
| Ti | 0.000000000 | 3.247194072 | 8.872200000  |
| Ti | 0.000000000 | 3.247194072 | 5.914800000  |
| Ti | 9.741600000 | 3.247194072 | 1.478700000  |
| Ti | 9.741600000 | 3.247194072 | 4.436100000  |
| Ti | 6.494400000 | 3.247194072 | 2.957400000  |
| Ti | 6.494400000 | 3.247194072 | 0.000000000  |
| Ti | 9.741600000 | 3.247194072 | 7.393500000  |
| Ti | 9.741600000 | 3.247194072 | 10.350900000 |
| Ti | 6.494400000 | 3.247194072 | 8.872200000  |
| Ti | 6.494400000 | 3.247194072 | 5.914800000  |
| Ti | 0.000000000 | 6.494391717 | 4.436100000  |
| Ti | 0.000000000 | 6.494391717 | 1.478700000  |
| Ti | 3.247200000 | 6.494391717 | 2.957400000  |
| Ti | 3.247200000 | 6.494391717 | 0.000000000  |

|    |              |             |              |
|----|--------------|-------------|--------------|
| Ti | 0.000000000  | 6.494391717 | 10.350900000 |
| Ti | 0.000000000  | 6.494391717 | 7.393500000  |
| Ti | 3.247200000  | 6.494391717 | 8.872200000  |
| Ti | 3.247200000  | 6.494391717 | 5.914800000  |
| Ti | 6.494400000  | 6.494391717 | 4.436100000  |
| Ti | 6.494400000  | 6.494391717 | 1.478700000  |
| Ti | 9.741600000  | 6.494391717 | 2.957400000  |
| Ti | 9.741600000  | 6.494391717 | 0.000000000  |
| Ti | 6.494400000  | 6.494391717 | 10.350900000 |
| Ti | 6.494400000  | 6.494391717 | 7.393500000  |
| Ti | 9.741600000  | 6.494391717 | 8.872200000  |
| Ti | 9.741600000  | 6.494391717 | 5.914800000  |
| Ti | 3.222922634  | 9.736910175 | 1.479930278  |
| Ti | 3.225575337  | 9.736652999 | 4.437058198  |
| Ti | -0.017651390 | 9.836044616 | 2.969643636  |
| Ti | -0.015589807 | 9.837048319 | 0.010906891  |
| Ti | 3.225522212  | 9.736017201 | 7.393618296  |
| Ti | 3.223892508  | 9.735013498 | 10.351716242 |
| Ti | -0.016073380 | 9.835301661 | 8.881486236  |
| Ti | -0.015724241 | 9.837284064 | 5.924902478  |
| Ti | 9.736128078  | 9.736110070 | 1.482840360  |
| Ti | 9.732699685  | 9.737453104 | 4.439542414  |

|    |              |              |              |
|----|--------------|--------------|--------------|
| Ti | 6.478074118  | 9.766310463  | 2.969584488  |
| Ti | 6.479561595  | 9.773086352  | 0.015449458  |
| Ti | 9.734883362  | 9.736899459  | 7.396587526  |
| Ti | 9.737359806  | 9.735670727  | 10.354200458 |
| Ti | 6.480645640  | 9.772647009  | 8.891505907  |
| Ti | 6.480244936  | 9.739635533  | 5.931515225  |
| Ti | -0.033212491 | 13.174322072 | 1.514874917  |
| Ti | -0.034212889 | 13.172286090 | 4.470914513  |
| Ti | 3.216220153  | 12.990740833 | 2.970519026  |
| Ti | 3.208988379  | 12.991794543 | 5.928628802  |
| Ti | 6.460347783  | 13.133095232 | 1.453266360  |
| Ti | 6.459555206  | 13.019980385 | 4.439767176  |
| Ti | 9.700550846  | 12.991940990 | 2.973665700  |
| Ti | 9.716236900  | 12.994605626 | 5.931006552  |
| Ti | -0.032367960 | 13.174439944 | 7.429674917  |
| Ti | -0.032690991 | 13.171582427 | 10.385300477 |
| Ti | 3.218923253  | 12.988061910 | 8.886087950  |
| Ti | 3.208418690  | 12.991508791 | 0.013426596  |
| Ti | 6.460773426  | 13.037271940 | 7.449051802  |
| Ti | 6.462414171  | 13.151108311 | 10.420398900 |
| Ti | 9.701871547  | 12.991419493 | 8.888359234  |
| Ti | 9.718035979  | 12.990762264 | 0.017188409  |

|    |              |              |              |
|----|--------------|--------------|--------------|
| Ti | 9.688662717  | 16.311273103 | 1.509823678  |
| Ti | 9.689642852  | 16.310705171 | 4.467756010  |
| Ti | 6.439755729  | 16.337798013 | 2.968235914  |
| Ti | -0.060568853 | 16.631525852 | 5.952169706  |
| Ti | 3.177050219  | 16.310080089 | 1.505624170  |
| Ti | 3.177733949  | 16.308294140 | 4.462610134  |
| Ti | -0.061524439 | 16.633986889 | 2.994213715  |
| Ti | 6.432738400  | 16.294835231 | 5.941712340  |
| Ti | 3.186558020  | 16.309101389 | 7.422494350  |
| Ti | 3.176449357  | 16.306226012 | 10.379172744 |
| Ti | -0.056903413 | 16.633076056 | 8.906198270  |
| Ti | 6.424461027  | 16.760317757 | 0.036506146  |
| Ti | 9.688696877  | 16.311533851 | 7.426812154  |
| Ti | 9.693652494  | 16.309780050 | 10.386459778 |
| Ti | 6.445312207  | 16.377435358 | 8.932613767  |
| Ti | -0.062474959 | 16.634497671 | 0.036790056  |
| Ti | 6.414472120  | 19.533571050 | 7.454528906  |
| Ti | 3.171094724  | 19.552169920 | 8.904128090  |
| Ti | 3.173861988  | 19.554513085 | 0.029609489  |
| Ti | 9.651766472  | 19.563307096 | 2.988949543  |
| Ti | 9.656662990  | 19.552019900 | 5.946219418  |
| Ti | 6.415522654  | 19.670056822 | 4.236735751  |

|    |              |              |              |
|----|--------------|--------------|--------------|
| Ti | 3.180446141  | 19.547676473 | 5.943214699  |
| Ti | 3.182179626  | 19.558738639 | 2.986595453  |
| Ti | -0.080247794 | 19.998207037 | 1.501519298  |
| Ti | -0.079885796 | 19.999914403 | 4.456789970  |
| Ti | 9.658640015  | 19.554180898 | 8.905618620  |
| Ti | 9.660465980  | 19.560320990 | 0.030342924  |
| Ti | -0.080913600 | 20.002486170 | 7.415207316  |
| Ti | -0.080769164 | 19.999885828 | 10.373151478 |
| Ti | 6.412632387  | 20.104878181 | 10.323680090 |
| Ti | 6.414946471  | 20.103399415 | 1.440170993  |
| O  | 0.000000000  | 1.266694833  | 2.957400000  |
| O  | 0.000000000  | 1.266694833  | 0.000000000  |
| O  | 0.000000000  | 1.266694833  | 8.872200000  |
| O  | 0.000000000  | 1.266694833  | 5.914800000  |
| O  | 6.494400000  | 1.266694833  | 2.957400000  |
| O  | 6.494400000  | 1.266694833  | 0.000000000  |
| O  | 6.494400000  | 1.266694833  | 8.872200000  |
| O  | 6.494400000  | 1.266694833  | 5.914800000  |
| O  | 9.741600000  | 1.980495667  | 8.872200000  |
| O  | 9.741600000  | 1.980495667  | 5.914800000  |
| O  | 9.741600000  | 1.980495667  | 2.957400000  |
| O  | 9.741600000  | 1.980495667  | 0.000000000  |

|   |              |             |              |
|---|--------------|-------------|--------------|
| O | 3.247200000  | 1.980495667 | 8.872200000  |
| O | 3.247200000  | 1.980495667 | 5.914800000  |
| O | 3.247200000  | 1.980495667 | 2.957400000  |
| O | 3.247200000  | 1.980495667 | 0.000000000  |
| O | 1.266698949  | 3.247194072 | 1.478700000  |
| O | 1.266698949  | 3.247194072 | 4.436100000  |
| O | 5.227599738  | 3.247194072 | 1.478700000  |
| O | 5.227599738  | 3.247194072 | 4.436100000  |
| O | 1.266698949  | 3.247194072 | 7.393500000  |
| O | 1.266698949  | 3.247194072 | 10.350900000 |
| O | 5.227599738  | 3.247194072 | 7.393500000  |
| O | 5.227599738  | 3.247194072 | 10.350900000 |
| O | 7.761098949  | 3.247194072 | 1.478700000  |
| O | 7.761098949  | 3.247194072 | 4.436100000  |
| O | 11.721999738 | 3.247194072 | 1.478700000  |
| O | 11.721999738 | 3.247194072 | 4.436100000  |
| O | 7.761098949  | 3.247194072 | 7.393500000  |
| O | 7.761098949  | 3.247194072 | 10.350900000 |
| O | 11.721999738 | 3.247194072 | 7.393500000  |
| O | 11.721999738 | 3.247194072 | 10.350900000 |
| O | 9.741600000  | 4.513896049 | 8.872200000  |
| O | 9.741600000  | 4.513896049 | 5.914800000  |

|   |              |             |              |
|---|--------------|-------------|--------------|
| O | 9.741600000  | 4.513896049 | 2.957400000  |
| O | 9.741600000  | 4.513896049 | 0.000000000  |
| O | 3.247200000  | 4.513896049 | 8.872200000  |
| O | 3.247200000  | 4.513896049 | 5.914800000  |
| O | 3.247200000  | 4.513896049 | 2.957400000  |
| O | 3.247200000  | 4.513896049 | 0.000000000  |
| O | 0.000000000  | 5.227596870 | 2.957400000  |
| O | 0.000000000  | 5.227596870 | 0.000000000  |
| O | 0.000000000  | 5.227596870 | 8.872200000  |
| O | 0.000000000  | 5.227596870 | 5.914800000  |
| O | 6.494400000  | 5.227596870 | 0.000000000  |
| O | 6.494400000  | 5.227596870 | 2.957400000  |
| O | 6.494400000  | 5.227596870 | 8.872200000  |
| O | 6.494400000  | 5.227596870 | 5.914800000  |
| O | 8.474899752  | 6.494391717 | 7.393500000  |
| O | 11.008298949 | 6.494391717 | 7.393500000  |
| O | 8.474899752  | 6.494391717 | 10.350900000 |
| O | 11.008298949 | 6.494391717 | 10.350900000 |
| O | 8.474899752  | 6.494391717 | 1.478700000  |
| O | 11.008298949 | 6.494391717 | 1.478700000  |
| O | 8.474899752  | 6.494391717 | 4.436100000  |
| O | 11.008298949 | 6.494391717 | 4.436100000  |



|   |             |             |              |
|---|-------------|-------------|--------------|
| O | 1.980499752 | 6.494391717 | 1.478700000  |
| O | 4.513898949 | 6.494391717 | 1.478700000  |
| O | 1.980499752 | 6.494391717 | 4.436100000  |
| O | 4.513898949 | 6.494391717 | 4.436100000  |
| O | 1.980499752 | 6.494391717 | 7.393500000  |
| O | 4.513898949 | 6.494391717 | 7.393500000  |
| O | 1.980499752 | 6.494391717 | 10.350900000 |
| O | 4.513898949 | 6.494391717 | 10.350900000 |
| O | 0.000000000 | 7.761086550 | 8.872200000  |
| O | 0.000000000 | 7.761086550 | 5.914800000  |
| O | 6.494400000 | 7.761086550 | 2.957400000  |
| O | 6.494400000 | 7.761086550 | 0.000000000  |
| O | 0.000000000 | 7.761086550 | 2.957400000  |
| O | 0.000000000 | 7.761086550 | 0.000000000  |
| O | 6.494400000 | 7.761086550 | 8.872200000  |
| O | 6.494400000 | 7.761086550 | 5.914800000  |
| O | 3.247200000 | 8.474887384 | 2.957400000  |
| O | 3.247200000 | 8.474887384 | 0.000000000  |
| O | 3.247200000 | 8.474887384 | 8.872200000  |
| O | 3.247200000 | 8.474887384 | 5.914800000  |
| O | 9.741600000 | 8.474887384 | 2.957400000  |
| O | 9.741600000 | 8.474887384 | 0.000000000  |

|   |              |              |              |
|---|--------------|--------------|--------------|
| O | 9.741600000  | 8.474887384  | 8.872200000  |
| O | 9.741600000  | 8.474887384  | 5.914800000  |
| O | 1.267428010  | 9.785977330  | 1.486507536  |
| O | 1.267340856  | 9.784612865  | 4.443801070  |
| O | 5.209514653  | 9.775043752  | 1.488766990  |
| O | 5.209848205  | 9.772125512  | 4.448166192  |
| O | 1.267598813  | 9.784734309  | 7.401047285  |
| O | 1.267682981  | 9.785587993  | 10.358660218 |
| O | 5.210054857  | 9.772568427  | 7.401839868  |
| O | 5.209913669  | 9.775254494  | 10.360209895 |
| O | 7.757170487  | 9.783016227  | 1.488707842  |
| O | 7.756941494  | 9.780619484  | 4.447752156  |
| O | 11.698012542 | 9.776665393  | 1.486353751  |
| O | 11.698068264 | 9.775661690  | 4.443848388  |
| O | 7.757521444  | 9.780990961  | 7.401484980  |
| O | 7.757708093  | 9.783326982  | 10.360612102 |
| O | 11.698534042 | 9.775790278  | 7.401449491  |
| O | 11.698320896 | 9.776383213  | 10.358388137 |
| O | 9.721677259  | 11.069299346 | 2.966769043  |
| O | 9.724006151  | 11.069449365 | 0.007819366  |
| O | 3.240744047  | 11.067920593 | 2.966071097  |
| O | 3.241369198  | 11.068663548 | 0.006695554  |

|   |              |              |              |
|---|--------------|--------------|--------------|
| O | 3.241454404  | 11.067295511 | 8.878031993  |
| O | 3.241761070  | 11.068892149 | 5.921779464  |
| O | 9.722413854  | 11.069302917 | 8.878954702  |
| O | 9.723282675  | 11.070488787 | 5.922855958  |
| O | 6.462920474  | 11.798937972 | 8.887992516  |
| O | -0.033452265 | 11.792658577 | 2.972056874  |
| O | 6.461920596  | 11.799795228 | 0.017448660  |
| O | 6.461676797  | 11.800448885 | 5.938163460  |
| O | -0.033925187 | 11.792172799 | 0.013497574  |
| O | -0.033940644 | 11.792615714 | 5.928616973  |
| O | 6.462358189  | 11.794926732 | 2.982526070  |
| O | -0.033219765 | 11.792697868 | 8.886028802  |
| O | 8.435015304  | 13.088925149 | 1.500596590  |
| O | 8.430725363  | 13.094386580 | 4.459013935  |
| O | 10.965363042 | 13.110420827 | 1.499389970  |
| O | 10.964885704 | 13.113678398 | 4.453406705  |
| O | 1.954985203  | 13.088396508 | 1.496621844  |
| O | 1.955151979  | 13.091789810 | 4.454140140  |
| O | 4.486045766  | 13.104462902 | 1.500454634  |
| O | 4.489814467  | 13.109181379 | 4.455524203  |
| O | 1.955798951  | 13.091225451 | 7.411149763  |
| O | 1.955708679  | 13.089693107 | 10.367142041 |

|   |              |              |              |
|---|--------------|--------------|--------------|
| O | 4.489842523  | 13.108645594 | 7.409600086  |
| O | 4.486551550  | 13.106795351 | 10.365391260 |
| O | 8.431294792  | 13.094504452 | 7.410156077  |
| O | 8.435353402  | 13.090682522 | 10.368360490 |
| O | 10.965429285 | 13.114110597 | 7.413113477  |
| O | 10.965532676 | 13.111731714 | 10.367177530 |
| O | -0.033111698 | 14.400743762 | 2.979888070  |
| O | -0.033804651 | 14.400508017 | 5.938258097  |
| O | -0.032448750 | 14.400704471 | 8.896805568  |
| O | -0.033938565 | 14.400157971 | 0.023765666  |
| O | 6.459021886  | 14.411820216 | 2.986086780  |
| O | 6.456542714  | 14.415681437 | 5.941014394  |
| O | 6.459918243  | 14.427050786 | 8.888998032  |
| O | 6.459864210  | 14.384173730 | 0.025528277  |
| O | 9.668599827  | 15.109747538 | 8.904021624  |
| O | 3.200675677  | 15.105879173 | 8.900342618  |
| O | 9.673664549  | 15.109047446 | 5.946574306  |
| O | 9.673641300  | 15.109015299 | 2.985400663  |
| O | 3.194358834  | 15.105954182 | 2.982289478  |
| O | 9.678500929  | 15.107407945 | 0.031679669  |
| O | 3.192619893  | 15.104500420 | 0.028769587  |
| O | 3.199074937  | 15.105972042 | 5.943747031  |

|   |              |              |              |
|---|--------------|--------------|--------------|
| O | 1.229246913  | 16.465579071 | 10.383916414 |
| O | 5.158134207  | 16.443683339 | 4.460622761  |
| O | 5.160339186  | 16.469354566 | 7.427947795  |
| O | 7.714130539  | 16.467604336 | 1.494291413  |
| O | 7.715072877  | 16.459053214 | 4.462243416  |
| O | 5.158922238  | 16.458967488 | 10.392268111 |
| O | 11.643642594 | 16.452491638 | 1.511420674  |
| O | 11.645181767 | 16.445290693 | 4.467377462  |
| O | 1.228040903  | 16.460424823 | 4.467259166  |
| O | 1.229142613  | 16.468483023 | 1.509859166  |
| O | 5.156967813  | 16.450755696 | 1.498431773  |
| O | 7.714732180  | 16.485028052 | 7.425156010  |
| O | 7.715072357  | 16.476669812 | 10.397839853 |
| O | 1.229304584  | 16.460217653 | 7.424055857  |
| O | 11.646087866 | 16.444294134 | 7.426244333  |
| O | 11.645383483 | 16.450384219 | 10.382212951 |
| O | 3.189505049  | 17.725994508 | 8.904908844  |
| O | 3.204323062  | 17.728587706 | 0.030709642  |
| O | 9.668359664  | 17.736913799 | 2.991847795  |
| O | 9.685509816  | 17.727698303 | 5.943131892  |
| O | 3.203781039  | 17.732198894 | 2.989978718  |
| O | 3.188744165  | 17.722944108 | 5.940564869  |

|   |              |              |              |
|---|--------------|--------------|--------------|
| O | 9.683378353  | 17.729027049 | 8.905926190  |
| O | 9.672304362  | 17.733256176 | 0.032673355  |
| O | 6.415593833  | 18.598130410 | 0.042349968  |
| O | 6.420649334  | 18.553135219 | 5.906022437  |
| O | -0.078156857 | 18.499742496 | 0.032212001  |
| O | 6.418993911  | 18.468488394 | 2.905337930  |
| O | -0.076694318 | 18.501557020 | 5.949271454  |
| O | 6.421483475  | 18.506557676 | 8.992779113  |
| O | -0.076016432 | 18.501321275 | 8.897266922  |
| O | -0.076737960 | 18.499778215 | 2.997147456  |
| O | 1.963020594  | 19.924872411 | 4.460977649  |
| O | 4.398904946  | 19.972196480 | 1.498845809  |
| O | 4.439325442  | 19.936341773 | 4.488505128  |
| O | 1.966062961  | 19.939549337 | 7.420648932  |
| O | 1.945332056  | 19.905723469 | 10.378782367 |
| O | 4.440894230  | 19.879662905 | 7.416201002  |
| O | 4.397408896  | 19.957301667 | 10.374795792 |
| O | 8.434559657  | 19.962113013 | 1.498526410  |
| O | 8.397907601  | 19.931273251 | 4.490113954  |
| O | 10.886269823 | 19.921171925 | 1.516566550  |
| O | 10.872670549 | 19.942956927 | 4.461403514  |
| O | 8.396746532  | 19.875233753 | 7.416816142  |

|   |              |              |              |
|---|--------------|--------------|--------------|
| O | 8.434592778  | 19.946861011 | 10.376487425 |
| O | 10.869070183 | 19.957705292 | 7.422742771  |
| O | 10.888163590 | 19.926186869 | 10.377989784 |
| O | 1.947964886  | 19.900015577 | 1.515407249  |
| O | -0.068785048 | 21.107152593 | 0.027444672  |
| O | 6.421002889  | 21.074369718 | 3.030092892  |
| O | -0.068884932 | 21.108527773 | 2.984750035  |
| O | -0.069682314 | 21.109056414 | 5.939192635  |
| O | -0.068829080 | 21.109302875 | 8.896568976  |
| O | 6.422495432  | 21.218174308 | 8.881734658  |
| O | 6.419943263  | 21.220928241 | -0.008931348 |
| H | 0.000000000  | 0.932897449  | 9.814799089  |
| H | 0.816399334  | 0.932897449  | 8.400899272  |
| H | 6.457698847  | 0.932897449  | 6.856699960  |
| H | 0.834099172  | 0.932897449  | -0.439201108 |
| H | 0.000000000  | 0.932897449  | 3.899999089  |
| H | 0.816399334  | 0.932897449  | 2.486099272  |
| H | 6.457698847  | 0.932897449  | 0.941899960  |
| H | 0.834099172  | 0.932897449  | 5.475598892  |
| H | 6.494400000  | 0.932897449  | 9.814799089  |
| H | 7.310799334  | 0.932897449  | 8.400899272  |
| H | -0.036701153 | 0.932897449  | 6.856699960  |

|   |              |              |              |
|---|--------------|--------------|--------------|
| H | 7.328499172  | 0.932897449  | -0.439201108 |
| H | 6.494400000  | 0.932897449  | 3.899999089  |
| H | 7.310799334  | 0.932897449  | 2.486099272  |
| H | -0.036701153 | 0.932897449  | 0.941899960  |
| H | 7.328499172  | 0.932897449  | 5.475598892  |
| H | 6.422132395  | 21.483005497 | 7.697591698  |
| H | 6.421948863  | 21.278078599 | 6.677608097  |

TS7-F1:

|    |             |             |              |
|----|-------------|-------------|--------------|
| Ti | 3.247200000 | 3.247190143 | 1.478700000  |
| Ti | 3.247200000 | 3.247190143 | 4.436100000  |
| Ti | 0.000000000 | 3.247190143 | 2.957400000  |
| Ti | 0.000000000 | 3.247190143 | 0.000000000  |
| Ti | 3.247200000 | 3.247190143 | 7.393500000  |
| Ti | 3.247200000 | 3.247190143 | 10.350900000 |
| Ti | 0.000000000 | 3.247190143 | 8.872200000  |
| Ti | 0.000000000 | 3.247190143 | 5.914800000  |
| Ti | 9.741600000 | 3.247190143 | 1.478700000  |
| Ti | 9.741600000 | 3.247190143 | 4.436100000  |
| Ti | 6.494400000 | 3.247190143 | 2.957400000  |
| Ti | 6.494400000 | 3.247190143 | 0.000000000  |
| Ti | 9.741600000 | 3.247190143 | 7.393500000  |
| Ti | 9.741600000 | 3.247190143 | 10.350900000 |



|    |              |             |              |
|----|--------------|-------------|--------------|
| Ti | 6.494400000  | 3.247190143 | 8.872200000  |
| Ti | 6.494400000  | 3.247190143 | 5.914800000  |
| Ti | 0.000000000  | 6.494389931 | 4.436100000  |
| Ti | 0.000000000  | 6.494389931 | 1.478700000  |
| Ti | 3.247200000  | 6.494389931 | 2.957400000  |
| Ti | 3.247200000  | 6.494389931 | 0.000000000  |
| Ti | 0.000000000  | 6.494389931 | 10.350900000 |
| Ti | 0.000000000  | 6.494389931 | 7.393500000  |
| Ti | 3.247200000  | 6.494389931 | 8.872200000  |
| Ti | 3.247200000  | 6.494389931 | 5.914800000  |
| Ti | 6.494400000  | 6.494389931 | 4.436100000  |
| Ti | 6.494400000  | 6.494389931 | 1.478700000  |
| Ti | 9.741600000  | 6.494389931 | 2.957400000  |
| Ti | 9.741600000  | 6.494389931 | 0.000000000  |
| Ti | 6.494400000  | 6.494389931 | 10.350900000 |
| Ti | 6.494400000  | 6.494389931 | 7.393500000  |
| Ti | 9.741600000  | 6.494389931 | 8.872200000  |
| Ti | 9.741600000  | 6.494389931 | 5.914800000  |
| Ti | 3.226183732  | 9.734919200 | 1.479117585  |
| Ti | 3.232243786  | 9.737511325 | 4.436765888  |
| Ti | -0.010233356 | 9.837436941 | 2.960401524  |
| Ti | -0.011355718 | 9.836865081 | 0.000969791  |

|    |              |              |              |
|----|--------------|--------------|--------------|
| Ti | 3.232626956  | 9.737843869  | 7.393513131  |
| Ti | 3.229897620  | 9.737072339  | 10.350657257 |
| Ti | -0.008906290 | 9.836913301  | 8.872495858  |
| Ti | -0.009141777 | 9.837194409  | 5.916314544  |
| Ti | 9.742720674  | 9.735309251  | 1.484063186  |
| Ti | 9.741191892  | 9.737963170  | 4.441525528  |
| Ti | 6.488122513  | 9.772738806  | 2.965241132  |
| Ti | 6.480375473  | 9.772928831  | 0.015859826  |
| Ti | 9.741343731  | 9.737038763  | 7.397059763  |
| Ti | 9.741713912  | 9.735482845  | 10.355415595 |
| Ti | 6.488506981  | 9.753848827  | 8.888613570  |
| Ti | 6.482476541  | 9.741301109  | 5.925421916  |
| Ti | -0.031229751 | 13.172632207 | 1.509476479  |
| Ti | -0.030922046 | 13.174505667 | 4.466508697  |
| Ti | 3.214471861  | 12.989244922 | 2.961057357  |
| Ti | 3.214327425  | 12.993938753 | 5.917913787  |
| Ti | 6.461272975  | 13.173714492 | 1.468396655  |
| Ti | 6.463879048  | 13.037965246 | 4.415100804  |
| Ti | 9.709728862  | 12.992172092 | 2.966675944  |
| Ti | 9.714283904  | 12.995574682 | 5.923852483  |
| Ti | -0.030371191 | 13.172246799 | 7.422722424  |
| Ti | -0.032132862 | 13.172122497 | 10.380493874 |

|    |              |              |              |
|----|--------------|--------------|--------------|
| Ti | 3.215000765  | 12.991983139 | 8.876268791  |
| Ti | 3.211766683  | 12.989762847 | 0.002970649  |
| Ti | 6.463058285  | 13.006234295 | 7.428063607  |
| Ti | 6.464844375  | 13.099955882 | 10.421284582 |
| Ti | 9.710699385  | 12.989584967 | 8.881450274  |
| Ti | 9.714087384  | 12.989170984 | 0.010622389  |
| Ti | 9.695036451  | 16.309654319 | 1.488486746  |
| Ti | 9.694572231  | 16.318917320 | 4.444343812  |
| Ti | 6.433453953  | 16.415989347 | 2.940067507  |
| Ti | -0.061375067 | 16.636877626 | 5.932098661  |
| Ti | 3.175737830  | 16.306775369 | 1.489538753  |
| Ti | 3.174951489  | 16.314226705 | 4.446204726  |
| Ti | -0.058983180 | 16.636975139 | 2.971197454  |
| Ti | 6.443137103  | 16.282712925 | 5.917878653  |
| Ti | 3.179814365  | 16.307590119 | 7.404900895  |
| Ti | 3.175062153  | 16.305140869 | 10.363936574 |
| Ti | -0.061397798 | 16.632530984 | 8.884257083  |
| Ti | 6.441414528  | 16.650414760 | -0.002753458 |
| Ti | 9.682008165  | 16.307094340 | 7.404508862  |
| Ti | 9.689938607  | 16.303578164 | 10.362376250 |
| Ti | 6.427328954  | 16.297268407 | 8.892865601  |
| Ti | -0.059091377 | 16.633752930 | 0.011088594  |

|    |              |              |              |
|----|--------------|--------------|--------------|
| Ti | 6.418925980  | 19.579582089 | 7.594496734  |
| Ti | 6.413097256  | 19.995238433 | 10.566012877 |
| Ti | 3.190254633  | 19.559014390 | 8.889069364  |
| Ti | 3.182129229  | 19.555665379 | 0.019941866  |
| Ti | 6.421280200  | 20.081463322 | 1.659723992  |
| Ti | 6.423445563  | 19.545923028 | 4.391883439  |
| Ti | 3.188583624  | 19.559402655 | 2.972777770  |
| Ti | 3.189179940  | 19.556002923 | 5.927995801  |
| Ti | -0.074662870 | 19.996333576 | 1.491823522  |
| Ti | -0.073323465 | 20.004202823 | 4.451906712  |
| Ti | 9.667469152  | 19.563194224 | 2.975030836  |
| Ti | 9.649089740  | 19.561587227 | 5.930514441  |
| Ti | -0.072822616 | 20.000752728 | 7.409213613  |
| Ti | -0.071734155 | 19.996342149 | 10.364391541 |
| Ti | 9.670581918  | 19.556819459 | 8.893021516  |
| Ti | 9.652032223  | 19.558803291 | 0.021689098  |
| O  | 0.000000000  | 1.266689833  | 2.957400000  |
| O  | 0.000000000  | 1.266689833  | 0.000000000  |
| O  | 0.000000000  | 1.266689833  | 8.872200000  |
| O  | 0.000000000  | 1.266689833  | 5.914800000  |
| O  | 6.494400000  | 1.266689833  | 2.957400000  |
| O  | 6.494400000  | 1.266689833  | 0.000000000  |

|   |              |             |              |
|---|--------------|-------------|--------------|
| O | 6.494400000  | 1.266689833 | 8.872200000  |
| O | 6.494400000  | 1.266689833 | 5.914800000  |
| O | 9.741600000  | 1.980499953 | 8.872200000  |
| O | 9.741600000  | 1.980499953 | 5.914800000  |
| O | 9.741600000  | 1.980499953 | 2.957400000  |
| O | 9.741600000  | 1.980499953 | 0.000000000  |
| O | 3.247200000  | 1.980499953 | 8.872200000  |
| O | 3.247200000  | 1.980499953 | 5.914800000  |
| O | 3.247200000  | 1.980499953 | 2.957400000  |
| O | 3.247200000  | 1.980499953 | 0.000000000  |
| O | 1.266699988  | 3.247190143 | 1.478700000  |
| O | 1.266699988  | 3.247190143 | 4.436100000  |
| O | 5.227599998  | 3.247190143 | 1.478700000  |
| O | 5.227599998  | 3.247190143 | 4.436100000  |
| O | 1.266699988  | 3.247190143 | 7.393500000  |
| O | 1.266699988  | 3.247190143 | 10.350900000 |
| O | 5.227599998  | 3.247190143 | 7.393500000  |
| O | 5.227599998  | 3.247190143 | 10.350900000 |
| O | 7.761099988  | 3.247190143 | 1.478700000  |
| O | 7.761099988  | 3.247190143 | 4.436100000  |
| O | 11.721999998 | 3.247190143 | 1.478700000  |
| O | 11.721999998 | 3.247190143 | 4.436100000  |

|   |              |             |              |
|---|--------------|-------------|--------------|
| O | 7.761099988  | 3.247190143 | 7.393500000  |
| O | 7.761099988  | 3.247190143 | 10.350900000 |
| O | 11.721999998 | 3.247190143 | 7.393500000  |
| O | 11.721999998 | 3.247190143 | 10.350900000 |
| O | 9.741600000  | 4.513899978 | 8.872200000  |
| O | 9.741600000  | 4.513899978 | 5.914800000  |
| O | 9.741600000  | 4.513899978 | 2.957400000  |
| O | 9.741600000  | 4.513899978 | 0.000000000  |
| O | 3.247200000  | 4.513899978 | 8.872200000  |
| O | 3.247200000  | 4.513899978 | 5.914800000  |
| O | 3.247200000  | 4.513899978 | 2.957400000  |
| O | 3.247200000  | 4.513899978 | 0.000000000  |
| O | 0.000000000  | 5.227600085 | 2.957400000  |
| O | 0.000000000  | 5.227600085 | 0.000000000  |
| O | 0.000000000  | 5.227600085 | 8.872200000  |
| O | 0.000000000  | 5.227600085 | 5.914800000  |
| O | 6.494400000  | 5.227600085 | 0.000000000  |
| O | 6.494400000  | 5.227600085 | 2.957400000  |
| O | 6.494400000  | 5.227600085 | 8.872200000  |
| O | 6.494400000  | 5.227600085 | 5.914800000  |
| O | 8.474900012  | 6.494389931 | 7.393500000  |
| O | 11.008299988 | 6.494389931 | 7.393500000  |

|   |              |             |              |
|---|--------------|-------------|--------------|
| O | 8.474900012  | 6.494389931 | 10.350900000 |
| O | 11.008299988 | 6.494389931 | 10.350900000 |
| O | 8.474900012  | 6.494389931 | 1.478700000  |
| O | 11.008299988 | 6.494389931 | 1.478700000  |
| O | 8.474900012  | 6.494389931 | 4.436100000  |
| O | 11.008299988 | 6.494389931 | 4.436100000  |
| O | 1.980500012  | 6.494389931 | 1.478700000  |
| O | 4.513899988  | 6.494389931 | 1.478700000  |
| O | 1.980500012  | 6.494389931 | 4.436100000  |
| O | 4.513899988  | 6.494389931 | 4.436100000  |
| O | 1.980500012  | 6.494389931 | 7.393500000  |
| O | 4.513899988  | 6.494389931 | 7.393500000  |
| O | 1.980500012  | 6.494389931 | 10.350900000 |
| O | 4.513899988  | 6.494389931 | 10.350900000 |
| O | 0.000000000  | 7.761090122 | 8.872200000  |
| O | 0.000000000  | 7.761090122 | 5.914800000  |
| O | 6.494400000  | 7.761090122 | 2.957400000  |
| O | 6.494400000  | 7.761090122 | 0.000000000  |
| O | 0.000000000  | 7.761090122 | 2.957400000  |
| O | 0.000000000  | 7.761090122 | 0.000000000  |
| O | 6.494400000  | 7.761090122 | 8.872200000  |
| O | 6.494400000  | 7.761090122 | 5.914800000  |

|   |              |             |              |
|---|--------------|-------------|--------------|
| O | 3.247200000  | 8.474889884 | 2.957400000  |
| O | 3.247200000  | 8.474889884 | 0.000000000  |
| O | 3.247200000  | 8.474889884 | 8.872200000  |
| O | 3.247200000  | 8.474889884 | 5.914800000  |
| O | 9.741600000  | 8.474889884 | 2.957400000  |
| O | 9.741600000  | 8.474889884 | 0.000000000  |
| O | 9.741600000  | 8.474889884 | 8.872200000  |
| O | 9.741600000  | 8.474889884 | 5.914800000  |
| O | 1.270991488  | 9.785679434 | 1.480123811  |
| O | 1.271566112  | 9.785475121 | 4.437237416  |
| O | 5.212464799  | 9.773337814 | 1.485713888  |
| O | 5.213392199  | 9.773313882 | 4.440552898  |
| O | 1.271551435  | 9.785257592 | 7.394580752  |
| O | 1.271467657  | 9.785969472 | 10.352754172 |
| O | 5.213550143  | 9.769741985 | 7.397504911  |
| O | 5.212954477  | 9.773179221 | 10.356398990 |
| O | 7.760933082  | 9.782158614 | 1.483660624  |
| O | 7.760847096  | 9.781871791 | 4.441977064  |
| O | 11.702006208 | 9.776249267 | 1.480352004  |
| O | 11.702465622 | 9.775654546 | 4.437465018  |
| O | 7.760846577  | 9.778887828 | 7.396046795  |
| O | 7.760751499  | 9.781623901 | 10.357912823 |



|   |              |              |              |
|---|--------------|--------------|--------------|
| O | 11.702843466 | 9.775539531  | 7.394726138  |
| O | 11.702236240 | 9.776395001  | 10.352114545 |
| O | 9.726479088  | 11.068958586 | 2.961261655  |
| O | 9.726177878  | 11.068194200 | 0.003786892  |
| O | 3.244649130  | 11.067886660 | 2.959881968  |
| O | 3.245148289  | 11.068118833 | 0.002923804  |
| O | 3.244585614  | 11.067882017 | 8.873209301  |
| O | 3.245403389  | 11.068734986 | 5.916698296  |
| O | 9.727246467  | 11.067315156 | 8.874088241  |
| O | 9.727216333  | 11.069624745 | 5.917748764  |
| O | 6.465024140  | 11.784998286 | 8.879766685  |
| O | -0.029275456 | 11.792510343 | 2.959883151  |
| O | 6.464246111  | 11.800107412 | 0.017030010  |
| O | 6.463988413  | 11.794869581 | 5.916972861  |
| O | -0.029584070 | 11.792228520 | 0.002936343  |
| O | -0.029272469 | 11.792565707 | 5.916751766  |
| O | 6.465983623  | 11.803038153 | 2.960857437  |
| O | -0.029170377 | 11.792379612 | 8.873981419  |
| O | 8.437975711  | 13.093540397 | 1.489273178  |
| O | 8.435343531  | 13.090453206 | 4.444924645  |
| O | 10.968834299 | 13.108325552 | 1.486996927  |
| O | 10.968984060 | 13.111057339 | 4.443318304  |

|   |              |              |              |
|---|--------------|--------------|--------------|
| O | 1.957130693  | 13.087680342 | 1.485107503  |
| O | 1.957476584  | 13.089685606 | 4.441687475  |
| O | 4.488180476  | 13.112830429 | 1.486970192  |
| O | 4.491737588  | 13.107607244 | 4.442651706  |
| O | 1.957618942  | 13.089362706 | 7.396949630  |
| O | 1.956859487  | 13.086333023 | 10.355755696 |
| O | 4.492888136  | 13.106573894 | 7.397094779  |
| O | 4.488388426  | 13.105248363 | 10.353011347 |
| O | 8.434106218  | 13.087438168 | 7.398537635  |
| O | 8.438341605  | 13.085585067 | 10.354230742 |
| O | 10.968918856 | 13.109996486 | 7.399104983  |
| O | 10.968808971 | 13.106664977 | 10.358128122 |
| O | -0.030908798 | 14.402123586 | 2.968508113  |
| O | -0.030732800 | 14.401480644 | 5.926117378  |
| O | -0.031397826 | 14.400488728 | 8.884330545  |
| O | -0.030776572 | 14.401159531 | 0.011869584  |
| O | 6.460197113  | 14.426805040 | 2.975580676  |
| O | 6.463350144  | 14.408319042 | 5.916706695  |
| O | 6.460979298  | 14.388212474 | 8.870000641  |
| O | 6.466369520  | 14.393490310 | -0.000568649 |
| O | 9.686971185  | 15.103688528 | 8.881331268  |
| O | 3.187206551  | 15.103825689 | 8.881419280  |

|   |              |              |              |
|---|--------------|--------------|--------------|
| O | 9.675958501  | 15.110410482 | 5.920026909  |
| O | 9.676663144  | 15.110794103 | 2.971068275  |
| O | 3.197944912  | 15.108054458 | 2.971194970  |
| O | 9.688123422  | 15.104263603 | 0.011957715  |
| O | 3.182754770  | 15.103046301 | 0.012132556  |
| O | 3.197192081  | 15.107319719 | 5.920358492  |
| O | 1.228025706  | 16.465619790 | 10.361505000 |
| O | 5.163304918  | 16.482861696 | 4.442999496  |
| O | 5.157127056  | 16.423958965 | 7.397527624  |
| O | 7.721094354  | 16.449545180 | 1.473853176  |
| O | 7.714556442  | 16.492709060 | 4.437460286  |
| O | 5.153644369  | 16.411388029 | 10.362641351 |
| O | 11.646360111 | 16.456597535 | 1.490982200  |
| O | 11.646521172 | 16.453221377 | 4.450777576  |
| O | 1.228845170  | 16.467332515 | 4.448743713  |
| O | 1.229437849  | 16.471495561 | 1.492461965  |
| O | 5.156187056  | 16.434000640 | 1.470033044  |
| O | 7.717335655  | 16.435556916 | 7.404783072  |
| O | 7.720113700  | 16.425562390 | 10.356952733 |
| O | 1.227909716  | 16.462122545 | 7.405126131  |
| O | 11.645338022 | 16.450787129 | 7.405148489  |
| O | 11.645735220 | 16.453400686 | 10.362858898 |

|   |              |              |              |
|---|--------------|--------------|--------------|
| O | 3.205463868  | 17.731750978 | 8.881881581  |
| O | 3.207898489  | 17.727785458 | 0.007140110  |
| O | 9.676732244  | 17.734316315 | 2.969200263  |
| O | 9.670419687  | 17.735493255 | 5.936784602  |
| O | 3.203898588  | 17.731244840 | 2.968682836  |
| O | 3.195483144  | 17.729877875 | 5.933332488  |
| O | 9.664267672  | 17.731742406 | 8.882062574  |
| O | 9.661317916  | 17.731011238 | 0.005250686  |
| O | 6.432323407  | 18.520509508 | -0.045873533 |
| O | 6.450806470  | 18.559192085 | 6.009336248  |
| O | -0.069214458 | 18.499532469 | 0.010015531  |
| O | 6.423085383  | 18.487748422 | 2.811669856  |
| O | -0.068382915 | 18.506334790 | 5.934128502  |
| O | 6.421332155  | 18.422410560 | 8.934977558  |
| O | -0.069943259 | 18.501832413 | 8.881289037  |
| O | -0.075315687 | 18.503553711 | 2.985081619  |
| O | 1.971888567  | 19.939633277 | 4.457346790  |
| O | 4.393096225  | 19.964793722 | 1.494558998  |
| O | 4.452436987  | 19.895284956 | 4.474303811  |
| O | 1.979453504  | 19.940779499 | 7.413986028  |
| O | 1.962345566  | 19.919021643 | 10.358307932 |
| O | 4.470020705  | 19.941654256 | 7.402209070  |

|   |              |              |              |
|---|--------------|--------------|--------------|
| O | 4.424467554  | 19.954552735 | 10.361404448 |
| O | 8.452414061  | 19.953944441 | 1.501376160  |
| O | 8.400457043  | 19.896956604 | 4.467991774  |
| O | 10.896987401 | 19.910764130 | 1.492203252  |
| O | 10.875910215 | 19.952944310 | 4.465764142  |
| O | 8.385107658  | 19.990040250 | 7.411944594  |
| O | 8.428788343  | 19.981917756 | 10.354197974 |
| O | 10.872037475 | 19.945264730 | 7.412703226  |
| O | 10.887808216 | 19.925034932 | 10.362011543 |
| O | 1.947811359  | 19.891989166 | 1.497762927  |
| O | -0.064631749 | 21.105999941 | 0.013453449  |
| O | 6.427286870  | 21.288728211 | 2.977598924  |
| O | -0.067934801 | 21.108088073 | 2.973152059  |
| O | -0.064978940 | 21.111428868 | 5.933864110  |
| O | -0.069274985 | 21.109182145 | 8.886706757  |
| O | 6.407406863  | 21.156636231 | 8.844352767  |
| O | 6.435650489  | 21.190441025 | 0.042293659  |
| H | 0.000000000  | 0.932899949  | 9.814800036  |
| H | 0.816399984  | 0.932899949  | 8.400899982  |
| H | 6.457700016  | 0.932899949  | 6.856699960  |
| H | 0.834099951  | 0.932899949  | -0.439200043 |
| H | 0.000000000  | 0.932899949  | 3.900000036  |

|   |              |              |              |
|---|--------------|--------------|--------------|
| H | 0.816399984  | 0.932899949  | 2.486099982  |
| H | 6.457700016  | 0.932899949  | 0.941899960  |
| H | 0.834099951  | 0.932899949  | 5.475599957  |
| H | 6.494400000  | 0.932899949  | 9.814800036  |
| H | 7.310799984  | 0.932899949  | 8.400899982  |
| H | -0.036699984 | 0.932899949  | 6.856699960  |
| H | 7.328499951  | 0.932899949  | -0.439200043 |
| H | 6.494400000  | 0.932899949  | 3.900000036  |
| H | 7.310799984  | 0.932899949  | 2.486099982  |
| H | -0.036699984 | 0.932899949  | 0.941899960  |
| H | 7.328499951  | 0.932899949  | 5.475599957  |
| H | 7.163288000  | 21.770244628 | 8.802819396  |
| H | 6.436448261  | 21.297796545 | 4.372955370  |

8-a:

|    |             |             |              |
|----|-------------|-------------|--------------|
| Ti | 3.247200000 | 3.247194072 | 1.478700000  |
| Ti | 3.247200000 | 3.247194072 | 4.436100000  |
| Ti | 0.000000000 | 3.247194072 | 2.957400000  |
| Ti | 0.000000000 | 3.247194072 | 0.000000000  |
| Ti | 3.247200000 | 3.247194072 | 7.393500000  |
| Ti | 3.247200000 | 3.247194072 | 10.350900000 |
| Ti | 0.000000000 | 3.247194072 | 8.872200000  |
| Ti | 0.000000000 | 3.247194072 | 5.914800000  |

|    |             |             |              |
|----|-------------|-------------|--------------|
| Ti | 9.741600000 | 3.247194072 | 1.478700000  |
| Ti | 9.741600000 | 3.247194072 | 4.436100000  |
| Ti | 6.494400000 | 3.247194072 | 2.957400000  |
| Ti | 6.494400000 | 3.247194072 | 0.000000000  |
| Ti | 9.741600000 | 3.247194072 | 7.393500000  |
| Ti | 9.741600000 | 3.247194072 | 10.350900000 |
| Ti | 6.494400000 | 3.247194072 | 8.872200000  |
| Ti | 6.494400000 | 3.247194072 | 5.914800000  |
| Ti | 0.000000000 | 6.494391717 | 4.436100000  |
| Ti | 0.000000000 | 6.494391717 | 1.478700000  |
| Ti | 3.247200000 | 6.494391717 | 2.957400000  |
| Ti | 3.247200000 | 6.494391717 | 0.000000000  |
| Ti | 0.000000000 | 6.494391717 | 10.350900000 |
| Ti | 0.000000000 | 6.494391717 | 7.393500000  |
| Ti | 3.247200000 | 6.494391717 | 8.872200000  |
| Ti | 3.247200000 | 6.494391717 | 5.914800000  |
| Ti | 6.494400000 | 6.494391717 | 4.436100000  |
| Ti | 6.494400000 | 6.494391717 | 1.478700000  |
| Ti | 9.741600000 | 6.494391717 | 2.957400000  |
| Ti | 9.741600000 | 6.494391717 | 0.000000000  |
| Ti | 6.494400000 | 6.494391717 | 10.350900000 |
| Ti | 6.494400000 | 6.494391717 | 7.393500000  |

|    |              |              |              |
|----|--------------|--------------|--------------|
| Ti | 9.741600000  | 6.494391717  | 8.872200000  |
| Ti | 9.741600000  | 6.494391717  | 5.914800000  |
| Ti | 3.227644582  | 9.738467522  | 1.478772042  |
| Ti | 3.227113730  | 9.738600397  | 4.436731109  |
| Ti | -0.012067894 | 9.837590890  | 2.962107234  |
| Ti | -0.013660191 | 9.838363492  | 0.004816303  |
| Ti | 3.226260236  | 9.738794708  | 7.393936985  |
| Ti | 3.227182830  | 9.739282987  | 10.350911830 |
| Ti | -0.016474604 | 9.835558123  | 8.879569486  |
| Ti | -0.011503271 | 9.836402877  | 5.921320002  |
| Ti | 9.738114196  | 9.739261555  | 1.481611028  |
| Ti | 9.740810930  | 9.740200964  | 4.438933781  |
| Ti | 6.483054153  | 9.745563097  | 2.971867719  |
| Ti | 6.481470039  | 9.736621209  | 0.012677073  |
| Ti | 9.736812328  | 9.739070101  | 7.395496600  |
| Ti | 9.732058168  | 9.738816854  | 10.352817815 |
| Ti | 6.478832534  | 9.745420578  | 8.879994878  |
| Ti | 6.482766192  | 9.753453775  | 5.925236783  |
| Ti | -0.027662767 | 13.174147406 | 1.509345880  |
| Ti | -0.027844220 | 13.181136181 | 4.466082003  |
| Ti | 3.216300164  | 12.994781363 | 2.961994972  |
| Ti | 3.214344051  | 12.996719832 | 5.919293828  |



|    |              |              |              |
|----|--------------|--------------|--------------|
| Ti | 6.468308618  | 13.021069099 | 1.503876583  |
| Ti | 6.463934380  | 13.087313509 | 4.464214937  |
| Ti | 9.716160656  | 12.997319553 | 2.966436631  |
| Ti | 9.714619924  | 12.997247758 | 5.923201737  |
| Ti | -0.029464184 | 13.170430490 | 7.423846709  |
| Ti | -0.026447665 | 13.181023666 | 10.380813746 |
| Ti | 3.216849331  | 12.996343354 | 8.876898954  |
| Ti | 3.218089891  | 12.996093321 | 0.006039957  |
| Ti | 6.464474844  | 13.091265456 | 7.376249131  |
| Ti | 6.465558629  | 13.016079159 | 10.336075027 |
| Ti | 9.715930884  | 12.995326435 | 8.880880324  |
| Ti | 9.715032319  | 12.996199406 | 0.008403630  |
| Ti | 9.704617509  | 16.322423852 | 1.485292754  |
| Ti | 9.709223987  | 16.322556369 | 4.441473832  |
| Ti | 6.451846873  | 16.314482452 | 2.976683668  |
| Ti | -0.050945321 | 16.637439843 | 5.920230614  |
| Ti | 3.197946600  | 16.317879684 | 1.483242685  |
| Ti | 3.180183767  | 16.316019797 | 4.441550015  |
| Ti | -0.047750855 | 16.640733489 | 2.958123025  |
| Ti | 6.443936564  | 16.413206125 | 5.921949219  |
| Ti | 3.181968038  | 16.321025097 | 7.397507632  |
| Ti | 3.197489135  | 16.321699114 | 10.354260198 |

|    |              |              |              |
|----|--------------|--------------|--------------|
| Ti | -0.046211553 | 16.633481466 | 8.882255160  |
| Ti | 6.450053769  | 16.269199366 | 0.006380295  |
| Ti | 9.709467917  | 16.312783658 | 7.397991108  |
| Ti | 9.705071987  | 16.318591206 | 10.357003482 |
| Ti | 6.449551752  | 16.313729854 | 8.867651874  |
| Ti | -0.043398438 | 16.639318304 | 0.005829982  |
| Ti | 6.418042741  | 19.944601429 | 7.293858806  |
| Ti | 6.426016826  | 19.562825247 | 10.199383526 |
| Ti | 3.193889029  | 19.575390468 | 8.883308231  |
| Ti | 3.217260816  | 19.572197191 | 0.010293290  |
| Ti | 6.448829575  | 19.560062742 | 1.649685393  |
| Ti | 6.452796614  | 19.939845805 | 4.556649066  |
| Ti | 3.194595880  | 19.567104023 | 2.963952652  |
| Ti | 3.200826607  | 19.574715379 | 5.916995455  |
| Ti | -0.057190206 | 20.005761957 | 1.478982254  |
| Ti | -0.067889470 | 20.000738083 | 4.439049947  |
| Ti | 9.678374808  | 19.576417745 | 2.960594702  |
| Ti | 9.673139932  | 19.574142447 | 5.927288627  |
| Ti | -0.053502945 | 19.997057243 | 7.395059260  |
| Ti | -0.055440744 | 20.002796567 | 10.353697346 |
| Ti | 9.681752935  | 19.564367949 | 8.879783838  |
| Ti | 9.663658627  | 19.573631665 | 0.005275883  |

|   |             |             |              |
|---|-------------|-------------|--------------|
| O | 0.000000000 | 1.266694833 | 2.957400000  |
| O | 0.000000000 | 1.266694833 | 0.000000000  |
| O | 0.000000000 | 1.266694833 | 8.872200000  |
| O | 0.000000000 | 1.266694833 | 5.914800000  |
| O | 6.494400000 | 1.266694833 | 2.957400000  |
| O | 6.494400000 | 1.266694833 | 0.000000000  |
| O | 6.494400000 | 1.266694833 | 8.872200000  |
| O | 6.494400000 | 1.266694833 | 5.914800000  |
| O | 9.741600000 | 1.980495667 | 8.872200000  |
| O | 9.741600000 | 1.980495667 | 5.914800000  |
| O | 9.741600000 | 1.980495667 | 2.957400000  |
| O | 9.741600000 | 1.980495667 | 0.000000000  |
| O | 3.247200000 | 1.980495667 | 8.872200000  |
| O | 3.247200000 | 1.980495667 | 5.914800000  |
| O | 3.247200000 | 1.980495667 | 2.957400000  |
| O | 3.247200000 | 1.980495667 | 0.000000000  |
| O | 1.266698949 | 3.247194072 | 1.478700000  |
| O | 1.266698949 | 3.247194072 | 4.436100000  |
| O | 5.227599738 | 3.247194072 | 1.478700000  |
| O | 5.227599738 | 3.247194072 | 4.436100000  |
| O | 1.266698949 | 3.247194072 | 7.393500000  |
| O | 1.266698949 | 3.247194072 | 10.350900000 |

|   |              |             |              |
|---|--------------|-------------|--------------|
| O | 5.227599738  | 3.247194072 | 7.393500000  |
| O | 5.227599738  | 3.247194072 | 10.350900000 |
| O | 7.761098949  | 3.247194072 | 1.478700000  |
| O | 7.761098949  | 3.247194072 | 4.436100000  |
| O | 11.721999738 | 3.247194072 | 1.478700000  |
| O | 11.721999738 | 3.247194072 | 4.436100000  |
| O | 7.761098949  | 3.247194072 | 7.393500000  |
| O | 7.761098949  | 3.247194072 | 10.350900000 |
| O | 11.721999738 | 3.247194072 | 7.393500000  |
| O | 11.721999738 | 3.247194072 | 10.350900000 |
| O | 9.741600000  | 4.513896049 | 8.872200000  |
| O | 9.741600000  | 4.513896049 | 5.914800000  |
| O | 9.741600000  | 4.513896049 | 2.957400000  |
| O | 9.741600000  | 4.513896049 | 0.000000000  |
| O | 3.247200000  | 4.513896049 | 8.872200000  |
| O | 3.247200000  | 4.513896049 | 5.914800000  |
| O | 3.247200000  | 4.513896049 | 2.957400000  |
| O | 3.247200000  | 4.513896049 | 0.000000000  |
| O | 0.000000000  | 5.227596870 | 2.957400000  |
| O | 0.000000000  | 5.227596870 | 0.000000000  |
| O | 0.000000000  | 5.227596870 | 8.872200000  |
| O | 0.000000000  | 5.227596870 | 5.914800000  |

|   |              |             |              |
|---|--------------|-------------|--------------|
| O | 6.494400000  | 5.227596870 | 0.000000000  |
| O | 6.494400000  | 5.227596870 | 2.957400000  |
| O | 6.494400000  | 5.227596870 | 8.872200000  |
| O | 6.494400000  | 5.227596870 | 5.914800000  |
| O | 8.474899752  | 6.494391717 | 7.393500000  |
| O | 11.008298949 | 6.494391717 | 7.393500000  |
| O | 8.474899752  | 6.494391717 | 10.350900000 |
| O | 11.008298949 | 6.494391717 | 10.350900000 |
| O | 8.474899752  | 6.494391717 | 1.478700000  |
| O | 11.008298949 | 6.494391717 | 1.478700000  |
| O | 8.474899752  | 6.494391717 | 4.436100000  |
| O | 11.008298949 | 6.494391717 | 4.436100000  |
| O | 1.980499752  | 6.494391717 | 1.478700000  |
| O | 4.513898949  | 6.494391717 | 1.478700000  |
| O | 1.980499752  | 6.494391717 | 4.436100000  |
| O | 4.513898949  | 6.494391717 | 4.436100000  |
| O | 1.980499752  | 6.494391717 | 7.393500000  |
| O | 4.513898949  | 6.494391717 | 7.393500000  |
| O | 1.980499752  | 6.494391717 | 10.350900000 |
| O | 4.513898949  | 6.494391717 | 10.350900000 |
| O | 0.000000000  | 7.761086550 | 8.872200000  |
| O | 0.000000000  | 7.761086550 | 5.914800000  |

|   |             |             |              |
|---|-------------|-------------|--------------|
| O | 6.494400000 | 7.761086550 | 2.957400000  |
| O | 6.494400000 | 7.761086550 | 0.000000000  |
| O | 0.000000000 | 7.761086550 | 2.957400000  |
| O | 0.000000000 | 7.761086550 | 0.000000000  |
| O | 6.494400000 | 7.761086550 | 8.872200000  |
| O | 6.494400000 | 7.761086550 | 5.914800000  |
| O | 3.247200000 | 8.474887384 | 2.957400000  |
| O | 3.247200000 | 8.474887384 | 0.000000000  |
| O | 3.247200000 | 8.474887384 | 8.872200000  |
| O | 3.247200000 | 8.474887384 | 5.914800000  |
| O | 9.741600000 | 8.474887384 | 2.957400000  |
| O | 9.741600000 | 8.474887384 | 0.000000000  |
| O | 9.741600000 | 8.474887384 | 8.872200000  |
| O | 9.741600000 | 8.474887384 | 5.914800000  |
| O | 1.269827821 | 9.787250354 | 1.480745929  |
| O | 1.270008365 | 9.788247271 | 4.438590841  |
| O | 5.211896928 | 9.774082554 | 1.484021309  |
| O | 5.211520903 | 9.773095282 | 4.441336372  |
| O | 1.269381656 | 9.788195478 | 7.396494663  |
| O | 1.269247741 | 9.787573254 | 10.352610205 |
| O | 5.210634417 | 9.772855250 | 7.397313153  |
| O | 5.211103702 | 9.774624411 | 10.356356166 |

|   |              |              |              |
|---|--------------|--------------|--------------|
| O | 7.759835269  | 9.782221837  | 1.483560783  |
| O | 7.760095305  | 9.781020965  | 4.441460702  |
| O | 11.701382746 | 9.779766157  | 1.481241826  |
| O | 11.701697335 | 9.781247780  | 4.438831810  |
| O | 7.759278439  | 9.780550546  | 7.398323993  |
| O | 7.758863057  | 9.782407576  | 10.355200651 |
| O | 11.700663816 | 9.780825582  | 7.395291356  |
| O | 11.700103349 | 9.780188356  | 10.353469507 |
| O | 9.725401278  | 11.073878518 | 2.959644903  |
| O | 9.725786915  | 11.073733499 | 0.002521006  |
| O | 3.244362727  | 11.072888745 | 2.959118131  |
| O | 3.243967607  | 11.073078770 | 0.001999321  |
| O | 3.244381430  | 11.073369880 | 8.873931972  |
| O | 3.244519891  | 11.073532401 | 5.916295616  |
| O | 9.724893286  | 11.073002689 | 8.874594311  |
| O | 9.723615188  | 11.074316433 | 5.917316511  |
| O | 6.465775412  | 11.792286028 | 8.867184604  |
| O | -0.026139440 | 11.798877965 | 2.956842826  |
| O | 6.466614749  | 11.790206826 | 0.006143584  |
| O | 6.466951418  | 11.800931806 | 5.919952501  |
| O | -0.026010981 | 11.798820100 | 0.000049684  |
| O | -0.026576773 | 11.799866309 | 5.915263011  |

|   |              |              |              |
|---|--------------|--------------|--------------|
| O | 6.466664626  | 11.793145426 | 2.971654786  |
| O | -0.026922925 | 11.799066561 | 8.871612187  |
| O | 8.434812678  | 13.093926519 | 1.483973399  |
| O | 8.436863870  | 13.099250433 | 4.440388230  |
| O | 10.970926015 | 13.117603199 | 1.483418591  |
| O | 10.971227485 | 13.114837121 | 4.440551478  |
| O | 1.962180998  | 13.100228775 | 1.482092256  |
| O | 1.961033957  | 13.098207796 | 4.438724042  |
| O | 4.498930656  | 13.110103286 | 1.482825336  |
| O | 4.495733073  | 13.117059913 | 4.438978378  |
| O | 1.961255286  | 13.098374960 | 7.397763979  |
| O | 1.962361412  | 13.100715268 | 10.355174744 |
| O | 4.495456672  | 13.116867031 | 7.397944026  |
| O | 4.498424353  | 13.109824320 | 10.355246550 |
| O | 8.436961416  | 13.099575832 | 7.399942518  |
| O | 8.434253251  | 13.092666354 | 10.357003246 |
| O | 10.970699750 | 13.115820822 | 7.398520601  |
| O | 10.971195663 | 13.117146710 | 10.356961250 |
| O | -0.027090610 | 14.409770304 | 2.966052169  |
| O | -0.027264400 | 14.410719000 | 5.923670899  |
| O | -0.026369342 | 14.410421104 | 8.880182496  |
| O | -0.025656907 | 14.409212731 | 0.009654137  |



|   |              |              |              |
|---|--------------|--------------|--------------|
| O | 6.468705816  | 14.409622070 | 2.953495759  |
| O | 6.466727881  | 14.432690812 | 5.920562080  |
| O | 6.467571763  | 14.408877330 | 8.888791369  |
| O | 6.467123390  | 14.403654858 | 0.005492602  |
| O | 9.684821799  | 15.113386229 | 8.881762457  |
| O | 3.206499076  | 15.116775603 | 8.878861366  |
| O | 9.694119831  | 15.114319209 | 5.918961062  |
| O | 9.684850894  | 15.117452835 | 2.962400254  |
| O | 3.205957962  | 15.113831288 | 2.960789772  |
| O | 9.681751246  | 15.116817751 | 0.007556985  |
| O | 3.211266225  | 15.115961210 | 0.004828724  |
| O | 3.194688100  | 15.114674970 | 5.920738932  |
| O | 1.243948416  | 16.474004105 | 10.359790772 |
| O | 5.166857225  | 16.436582407 | 4.446437769  |
| O | 5.165329223  | 16.438644464 | 7.396181889  |
| O | 7.724977876  | 16.479731285 | 1.481687565  |
| O | 7.730346147  | 16.456668615 | 4.449008933  |
| O | 5.173942616  | 16.464380342 | 10.361583430 |
| O | 11.656067810 | 16.461659270 | 1.482452822  |
| O | 11.655676328 | 16.466449899 | 4.440520248  |
| O | 1.240026708  | 16.481155401 | 4.440131291  |
| O | 1.243521734  | 16.477429197 | 1.484893624  |

|   |              |              |              |
|---|--------------|--------------|--------------|
| O | 5.176119539  | 16.463697395 | 1.483245051  |
| O | 7.728921925  | 16.453515701 | 7.395929327  |
| O | 7.723391164  | 16.478490051 | 10.359989155 |
| O | 1.240495474  | 16.479604483 | 7.399106284  |
| O | 11.654928692 | 16.466362031 | 7.402579336  |
| O | 11.655398627 | 16.460936676 | 10.358993339 |
| O | 3.218177046  | 17.749565459 | 8.880470428  |
| O | 3.222390613  | 17.750564162 | 0.009815137  |
| O | 9.681780082  | 17.750354491 | 2.962147337  |
| O | 9.670121984  | 17.750313772 | 5.925411269  |
| O | 3.228056457  | 17.744707679 | 2.961999940  |
| O | 3.231095447  | 17.750868845 | 5.917620768  |
| O | 9.672121220  | 17.742295934 | 8.881063801  |
| O | 9.680113099  | 17.750698465 | 0.003325537  |
| O | 6.434032214  | 18.626424838 | 0.008550908  |
| O | 6.433220414  | 18.573488247 | 5.926274002  |
| O | -0.057642996 | 18.515834251 | 0.008211990  |
| O | 6.438834173  | 18.458116318 | 3.057252589  |
| O | -0.061394031 | 18.509521280 | 5.920496780  |
| O | 6.428680828  | 18.460196234 | 8.791983009  |
| O | -0.054800267 | 18.509388405 | 8.890086828  |
| O | -0.065746578 | 18.514954850 | 2.954412435  |

|   |              |              |              |
|---|--------------|--------------|--------------|
| O | 1.974934831  | 19.922054898 | 4.439280033  |
| O | 4.508300387  | 20.000453760 | 1.474620562  |
| O | 4.449496322  | 20.018365040 | 4.420523729  |
| O | 1.978816923  | 19.930397422 | 7.399045953  |
| O | 1.998670174  | 19.963521770 | 10.369044122 |
| O | 4.450260194  | 19.989465175 | 7.422286267  |
| O | 4.504666770  | 19.961624378 | 10.368836276 |
| O | 8.370978831  | 19.951654498 | 1.475970793  |
| O | 8.421095986  | 19.973236973 | 4.423820757  |
| O | 10.876031401 | 19.975350465 | 1.475852497  |
| O | 10.890119833 | 19.948882348 | 4.445233279  |
| O | 8.425163948  | 20.006276667 | 7.427923071  |
| O | 8.369656701  | 19.992003365 | 10.372213982 |
| O | 10.898130935 | 19.931050365 | 7.404953419  |
| O | 10.878224560 | 19.966412863 | 10.362621714 |
| O | 1.997712120  | 19.959089045 | 1.480806852  |
| O | 6.450381606  | 21.168345268 | 2.871255433  |
| O | 6.442638983  | 21.176837454 | 5.923361200  |
| O | -0.054711683 | 21.113988847 | 2.960018245  |
| O | -0.054820529 | 21.110968094 | 5.920091143  |
| O | -0.053524767 | 21.111030245 | 8.876232001  |
| O | -0.052714915 | 21.117034961 | 0.003120412  |

|   |              |              |              |
|---|--------------|--------------|--------------|
| O | 6.430217144  | 21.171253864 | 8.979490687  |
| H | 0.000000000  | 0.932897449  | 9.814799089  |
| H | 0.816399334  | 0.932897449  | 8.400899272  |
| H | 6.457698847  | 0.932897449  | 6.856699960  |
| H | 0.834099172  | 0.932897449  | -0.439201108 |
| H | 0.000000000  | 0.932897449  | 3.899999089  |
| H | 0.816399334  | 0.932897449  | 2.486099272  |
| H | 6.457698847  | 0.932897449  | 0.941899960  |
| H | 0.834099172  | 0.932897449  | 5.475598892  |
| H | 6.494400000  | 0.932897449  | 9.814799089  |
| H | 7.310799334  | 0.932897449  | 8.400899272  |
| H | -0.036701153 | 0.932897449  | 6.856699960  |
| H | 7.328499172  | 0.932897449  | -0.439201108 |
| H | 6.494400000  | 0.932897449  | 3.899999089  |
| H | 7.310799334  | 0.932897449  | 2.486099272  |
| H | -0.036701153 | 0.932897449  | 0.941899960  |
| H | 7.328499172  | 0.932897449  | 5.475598892  |
| H | 5.622753844  | 21.679853835 | 2.836050544  |
| H | 7.259705292  | 21.682054481 | 9.015467221  |

TS8-1:

|    |             |             |             |
|----|-------------|-------------|-------------|
| Ti | 3.247200000 | 3.247190143 | 1.478700000 |
| Ti | 3.247200000 | 3.247190143 | 4.436100000 |

|    |             |             |              |
|----|-------------|-------------|--------------|
| Ti | 0.000000000 | 3.247190143 | 2.957400000  |
| Ti | 0.000000000 | 3.247190143 | 0.000000000  |
| Ti | 3.247200000 | 3.247190143 | 7.393500000  |
| Ti | 3.247200000 | 3.247190143 | 10.350900000 |
| Ti | 0.000000000 | 3.247190143 | 8.872200000  |
| Ti | 0.000000000 | 3.247190143 | 5.914800000  |
| Ti | 9.741600000 | 3.247190143 | 1.478700000  |
| Ti | 9.741600000 | 3.247190143 | 4.436100000  |
| Ti | 6.494400000 | 3.247190143 | 2.957400000  |
| Ti | 6.494400000 | 3.247190143 | 0.000000000  |
| Ti | 9.741600000 | 3.247190143 | 7.393500000  |
| Ti | 9.741600000 | 3.247190143 | 10.350900000 |
| Ti | 6.494400000 | 3.247190143 | 8.872200000  |
| Ti | 6.494400000 | 3.247190143 | 5.914800000  |
| Ti | 0.000000000 | 6.494389931 | 4.436100000  |
| Ti | 0.000000000 | 6.494389931 | 1.478700000  |
| Ti | 3.247200000 | 6.494389931 | 2.957400000  |
| Ti | 3.247200000 | 6.494389931 | 0.000000000  |
| Ti | 0.000000000 | 6.494389931 | 10.350900000 |
| Ti | 0.000000000 | 6.494389931 | 7.393500000  |
| Ti | 3.247200000 | 6.494389931 | 8.872200000  |
| Ti | 3.247200000 | 6.494389931 | 5.914800000  |

|    |              |             |              |
|----|--------------|-------------|--------------|
| Ti | 6.494400000  | 6.494389931 | 4.436100000  |
| Ti | 6.494400000  | 6.494389931 | 1.478700000  |
| Ti | 9.741600000  | 6.494389931 | 2.957400000  |
| Ti | 9.741600000  | 6.494389931 | 0.000000000  |
| Ti | 6.494400000  | 6.494389931 | 10.350900000 |
| Ti | 6.494400000  | 6.494389931 | 7.393500000  |
| Ti | 9.741600000  | 6.494389931 | 8.872200000  |
| Ti | 9.741600000  | 6.494389931 | 5.914800000  |
| Ti | 3.227584574  | 9.739588741 | 1.478382139  |
| Ti | 3.229605891  | 9.737897448 | 4.435995663  |
| Ti | -0.012155568 | 9.837080823 | 2.958156503  |
| Ti | -0.015919073 | 9.836974738 | 0.003500734  |
| Ti | 3.226342975  | 9.737462033 | 7.393554534  |
| Ti | 3.226028516  | 9.738396442 | 10.351751849 |
| Ti | -0.015096233 | 9.835830302 | 8.876666857  |
| Ti | -0.008267891 | 9.837588390 | 5.916764305  |
| Ti | 9.732885295  | 9.740306692 | 1.480180001  |
| Ti | 9.741950957  | 9.738237849 | 4.436970659  |
| Ti | 6.481343139  | 9.733865133 | 2.971562397  |
| Ti | 6.479367542  | 9.741388263 | 0.008234703  |
| Ti | 9.741698195  | 9.736591919 | 7.396277117  |
| Ti | 9.732239881  | 9.739327278 | 10.353868520 |

|    |              |              |              |
|----|--------------|--------------|--------------|
| Ti | 6.478495864  | 9.748259522  | 8.875483779  |
| Ti | 6.488606606  | 9.759671020  | 5.927370251  |
| Ti | -0.027047487 | 13.175829055 | 1.506607328  |
| Ti | -0.027928128 | 13.178332955 | 4.464568642  |
| Ti | 3.217340437  | 12.995427877 | 2.962649976  |
| Ti | 3.215199364  | 12.995244638 | 5.918732987  |
| Ti | 6.466847768  | 12.994663848 | 1.500652544  |
| Ti | 6.465584607  | 13.046911777 | 4.481125705  |
| Ti | 9.715614477  | 12.997979640 | 2.966037737  |
| Ti | 9.714489127  | 12.995175701 | 5.922784034  |
| Ti | -0.026966437 | 13.173396950 | 7.424357038  |
| Ti | -0.025476232 | 13.178531196 | 10.380259529 |
| Ti | 3.218591129  | 12.994747430 | 8.878993266  |
| Ti | 3.218085865  | 12.997921061 | 0.005802064  |
| Ti | 6.466118577  | 13.145677598 | 7.391827886  |
| Ti | 6.468338622  | 13.022208177 | 10.309525974 |
| Ti | 9.717746588  | 12.995999023 | 8.882511626  |
| Ti | 9.715513554  | 12.998903690 | 0.008505837  |
| Ti | 9.706709615  | 16.325790365 | 1.479620225  |
| Ti | 9.697451848  | 16.324498410 | 4.433760460  |
| Ti | 6.452070280  | 16.270096984 | 2.957397989  |
| Ti | -0.046565497 | 16.629404502 | 5.913635258  |

|    |              |              |              |
|----|--------------|--------------|--------------|
| Ti | 3.193759790  | 16.318893031 | 1.480241279  |
| Ti | 3.199352118  | 16.318632997 | 4.438187924  |
| Ti | -0.046290135 | 16.637941694 | 2.962192644  |
| Ti | 6.447713187  | 16.404123861 | 5.939564440  |
| Ti | 3.180819698  | 16.304016793 | 7.404650463  |
| Ti | 3.197359636  | 16.333969296 | 10.358264872 |
| Ti | -0.044112692 | 16.638294598 | 8.878233096  |
| Ti | 6.452494624  | 16.223650530 | 0.005453091  |
| Ti | 9.716895562  | 16.301435383 | 7.397525258  |
| Ti | 9.705140438  | 16.333739266 | 10.357511209 |
| Ti | 6.451715686  | 16.401402433 | 8.872443335  |
| Ti | -0.044620035 | 16.641546453 | 0.003877506  |
| Ti | 6.427893447  | 20.080612496 | 7.190487976  |
| Ti | 6.427664325  | 19.651176129 | 10.179792644 |
| Ti | 3.216368485  | 19.582562123 | 8.878296621  |
| Ti | 3.224932781  | 19.587654220 | 0.004451597  |
| Ti | 6.440449850  | 19.865343883 | 1.732466450  |
| Ti | 6.445404298  | 19.477542625 | 4.461519918  |
| Ti | 3.200479027  | 19.567826618 | 2.955560142  |
| Ti | 3.182296785  | 19.545764793 | 5.920897094  |
| Ti | -0.056582330 | 19.998972137 | 1.475934121  |
| Ti | -0.055958478 | 20.005260105 | 4.438747228  |



|    |              |              |              |
|----|--------------|--------------|--------------|
| Ti | 9.688499058  | 19.575375466 | 2.951294980  |
| Ti | 9.694605353  | 19.550116793 | 5.922230882  |
| Ti | -0.049072985 | 19.997008665 | 7.400317044  |
| Ti | -0.053429169 | 19.999425054 | 10.354037328 |
| Ti | 9.674075645  | 19.579062021 | 8.873216636  |
| Ti | 9.640572984  | 19.595045548 | -0.001260562 |
| O  | 0.000000000  | 1.266689833  | 2.957400000  |
| O  | 0.000000000  | 1.266689833  | 0.000000000  |
| O  | 0.000000000  | 1.266689833  | 8.872200000  |
| O  | 0.000000000  | 1.266689833  | 5.914800000  |
| O  | 6.494400000  | 1.266689833  | 2.957400000  |
| O  | 6.494400000  | 1.266689833  | 0.000000000  |
| O  | 6.494400000  | 1.266689833  | 8.872200000  |
| O  | 6.494400000  | 1.266689833  | 5.914800000  |
| O  | 9.741600000  | 1.980499953  | 8.872200000  |
| O  | 9.741600000  | 1.980499953  | 5.914800000  |
| O  | 9.741600000  | 1.980499953  | 2.957400000  |
| O  | 9.741600000  | 1.980499953  | 0.000000000  |
| O  | 3.247200000  | 1.980499953  | 8.872200000  |
| O  | 3.247200000  | 1.980499953  | 5.914800000  |
| O  | 3.247200000  | 1.980499953  | 2.957400000  |
| O  | 3.247200000  | 1.980499953  | 0.000000000  |

|   |              |             |              |
|---|--------------|-------------|--------------|
| O | 1.266699988  | 3.247190143 | 1.478700000  |
| O | 1.266699988  | 3.247190143 | 4.436100000  |
| O | 5.227599998  | 3.247190143 | 1.478700000  |
| O | 5.227599998  | 3.247190143 | 4.436100000  |
| O | 1.266699988  | 3.247190143 | 7.393500000  |
| O | 1.266699988  | 3.247190143 | 10.350900000 |
| O | 5.227599998  | 3.247190143 | 7.393500000  |
| O | 5.227599998  | 3.247190143 | 10.350900000 |
| O | 7.761099988  | 3.247190143 | 1.478700000  |
| O | 7.761099988  | 3.247190143 | 4.436100000  |
| O | 11.721999998 | 3.247190143 | 1.478700000  |
| O | 11.721999998 | 3.247190143 | 4.436100000  |
| O | 7.761099988  | 3.247190143 | 7.393500000  |
| O | 7.761099988  | 3.247190143 | 10.350900000 |
| O | 11.721999998 | 3.247190143 | 7.393500000  |
| O | 11.721999998 | 3.247190143 | 10.350900000 |
| O | 9.741600000  | 4.513899978 | 8.872200000  |
| O | 9.741600000  | 4.513899978 | 5.914800000  |
| O | 9.741600000  | 4.513899978 | 2.957400000  |
| O | 9.741600000  | 4.513899978 | 0.000000000  |
| O | 3.247200000  | 4.513899978 | 8.872200000  |
| O | 3.247200000  | 4.513899978 | 5.914800000  |

|   |              |             |              |
|---|--------------|-------------|--------------|
| O | 3.247200000  | 4.513899978 | 2.957400000  |
| O | 3.247200000  | 4.513899978 | 0.000000000  |
| O | 0.000000000  | 5.227600085 | 2.957400000  |
| O | 0.000000000  | 5.227600085 | 0.000000000  |
| O | 0.000000000  | 5.227600085 | 8.872200000  |
| O | 0.000000000  | 5.227600085 | 5.914800000  |
| O | 6.494400000  | 5.227600085 | 0.000000000  |
| O | 6.494400000  | 5.227600085 | 2.957400000  |
| O | 6.494400000  | 5.227600085 | 8.872200000  |
| O | 6.494400000  | 5.227600085 | 5.914800000  |
| O | 8.474900012  | 6.494389931 | 7.393500000  |
| O | 11.008299988 | 6.494389931 | 7.393500000  |
| O | 8.474900012  | 6.494389931 | 10.350900000 |
| O | 11.008299988 | 6.494389931 | 10.350900000 |
| O | 8.474900012  | 6.494389931 | 1.478700000  |
| O | 11.008299988 | 6.494389931 | 1.478700000  |
| O | 8.474900012  | 6.494389931 | 4.436100000  |
| O | 11.008299988 | 6.494389931 | 4.436100000  |
| O | 1.980500012  | 6.494389931 | 1.478700000  |
| O | 4.513899988  | 6.494389931 | 1.478700000  |
| O | 1.980500012  | 6.494389931 | 4.436100000  |
| O | 4.513899988  | 6.494389931 | 4.436100000  |

|   |             |             |              |
|---|-------------|-------------|--------------|
| O | 1.980500012 | 6.494389931 | 7.393500000  |
| O | 4.513899988 | 6.494389931 | 7.393500000  |
| O | 1.980500012 | 6.494389931 | 10.350900000 |
| O | 4.513899988 | 6.494389931 | 10.350900000 |
| O | 0.000000000 | 7.761090122 | 8.872200000  |
| O | 0.000000000 | 7.761090122 | 5.914800000  |
| O | 6.494400000 | 7.761090122 | 2.957400000  |
| O | 6.494400000 | 7.761090122 | 0.000000000  |
| O | 0.000000000 | 7.761090122 | 2.957400000  |
| O | 0.000000000 | 7.761090122 | 0.000000000  |
| O | 6.494400000 | 7.761090122 | 8.872200000  |
| O | 6.494400000 | 7.761090122 | 5.914800000  |
| O | 3.247200000 | 8.474889884 | 2.957400000  |
| O | 3.247200000 | 8.474889884 | 0.000000000  |
| O | 3.247200000 | 8.474889884 | 8.872200000  |
| O | 3.247200000 | 8.474889884 | 5.914800000  |
| O | 9.741600000 | 8.474889884 | 2.957400000  |
| O | 9.741600000 | 8.474889884 | 0.000000000  |
| O | 9.741600000 | 8.474889884 | 8.872200000  |
| O | 9.741600000 | 8.474889884 | 5.914800000  |
| O | 1.269055247 | 9.785366535 | 1.479547946  |
| O | 1.271075525 | 9.787531462 | 4.436915533  |

|   |              |              |              |
|---|--------------|--------------|--------------|
| O | 5.210788724  | 9.769665903  | 1.483063111  |
| O | 5.212143975  | 9.776158184  | 4.442203127  |
| O | 1.270019796  | 9.786532045  | 7.395303304  |
| O | 1.269312685  | 9.787284287  | 10.351400392 |
| O | 5.211297236  | 9.768419668  | 7.396180942  |
| O | 5.210625845  | 9.776652534  | 10.353045653 |
| O | 7.758846951  | 9.777343697  | 1.482166546  |
| O | 7.760737601  | 9.783175533  | 4.439872105  |
| O | 11.700873065 | 9.778960695  | 1.480510757  |
| O | 11.701975944 | 9.781016679  | 4.438048927  |
| O | 7.761131421  | 9.775384868  | 7.398886963  |
| O | 7.758302201  | 9.783696316  | 10.352929250 |
| O | 11.701997766 | 9.779240374  | 7.393346215  |
| O | 11.699638610 | 9.780587337  | 10.351678151 |
| O | 9.725583770  | 11.073320230 | 2.958129650  |
| O | 9.725232423  | 11.073390954 | 0.003250774  |
| O | 3.243414154  | 11.072529055 | 2.957631269  |
| O | 3.242433240  | 11.072664073 | 0.003076287  |
| O | 3.246231945  | 11.073435960 | 8.871353474  |
| O | 3.244080740  | 11.073488467 | 5.918452626  |
| O | 9.724106684  | 11.074013536 | 8.871935254  |
| O | 9.724030830  | 11.073672062 | 5.919065635  |

|   |              |              |              |
|---|--------------|--------------|--------------|
| O | 6.466957133  | 11.796140462 | 8.852462904  |
| O | -0.025335564 | 11.798077145 | 2.956276425  |
| O | 6.467060135  | 11.784781471 | 0.005322374  |
| O | 6.469372531  | 11.797047724 | 5.943451646  |
| O | -0.025484805 | 11.797242393 | 0.000874562  |
| O | -0.024224502 | 11.798823672 | 5.914889195  |
| O | 6.466819322  | 11.778774612 | 2.962829432  |
| O | -0.026024490 | 11.797413844 | 8.869440864  |
| O | 8.433689926  | 13.096268970 | 1.482481687  |
| O | 8.437217425  | 13.086987037 | 4.438662883  |
| O | 10.970758589 | 13.116862030 | 1.482762285  |
| O | 10.971114612 | 13.115122516 | 4.439954320  |
| O | 1.963176849  | 13.102375486 | 1.482571000  |
| O | 1.962183596  | 13.100407727 | 4.438215842  |
| O | 4.500568674  | 13.111254508 | 1.481619664  |
| O | 4.496303541  | 13.100857429 | 4.438874396  |
| O | 1.963104502  | 13.101623244 | 7.398886727  |
| O | 1.962889537  | 13.095360993 | 10.354755740 |
| O | 4.496802571  | 13.131585034 | 7.397240520  |
| O | 4.498273812  | 13.099532612 | 10.358007815 |
| O | 8.437159105  | 13.116031921 | 7.399776904  |
| O | 8.436496027  | 13.084650659 | 10.357909629 |

|   |              |              |              |
|---|--------------|--------------|--------------|
| O | 10.971038628 | 13.116726655 | 7.398565553  |
| O | 10.971745608 | 13.111602768 | 10.356396269 |
| O | -0.027066321 | 14.407691817 | 2.965036480  |
| O | -0.026429350 | 14.408277965 | 5.922593932  |
| O | -0.026478058 | 14.406919573 | 8.882677595  |
| O | -0.026173861 | 14.407428211 | 0.006681358  |
| O | 6.466839715  | 14.391542911 | 2.965828827  |
| O | 6.468515919  | 14.427752307 | 5.886805725  |
| O | 6.466492394  | 14.422425894 | 8.910208978  |
| O | 6.469037290  | 14.385687500 | -0.001704645 |
| O | 9.691851857  | 15.118561909 | 8.896825797  |
| O | 3.204625961  | 15.117187800 | 8.898382335  |
| O | 9.690358275  | 15.114345284 | 5.908707165  |
| O | 9.681205327  | 15.118250082 | 2.958176732  |
| O | 3.217747117  | 15.115122529 | 2.961107633  |
| O | 9.688900022  | 15.121391566 | -0.005059402 |
| O | 3.207937066  | 15.118081131 | -0.005024268 |
| O | 3.205021080  | 15.113414447 | 5.911365749  |
| O | 1.245791657  | 16.481501518 | 10.358249376 |
| O | 5.173285642  | 16.493662400 | 4.440012877  |
| O | 5.161563380  | 16.397798388 | 7.407012952  |
| O | 7.723971763  | 16.445636453 | 1.468335259  |

|   |              |              |              |
|---|--------------|--------------|--------------|
| O | 7.728227933  | 16.502540351 | 4.438057799  |
| O | 5.180118530  | 16.486983309 | 10.374815429 |
| O | 11.657894035 | 16.461847509 | 1.478313645  |
| O | 11.658744542 | 16.461612121 | 4.438199991  |
| O | 1.241569648  | 16.474654905 | 4.437567462  |
| O | 1.242610310  | 16.471181592 | 1.480347863  |
| O | 5.177345162  | 16.433435209 | 1.466730574  |
| O | 7.738005902  | 16.414086598 | 7.407111611  |
| O | 7.719960042  | 16.496906397 | 10.371209649 |
| O | 1.237242429  | 16.465878753 | 7.402530598  |
| O | 11.661605585 | 16.455881369 | 7.403432605  |
| O | 11.655023770 | 16.471471987 | 10.358216608 |
| O | 3.235851296  | 17.753723148 | 8.874450108  |
| O | 3.242193467  | 17.762527518 | 0.012968199  |
| O | 9.693413760  | 17.746882250 | 2.935013192  |
| O | 9.701640866  | 17.727549712 | 5.942858392  |
| O | 3.209582747  | 17.741574410 | 2.936329235  |
| O | 3.197530179  | 17.724683622 | 5.942704843  |
| O | 9.660795766  | 17.752799098 | 8.874023178  |
| O | 9.651483186  | 17.768978722 | 0.008269482  |
| O | 6.461768368  | 18.913867210 | 0.038794109  |
| O | 6.441903037  | 18.495463363 | 6.082003707  |



|   |              |              |              |
|---|--------------|--------------|--------------|
| O | -0.054492952 | 18.510805020 | 0.001601728  |
| O | 6.440393089  | 18.423405691 | 2.861271842  |
| O | -0.055743903 | 18.509750596 | 5.914269797  |
| O | 6.436051063  | 18.491673223 | 8.808548235  |
| O | -0.053478916 | 18.509727378 | 8.880811594  |
| O | -0.059912269 | 18.512802425 | 2.968050899  |
| O | 1.993896660  | 19.970268012 | 4.434315623  |
| O | 4.471767438  | 20.085996774 | 1.491076837  |
| O | 4.457033983  | 19.754333598 | 4.455318132  |
| O | 1.980871881  | 19.931458632 | 7.416788934  |
| O | 1.999576403  | 19.941957153 | 10.358821455 |
| O | 4.460978422  | 20.024077575 | 7.381081759  |
| O | 4.486916016  | 20.031800374 | 10.340347050 |
| O | 8.411625722  | 20.099202793 | 1.497543961  |
| O | 8.424833124  | 19.749163991 | 4.450873396  |
| O | 10.892926712 | 19.933431034 | 1.454910083  |
| O | 10.882612696 | 19.987338824 | 4.435315106  |
| O | 8.426897044  | 20.048472206 | 7.378967455  |
| O | 8.394922255  | 20.077359926 | 10.327565759 |
| O | 10.903983299 | 19.933841445 | 7.414522027  |
| O | 10.879622674 | 19.946063407 | 10.359616286 |
| O | 1.983328843  | 19.922599970 | 1.465300967  |

|   |              |              |              |
|---|--------------|--------------|--------------|
| O | 6.439623373  | 21.069480862 | 3.234650690  |
| O | 6.440874844  | 21.160384580 | 5.657337865  |
| O | -0.054156022 | 21.110702702 | 2.956651541  |
| O | -0.051206526 | 21.110016540 | 5.921280610  |
| O | -0.053530352 | 21.111804275 | 8.879230923  |
| O | -0.050952595 | 21.113388411 | 0.000536472  |
| O | 6.443426494  | 21.244278449 | 8.886015908  |
| H | 0.000000000  | 0.932899949  | 9.814800036  |
| H | 0.816399984  | 0.932899949  | 8.400899982  |
| H | 6.457700016  | 0.932899949  | 6.856699960  |
| H | 0.834099951  | 0.932899949  | -0.439200043 |
| H | 0.000000000  | 0.932899949  | 3.900000036  |
| H | 0.816399984  | 0.932899949  | 2.486099982  |
| H | 6.457700016  | 0.932899949  | 0.941899960  |
| H | 0.834099951  | 0.932899949  | 5.475599957  |
| H | 6.494400000  | 0.932899949  | 9.814800036  |
| H | 7.310799984  | 0.932899949  | 8.400899982  |
| H | -0.036699984 | 0.932899949  | 6.856699960  |
| H | 7.328499951  | 0.932899949  | -0.439200043 |
| H | 6.494400000  | 0.932899949  | 3.900000036  |
| H | 7.310799984  | 0.932899949  | 2.486099982  |
| H | -0.036699984 | 0.932899949  | 0.941899960  |

|   |             |              |             |
|---|-------------|--------------|-------------|
| H | 7.328499951 | 0.932899949  | 5.475599957 |
| H | 6.438210581 | 21.477829104 | 4.468893544 |
| H | 7.278825844 | 21.743056059 | 8.968054894 |

8-b:

|    |             |             |              |
|----|-------------|-------------|--------------|
| Ti | 3.247200000 | 3.247194072 | 1.478700000  |
| Ti | 3.247200000 | 3.247194072 | 4.436100000  |
| Ti | 0.000000000 | 3.247194072 | 2.957400000  |
| Ti | 0.000000000 | 3.247194072 | 0.000000000  |
| Ti | 3.247200000 | 3.247194072 | 7.393500000  |
| Ti | 3.247200000 | 3.247194072 | 10.350900000 |
| Ti | 0.000000000 | 3.247194072 | 8.872200000  |
| Ti | 0.000000000 | 3.247194072 | 5.914800000  |
| Ti | 9.741600000 | 3.247194072 | 1.478700000  |
| Ti | 9.741600000 | 3.247194072 | 4.436100000  |
| Ti | 6.494400000 | 3.247194072 | 2.957400000  |
| Ti | 6.494400000 | 3.247194072 | 0.000000000  |
| Ti | 9.741600000 | 3.247194072 | 7.393500000  |
| Ti | 9.741600000 | 3.247194072 | 10.350900000 |
| Ti | 6.494400000 | 3.247194072 | 8.872200000  |
| Ti | 6.494400000 | 3.247194072 | 5.914800000  |
| Ti | 0.000000000 | 6.494391717 | 4.436100000  |
| Ti | 0.000000000 | 6.494391717 | 1.478700000  |

|    |              |             |              |
|----|--------------|-------------|--------------|
| Ti | 3.247200000  | 6.494391717 | 2.957400000  |
| Ti | 3.247200000  | 6.494391717 | 0.000000000  |
| Ti | 0.000000000  | 6.494391717 | 10.350900000 |
| Ti | 0.000000000  | 6.494391717 | 7.393500000  |
| Ti | 3.247200000  | 6.494391717 | 8.872200000  |
| Ti | 3.247200000  | 6.494391717 | 5.914800000  |
| Ti | 6.494400000  | 6.494391717 | 4.436100000  |
| Ti | 6.494400000  | 6.494391717 | 1.478700000  |
| Ti | 9.741600000  | 6.494391717 | 2.957400000  |
| Ti | 9.741600000  | 6.494391717 | 0.000000000  |
| Ti | 6.494400000  | 6.494391717 | 10.350900000 |
| Ti | 6.494400000  | 6.494391717 | 7.393500000  |
| Ti | 9.741600000  | 6.494391717 | 8.872200000  |
| Ti | 9.741600000  | 6.494391717 | 5.914800000  |
| Ti | 3.226586774  | 9.738592182 | 1.478281114  |
| Ti | 3.225822903  | 9.735512134 | 4.436019914  |
| Ti | -0.014797361 | 9.834020064 | 2.964727018  |
| Ti | -0.017129759 | 9.834168655 | 0.008879298  |
| Ti | 3.225526888  | 9.736587990 | 7.394521368  |
| Ti | 3.226702764  | 9.738842929 | 10.351836431 |
| Ti | -0.016077667 | 9.832702749 | 8.882758983  |
| Ti | -0.012811893 | 9.835113422 | 5.923253077  |

|    |              |              |              |
|----|--------------|--------------|--------------|
| Ti | 9.731354305  | 9.738827570  | 1.480439898  |
| Ti | 9.738274348  | 9.737091270  | 4.438167104  |
| Ti | 6.482652540  | 9.757257846  | 2.971233771  |
| Ti | 6.475987986  | 9.731193353  | 0.010354449  |
| Ti | 9.737417996  | 9.736362603  | 7.396603259  |
| Ti | 9.730121148  | 9.739346209  | 10.353452236 |
| Ti | 6.481227408  | 9.751783199  | 8.876227742  |
| Ti | 6.480160119  | 9.754833956  | 5.922481432  |
| Ti | -0.028625757 | 13.170763748 | 1.510362989  |
| Ti | -0.031040764 | 13.174151692 | 4.466860154  |
| Ti | 3.216308088  | 12.992529996 | 2.962034009  |
| Ti | 3.211573540  | 12.991200179 | 5.918908538  |
| Ti | 6.466523308  | 13.007664840 | 1.515532051  |
| Ti | 6.463421582  | 13.123569696 | 4.485993349  |
| Ti | 9.713227135  | 12.993857670 | 2.965213569  |
| Ti | 9.714204023  | 12.992548927 | 5.922686203  |
| Ti | -0.029347414 | 13.169757544 | 7.425258099  |
| Ti | -0.027134123 | 13.173395879 | 10.383002932 |
| Ti | 3.216461225  | 12.992260318 | 8.877495166  |
| Ti | 3.218762191  | 12.997878555 | 0.006637234  |
| Ti | 6.462374685  | 13.095758546 | 7.359068175  |
| Ti | 6.465201567  | 13.000252438 | 10.338795717 |

|    |              |              |              |
|----|--------------|--------------|--------------|
| Ti | 9.713484573  | 12.994298800 | 8.879909942  |
| Ti | 9.714856580  | 12.997530653 | 0.008053710  |
| Ti | 9.697949969  | 16.321743406 | 1.483927264  |
| Ti | 9.710052153  | 16.311280961 | 4.440751399  |
| Ti | 6.444051904  | 16.312346101 | 2.977175897  |
| Ti | -0.051922728 | 16.623563021 | 5.924460406  |
| Ti | 3.199893232  | 16.321379429 | 1.484302853  |
| Ti | 3.178022690  | 16.306167432 | 4.444283717  |
| Ti | -0.048755279 | 16.627081697 | 2.960375618  |
| Ti | 6.446918143  | 16.518052387 | 5.917232402  |
| Ti | 3.183361996  | 16.306513907 | 7.404237610  |
| Ti | 3.194603673  | 16.320129622 | 10.358249376 |
| Ti | -0.050531368 | 16.622158194 | 8.882377833  |
| Ti | 6.452241473  | 16.263062846 | 0.006518110  |
| Ti | 9.703114186  | 16.309497870 | 7.398732824  |
| Ti | 9.701429149  | 16.316683813 | 10.356876196 |
| Ti | 6.444010470  | 16.280869826 | 8.869256204  |
| Ti | -0.044105808 | 16.621599906 | 0.008463606  |
| Ti | 6.438492958  | 19.789887908 | 7.327049351  |
| Ti | 6.419112239  | 19.592121950 | 10.208631197 |
| Ti | 3.204203305  | 19.575275453 | 8.879901661  |
| Ti | 3.199882061  | 19.565502027 | 0.007223272  |

|    |              |              |              |
|----|--------------|--------------|--------------|
| Ti | 6.423933032  | 19.610746537 | 1.679128913  |
| Ti | 6.448378214  | 20.000154792 | 4.397322926  |
| Ti | 3.206046286  | 19.574040290 | 2.962677185  |
| Ti | 3.178923723  | 19.549694595 | 5.918332082  |
| Ti | -0.062281945 | 19.989768429 | 1.483993628  |
| Ti | -0.065569930 | 19.989200854 | 4.441269653  |
| Ti | 9.671579717  | 19.574059222 | 2.960195334  |
| Ti | 9.683109485  | 19.561584727 | 5.923875078  |
| Ti | -0.059243216 | 19.989797004 | 7.402662262  |
| Ti | -0.059120472 | 19.988141430 | 10.357874022 |
| Ti | 9.684514873  | 19.567765895 | 8.889794282  |
| Ti | 9.652528784  | 19.567371915 | 0.010183866  |
| O  | 0.000000000  | 1.266694833  | 2.957400000  |
| O  | 0.000000000  | 1.266694833  | 0.000000000  |
| O  | 0.000000000  | 1.266694833  | 8.872200000  |
| O  | 0.000000000  | 1.266694833  | 5.914800000  |
| O  | 6.494400000  | 1.266694833  | 2.957400000  |
| O  | 6.494400000  | 1.266694833  | 0.000000000  |
| O  | 6.494400000  | 1.266694833  | 8.872200000  |
| O  | 6.494400000  | 1.266694833  | 5.914800000  |
| O  | 9.741600000  | 1.980495667  | 8.872200000  |
| O  | 9.741600000  | 1.980495667  | 5.914800000  |

|   |              |             |              |
|---|--------------|-------------|--------------|
| O | 9.741600000  | 1.980495667 | 2.957400000  |
| O | 9.741600000  | 1.980495667 | 0.000000000  |
| O | 3.247200000  | 1.980495667 | 8.872200000  |
| O | 3.247200000  | 1.980495667 | 5.914800000  |
| O | 3.247200000  | 1.980495667 | 2.957400000  |
| O | 3.247200000  | 1.980495667 | 0.000000000  |
| O | 1.266698949  | 3.247194072 | 1.478700000  |
| O | 1.266698949  | 3.247194072 | 4.436100000  |
| O | 5.227599738  | 3.247194072 | 1.478700000  |
| O | 5.227599738  | 3.247194072 | 4.436100000  |
| O | 1.266698949  | 3.247194072 | 7.393500000  |
| O | 1.266698949  | 3.247194072 | 10.350900000 |
| O | 5.227599738  | 3.247194072 | 7.393500000  |
| O | 5.227599738  | 3.247194072 | 10.350900000 |
| O | 7.761098949  | 3.247194072 | 1.478700000  |
| O | 7.761098949  | 3.247194072 | 4.436100000  |
| O | 11.721999738 | 3.247194072 | 1.478700000  |
| O | 11.721999738 | 3.247194072 | 4.436100000  |
| O | 7.761098949  | 3.247194072 | 7.393500000  |
| O | 7.761098949  | 3.247194072 | 10.350900000 |
| O | 11.721999738 | 3.247194072 | 7.393500000  |
| O | 11.721999738 | 3.247194072 | 10.350900000 |



|   |              |             |              |
|---|--------------|-------------|--------------|
| O | 9.741600000  | 4.513896049 | 8.872200000  |
| O | 9.741600000  | 4.513896049 | 5.914800000  |
| O | 9.741600000  | 4.513896049 | 2.957400000  |
| O | 9.741600000  | 4.513896049 | 0.000000000  |
| O | 3.247200000  | 4.513896049 | 8.872200000  |
| O | 3.247200000  | 4.513896049 | 5.914800000  |
| O | 3.247200000  | 4.513896049 | 2.957400000  |
| O | 3.247200000  | 4.513896049 | 0.000000000  |
| O | 0.000000000  | 5.227596870 | 2.957400000  |
| O | 0.000000000  | 5.227596870 | 0.000000000  |
| O | 0.000000000  | 5.227596870 | 8.872200000  |
| O | 0.000000000  | 5.227596870 | 5.914800000  |
| O | 6.494400000  | 5.227596870 | 0.000000000  |
| O | 6.494400000  | 5.227596870 | 2.957400000  |
| O | 6.494400000  | 5.227596870 | 8.872200000  |
| O | 6.494400000  | 5.227596870 | 5.914800000  |
| O | 8.474899752  | 6.494391717 | 7.393500000  |
| O | 11.008298949 | 6.494391717 | 7.393500000  |
| O | 8.474899752  | 6.494391717 | 10.350900000 |
| O | 11.008298949 | 6.494391717 | 10.350900000 |
| O | 8.474899752  | 6.494391717 | 1.478700000  |
| O | 11.008298949 | 6.494391717 | 1.478700000  |

|   |              |             |              |
|---|--------------|-------------|--------------|
| O | 8.474899752  | 6.494391717 | 4.436100000  |
| O | 11.008298949 | 6.494391717 | 4.436100000  |
| O | 1.980499752  | 6.494391717 | 1.478700000  |
| O | 4.513898949  | 6.494391717 | 1.478700000  |
| O | 1.980499752  | 6.494391717 | 4.436100000  |
| O | 4.513898949  | 6.494391717 | 4.436100000  |
| O | 1.980499752  | 6.494391717 | 7.393500000  |
| O | 4.513898949  | 6.494391717 | 7.393500000  |
| O | 1.980499752  | 6.494391717 | 10.350900000 |
| O | 4.513898949  | 6.494391717 | 10.350900000 |
| O | 0.000000000  | 7.761086550 | 8.872200000  |
| O | 0.000000000  | 7.761086550 | 5.914800000  |
| O | 6.494400000  | 7.761086550 | 2.957400000  |
| O | 6.494400000  | 7.761086550 | 0.000000000  |
| O | 0.000000000  | 7.761086550 | 2.957400000  |
| O | 0.000000000  | 7.761086550 | 0.000000000  |
| O | 6.494400000  | 7.761086550 | 8.872200000  |
| O | 6.494400000  | 7.761086550 | 5.914800000  |
| O | 3.247200000  | 8.474887384 | 2.957400000  |
| O | 3.247200000  | 8.474887384 | 0.000000000  |
| O | 3.247200000  | 8.474887384 | 8.872200000  |
| O | 3.247200000  | 8.474887384 | 5.914800000  |

|   |              |              |              |
|---|--------------|--------------|--------------|
| O | 9.741600000  | 8.474887384  | 2.957400000  |
| O | 9.741600000  | 8.474887384  | 0.000000000  |
| O | 9.741600000  | 8.474887384  | 8.872200000  |
| O | 9.741600000  | 8.474887384  | 5.914800000  |
| O | 1.268220847  | 9.785778018  | 1.481920845  |
| O | 1.268762610  | 9.786253795  | 4.438833939  |
| O | 5.210154481  | 9.771106807  | 1.483398835  |
| O | 5.210490631  | 9.770284556  | 4.441084520  |
| O | 1.268808330  | 9.786359523  | 7.397051837  |
| O | 1.267943926  | 9.785790877  | 10.354291428 |
| O | 5.210361912  | 9.771261470  | 7.396145927  |
| O | 5.210036673  | 9.770115605  | 10.355993589 |
| O | 7.758826299  | 9.780188356  | 1.481995963  |
| O | 7.759950220  | 9.777909842  | 4.440667409  |
| O | 11.700396766 | 9.778392406  | 1.482464770  |
| O | 11.701146480 | 9.779050706  | 4.439726837  |
| O | 7.759347150  | 9.779515410  | 7.396609174  |
| O | 7.758334673  | 9.778593146  | 10.356338304 |
| O | 11.700979703 | 9.778912117  | 7.396506611  |
| O | 11.700457424 | 9.778016642  | 10.354536419 |
| O | 9.725749767  | 11.070849192 | 2.959972465  |
| O | 9.726308935  | 11.071392120 | 0.002551053  |

|   |              |              |             |
|---|--------------|--------------|-------------|
| O | 3.243284007  | 11.070734891 | 2.959709729 |
| O | 3.242409990  | 11.071386405 | 0.002341196 |
| O | 3.243498841  | 11.069903711 | 8.874596795 |
| O | 3.244329735  | 11.070093735 | 5.916240136 |
| O | 9.726437524  | 11.070376273 | 8.875151012 |
| O | 9.723816384  | 11.070896698 | 5.916893721 |
| O | 6.462789157  | 11.782720129 | 8.871652644 |
| O | -0.027235435 | 11.797216318 | 2.957809896 |
| O | 6.465992715  | 11.783824917 | 0.007581709 |
| O | 6.470031063  | 11.796035091 | 5.914728076 |
| O | -0.027079700 | 11.797617085 | 0.001734219 |
| O | -0.026849408 | 11.797008076 | 5.915974561 |
| O | 6.463689281  | 11.788808071 | 2.973354582 |
| O | -0.027649259 | 11.797038795 | 8.874587805 |
| O | 8.434559137  | 13.086840589 | 1.483674465 |
| O | 8.437694374  | 13.099514396 | 4.437751530 |
| O | 10.970717805 | 13.115266106 | 1.482628492 |
| O | 10.970818858 | 13.111434889 | 4.441135624 |
| O | 1.960785221  | 13.098610349 | 1.482452941 |
| O | 1.959263064  | 13.094067252 | 4.438851920 |
| O | 4.496714247  | 13.103260959 | 1.482596789 |
| O | 4.492737336  | 13.117270298 | 4.438956848 |

|   |              |              |              |
|---|--------------|--------------|--------------|
| O | 1.959842494  | 13.093027473 | 7.399690311  |
| O | 1.961169950  | 13.097824888 | 10.356879626 |
| O | 4.493043223  | 13.110299026 | 7.399996580  |
| O | 4.497449933  | 13.103987126 | 10.357228599 |
| O | 8.437455899  | 13.092647780 | 7.402468966  |
| O | 8.433802150  | 13.086220865 | 10.356893467 |
| O | 10.970735469 | 13.110917678 | 7.398449386  |
| O | 10.970461795 | 13.115418983 | 10.358145393 |
| O | -0.028577568 | 14.407338556 | 2.967374246  |
| O | -0.027496900 | 14.407511436 | 5.924902478  |
| O | -0.028231806 | 14.406132684 | 8.881463878  |
| O | -0.026433897 | 14.407731822 | 0.010379764  |
| O | 6.460670035  | 14.407273905 | 2.944504198  |
| O | 6.471851703  | 14.423495320 | 5.926405784  |
| O | 6.462227002  | 14.394349708 | 8.890251615  |
| O | 6.468744133  | 14.402067507 | 0.005939760  |
| O | 9.684179892  | 15.109318553 | 8.881752520  |
| O | 3.207626893  | 15.109229612 | 8.884663312  |
| O | 9.691552335  | 15.108719545 | 5.920975524  |
| O | 9.683503176  | 15.113120837 | 2.957940731  |
| O | 3.207814841  | 15.112638988 | 2.957824091  |
| O | 9.674044472  | 15.112922597 | 0.009007531  |

|   |              |              |              |
|---|--------------|--------------|--------------|
| O | 3.213163239  | 15.113354797 | 0.007602884  |
| O | 3.191460773  | 15.106268509 | 5.923444953  |
| O | 1.241961650  | 16.465754451 | 10.356983845 |
| O | 5.164725114  | 16.423842164 | 4.451990583  |
| O | 5.166472237  | 16.430285867 | 7.393603509  |
| O | 7.718836641  | 16.488098098 | 1.486471337  |
| O | 7.727785145  | 16.441891319 | 4.444064278  |
| O | 5.173856890  | 16.461774285 | 10.362785672 |
| O | 11.651672400 | 16.457954856 | 1.484138659  |
| O | 11.653214301 | 16.456675402 | 4.443347404  |
| O | 1.238719645  | 16.471581644 | 4.442249263  |
| O | 1.243099988  | 16.469998579 | 1.488124879  |
| O | 5.173447613  | 16.474716341 | 1.477241292  |
| O | 7.726109070  | 16.447609569 | 7.400793540  |
| O | 7.719289690  | 16.470389702 | 10.354089615 |
| O | 1.238390249  | 16.468596610 | 7.403761705  |
| O | 11.652230269 | 16.455018399 | 7.402669714  |
| O | 11.652421724 | 16.451997645 | 10.361042817 |
| O | 3.225388687  | 17.748668556 | 8.878157860  |
| O | 3.211365849  | 17.743141759 | 0.003192927  |
| O | 9.672011205  | 17.748243143 | 2.968061072  |
| O | 9.672634797  | 17.737167403 | 5.925103463  |

|   |              |              |              |
|---|--------------|--------------|--------------|
| O | 3.229527309  | 17.748230284 | 2.970340873  |
| O | 3.223279436  | 17.729298156 | 5.923228235  |
| O | 9.669565154  | 17.743210339 | 8.883275108  |
| O | 9.673046672  | 17.743894358 | 0.000789744  |
| O | 6.457092789  | 18.672701627 | -0.012825297 |
| O | 6.444641466  | 18.541552270 | 5.917695413  |
| O | -0.055086800 | 18.500986231 | 0.008396295  |
| O | 6.419949757  | 18.466012712 | 3.083706295  |
| O | -0.062512627 | 18.498678428 | 5.928802224  |
| O | 6.422847948  | 18.452738112 | 8.792131116  |
| O | -0.062671090 | 18.499515681 | 8.884457240  |
| O | -0.065291710 | 18.501312345 | 2.962726632  |
| O | 1.970295621  | 19.915442959 | 4.437111431  |
| O | 4.478089477  | 19.953211845 | 1.457440908  |
| O | 4.436092530  | 20.011054080 | 4.472005084  |
| O | 1.981973851  | 19.936396066 | 7.409491135  |
| O | 1.991803385  | 19.948663748 | 10.351244360 |
| O | 4.460693317  | 19.986895552 | 7.394036709  |
| O | 4.493861907  | 19.980750817 | 10.366044254 |
| O | 8.391936779  | 19.943925626 | 1.470918016  |
| O | 8.426903928  | 19.978637682 | 4.471291759  |
| O | 10.880243799 | 19.950934403 | 1.483665948  |

|   |              |              |              |
|---|--------------|--------------|--------------|
| O | 10.892292599 | 19.935942792 | 4.444166723  |
| O | 8.409694937  | 19.984005172 | 7.410289515  |
| O | 8.380149833  | 20.015249631 | 10.361592302 |
| O | 10.887394912 | 19.947473235 | 7.412637099  |
| O | 10.880626059 | 19.951065849 | 10.362749237 |
| O | 1.988213151  | 19.942880489 | 1.488375430  |
| O | 6.442576247  | 21.048158421 | 2.893013617  |
| O | 6.419222254  | 21.283885076 | 5.948876701  |
| O | -0.057366594 | 21.101325399 | 2.963732621  |
| O | -0.055494648 | 21.099777339 | 5.923133835  |
| O | -0.058133582 | 21.101027860 | 8.881137736  |
| O | -0.053657512 | 21.101171451 | 0.006647407  |
| O | 6.436196927  | 21.165264863 | 8.943032569  |
| H | 0.000000000  | 0.932897449  | 9.814799089  |
| H | 0.816399334  | 0.932897449  | 8.400899272  |
| H | 6.457698847  | 0.932897449  | 6.856699960  |
| H | 0.834099172  | 0.932897449  | -0.439201108 |
| H | 0.000000000  | 0.932897449  | 3.899999089  |
| H | 0.816399334  | 0.932897449  | 2.486099272  |
| H | 6.457698847  | 0.932897449  | 0.941899960  |
| H | 0.834099172  | 0.932897449  | 5.475598892  |
| H | 6.494400000  | 0.932897449  | 9.814799089  |



|   |              |              |              |
|---|--------------|--------------|--------------|
| H | 7.310799334  | 0.932897449  | 8.400899272  |
| H | -0.036701153 | 0.932897449  | 6.856699960  |
| H | 7.328499172  | 0.932897449  | -0.439201108 |
| H | 6.494400000  | 0.932897449  | 3.899999089  |
| H | 7.310799334  | 0.932897449  | 2.486099272  |
| H | -0.036701153 | 0.932897449  | 0.941899960  |
| H | 7.328499172  | 0.932897449  | 5.475598892  |
| H | 5.650693273  | 21.878668859 | 6.020583241  |
| H | 7.267256201  | 21.670665843 | 8.946719146  |

TS8-2:

|    |             |             |              |
|----|-------------|-------------|--------------|
| Ti | 3.247200000 | 3.247190143 | 1.478700000  |
| Ti | 3.247200000 | 3.247190143 | 4.436100000  |
| Ti | 0.000000000 | 3.247190143 | 2.957400000  |
| Ti | 0.000000000 | 3.247190143 | 0.000000000  |
| Ti | 3.247200000 | 3.247190143 | 7.393500000  |
| Ti | 3.247200000 | 3.247190143 | 10.350900000 |
| Ti | 0.000000000 | 3.247190143 | 8.872200000  |
| Ti | 0.000000000 | 3.247190143 | 5.914800000  |
| Ti | 9.741600000 | 3.247190143 | 1.478700000  |
| Ti | 9.741600000 | 3.247190143 | 4.436100000  |
| Ti | 6.494400000 | 3.247190143 | 2.957400000  |
| Ti | 6.494400000 | 3.247190143 | 0.000000000  |

|    |             |             |              |
|----|-------------|-------------|--------------|
| Ti | 9.741600000 | 3.247190143 | 7.393500000  |
| Ti | 9.741600000 | 3.247190143 | 10.350900000 |
| Ti | 6.494400000 | 3.247190143 | 8.872200000  |
| Ti | 6.494400000 | 3.247190143 | 5.914800000  |
| Ti | 0.000000000 | 6.494389931 | 4.436100000  |
| Ti | 0.000000000 | 6.494389931 | 1.478700000  |
| Ti | 3.247200000 | 6.494389931 | 2.957400000  |
| Ti | 3.247200000 | 6.494389931 | 0.000000000  |
| Ti | 0.000000000 | 6.494389931 | 10.350900000 |
| Ti | 0.000000000 | 6.494389931 | 7.393500000  |
| Ti | 3.247200000 | 6.494389931 | 8.872200000  |
| Ti | 3.247200000 | 6.494389931 | 5.914800000  |
| Ti | 6.494400000 | 6.494389931 | 4.436100000  |
| Ti | 6.494400000 | 6.494389931 | 1.478700000  |
| Ti | 9.741600000 | 6.494389931 | 2.957400000  |
| Ti | 9.741600000 | 6.494389931 | 0.000000000  |
| Ti | 6.494400000 | 6.494389931 | 10.350900000 |
| Ti | 6.494400000 | 6.494389931 | 7.393500000  |
| Ti | 9.741600000 | 6.494389931 | 8.872200000  |
| Ti | 9.741600000 | 6.494389931 | 5.914800000  |
| Ti | 3.227118666 | 9.738738629 | 1.478583833  |
| Ti | 3.226613401 | 9.738116048 | 4.436137736  |

|    |              |              |              |
|----|--------------|--------------|--------------|
| Ti | -0.011876309 | 9.836860080  | 2.958614545  |
| Ti | -0.012713957 | 9.836969737  | 0.001305870  |
| Ti | 3.226521441  | 9.738317146  | 7.393822357  |
| Ti | 3.227263231  | 9.739692326  | 10.351166876 |
| Ti | -0.015801265 | 9.835441679  | 8.876117372  |
| Ti | -0.010701213 | 9.836691486  | 5.917274752  |
| Ti | 9.738108091  | 9.740354556  | 1.480670456  |
| Ti | 9.741546746  | 9.737154493  | 4.438852275  |
| Ti | 6.485549951  | 9.744822285  | 2.971651356  |
| Ti | 6.478786293  | 9.737196284  | 0.013307472  |
| Ti | 9.737508268  | 9.739304418  | 7.396356730  |
| Ti | 9.733239759  | 9.739264056  | 10.353362568 |
| Ti | 6.482296776  | 9.731122987  | 8.880718495  |
| Ti | 6.480581995  | 9.747979128  | 5.921445633  |
| Ti | -0.029653041 | 13.178280806 | 1.508251524  |
| Ti | -0.027579249 | 13.176098019 | 4.465488039  |
| Ti | 3.213949841  | 12.996240483 | 2.960013159  |
| Ti | 3.216436807  | 12.996001523 | 5.919676753  |
| Ti | 6.468239907  | 13.035239531 | 1.518609522  |
| Ti | 6.465398997  | 13.114121313 | 4.439439614  |
| Ti | 9.715921532  | 12.996513376 | 2.965405090  |
| Ti | 9.716625525  | 12.995884722 | 5.924254808  |

|    |              |              |              |
|----|--------------|--------------|--------------|
| Ti | -0.027252191 | 13.174486736 | 7.425670715  |
| Ti | -0.025903824 | 13.177605360 | 10.381800926 |
| Ti | 3.216535132  | 12.996302991 | 8.877101713  |
| Ti | 3.218737253  | 12.997938920 | 0.006956869  |
| Ti | 6.467026234  | 13.027379213 | 7.369332364  |
| Ti | 6.463568875  | 13.000785723 | 10.353135203 |
| Ti | 9.715616555  | 12.996994511 | 8.881551181  |
| Ti | 9.714783583  | 12.998368263 | 0.008042354  |
| Ti | 9.700356663  | 16.336762877 | 1.481749789  |
| Ti | 9.716841399  | 16.302763414 | 4.437347076  |
| Ti | 6.443663409  | 16.379420262 | 2.972273119  |
| Ti | -0.047208053 | 16.626755226 | 5.925130316  |
| Ti | 3.195482235  | 16.333257060 | 1.481887722  |
| Ti | 3.176270371  | 16.306994684 | 4.440310155  |
| Ti | -0.048474072 | 16.639376883 | 2.957263368  |
| Ti | 6.454464765  | 16.353606516 | 5.902981047  |
| Ti | 3.196457304  | 16.320000677 | 7.401475990  |
| Ti | 3.194474954  | 16.323775101 | 10.357036132 |
| Ti | -0.043385320 | 16.637276250 | 8.878453363  |
| Ti | 6.452740113  | 16.257341381 | 0.006406202  |
| Ti | 9.705095757  | 16.315499372 | 7.400366491  |
| Ti | 9.707220984  | 16.320912225 | 10.357671026 |

|    |              |              |              |
|----|--------------|--------------|--------------|
| Ti | 6.447781898  | 16.259102684 | 8.876837203  |
| Ti | -0.045731746 | 16.640624189 | 0.003883776  |
| Ti | 6.455127454  | 19.496652990 | 7.276547014  |
| Ti | 6.418206790  | 19.692414042 | 10.257460592 |
| Ti | 3.207058373  | 19.577040684 | 8.883293444  |
| Ti | 3.212383651  | 19.587879607 | 0.014120875  |
| Ti | 6.432581625  | 19.695981653 | 1.743271133  |
| Ti | 6.437313704  | 20.139104459 | 4.512886643  |
| Ti | 3.205893408  | 19.576234507 | 2.965648307  |
| Ti | 3.200376805  | 19.551101565 | 5.922833955  |
| Ti | -0.069968068 | 20.000873101 | 1.482063510  |
| Ti | -0.048596296 | 19.995044479 | 4.439051840  |
| Ti | 9.664576936  | 19.578553740 | 2.964444882  |
| Ti | 9.700732299  | 19.545191861 | 5.913445156  |
| Ti | -0.045636149 | 20.003173045 | 7.400470355  |
| Ti | -0.053271875 | 20.002811569 | 10.361041516 |
| Ti | 9.694439096  | 19.568788530 | 8.882123142  |
| Ti | 9.638744680  | 19.593685012 | 0.006109279  |
| O  | 0.000000000  | 1.266689833  | 2.957400000  |
| O  | 0.000000000  | 1.266689833  | 0.000000000  |
| O  | 0.000000000  | 1.266689833  | 8.872200000  |
| O  | 0.000000000  | 1.266689833  | 5.914800000  |

|   |             |             |              |
|---|-------------|-------------|--------------|
| O | 6.494400000 | 1.266689833 | 2.957400000  |
| O | 6.494400000 | 1.266689833 | 0.000000000  |
| O | 6.494400000 | 1.266689833 | 8.872200000  |
| O | 6.494400000 | 1.266689833 | 5.914800000  |
| O | 9.741600000 | 1.980499953 | 8.872200000  |
| O | 9.741600000 | 1.980499953 | 5.914800000  |
| O | 9.741600000 | 1.980499953 | 2.957400000  |
| O | 9.741600000 | 1.980499953 | 0.000000000  |
| O | 3.247200000 | 1.980499953 | 8.872200000  |
| O | 3.247200000 | 1.980499953 | 5.914800000  |
| O | 3.247200000 | 1.980499953 | 2.957400000  |
| O | 3.247200000 | 1.980499953 | 0.000000000  |
| O | 1.266699988 | 3.247190143 | 1.478700000  |
| O | 1.266699988 | 3.247190143 | 4.436100000  |
| O | 5.227599998 | 3.247190143 | 1.478700000  |
| O | 5.227599998 | 3.247190143 | 4.436100000  |
| O | 1.266699988 | 3.247190143 | 7.393500000  |
| O | 1.266699988 | 3.247190143 | 10.350900000 |
| O | 5.227599998 | 3.247190143 | 7.393500000  |
| O | 5.227599998 | 3.247190143 | 10.350900000 |
| O | 7.761099988 | 3.247190143 | 1.478700000  |
| O | 7.761099988 | 3.247190143 | 4.436100000  |

|   |              |             |              |
|---|--------------|-------------|--------------|
| O | 11.721999998 | 3.247190143 | 1.478700000  |
| O | 11.721999998 | 3.247190143 | 4.436100000  |
| O | 7.761099988  | 3.247190143 | 7.393500000  |
| O | 7.761099988  | 3.247190143 | 10.350900000 |
| O | 11.721999998 | 3.247190143 | 7.393500000  |
| O | 11.721999998 | 3.247190143 | 10.350900000 |
| O | 9.741600000  | 4.513899978 | 8.872200000  |
| O | 9.741600000  | 4.513899978 | 5.914800000  |
| O | 9.741600000  | 4.513899978 | 2.957400000  |
| O | 9.741600000  | 4.513899978 | 0.000000000  |
| O | 3.247200000  | 4.513899978 | 8.872200000  |
| O | 3.247200000  | 4.513899978 | 5.914800000  |
| O | 3.247200000  | 4.513899978 | 2.957400000  |
| O | 3.247200000  | 4.513899978 | 0.000000000  |
| O | 0.000000000  | 5.227600085 | 2.957400000  |
| O | 0.000000000  | 5.227600085 | 0.000000000  |
| O | 0.000000000  | 5.227600085 | 8.872200000  |
| O | 0.000000000  | 5.227600085 | 5.914800000  |
| O | 6.494400000  | 5.227600085 | 0.000000000  |
| O | 6.494400000  | 5.227600085 | 2.957400000  |
| O | 6.494400000  | 5.227600085 | 8.872200000  |
| O | 6.494400000  | 5.227600085 | 5.914800000  |

|   |              |             |              |
|---|--------------|-------------|--------------|
| O | 8.474900012  | 6.494389931 | 7.393500000  |
| O | 11.008299988 | 6.494389931 | 7.393500000  |
| O | 8.474900012  | 6.494389931 | 10.350900000 |
| O | 11.008299988 | 6.494389931 | 10.350900000 |
| O | 8.474900012  | 6.494389931 | 1.478700000  |
| O | 11.008299988 | 6.494389931 | 1.478700000  |
| O | 8.474900012  | 6.494389931 | 4.436100000  |
| O | 11.008299988 | 6.494389931 | 4.436100000  |
| O | 1.980500012  | 6.494389931 | 1.478700000  |
| O | 4.513899988  | 6.494389931 | 1.478700000  |
| O | 1.980500012  | 6.494389931 | 4.436100000  |
| O | 4.513899988  | 6.494389931 | 4.436100000  |
| O | 1.980500012  | 6.494389931 | 7.393500000  |
| O | 4.513899988  | 6.494389931 | 7.393500000  |
| O | 1.980500012  | 6.494389931 | 10.350900000 |
| O | 4.513899988  | 6.494389931 | 10.350900000 |
| O | 0.000000000  | 7.761090122 | 8.872200000  |
| O | 0.000000000  | 7.761090122 | 5.914800000  |
| O | 6.494400000  | 7.761090122 | 2.957400000  |
| O | 6.494400000  | 7.761090122 | 0.000000000  |
| O | 0.000000000  | 7.761090122 | 2.957400000  |
| O | 0.000000000  | 7.761090122 | 0.000000000  |



|   |              |             |              |
|---|--------------|-------------|--------------|
| O | 6.494400000  | 7.761090122 | 8.872200000  |
| O | 6.494400000  | 7.761090122 | 5.914800000  |
| O | 3.247200000  | 8.474889884 | 2.957400000  |
| O | 3.247200000  | 8.474889884 | 0.000000000  |
| O | 3.247200000  | 8.474889884 | 8.872200000  |
| O | 3.247200000  | 8.474889884 | 5.914800000  |
| O | 9.741600000  | 8.474889884 | 2.957400000  |
| O | 9.741600000  | 8.474889884 | 0.000000000  |
| O | 9.741600000  | 8.474889884 | 8.872200000  |
| O | 9.741600000  | 8.474889884 | 5.914800000  |
| O | 1.269903286  | 9.787755778 | 1.479898220  |
| O | 1.269779503  | 9.786912810 | 4.436954097  |
| O | 5.211533502  | 9.776340351 | 1.485103717  |
| O | 5.211226187  | 9.769518027 | 4.439140089  |
| O | 1.269660266  | 9.788041886 | 7.395063045  |
| O | 1.268677143  | 9.786281655 | 10.351424051 |
| O | 5.211517526  | 9.776713614 | 7.396791704  |
| O | 5.211035511  | 9.771095376 | 10.355398679 |
| O | 7.759223756  | 9.783762753 | 1.483326557  |
| O | 7.760415608  | 9.776972934 | 4.440140282  |
| O | 11.701274809 | 9.781429233 | 1.480336980  |
| O | 11.702486924 | 9.780878803 | 4.437281067  |

|   |              |              |              |
|---|--------------|--------------|--------------|
| O | 7.758911635  | 9.783597017  | 7.396680388  |
| O | 7.758454949  | 9.779323599  | 10.355829868 |
| O | 11.701140245 | 9.781432805  | 7.393424172  |
| O | 11.700908135 | 9.779649356  | 10.352432170 |
| O | 9.723931465  | 11.074167842 | 2.961381962  |
| O | 9.725451025  | 11.073738142 | 0.001262810  |
| O | 3.244129188  | 11.074193917 | 2.960563945  |
| O | 3.242712499  | 11.073648488 | 0.000764784  |
| O | 3.243423896  | 11.073053052 | 8.875163551  |
| O | 3.244000209  | 11.073488824 | 5.914198938  |
| O | 9.725091235  | 11.073030550 | 8.875731964  |
| O | 9.724617014  | 11.073251650 | 5.915178665  |
| O | 6.466190275  | 11.781153138 | 8.878938258  |
| O | -0.024903686 | 11.799095850 | 2.958080439  |
| O | 6.466338737  | 11.786923181 | 0.006549813  |
| O | 6.467666582  | 11.793376171 | 5.898086550  |
| O | -0.025399209 | 11.798410046 | -0.001513479 |
| O | -0.024774967 | 11.799719504 | 5.913493302  |
| O | 6.467311728  | 11.796863772 | 2.979682708  |
| O | -0.025988511 | 11.798763664 | 8.872256900  |
| O | 8.434780466  | 13.086944889 | 1.481859923  |
| O | 8.435657210  | 13.110668360 | 4.440377820  |

|   |              |              |              |
|---|--------------|--------------|--------------|
| O | 10.970824313 | 13.113150114 | 1.482814098  |
| O | 10.970949005 | 13.116395540 | 4.439682713  |
| O | 1.961710414  | 13.099157206 | 1.481213672  |
| O | 1.961834976  | 13.102639092 | 4.438638750  |
| O | 4.498180033  | 13.102978422 | 1.481645452  |
| O | 4.496976621  | 13.127305544 | 4.439334804  |
| O | 1.962226459  | 13.099141132 | 7.398982901  |
| O | 1.963561058  | 13.103545282 | 10.355474743 |
| O | 4.498063134  | 13.101474653 | 7.398313464  |
| O | 4.500744542  | 13.110291882 | 10.356526749 |
| O | 8.435015953  | 13.086273372 | 7.399772172  |
| O | 8.431932412  | 13.094340860 | 10.357808368 |
| O | 10.971078763 | 13.113868780 | 7.400150483  |
| O | 10.970269431 | 13.117870377 | 10.356533847 |
| O | -0.027751740 | 14.409372752 | 2.964008961  |
| O | -0.027184389 | 14.410146425 | 5.924039154  |
| O | -0.026531832 | 14.408172594 | 8.881030678  |
| O | -0.027366752 | 14.409167010 | 0.009796920  |
| O | 6.465649811  | 14.425881347 | 2.935372220  |
| O | 6.468568134  | 14.415685366 | 5.944679559  |
| O | 6.465891662  | 14.389450851 | 8.873902043  |
| O | 6.467018960  | 14.402112156 | 0.010954919  |

|   |              |              |              |
|---|--------------|--------------|--------------|
| O | 9.680204150  | 15.113036898 | 8.881062973  |
| O | 3.217289261  | 15.115624738 | 8.880003869  |
| O | 9.691809254  | 15.107466524 | 5.928081802  |
| O | 9.687734018  | 15.116513068 | 2.941930432  |
| O | 3.207236190  | 15.118005050 | 2.946116928  |
| O | 9.681268583  | 15.121838767 | 0.013577305  |
| O | 3.214245596  | 15.121386565 | 0.012094938  |
| O | 3.201282254  | 15.111053423 | 5.929527261  |
| O | 1.244305349  | 16.470695099 | 10.359643849 |
| O | 5.163306087  | 16.403649513 | 4.441990076  |
| O | 5.174601278  | 16.476078663 | 7.399973039  |
| O | 7.718513220  | 16.510304227 | 1.476491295  |
| O | 7.736425295  | 16.415748244 | 4.436446607  |
| O | 5.177599872  | 16.449651266 | 10.366698786 |
| O | 11.652086483 | 16.473011832 | 1.479460288  |
| O | 11.658654789 | 16.458365981 | 4.439172857  |
| O | 1.238769392  | 16.472079567 | 4.438672465  |
| O | 1.244735278  | 16.482038017 | 1.481748251  |
| O | 5.178382188  | 16.499188482 | 1.473030191  |
| O | 7.726301694  | 16.486088905 | 7.403240611  |
| O | 7.721127086  | 16.456928292 | 10.363259921 |
| O | 1.243292222  | 16.472047062 | 7.403617502  |

|   |              |              |              |
|---|--------------|--------------|--------------|
| O | 11.656730629 | 16.458166669 | 7.404365251  |
| O | 11.655710358 | 16.459096434 | 10.359429615 |
| O | 3.214746574  | 17.749300067 | 8.897545273  |
| O | 3.233347185  | 17.762708256 | -0.005042485 |
| O | 9.667816082  | 17.752189732 | 2.970501755  |
| O | 9.692537925  | 17.723380237 | 5.909910353  |
| O | 3.230542384  | 17.750925638 | 2.970754199  |
| O | 3.209571836  | 17.728824523 | 5.911423832  |
| O | 9.685324595  | 17.744112601 | 8.896793857  |
| O | 9.655299166  | 17.767990020 | -0.010845496 |
| O | 6.449460830  | 18.764729063 | -0.026241483 |
| O | 6.450783999  | 18.482492018 | 5.790613214  |
| O | -0.057193193 | 18.513779696 | 0.002474634  |
| O | 6.435015206  | 18.514578372 | 3.089823855  |
| O | -0.055101997 | 18.505790433 | 5.933526493  |
| O | 6.438244352  | 18.462866585 | 8.925872078  |
| O | -0.055557254 | 18.511720497 | 8.880210059  |
| O | -0.058891869 | 18.509638795 | 2.956867313  |
| O | 1.974088870  | 19.916371295 | 4.438180827  |
| O | 4.485540242  | 19.986745532 | 1.472349871  |
| O | 4.438645868  | 19.998243113 | 4.471455126  |
| O | 2.003619037  | 19.974060653 | 7.415520800  |

|   |              |              |              |
|---|--------------|--------------|--------------|
| O | 1.995799389  | 19.950497203 | 10.367189004 |
| O | 4.491438197  | 19.818761340 | 7.417768306  |
| O | 4.509183235  | 20.098870964 | 10.349973742 |
| O | 8.383807999  | 19.989984529 | 1.474250178  |
| O | 8.440821687  | 19.997722330 | 4.477553521  |
| O | 10.873379088 | 19.950645079 | 1.467900403  |
| O | 10.908719664 | 19.924081236 | 4.428528938  |
| O | 8.413074753  | 19.829363803 | 7.407225293  |
| O | 8.352696056  | 20.143680059 | 10.319864808 |
| O | 10.887774835 | 19.973331271 | 7.414679006  |
| O | 10.876178694 | 19.958866158 | 10.371031732 |
| O | 1.989787783  | 19.940781285 | 1.479738402  |
| O | 6.439486081  | 21.122185995 | 2.958098893  |
| O | 6.413659411  | 21.139220373 | 6.138773129  |
| O | -0.054538932 | 21.109279300 | 2.960616941  |
| O | -0.052515926 | 21.107755886 | 5.921046384  |
| O | -0.054913139 | 21.112148606 | 8.881541362  |
| O | -0.055090696 | 21.115914814 | 0.006904819  |
| O | 6.465559019  | 21.359082446 | 8.551053450  |
| H | 0.000000000  | 0.932899949  | 9.814800036  |
| H | 0.816399984  | 0.932899949  | 8.400899982  |
| H | 6.457700016  | 0.932899949  | 6.856699960  |

|   |              |              |              |
|---|--------------|--------------|--------------|
| H | 0.834099951  | 0.932899949  | -0.439200043 |
| H | 0.000000000  | 0.932899949  | 3.900000036  |
| H | 0.816399984  | 0.932899949  | 2.486099982  |
| H | 6.457700016  | 0.932899949  | 0.941899960  |
| H | 0.834099951  | 0.932899949  | 5.475599957  |
| H | 6.494400000  | 0.932899949  | 9.814800036  |
| H | 7.310799984  | 0.932899949  | 8.400899982  |
| H | -0.036699984 | 0.932899949  | 6.856699960  |
| H | 7.328499951  | 0.932899949  | -0.439200043 |
| H | 6.494400000  | 0.932899949  | 3.900000036  |
| H | 7.310799984  | 0.932899949  | 2.486099982  |
| H | -0.036699984 | 0.932899949  | 0.941899960  |
| H | 7.328499951  | 0.932899949  | 5.475599957  |
| H | 6.367334206  | 21.550744031 | 7.304734112  |
| H | 7.382499329  | 21.652591685 | 8.723914071  |

8-c:

|    |             |             |              |
|----|-------------|-------------|--------------|
| Ti | 3.247200000 | 3.247194072 | 1.478700000  |
| Ti | 3.247200000 | 3.247194072 | 4.436100000  |
| Ti | 0.000000000 | 3.247194072 | 2.957400000  |
| Ti | 0.000000000 | 3.247194072 | 0.000000000  |
| Ti | 3.247200000 | 3.247194072 | 7.393500000  |
| Ti | 3.247200000 | 3.247194072 | 10.350900000 |

|    |             |             |              |
|----|-------------|-------------|--------------|
| Ti | 0.000000000 | 3.247194072 | 8.872200000  |
| Ti | 0.000000000 | 3.247194072 | 5.914800000  |
| Ti | 9.741600000 | 3.247194072 | 1.478700000  |
| Ti | 9.741600000 | 3.247194072 | 4.436100000  |
| Ti | 6.494400000 | 3.247194072 | 2.957400000  |
| Ti | 6.494400000 | 3.247194072 | 0.000000000  |
| Ti | 9.741600000 | 3.247194072 | 7.393500000  |
| Ti | 9.741600000 | 3.247194072 | 10.350900000 |
| Ti | 6.494400000 | 3.247194072 | 8.872200000  |
| Ti | 6.494400000 | 3.247194072 | 5.914800000  |
| Ti | 0.000000000 | 6.494391717 | 4.436100000  |
| Ti | 0.000000000 | 6.494391717 | 1.478700000  |
| Ti | 3.247200000 | 6.494391717 | 2.957400000  |
| Ti | 3.247200000 | 6.494391717 | 0.000000000  |
| Ti | 0.000000000 | 6.494391717 | 10.350900000 |
| Ti | 0.000000000 | 6.494391717 | 7.393500000  |
| Ti | 3.247200000 | 6.494391717 | 8.872200000  |
| Ti | 3.247200000 | 6.494391717 | 5.914800000  |
| Ti | 6.494400000 | 6.494391717 | 4.436100000  |
| Ti | 6.494400000 | 6.494391717 | 1.478700000  |
| Ti | 9.741600000 | 6.494391717 | 2.957400000  |
| Ti | 9.741600000 | 6.494391717 | 0.000000000  |



|    |              |              |              |
|----|--------------|--------------|--------------|
| Ti | 6.494400000  | 6.494391717  | 10.350900000 |
| Ti | 6.494400000  | 6.494391717  | 7.393500000  |
| Ti | 9.741600000  | 6.494391717  | 8.872200000  |
| Ti | 9.741600000  | 6.494391717  | 5.914800000  |
| Ti | 3.229224150  | 9.738234277  | 1.479275983  |
| Ti | 3.226854084  | 9.739480512  | 4.436188249  |
| Ti | -0.009732768 | 9.837721264  | 2.962070208  |
| Ti | -0.012497044 | 9.836848293  | 0.004159051  |
| Ti | 3.226113203  | 9.737637056  | 7.393258558  |
| Ti | 3.228092176  | 9.738342863  | 10.351130204 |
| Ti | -0.015358866 | 9.836605761  | 8.878306321  |
| Ti | -0.013897886 | 9.835633133  | 5.921380097  |
| Ti | 9.740347100  | 9.739082603  | 1.482569699  |
| Ti | 9.740551025  | 9.739515160  | 4.439574827  |
| Ti | 6.485840900  | 9.743980032  | 2.972528047  |
| Ti | 6.481890227  | 9.735529637  | 0.014804744  |
| Ti | 9.735138202  | 9.739301203  | 7.395728578  |
| Ti | 9.734891804  | 9.738245350  | 10.354130664 |
| Ti | 6.481089597  | 9.738288928  | 8.883400857  |
| Ti | 6.480188434  | 9.744711199  | 5.924769159  |
| Ti | -0.028890598 | 13.180501454 | 1.506805473  |
| Ti | -0.028673166 | 13.173110484 | 4.463854371  |

|    |              |              |              |
|----|--------------|--------------|--------------|
| Ti | 3.214118436  | 12.995897938 | 2.959824831  |
| Ti | 3.214128307  | 12.995920798 | 5.917197623  |
| Ti | 6.466785681  | 13.028794399 | 1.509075574  |
| Ti | 6.463906194  | 13.095275625 | 4.450524186  |
| Ti | 9.715459780  | 12.997511364 | 2.965421888  |
| Ti | 9.714995041  | 12.997655669 | 5.923808950  |
| Ti | -0.028230767 | 13.178490476 | 7.422541313  |
| Ti | -0.027490406 | 13.175769405 | 10.378983589 |
| Ti | 3.214406917  | 12.994409886 | 8.875274986  |
| Ti | 3.216940512  | 12.995686839 | 0.004590949  |
| Ti | 6.464150384  | 13.043048770 | 7.380582668  |
| Ti | 6.464294819  | 13.021805982 | 10.355453923 |
| Ti | 9.714276371  | 12.995648977 | 8.880135296  |
| Ti | 9.715979202  | 12.997078450 | 0.008252684  |
| Ti | 9.702629444  | 16.326027896 | 1.485676625  |
| Ti | 9.714692402  | 16.314923582 | 4.441688421  |
| Ti | 6.443463901  | 16.341852474 | 2.975713404  |
| Ti | -0.046372874 | 16.632609209 | 5.925358628  |
| Ti | 3.194048532  | 16.327755623 | 1.486350439  |
| Ti | 3.178166087  | 16.312713649 | 4.441443312  |
| Ti | -0.049130006 | 16.638944683 | 2.959399912  |
| Ti | 6.453610622  | 16.365530939 | 5.911142997  |

|    |              |              |              |
|----|--------------|--------------|--------------|
| Ti | 3.194631079  | 16.319694565 | 7.398632863  |
| Ti | 3.193068786  | 16.315687253 | 10.358315858 |
| Ti | -0.044015926 | 16.638898248 | 8.879264282  |
| Ti | 6.452424225  | 16.276593194 | 0.007280882  |
| Ti | 9.706696627  | 16.319542402 | 7.399463775  |
| Ti | 9.706759752  | 16.318966255 | 10.357755253 |
| Ti | 6.447343006  | 16.282766861 | 8.870214757  |
| Ti | -0.046628883 | 16.641175333 | 0.004235233  |
| Ti | 6.437416836  | 19.713865429 | 7.186058264  |
| Ti | 6.435408118  | 19.553241846 | 10.291995926 |
| Ti | 3.198050900  | 19.571551035 | 8.882113678  |
| Ti | 3.214936600  | 19.577960448 | 0.009437182  |
| Ti | 6.433195605  | 19.626857580 | 1.716674052  |
| Ti | 6.436203811  | 20.101223772 | 4.442525839  |
| Ti | 3.200115340  | 19.572740120 | 2.965051149  |
| Ti | 3.203442681  | 19.569173937 | 5.920138935  |
| Ti | -0.061508592 | 20.003893497 | 1.480921599  |
| Ti | -0.061093210 | 19.995153064 | 4.440197419  |
| Ti | 9.670550874  | 19.571953588 | 2.961146316  |
| Ti | 9.673659484  | 19.569977257 | 5.917974118  |
| Ti | -0.056713387 | 19.999018572 | 7.398298322  |
| Ti | -0.057108506 | 20.007755790 | 10.356659832 |

|    |             |              |             |
|----|-------------|--------------|-------------|
| Ti | 9.679926840 | 19.572952648 | 8.879933838 |
| Ti | 9.659988512 | 19.580373979 | 0.006844725 |
| O  | 0.000000000 | 1.266694833  | 2.957400000 |
| O  | 0.000000000 | 1.266694833  | 0.000000000 |
| O  | 0.000000000 | 1.266694833  | 8.872200000 |
| O  | 0.000000000 | 1.266694833  | 5.914800000 |
| O  | 6.494400000 | 1.266694833  | 2.957400000 |
| O  | 6.494400000 | 1.266694833  | 0.000000000 |
| O  | 6.494400000 | 1.266694833  | 8.872200000 |
| O  | 6.494400000 | 1.266694833  | 5.914800000 |
| O  | 9.741600000 | 1.980495667  | 8.872200000 |
| O  | 9.741600000 | 1.980495667  | 5.914800000 |
| O  | 9.741600000 | 1.980495667  | 2.957400000 |
| O  | 9.741600000 | 1.980495667  | 0.000000000 |
| O  | 3.247200000 | 1.980495667  | 8.872200000 |
| O  | 3.247200000 | 1.980495667  | 5.914800000 |
| O  | 3.247200000 | 1.980495667  | 2.957400000 |
| O  | 3.247200000 | 1.980495667  | 0.000000000 |
| O  | 1.266698949 | 3.247194072  | 1.478700000 |
| O  | 1.266698949 | 3.247194072  | 4.436100000 |
| O  | 5.227599738 | 3.247194072  | 1.478700000 |
| O  | 5.227599738 | 3.247194072  | 4.436100000 |

|   |              |             |              |
|---|--------------|-------------|--------------|
| O | 1.266698949  | 3.247194072 | 7.393500000  |
| O | 1.266698949  | 3.247194072 | 10.350900000 |
| O | 5.227599738  | 3.247194072 | 7.393500000  |
| O | 5.227599738  | 3.247194072 | 10.350900000 |
| O | 7.761098949  | 3.247194072 | 1.478700000  |
| O | 7.761098949  | 3.247194072 | 4.436100000  |
| O | 11.721999738 | 3.247194072 | 1.478700000  |
| O | 11.721999738 | 3.247194072 | 4.436100000  |
| O | 7.761098949  | 3.247194072 | 7.393500000  |
| O | 7.761098949  | 3.247194072 | 10.350900000 |
| O | 11.721999738 | 3.247194072 | 7.393500000  |
| O | 11.721999738 | 3.247194072 | 10.350900000 |
| O | 9.741600000  | 4.513896049 | 8.872200000  |
| O | 9.741600000  | 4.513896049 | 5.914800000  |
| O | 9.741600000  | 4.513896049 | 2.957400000  |
| O | 9.741600000  | 4.513896049 | 0.000000000  |
| O | 3.247200000  | 4.513896049 | 8.872200000  |
| O | 3.247200000  | 4.513896049 | 5.914800000  |
| O | 3.247200000  | 4.513896049 | 2.957400000  |
| O | 3.247200000  | 4.513896049 | 0.000000000  |
| O | 0.000000000  | 5.227596870 | 2.957400000  |
| O | 0.000000000  | 5.227596870 | 0.000000000  |

|   |              |             |              |
|---|--------------|-------------|--------------|
| O | 0.000000000  | 5.227596870 | 8.872200000  |
| O | 0.000000000  | 5.227596870 | 5.914800000  |
| O | 6.494400000  | 5.227596870 | 0.000000000  |
| O | 6.494400000  | 5.227596870 | 2.957400000  |
| O | 6.494400000  | 5.227596870 | 8.872200000  |
| O | 6.494400000  | 5.227596870 | 5.914800000  |
| O | 8.474899752  | 6.494391717 | 7.393500000  |
| O | 11.008298949 | 6.494391717 | 7.393500000  |
| O | 8.474899752  | 6.494391717 | 10.350900000 |
| O | 11.008298949 | 6.494391717 | 10.350900000 |
| O | 8.474899752  | 6.494391717 | 1.478700000  |
| O | 11.008298949 | 6.494391717 | 1.478700000  |
| O | 8.474899752  | 6.494391717 | 4.436100000  |
| O | 11.008298949 | 6.494391717 | 4.436100000  |
| O | 1.980499752  | 6.494391717 | 1.478700000  |
| O | 4.513898949  | 6.494391717 | 1.478700000  |
| O | 1.980499752  | 6.494391717 | 4.436100000  |
| O | 4.513898949  | 6.494391717 | 4.436100000  |
| O | 1.980499752  | 6.494391717 | 7.393500000  |
| O | 4.513898949  | 6.494391717 | 7.393500000  |
| O | 1.980499752  | 6.494391717 | 10.350900000 |
| O | 4.513898949  | 6.494391717 | 10.350900000 |

|   |             |             |              |
|---|-------------|-------------|--------------|
| O | 0.000000000 | 7.761086550 | 8.872200000  |
| O | 0.000000000 | 7.761086550 | 5.914800000  |
| O | 6.494400000 | 7.761086550 | 2.957400000  |
| O | 6.494400000 | 7.761086550 | 0.000000000  |
| O | 0.000000000 | 7.761086550 | 2.957400000  |
| O | 0.000000000 | 7.761086550 | 0.000000000  |
| O | 6.494400000 | 7.761086550 | 8.872200000  |
| O | 6.494400000 | 7.761086550 | 5.914800000  |
| O | 3.247200000 | 8.474887384 | 2.957400000  |
| O | 3.247200000 | 8.474887384 | 0.000000000  |
| O | 3.247200000 | 8.474887384 | 8.872200000  |
| O | 3.247200000 | 8.474887384 | 5.914800000  |
| O | 9.741600000 | 8.474887384 | 2.957400000  |
| O | 9.741600000 | 8.474887384 | 0.000000000  |
| O | 9.741600000 | 8.474887384 | 8.872200000  |
| O | 9.741600000 | 8.474887384 | 5.914800000  |
| O | 1.270656507 | 9.788252271 | 1.480796915  |
| O | 1.269726379 | 9.787983665 | 4.439279915  |
| O | 5.212032402 | 9.775493454 | 1.484957977  |
| O | 5.211236578 | 9.771111093 | 4.440800610  |
| O | 1.269145390 | 9.788255486 | 7.395681970  |
| O | 1.269161626 | 9.786720642 | 10.352423416 |

|   |              |              |              |
|---|--------------|--------------|--------------|
| O | 5.211038499  | 9.774928737  | 7.398535388  |
| O | 5.211499991  | 9.772609861  | 10.356562475 |
| O | 7.760112190  | 9.782858349  | 1.484067681  |
| O | 7.760193240  | 9.778920689  | 4.442080691  |
| O | 11.702076997 | 9.780519828  | 1.481544664  |
| O | 11.701984257 | 9.780529472  | 4.437956656  |
| O | 7.758907479  | 9.782750478  | 7.398075689  |
| O | 7.759158812  | 9.780629485  | 10.356153762 |
| O | 11.700666154 | 9.780400169  | 7.395635243  |
| O | 11.701208047 | 9.779252519  | 10.353377237 |
| O | 9.724861593  | 11.073749572 | 2.960440444  |
| O | 9.725641441  | 11.073722783 | 0.001851332  |
| O | 3.244054502  | 11.073312729 | 2.959849792  |
| O | 3.244189326  | 11.072833738 | 0.000988836  |
| O | 3.244237904  | 11.072501552 | 8.874530195  |
| O | 3.244963718  | 11.073235576 | 5.915823615  |
| O | 9.724821588  | 11.073086986 | 8.875557832  |
| O | 9.724622729  | 11.073999962 | 5.916711072  |
| O | 6.465938941  | 11.789760696 | 8.877678169  |
| O | -0.025838230 | 11.799895241 | 2.958359144  |
| O | 6.466688135  | 11.789688187 | 0.005293036  |
| O | 6.465970115  | 11.796014732 | 5.910110747  |



|   |              |              |              |
|---|--------------|--------------|--------------|
| O | -0.026273225 | 11.799175146 | -0.000808198 |
| O | -0.027340645 | 11.799860236 | 5.914454694  |
| O | 6.467329912  | 11.794932447 | 2.975440850  |
| O | -0.027083207 | 11.799457326 | 8.872923262  |
| O | 8.434009970  | 13.091078288 | 1.482978530  |
| O | 8.435675914  | 13.102964134 | 4.441012715  |
| O | 10.971059800 | 13.114966067 | 1.482708697  |
| O | 10.971126692 | 13.115360761 | 4.440543079  |
| O | 1.960797691  | 13.097688085 | 1.480947506  |
| O | 1.961065909  | 13.099404024 | 4.438844704  |
| O | 4.498189255  | 13.105935596 | 1.482142059  |
| O | 4.495859454  | 13.120456073 | 4.439162447  |
| O | 1.960806393  | 13.097236240 | 7.398301753  |
| O | 1.962097870  | 13.101268912 | 10.355014926 |
| O | 4.496444730  | 13.108602017 | 7.398170208  |
| O | 4.499431244  | 13.111604911 | 10.355148956 |
| O | 8.434937890  | 13.091347252 | 7.399551668  |
| O | 8.433005547  | 13.095091315 | 10.356856913 |
| O | 10.970519855 | 13.114756754 | 7.400093701  |
| O | 10.969890548 | 13.117671065 | 10.356274187 |
| O | -0.027154775 | 14.411861650 | 2.965757376  |
| O | -0.027230370 | 14.411504103 | 5.923450513  |

|   |              |              |              |
|---|--------------|--------------|--------------|
| O | -0.026927861 | 14.410456108 | 8.880293339  |
| O | -0.026482605 | 14.409706367 | 0.008819677  |
| O | 6.466280807  | 14.413382207 | 2.946886443  |
| O | 6.468569044  | 14.417460242 | 5.933368923  |
| O | 6.466502785  | 14.400397645 | 8.878085936  |
| O | 6.467238341  | 14.404789650 | 0.008482296  |
| O | 9.684439409  | 15.116063367 | 8.879405173  |
| O | 3.209254390  | 15.115305767 | 8.878345714  |
| O | 9.694159057  | 15.113260856 | 5.926106377  |
| O | 9.690398540  | 15.115179322 | 2.955037865  |
| O | 3.202812594  | 15.115044661 | 2.954179155  |
| O | 9.681986993  | 15.118689425 | 0.008098308  |
| O | 3.210329992  | 15.117144937 | 0.009996249  |
| O | 3.195159853  | 15.113214064 | 5.927251719  |
| O | 1.244244301  | 16.473225431 | 10.358714752 |
| O | 5.163837199  | 16.408375134 | 4.446080988  |
| O | 5.171124046  | 16.451999788 | 7.398492091  |
| O | 7.723446886  | 16.486449310 | 1.481929717  |
| O | 7.733832081  | 16.429653284 | 4.441609163  |
| O | 5.175033805  | 16.452134806 | 10.358575873 |
| O | 11.654295748 | 16.466163433 | 1.481188356  |
| O | 11.656336418 | 16.465220452 | 4.442208805  |

|   |              |              |              |
|---|--------------|--------------|--------------|
| O | 1.240620426  | 16.479549833 | 4.441290119  |
| O | 1.243684224  | 16.481853350 | 1.482510078  |
| O | 5.173770254  | 16.473129347 | 1.479359855  |
| O | 7.728064534  | 16.465885539 | 7.400560497  |
| O | 7.723091642  | 16.468072255 | 10.356440866 |
| O | 1.244843864  | 16.480792853 | 7.403457093  |
| O | 11.654858163 | 16.465257600 | 7.403831736  |
| O | 11.655183143 | 16.461271005 | 10.358156277 |
| O | 3.228854359  | 17.749506166 | 8.888803672  |
| O | 3.225453372  | 17.754890444 | -0.005576710 |
| O | 9.675461550  | 17.747211579 | 2.966627443  |
| O | 9.670869360  | 17.746263954 | 5.921250563  |
| O | 3.227375065  | 17.747479828 | 2.969114498  |
| O | 3.232115977  | 17.745577436 | 5.921028758  |
| O | 9.673232672  | 17.750256264 | 8.886478800  |
| O | 9.675413102  | 17.756826412 | -0.005299069 |
| O | 6.434606709  | 18.595024288 | -0.003564495 |
| O | 6.434982345  | 18.508153957 | 5.847741665  |
| O | -0.058934991 | 18.518813928 | 0.000857528  |
| O | 6.430883079  | 18.475675766 | 3.088766525  |
| O | -0.060694065 | 18.507749619 | 5.929703522  |
| O | 6.433964932  | 18.500742628 | 8.843986759  |

|   |              |              |              |
|---|--------------|--------------|--------------|
| O | -0.057904980 | 18.514776255 | 8.889276737  |
| O | -0.063003084 | 18.512051612 | 2.954270124  |
| O | 1.969491614  | 19.911006305 | 4.446917578  |
| O | 4.488327119  | 19.946934592 | 1.456502939  |
| O | 4.428812957  | 20.005302968 | 4.446450663  |
| O | 1.987031170  | 19.942195399 | 7.412059696  |
| O | 2.004425641  | 19.974452490 | 10.359607887 |
| O | 4.476554980  | 19.989974170 | 7.442354000  |
| O | 4.534988604  | 20.072802542 | 10.357865623 |
| O | 8.383028930  | 19.936002800 | 1.454060836  |
| O | 8.441761427  | 19.989165135 | 4.445253981  |
| O | 10.878651632 | 19.967723035 | 1.471736388  |
| O | 10.900398260 | 19.927743502 | 4.443669051  |
| O | 8.399255838  | 19.980940842 | 7.440732517  |
| O | 8.340170956  | 20.067401833 | 10.354858539 |
| O | 10.886505699 | 19.955443566 | 7.410240304  |
| O | 10.870755091 | 19.982616419 | 10.358186679 |
| O | 1.992115636  | 19.950605074 | 1.474399940  |
| O | 6.440692091  | 21.080857713 | 2.876329858  |
| O | 6.441128775  | 21.132597004 | 5.988850693  |
| O | -0.053511778 | 21.110544824 | 2.962507666  |
| O | -0.054109652 | 21.109631490 | 5.920788853  |

|   |              |              |              |
|---|--------------|--------------|--------------|
| O | -0.054614137 | 21.116464529 | 8.876541108  |
| O | -0.053582437 | 21.120046428 | 0.004770286  |
| O | 6.438241754  | 21.429635635 | 9.004867781  |
| H | 0.000000000  | 0.932897449  | 9.814799089  |
| H | 0.816399334  | 0.932897449  | 8.400899272  |
| H | 6.457698847  | 0.932897449  | 6.856699960  |
| H | 0.834099172  | 0.932897449  | -0.439201108 |
| H | 0.000000000  | 0.932897449  | 3.899999089  |
| H | 0.816399334  | 0.932897449  | 2.486099272  |
| H | 6.457698847  | 0.932897449  | 0.941899960  |
| H | 0.834099172  | 0.932897449  | 5.475598892  |
| H | 6.494400000  | 0.932897449  | 9.814799089  |
| H | 7.310799334  | 0.932897449  | 8.400899272  |
| H | -0.036701153 | 0.932897449  | 6.856699960  |
| H | 7.328499172  | 0.932897449  | -0.439201108 |
| H | 6.494400000  | 0.932897449  | 3.899999089  |
| H | 7.310799334  | 0.932897449  | 2.486099272  |
| H | -0.036701153 | 0.932897449  | 0.941899960  |
| H | 7.328499172  | 0.932897449  | 5.475598892  |
| H | 5.639568885  | 21.948657689 | 8.795385794  |
| H | 7.239082194  | 21.948617326 | 8.797348916  |

TS8-3:

|    |             |             |              |
|----|-------------|-------------|--------------|
| Ti | 3.247200000 | 3.247190143 | 1.478700000  |
| Ti | 3.247200000 | 3.247190143 | 4.436100000  |
| Ti | 0.000000000 | 3.247190143 | 2.957400000  |
| Ti | 0.000000000 | 3.247190143 | 0.000000000  |
| Ti | 3.247200000 | 3.247190143 | 7.393500000  |
| Ti | 3.247200000 | 3.247190143 | 10.350900000 |
| Ti | 0.000000000 | 3.247190143 | 8.872200000  |
| Ti | 0.000000000 | 3.247190143 | 5.914800000  |
| Ti | 9.741600000 | 3.247190143 | 1.478700000  |
| Ti | 9.741600000 | 3.247190143 | 4.436100000  |
| Ti | 6.494400000 | 3.247190143 | 2.957400000  |
| Ti | 6.494400000 | 3.247190143 | 0.000000000  |
| Ti | 9.741600000 | 3.247190143 | 7.393500000  |
| Ti | 9.741600000 | 3.247190143 | 10.350900000 |
| Ti | 6.494400000 | 3.247190143 | 8.872200000  |
| Ti | 6.494400000 | 3.247190143 | 5.914800000  |
| Ti | 0.000000000 | 6.494389931 | 4.436100000  |
| Ti | 0.000000000 | 6.494389931 | 1.478700000  |
| Ti | 3.247200000 | 6.494389931 | 2.957400000  |
| Ti | 3.247200000 | 6.494389931 | 0.000000000  |
| Ti | 0.000000000 | 6.494389931 | 10.350900000 |
| Ti | 0.000000000 | 6.494389931 | 7.393500000  |

|    |              |             |              |
|----|--------------|-------------|--------------|
| Ti | 3.247200000  | 6.494389931 | 8.872200000  |
| Ti | 3.247200000  | 6.494389931 | 5.914800000  |
| Ti | 6.494400000  | 6.494389931 | 4.436100000  |
| Ti | 6.494400000  | 6.494389931 | 1.478700000  |
| Ti | 9.741600000  | 6.494389931 | 2.957400000  |
| Ti | 9.741600000  | 6.494389931 | 0.000000000  |
| Ti | 6.494400000  | 6.494389931 | 10.350900000 |
| Ti | 6.494400000  | 6.494389931 | 7.393500000  |
| Ti | 9.741600000  | 6.494389931 | 8.872200000  |
| Ti | 9.741600000  | 6.494389931 | 5.914800000  |
| Ti | 3.231109215  | 9.738427874 | 1.478756545  |
| Ti | 3.232752428  | 9.738369652 | 4.436224447  |
| Ti | -0.007144100 | 9.838361348 | 2.956922321  |
| Ti | -0.011716937 | 9.837249060 | -0.000016680 |
| Ti | 3.228277786  | 9.739428006 | 7.393581388  |
| Ti | 3.228677322  | 9.739060100 | 10.350827603 |
| Ti | -0.013311961 | 9.837176193 | 8.874173769  |
| Ti | -0.005794953 | 9.838850341 | 5.915103074  |
| Ti | 9.740296054  | 9.740000938 | 1.481707439  |
| Ti | 9.745771483  | 9.738780421 | 4.438016395  |
| Ti | 6.486525150  | 9.747987343 | 2.970747574  |
| Ti | 6.483165208  | 9.736756584 | 0.010491081  |

|    |              |              |              |
|----|--------------|--------------|--------------|
| Ti | 9.741865491  | 9.737247005  | 7.396089263  |
| Ti | 9.734354588  | 9.738242850  | 10.354041114 |
| Ti | 6.479604848  | 9.748804951  | 8.877275017  |
| Ti | 6.489047316  | 9.754883963  | 5.924002956  |
| Ti | -0.024008498 | 13.177183876 | 1.506666712  |
| Ti | -0.024290874 | 13.179771716 | 4.464784414  |
| Ti | 3.220929892  | 12.996987724 | 2.965857927  |
| Ti | 3.218338497  | 12.998253605 | 5.922417198  |
| Ti | 6.470794155  | 13.015023306 | 1.507076963  |
| Ti | 6.468665161  | 13.102738748 | 4.470385611  |
| Ti | 9.718234188  | 12.996776268 | 2.967621957  |
| Ti | 9.719027024  | 12.993918750 | 5.924633118  |
| Ti | -0.023792884 | 13.178584417 | 7.422722897  |
| Ti | -0.023961478 | 13.179330944 | 10.379889973 |
| Ti | 3.220677650  | 12.997495648 | 8.880555128  |
| Ti | 3.221994974  | 12.995927585 | 0.009023619  |
| Ti | 6.467637487  | 13.102305834 | 7.371501558  |
| Ti | 6.469730112  | 13.017712587 | 10.334374404 |
| Ti | 9.718247436  | 12.993649429 | 8.882277873  |
| Ti | 9.717998052  | 12.997013442 | 0.009885878  |
| Ti | 9.710136321  | 16.320134623 | 1.484011017  |
| Ti | 9.719763749  | 16.318296525 | 4.440112245  |



|    |              |              |              |
|----|--------------|--------------|--------------|
| Ti | 6.463721623  | 16.316311264 | 2.972496936  |
| Ti | -0.041847965 | 16.641128898 | 5.918444463  |
| Ti | 3.202987683  | 16.313253363 | 1.478295546  |
| Ti | 3.197030500  | 16.324746300 | 4.440293238  |
| Ti | -0.036546067 | 16.638271380 | 2.957089710  |
| Ti | 6.450641772  | 16.456814349 | 5.918961062  |
| Ti | 3.196391711  | 16.333372789 | 7.397103769  |
| Ti | 3.199273926  | 16.319275224 | 10.350621176 |
| Ti | -0.039947704 | 16.640853148 | 8.877505576  |
| Ti | 6.452728812  | 16.268472842 | 0.006250287  |
| Ti | 9.716199622  | 16.304186815 | 7.397391702  |
| Ti | 9.709040715  | 16.321978794 | 10.357623353 |
| Ti | 6.457238264  | 16.321955219 | 8.867506015  |
| Ti | -0.040780286 | 16.642320483 | 0.003383620  |
| Ti | 6.418980013  | 19.939615060 | 7.289031501  |
| Ti | 6.425697950  | 19.567387632 | 10.212800776 |
| Ti | 3.203062759  | 19.579018444 | 8.875758817  |
| Ti | 3.221756889  | 19.562184806 | -0.022273599 |
| Ti | 6.428105295  | 19.619417675 | 1.721282746  |
| Ti | 6.658352297  | 19.926128290 | 4.541159269  |
| Ti | 3.123951355  | 19.560397428 | 2.907728574  |
| Ti | 3.216902715  | 19.613117920 | 5.912492400  |

|    |              |              |              |
|----|--------------|--------------|--------------|
| Ti | -0.070648291 | 20.013660851 | 1.466930494  |
| Ti | -0.046832287 | 20.000792376 | 4.435745112  |
| Ti | 9.736002607  | 19.574058507 | 2.933340605  |
| Ti | 9.754791166  | 19.563398537 | 5.968072356  |
| Ti | -0.030366645 | 20.006439546 | 7.395169393  |
| Ti | -0.069599056 | 20.006785663 | 10.350349450 |
| Ti | 9.674805226  | 19.562294106 | 8.892961303  |
| Ti | 9.629129461  | 19.579019873 | 0.002758426  |
| O  | 0.000000000  | 1.266689833  | 2.957400000  |
| O  | 0.000000000  | 1.266689833  | 0.000000000  |
| O  | 0.000000000  | 1.266689833  | 8.872200000  |
| O  | 0.000000000  | 1.266689833  | 5.914800000  |
| O  | 6.494400000  | 1.266689833  | 2.957400000  |
| O  | 6.494400000  | 1.266689833  | 0.000000000  |
| O  | 6.494400000  | 1.266689833  | 8.872200000  |
| O  | 6.494400000  | 1.266689833  | 5.914800000  |
| O  | 9.741600000  | 1.980499953  | 8.872200000  |
| O  | 9.741600000  | 1.980499953  | 5.914800000  |
| O  | 9.741600000  | 1.980499953  | 2.957400000  |
| O  | 9.741600000  | 1.980499953  | 0.000000000  |
| O  | 3.247200000  | 1.980499953  | 8.872200000  |
| O  | 3.247200000  | 1.980499953  | 5.914800000  |

|   |              |             |              |
|---|--------------|-------------|--------------|
| O | 3.247200000  | 1.980499953 | 2.957400000  |
| O | 3.247200000  | 1.980499953 | 0.000000000  |
| O | 1.266699988  | 3.247190143 | 1.478700000  |
| O | 1.266699988  | 3.247190143 | 4.436100000  |
| O | 5.227599998  | 3.247190143 | 1.478700000  |
| O | 5.227599998  | 3.247190143 | 4.436100000  |
| O | 1.266699988  | 3.247190143 | 7.393500000  |
| O | 1.266699988  | 3.247190143 | 10.350900000 |
| O | 5.227599998  | 3.247190143 | 7.393500000  |
| O | 5.227599998  | 3.247190143 | 10.350900000 |
| O | 7.761099988  | 3.247190143 | 1.478700000  |
| O | 7.761099988  | 3.247190143 | 4.436100000  |
| O | 11.721999998 | 3.247190143 | 1.478700000  |
| O | 11.721999998 | 3.247190143 | 4.436100000  |
| O | 7.761099988  | 3.247190143 | 7.393500000  |
| O | 7.761099988  | 3.247190143 | 10.350900000 |
| O | 11.721999998 | 3.247190143 | 7.393500000  |
| O | 11.721999998 | 3.247190143 | 10.350900000 |
| O | 9.741600000  | 4.513899978 | 8.872200000  |
| O | 9.741600000  | 4.513899978 | 5.914800000  |
| O | 9.741600000  | 4.513899978 | 2.957400000  |
| O | 9.741600000  | 4.513899978 | 0.000000000  |

|   |              |             |              |
|---|--------------|-------------|--------------|
| O | 3.247200000  | 4.513899978 | 8.872200000  |
| O | 3.247200000  | 4.513899978 | 5.914800000  |
| O | 3.247200000  | 4.513899978 | 2.957400000  |
| O | 3.247200000  | 4.513899978 | 0.000000000  |
| O | 0.000000000  | 5.227600085 | 2.957400000  |
| O | 0.000000000  | 5.227600085 | 0.000000000  |
| O | 0.000000000  | 5.227600085 | 8.872200000  |
| O | 0.000000000  | 5.227600085 | 5.914800000  |
| O | 6.494400000  | 5.227600085 | 0.000000000  |
| O | 6.494400000  | 5.227600085 | 2.957400000  |
| O | 6.494400000  | 5.227600085 | 8.872200000  |
| O | 6.494400000  | 5.227600085 | 5.914800000  |
| O | 8.474900012  | 6.494389931 | 7.393500000  |
| O | 11.008299988 | 6.494389931 | 7.393500000  |
| O | 8.474900012  | 6.494389931 | 10.350900000 |
| O | 11.008299988 | 6.494389931 | 10.350900000 |
| O | 8.474900012  | 6.494389931 | 1.478700000  |
| O | 11.008299988 | 6.494389931 | 1.478700000  |
| O | 8.474900012  | 6.494389931 | 4.436100000  |
| O | 11.008299988 | 6.494389931 | 4.436100000  |
| O | 1.980500012  | 6.494389931 | 1.478700000  |
| O | 4.513899988  | 6.494389931 | 1.478700000  |

|   |             |             |              |
|---|-------------|-------------|--------------|
| O | 1.980500012 | 6.494389931 | 4.436100000  |
| O | 4.513899988 | 6.494389931 | 4.436100000  |
| O | 1.980500012 | 6.494389931 | 7.393500000  |
| O | 4.513899988 | 6.494389931 | 7.393500000  |
| O | 1.980500012 | 6.494389931 | 10.350900000 |
| O | 4.513899988 | 6.494389931 | 10.350900000 |
| O | 0.000000000 | 7.761090122 | 8.872200000  |
| O | 0.000000000 | 7.761090122 | 5.914800000  |
| O | 6.494400000 | 7.761090122 | 2.957400000  |
| O | 6.494400000 | 7.761090122 | 0.000000000  |
| O | 0.000000000 | 7.761090122 | 2.957400000  |
| O | 0.000000000 | 7.761090122 | 0.000000000  |
| O | 6.494400000 | 7.761090122 | 8.872200000  |
| O | 6.494400000 | 7.761090122 | 5.914800000  |
| O | 3.247200000 | 8.474889884 | 2.957400000  |
| O | 3.247200000 | 8.474889884 | 0.000000000  |
| O | 3.247200000 | 8.474889884 | 8.872200000  |
| O | 3.247200000 | 8.474889884 | 5.914800000  |
| O | 9.741600000 | 8.474889884 | 2.957400000  |
| O | 9.741600000 | 8.474889884 | 0.000000000  |
| O | 9.741600000 | 8.474889884 | 8.872200000  |
| O | 9.741600000 | 8.474889884 | 5.914800000  |

|   |              |              |              |
|---|--------------|--------------|--------------|
| O | 1.271872648  | 9.787147841  | 1.478350435  |
| O | 1.272837716  | 9.787910083  | 4.435993652  |
| O | 5.213369209  | 9.775989590  | 1.483142370  |
| O | 5.214155291  | 9.775574536  | 4.441210742  |
| O | 1.271877714  | 9.788096537  | 7.394395974  |
| O | 1.270734050  | 9.787037826  | 10.350731192 |
| O | 5.212993183  | 9.776384642  | 7.394876965  |
| O | 5.212343613  | 9.775575607  | 10.355098680 |
| O | 7.760815534  | 9.782617246  | 1.482055466  |
| O | 7.762223909  | 9.781916440  | 4.440132592  |
| O | 11.703606688 | 9.781418160  | 1.479217663  |
| O | 11.704578640 | 9.781827499  | 4.436438208  |
| O | 7.760892427  | 9.781868219  | 7.397585826  |
| O | 7.759582377  | 9.782698328  | 10.353737803 |
| O | 11.703513818 | 9.781656763  | 7.392525714  |
| O | 11.702207015 | 9.781807140  | 10.351206860 |
| O | 9.727576772  | 11.072913391 | 2.958960561  |
| O | 9.727041893  | 11.073202001 | 0.002047940  |
| O | 3.245883845  | 11.074010321 | 2.959449833  |
| O | 3.245017752  | 11.073249507 | 0.001517264  |
| O | 3.246016071  | 11.074466809 | 8.873457605  |
| O | 3.246263637  | 11.075998082 | 5.915982369  |

|   |              |              |              |
|---|--------------|--------------|--------------|
| O | 9.726603781  | 11.072231516 | 8.874013478  |
| O | 9.725940962  | 11.072510124 | 5.917209690  |
| O | 6.469144577  | 11.796604095 | 8.866729993  |
| O | -0.020499703 | 11.799975251 | 2.955698549  |
| O | 6.469067034  | 11.791846685 | 0.004199271  |
| O | 6.471290587  | 11.806665772 | 5.919608614  |
| O | -0.020761038 | 11.800072407 | -0.001155989 |
| O | -0.020203429 | 11.800334941 | 5.913254108  |
| O | 6.470464759  | 11.795382506 | 2.973015190  |
| O | -0.021512570 | 11.800187065 | 8.870742712  |
| O | 8.438473961  | 13.093793288 | 1.482741819  |
| O | 8.441154850  | 13.099486535 | 4.439649353  |
| O | 10.974592623 | 13.116178369 | 1.482791504  |
| O | 10.975480668 | 13.111882805 | 4.440101007  |
| O | 1.966585240  | 13.103623507 | 1.482399944  |
| O | 1.965670829  | 13.103926403 | 4.440018555  |
| O | 4.502566611  | 13.109314968 | 1.483472179  |
| O | 4.499127436  | 13.119098038 | 4.439766348  |
| O | 1.965654203  | 13.102462640 | 7.397593515  |
| O | 1.966845796  | 13.104739367 | 10.355058696 |
| O | 4.499065740  | 13.118966235 | 7.397856842  |
| O | 4.502017964  | 13.110931251 | 10.354788863 |

|   |              |              |              |
|---|--------------|--------------|--------------|
| O | 8.441080813  | 13.101921140 | 7.400690149  |
| O | 8.437875178  | 13.092407391 | 10.357483409 |
| O | 10.975079314 | 13.113621247 | 7.399403917  |
| O | 10.974706925 | 13.114379204 | 10.356417444 |
| O | -0.021737926 | 14.411717702 | 2.964832064  |
| O | -0.022386846 | 14.412414580 | 5.922074849  |
| O | -0.021646615 | 14.412157403 | 8.878885025  |
| O | -0.023086293 | 14.410815084 | 0.007406276  |
| O | 6.474417251  | 14.408146876 | 2.951251684  |
| O | 6.471606994  | 14.433183377 | 5.920675407  |
| O | 6.472070304  | 14.412223483 | 8.888800123  |
| O | 6.469226537  | 14.406454154 | 0.005335623  |
| O | 9.690508166  | 15.113072260 | 8.887090864  |
| O | 3.214550573  | 15.121768044 | 8.868044262  |
| O | 9.704861309  | 15.110318684 | 5.915960247  |
| O | 9.691943168  | 15.115228614 | 2.960531532  |
| O | 3.214522777  | 15.118396173 | 2.960720924  |
| O | 9.690256572  | 15.117433904 | 0.002959766  |
| O | 3.219312397  | 15.112672564 | 0.000683396  |
| O | 3.203458917  | 15.128838258 | 5.920167799  |
| O | 1.248213029  | 16.471839892 | 10.353969899 |
| O | 5.177261514  | 16.430855942 | 4.442304152  |



|   |              |              |              |
|---|--------------|--------------|--------------|
| O | 5.175255264  | 16.443307933 | 7.395743247  |
| O | 7.731089755  | 16.475613959 | 1.478178433  |
| O | 7.743160767  | 16.452773461 | 4.452043225  |
| O | 5.179347775  | 16.468388368 | 10.361900463 |
| O | 11.661554799 | 16.463575951 | 1.479688955  |
| O | 11.663775364 | 16.468162624 | 4.436162224  |
| O | 1.251756763  | 16.489484351 | 4.441451948  |
| O | 1.251405027  | 16.476852693 | 1.480044671  |
| O | 5.182681480  | 16.475848990 | 1.483363465  |
| O | 7.738061234  | 16.452662375 | 7.393619479  |
| O | 7.727793198  | 16.483317113 | 10.363019189 |
| O | 1.252887828  | 16.493819920 | 7.393253353  |
| O | 11.663342058 | 16.461286007 | 7.401810412  |
| O | 11.659967308 | 16.469949287 | 10.355587597 |
| O | 3.230767739  | 17.753946391 | 8.875906332  |
| O | 3.217981435  | 17.740032065 | -0.004357670 |
| O | 9.689526212  | 17.751598226 | 2.954811092  |
| O | 9.690120320  | 17.743538240 | 5.931533916  |
| O | 3.231768007  | 17.745671019 | 2.957821134  |
| O | 3.272026792  | 17.787276838 | 5.900628494  |
| O | 9.677842917  | 17.739721310 | 8.879102572  |
| O | 9.671855080  | 17.756872847 | 0.008508913  |

|   |              |              |              |
|---|--------------|--------------|--------------|
| O | 6.450529808  | 18.688901253 | 0.025309784  |
| O | 6.431246376  | 18.552374405 | 5.926148254  |
| O | -0.054363583 | 18.518623546 | 0.001009893  |
| O | 6.475891220  | 18.445038173 | 3.085436966  |
| O | -0.063249091 | 18.511075770 | 5.922811833  |
| O | 6.434534101  | 18.458040951 | 8.804565090  |
| O | -0.044477678 | 18.515462417 | 8.878426155  |
| O | -0.051866357 | 18.512773135 | 2.943629991  |
| O | 1.972890004  | 19.894558432 | 4.439388037  |
| O | 4.468667401  | 19.927275941 | 1.457961173  |
| O | 4.413406812  | 20.236647262 | 4.303221297  |
| O | 1.997976702  | 19.934712988 | 7.363222375  |
| O | 1.992495558  | 19.955989352 | 10.341590815 |
| O | 4.460800475  | 20.014432380 | 7.411063407  |
| O | 4.499801165  | 19.975047211 | 10.352249757 |
| O | 8.374200053  | 19.994518695 | 1.507702512  |
| O | 8.518513675  | 20.027304784 | 4.447144943  |
| O | 10.887837181 | 19.984151263 | 1.455864732  |
| O | 10.926607190 | 19.926938754 | 4.440865436  |
| O | 8.446822512  | 19.984687048 | 7.415792999  |
| O | 8.374605174  | 20.013174358 | 10.363225142 |
| O | 10.928742419 | 19.944961833 | 7.433765356  |

|   |              |              |              |
|---|--------------|--------------|--------------|
| O | 10.879590852 | 19.963196013 | 10.372540242 |
| O | 1.973649199  | 19.964380454 | 1.438018006  |
| O | 6.246600843  | 21.050100461 | 3.010423343  |
| O | 6.481979980  | 21.152420677 | 5.926467180  |
| O | -0.044781616 | 21.113778462 | 2.954700604  |
| O | -0.041006421 | 21.114986121 | 5.915547276  |
| O | -0.033978441 | 21.118886276 | 8.872485448  |
| O | -0.053182901 | 21.126067218 | -0.007003005 |
| O | 6.439604799  | 21.165654914 | 8.966575366  |
| H | 0.000000000  | 0.932899949  | 9.814800036  |
| H | 0.816399984  | 0.932899949  | 8.400899982  |
| H | 6.457700016  | 0.932899949  | 6.856699960  |
| H | 0.834099951  | 0.932899949  | -0.439200043 |
| H | 0.000000000  | 0.932899949  | 3.900000036  |
| H | 0.816399984  | 0.932899949  | 2.486099982  |
| H | 6.457700016  | 0.932899949  | 0.941899960  |
| H | 0.834099951  | 0.932899949  | 5.475599957  |
| H | 6.494400000  | 0.932899949  | 9.814800036  |
| H | 7.310799984  | 0.932899949  | 8.400899982  |
| H | -0.036699984 | 0.932899949  | 6.856699960  |
| H | 7.328499951  | 0.932899949  | -0.439200043 |
| H | 6.494400000  | 0.932899949  | 3.900000036  |

|   |              |              |             |
|---|--------------|--------------|-------------|
| H | 7.310799984  | 0.932899949  | 2.486099982 |
| H | -0.036699984 | 0.932899949  | 0.941899960 |
| H | 7.328499951  | 0.932899949  | 5.475599957 |
| H | 5.093166697  | 20.900729784 | 3.630319343 |
| H | 7.258832704  | 21.693119862 | 8.996571209 |

8-d:

|    |             |             |              |
|----|-------------|-------------|--------------|
| Ti | 3.247200000 | 3.247194072 | 1.478700000  |
| Ti | 3.247200000 | 3.247194072 | 4.436100000  |
| Ti | 0.000000000 | 3.247194072 | 2.957400000  |
| Ti | 0.000000000 | 3.247194072 | 0.000000000  |
| Ti | 3.247200000 | 3.247194072 | 7.393500000  |
| Ti | 3.247200000 | 3.247194072 | 10.350900000 |
| Ti | 0.000000000 | 3.247194072 | 8.872200000  |
| Ti | 0.000000000 | 3.247194072 | 5.914800000  |
| Ti | 9.741600000 | 3.247194072 | 1.478700000  |
| Ti | 9.741600000 | 3.247194072 | 4.436100000  |
| Ti | 6.494400000 | 3.247194072 | 2.957400000  |
| Ti | 6.494400000 | 3.247194072 | 0.000000000  |
| Ti | 9.741600000 | 3.247194072 | 7.393500000  |
| Ti | 9.741600000 | 3.247194072 | 10.350900000 |
| Ti | 6.494400000 | 3.247194072 | 8.872200000  |
| Ti | 6.494400000 | 3.247194072 | 5.914800000  |

|    |              |             |              |
|----|--------------|-------------|--------------|
| Ti | 0.000000000  | 6.494391717 | 4.436100000  |
| Ti | 0.000000000  | 6.494391717 | 1.478700000  |
| Ti | 3.247200000  | 6.494391717 | 2.957400000  |
| Ti | 3.247200000  | 6.494391717 | 0.000000000  |
| Ti | 0.000000000  | 6.494391717 | 10.350900000 |
| Ti | 0.000000000  | 6.494391717 | 7.393500000  |
| Ti | 3.247200000  | 6.494391717 | 8.872200000  |
| Ti | 3.247200000  | 6.494391717 | 5.914800000  |
| Ti | 6.494400000  | 6.494391717 | 4.436100000  |
| Ti | 6.494400000  | 6.494391717 | 1.478700000  |
| Ti | 9.741600000  | 6.494391717 | 2.957400000  |
| Ti | 9.741600000  | 6.494391717 | 0.000000000  |
| Ti | 6.494400000  | 6.494391717 | 10.350900000 |
| Ti | 6.494400000  | 6.494391717 | 7.393500000  |
| Ti | 9.741600000  | 6.494391717 | 8.872200000  |
| Ti | 9.741600000  | 6.494391717 | 5.914800000  |
| Ti | 3.227727321  | 9.737544901 | 1.479069084  |
| Ti | 3.232073633  | 9.737944954 | 4.436179377  |
| Ti | -0.011002683 | 9.836615048 | 2.957331270  |
| Ti | -0.013925163 | 9.836368230 | 0.001377320  |
| Ti | 3.226349989  | 9.737555260 | 7.393147715  |
| Ti | 3.226552614  | 9.736608350 | 10.351431149 |

|    |              |              |              |
|----|--------------|--------------|--------------|
| Ti | -0.016274707 | 9.836807216  | 8.876556132  |
| Ti | -0.004929509 | 9.836990454  | 5.915570935  |
| Ti | 9.736410974  | 9.740010582  | 1.480385008  |
| Ti | 9.743932918  | 9.737783504  | 4.435976736  |
| Ti | 6.483520062  | 9.755998752  | 2.972682779  |
| Ti | 6.480314296  | 9.731485535  | 0.012400023  |
| Ti | 9.742978371  | 9.733661534  | 7.396058033  |
| Ti | 9.730210121  | 9.738100331  | 10.354709013 |
| Ti | 6.477456890  | 9.755163642  | 8.877675449  |
| Ti | 6.489232276  | 9.757645754  | 5.925858902  |
| Ti | -0.025781209 | 13.174010245 | 1.503476269  |
| Ti | -0.026122945 | 13.174466377 | 4.461691447  |
| Ti | 3.220176672  | 12.991173032 | 2.964730330  |
| Ti | 3.216308088  | 12.994558120 | 5.920715628  |
| Ti | 6.469247449  | 13.008685331 | 1.509987399  |
| Ti | 6.468461107  | 13.122922825 | 4.486451155  |
| Ti | 9.717032594  | 12.995106406 | 2.967096605  |
| Ti | 9.717397320  | 12.988467320 | 5.924223578  |
| Ti | -0.025278153 | 13.174207414 | 7.419900828  |
| Ti | -0.024844457 | 13.178386891 | 10.377183005 |
| Ti | 3.220742724  | 12.988725925 | 8.879776859  |
| Ti | 3.220777014  | 12.993516197 | 0.007813806  |

|    |              |              |              |
|----|--------------|--------------|--------------|
| Ti | 6.466407318  | 13.124795928 | 7.356542555  |
| Ti | 6.468182107  | 13.008905003 | 10.330159044 |
| Ti | 9.716472647  | 12.988783433 | 8.881022989  |
| Ti | 9.716205467  | 12.997103096 | 0.009867424  |
| Ti | 9.705115890  | 16.320663621 | 1.482453650  |
| Ti | 9.718429410  | 16.308677762 | 4.438148177  |
| Ti | 6.453473330  | 16.314686051 | 2.977279998  |
| Ti | -0.038665709 | 16.632053779 | 5.919858337  |
| Ti | 3.205286831  | 16.311141300 | 1.478364394  |
| Ti | 3.192398434  | 16.307921234 | 4.441493351  |
| Ti | -0.042587028 | 16.629250196 | 2.957151933  |
| Ti | 6.454977433  | 16.581197461 | 5.915982250  |
| Ti | 3.198122469  | 16.308607753 | 7.402748973  |
| Ti | 3.199959215  | 16.318319027 | 10.353120061 |
| Ti | -0.041637027 | 16.640756707 | 8.877255025  |
| Ti | 6.455227857  | 16.268534279 | 0.003867215  |
| Ti | 9.714934253  | 16.303819267 | 7.396560081  |
| Ti | 9.709322572  | 16.313817365 | 10.355935388 |
| Ti | 6.454876251  | 16.319561691 | 8.863026263  |
| Ti | -0.040966415 | 16.639191501 | 0.003768201  |
| Ti | 6.411117243  | 19.962114799 | 7.245222825  |
| Ti | 6.442507926  | 19.557465972 | 10.192934146 |

|    |              |              |              |
|----|--------------|--------------|--------------|
| Ti | 3.233787765  | 19.569924750 | 8.911594224  |
| Ti | 3.229110628  | 19.558376806 | -0.019448927 |
| Ti | 6.416718923  | 19.606128788 | 1.699238878  |
| Ti | 6.603009748  | 20.043308313 | 4.435190659  |
| Ti | 3.110971128  | 19.564386166 | 2.880920335  |
| Ti | 3.096879838  | 19.559001531 | 6.000008136  |
| Ti | -0.091637283 | 20.005660872 | 1.470652323  |
| Ti | -0.066285613 | 19.993138514 | 4.438482718  |
| Ti | 9.714496661  | 19.566792553 | 2.939990141  |
| Ti | 9.714398076  | 19.560737116 | 5.952555351  |
| Ti | -0.084123912 | 20.008571254 | 7.407519732  |
| Ti | -0.057902512 | 20.005462275 | 10.354143203 |
| Ti | 9.670794155  | 19.561906198 | 8.890021884  |
| Ti | 9.643007604  | 19.565388798 | -0.003198606 |
| O  | 0.000000000  | 1.266694833  | 2.957400000  |
| O  | 0.000000000  | 1.266694833  | 0.000000000  |
| O  | 0.000000000  | 1.266694833  | 8.872200000  |
| O  | 0.000000000  | 1.266694833  | 5.914800000  |
| O  | 6.494400000  | 1.266694833  | 2.957400000  |
| O  | 6.494400000  | 1.266694833  | 0.000000000  |
| O  | 6.494400000  | 1.266694833  | 8.872200000  |
| O  | 6.494400000  | 1.266694833  | 5.914800000  |



|   |              |             |              |
|---|--------------|-------------|--------------|
| O | 9.741600000  | 1.980495667 | 8.872200000  |
| O | 9.741600000  | 1.980495667 | 5.914800000  |
| O | 9.741600000  | 1.980495667 | 2.957400000  |
| O | 9.741600000  | 1.980495667 | 0.000000000  |
| O | 3.247200000  | 1.980495667 | 8.872200000  |
| O | 3.247200000  | 1.980495667 | 5.914800000  |
| O | 3.247200000  | 1.980495667 | 2.957400000  |
| O | 3.247200000  | 1.980495667 | 0.000000000  |
| O | 1.266698949  | 3.247194072 | 1.478700000  |
| O | 1.266698949  | 3.247194072 | 4.436100000  |
| O | 5.227599738  | 3.247194072 | 1.478700000  |
| O | 5.227599738  | 3.247194072 | 4.436100000  |
| O | 1.266698949  | 3.247194072 | 7.393500000  |
| O | 1.266698949  | 3.247194072 | 10.350900000 |
| O | 5.227599738  | 3.247194072 | 7.393500000  |
| O | 5.227599738  | 3.247194072 | 10.350900000 |
| O | 7.761098949  | 3.247194072 | 1.478700000  |
| O | 7.761098949  | 3.247194072 | 4.436100000  |
| O | 11.721999738 | 3.247194072 | 1.478700000  |
| O | 11.721999738 | 3.247194072 | 4.436100000  |
| O | 7.761098949  | 3.247194072 | 7.393500000  |
| O | 7.761098949  | 3.247194072 | 10.350900000 |

|   |              |             |              |
|---|--------------|-------------|--------------|
| O | 11.721999738 | 3.247194072 | 7.393500000  |
| O | 11.721999738 | 3.247194072 | 10.350900000 |
| O | 9.741600000  | 4.513896049 | 8.872200000  |
| O | 9.741600000  | 4.513896049 | 5.914800000  |
| O | 9.741600000  | 4.513896049 | 2.957400000  |
| O | 9.741600000  | 4.513896049 | 0.000000000  |
| O | 3.247200000  | 4.513896049 | 8.872200000  |
| O | 3.247200000  | 4.513896049 | 5.914800000  |
| O | 3.247200000  | 4.513896049 | 2.957400000  |
| O | 3.247200000  | 4.513896049 | 0.000000000  |
| O | 0.000000000  | 5.227596870 | 2.957400000  |
| O | 0.000000000  | 5.227596870 | 0.000000000  |
| O | 0.000000000  | 5.227596870 | 8.872200000  |
| O | 0.000000000  | 5.227596870 | 5.914800000  |
| O | 6.494400000  | 5.227596870 | 0.000000000  |
| O | 6.494400000  | 5.227596870 | 2.957400000  |
| O | 6.494400000  | 5.227596870 | 8.872200000  |
| O | 6.494400000  | 5.227596870 | 5.914800000  |
| O | 8.474899752  | 6.494391717 | 7.393500000  |
| O | 11.008298949 | 6.494391717 | 7.393500000  |
| O | 8.474899752  | 6.494391717 | 10.350900000 |
| O | 11.008298949 | 6.494391717 | 10.350900000 |

|   |              |             |              |
|---|--------------|-------------|--------------|
| O | 8.474899752  | 6.494391717 | 1.478700000  |
| O | 11.008298949 | 6.494391717 | 1.478700000  |
| O | 8.474899752  | 6.494391717 | 4.436100000  |
| O | 11.008298949 | 6.494391717 | 4.436100000  |
| O | 1.980499752  | 6.494391717 | 1.478700000  |
| O | 4.513898949  | 6.494391717 | 1.478700000  |
| O | 1.980499752  | 6.494391717 | 4.436100000  |
| O | 4.513898949  | 6.494391717 | 4.436100000  |
| O | 1.980499752  | 6.494391717 | 7.393500000  |
| O | 4.513898949  | 6.494391717 | 7.393500000  |
| O | 1.980499752  | 6.494391717 | 10.350900000 |
| O | 4.513898949  | 6.494391717 | 10.350900000 |
| O | 0.000000000  | 7.761086550 | 8.872200000  |
| O | 0.000000000  | 7.761086550 | 5.914800000  |
| O | 6.494400000  | 7.761086550 | 2.957400000  |
| O | 6.494400000  | 7.761086550 | 0.000000000  |
| O | 0.000000000  | 7.761086550 | 2.957400000  |
| O | 0.000000000  | 7.761086550 | 0.000000000  |
| O | 6.494400000  | 7.761086550 | 8.872200000  |
| O | 6.494400000  | 7.761086550 | 5.914800000  |
| O | 3.247200000  | 8.474887384 | 2.957400000  |
| O | 3.247200000  | 8.474887384 | 0.000000000  |

|   |              |             |              |
|---|--------------|-------------|--------------|
| O | 3.247200000  | 8.474887384 | 8.872200000  |
| O | 3.247200000  | 8.474887384 | 5.914800000  |
| O | 9.741600000  | 8.474887384 | 2.957400000  |
| O | 9.741600000  | 8.474887384 | 0.000000000  |
| O | 9.741600000  | 8.474887384 | 8.872200000  |
| O | 9.741600000  | 8.474887384 | 5.914800000  |
| O | 1.270044215  | 9.785651216 | 1.479071213  |
| O | 1.271930318  | 9.787002107 | 4.435283876  |
| O | 5.211871600  | 9.773468188 | 1.483340042  |
| O | 5.213225163  | 9.775333076 | 4.442146700  |
| O | 1.270957327  | 9.787552894 | 7.395448808  |
| O | 1.269451666  | 9.786329876 | 10.351233240 |
| O | 5.212040065  | 9.775563106 | 7.394658000  |
| O | 5.211117600  | 9.773480332 | 10.356067642 |
| O | 7.759347539  | 9.781176342 | 1.482426442  |
| O | 7.761401198  | 9.781888579 | 4.440551715  |
| O | 11.701781112 | 9.780417314 | 1.479592070  |
| O | 11.703411207 | 9.781449593 | 4.437306028  |
| O | 7.760517051  | 9.781742488 | 7.397674902  |
| O | 7.758481186  | 9.780532329 | 10.355012560 |
| O | 11.702659285 | 9.780915594 | 7.392397600  |
| O | 11.700420146 | 9.780470536 | 10.352109813 |

|   |              |              |             |
|---|--------------|--------------|-------------|
| O | 9.727076573  | 11.071011356 | 2.958816949 |
| O | 9.725162674  | 11.071847537 | 0.002146954 |
| O | 3.244710177  | 11.070860622 | 2.958312535 |
| O | 3.244397796  | 11.070983852 | 0.002046284 |
| O | 3.244610163  | 11.069735474 | 8.874617615 |
| O | 3.244671340  | 11.072065423 | 5.915869396 |
| O | 9.726661062  | 11.069868349 | 8.874403736 |
| O | 9.725222812  | 11.070264115 | 5.917007403 |
| O | 6.467997147  | 11.794924588 | 8.869283530 |
| O | -0.023195139 | 11.798589712 | 2.956279382 |
| O | 6.468643469  | 11.791583078 | 0.005205142 |
| O | 6.471143164  | 11.808273483 | 5.918891740 |
| O | -0.023577270 | 11.798789024 | 0.000216955 |
| O | -0.021581930 | 11.797795680 | 5.913730722 |
| O | 6.469170295  | 11.795820063 | 2.970623955 |
| O | -0.023810938 | 11.798398616 | 8.872222595 |
| O | 8.437519155  | 13.092613133 | 1.483474427 |
| O | 8.441321626  | 13.097401618 | 4.437169159 |
| O | 10.973973837 | 13.114671028 | 1.481836382 |
| O | 10.974431303 | 13.110710865 | 4.440823796 |
| O | 1.964703293  | 13.100285568 | 1.481868558 |
| O | 1.963933447  | 13.097810243 | 4.438415053 |

|   |              |              |              |
|---|--------------|--------------|--------------|
| O | 4.501117061  | 13.107866563 | 1.482932749  |
| O | 4.496738017  | 13.113864494 | 4.437552438  |
| O | 1.964026447  | 13.096148597 | 7.398577383  |
| O | 1.964704982  | 13.098481760 | 10.356788657 |
| O | 4.496627352  | 13.111207716 | 7.400255056  |
| O | 4.500970287  | 13.106927154 | 10.356643981 |
| O | 8.441417613  | 13.096417561 | 7.402291877  |
| O | 8.437181835  | 13.091375113 | 10.356550172 |
| O | 10.974511573 | 13.109791816 | 7.398094025  |
| O | 10.973839533 | 13.112851146 | 10.357447210 |
| O | -0.023305804 | 14.409567777 | 2.964959824  |
| O | -0.021916392 | 14.409406328 | 5.921751428  |
| O | -0.022870809 | 14.409270953 | 8.878122371  |
| O | -0.022103561 | 14.410412174 | 0.007367475  |
| O | 6.469560868  | 14.411708415 | 2.950957600  |
| O | 6.472687792  | 14.421632932 | 5.919402542  |
| O | 6.469368634  | 14.410263583 | 8.887931002  |
| O | 6.470594907  | 14.408550858 | 0.007220788  |
| O | 9.691405042  | 15.110280465 | 8.880488528  |
| O | 3.213780467  | 15.109803616 | 8.879535298  |
| O | 9.700092341  | 15.108258056 | 5.917960396  |
| O | 9.688341244  | 15.111182726 | 2.958176613  |

|   |              |              |              |
|---|--------------|--------------|--------------|
| O | 3.215492910  | 15.113491600 | 2.958204058  |
| O | 9.683151699  | 15.113023682 | 0.006194097  |
| O | 3.218674907  | 15.112076415 | 0.002909608  |
| O | 3.200188597  | 15.110890545 | 5.920295322  |
| O | 1.248916892  | 16.476631593 | 10.354193006 |
| O | 5.171370574  | 16.431312073 | 4.453602011  |
| O | 5.173714143  | 16.440433270 | 7.383838647  |
| O | 7.726260909  | 16.492279361 | 1.487677483  |
| O | 7.737297882  | 16.460161931 | 4.448329086  |
| O | 5.179902916  | 16.462303283 | 10.359310609 |
| O | 11.659501270 | 16.459682225 | 1.480345734  |
| O | 11.662360104 | 16.462727625 | 4.441142958  |
| O | 1.249988208  | 16.478162151 | 4.438888828  |
| O | 1.252874450  | 16.480838216 | 1.482462286  |
| O | 5.180597557  | 16.480276714 | 1.484156876  |
| O | 7.735843397  | 16.454186504 | 7.387325777  |
| O | 7.728217542  | 16.478246805 | 10.355798401 |
| O | 1.251654412  | 16.484178655 | 7.400161011  |
| O | 11.662143321 | 16.462133976 | 7.398767011  |
| O | 11.660094728 | 16.459565781 | 10.355455579 |
| O | 3.238070302  | 17.743684687 | 8.880641484  |
| O | 3.227397535  | 17.738173250 | 0.000634067  |

|   |              |              |              |
|---|--------------|--------------|--------------|
| O | 9.691459725  | 17.744503723 | 2.963236725  |
| O | 9.685112488  | 17.741066129 | 5.926370059  |
| O | 3.235166656  | 17.755760201 | 2.968330432  |
| O | 3.237137187  | 17.753017698 | 5.916554803  |
| O | 9.677600156  | 17.738739753 | 8.879263572  |
| O | 9.682797624  | 17.742775282 | -0.000003904 |
| O | 6.451090795  | 18.668336054 | -0.004273443 |
| O | 6.431095446  | 18.576842973 | 5.903670831  |
| O | -0.064374961 | 18.515371691 | 0.003529361  |
| O | 6.410329472  | 18.477664241 | 3.110450300  |
| O | -0.047056604 | 18.509741666 | 5.924414981  |
| O | 6.427802915  | 18.454653007 | 8.782092754  |
| O | -0.065082850 | 18.516471121 | 8.880798226  |
| O | -0.054184728 | 18.508126811 | 2.957210253  |
| O | 1.997933449  | 19.925711807 | 4.438191946  |
| O | 4.464195228  | 19.960012738 | 1.476666255  |
| O | 4.411362504  | 20.253466255 | 4.449897572  |
| O | 1.955399675  | 19.928597900 | 7.443402813  |
| O | 1.987205999  | 19.948244407 | 10.355760901 |
| O | 4.436192674  | 19.992463068 | 7.392248310  |
| O | 4.514418371  | 19.983315796 | 10.368472989 |
| O | 8.398444948  | 19.921192642 | 1.481432046  |



|   |              |              |              |
|---|--------------|--------------|--------------|
| O | 8.504332113  | 20.018505058 | 4.447010085  |
| O | 10.885960170 | 19.975479053 | 1.462632919  |
| O | 10.921528959 | 19.931016074 | 4.445438523  |
| O | 8.427004851  | 19.986496214 | 7.408919884  |
| O | 8.378094226  | 20.013164714 | 10.357068072 |
| O | 10.903537393 | 19.959810925 | 7.420654137  |
| O | 10.879918169 | 19.961207894 | 10.361105751 |
| O | 1.960362436  | 19.939182861 | 1.447941739  |
| O | 6.461761484  | 21.053716293 | 2.891210667  |
| O | 6.453830652  | 21.202106842 | 5.905202172  |
| O | -0.037515031 | 21.107204385 | 2.958574324  |
| O | -0.033159757 | 21.109678281 | 5.919739804  |
| O | -0.057487909 | 21.124918139 | 8.880790182  |
| O | -0.055792611 | 21.122852868 | 0.001066675  |
| O | 6.427723554  | 21.161102174 | 8.943395265  |
| H | 0.000000000  | 0.932897449  | 9.814799089  |
| H | 0.816399334  | 0.932897449  | 8.400899272  |
| H | 6.457698847  | 0.932897449  | 6.856699960  |
| H | 0.834099172  | 0.932897449  | -0.439201108 |
| H | 0.000000000  | 0.932897449  | 3.899999089  |
| H | 0.816399334  | 0.932897449  | 2.486099272  |
| H | 6.457698847  | 0.932897449  | 0.941899960  |

|   |              |              |              |
|---|--------------|--------------|--------------|
| H | 0.834099172  | 0.932897449  | 5.475598892  |
| H | 6.494400000  | 0.932897449  | 9.814799089  |
| H | 7.310799334  | 0.932897449  | 8.400899272  |
| H | -0.036701153 | 0.932897449  | 6.856699960  |
| H | 7.328499172  | 0.932897449  | -0.439201108 |
| H | 6.494400000  | 0.932897449  | 3.899999089  |
| H | 7.310799334  | 0.932897449  | 2.486099272  |
| H | -0.036701153 | 0.932897449  | 0.941899960  |
| H | 7.328499172  | 0.932897449  | 5.475598892  |
| H | 4.426502769  | 21.233332369 | 4.457808854  |
| H | 7.242643594  | 21.693887820 | 8.971360676  |

TS8-4:

|    |             |             |              |
|----|-------------|-------------|--------------|
| Ti | 3.247200000 | 3.247190143 | 1.478700000  |
| Ti | 3.247200000 | 3.247190143 | 4.436100000  |
| Ti | 0.000000000 | 3.247190143 | 2.957400000  |
| Ti | 0.000000000 | 3.247190143 | 0.000000000  |
| Ti | 3.247200000 | 3.247190143 | 7.393500000  |
| Ti | 3.247200000 | 3.247190143 | 10.350900000 |
| Ti | 0.000000000 | 3.247190143 | 8.872200000  |
| Ti | 0.000000000 | 3.247190143 | 5.914800000  |
| Ti | 9.741600000 | 3.247190143 | 1.478700000  |
| Ti | 9.741600000 | 3.247190143 | 4.436100000  |

|    |             |             |              |
|----|-------------|-------------|--------------|
| Ti | 6.494400000 | 3.247190143 | 2.957400000  |
| Ti | 6.494400000 | 3.247190143 | 0.000000000  |
| Ti | 9.741600000 | 3.247190143 | 7.393500000  |
| Ti | 9.741600000 | 3.247190143 | 10.350900000 |
| Ti | 6.494400000 | 3.247190143 | 8.872200000  |
| Ti | 6.494400000 | 3.247190143 | 5.914800000  |
| Ti | 0.000000000 | 6.494389931 | 4.436100000  |
| Ti | 0.000000000 | 6.494389931 | 1.478700000  |
| Ti | 3.247200000 | 6.494389931 | 2.957400000  |
| Ti | 3.247200000 | 6.494389931 | 0.000000000  |
| Ti | 0.000000000 | 6.494389931 | 10.350900000 |
| Ti | 0.000000000 | 6.494389931 | 7.393500000  |
| Ti | 3.247200000 | 6.494389931 | 8.872200000  |
| Ti | 3.247200000 | 6.494389931 | 5.914800000  |
| Ti | 6.494400000 | 6.494389931 | 4.436100000  |
| Ti | 6.494400000 | 6.494389931 | 1.478700000  |
| Ti | 9.741600000 | 6.494389931 | 2.957400000  |
| Ti | 9.741600000 | 6.494389931 | 0.000000000  |
| Ti | 6.494400000 | 6.494389931 | 10.350900000 |
| Ti | 6.494400000 | 6.494389931 | 7.393500000  |
| Ti | 9.741600000 | 6.494389931 | 8.872200000  |
| Ti | 9.741600000 | 6.494389931 | 5.914800000  |

|    |              |              |              |
|----|--------------|--------------|--------------|
| Ti | 3.230601223  | 9.739012951  | 1.478678588  |
| Ti | 3.232781003  | 9.738240350  | 4.435989512  |
| Ti | -0.007725478 | 9.838144177  | 2.957002762  |
| Ti | -0.011771620 | 9.837356216  | 0.000042941  |
| Ti | 3.227010599  | 9.738730771  | 7.393297359  |
| Ti | 3.228809028  | 9.738200702  | 10.351143098 |
| Ti | -0.014430297 | 9.837096182  | 8.875343716  |
| Ti | -0.005595055 | 9.838681033  | 5.915185645  |
| Ti | 9.740003417  | 9.741032859  | 1.480329764  |
| Ti | 9.745425202  | 9.737602052  | 4.436163643  |
| Ti | 6.487863386  | 9.755116851  | 2.971351830  |
| Ti | 6.481423150  | 9.731712707  | 0.011324358  |
| Ti | 9.741903808  | 9.736175436  | 7.395694273  |
| Ti | 9.732480953  | 9.737870658  | 10.353472820 |
| Ti | 6.480161418  | 9.755987679  | 8.876551637  |
| Ti | 6.487284346  | 9.754799309  | 5.924613718  |
| Ti | -0.023759113 | 13.178155432 | 1.507477395  |
| Ti | -0.024172806 | 13.179310941 | 4.464791867  |
| Ti | 3.221350729  | 12.997142387 | 2.965548583  |
| Ti | 3.218085605  | 12.997758897 | 5.921795079  |
| Ti | 6.470386177  | 13.006501473 | 1.505847749  |
| Ti | 6.469584768  | 13.113327637 | 4.484821509  |

|    |              |              |              |
|----|--------------|--------------|--------------|
| Ti | 9.717900376  | 12.996708045 | 2.967497273  |
| Ti | 9.719757514  | 12.992042075 | 5.925001492  |
| Ti | -0.023381658 | 13.177718946 | 7.422877274  |
| Ti | -0.023844449 | 13.179096627 | 10.379977512 |
| Ti | 3.222096546  | 12.994686708 | 8.881769318  |
| Ti | 3.222560117  | 12.998739383 | 0.009844593  |
| Ti | 6.468464614  | 13.120693247 | 7.355479074  |
| Ti | 6.469978198  | 13.008859282 | 10.328778175 |
| Ti | 9.718150150  | 12.993420827 | 8.882194119  |
| Ti | 9.717571629  | 12.997566014 | 0.010015294  |
| Ti | 9.707538950  | 16.320201060 | 1.481143759  |
| Ti | 9.717928561  | 16.316088378 | 4.438091040  |
| Ti | 6.453453717  | 16.297724181 | 2.971327225  |
| Ti | -0.037372285 | 16.637739168 | 5.919726082  |
| Ti | 3.205695978  | 16.338413094 | 1.484866889  |
| Ti | 3.197577329  | 16.324624498 | 4.438624082  |
| Ti | -0.043625223 | 16.640935302 | 2.959029291  |
| Ti | 6.460568462  | 16.549323277 | 5.914850867  |
| Ti | 3.197074402  | 16.311372401 | 7.399641337  |
| Ti | 3.199817637  | 16.318355104 | 10.357509079 |
| Ti | -0.041382966 | 16.642178679 | 8.877548162  |
| Ti | 6.457636890  | 16.268562497 | -0.000136395 |

|    |              |              |              |
|----|--------------|--------------|--------------|
| Ti | 9.715251700  | 16.307054335 | 7.396087252  |
| Ti | 9.708526099  | 16.322974281 | 10.354921709 |
| Ti | 6.450994937  | 16.310858048 | 8.861372485  |
| Ti | -0.038350601 | 16.639609056 | 0.003964572  |
| Ti | 6.417057801  | 19.914036703 | 7.243654102  |
| Ti | 6.426481695  | 19.572839419 | 10.175647907 |
| Ti | 3.213911654  | 19.569005701 | 8.907577483  |
| Ti | 3.210877081  | 19.573820976 | 0.006429742  |
| Ti | 6.427354282  | 19.594481902 | 1.661802571  |
| Ti | 6.647243496  | 19.953207559 | 4.376722387  |
| Ti | 3.228970869  | 19.619542334 | 2.960802666  |
| Ti | 3.124912526  | 19.557248086 | 5.961349358  |
| Ti | -0.037434891 | 20.005798033 | 1.481339420  |
| Ti | -0.043921367 | 19.999071078 | 4.438783426  |
| Ti | 9.744173081  | 19.574181738 | 2.918837160  |
| Ti | 9.740933934  | 19.567187605 | 5.947061212  |
| Ti | -0.057561556 | 20.012950757 | 7.407110783  |
| Ti | -0.068805700 | 20.006343819 | 10.357815702 |
| Ti | 9.660163082  | 19.577808999 | 8.879458997  |
| Ti | 9.650598649  | 19.568032716 | -0.010640843 |
| O  | 0.000000000  | 1.266689833  | 2.957400000  |
| O  | 0.000000000  | 1.266689833  | 0.000000000  |

|   |             |             |              |
|---|-------------|-------------|--------------|
| O | 0.000000000 | 1.266689833 | 8.872200000  |
| O | 0.000000000 | 1.266689833 | 5.914800000  |
| O | 6.494400000 | 1.266689833 | 2.957400000  |
| O | 6.494400000 | 1.266689833 | 0.000000000  |
| O | 6.494400000 | 1.266689833 | 8.872200000  |
| O | 6.494400000 | 1.266689833 | 5.914800000  |
| O | 9.741600000 | 1.980499953 | 8.872200000  |
| O | 9.741600000 | 1.980499953 | 5.914800000  |
| O | 9.741600000 | 1.980499953 | 2.957400000  |
| O | 9.741600000 | 1.980499953 | 0.000000000  |
| O | 3.247200000 | 1.980499953 | 8.872200000  |
| O | 3.247200000 | 1.980499953 | 5.914800000  |
| O | 3.247200000 | 1.980499953 | 2.957400000  |
| O | 3.247200000 | 1.980499953 | 0.000000000  |
| O | 1.266699988 | 3.247190143 | 1.478700000  |
| O | 1.266699988 | 3.247190143 | 4.436100000  |
| O | 5.227599998 | 3.247190143 | 1.478700000  |
| O | 5.227599998 | 3.247190143 | 4.436100000  |
| O | 1.266699988 | 3.247190143 | 7.393500000  |
| O | 1.266699988 | 3.247190143 | 10.350900000 |
| O | 5.227599998 | 3.247190143 | 7.393500000  |
| O | 5.227599998 | 3.247190143 | 10.350900000 |

|   |              |             |              |
|---|--------------|-------------|--------------|
| O | 7.761099988  | 3.247190143 | 1.478700000  |
| O | 7.761099988  | 3.247190143 | 4.436100000  |
| O | 11.721999998 | 3.247190143 | 1.478700000  |
| O | 11.721999998 | 3.247190143 | 4.436100000  |
| O | 7.761099988  | 3.247190143 | 7.393500000  |
| O | 7.761099988  | 3.247190143 | 10.350900000 |
| O | 11.721999998 | 3.247190143 | 7.393500000  |
| O | 11.721999998 | 3.247190143 | 10.350900000 |
| O | 9.741600000  | 4.513899978 | 8.872200000  |
| O | 9.741600000  | 4.513899978 | 5.914800000  |
| O | 9.741600000  | 4.513899978 | 2.957400000  |
| O | 9.741600000  | 4.513899978 | 0.000000000  |
| O | 3.247200000  | 4.513899978 | 8.872200000  |
| O | 3.247200000  | 4.513899978 | 5.914800000  |
| O | 3.247200000  | 4.513899978 | 2.957400000  |
| O | 3.247200000  | 4.513899978 | 0.000000000  |
| O | 0.000000000  | 5.227600085 | 2.957400000  |
| O | 0.000000000  | 5.227600085 | 0.000000000  |
| O | 0.000000000  | 5.227600085 | 8.872200000  |
| O | 0.000000000  | 5.227600085 | 5.914800000  |
| O | 6.494400000  | 5.227600085 | 0.000000000  |
| O | 6.494400000  | 5.227600085 | 2.957400000  |



|   |              |             |              |
|---|--------------|-------------|--------------|
| O | 6.494400000  | 5.227600085 | 8.872200000  |
| O | 6.494400000  | 5.227600085 | 5.914800000  |
| O | 8.474900012  | 6.494389931 | 7.393500000  |
| O | 11.008299988 | 6.494389931 | 7.393500000  |
| O | 8.474900012  | 6.494389931 | 10.350900000 |
| O | 11.008299988 | 6.494389931 | 10.350900000 |
| O | 8.474900012  | 6.494389931 | 1.478700000  |
| O | 11.008299988 | 6.494389931 | 1.478700000  |
| O | 8.474900012  | 6.494389931 | 4.436100000  |
| O | 11.008299988 | 6.494389931 | 4.436100000  |
| O | 1.980500012  | 6.494389931 | 1.478700000  |
| O | 4.513899988  | 6.494389931 | 1.478700000  |
| O | 1.980500012  | 6.494389931 | 4.436100000  |
| O | 4.513899988  | 6.494389931 | 4.436100000  |
| O | 1.980500012  | 6.494389931 | 7.393500000  |
| O | 4.513899988  | 6.494389931 | 7.393500000  |
| O | 1.980500012  | 6.494389931 | 10.350900000 |
| O | 4.513899988  | 6.494389931 | 10.350900000 |
| O | 0.000000000  | 7.761090122 | 8.872200000  |
| O | 0.000000000  | 7.761090122 | 5.914800000  |
| O | 6.494400000  | 7.761090122 | 2.957400000  |
| O | 6.494400000  | 7.761090122 | 0.000000000  |

|   |             |             |              |
|---|-------------|-------------|--------------|
| O | 0.000000000 | 7.761090122 | 2.957400000  |
| O | 0.000000000 | 7.761090122 | 0.000000000  |
| O | 6.494400000 | 7.761090122 | 8.872200000  |
| O | 6.494400000 | 7.761090122 | 5.914800000  |
| O | 3.247200000 | 8.474889884 | 2.957400000  |
| O | 3.247200000 | 8.474889884 | 0.000000000  |
| O | 3.247200000 | 8.474889884 | 8.872200000  |
| O | 3.247200000 | 8.474889884 | 5.914800000  |
| O | 9.741600000 | 8.474889884 | 2.957400000  |
| O | 9.741600000 | 8.474889884 | 0.000000000  |
| O | 9.741600000 | 8.474889884 | 8.872200000  |
| O | 9.741600000 | 8.474889884 | 5.914800000  |
| O | 1.271465709 | 9.786549191 | 1.478722476  |
| O | 1.272644183 | 9.787559680 | 4.435906349  |
| O | 5.212646772 | 9.773640711 | 1.482575968  |
| O | 5.213744585 | 9.774760500 | 4.441006090  |
| O | 1.271450512 | 9.787502887 | 7.394875546  |
| O | 1.270394652 | 9.786400600 | 10.350818257 |
| O | 5.212166836 | 9.774604766 | 7.394628189  |
| O | 5.211726775 | 9.773805732 | 10.355823243 |
| O | 7.761155710 | 9.780972387 | 1.481078696  |
| O | 7.762505896 | 9.780822725 | 4.440405856  |

|   |              |              |              |
|---|--------------|--------------|--------------|
| O | 11.703297425 | 9.780788434  | 1.479242505  |
| O | 11.704316916 | 9.781389228  | 4.436843490  |
| O | 7.761092974  | 9.780364093  | 7.397309841  |
| O | 7.759528214  | 9.780634486  | 10.354557121 |
| O | 11.703294827 | 9.781452093  | 7.392470588  |
| O | 11.701713830 | 9.780944884  | 10.351580084 |
| O | 9.728349735  | 11.072330100 | 2.958675586  |
| O | 9.725731323  | 11.073027335 | 0.001715055  |
| O | 3.245303246  | 11.074493599 | 2.958689426  |
| O | 3.244703163  | 11.074223563 | 0.001915331  |
| O | 3.245565230  | 11.072914463 | 8.874564855  |
| O | 3.245881897  | 11.074409302 | 5.915674089  |
| O | 9.727675097  | 11.071907902 | 8.874043525  |
| O | 9.725212551  | 11.072183295 | 5.917153854  |
| O | 6.466189755  | 11.792392113 | 8.867074826  |
| O | -0.021367485 | 11.799673783 | 2.955944013  |
| O | 6.470233688  | 11.789376717 | 0.003042218  |
| O | 6.474553243  | 11.802819911 | 5.919236455  |
| O | -0.021267861 | 11.799669497 | -0.000899641 |
| O | -0.020100428 | 11.799852735 | 5.913120907  |
| O | 6.468623207  | 11.791577363 | 2.967992815  |
| O | -0.021914314 | 11.799788798 | 8.871652053  |

|   |              |              |              |
|---|--------------|--------------|--------------|
| O | 8.438489548  | 13.094117259 | 1.483497021  |
| O | 8.442819364  | 13.097617718 | 4.436216048  |
| O | 10.974438057 | 13.115930836 | 1.480847191  |
| O | 10.975626922 | 13.111697066 | 4.440956169  |
| O | 1.966057246  | 13.104775443 | 1.483013545  |
| O | 1.965211285  | 13.103301321 | 4.438169352  |
| O | 4.501778840  | 13.109675729 | 1.483347140  |
| O | 4.497826218  | 13.116871674 | 4.437132251  |
| O | 1.965794352  | 13.100120547 | 7.398686215  |
| O | 1.966775266  | 13.105562332 | 10.357346541 |
| O | 4.497991046  | 13.116798450 | 7.398884124  |
| O | 4.501343066  | 13.110826952 | 10.357807658 |
| O | 8.442681553  | 13.100770632 | 7.403019397  |
| O | 8.437961034  | 13.092175933 | 10.355063664 |
| O | 10.975625493 | 13.112294645 | 7.397716069  |
| O | 10.974570672 | 13.114839264 | 10.357964046 |
| O | -0.023602858 | 14.411512318 | 2.965322047  |
| O | -0.021068743 | 14.412011669 | 5.922237388  |
| O | -0.023738201 | 14.410236079 | 8.879496261  |
| O | -0.021364368 | 14.411911299 | 0.008647201  |
| O | 6.466206641  | 14.403514126 | 2.947333838  |
| O | 6.480842291  | 14.421151083 | 5.915389706  |

|   |              |              |              |
|---|--------------|--------------|--------------|
| O | 6.464537710  | 14.407752182 | 8.888744405  |
| O | 6.473769629  | 14.406953506 | 0.003554558  |
| O | 9.697714871  | 15.115670815 | 8.881858395  |
| O | 3.214646171  | 15.113963091 | 8.880127252  |
| O | 9.702144052  | 15.112339306 | 5.915775232  |
| O | 9.695075417  | 15.114846064 | 2.957818295  |
| O | 3.217289002  | 15.130397748 | 2.955945432  |
| O | 9.682614482  | 15.116684877 | 0.000219202  |
| O | 3.219749470  | 15.124620204 | 0.015953753  |
| O | 3.201001046  | 15.117443905 | 5.915702598  |
| O | 1.247904156  | 16.471235527 | 10.356584714 |
| O | 5.179297378  | 16.426305344 | 4.453095350  |
| O | 5.174034966  | 16.438438723 | 7.382712351  |
| O | 7.728898935  | 16.488159892 | 1.484464091  |
| O | 7.741580549  | 16.451077882 | 4.436065103  |
| O | 5.179496886  | 16.467023189 | 10.358256000 |
| O | 11.661482062 | 16.460439467 | 1.478092668  |
| O | 11.663849660 | 16.466731008 | 4.443133762  |
| O | 1.251251239  | 16.489770103 | 4.435262819  |
| O | 1.254500647  | 16.490657719 | 1.488797628  |
| O | 5.185226766  | 16.480405660 | 1.474426320  |
| O | 7.737249954  | 16.439818189 | 7.394714072  |

|   |              |              |              |
|---|--------------|--------------|--------------|
| O | 7.727167528  | 16.479954172 | 10.347280142 |
| O | 1.249226805  | 16.480651763 | 7.400146342  |
| O | 11.662831858 | 16.465181161 | 7.399688774  |
| O | 11.660748064 | 16.467926522 | 10.356895596 |
| O | 3.223575581  | 17.742741349 | 8.886021941  |
| O | 3.223380099  | 17.753167718 | 0.002413948  |
| O | 9.693438699  | 17.751766820 | 2.957097754  |
| O | 9.684921683  | 17.745927125 | 5.927589099  |
| O | 3.272690390  | 17.791152346 | 2.979799229  |
| O | 3.236740509  | 17.742755994 | 5.918739493  |
| O | 9.668152622  | 17.753157002 | 8.871714750  |
| O | 9.683055452  | 17.745565649 | -0.002952077 |
| O | 6.465360940  | 18.660742200 | -0.033195869 |
| O | 6.489376062  | 18.543747201 | 5.905934661  |
| O | -0.045996458 | 18.515964983 | 0.007353753  |
| O | 6.407837571  | 18.453171026 | 3.083828140  |
| O | -0.048481735 | 18.511187927 | 5.933618054  |
| O | 6.429903854  | 18.467717578 | 8.756915225  |
| O | -0.052686989 | 18.516686506 | 8.883170534  |
| O | -0.068229907 | 18.512238779 | 2.952265835  |
| O | 1.971761017  | 19.888486564 | 4.430993517  |
| O | 4.498622042  | 19.981983836 | 1.450443463  |

|   |              |              |              |
|---|--------------|--------------|--------------|
| O | 4.403392057  | 20.244243259 | 4.571145412  |
| O | 1.971657626  | 19.956284391 | 7.436952487  |
| O | 1.991455155  | 19.957442400 | 10.369156267 |
| O | 4.446892458  | 19.932965973 | 7.417597723  |
| O | 4.503585582  | 19.978919148 | 10.366964124 |
| O | 8.410668318  | 19.919839965 | 1.466694139  |
| O | 8.515671465  | 20.044058412 | 4.450438303  |
| O | 10.906633403 | 19.971286717 | 1.450757657  |
| O | 10.926923987 | 19.924291263 | 4.440331330  |
| O | 8.413871096  | 20.037165007 | 7.376476023  |
| O | 8.374045487  | 20.023402844 | 10.351976494 |
| O | 10.906706660 | 19.964793008 | 7.423273092  |
| O | 10.881341742 | 19.962963839 | 10.344796636 |
| O | 2.008493344  | 19.953444018 | 1.516261937  |
| O | 6.488734935  | 21.011632912 | 2.876781039  |
| O | 6.189864595  | 21.177357165 | 5.819045185  |
| O | -0.042901357 | 21.114493556 | 2.961775769  |
| O | -0.040587272 | 21.113348763 | 5.920398476  |
| O | -0.052222250 | 21.123632256 | 8.885522022  |
| O | -0.034603722 | 21.118468007 | 0.007356473  |
| O | 6.434066894  | 21.165879587 | 8.914925676  |
| H | 0.000000000  | 0.932899949  | 9.814800036  |

|   |              |              |              |
|---|--------------|--------------|--------------|
| H | 0.816399984  | 0.932899949  | 8.400899982  |
| H | 6.457700016  | 0.932899949  | 6.856699960  |
| H | 0.834099951  | 0.932899949  | -0.439200043 |
| H | 0.000000000  | 0.932899949  | 3.900000036  |
| H | 0.816399984  | 0.932899949  | 2.486099982  |
| H | 6.457700016  | 0.932899949  | 0.941899960  |
| H | 0.834099951  | 0.932899949  | 5.475599957  |
| H | 6.494400000  | 0.932899949  | 9.814800036  |
| H | 7.310799984  | 0.932899949  | 8.400899982  |
| H | -0.036699984 | 0.932899949  | 6.856699960  |
| H | 7.328499951  | 0.932899949  | -0.439200043 |
| H | 6.494400000  | 0.932899949  | 3.900000036  |
| H | 7.310799984  | 0.932899949  | 2.486099982  |
| H | -0.036699984 | 0.932899949  | 0.941899960  |
| H | 7.328499951  | 0.932899949  | 5.475599957  |
| H | 5.085463170  | 20.975744988 | 5.237413918  |
| H | 7.255558617  | 21.688911095 | 8.957015393  |

TS8-5:

|    |             |             |             |
|----|-------------|-------------|-------------|
| Ti | 3.247200000 | 3.247190143 | 1.478700000 |
| Ti | 3.247200000 | 3.247190143 | 4.436100000 |
| Ti | 0.000000000 | 3.247190143 | 2.957400000 |
| Ti | 0.000000000 | 3.247190143 | 0.000000000 |



|    |             |             |              |
|----|-------------|-------------|--------------|
| Ti | 3.247200000 | 3.247190143 | 7.393500000  |
| Ti | 3.247200000 | 3.247190143 | 10.350900000 |
| Ti | 0.000000000 | 3.247190143 | 8.872200000  |
| Ti | 0.000000000 | 3.247190143 | 5.914800000  |
| Ti | 9.741600000 | 3.247190143 | 1.478700000  |
| Ti | 9.741600000 | 3.247190143 | 4.436100000  |
| Ti | 6.494400000 | 3.247190143 | 2.957400000  |
| Ti | 6.494400000 | 3.247190143 | 0.000000000  |
| Ti | 9.741600000 | 3.247190143 | 7.393500000  |
| Ti | 9.741600000 | 3.247190143 | 10.350900000 |
| Ti | 6.494400000 | 3.247190143 | 8.872200000  |
| Ti | 6.494400000 | 3.247190143 | 5.914800000  |
| Ti | 0.000000000 | 6.494389931 | 4.436100000  |
| Ti | 0.000000000 | 6.494389931 | 1.478700000  |
| Ti | 3.247200000 | 6.494389931 | 2.957400000  |
| Ti | 3.247200000 | 6.494389931 | 0.000000000  |
| Ti | 0.000000000 | 6.494389931 | 10.350900000 |
| Ti | 0.000000000 | 6.494389931 | 7.393500000  |
| Ti | 3.247200000 | 6.494389931 | 8.872200000  |
| Ti | 3.247200000 | 6.494389931 | 5.914800000  |
| Ti | 6.494400000 | 6.494389931 | 4.436100000  |
| Ti | 6.494400000 | 6.494389931 | 1.478700000  |

|    |              |             |              |
|----|--------------|-------------|--------------|
| Ti | 9.741600000  | 6.494389931 | 2.957400000  |
| Ti | 9.741600000  | 6.494389931 | 0.000000000  |
| Ti | 6.494400000  | 6.494389931 | 10.350900000 |
| Ti | 6.494400000  | 6.494389931 | 7.393500000  |
| Ti | 9.741600000  | 6.494389931 | 8.872200000  |
| Ti | 9.741600000  | 6.494389931 | 5.914800000  |
| Ti | 3.231637469  | 9.737943525 | 1.478380601  |
| Ti | 3.231698647  | 9.738045324 | 4.436404494  |
| Ti | -0.008415963 | 9.836822218 | 2.957237343  |
| Ti | -0.009916689 | 9.837695904 | 0.000058083  |
| Ti | 3.227051514  | 9.739451223 | 7.393744636  |
| Ti | 3.230026209  | 9.738992234 | 10.350943888 |
| Ti | -0.013206103 | 9.837156190 | 8.874142065  |
| Ti | -0.008450254 | 9.837704119 | 5.915143295  |
| Ti | 9.741635719  | 9.738753631 | 1.481519703  |
| Ti | 9.742353480  | 9.737549188 | 4.439643912  |
| Ti | 6.488282275  | 9.754404614 | 2.971257312  |
| Ti | 6.483067921  | 9.733483297 | 0.012463667  |
| Ti | 9.741368150  | 9.738406443 | 7.397334565  |
| Ti | 9.735999359  | 9.739197975 | 10.354047383 |
| Ti | 6.482468099  | 9.745076604 | 8.878749931  |
| Ti | 6.483640208  | 9.751410650 | 5.924343885  |

|    |              |              |              |
|----|--------------|--------------|--------------|
| Ti | -0.025620798 | 13.179339516 | 1.507084889  |
| Ti | -0.025245941 | 13.175986933 | 4.463428150  |
| Ti | 3.218816095  | 12.994470608 | 2.963829033  |
| Ti | 3.218146133  | 12.997458857 | 5.921578243  |
| Ti | 6.470118607  | 13.025463247 | 1.516626881  |
| Ti | 6.467954154  | 13.125032388 | 4.469447879  |
| Ti | 9.717544223  | 12.995793639 | 2.967467463  |
| Ti | 9.718472273  | 12.994658847 | 5.924994631  |
| Ti | -0.024463496 | 13.178815876 | 7.422890168  |
| Ti | -0.024356728 | 13.179090912 | 10.379952315 |
| Ti | 3.220294610  | 12.997647454 | 8.879896574  |
| Ti | 3.220373842  | 12.998117158 | 0.008255286  |
| Ti | 6.468074950  | 13.078129803 | 7.361743557  |
| Ti | 6.466781005  | 13.002242700 | 10.345406215 |
| Ti | 9.717394592  | 12.996058316 | 8.882657130  |
| Ti | 9.716643839  | 12.996734834 | 0.009406425  |
| Ti | 9.705316437  | 16.329069010 | 1.483170288  |
| Ti | 9.717444988  | 16.311541352 | 4.439265364  |
| Ti | 6.450504870  | 16.344837508 | 2.974407416  |
| Ti | -0.039031474 | 16.633108203 | 5.920017800  |
| Ti | 3.199104552  | 16.321666967 | 1.480816552  |
| Ti | 3.188616096  | 16.309441434 | 4.439204915  |

|    |              |              |              |
|----|--------------|--------------|--------------|
| Ti | -0.045039833 | 16.641455727 | 2.957353155  |
| Ti | 6.457860947  | 16.465939832 | 5.914678037  |
| Ti | 3.197114538  | 16.324735227 | 7.399630454  |
| Ti | 3.201516442  | 16.335983132 | 10.354249196 |
| Ti | -0.043925654 | 16.642118314 | 8.877835385  |
| Ti | 6.456509462  | 16.272725900 | 0.005820281  |
| Ti | 9.712996584  | 16.314436732 | 7.397568791  |
| Ti | 9.708440892  | 16.315383642 | 10.356414013 |
| Ti | 6.448196241  | 16.275355531 | 8.868468826  |
| Ti | -0.039559469 | 16.642501936 | 0.003153416  |
| Ti | 6.636352387  | 19.747563424 | 7.315114113  |
| Ti | 6.428331949  | 19.591173254 | 10.218245941 |
| Ti | 3.235440070  | 19.619246581 | 8.881840296  |
| Ti | 3.212109458  | 19.575334032 | 0.002635635  |
| Ti | 6.431677474  | 19.634314630 | 1.715378829  |
| Ti | 6.418048716  | 20.077671752 | 4.467654157  |
| Ti | 3.209175937  | 19.567347983 | 2.933037767  |
| Ti | 3.128761887  | 19.553517597 | 5.876349541  |
| Ti | -0.072223833 | 20.006052352 | 1.479520028  |
| Ti | -0.063103487 | 20.005915191 | 4.429692970  |
| Ti | 9.641936028  | 19.580450060 | 2.960866428  |
| Ti | 9.743413496  | 19.565785993 | 5.891113592  |

|    |              |              |              |
|----|--------------|--------------|--------------|
| Ti | -0.036104318 | 20.002369369 | 7.396608819  |
| Ti | -0.028732395 | 20.010611879 | 10.353508427 |
| Ti | 9.756048871  | 19.569502552 | 8.917558945  |
| Ti | 9.655274617  | 19.569318599 | 0.019269827  |
| O  | 0.000000000  | 1.266689833  | 2.957400000  |
| O  | 0.000000000  | 1.266689833  | 0.000000000  |
| O  | 0.000000000  | 1.266689833  | 8.872200000  |
| O  | 0.000000000  | 1.266689833  | 5.914800000  |
| O  | 6.494400000  | 1.266689833  | 2.957400000  |
| O  | 6.494400000  | 1.266689833  | 0.000000000  |
| O  | 6.494400000  | 1.266689833  | 8.872200000  |
| O  | 6.494400000  | 1.266689833  | 5.914800000  |
| O  | 9.741600000  | 1.980499953  | 8.872200000  |
| O  | 9.741600000  | 1.980499953  | 5.914800000  |
| O  | 9.741600000  | 1.980499953  | 2.957400000  |
| O  | 9.741600000  | 1.980499953  | 0.000000000  |
| O  | 3.247200000  | 1.980499953  | 8.872200000  |
| O  | 3.247200000  | 1.980499953  | 5.914800000  |
| O  | 3.247200000  | 1.980499953  | 2.957400000  |
| O  | 3.247200000  | 1.980499953  | 0.000000000  |
| O  | 1.266699988  | 3.247190143  | 1.478700000  |
| O  | 1.266699988  | 3.247190143  | 4.436100000  |

|   |              |             |              |
|---|--------------|-------------|--------------|
| O | 5.227599998  | 3.247190143 | 1.478700000  |
| O | 5.227599998  | 3.247190143 | 4.436100000  |
| O | 1.266699988  | 3.247190143 | 7.393500000  |
| O | 1.266699988  | 3.247190143 | 10.350900000 |
| O | 5.227599998  | 3.247190143 | 7.393500000  |
| O | 5.227599998  | 3.247190143 | 10.350900000 |
| O | 7.761099988  | 3.247190143 | 1.478700000  |
| O | 7.761099988  | 3.247190143 | 4.436100000  |
| O | 11.721999998 | 3.247190143 | 1.478700000  |
| O | 11.721999998 | 3.247190143 | 4.436100000  |
| O | 7.761099988  | 3.247190143 | 7.393500000  |
| O | 7.761099988  | 3.247190143 | 10.350900000 |
| O | 11.721999998 | 3.247190143 | 7.393500000  |
| O | 11.721999998 | 3.247190143 | 10.350900000 |
| O | 9.741600000  | 4.513899978 | 8.872200000  |
| O | 9.741600000  | 4.513899978 | 5.914800000  |
| O | 9.741600000  | 4.513899978 | 2.957400000  |
| O | 9.741600000  | 4.513899978 | 0.000000000  |
| O | 3.247200000  | 4.513899978 | 8.872200000  |
| O | 3.247200000  | 4.513899978 | 5.914800000  |
| O | 3.247200000  | 4.513899978 | 2.957400000  |
| O | 3.247200000  | 4.513899978 | 0.000000000  |

|   |              |             |              |
|---|--------------|-------------|--------------|
| O | 0.000000000  | 5.227600085 | 2.957400000  |
| O | 0.000000000  | 5.227600085 | 0.000000000  |
| O | 0.000000000  | 5.227600085 | 8.872200000  |
| O | 0.000000000  | 5.227600085 | 5.914800000  |
| O | 6.494400000  | 5.227600085 | 0.000000000  |
| O | 6.494400000  | 5.227600085 | 2.957400000  |
| O | 6.494400000  | 5.227600085 | 8.872200000  |
| O | 6.494400000  | 5.227600085 | 5.914800000  |
| O | 8.474900012  | 6.494389931 | 7.393500000  |
| O | 11.008299988 | 6.494389931 | 7.393500000  |
| O | 8.474900012  | 6.494389931 | 10.350900000 |
| O | 11.008299988 | 6.494389931 | 10.350900000 |
| O | 8.474900012  | 6.494389931 | 1.478700000  |
| O | 11.008299988 | 6.494389931 | 1.478700000  |
| O | 8.474900012  | 6.494389931 | 4.436100000  |
| O | 11.008299988 | 6.494389931 | 4.436100000  |
| O | 1.980500012  | 6.494389931 | 1.478700000  |
| O | 4.513899988  | 6.494389931 | 1.478700000  |
| O | 1.980500012  | 6.494389931 | 4.436100000  |
| O | 4.513899988  | 6.494389931 | 4.436100000  |
| O | 1.980500012  | 6.494389931 | 7.393500000  |
| O | 4.513899988  | 6.494389931 | 7.393500000  |

|   |             |             |              |
|---|-------------|-------------|--------------|
| O | 1.980500012 | 6.494389931 | 10.350900000 |
| O | 4.513899988 | 6.494389931 | 10.350900000 |
| O | 0.000000000 | 7.761090122 | 8.872200000  |
| O | 0.000000000 | 7.761090122 | 5.914800000  |
| O | 6.494400000 | 7.761090122 | 2.957400000  |
| O | 6.494400000 | 7.761090122 | 0.000000000  |
| O | 0.000000000 | 7.761090122 | 2.957400000  |
| O | 0.000000000 | 7.761090122 | 0.000000000  |
| O | 6.494400000 | 7.761090122 | 8.872200000  |
| O | 6.494400000 | 7.761090122 | 5.914800000  |
| O | 3.247200000 | 8.474889884 | 2.957400000  |
| O | 3.247200000 | 8.474889884 | 0.000000000  |
| O | 3.247200000 | 8.474889884 | 8.872200000  |
| O | 3.247200000 | 8.474889884 | 5.914800000  |
| O | 9.741600000 | 8.474889884 | 2.957400000  |
| O | 9.741600000 | 8.474889884 | 0.000000000  |
| O | 9.741600000 | 8.474889884 | 8.872200000  |
| O | 9.741600000 | 8.474889884 | 5.914800000  |
| O | 1.271696390 | 9.787246425 | 1.479048855  |
| O | 1.272155284 | 9.787994737 | 4.436063210  |
| O | 5.213113589 | 9.775290570 | 1.483926081  |
| O | 5.213141905 | 9.773902531 | 4.440450335  |



|   |              |              |              |
|---|--------------|--------------|--------------|
| O | 1.271132416  | 9.787778638  | 7.394090534  |
| O | 1.270748078  | 9.786865303  | 10.350516721 |
| O | 5.212295555  | 9.775745630  | 7.395859177  |
| O | 5.212322701  | 9.773938607  | 10.356090592 |
| O | 7.761021926  | 9.782700828  | 1.482741228  |
| O | 7.761374182  | 9.780417314  | 4.440848756  |
| O | 11.703443159 | 9.781491027  | 1.479205479  |
| O | 11.703794376 | 9.781404587  | 4.436214511  |
| O | 7.760338455  | 9.782241482  | 7.396601721  |
| O | 7.759740710  | 9.781269212  | 10.355358340 |
| O | 11.703014529 | 9.781393157  | 7.392505722  |
| O | 11.702782679 | 9.780703066  | 10.351477284 |
| O | 9.726789261  | 11.073487038 | 2.959973529  |
| O | 9.726055264  | 11.073253436 | 0.002037530  |
| O | 3.246003472  | 11.073733142 | 2.958797312  |
| O | 3.244302329  | 11.074543248 | 0.001463203  |
| O | 3.245165045  | 11.075117252 | 8.874418760  |
| O | 3.245909952  | 11.074824356 | 5.915984025  |
| O | 9.727584046  | 11.072635498 | 8.874994388  |
| O | 9.725002522  | 11.073263437 | 5.915943213  |
| O | 6.466337308  | 11.789351714 | 8.871227489  |
| O | -0.021919249 | 11.800324226 | 2.956068815  |

|   |              |              |              |
|---|--------------|--------------|--------------|
| O | 6.468794529  | 11.790906204 | 0.009429611  |
| O | 6.471725971  | 11.803292473 | 5.911206168  |
| O | -0.022014847 | 11.799963821 | -0.001332250 |
| O | -0.021648953 | 11.800013471 | 5.913174495  |
| O | 6.467656580  | 11.799583414 | 2.974544639  |
| O | -0.023048626 | 11.799929174 | 8.871124689  |
| O | 8.436909201  | 13.092974609 | 1.484445873  |
| O | 8.440261220  | 13.105545902 | 4.437626018  |
| O | 10.973698734 | 13.115266106 | 1.481685791  |
| O | 10.974140873 | 13.114085951 | 4.440794932  |
| O | 1.965075812  | 13.105181925 | 1.481475579  |
| O | 1.964543661  | 13.101650748 | 4.438692930  |
| O | 4.500200961  | 13.111006618 | 1.480535717  |
| O | 4.498017803  | 13.121782319 | 4.439589495  |
| O | 1.965054640  | 13.102594800 | 7.399586093  |
| O | 1.965456514  | 13.104797232 | 10.354849075 |
| O | 4.498751540  | 13.114764612 | 7.399815114  |
| O | 4.501655187  | 13.110512982 | 10.356093431 |
| O | 8.439805054  | 13.094388723 | 7.402279929  |
| O | 8.435920103  | 13.092451326 | 10.356333572 |
| O | 10.974272709 | 13.112732559 | 7.398150334  |
| O | 10.973167103 | 13.117693210 | 10.358530565 |

|   |              |              |              |
|---|--------------|--------------|--------------|
| O | -0.025755881 | 14.411246569 | 2.964966449  |
| O | -0.021978998 | 14.411952019 | 5.922009313  |
| O | -0.024184366 | 14.411244069 | 8.879608997  |
| O | -0.022172141 | 14.411990952 | 0.007327727  |
| O | 6.462135691  | 14.421893681 | 2.946292715  |
| O | 6.479321432  | 14.427219023 | 5.928995047  |
| O | 6.467762699  | 14.396642152 | 8.887381990  |
| O | 6.473748717  | 14.410610057 | 0.005026634  |
| O | 9.693434672  | 15.112902595 | 8.879855526  |
| O | 3.214792295  | 15.128521787 | 8.882249127  |
| O | 9.699907900  | 15.112146781 | 5.922706905  |
| O | 9.694192698  | 15.118101134 | 2.952120686  |
| O | 3.216349522  | 15.115821192 | 2.954481756  |
| O | 9.678207642  | 15.117882891 | 0.011142537  |
| O | 3.217966368  | 15.124676640 | -0.004728409 |
| O | 3.199185212  | 15.116272323 | 5.923732413  |
| O | 1.252673643  | 16.488739611 | 10.349476781 |
| O | 5.170642032  | 16.436993176 | 4.454725823  |
| O | 5.175594531  | 16.426360709 | 7.388496079  |
| O | 7.725049054  | 16.500016805 | 1.485514204  |
| O | 7.738477265  | 16.434954694 | 4.441337792  |
| O | 5.181712516  | 16.468820567 | 10.363976322 |

|   |              |              |              |
|---|--------------|--------------|--------------|
| O | 11.657791164 | 16.471966338 | 1.479082924  |
| O | 11.662074221 | 16.464535362 | 4.439490245  |
| O | 1.247438767  | 16.479924882 | 4.437719354  |
| O | 1.247616454  | 16.473858729 | 1.481212489  |
| O | 5.179280233  | 16.486324294 | 1.474823795  |
| O | 7.738823936  | 16.457069739 | 7.410140698  |
| O | 7.725073084  | 16.487282634 | 10.350155327 |
| O | 1.249401894  | 16.484541560 | 7.403933116  |
| O | 11.662183976 | 16.464884337 | 7.397624745  |
| O | 11.660104080 | 16.459524347 | 10.359552643 |
| O | 3.268370055  | 17.790458684 | 8.861726309  |
| O | 3.222439710  | 17.754714349 | -0.001300901 |
| O | 9.668752055  | 17.755219416 | 2.971677617  |
| O | 9.687772335  | 17.743396078 | 5.917246361  |
| O | 3.224983307  | 17.742824932 | 2.957151105  |
| O | 3.229937105  | 17.740112076 | 5.921513653  |
| O | 9.691619357  | 17.749013958 | 8.885817644  |
| O | 9.681088038  | 17.747195148 | -0.000317270 |
| O | 6.462821629  | 18.699515146 | 0.007977054  |
| O | 6.499949595  | 18.518667837 | 5.932888050  |
| O | -0.043107489 | 18.517336591 | -0.001901253 |
| O | 6.432432643  | 18.487086192 | 3.106145627  |

|   |              |              |              |
|---|--------------|--------------|--------------|
| O | -0.048291579 | 18.509407336 | 5.917064777  |
| O | 6.373215016  | 18.463058395 | 8.788882826  |
| O | -0.063291435 | 18.515152019 | 8.883343601  |
| O | -0.055240197 | 18.514025442 | 2.955010776  |
| O | 1.961914598  | 19.934928374 | 4.407165272  |
| O | 4.485352814  | 19.963702508 | 1.458363735  |
| O | 4.422710559  | 19.947180696 | 4.448818831  |
| O | 1.987219248  | 19.919841036 | 7.412622430  |
| O | 2.013416748  | 19.964856588 | 10.320284995 |
| O | 4.441186867  | 20.205244211 | 7.296035926  |
| O | 4.513513182  | 20.014721704 | 10.370030238 |
| O | 8.388169248  | 19.967441213 | 1.472478222  |
| O | 8.431502483  | 20.011927766 | 4.496854933  |
| O | 10.882068595 | 19.956026500 | 1.492332431  |
| O | 10.911072715 | 19.948386211 | 4.419280320  |
| O | 8.486731120  | 20.027558032 | 7.411713562  |
| O | 8.404291077  | 19.989516967 | 10.353222979 |
| O | 10.918271758 | 19.947086398 | 7.408643544  |
| O | 10.910886976 | 19.969159652 | 10.383594412 |
| O | 1.986435634  | 19.946501321 | 1.467536643  |
| O | 6.435270047  | 21.073528894 | 2.930520073  |
| O | 6.214879985  | 21.156531574 | 6.056703505  |

|   |              |              |              |
|---|--------------|--------------|--------------|
| O | -0.049783473 | 21.120081790 | 2.954512986  |
| O | -0.042227888 | 21.111656755 | 5.916152005  |
| O | -0.042859793 | 21.118824839 | 8.874648727  |
| O | -0.034538128 | 21.119391342 | 0.001521878  |
| O | 6.472156420  | 21.139115002 | 8.956925251  |
| H | 0.000000000  | 0.932899949  | 9.814800036  |
| H | 0.816399984  | 0.932899949  | 8.400899982  |
| H | 6.457700016  | 0.932899949  | 6.856699960  |
| H | 0.834099951  | 0.932899949  | -0.439200043 |
| H | 0.000000000  | 0.932899949  | 3.900000036  |
| H | 0.816399984  | 0.932899949  | 2.486099982  |
| H | 6.457700016  | 0.932899949  | 0.941899960  |
| H | 0.834099951  | 0.932899949  | 5.475599957  |
| H | 6.494400000  | 0.932899949  | 9.814800036  |
| H | 7.310799984  | 0.932899949  | 8.400899982  |
| H | -0.036699984 | 0.932899949  | 6.856699960  |
| H | 7.328499951  | 0.932899949  | -0.439200043 |
| H | 6.494400000  | 0.932899949  | 3.900000036  |
| H | 7.310799984  | 0.932899949  | 2.486099982  |
| H | -0.036699984 | 0.932899949  | 0.941899960  |
| H | 7.328499951  | 0.932899949  | 5.475599957  |
| H | 5.103689574  | 20.959618228 | 6.665571124  |

H 7.265971738 21.702761485 8.976783483

8-e:

|    |             |             |              |
|----|-------------|-------------|--------------|
| Ti | 3.247200000 | 3.247194072 | 1.478700000  |
| Ti | 3.247200000 | 3.247194072 | 4.436100000  |
| Ti | 0.000000000 | 3.247194072 | 2.957400000  |
| Ti | 0.000000000 | 3.247194072 | 0.000000000  |
| Ti | 3.247200000 | 3.247194072 | 7.393500000  |
| Ti | 3.247200000 | 3.247194072 | 10.350900000 |
| Ti | 0.000000000 | 3.247194072 | 8.872200000  |
| Ti | 0.000000000 | 3.247194072 | 5.914800000  |
| Ti | 9.741600000 | 3.247194072 | 1.478700000  |
| Ti | 9.741600000 | 3.247194072 | 4.436100000  |
| Ti | 6.494400000 | 3.247194072 | 2.957400000  |
| Ti | 6.494400000 | 3.247194072 | 0.000000000  |
| Ti | 9.741600000 | 3.247194072 | 7.393500000  |
| Ti | 9.741600000 | 3.247194072 | 10.350900000 |
| Ti | 6.494400000 | 3.247194072 | 8.872200000  |
| Ti | 6.494400000 | 3.247194072 | 5.914800000  |
| Ti | 0.000000000 | 6.494391717 | 4.436100000  |
| Ti | 0.000000000 | 6.494391717 | 1.478700000  |
| Ti | 3.247200000 | 6.494391717 | 2.957400000  |
| Ti | 3.247200000 | 6.494391717 | 0.000000000  |

|    |              |             |              |
|----|--------------|-------------|--------------|
| Ti | 0.000000000  | 6.494391717 | 10.350900000 |
| Ti | 0.000000000  | 6.494391717 | 7.393500000  |
| Ti | 3.247200000  | 6.494391717 | 8.872200000  |
| Ti | 3.247200000  | 6.494391717 | 5.914800000  |
| Ti | 6.494400000  | 6.494391717 | 4.436100000  |
| Ti | 6.494400000  | 6.494391717 | 1.478700000  |
| Ti | 9.741600000  | 6.494391717 | 2.957400000  |
| Ti | 9.741600000  | 6.494391717 | 0.000000000  |
| Ti | 6.494400000  | 6.494391717 | 10.350900000 |
| Ti | 6.494400000  | 6.494391717 | 7.393500000  |
| Ti | 9.741600000  | 6.494391717 | 8.872200000  |
| Ti | 9.741600000  | 6.494391717 | 5.914800000  |
| Ti | 3.228302335  | 9.736269734 | 1.478012819  |
| Ti | 3.227749532  | 9.736333671 | 4.436449920  |
| Ti | -0.011635367 | 9.837456944 | 2.958996168  |
| Ti | -0.013444317 | 9.836984382 | 0.002310439  |
| Ti | 3.226272316  | 9.736283307 | 7.394004296  |
| Ti | 3.227670170  | 9.737287725 | 10.351513956 |
| Ti | -0.015559154 | 9.835784224 | 8.878057663  |
| Ti | -0.008483115 | 9.836087478 | 5.918288076  |
| Ti | 9.737597371  | 9.739576954 | 1.481303103  |
| Ti | 9.742485317  | 9.736725865 | 4.436700352  |



|    |              |              |              |
|----|--------------|--------------|--------------|
| Ti | 6.483074806  | 9.757288921  | 2.973659549  |
| Ti | 6.482454590  | 9.734741676  | 0.013175808  |
| Ti | 9.740526606  | 9.734650593  | 7.396199633  |
| Ti | 9.731570698  | 9.736558343  | 10.354499274 |
| Ti | 6.478488330  | 9.750286574  | 8.878286566  |
| Ti | 6.486714007  | 9.756620977  | 5.924357725  |
| Ti | -0.026731600 | 13.178196152 | 1.506863084  |
| Ti | -0.028990742 | 13.173547685 | 4.463091480  |
| Ti | 3.217248217  | 12.988475893 | 2.962082037  |
| Ti | 3.213988028  | 12.990230051 | 5.918168597  |
| Ti | 6.466905178  | 13.017650079 | 1.518388426  |
| Ti | 6.466629816  | 13.134894754 | 4.480466087  |
| Ti | 9.714942177  | 12.993776231 | 2.965513686  |
| Ti | 9.715430426  | 12.989476381 | 5.923973382  |
| Ti | -0.029401188 | 13.172994755 | 7.423375773  |
| Ti | -0.026891752 | 13.175560092 | 10.380448093 |
| Ti | 3.214725402  | 12.989560321 | 8.876761375  |
| Ti | 3.218093398  | 12.992711091 | 0.005429550  |
| Ti | 6.464527838  | 13.096611158 | 7.364580413  |
| Ti | 6.465063237  | 13.008793202 | 10.341625002 |
| Ti | 9.714686167  | 12.988551260 | 8.880730679  |
| Ti | 9.716106622  | 12.995982235 | 0.008754850  |

|    |              |              |              |
|----|--------------|--------------|--------------|
| Ti | 9.708662741  | 16.321247269 | 1.483665711  |
| Ti | 9.715233126  | 16.304910125 | 4.437990607  |
| Ti | 6.451780890  | 16.341331691 | 2.977766194  |
| Ti | -0.040192153 | 16.623031166 | 5.920958017  |
| Ti | 3.199215996  | 16.317880041 | 1.485705253  |
| Ti | 3.193836295  | 16.300633492 | 4.441169575  |
| Ti | -0.043809924 | 16.635950361 | 2.960332321  |
| Ti | 6.453218490  | 16.527301101 | 5.921042717  |
| Ti | 3.188893407  | 16.308615968 | 7.400090743  |
| Ti | 3.200121575  | 16.305694870 | 10.359993295 |
| Ti | -0.045141665 | 16.629920641 | 8.881909381  |
| Ti | 6.455284359  | 16.270781716 | 0.005401395  |
| Ti | 9.714948671  | 16.304268255 | 7.396072465  |
| Ti | 9.704866634  | 16.309621100 | 10.356512790 |
| Ti | 6.448186369  | 16.299211519 | 8.866028616  |
| Ti | -0.042518967 | 16.641312851 | 0.004841500  |
| Ti | 6.590934840  | 19.885576539 | 7.251987937  |
| Ti | 6.411502621  | 19.580539358 | 10.191344839 |
| Ti | 3.116167297  | 19.565020892 | 8.957180061  |
| Ti | 3.228544706  | 19.557673857 | 0.029305468  |
| Ti | 6.446698242  | 19.608375869 | 1.699662023  |
| Ti | 6.426797452  | 20.081410815 | 4.446925385  |

|    |              |              |              |
|----|--------------|--------------|--------------|
| Ti | 3.232101429  | 19.561596514 | 2.932612848  |
| Ti | 3.097371854  | 19.556703015 | 5.836565414  |
| Ti | -0.057699237 | 20.002694411 | 1.480446759  |
| Ti | -0.089194219 | 19.998944276 | 4.431118674  |
| Ti | 9.668081703  | 19.565866718 | 2.956372599  |
| Ti | 9.713671482  | 19.554454148 | 5.900998524  |
| Ti | -0.057542073 | 19.994265805 | 7.397221237  |
| Ti | -0.089647529 | 20.009304207 | 10.361395813 |
| Ti | 9.720322397  | 19.558798647 | 8.902080860  |
| Ti | 9.646823454  | 19.562434124 | 0.015812035  |
| O  | 0.000000000  | 1.266694833  | 2.957400000  |
| O  | 0.000000000  | 1.266694833  | 0.000000000  |
| O  | 0.000000000  | 1.266694833  | 8.872200000  |
| O  | 0.000000000  | 1.266694833  | 5.914800000  |
| O  | 6.494400000  | 1.266694833  | 2.957400000  |
| O  | 6.494400000  | 1.266694833  | 0.000000000  |
| O  | 6.494400000  | 1.266694833  | 8.872200000  |
| O  | 6.494400000  | 1.266694833  | 5.914800000  |
| O  | 9.741600000  | 1.980495667  | 8.872200000  |
| O  | 9.741600000  | 1.980495667  | 5.914800000  |
| O  | 9.741600000  | 1.980495667  | 2.957400000  |
| O  | 9.741600000  | 1.980495667  | 0.000000000  |

|   |              |             |              |
|---|--------------|-------------|--------------|
| O | 3.247200000  | 1.980495667 | 8.872200000  |
| O | 3.247200000  | 1.980495667 | 5.914800000  |
| O | 3.247200000  | 1.980495667 | 2.957400000  |
| O | 3.247200000  | 1.980495667 | 0.000000000  |
| O | 1.266698949  | 3.247194072 | 1.478700000  |
| O | 1.266698949  | 3.247194072 | 4.436100000  |
| O | 5.227599738  | 3.247194072 | 1.478700000  |
| O | 5.227599738  | 3.247194072 | 4.436100000  |
| O | 1.266698949  | 3.247194072 | 7.393500000  |
| O | 1.266698949  | 3.247194072 | 10.350900000 |
| O | 5.227599738  | 3.247194072 | 7.393500000  |
| O | 5.227599738  | 3.247194072 | 10.350900000 |
| O | 7.761098949  | 3.247194072 | 1.478700000  |
| O | 7.761098949  | 3.247194072 | 4.436100000  |
| O | 11.721999738 | 3.247194072 | 1.478700000  |
| O | 11.721999738 | 3.247194072 | 4.436100000  |
| O | 7.761098949  | 3.247194072 | 7.393500000  |
| O | 7.761098949  | 3.247194072 | 10.350900000 |
| O | 11.721999738 | 3.247194072 | 7.393500000  |
| O | 11.721999738 | 3.247194072 | 10.350900000 |
| O | 9.741600000  | 4.513896049 | 8.872200000  |
| O | 9.741600000  | 4.513896049 | 5.914800000  |

|   |              |             |              |
|---|--------------|-------------|--------------|
| O | 9.741600000  | 4.513896049 | 2.957400000  |
| O | 9.741600000  | 4.513896049 | 0.000000000  |
| O | 3.247200000  | 4.513896049 | 8.872200000  |
| O | 3.247200000  | 4.513896049 | 5.914800000  |
| O | 3.247200000  | 4.513896049 | 2.957400000  |
| O | 3.247200000  | 4.513896049 | 0.000000000  |
| O | 0.000000000  | 5.227596870 | 2.957400000  |
| O | 0.000000000  | 5.227596870 | 0.000000000  |
| O | 0.000000000  | 5.227596870 | 8.872200000  |
| O | 0.000000000  | 5.227596870 | 5.914800000  |
| O | 6.494400000  | 5.227596870 | 0.000000000  |
| O | 6.494400000  | 5.227596870 | 2.957400000  |
| O | 6.494400000  | 5.227596870 | 8.872200000  |
| O | 6.494400000  | 5.227596870 | 5.914800000  |
| O | 8.474899752  | 6.494391717 | 7.393500000  |
| O | 11.008298949 | 6.494391717 | 7.393500000  |
| O | 8.474899752  | 6.494391717 | 10.350900000 |
| O | 11.008298949 | 6.494391717 | 10.350900000 |
| O | 8.474899752  | 6.494391717 | 1.478700000  |
| O | 11.008298949 | 6.494391717 | 1.478700000  |
| O | 8.474899752  | 6.494391717 | 4.436100000  |
| O | 11.008298949 | 6.494391717 | 4.436100000  |

|   |             |             |              |
|---|-------------|-------------|--------------|
| O | 1.980499752 | 6.494391717 | 1.478700000  |
| O | 4.513898949 | 6.494391717 | 1.478700000  |
| O | 1.980499752 | 6.494391717 | 4.436100000  |
| O | 4.513898949 | 6.494391717 | 4.436100000  |
| O | 1.980499752 | 6.494391717 | 7.393500000  |
| O | 4.513898949 | 6.494391717 | 7.393500000  |
| O | 1.980499752 | 6.494391717 | 10.350900000 |
| O | 4.513898949 | 6.494391717 | 10.350900000 |
| O | 0.000000000 | 7.761086550 | 8.872200000  |
| O | 0.000000000 | 7.761086550 | 5.914800000  |
| O | 6.494400000 | 7.761086550 | 2.957400000  |
| O | 6.494400000 | 7.761086550 | 0.000000000  |
| O | 0.000000000 | 7.761086550 | 2.957400000  |
| O | 0.000000000 | 7.761086550 | 0.000000000  |
| O | 6.494400000 | 7.761086550 | 8.872200000  |
| O | 6.494400000 | 7.761086550 | 5.914800000  |
| O | 3.247200000 | 8.474887384 | 2.957400000  |
| O | 3.247200000 | 8.474887384 | 0.000000000  |
| O | 3.247200000 | 8.474887384 | 8.872200000  |
| O | 3.247200000 | 8.474887384 | 5.914800000  |
| O | 9.741600000 | 8.474887384 | 2.957400000  |
| O | 9.741600000 | 8.474887384 | 0.000000000  |

|   |              |              |              |
|---|--------------|--------------|--------------|
| O | 9.741600000  | 8.474887384  | 8.872200000  |
| O | 9.741600000  | 8.474887384  | 5.914800000  |
| O | 1.270363219  | 9.786528474  | 1.479892779  |
| O | 1.270909918  | 9.787117837  | 4.437687532  |
| O | 5.211969146  | 9.775433803  | 1.483694221  |
| O | 5.212677425  | 9.773768942  | 4.441576632  |
| O | 1.270290222  | 9.786883877  | 7.395852079  |
| O | 1.269406594  | 9.785711938  | 10.351650825 |
| O | 5.211822892  | 9.775567392  | 7.395401726  |
| O | 5.211426994  | 9.773871812  | 10.356681954 |
| O | 7.759860727  | 9.782348639  | 1.482977820  |
| O | 7.760685516  | 9.780901664  | 4.440744774  |
| O | 11.701611349 | 9.779162150  | 1.480422626  |
| O | 11.702631099 | 9.780316230  | 4.438616156  |
| O | 7.759875404  | 9.781774635  | 7.397808222  |
| O | 7.758750964  | 9.781399586  | 10.355289610 |
| O | 11.701699543 | 9.779326457  | 7.393713761  |
| O | 11.700554450 | 9.778879612  | 10.352460443 |
| O | 9.725976422  | 11.070585943 | 2.959633074  |
| O | 9.725336464  | 11.071216026 | 0.001485088  |
| O | 3.244978655  | 11.069703327 | 2.959292618  |
| O | 3.244216083  | 11.070502718 | 0.001636152  |

|   |              |              |              |
|---|--------------|--------------|--------------|
| O | 3.244344153  | 11.069746904 | 8.874189857  |
| O | 3.245004893  | 11.070623805 | 5.915483041  |
| O | 9.725757950  | 11.069262555 | 8.874772228  |
| O | 9.724494140  | 11.070145528 | 5.917180825  |
| O | 6.466857250  | 11.794194135 | 8.871797912  |
| O | -0.024210084 | 11.797839614 | 2.957561592  |
| O | 6.467715809  | 11.793481542 | 0.008124214  |
| O | 6.468908181  | 11.808690324 | 5.915188129  |
| O | -0.024762887 | 11.797091301 | -0.000542387 |
| O | -0.024593643 | 11.798387900 | 5.914230050  |
| O | 6.468408242  | 11.799984181 | 2.974463607  |
| O | -0.026072938 | 11.797249894 | 8.871911358  |
| O | 8.436162474  | 13.091130081 | 1.482951085  |
| O | 8.439340314  | 13.098505692 | 4.438771833  |
| O | 10.972510519 | 13.112144625 | 1.482469502  |
| O | 10.972858489 | 13.110716223 | 4.440705973  |
| O | 1.962672104  | 13.096693668 | 1.482050734  |
| O | 1.961634040  | 13.095843200 | 4.438637804  |
| O | 4.499145491  | 13.106292428 | 1.482213273  |
| O | 4.495652932  | 13.116186584 | 4.438104289  |
| O | 1.960697417  | 13.092729219 | 7.397831290  |
| O | 1.962342838  | 13.097723804 | 10.355841579 |



|   |              |              |              |
|---|--------------|--------------|--------------|
| O | 4.494610841  | 13.109321397 | 7.400264402  |
| O | 4.498998328  | 13.107052528 | 10.356121822 |
| O | 8.438937272  | 13.093162848 | 7.402439984  |
| O | 8.435323788  | 13.091719801 | 10.356986921 |
| O | 10.972898234 | 13.109613578 | 7.399068548  |
| O | 10.971991227 | 13.114028444 | 10.356805810 |
| O | -0.024003302 | 14.408881616 | 2.965799962  |
| O | -0.024153063 | 14.409834241 | 5.923179142  |
| O | -0.024952134 | 14.407982569 | 8.879996180  |
| O | -0.023414390 | 14.408045077 | 0.008273031  |
| O | 6.468173664  | 14.418471803 | 2.951091393  |
| O | 6.472691039  | 14.426862547 | 5.928762713  |
| O | 6.466969733  | 14.405444736 | 8.887311013  |
| O | 6.469312133  | 14.409582422 | 0.005509281  |
| O | 9.689663764  | 15.108265200 | 8.880188884  |
| O | 3.208534161  | 15.109516079 | 8.880149136  |
| O | 9.698175974  | 15.105386965 | 5.922039242  |
| O | 9.688519450  | 15.109013513 | 2.955773312  |
| O | 3.212247659  | 15.109142458 | 2.957037304  |
| O | 9.680203371  | 15.111469192 | 0.008434860  |
| O | 3.214001277  | 15.109461071 | 0.009055086  |
| O | 3.196323780  | 15.106839299 | 5.924160881  |

|   |              |              |              |
|---|--------------|--------------|--------------|
| O | 1.249383580  | 16.475607887 | 10.356958885 |
| O | 5.169320551  | 16.431867503 | 4.458038348  |
| O | 5.166578486  | 16.430739855 | 7.392625674  |
| O | 7.725062303  | 16.493438442 | 1.483973399  |
| O | 7.735767152  | 16.449409091 | 4.451978044  |
| O | 5.175728965  | 16.462747628 | 10.359070350 |
| O | 11.659216815 | 16.457536229 | 1.481735594  |
| O | 11.661847566 | 16.459715444 | 4.443637348  |
| O | 1.249314869  | 16.480038111 | 4.440353924  |
| O | 1.248282389  | 16.477540641 | 1.483717880  |
| O | 5.179448568  | 16.476320480 | 1.479615729  |
| O | 7.735138754  | 16.457546231 | 7.400725875  |
| O | 7.724440399  | 16.481318279 | 10.352793327 |
| O | 1.246190413  | 16.473445460 | 7.404451725  |
| O | 11.661066420 | 16.461643911 | 7.401291684  |
| O | 11.658220444 | 16.456589676 | 10.358808916 |
| O | 3.231400164  | 17.754504322 | 8.877122415  |
| O | 3.226884088  | 17.736429449 | 0.002408388  |
| O | 9.683211967  | 17.739937410 | 2.966179574  |
| O | 9.687395400  | 17.735295015 | 5.922403594  |
| O | 3.237453594  | 17.737216338 | 2.965394444  |
| O | 3.228250770  | 17.747642707 | 5.927173762  |

|   |              |              |              |
|---|--------------|--------------|--------------|
| O | 9.684532538  | 17.740262452 | 8.884209055  |
| O | 9.681331448  | 17.741335093 | -0.000229376 |
| O | 6.444905918  | 18.683022624 | -0.017991284 |
| O | 6.440775869  | 18.550224122 | 5.945881683  |
| O | -0.064564597 | 18.515582790 | 0.002908662  |
| O | 6.426706401  | 18.466243814 | 3.092668282  |
| O | -0.042244124 | 18.505163922 | 5.928171115  |
| O | 6.394982296  | 18.473284738 | 8.775187698  |
| O | -0.049174428 | 18.511264009 | 8.884231531  |
| O | -0.071150568 | 18.509545211 | 2.958088364  |
| O | 1.945848101  | 19.905597738 | 4.398437274  |
| O | 4.495280543  | 19.960000593 | 1.457649700  |
| O | 4.418061348  | 19.989419097 | 4.470884584  |
| O | 2.017141027  | 19.955898626 | 7.407632113  |
| O | 1.964789019  | 19.945582986 | 10.387972783 |
| O | 4.458202585  | 20.216324237 | 7.422321756  |
| O | 4.474296098  | 19.991872276 | 10.349232736 |
| O | 8.395195669  | 19.943776678 | 1.470419162  |
| O | 8.443685328  | 19.955101736 | 4.458615869  |
| O | 10.882464494 | 19.955008152 | 1.474465240  |
| O | 10.906064494 | 19.946081980 | 4.433379310  |
| O | 8.483214143  | 20.026446815 | 7.419228552  |

|   |              |              |              |
|---|--------------|--------------|--------------|
| O | 8.385596686  | 19.991478653 | 10.344377277 |
| O | 10.919655974 | 19.938871391 | 7.408626155  |
| O | 10.887642349 | 19.974591437 | 10.373122258 |
| O | 1.982787469  | 19.934291862 | 1.482440638  |
| O | 6.439509071  | 21.057878625 | 2.890544779  |
| O | 6.451625803  | 21.184159843 | 5.954991776  |
| O | -0.059185805 | 21.113983489 | 2.959579012  |
| O | -0.032604616 | 21.104966949 | 5.918595764  |
| O | -0.037525682 | 21.111790344 | 8.876309130  |
| O | -0.054711423 | 21.120890825 | 0.006376273  |
| O | 6.441669888  | 21.177064984 | 8.944458627  |
| H | 0.000000000  | 0.932897449  | 9.814799089  |
| H | 0.816399334  | 0.932897449  | 8.400899272  |
| H | 6.457698847  | 0.932897449  | 6.856699960  |
| H | 0.834099172  | 0.932897449  | -0.439201108 |
| H | 0.000000000  | 0.932897449  | 3.899999089  |
| H | 0.816399334  | 0.932897449  | 2.486099272  |
| H | 6.457698847  | 0.932897449  | 0.941899960  |
| H | 0.834099172  | 0.932897449  | 5.475598892  |
| H | 6.494400000  | 0.932897449  | 9.814799089  |
| H | 7.310799334  | 0.932897449  | 8.400899272  |
| H | -0.036701153 | 0.932897449  | 6.856699960  |

|   |              |              |              |
|---|--------------|--------------|--------------|
| H | 7.328499172  | 0.932897449  | -0.439201108 |
| H | 6.494400000  | 0.932897449  | 3.899999089  |
| H | 7.310799334  | 0.932897449  | 2.486099272  |
| H | -0.036701153 | 0.932897449  | 0.941899960  |
| H | 7.328499172  | 0.932897449  | 5.475598892  |
| H | 4.515386556  | 21.193937912 | 7.424876713  |
| H | 7.251117876  | 21.717632722 | 8.998592415  |

TS8-6:

|    |             |             |              |
|----|-------------|-------------|--------------|
| Ti | 3.247200000 | 3.247190143 | 1.478700000  |
| Ti | 3.247200000 | 3.247190143 | 4.436100000  |
| Ti | 0.000000000 | 3.247190143 | 2.957400000  |
| Ti | 0.000000000 | 3.247190143 | 0.000000000  |
| Ti | 3.247200000 | 3.247190143 | 7.393500000  |
| Ti | 3.247200000 | 3.247190143 | 10.350900000 |
| Ti | 0.000000000 | 3.247190143 | 8.872200000  |
| Ti | 0.000000000 | 3.247190143 | 5.914800000  |
| Ti | 9.741600000 | 3.247190143 | 1.478700000  |
| Ti | 9.741600000 | 3.247190143 | 4.436100000  |
| Ti | 6.494400000 | 3.247190143 | 2.957400000  |
| Ti | 6.494400000 | 3.247190143 | 0.000000000  |
| Ti | 9.741600000 | 3.247190143 | 7.393500000  |
| Ti | 9.741600000 | 3.247190143 | 10.350900000 |

|    |              |             |              |
|----|--------------|-------------|--------------|
| Ti | 6.494400000  | 3.247190143 | 8.872200000  |
| Ti | 6.494400000  | 3.247190143 | 5.914800000  |
| Ti | 0.000000000  | 6.494389931 | 4.436100000  |
| Ti | 0.000000000  | 6.494389931 | 1.478700000  |
| Ti | 3.247200000  | 6.494389931 | 2.957400000  |
| Ti | 3.247200000  | 6.494389931 | 0.000000000  |
| Ti | 0.000000000  | 6.494389931 | 10.350900000 |
| Ti | 0.000000000  | 6.494389931 | 7.393500000  |
| Ti | 3.247200000  | 6.494389931 | 8.872200000  |
| Ti | 3.247200000  | 6.494389931 | 5.914800000  |
| Ti | 6.494400000  | 6.494389931 | 4.436100000  |
| Ti | 6.494400000  | 6.494389931 | 1.478700000  |
| Ti | 9.741600000  | 6.494389931 | 2.957400000  |
| Ti | 9.741600000  | 6.494389931 | 0.000000000  |
| Ti | 6.494400000  | 6.494389931 | 10.350900000 |
| Ti | 6.494400000  | 6.494389931 | 7.393500000  |
| Ti | 9.741600000  | 6.494389931 | 8.872200000  |
| Ti | 9.741600000  | 6.494389931 | 5.914800000  |
| Ti | 3.232724112  | 9.738534317 | 1.479031939  |
| Ti | 3.232641504  | 9.739028667 | 4.436375275  |
| Ti | -0.006149547 | 9.838293840 | 2.957413013  |
| Ti | -0.007209823 | 9.838008088 | 0.000054061  |

|    |              |              |              |
|----|--------------|--------------|--------------|
| Ti | 3.230670713  | 9.739144397  | 7.393455876  |
| Ti | 3.232033108  | 9.738038895  | 10.350914787 |
| Ti | -0.009369990 | 9.837578746  | 8.873054925  |
| Ti | -0.007222942 | 9.838004873  | 5.915262537  |
| Ti | 9.743452073  | 9.739169400  | 1.481835081  |
| Ti | 9.744674839  | 9.739203690  | 4.439230112  |
| Ti | 6.488060167  | 9.744420804  | 2.971134757  |
| Ti | 6.486734400  | 9.737092342  | 0.012858420  |
| Ti | 9.742231645  | 9.738474309  | 7.396844701  |
| Ti | 9.741067979  | 9.739239052  | 10.354231570 |
| Ti | 6.484508769  | 9.738632187  | 8.882664582  |
| Ti | 6.486943909  | 9.744972305  | 5.924960443  |
| Ti | -0.023534926 | 13.180904364 | 1.508167534  |
| Ti | -0.023529211 | 13.179357733 | 4.466116309  |
| Ti | 3.221204995  | 12.998385408 | 2.965986870  |
| Ti | 3.220664271  | 12.998904047 | 5.923257927  |
| Ti | 6.472698443  | 13.031565120 | 1.505531899  |
| Ti | 6.469851688  | 13.098310666 | 4.446562808  |
| Ti | 9.720305382  | 12.996849849 | 2.967013443  |
| Ti | 9.719422403  | 12.996816630 | 5.924954174  |
| Ti | -0.023349576 | 13.180167125 | 7.424074311  |
| Ti | -0.023250212 | 13.180209273 | 10.381471472 |

|    |              |              |              |
|----|--------------|--------------|--------------|
| Ti | 3.221823262  | 12.998231459 | 8.881318019  |
| Ti | 3.222947313  | 12.996346211 | 0.009916872  |
| Ti | 6.469769988  | 13.046022375 | 7.374403832  |
| Ti | 6.471044839  | 13.022826473 | 10.349350677 |
| Ti | 9.719332651  | 12.996614461 | 8.882181816  |
| Ti | 9.719599181  | 12.997207039 | 0.009988914  |
| Ti | 9.712607700  | 16.329495494 | 1.480133748  |
| Ti | 9.724280604  | 16.308035178 | 4.436497120  |
| Ti | 6.463267925  | 16.347716458 | 2.970721549  |
| Ti | -0.038914834 | 16.639439034 | 5.920731243  |
| Ti | 3.204573746  | 16.323658300 | 1.485274182  |
| Ti | 3.199112865  | 16.330904608 | 4.441198203  |
| Ti | -0.033101177 | 16.639175070 | 2.958380674  |
| Ti | 6.457998628  | 16.372007146 | 5.909518202  |
| Ti | 3.199745809  | 16.328187466 | 7.395336782  |
| Ti | 3.200368492  | 16.316238397 | 10.357734078 |
| Ti | -0.038513221 | 16.643415627 | 8.878048318  |
| Ti | 6.456497772  | 16.279671455 | 0.002406141  |
| Ti | 9.715591746  | 16.318786946 | 7.398599859  |
| Ti | 9.712469109  | 16.320519316 | 10.356286727 |
| Ti | 6.456044463  | 16.284717474 | 8.867933536  |
| Ti | -0.037532566 | 16.647016100 | 0.003883658  |



|    |              |              |              |
|----|--------------|--------------|--------------|
| Ti | 6.565457958  | 19.701393435 | 7.178305854  |
| Ti | 6.447501470  | 19.599244670 | 10.227865062 |
| Ti | 3.161591339  | 19.570970245 | 8.927428735  |
| Ti | 3.229132319  | 19.568242744 | 0.028905982  |
| Ti | 6.453615817  | 19.625568125 | 1.692101252  |
| Ti | 6.457928229  | 20.091796464 | 4.426216606  |
| Ti | 3.223557007  | 19.577848290 | 2.968643917  |
| Ti | 3.221322674  | 19.608553392 | 5.915942148  |
| Ti | -0.042145539 | 20.010745111 | 1.485498116  |
| Ti | -0.037266036 | 19.998171675 | 4.441819612  |
| Ti | 9.682949463  | 19.571044540 | 2.948858792  |
| Ti | 9.738926775  | 19.560717470 | 5.893244813  |
| Ti | -0.034761276 | 20.006165581 | 7.401722045  |
| Ti | -0.063180641 | 20.017091658 | 10.364128095 |
| Ti | 9.707069145  | 19.577710772 | 8.885518710  |
| Ti | 9.666070388  | 19.582103849 | 0.003144544  |
| O  | 0.000000000  | 1.266689833  | 2.957400000  |
| O  | 0.000000000  | 1.266689833  | 0.000000000  |
| O  | 0.000000000  | 1.266689833  | 8.872200000  |
| O  | 0.000000000  | 1.266689833  | 5.914800000  |
| O  | 6.494400000  | 1.266689833  | 2.957400000  |
| O  | 6.494400000  | 1.266689833  | 0.000000000  |

|   |              |             |              |
|---|--------------|-------------|--------------|
| O | 6.494400000  | 1.266689833 | 8.872200000  |
| O | 6.494400000  | 1.266689833 | 5.914800000  |
| O | 9.741600000  | 1.980499953 | 8.872200000  |
| O | 9.741600000  | 1.980499953 | 5.914800000  |
| O | 9.741600000  | 1.980499953 | 2.957400000  |
| O | 9.741600000  | 1.980499953 | 0.000000000  |
| O | 3.247200000  | 1.980499953 | 8.872200000  |
| O | 3.247200000  | 1.980499953 | 5.914800000  |
| O | 3.247200000  | 1.980499953 | 2.957400000  |
| O | 3.247200000  | 1.980499953 | 0.000000000  |
| O | 1.266699988  | 3.247190143 | 1.478700000  |
| O | 1.266699988  | 3.247190143 | 4.436100000  |
| O | 5.227599998  | 3.247190143 | 1.478700000  |
| O | 5.227599998  | 3.247190143 | 4.436100000  |
| O | 1.266699988  | 3.247190143 | 7.393500000  |
| O | 1.266699988  | 3.247190143 | 10.350900000 |
| O | 5.227599998  | 3.247190143 | 7.393500000  |
| O | 5.227599998  | 3.247190143 | 10.350900000 |
| O | 7.761099988  | 3.247190143 | 1.478700000  |
| O | 7.761099988  | 3.247190143 | 4.436100000  |
| O | 11.721999998 | 3.247190143 | 1.478700000  |
| O | 11.721999998 | 3.247190143 | 4.436100000  |

|   |              |             |              |
|---|--------------|-------------|--------------|
| O | 7.761099988  | 3.247190143 | 7.393500000  |
| O | 7.761099988  | 3.247190143 | 10.350900000 |
| O | 11.721999998 | 3.247190143 | 7.393500000  |
| O | 11.721999998 | 3.247190143 | 10.350900000 |
| O | 9.741600000  | 4.513899978 | 8.872200000  |
| O | 9.741600000  | 4.513899978 | 5.914800000  |
| O | 9.741600000  | 4.513899978 | 2.957400000  |
| O | 9.741600000  | 4.513899978 | 0.000000000  |
| O | 3.247200000  | 4.513899978 | 8.872200000  |
| O | 3.247200000  | 4.513899978 | 5.914800000  |
| O | 3.247200000  | 4.513899978 | 2.957400000  |
| O | 3.247200000  | 4.513899978 | 0.000000000  |
| O | 0.000000000  | 5.227600085 | 2.957400000  |
| O | 0.000000000  | 5.227600085 | 0.000000000  |
| O | 0.000000000  | 5.227600085 | 8.872200000  |
| O | 0.000000000  | 5.227600085 | 5.914800000  |
| O | 6.494400000  | 5.227600085 | 0.000000000  |
| O | 6.494400000  | 5.227600085 | 2.957400000  |
| O | 6.494400000  | 5.227600085 | 8.872200000  |
| O | 6.494400000  | 5.227600085 | 5.914800000  |
| O | 8.474900012  | 6.494389931 | 7.393500000  |
| O | 11.008299988 | 6.494389931 | 7.393500000  |

|   |              |             |              |
|---|--------------|-------------|--------------|
| O | 8.474900012  | 6.494389931 | 10.350900000 |
| O | 11.008299988 | 6.494389931 | 10.350900000 |
| O | 8.474900012  | 6.494389931 | 1.478700000  |
| O | 11.008299988 | 6.494389931 | 1.478700000  |
| O | 8.474900012  | 6.494389931 | 4.436100000  |
| O | 11.008299988 | 6.494389931 | 4.436100000  |
| O | 1.980500012  | 6.494389931 | 1.478700000  |
| O | 4.513899988  | 6.494389931 | 1.478700000  |
| O | 1.980500012  | 6.494389931 | 4.436100000  |
| O | 4.513899988  | 6.494389931 | 4.436100000  |
| O | 1.980500012  | 6.494389931 | 7.393500000  |
| O | 4.513899988  | 6.494389931 | 7.393500000  |
| O | 1.980500012  | 6.494389931 | 10.350900000 |
| O | 4.513899988  | 6.494389931 | 10.350900000 |
| O | 0.000000000  | 7.761090122 | 8.872200000  |
| O | 0.000000000  | 7.761090122 | 5.914800000  |
| O | 6.494400000  | 7.761090122 | 2.957400000  |
| O | 6.494400000  | 7.761090122 | 0.000000000  |
| O | 0.000000000  | 7.761090122 | 2.957400000  |
| O | 0.000000000  | 7.761090122 | 0.000000000  |
| O | 6.494400000  | 7.761090122 | 8.872200000  |
| O | 6.494400000  | 7.761090122 | 5.914800000  |

|   |              |             |              |
|---|--------------|-------------|--------------|
| O | 3.247200000  | 8.474889884 | 2.957400000  |
| O | 3.247200000  | 8.474889884 | 0.000000000  |
| O | 3.247200000  | 8.474889884 | 8.872200000  |
| O | 3.247200000  | 8.474889884 | 5.914800000  |
| O | 9.741600000  | 8.474889884 | 2.957400000  |
| O | 9.741600000  | 8.474889884 | 0.000000000  |
| O | 9.741600000  | 8.474889884 | 8.872200000  |
| O | 9.741600000  | 8.474889884 | 5.914800000  |
| O | 1.273414808  | 9.788684828 | 1.479020700  |
| O | 1.273253747  | 9.788911644 | 4.436464707  |
| O | 5.214479492  | 9.777318693 | 1.483642170  |
| O | 5.214133730  | 9.773406037 | 4.440195999  |
| O | 1.272860966  | 9.788890212 | 7.393673067  |
| O | 1.272670160  | 9.787709343 | 10.350836475 |
| O | 5.213910452  | 9.777049729 | 7.396813589  |
| O | 5.213635999  | 9.773960395 | 10.356117563 |
| O | 7.762095450  | 9.783401992 | 1.482963506  |
| O | 7.762368864  | 9.778996413 | 4.440203925  |
| O | 11.704403681 | 9.782974436 | 1.479188089  |
| O | 11.704642805 | 9.782704400 | 4.436087816  |
| O | 7.761345996  | 9.782650465 | 7.397732867  |
| O | 7.761455492  | 9.780773790 | 10.355118435 |

|   |              |              |              |
|---|--------------|--------------|--------------|
| O | 11.703747227 | 9.782904069  | 7.393197281  |
| O | 11.704189626 | 9.782129682  | 10.351358988 |
| O | 9.726295817  | 11.074198203 | 2.960265484  |
| O | 9.727908376  | 11.074118907 | 0.001358984  |
| O | 3.247254033  | 11.075566954 | 2.960057875  |
| O | 3.246412749  | 11.074312146 | 0.001508392  |
| O | 3.246750068  | 11.075150113 | 8.874568523  |
| O | 3.247153110  | 11.076376346 | 5.916057841  |
| O | 9.727008772  | 11.073921381 | 8.875325144  |
| O | 9.725921349  | 11.074041039 | 5.916136627  |
| O | 6.470897806  | 11.789925004 | 8.875975772  |
| O | -0.019576070 | 11.802323417 | 2.956742038  |
| O | 6.471369039  | 11.792588925 | 0.003898208  |
| O | 6.472528939  | 11.797183456 | 5.907849992  |
| O | -0.019021708 | 11.801676903 | -0.001045500 |
| O | -0.019786618 | 11.802131606 | 5.913143501  |
| O | 6.472754554  | 11.797122377 | 2.972501431  |
| O | -0.019912220 | 11.801524026 | 8.871438292  |
| O | 8.439749851  | 13.093269290 | 1.481682242  |
| O | 8.440982748  | 13.106901794 | 4.439907475  |
| O | 10.976344813 | 13.113265844 | 1.482581765  |
| O | 10.976013858 | 13.114926776 | 4.439986852  |

|   |              |              |              |
|---|--------------|--------------|--------------|
| O | 1.967846323  | 13.105351233 | 1.483639449  |
| O | 1.967269101  | 13.104641140 | 4.441131247  |
| O | 4.503839513  | 13.109144588 | 1.483959913  |
| O | 4.502552973  | 13.121643015 | 4.441230852  |
| O | 1.967668506  | 13.104630424 | 7.399173713  |
| O | 1.968265991  | 13.106296000 | 10.356614998 |
| O | 4.502890032  | 13.110690863 | 7.398745836  |
| O | 4.505127223  | 13.112645762 | 10.356328249 |
| O | 8.439948190  | 13.094493380 | 7.399903836  |
| O | 8.438260945  | 13.097274459 | 10.357113497 |
| O | 10.975814220 | 13.112932228 | 7.399584791  |
| O | 10.975497943 | 13.116615926 | 10.356060781 |
| O | -0.020173035 | 14.414987774 | 2.965801619  |
| O | -0.021711429 | 14.414306614 | 5.923231666  |
| O | -0.021124075 | 14.413044662 | 8.880192551  |
| O | -0.022690135 | 14.412907859 | 0.008810923  |
| O | 6.474831464  | 14.416256155 | 2.944075612  |
| O | 6.474160332  | 14.415924326 | 5.929816376  |
| O | 6.474035380  | 14.399375725 | 8.877566735  |
| O | 6.471766496  | 14.409216303 | 0.006595475  |
| O | 9.695723429  | 15.116255535 | 8.877884359  |
| O | 3.217864925  | 15.120895787 | 8.875120137  |

|   |              |              |              |
|---|--------------|--------------|--------------|
| O | 9.707626754  | 15.111755301 | 5.924904371  |
| O | 9.699848931  | 15.114454584 | 2.947163137  |
| O | 3.214470042  | 15.122320974 | 2.964126665  |
| O | 9.693991632  | 15.118892666 | 0.006517400  |
| O | 3.222741700  | 15.116500924 | 0.008334545  |
| O | 3.206678191  | 15.126651899 | 5.923216642  |
| O | 1.253714435  | 16.476803758 | 10.356128801 |
| O | 5.177442838  | 16.414353418 | 4.438278539  |
| O | 5.181666406  | 16.442149210 | 7.397171080  |
| O | 7.733294215  | 16.494704322 | 1.472892731  |
| O | 7.746739831  | 16.426527159 | 4.441515354  |
| O | 5.183502892  | 16.459782238 | 10.356473043 |
| O | 11.664625481 | 16.475968291 | 1.481316471  |
| O | 11.668899446 | 16.465829461 | 4.437572903  |
| O | 1.256964103  | 16.494513940 | 4.446730670  |
| O | 1.254203334  | 16.477941408 | 1.481920845  |
| O | 5.185642018  | 16.483134589 | 1.476283686  |
| O | 7.740116971  | 16.465518348 | 7.395686228  |
| O | 7.732260306  | 16.467089269 | 10.354836536 |
| O | 1.254826407  | 16.487945935 | 7.398792800  |
| O | 11.665578599 | 16.468947727 | 7.404049519  |
| O | 11.664941239 | 16.468366579 | 10.357265626 |



|   |              |              |              |
|---|--------------|--------------|--------------|
| O | 3.239474262  | 17.754787930 | 8.883686068  |
| O | 3.224349973  | 17.744965213 | 0.003938074  |
| O | 9.684708536  | 17.745985704 | 2.963998669  |
| O | 9.696792147  | 17.739697021 | 5.912431004  |
| O | 3.241660537  | 17.753736721 | 2.968807875  |
| O | 3.271716230  | 17.782927338 | 5.936215125  |
| O | 9.687641407  | 17.754588619 | 8.886443666  |
| O | 9.682495764  | 17.758511276 | -0.010919312 |
| O | 6.463143752  | 18.658988755 | -0.036257961 |
| O | 6.431092849  | 18.489138604 | 5.843564160  |
| O | -0.042738997 | 18.523432391 | 0.003022463  |
| O | 6.452971313  | 18.475079973 | 3.072604807  |
| O | -0.054475417 | 18.513338209 | 5.931231433  |
| O | 6.442245812  | 18.480711784 | 8.823126324  |
| O | -0.040840034 | 18.520048376 | 8.887971578  |
| O | -0.037668429 | 18.515059149 | 2.958337023  |
| O | 1.996466754  | 19.915820151 | 4.472639860  |
| O | 4.502219810  | 19.942873345 | 1.466217406  |
| O | 4.453032393  | 20.026375377 | 4.449227071  |
| O | 2.012883428  | 19.943075514 | 7.411408713  |
| O | 1.995138519  | 19.972968724 | 10.383099816 |
| O | 4.500610498  | 20.182509799 | 7.532626506  |

|   |              |              |              |
|---|--------------|--------------|--------------|
| O | 4.503102529  | 19.990371722 | 10.385798976 |
| O | 8.407031064  | 19.946837437 | 1.453758945  |
| O | 8.471823744  | 19.974572149 | 4.447863118  |
| O | 10.897673080 | 19.960499587 | 1.464875101  |
| O | 10.934156151 | 19.930884986 | 4.422015915  |
| O | 8.452851264  | 19.950644722 | 7.407105223  |
| O | 8.362788224  | 20.070724769 | 10.330869530 |
| O | 10.913651512 | 19.963097428 | 7.410016014  |
| O | 10.890770312 | 19.985749330 | 10.360012814 |
| O | 2.005407724  | 19.961850479 | 1.496126065  |
| O | 6.466998308  | 21.075399496 | 2.866064605  |
| O | 6.485835315  | 21.112517583 | 5.975949568  |
| O | -0.029126864 | 21.116259860 | 2.968496520  |
| O | -0.029765134 | 21.113668091 | 5.922414714  |
| O | -0.031491475 | 21.121346241 | 8.880502132  |
| O | -0.041849394 | 21.127858168 | 0.011169982  |
| O | 6.176173880  | 21.241290914 | 8.833538265  |
| H | 0.000000000  | 0.932899949  | 9.814800036  |
| H | 0.816399984  | 0.932899949  | 8.400899982  |
| H | 6.457700016  | 0.932899949  | 6.856699960  |
| H | 0.834099951  | 0.932899949  | -0.439200043 |
| H | 0.000000000  | 0.932899949  | 3.900000036  |

|   |              |              |              |
|---|--------------|--------------|--------------|
| H | 0.816399984  | 0.932899949  | 2.486099982  |
| H | 6.457700016  | 0.932899949  | 0.941899960  |
| H | 0.834099951  | 0.932899949  | 5.475599957  |
| H | 6.494400000  | 0.932899949  | 9.814800036  |
| H | 7.310799984  | 0.932899949  | 8.400899982  |
| H | -0.036699984 | 0.932899949  | 6.856699960  |
| H | 7.328499951  | 0.932899949  | -0.439200043 |
| H | 6.494400000  | 0.932899949  | 3.900000036  |
| H | 7.310799984  | 0.932899949  | 2.486099982  |
| H | -0.036699984 | 0.932899949  | 0.941899960  |
| H | 7.328499951  | 0.932899949  | 5.475599957  |
| H | 5.177083178  | 21.005719993 | 8.181472850  |
| H | 6.706328248  | 22.016892002 | 8.582441401  |

9-Ba:

|    |             |             |              |
|----|-------------|-------------|--------------|
| Ti | 3.247200000 | 3.247194072 | 1.478700000  |
| Ti | 3.247200000 | 3.247194072 | 4.436100000  |
| Ti | 0.000000000 | 3.247194072 | 2.957400000  |
| Ti | 0.000000000 | 3.247194072 | 0.000000000  |
| Ti | 3.247200000 | 3.247194072 | 7.393500000  |
| Ti | 3.247200000 | 3.247194072 | 10.350900000 |
| Ti | 0.000000000 | 3.247194072 | 8.872200000  |
| Ti | 0.000000000 | 3.247194072 | 5.914800000  |

|    |             |             |              |
|----|-------------|-------------|--------------|
| Ti | 9.741600000 | 3.247194072 | 1.478700000  |
| Ti | 9.741600000 | 3.247194072 | 4.436100000  |
| Ti | 6.494400000 | 3.247194072 | 2.957400000  |
| Ti | 6.494400000 | 3.247194072 | 0.000000000  |
| Ti | 9.741600000 | 3.247194072 | 7.393500000  |
| Ti | 9.741600000 | 3.247194072 | 10.350900000 |
| Ti | 6.494400000 | 3.247194072 | 8.872200000  |
| Ti | 6.494400000 | 3.247194072 | 5.914800000  |
| Ti | 0.000000000 | 6.494391717 | 4.436100000  |
| Ti | 0.000000000 | 6.494391717 | 1.478700000  |
| Ti | 3.247200000 | 6.494391717 | 2.957400000  |
| Ti | 3.247200000 | 6.494391717 | 0.000000000  |
| Ti | 0.000000000 | 6.494391717 | 10.350900000 |
| Ti | 0.000000000 | 6.494391717 | 7.393500000  |
| Ti | 3.247200000 | 6.494391717 | 8.872200000  |
| Ti | 3.247200000 | 6.494391717 | 5.914800000  |
| Ti | 6.494400000 | 6.494391717 | 4.436100000  |
| Ti | 6.494400000 | 6.494391717 | 1.478700000  |
| Ti | 9.741600000 | 6.494391717 | 2.957400000  |
| Ti | 9.741600000 | 6.494391717 | 0.000000000  |
| Ti | 6.494400000 | 6.494391717 | 10.350900000 |
| Ti | 6.494400000 | 6.494391717 | 7.393500000  |

|    |              |              |              |
|----|--------------|--------------|--------------|
| Ti | 9.741600000  | 6.494391717  | 8.872200000  |
| Ti | 9.741600000  | 6.494391717  | 5.914800000  |
| Ti | 3.227930466  | 9.737772788  | 1.479335486  |
| Ti | 3.226665616  | 9.739409075  | 4.436637774  |
| Ti | -0.010514174 | 9.837994872  | 2.959815013  |
| Ti | -0.014716570 | 9.840485913  | 0.001925267  |
| Ti | 3.225872261  | 9.737937096  | 7.393383242  |
| Ti | 3.226644964  | 9.738732557  | 10.350977602 |
| Ti | -0.017481236 | 9.840044784  | 8.876632788  |
| Ti | -0.015394196 | 9.837601249  | 5.919988817  |
| Ti | 9.737339674  | 9.739006165  | 1.481285596  |
| Ti | 9.738684274  | 9.738968302  | 4.438303263  |
| Ti | 6.483500838  | 9.748428473  | 2.970629870  |
| Ti | 6.480826314  | 9.738862217  | 0.014211845  |
| Ti | 9.730988930  | 9.738372153  | 7.395381971  |
| Ti | 9.729950345  | 9.738629329  | 10.352464110 |
| Ti | 6.476267765  | 9.740398490  | 8.881389588  |
| Ti | 6.479880860  | 9.748419543  | 5.922509469  |
| Ti | -0.030926333 | 13.183967624 | 1.515370932  |
| Ti | -0.028001904 | 13.177781812 | 4.473487214  |
| Ti | 3.212336372  | 12.996102608 | 2.958737336  |
| Ti | 3.213630576  | 12.997098096 | 5.918265363  |

|    |              |              |              |
|----|--------------|--------------|--------------|
| Ti | 6.466600461  | 13.037070842 | 1.517920684  |
| Ti | 6.463020618  | 13.089954212 | 4.444619560  |
| Ti | 9.717068703  | 12.996635178 | 2.966644123  |
| Ti | 9.717333934  | 12.996019383 | 5.924654293  |
| Ti | -0.029327801 | 13.183627579 | 7.432090048  |
| Ti | -0.029238308 | 13.184077995 | 10.388096994 |
| Ti | 3.215318731  | 12.996783412 | 8.876368869  |
| Ti | 3.214709556  | 12.995785066 | 0.002914340  |
| Ti | 6.465787102  | 13.036193942 | 7.371115439  |
| Ti | 6.464069723  | 13.003038161 | 10.359839274 |
| Ti | 9.715642273  | 12.996949862 | 8.881547987  |
| Ti | 9.714478217  | 12.996550524 | 0.007677765  |
| Ti | 9.706658439  | 16.322148459 | 1.485003521  |
| Ti | 9.704243692  | 16.309719327 | 4.442497684  |
| Ti | 6.443560148  | 16.342210735 | 2.978017218  |
| Ti | -0.050662555 | 16.639813369 | 5.921902847  |
| Ti | 3.184082485  | 16.320264640 | 1.483555696  |
| Ti | 3.182149102  | 16.315088961 | 4.443723467  |
| Ti | -0.049605396 | 16.640922443 | 2.962004080  |
| Ti | 6.448817105  | 16.340323701 | 5.914018418  |
| Ti | 3.188610251  | 16.323513638 | 7.401286479  |
| Ti | 3.199832964  | 16.336338178 | 10.356799895 |

|    |              |              |              |
|----|--------------|--------------|--------------|
| Ti | -0.044869550 | 16.652906158 | 8.880110572  |
| Ti | 6.452607497  | 16.267030867 | 0.032060819  |
| Ti | 9.705319944  | 16.322819975 | 7.401055329  |
| Ti | 9.698725270  | 16.335263037 | 10.357915308 |
| Ti | 6.448655914  | 16.265174195 | 8.865742576  |
| Ti | -0.047832555 | 16.652353229 | 0.000383161  |
| Ti | 6.433279123  | 19.653360345 | 7.157550229  |
| Ti | 6.444576392  | 19.303756957 | 10.366399615 |
| Ti | 3.247541605  | 19.596144978 | 8.887893739  |
| Ti | 3.247875028  | 19.595263433 | 0.016220984  |
| Ti | 6.435474490  | 19.662898382 | 1.745827983  |
| Ti | 6.399546820  | 19.883805235 | 4.448995565  |
| Ti | 3.208100075  | 19.577029611 | 2.961210551  |
| Ti | 3.204832483  | 19.578850922 | 5.937161375  |
| Ti | -0.062311430 | 20.005826251 | 1.484590904  |
| Ti | -0.049214044 | 19.994585490 | 4.445685643  |
| Ti | 9.667012595  | 19.573958137 | 2.972177063  |
| Ti | 9.668273418  | 19.574259962 | 5.920667836  |
| Ti | -0.063066989 | 20.006409899 | 7.406689058  |
| Ti | -0.048205593 | 20.022520228 | 10.361490686 |
| Ti | 9.632863871  | 19.596969371 | 8.883856415  |
| Ti | 9.633198722  | 19.596541101 | 0.015334592  |

|   |             |             |              |
|---|-------------|-------------|--------------|
| O | 0.000000000 | 1.266694833 | 2.957400000  |
| O | 0.000000000 | 1.266694833 | 0.000000000  |
| O | 0.000000000 | 1.266694833 | 8.872200000  |
| O | 0.000000000 | 1.266694833 | 5.914800000  |
| O | 6.494400000 | 1.266694833 | 2.957400000  |
| O | 6.494400000 | 1.266694833 | 0.000000000  |
| O | 6.494400000 | 1.266694833 | 8.872200000  |
| O | 6.494400000 | 1.266694833 | 5.914800000  |
| O | 9.741600000 | 1.980495667 | 8.872200000  |
| O | 9.741600000 | 1.980495667 | 5.914800000  |
| O | 9.741600000 | 1.980495667 | 2.957400000  |
| O | 9.741600000 | 1.980495667 | 0.000000000  |
| O | 3.247200000 | 1.980495667 | 8.872200000  |
| O | 3.247200000 | 1.980495667 | 5.914800000  |
| O | 3.247200000 | 1.980495667 | 2.957400000  |
| O | 3.247200000 | 1.980495667 | 0.000000000  |
| O | 1.266698949 | 3.247194072 | 1.478700000  |
| O | 1.266698949 | 3.247194072 | 4.436100000  |
| O | 5.227599738 | 3.247194072 | 1.478700000  |
| O | 5.227599738 | 3.247194072 | 4.436100000  |
| O | 1.266698949 | 3.247194072 | 7.393500000  |
| O | 1.266698949 | 3.247194072 | 10.350900000 |



|   |              |             |              |
|---|--------------|-------------|--------------|
| O | 5.227599738  | 3.247194072 | 7.393500000  |
| O | 5.227599738  | 3.247194072 | 10.350900000 |
| O | 7.761098949  | 3.247194072 | 1.478700000  |
| O | 7.761098949  | 3.247194072 | 4.436100000  |
| O | 11.721999738 | 3.247194072 | 1.478700000  |
| O | 11.721999738 | 3.247194072 | 4.436100000  |
| O | 7.761098949  | 3.247194072 | 7.393500000  |
| O | 7.761098949  | 3.247194072 | 10.350900000 |
| O | 11.721999738 | 3.247194072 | 7.393500000  |
| O | 11.721999738 | 3.247194072 | 10.350900000 |
| O | 9.741600000  | 4.513896049 | 8.872200000  |
| O | 9.741600000  | 4.513896049 | 5.914800000  |
| O | 9.741600000  | 4.513896049 | 2.957400000  |
| O | 9.741600000  | 4.513896049 | 0.000000000  |
| O | 3.247200000  | 4.513896049 | 8.872200000  |
| O | 3.247200000  | 4.513896049 | 5.914800000  |
| O | 3.247200000  | 4.513896049 | 2.957400000  |
| O | 3.247200000  | 4.513896049 | 0.000000000  |
| O | 0.000000000  | 5.227596870 | 2.957400000  |
| O | 0.000000000  | 5.227596870 | 0.000000000  |
| O | 0.000000000  | 5.227596870 | 8.872200000  |
| O | 0.000000000  | 5.227596870 | 5.914800000  |

|   |              |             |              |
|---|--------------|-------------|--------------|
| O | 6.494400000  | 5.227596870 | 0.000000000  |
| O | 6.494400000  | 5.227596870 | 2.957400000  |
| O | 6.494400000  | 5.227596870 | 8.872200000  |
| O | 6.494400000  | 5.227596870 | 5.914800000  |
| O | 8.474899752  | 6.494391717 | 7.393500000  |
| O | 11.008298949 | 6.494391717 | 7.393500000  |
| O | 8.474899752  | 6.494391717 | 10.350900000 |
| O | 11.008298949 | 6.494391717 | 10.350900000 |
| O | 8.474899752  | 6.494391717 | 1.478700000  |
| O | 11.008298949 | 6.494391717 | 1.478700000  |
| O | 8.474899752  | 6.494391717 | 4.436100000  |
| O | 11.008298949 | 6.494391717 | 4.436100000  |
| O | 1.980499752  | 6.494391717 | 1.478700000  |
| O | 4.513898949  | 6.494391717 | 1.478700000  |
| O | 1.980499752  | 6.494391717 | 4.436100000  |
| O | 4.513898949  | 6.494391717 | 4.436100000  |
| O | 1.980499752  | 6.494391717 | 7.393500000  |
| O | 4.513898949  | 6.494391717 | 7.393500000  |
| O | 1.980499752  | 6.494391717 | 10.350900000 |
| O | 4.513898949  | 6.494391717 | 10.350900000 |
| O | 0.000000000  | 7.761086550 | 8.872200000  |
| O | 0.000000000  | 7.761086550 | 5.914800000  |

|   |             |             |              |
|---|-------------|-------------|--------------|
| O | 6.494400000 | 7.761086550 | 2.957400000  |
| O | 6.494400000 | 7.761086550 | 0.000000000  |
| O | 0.000000000 | 7.761086550 | 2.957400000  |
| O | 0.000000000 | 7.761086550 | 0.000000000  |
| O | 6.494400000 | 7.761086550 | 8.872200000  |
| O | 6.494400000 | 7.761086550 | 5.914800000  |
| O | 3.247200000 | 8.474887384 | 2.957400000  |
| O | 3.247200000 | 8.474887384 | 0.000000000  |
| O | 3.247200000 | 8.474887384 | 8.872200000  |
| O | 3.247200000 | 8.474887384 | 5.914800000  |
| O | 9.741600000 | 8.474887384 | 2.957400000  |
| O | 9.741600000 | 8.474887384 | 0.000000000  |
| O | 9.741600000 | 8.474887384 | 8.872200000  |
| O | 9.741600000 | 8.474887384 | 5.914800000  |
| O | 1.268898862 | 9.788443011 | 1.480275584  |
| O | 1.268774949 | 9.789392421 | 4.438119194  |
| O | 5.209886912 | 9.766870179 | 1.482853018  |
| O | 5.209424770 | 9.765419631 | 4.440408104  |
| O | 1.267712595 | 9.788311922 | 7.394788243  |
| O | 1.268102129 | 9.788174047 | 10.352161982 |
| O | 5.208943925 | 9.766529777 | 7.398892878  |
| O | 5.209078489 | 9.767593131 | 10.356689879 |

|   |              |              |              |
|---|--------------|--------------|--------------|
| O | 7.760321440  | 9.774734783  | 1.482091191  |
| O | 7.760353132  | 9.773019915  | 4.441280773  |
| O | 11.701355599 | 9.783318767  | 1.481104248  |
| O | 11.701192590 | 9.784056006  | 4.437037023  |
| O | 7.758388706  | 9.774847297  | 7.399869885  |
| O | 7.758550936  | 9.776201761  | 10.354778926 |
| O | 11.699825908 | 9.783262688  | 7.394591281  |
| O | 11.699992814 | 9.782725117  | 10.352893997 |
| O | 9.722768188  | 11.073364522 | 2.960004996  |
| O | 9.723782354  | 11.073989604 | 0.002395612  |
| O | 3.243685880  | 11.073420601 | 2.958687179  |
| O | 3.242474804  | 11.073650274 | 0.002113595  |
| O | 3.242952922  | 11.073732070 | 8.873922271  |
| O | 3.243721340  | 11.073628842 | 5.917089737  |
| O | 9.723696758  | 11.074097475 | 8.874606259  |
| O | 9.722538027  | 11.073145565 | 5.917847305  |
| O | 6.463919053  | 11.777868064 | 8.877947766  |
| O | -0.025189959 | 11.804551566 | 2.957088053  |
| O | 6.464874769  | 11.777685540 | 0.008889708  |
| O | 6.464869444  | 11.773164589 | 5.919016306  |
| O | -0.025764584 | 11.803080302 | -0.000021766 |
| O | -0.026225426 | 11.804145084 | 5.914217037  |

|   |              |              |              |
|---|--------------|--------------|--------------|
| O | 6.465377436  | 11.773278176 | 2.967900308  |
| O | -0.026618987 | 11.803111735 | 8.871582731  |
| O | 8.436803212  | 13.094176552 | 1.482986101  |
| O | 8.438746077  | 13.098962180 | 4.443238099  |
| O | 10.971058501 | 13.115362905 | 1.481826445  |
| O | 10.972250353 | 13.112316076 | 4.442144334  |
| O | 1.959008743  | 13.102756964 | 1.480138716  |
| O | 1.958593102  | 13.099255076 | 4.440439689  |
| O | 4.494161169  | 13.112595756 | 1.481172505  |
| O | 4.491532755  | 13.116074069 | 4.440774112  |
| O | 1.959323981  | 13.102555509 | 7.400530213  |
| O | 1.959792098  | 13.102530506 | 10.355055620 |
| O | 4.493978546  | 13.111639201 | 7.401140857  |
| O | 4.495183907  | 13.106293143 | 10.356039606 |
| O | 8.436301584  | 13.094661973 | 7.402359424  |
| O | 8.434885156  | 13.089251263 | 10.357095516 |
| O | 10.971213327 | 13.116314815 | 7.402459384  |
| O | 10.970461406 | 13.117622487 | 10.356957228 |
| O | -0.029620439 | 14.420328118 | 2.967731026  |
| O | -0.030031015 | 14.419732683 | 5.925381341  |
| O | -0.028942553 | 14.418104612 | 8.883517497  |
| O | -0.029533933 | 14.418916147 | 0.010254134  |

|   |              |              |              |
|---|--------------|--------------|--------------|
| O | 6.466417449  | 14.379482400 | 2.957124725  |
| O | 6.464487573  | 14.379222008 | 5.931724727  |
| O | 6.466033760  | 14.384761307 | 8.891413400  |
| O | 6.467375373  | 14.385227082 | -0.002285715 |
| O | 9.688219539  | 15.127059453 | 8.889382494  |
| O | 3.204486071  | 15.127373422 | 8.889168023  |
| O | 9.712850720  | 15.113570539 | 5.930036407  |
| O | 9.712284149  | 15.113375157 | 2.957824801  |
| O | 3.179197138  | 15.117041709 | 2.960625695  |
| O | 9.688883656  | 15.127063739 | -0.000800036 |
| O | 3.203628941  | 15.126085396 | -0.001254056 |
| O | 3.180454843  | 15.116961699 | 5.928795008  |
| O | 1.243286118  | 16.491794654 | 10.359475869 |
| O | 5.158559330  | 16.372745814 | 4.446285877  |
| O | 5.166635247  | 16.408040090 | 7.400084710  |
| O | 7.730548252  | 16.415683593 | 1.494949967  |
| O | 7.735431392  | 16.374477827 | 4.446017582  |
| O | 5.179903955  | 16.485344522 | 10.362267063 |
| O | 11.653631111 | 16.484540131 | 1.480805314  |
| O | 11.653727228 | 16.484475837 | 4.443867079  |
| O | 1.238559233  | 16.495020792 | 4.444642509  |
| O | 1.240070221  | 16.493363432 | 1.481376329  |

|   |              |              |              |
|---|--------------|--------------|--------------|
| O | 5.165954114  | 16.406394517 | 1.492276122  |
| O | 7.729391080  | 16.415291756 | 7.398467367  |
| O | 7.717824294  | 16.494809336 | 10.361152478 |
| O | 1.241022300  | 16.493019815 | 7.406473286  |
| O | 11.653412770 | 16.484489767 | 7.408714167  |
| O | 11.652588760 | 16.483864685 | 10.358519919 |
| O | 3.241577928  | 17.771101857 | 8.884145293  |
| O | 3.242176062  | 17.769938490 | 0.011794348  |
| O | 9.644154386  | 17.749466875 | 2.969833264  |
| O | 9.644896176  | 17.749465446 | 5.921900008  |
| O | 3.243563915  | 17.753347384 | 2.966642348  |
| O | 3.243266472  | 17.754835079 | 5.927119109  |
| O | 9.651543194  | 17.772777435 | 8.881805162  |
| O | 9.652132496  | 17.772291299 | 0.012317808  |
| O | 6.454584262  | 18.461147073 | 0.145156645  |
| O | 6.448308594  | 18.396886853 | 5.821291034  |
| O | -0.055119661 | 18.533488711 | -0.003644227 |
| O | 6.450565398  | 18.398118086 | 3.076658220  |
| O | -0.054398004 | 18.517745574 | 5.938655571  |
| O | 6.455610897  | 18.458597096 | 8.756482498  |
| O | -0.052962092 | 18.533841258 | 8.897316962  |
| O | -0.054444763 | 18.517955601 | 2.956170431  |

|   |              |              |              |
|---|--------------|--------------|--------------|
| O | 1.985983753  | 19.920614352 | 4.448834564  |
| O | 4.529365882  | 20.003364142 | 1.471553147  |
| O | 4.458140628  | 20.022841341 | 4.451925284  |
| O | 2.009012636  | 19.958174282 | 7.426258292  |
| O | 2.050011783  | 20.010622952 | 10.365237357 |
| O | 4.528721768  | 19.999182522 | 7.428434228  |
| O | 4.658061770  | 20.030261958 | 10.364560704 |
| O | 8.358156288  | 20.035806972 | 1.479860365  |
| O | 8.423034175  | 20.057318367 | 4.449770286  |
| O | 10.869880814 | 19.957259162 | 1.477216095  |
| O | 10.900206156 | 19.922451736 | 4.446466278  |
| O | 8.357925737  | 20.030098008 | 7.416944848  |
| O | 8.227965259  | 20.038800936 | 10.365233571 |
| O | 10.867787539 | 19.957538484 | 7.418752056  |
| O | 10.827184031 | 20.011200885 | 10.363474865 |
| O | 2.007742591  | 19.955533935 | 1.474312993  |
| O | 6.446590955  | 21.283962943 | 2.922285843  |
| O | 6.448923354  | 21.276978098 | 5.986845221  |
| O | -0.053020671 | 21.111683902 | 2.967330121  |
| O | -0.053608025 | 21.112637956 | 5.925902080  |
| O | -0.057624941 | 21.128211785 | 8.883019470  |
| O | -0.056659354 | 21.128035691 | 0.011296440  |



|   |              |              |              |
|---|--------------|--------------|--------------|
| H | 0.000000000  | 0.932897449  | 9.814799089  |
| H | 0.816399334  | 0.932897449  | 8.400899272  |
| H | 6.457698847  | 0.932897449  | 6.856699960  |
| H | 0.834099172  | 0.932897449  | -0.439201108 |
| H | 0.000000000  | 0.932897449  | 3.899999089  |
| H | 0.816399334  | 0.932897449  | 2.486099272  |
| H | 6.457698847  | 0.932897449  | 0.941899960  |
| H | 0.834099172  | 0.932897449  | 5.475598892  |
| H | 6.494400000  | 0.932897449  | 9.814799089  |
| H | 7.310799334  | 0.932897449  | 8.400899272  |
| H | -0.036701153 | 0.932897449  | 6.856699960  |
| H | 7.328499172  | 0.932897449  | -0.439201108 |
| H | 6.494400000  | 0.932897449  | 3.899999089  |
| H | 7.310799334  | 0.932897449  | 2.486099272  |
| H | -0.036701153 | 0.932897449  | 0.941899960  |
| H | 7.328499172  | 0.932897449  | 5.475598892  |
| H | 7.220764479  | 21.867523111 | 6.037281667  |
| H | 7.203600430  | 21.892742849 | 2.880376055  |

TS9-B1:

|    |             |             |             |
|----|-------------|-------------|-------------|
| Ti | 3.247200000 | 3.247190143 | 1.478700000 |
| Ti | 3.247200000 | 3.247190143 | 4.436100000 |
| Ti | 0.000000000 | 3.247190143 | 2.957400000 |

|    |             |             |              |
|----|-------------|-------------|--------------|
| Ti | 0.000000000 | 3.247190143 | 0.000000000  |
| Ti | 3.247200000 | 3.247190143 | 7.393500000  |
| Ti | 3.247200000 | 3.247190143 | 10.350900000 |
| Ti | 0.000000000 | 3.247190143 | 8.872200000  |
| Ti | 0.000000000 | 3.247190143 | 5.914800000  |
| Ti | 9.741600000 | 3.247190143 | 1.478700000  |
| Ti | 9.741600000 | 3.247190143 | 4.436100000  |
| Ti | 6.494400000 | 3.247190143 | 2.957400000  |
| Ti | 6.494400000 | 3.247190143 | 0.000000000  |
| Ti | 9.741600000 | 3.247190143 | 7.393500000  |
| Ti | 9.741600000 | 3.247190143 | 10.350900000 |
| Ti | 6.494400000 | 3.247190143 | 8.872200000  |
| Ti | 6.494400000 | 3.247190143 | 5.914800000  |
| Ti | 0.000000000 | 6.494389931 | 4.436100000  |
| Ti | 0.000000000 | 6.494389931 | 1.478700000  |
| Ti | 3.247200000 | 6.494389931 | 2.957400000  |
| Ti | 3.247200000 | 6.494389931 | 0.000000000  |
| Ti | 0.000000000 | 6.494389931 | 10.350900000 |
| Ti | 0.000000000 | 6.494389931 | 7.393500000  |
| Ti | 3.247200000 | 6.494389931 | 8.872200000  |
| Ti | 3.247200000 | 6.494389931 | 5.914800000  |
| Ti | 6.494400000 | 6.494389931 | 4.436100000  |

|    |              |             |              |
|----|--------------|-------------|--------------|
| Ti | 6.494400000  | 6.494389931 | 1.478700000  |
| Ti | 9.741600000  | 6.494389931 | 2.957400000  |
| Ti | 9.741600000  | 6.494389931 | 0.000000000  |
| Ti | 6.494400000  | 6.494389931 | 10.350900000 |
| Ti | 6.494400000  | 6.494389931 | 7.393500000  |
| Ti | 9.741600000  | 6.494389931 | 8.872200000  |
| Ti | 9.741600000  | 6.494389931 | 5.914800000  |
| Ti | 3.226576253  | 9.737880660 | 1.478796056  |
| Ti | 3.224910959  | 9.737859943 | 4.436348540  |
| Ti | -0.014317424 | 9.837225485 | 2.964835968  |
| Ti | -0.014852563 | 9.838412069 | 0.006885537  |
| Ti | 3.226110475  | 9.738034608 | 7.393802483  |
| Ti | 3.226731340  | 9.739061529 | 10.351198697 |
| Ti | -0.016996105 | 9.835592056 | 8.880590380  |
| Ti | -0.016813482 | 9.833674305 | 5.924289350  |
| Ti | 9.735407590  | 9.738556105 | 1.481100462  |
| Ti | 9.735119368  | 9.740588872 | 4.437293488  |
| Ti | 6.480935940  | 9.746924704 | 2.971311136  |
| Ti | 6.480795271  | 9.741036074 | 0.015020161  |
| Ti | 9.729549641  | 9.738731843 | 7.393827917  |
| Ti | 9.731381062  | 9.738359294 | 10.352048891 |
| Ti | 6.477387010  | 9.738723985 | 8.884296357  |

|    |              |              |              |
|----|--------------|--------------|--------------|
| Ti | 6.478522751  | 9.745724904  | 5.923849171  |
| Ti | -0.029140633 | 13.180881504 | 1.516754285  |
| Ti | -0.026835640 | 13.173755212 | 4.477537314  |
| Ti | 3.213515236  | 12.994902808 | 2.962164608  |
| Ti | 3.214695788  | 12.994791007 | 5.922114597  |
| Ti | 6.467386024  | 13.043604200 | 1.520135658  |
| Ti | 6.464906851  | 13.081279145 | 4.441862435  |
| Ti | 9.717334973  | 12.998381479 | 2.967451256  |
| Ti | 9.717323413  | 12.998989058 | 5.925132209  |
| Ti | -0.027307393 | 13.177448196 | 7.436130566  |
| Ti | -0.027903449 | 13.182123096 | 10.390578608 |
| Ti | 3.218304336  | 12.996145471 | 8.880544482  |
| Ti | 3.217821542  | 12.996694471 | 0.006556319  |
| Ti | 6.466130007  | 13.022484642 | 7.378775697  |
| Ti | 6.467315365  | 13.012246513 | 10.368789431 |
| Ti | 9.715913999  | 12.997666385 | 8.881307372  |
| Ti | 9.714916848  | 12.995364654 | 0.009107372  |
| Ti | 9.703376689  | 16.313666988 | 1.486278870  |
| Ti | 9.701675806  | 16.319644916 | 4.446449717  |
| Ti | 6.436918585  | 16.343674141 | 2.979019185  |
| Ti | -0.050997925 | 16.628092902 | 5.927296198  |
| Ti | 3.181676310  | 16.322776398 | 1.486481984  |

|    |              |              |              |
|----|--------------|--------------|--------------|
| Ti | 3.177144388  | 16.311503847 | 4.445559658  |
| Ti | -0.053995740 | 16.627149206 | 2.964554069  |
| Ti | 6.451710620  | 16.311073791 | 5.916995692  |
| Ti | 3.189389319  | 16.316512362 | 7.405771790  |
| Ti | 3.198120001  | 16.332960592 | 10.361254331 |
| Ti | -0.047350151 | 16.645717001 | 8.883259611  |
| Ti | 6.450937397  | 16.280412981 | 0.035291601  |
| Ti | 9.699270280  | 16.333418152 | 7.401548742  |
| Ti | 9.696973081  | 16.330947114 | 10.357982618 |
| Ti | 6.444033070  | 16.262359182 | 8.871823582  |
| Ti | -0.050291465 | 16.648644885 | 0.002601921  |
| Ti | 6.421869112  | 19.620616404 | 7.197767084  |
| Ti | 6.434516956  | 19.336735571 | 10.400735029 |
| Ti | 3.243784855  | 19.589243715 | 8.904624106  |
| Ti | 3.270273694  | 19.599167160 | 0.010438794  |
| Ti | 6.430418730  | 19.731027682 | 1.815148729  |
| Ti | 6.200444362  | 19.844076092 | 4.476742957  |
| Ti | 3.160798632  | 19.578990226 | 2.938702253  |
| Ti | 3.140260352  | 19.570218717 | 5.969668287  |
| Ti | -0.040129937 | 20.004659312 | 1.475994216  |
| Ti | -0.064666429 | 19.983234714 | 4.444177961  |
| Ti | 9.748422627  | 19.562465914 | 2.908679792  |

|    |              |              |              |
|----|--------------|--------------|--------------|
| Ti | 9.666364194  | 19.605963052 | 5.938400880  |
| Ti | -0.073560900 | 20.000139076 | 7.406992487  |
| Ti | -0.054591017 | 20.015912932 | 10.357983091 |
| Ti | 9.616559550  | 19.600351244 | 8.886708295  |
| Ti | 9.620109259  | 19.581637716 | -0.011106575 |
| O  | 0.000000000  | 1.266689833  | 2.957400000  |
| O  | 0.000000000  | 1.266689833  | 0.000000000  |
| O  | 0.000000000  | 1.266689833  | 8.872200000  |
| O  | 0.000000000  | 1.266689833  | 5.914800000  |
| O  | 6.494400000  | 1.266689833  | 2.957400000  |
| O  | 6.494400000  | 1.266689833  | 0.000000000  |
| O  | 6.494400000  | 1.266689833  | 8.872200000  |
| O  | 6.494400000  | 1.266689833  | 5.914800000  |
| O  | 9.741600000  | 1.980499953  | 8.872200000  |
| O  | 9.741600000  | 1.980499953  | 5.914800000  |
| O  | 9.741600000  | 1.980499953  | 2.957400000  |
| O  | 9.741600000  | 1.980499953  | 0.000000000  |
| O  | 3.247200000  | 1.980499953  | 8.872200000  |
| O  | 3.247200000  | 1.980499953  | 5.914800000  |
| O  | 3.247200000  | 1.980499953  | 2.957400000  |
| O  | 3.247200000  | 1.980499953  | 0.000000000  |
| O  | 1.266699988  | 3.247190143  | 1.478700000  |

|   |              |             |              |
|---|--------------|-------------|--------------|
| O | 1.266699988  | 3.247190143 | 4.436100000  |
| O | 5.227599998  | 3.247190143 | 1.478700000  |
| O | 5.227599998  | 3.247190143 | 4.436100000  |
| O | 1.266699988  | 3.247190143 | 7.393500000  |
| O | 1.266699988  | 3.247190143 | 10.350900000 |
| O | 5.227599998  | 3.247190143 | 7.393500000  |
| O | 5.227599998  | 3.247190143 | 10.350900000 |
| O | 7.761099988  | 3.247190143 | 1.478700000  |
| O | 7.761099988  | 3.247190143 | 4.436100000  |
| O | 11.721999998 | 3.247190143 | 1.478700000  |
| O | 11.721999998 | 3.247190143 | 4.436100000  |
| O | 7.761099988  | 3.247190143 | 7.393500000  |
| O | 7.761099988  | 3.247190143 | 10.350900000 |
| O | 11.721999998 | 3.247190143 | 7.393500000  |
| O | 11.721999998 | 3.247190143 | 10.350900000 |
| O | 9.741600000  | 4.513899978 | 8.872200000  |
| O | 9.741600000  | 4.513899978 | 5.914800000  |
| O | 9.741600000  | 4.513899978 | 2.957400000  |
| O | 9.741600000  | 4.513899978 | 0.000000000  |
| O | 3.247200000  | 4.513899978 | 8.872200000  |
| O | 3.247200000  | 4.513899978 | 5.914800000  |
| O | 3.247200000  | 4.513899978 | 2.957400000  |

|   |              |             |              |
|---|--------------|-------------|--------------|
| O | 3.247200000  | 4.513899978 | 0.000000000  |
| O | 0.000000000  | 5.227600085 | 2.957400000  |
| O | 0.000000000  | 5.227600085 | 0.000000000  |
| O | 0.000000000  | 5.227600085 | 8.872200000  |
| O | 0.000000000  | 5.227600085 | 5.914800000  |
| O | 6.494400000  | 5.227600085 | 0.000000000  |
| O | 6.494400000  | 5.227600085 | 2.957400000  |
| O | 6.494400000  | 5.227600085 | 8.872200000  |
| O | 6.494400000  | 5.227600085 | 5.914800000  |
| O | 8.474900012  | 6.494389931 | 7.393500000  |
| O | 11.008299988 | 6.494389931 | 7.393500000  |
| O | 8.474900012  | 6.494389931 | 10.350900000 |
| O | 11.008299988 | 6.494389931 | 10.350900000 |
| O | 8.474900012  | 6.494389931 | 1.478700000  |
| O | 11.008299988 | 6.494389931 | 1.478700000  |
| O | 8.474900012  | 6.494389931 | 4.436100000  |
| O | 11.008299988 | 6.494389931 | 4.436100000  |
| O | 1.980500012  | 6.494389931 | 1.478700000  |
| O | 4.513899988  | 6.494389931 | 1.478700000  |
| O | 1.980500012  | 6.494389931 | 4.436100000  |
| O | 4.513899988  | 6.494389931 | 4.436100000  |
| O | 1.980500012  | 6.494389931 | 7.393500000  |



|   |             |             |              |
|---|-------------|-------------|--------------|
| O | 4.513899988 | 6.494389931 | 7.393500000  |
| O | 1.980500012 | 6.494389931 | 10.350900000 |
| O | 4.513899988 | 6.494389931 | 10.350900000 |
| O | 0.000000000 | 7.761090122 | 8.872200000  |
| O | 0.000000000 | 7.761090122 | 5.914800000  |
| O | 6.494400000 | 7.761090122 | 2.957400000  |
| O | 6.494400000 | 7.761090122 | 0.000000000  |
| O | 0.000000000 | 7.761090122 | 2.957400000  |
| O | 0.000000000 | 7.761090122 | 0.000000000  |
| O | 6.494400000 | 7.761090122 | 8.872200000  |
| O | 6.494400000 | 7.761090122 | 5.914800000  |
| O | 3.247200000 | 8.474889884 | 2.957400000  |
| O | 3.247200000 | 8.474889884 | 0.000000000  |
| O | 3.247200000 | 8.474889884 | 8.872200000  |
| O | 3.247200000 | 8.474889884 | 5.914800000  |
| O | 9.741600000 | 8.474889884 | 2.957400000  |
| O | 9.741600000 | 8.474889884 | 0.000000000  |
| O | 9.741600000 | 8.474889884 | 8.872200000  |
| O | 9.741600000 | 8.474889884 | 5.914800000  |
| O | 1.268179413 | 9.788811630 | 1.482198131  |
| O | 1.267814817 | 9.788829490 | 4.439680347  |
| O | 5.209706627 | 9.768285722 | 1.483681445  |

|   |              |              |              |
|---|--------------|--------------|--------------|
| O | 5.208964707  | 9.765355337  | 4.441539132  |
| O | 1.267671940  | 9.788455512  | 7.396700025  |
| O | 1.267976138  | 9.788684471  | 10.353789498 |
| O | 5.209149018  | 9.768473247  | 7.400809865  |
| O | 5.209256955  | 9.768392164  | 10.357645475 |
| O | 7.759898135  | 9.776388928  | 1.483291068  |
| O | 7.759758635  | 9.773287093  | 4.442114878  |
| O | 11.700669791 | 9.782340424  | 1.482456253  |
| O | 11.700441448 | 9.782537235  | 4.439700102  |
| O | 7.758511061  | 9.776641462  | 7.401125952  |
| O | 7.759081009  | 9.775804923  | 10.356657230 |
| O | 11.699675108 | 9.782051457  | 7.396871318  |
| O | 11.700315326 | 9.780548403  | 10.354509802 |
| O | 9.723550244  | 11.074549677 | 2.960712879  |
| O | 9.724914717  | 11.073986032 | 0.002300857  |
| O | 3.243555862  | 11.072833381 | 2.959844587  |
| O | 3.242583261  | 11.073555618 | 0.002758899  |
| O | 3.243415713  | 11.073258079 | 8.875541389  |
| O | 3.243422208  | 11.072508695 | 5.917699790  |
| O | 9.724899780  | 11.075100107 | 8.876026521  |
| O | 9.723487768  | 11.075277987 | 5.918340954  |
| O | 6.466256388  | 11.777983079 | 8.885211732  |

|   |              |              |              |
|---|--------------|--------------|--------------|
| O | -0.027490925 | 11.802870274 | 2.958414861  |
| O | 6.467059485  | 11.779845466 | 0.009418136  |
| O | 6.466051424  | 11.769561617 | 5.918393004  |
| O | -0.027944364 | 11.802239477 | 0.000622119  |
| O | -0.027266609 | 11.802487010 | 5.915840768  |
| O | 6.466392770  | 11.772443066 | 2.970169225  |
| O | -0.027947871 | 11.802006589 | 8.872920778  |
| O | 8.436868675  | 13.094288353 | 1.484770478  |
| O | 8.438204314  | 13.101873634 | 4.444878864  |
| O | 10.971119808 | 13.117242794 | 1.483134562  |
| O | 10.972124102 | 13.114645668 | 4.443932970  |
| O | 1.959682862  | 13.100767060 | 1.482747971  |
| O | 1.959213057  | 13.097335181 | 4.442158885  |
| O | 4.495085322  | 13.109425339 | 1.484083178  |
| O | 4.492902294  | 13.114116670 | 4.443350598  |
| O | 1.960903809  | 13.100697051 | 7.403602124  |
| O | 1.960982521  | 13.100840998 | 10.357407108 |
| O | 4.495751777  | 13.107407217 | 7.402184937  |
| O | 4.497605019  | 13.107372570 | 10.359679338 |
| O | 8.435790086  | 13.092774940 | 7.402374684  |
| O | 8.435209356  | 13.093024973 | 10.357518779 |
| O | 10.971222809 | 13.118693699 | 7.402834382  |

|   |              |              |              |
|---|--------------|--------------|--------------|
| O | 10.970334115 | 13.120801833 | 10.357343938 |
| O | -0.029956199 | 14.417588473 | 2.969660316  |
| O | -0.028474177 | 14.416852662 | 5.927226048  |
| O | -0.028764217 | 14.416091134 | 8.884229757  |
| O | -0.027670950 | 14.415668935 | 0.012161775  |
| O | 6.462596274  | 14.385313880 | 2.958197907  |
| O | 6.464094792  | 14.377441418 | 5.937588187  |
| O | 6.464034394  | 14.385439610 | 8.889011399  |
| O | 6.469145746  | 14.392300868 | 0.003436617  |
| O | 9.683188068  | 15.129611931 | 8.881666756  |
| O | 3.208156836  | 15.121465861 | 8.894532865  |
| O | 9.705017434  | 15.123201803 | 5.933176456  |
| O | 9.705642456  | 15.113703771 | 2.962957428  |
| O | 3.184733094  | 15.116337331 | 2.962507785  |
| O | 9.681715657  | 15.121574447 | -0.000966123 |
| O | 3.201520339  | 15.124728075 | 0.003558462  |
| O | 3.183694120  | 15.113095834 | 5.929800406  |
| O | 1.242626546  | 16.489604724 | 10.361381026 |
| O | 5.155661399  | 16.382086326 | 4.456006259  |
| O | 5.165597182  | 16.418861510 | 7.401299019  |
| O | 7.726631480  | 16.432973362 | 1.501732468  |
| O | 7.733019502  | 16.375817289 | 4.445864625  |

|   |              |              |              |
|---|--------------|--------------|--------------|
| O | 5.176595318  | 16.476844121 | 10.368527878 |
| O | 11.650240255 | 16.473918022 | 1.480931417  |
| O | 11.650920479 | 16.478714723 | 4.450357507  |
| O | 1.237646121  | 16.487414079 | 4.444344048  |
| O | 1.239422469  | 16.488779259 | 1.482497065  |
| O | 5.163700298  | 16.409840683 | 1.495105171  |
| O | 7.723747187  | 16.425530957 | 7.405247384  |
| O | 7.715059758  | 16.489572577 | 10.364629670 |
| O | 1.240741612  | 16.481512591 | 7.411450472  |
| O | 11.647274003 | 16.485878878 | 7.407015555  |
| O | 11.650125694 | 16.470594729 | 10.358023667 |
| O | 3.240677284  | 17.763391560 | 8.889286556  |
| O | 3.252547229  | 17.773052113 | 0.016278476  |
| O | 9.656021733  | 17.746252167 | 2.967584812  |
| O | 9.618531380  | 17.779922658 | 5.915342860  |
| O | 3.240481803  | 17.757311476 | 2.965539238  |
| O | 3.228598220  | 17.751216390 | 5.933562574  |
| O | 9.643690815  | 17.776309327 | 8.882130949  |
| O | 9.657796392  | 17.758343754 | 0.001327754  |
| O | 6.435502416  | 18.482530594 | 0.153587364  |
| O | 6.463808518  | 18.398619223 | 5.834841959  |
| O | -0.060733810 | 18.526238831 | -0.004416936 |

|   |              |              |              |
|---|--------------|--------------|--------------|
| O | 6.419534765  | 18.409628168 | 3.101116746  |
| O | -0.050587739 | 18.506002246 | 5.944149238  |
| O | 6.449607344  | 18.465063302 | 8.795068997  |
| O | -0.064045175 | 18.524897941 | 8.893041508  |
| O | -0.065025050 | 18.505420742 | 2.949934339  |
| O | 1.951157663  | 19.896194718 | 4.447626407  |
| O | 4.525898522  | 20.057239428 | 1.494589874  |
| O | 4.358821380  | 20.086617570 | 4.468111962  |
| O | 1.981489239  | 19.962787745 | 7.452882344  |
| O | 2.038528775  | 19.994729437 | 10.378063482 |
| O | 4.509342738  | 19.976193433 | 7.434771818  |
| O | 4.647116238  | 20.058959654 | 10.367619602 |
| O | 8.387736981  | 19.950262172 | 1.473243834  |
| O | 8.463612095  | 20.245070510 | 4.367591592  |
| O | 10.894384186 | 19.954315204 | 1.438366861  |
| O | 10.896297566 | 19.885805140 | 4.451871932  |
| O | 8.339972357  | 20.046533380 | 7.412042425  |
| O | 8.228209578  | 20.054476565 | 10.366945315 |
| O | 10.854496750 | 19.958785434 | 7.400834115  |
| O | 10.831329147 | 20.002931585 | 10.342893254 |
| O | 1.993691307  | 19.962574145 | 1.458599972  |
| O | 6.677321400  | 21.145397613 | 3.074496597  |

|   |              |              |              |
|---|--------------|--------------|--------------|
| O | 6.406633120  | 21.220521045 | 5.996530706  |
| O | -0.071171090 | 21.101776530 | 2.965678591  |
| O | -0.067399143 | 21.102755944 | 5.923976812  |
| O | -0.072097582 | 21.122143846 | 8.879575637  |
| O | -0.056662471 | 21.126117582 | 0.004040873  |
| H | 0.000000000  | 0.932899949  | 9.814800036  |
| H | 0.816399984  | 0.932899949  | 8.400899982  |
| H | 6.457700016  | 0.932899949  | 6.856699960  |
| H | 0.834099951  | 0.932899949  | -0.439200043 |
| H | 0.000000000  | 0.932899949  | 3.900000036  |
| H | 0.816399984  | 0.932899949  | 2.486099982  |
| H | 6.457700016  | 0.932899949  | 0.941899960  |
| H | 0.834099951  | 0.932899949  | 5.475599957  |
| H | 6.494400000  | 0.932899949  | 9.814800036  |
| H | 7.310799984  | 0.932899949  | 8.400899982  |
| H | -0.036699984 | 0.932899949  | 6.856699960  |
| H | 7.328499951  | 0.932899949  | -0.439200043 |
| H | 6.494400000  | 0.932899949  | 3.900000036  |
| H | 7.310799984  | 0.932899949  | 2.486099982  |
| H | -0.036699984 | 0.932899949  | 0.941899960  |
| H | 7.328499951  | 0.932899949  | 5.475599957  |
| H | 7.161446708  | 21.835097783 | 6.001484825  |

H 7.815746727 20.943272154 3.735424275

9-Bb:

|    |             |             |              |
|----|-------------|-------------|--------------|
| Ti | 3.247200000 | 3.247194072 | 1.478700000  |
| Ti | 3.247200000 | 3.247194072 | 4.436100000  |
| Ti | 0.000000000 | 3.247194072 | 2.957400000  |
| Ti | 0.000000000 | 3.247194072 | 0.000000000  |
| Ti | 3.247200000 | 3.247194072 | 7.393500000  |
| Ti | 3.247200000 | 3.247194072 | 10.350900000 |
| Ti | 0.000000000 | 3.247194072 | 8.872200000  |
| Ti | 0.000000000 | 3.247194072 | 5.914800000  |
| Ti | 9.741600000 | 3.247194072 | 1.478700000  |
| Ti | 9.741600000 | 3.247194072 | 4.436100000  |
| Ti | 6.494400000 | 3.247194072 | 2.957400000  |
| Ti | 6.494400000 | 3.247194072 | 0.000000000  |
| Ti | 9.741600000 | 3.247194072 | 7.393500000  |
| Ti | 9.741600000 | 3.247194072 | 10.350900000 |
| Ti | 6.494400000 | 3.247194072 | 8.872200000  |
| Ti | 6.494400000 | 3.247194072 | 5.914800000  |
| Ti | 0.000000000 | 6.494391717 | 4.436100000  |
| Ti | 0.000000000 | 6.494391717 | 1.478700000  |
| Ti | 3.247200000 | 6.494391717 | 2.957400000  |
| Ti | 3.247200000 | 6.494391717 | 0.000000000  |



|    |              |             |              |
|----|--------------|-------------|--------------|
| Ti | 0.000000000  | 6.494391717 | 10.350900000 |
| Ti | 0.000000000  | 6.494391717 | 7.393500000  |
| Ti | 3.247200000  | 6.494391717 | 8.872200000  |
| Ti | 3.247200000  | 6.494391717 | 5.914800000  |
| Ti | 6.494400000  | 6.494391717 | 4.436100000  |
| Ti | 6.494400000  | 6.494391717 | 1.478700000  |
| Ti | 9.741600000  | 6.494391717 | 2.957400000  |
| Ti | 9.741600000  | 6.494391717 | 0.000000000  |
| Ti | 6.494400000  | 6.494391717 | 10.350900000 |
| Ti | 6.494400000  | 6.494391717 | 7.393500000  |
| Ti | 9.741600000  | 6.494391717 | 8.872200000  |
| Ti | 9.741600000  | 6.494391717 | 5.914800000  |
| Ti | 3.226631716  | 9.738556820 | 1.479290415  |
| Ti | 3.225906681  | 9.738639688 | 4.436585014  |
| Ti | -0.015247422 | 9.835547050 | 2.964564479  |
| Ti | -0.012536920 | 9.837995229 | 0.005501001  |
| Ti | 3.226359081  | 9.737750285 | 7.393558320  |
| Ti | 3.226687697  | 9.738166411 | 10.351665257 |
| Ti | -0.016537210 | 9.836783284 | 8.878921697  |
| Ti | -0.016170277 | 9.832729895 | 5.923326894  |
| Ti | 9.736580348  | 9.737758858 | 1.481720925  |
| Ti | 9.733771650  | 9.740769610 | 4.437781578  |

|    |              |              |              |
|----|--------------|--------------|--------------|
| Ti | 6.480026334  | 9.744001106  | 2.971148361  |
| Ti | 6.482696702  | 9.737043050  | 0.015356477  |
| Ti | 9.729679529  | 9.738439662  | 7.394296250  |
| Ti | 9.733893096  | 9.739104749  | 10.351871328 |
| Ti | 6.478151011  | 9.735499990  | 8.884315167  |
| Ti | 6.478759536  | 9.743341376  | 5.923850354  |
| Ti | -0.030566283 | 13.181352280 | 1.516931374  |
| Ti | -0.026487281 | 13.171360969 | 4.477000842  |
| Ti | 3.213467957  | 12.996195835 | 2.959698846  |
| Ti | 3.216058443  | 12.995743990 | 5.919625530  |
| Ti | 6.466786071  | 13.035199168 | 1.514574445  |
| Ti | 6.464822294  | 13.083342987 | 4.438203539  |
| Ti | 9.717323803  | 12.997276333 | 2.967563874  |
| Ti | 9.716389259  | 12.997780328 | 5.924425627  |
| Ti | -0.027953716 | 13.179245575 | 7.434612355  |
| Ti | -0.029132320 | 13.182740677 | 10.389723683 |
| Ti | 3.216795817  | 12.995076045 | 8.877802972  |
| Ti | 3.216327441  | 12.996643393 | 0.004448994  |
| Ti | 6.465581360  | 13.017843676 | 7.377119435  |
| Ti | 6.464755272  | 13.011242095 | 10.365728404 |
| Ti | 9.715093106  | 12.996972722 | 8.881054337  |
| Ti | 9.712715507  | 12.994205216 | 0.007604895  |

|    |              |              |              |
|----|--------------|--------------|--------------|
| Ti | 9.704873519  | 16.308590251 | 1.480764620  |
| Ti | 9.705495033  | 16.311401691 | 4.444762106  |
| Ti | 6.439701825  | 16.338023757 | 2.978067494  |
| Ti | -0.051149765 | 16.625511849 | 5.927078060  |
| Ti | 3.183262502  | 16.322781756 | 1.487263329  |
| Ti | 3.175794592  | 16.311062718 | 4.445609224  |
| Ti | -0.054243307 | 16.625522921 | 2.963669925  |
| Ti | 6.451127033  | 16.314360294 | 5.911250529  |
| Ti | 3.193018130  | 16.319676348 | 7.404319707  |
| Ti | 3.197635259  | 16.330718155 | 10.361602831 |
| Ti | -0.044039566 | 16.646666054 | 8.881248343  |
| Ti | 6.451717374  | 16.275023702 | 0.033677215  |
| Ti | 9.701629436  | 16.321891282 | 7.404579603  |
| Ti | 9.698374962  | 16.336193516 | 10.357072567 |
| Ti | 6.447403534  | 16.257655351 | 8.870075167  |
| Ti | -0.048431079 | 16.649177812 | 0.002125424  |
| Ti | 6.437185375  | 19.593472484 | 7.206309356  |
| Ti | 6.437557764  | 19.341279739 | 10.386714824 |
| Ti | 3.251063259  | 19.590811778 | 8.905913769  |
| Ti | 3.256458027  | 19.586943770 | 0.003575378  |
| Ti | 6.450277696  | 19.714797337 | 1.757196820  |
| Ti | 6.262259750  | 19.972564742 | 4.414677186  |

|    |              |              |              |
|----|--------------|--------------|--------------|
| Ti | 3.175665613  | 19.577199277 | 2.943379321  |
| Ti | 3.152266939  | 19.566287844 | 5.957856313  |
| Ti | -0.018217052 | 20.007486826 | 1.478362028  |
| Ti | -0.063726949 | 19.981710586 | 4.448554676  |
| Ti | 9.771591919  | 19.556531207 | 2.866683175  |
| Ti | 9.752808555  | 19.579040590 | 6.014196203  |
| Ti | -0.032995189 | 20.007223934 | 7.422920215  |
| Ti | -0.068529818 | 20.019144428 | 10.363890439 |
| Ti | 9.607126044  | 19.595965668 | 8.914767751  |
| Ti | 9.619901828  | 19.582380671 | -0.024149774 |
| O  | 0.000000000  | 1.266694833  | 2.957400000  |
| O  | 0.000000000  | 1.266694833  | 0.000000000  |
| O  | 0.000000000  | 1.266694833  | 8.872200000  |
| O  | 0.000000000  | 1.266694833  | 5.914800000  |
| O  | 6.494400000  | 1.266694833  | 2.957400000  |
| O  | 6.494400000  | 1.266694833  | 0.000000000  |
| O  | 6.494400000  | 1.266694833  | 8.872200000  |
| O  | 6.494400000  | 1.266694833  | 5.914800000  |
| O  | 9.741600000  | 1.980495667  | 8.872200000  |
| O  | 9.741600000  | 1.980495667  | 5.914800000  |
| O  | 9.741600000  | 1.980495667  | 2.957400000  |
| O  | 9.741600000  | 1.980495667  | 0.000000000  |

|   |              |             |              |
|---|--------------|-------------|--------------|
| O | 3.247200000  | 1.980495667 | 8.872200000  |
| O | 3.247200000  | 1.980495667 | 5.914800000  |
| O | 3.247200000  | 1.980495667 | 2.957400000  |
| O | 3.247200000  | 1.980495667 | 0.000000000  |
| O | 1.266698949  | 3.247194072 | 1.478700000  |
| O | 1.266698949  | 3.247194072 | 4.436100000  |
| O | 5.227599738  | 3.247194072 | 1.478700000  |
| O | 5.227599738  | 3.247194072 | 4.436100000  |
| O | 1.266698949  | 3.247194072 | 7.393500000  |
| O | 1.266698949  | 3.247194072 | 10.350900000 |
| O | 5.227599738  | 3.247194072 | 7.393500000  |
| O | 5.227599738  | 3.247194072 | 10.350900000 |
| O | 7.761098949  | 3.247194072 | 1.478700000  |
| O | 7.761098949  | 3.247194072 | 4.436100000  |
| O | 11.721999738 | 3.247194072 | 1.478700000  |
| O | 11.721999738 | 3.247194072 | 4.436100000  |
| O | 7.761098949  | 3.247194072 | 7.393500000  |
| O | 7.761098949  | 3.247194072 | 10.350900000 |
| O | 11.721999738 | 3.247194072 | 7.393500000  |
| O | 11.721999738 | 3.247194072 | 10.350900000 |
| O | 9.741600000  | 4.513896049 | 8.872200000  |
| O | 9.741600000  | 4.513896049 | 5.914800000  |

|   |              |             |              |
|---|--------------|-------------|--------------|
| O | 9.741600000  | 4.513896049 | 2.957400000  |
| O | 9.741600000  | 4.513896049 | 0.000000000  |
| O | 3.247200000  | 4.513896049 | 8.872200000  |
| O | 3.247200000  | 4.513896049 | 5.914800000  |
| O | 3.247200000  | 4.513896049 | 2.957400000  |
| O | 3.247200000  | 4.513896049 | 0.000000000  |
| O | 0.000000000  | 5.227596870 | 2.957400000  |
| O | 0.000000000  | 5.227596870 | 0.000000000  |
| O | 0.000000000  | 5.227596870 | 8.872200000  |
| O | 0.000000000  | 5.227596870 | 5.914800000  |
| O | 6.494400000  | 5.227596870 | 0.000000000  |
| O | 6.494400000  | 5.227596870 | 2.957400000  |
| O | 6.494400000  | 5.227596870 | 8.872200000  |
| O | 6.494400000  | 5.227596870 | 5.914800000  |
| O | 8.474899752  | 6.494391717 | 7.393500000  |
| O | 11.008298949 | 6.494391717 | 7.393500000  |
| O | 8.474899752  | 6.494391717 | 10.350900000 |
| O | 11.008298949 | 6.494391717 | 10.350900000 |
| O | 8.474899752  | 6.494391717 | 1.478700000  |
| O | 11.008298949 | 6.494391717 | 1.478700000  |
| O | 8.474899752  | 6.494391717 | 4.436100000  |
| O | 11.008298949 | 6.494391717 | 4.436100000  |

|   |             |             |              |
|---|-------------|-------------|--------------|
| O | 1.980499752 | 6.494391717 | 1.478700000  |
| O | 4.513898949 | 6.494391717 | 1.478700000  |
| O | 1.980499752 | 6.494391717 | 4.436100000  |
| O | 4.513898949 | 6.494391717 | 4.436100000  |
| O | 1.980499752 | 6.494391717 | 7.393500000  |
| O | 4.513898949 | 6.494391717 | 7.393500000  |
| O | 1.980499752 | 6.494391717 | 10.350900000 |
| O | 4.513898949 | 6.494391717 | 10.350900000 |
| O | 0.000000000 | 7.761086550 | 8.872200000  |
| O | 0.000000000 | 7.761086550 | 5.914800000  |
| O | 6.494400000 | 7.761086550 | 2.957400000  |
| O | 6.494400000 | 7.761086550 | 0.000000000  |
| O | 0.000000000 | 7.761086550 | 2.957400000  |
| O | 0.000000000 | 7.761086550 | 0.000000000  |
| O | 6.494400000 | 7.761086550 | 8.872200000  |
| O | 6.494400000 | 7.761086550 | 5.914800000  |
| O | 3.247200000 | 8.474887384 | 2.957400000  |
| O | 3.247200000 | 8.474887384 | 0.000000000  |
| O | 3.247200000 | 8.474887384 | 8.872200000  |
| O | 3.247200000 | 8.474887384 | 5.914800000  |
| O | 9.741600000 | 8.474887384 | 2.957400000  |
| O | 9.741600000 | 8.474887384 | 0.000000000  |

|   |              |              |              |
|---|--------------|--------------|--------------|
| O | 9.741600000  | 8.474887384  | 8.872200000  |
| O | 9.741600000  | 8.474887384  | 5.914800000  |
| O | 1.268425810  | 9.788597674  | 1.482134488  |
| O | 1.267482693  | 9.788484802  | 4.439114655  |
| O | 5.209528810  | 9.769591608  | 1.483459640  |
| O | 5.208586473  | 9.765279613  | 4.441250371  |
| O | 1.267647261  | 9.787887223  | 7.395599517  |
| O | 1.267959122  | 9.787803998  | 10.352393250 |
| O | 5.209284491  | 9.769160480  | 7.399681439  |
| O | 5.209463347  | 9.768288579  | 10.357242558 |
| O | 7.759517433  | 9.777597301  | 1.483479986  |
| O | 7.759332862  | 9.773024915  | 4.441510386  |
| O | 11.701054129 | 9.783472001  | 1.481438789  |
| O | 11.700501845 | 9.783596303  | 4.439084135  |
| O | 7.758033203  | 9.777776611  | 7.399908094  |
| O | 7.758792658  | 9.776531090  | 10.356545558 |
| O | 11.699916700 | 9.783406635  | 7.395898688  |
| O | 11.700764089 | 9.782615817  | 10.354079087 |
| O | 9.723333851  | 11.074446807 | 2.960411934  |
| O | 9.723790797  | 11.073510970 | 0.002210006  |
| O | 3.242977731  | 11.073664919 | 2.959799989  |
| O | 3.241445312  | 11.073479180 | 0.001423574  |



|   |              |              |              |
|---|--------------|--------------|--------------|
| O | 3.242897460  | 11.073511684 | 8.874943994  |
| O | 3.243035531  | 11.073388811 | 5.917288475  |
| O | 9.724218258  | 11.074874720 | 8.874888277  |
| O | 9.722858980  | 11.074538605 | 5.917536423  |
| O | 6.464867885  | 11.778030585 | 8.881760919  |
| O | -0.026811351 | 11.803953631 | 2.957448738  |
| O | 6.464883601  | 11.779782244 | 0.007474296  |
| O | 6.464282999  | 11.775369522 | 5.910485863  |
| O | -0.026154378 | 11.803506786 | -0.000746803 |
| O | -0.026243870 | 11.803489284 | 5.915046056  |
| O | 6.466948431  | 11.775883875 | 2.973966172  |
| O | -0.026392982 | 11.803645733 | 8.871739710  |
| O | 8.434645123  | 13.092966393 | 1.484003565  |
| O | 8.435788007  | 13.103738879 | 4.443394250  |
| O | 10.969592715 | 13.117567480 | 1.481614813  |
| O | 10.971358542 | 13.114277405 | 4.442716650  |
| O | 1.959290600  | 13.103379903 | 1.481194626  |
| O | 1.959600513  | 13.101184615 | 4.441323360  |
| O | 4.495788535  | 13.107843346 | 1.483056014  |
| O | 4.494302227  | 13.117866805 | 4.441615669  |
| O | 1.961075911  | 13.103868539 | 7.401971413  |
| O | 1.960785741  | 13.105071911 | 10.355428371 |

|   |              |              |              |
|---|--------------|--------------|--------------|
| O | 4.496862060  | 13.106212775 | 7.400148235  |
| O | 4.498185489  | 13.107515446 | 10.357794173 |
| O | 8.433949962  | 13.090822541 | 7.400916568  |
| O | 8.432195305  | 13.090226034 | 10.356449502 |
| O | 10.970311645 | 13.118558681 | 7.402080245  |
| O | 10.969486986 | 13.117099918 | 10.356503918 |
| O | -0.031576812 | 14.418175336 | 2.968521598  |
| O | -0.029963993 | 14.417560969 | 5.926397740  |
| O | -0.030470686 | 14.417955307 | 8.883402395  |
| O | -0.030398598 | 14.417722419 | 0.010785046  |
| O | 6.462607834  | 14.399691838 | 2.951656966  |
| O | 6.463065299  | 14.393833926 | 5.937414291  |
| O | 6.463353781  | 14.386925520 | 8.882041517  |
| O | 6.465435236  | 14.394860847 | 0.005059638  |
| O | 9.681637205  | 15.123914040 | 8.886269298  |
| O | 3.216536820  | 15.121977357 | 8.888232893  |
| O | 9.701430318  | 15.116171238 | 5.930456357  |
| O | 9.702016372  | 15.111061639 | 2.960706965  |
| O | 3.190659624  | 15.114236341 | 2.960074791  |
| O | 9.680624338  | 15.118303303 | -0.005860739 |
| O | 3.210709655  | 15.123640432 | 0.004910467  |
| O | 3.191532601  | 15.112725428 | 5.930963965  |

|   |              |              |              |
|---|--------------|--------------|--------------|
| O | 1.244346523  | 16.481449368 | 10.359568849 |
| O | 5.157974185  | 16.400772350 | 4.449748756  |
| O | 5.170001164  | 16.443536892 | 7.394443529  |
| O | 7.727890094  | 16.444859208 | 1.502480217  |
| O | 7.737525576  | 16.400751990 | 4.444309742  |
| O | 5.180820445  | 16.486262500 | 10.362641233 |
| O | 11.648804213 | 16.477734237 | 1.478099648  |
| O | 11.650538998 | 16.471953479 | 4.447779127  |
| O | 1.236781716  | 16.483389623 | 4.444126265  |
| O | 1.240849419  | 16.488797118 | 1.483534758  |
| O | 5.167433538  | 16.439171319 | 1.498530077  |
| O | 7.725383386  | 16.438088319 | 7.394308671  |
| O | 7.715147172  | 16.486915085 | 10.360751573 |
| O | 1.243061281  | 16.483667873 | 7.408173081  |
| O | 11.648251150 | 16.483028861 | 7.410201148  |
| O | 11.648672507 | 16.481547595 | 10.356994373 |
| O | 3.240333471  | 17.767123835 | 8.889288804  |
| O | 3.241335557  | 17.763119738 | 0.007999649  |
| O | 9.658492722  | 17.751835757 | 2.966794713  |
| O | 9.646042957  | 17.768345067 | 5.924053113  |
| O | 3.235255629  | 17.756178827 | 2.970672929  |
| O | 3.221729093  | 17.749596535 | 5.926561580  |

|   |              |              |              |
|---|--------------|--------------|--------------|
| O | 9.638071471  | 17.771859457 | 8.881505045  |
| O | 9.648238324  | 17.758395547 | 0.004410785  |
| O | 6.453664266  | 18.480332449 | 0.134142459  |
| O | 6.473599216  | 18.471729534 | 5.798330609  |
| O | -0.043938383 | 18.528259096 | -0.003036185 |
| O | 6.443690296  | 18.482520593 | 3.111301913  |
| O | -0.066807373 | 18.508705101 | 5.938928480  |
| O | 6.472427237  | 18.463554532 | 8.781382978  |
| O | -0.044558338 | 18.529012410 | 8.893097935  |
| O | -0.073340220 | 18.507816056 | 2.961324233  |
| O | 1.955365645  | 19.908283448 | 4.448835156  |
| O | 4.512622280  | 19.993460342 | 1.474724308  |
| O | 4.382881053  | 20.066547435 | 4.476460111  |
| O | 2.002347953  | 19.974508926 | 7.446045900  |
| O | 2.045019278  | 20.001064554 | 10.366673352 |
| O | 4.527027898  | 19.954403073 | 7.418219960  |
| O | 4.655714304  | 20.056375386 | 10.363860037 |
| O | 8.397712119  | 19.996690052 | 1.480219985  |
| O | 8.435847496  | 20.257352122 | 4.458751200  |
| O | 10.916430336 | 19.940742708 | 1.428444310  |
| O | 10.858687456 | 19.936879701 | 4.446012495  |
| O | 8.359456207  | 20.050274585 | 7.407081327  |

|   |              |              |              |
|---|--------------|--------------|--------------|
| O | 8.217694755  | 20.078103952 | 10.369892896 |
| O | 10.895613835 | 19.966196406 | 7.460221073  |
| O | 10.855826024 | 20.001580694 | 10.352664740 |
| O | 1.998858771  | 19.957928535 | 1.465723757  |
| O | 6.455651942  | 21.139714724 | 2.961219541  |
| O | 6.399974671  | 21.245257506 | 6.025410664  |
| O | -0.072859894 | 21.103448535 | 2.971122691  |
| O | -0.075961100 | 21.100391348 | 5.928551319  |
| O | -0.044760054 | 21.132437340 | 8.887517558  |
| O | -0.042110079 | 21.131347911 | 0.010691356  |
| H | 0.000000000  | 0.932897449  | 9.814799089  |
| H | 0.816399334  | 0.932897449  | 8.400899272  |
| H | 6.457698847  | 0.932897449  | 6.856699960  |
| H | 0.834099172  | 0.932897449  | -0.439201108 |
| H | 0.000000000  | 0.932897449  | 3.899999089  |
| H | 0.816399334  | 0.932897449  | 2.486099272  |
| H | 6.457698847  | 0.932897449  | 0.941899960  |
| H | 0.834099172  | 0.932897449  | 5.475598892  |
| H | 6.494400000  | 0.932897449  | 9.814799089  |
| H | 7.310799334  | 0.932897449  | 8.400899272  |
| H | -0.036701153 | 0.932897449  | 6.856699960  |
| H | 7.328499172  | 0.932897449  | -0.439201108 |

|   |              |              |             |
|---|--------------|--------------|-------------|
| H | 6.494400000  | 0.932897449  | 3.899999089 |
| H | 7.310799334  | 0.932897449  | 2.486099272 |
| H | -0.036701153 | 0.932897449  | 0.941899960 |
| H | 7.328499172  | 0.932897449  | 5.475598892 |
| H | 7.163504654  | 21.832385284 | 6.154488161 |
| H | 8.422119633  | 21.217432068 | 4.275231281 |

TS9-B2:

|    |             |             |              |
|----|-------------|-------------|--------------|
| Ti | 3.247200000 | 3.247190143 | 1.478700000  |
| Ti | 3.247200000 | 3.247190143 | 4.436100000  |
| Ti | 0.000000000 | 3.247190143 | 2.957400000  |
| Ti | 0.000000000 | 3.247190143 | 0.000000000  |
| Ti | 3.247200000 | 3.247190143 | 7.393500000  |
| Ti | 3.247200000 | 3.247190143 | 10.350900000 |
| Ti | 0.000000000 | 3.247190143 | 8.872200000  |
| Ti | 0.000000000 | 3.247190143 | 5.914800000  |
| Ti | 9.741600000 | 3.247190143 | 1.478700000  |
| Ti | 9.741600000 | 3.247190143 | 4.436100000  |
| Ti | 6.494400000 | 3.247190143 | 2.957400000  |
| Ti | 6.494400000 | 3.247190143 | 0.000000000  |
| Ti | 9.741600000 | 3.247190143 | 7.393500000  |
| Ti | 9.741600000 | 3.247190143 | 10.350900000 |
| Ti | 6.494400000 | 3.247190143 | 8.872200000  |

|    |              |             |              |
|----|--------------|-------------|--------------|
| Ti | 6.494400000  | 3.247190143 | 5.914800000  |
| Ti | 0.000000000  | 6.494389931 | 4.436100000  |
| Ti | 0.000000000  | 6.494389931 | 1.478700000  |
| Ti | 3.247200000  | 6.494389931 | 2.957400000  |
| Ti | 3.247200000  | 6.494389931 | 0.000000000  |
| Ti | 0.000000000  | 6.494389931 | 10.350900000 |
| Ti | 0.000000000  | 6.494389931 | 7.393500000  |
| Ti | 3.247200000  | 6.494389931 | 8.872200000  |
| Ti | 3.247200000  | 6.494389931 | 5.914800000  |
| Ti | 6.494400000  | 6.494389931 | 4.436100000  |
| Ti | 6.494400000  | 6.494389931 | 1.478700000  |
| Ti | 9.741600000  | 6.494389931 | 2.957400000  |
| Ti | 9.741600000  | 6.494389931 | 0.000000000  |
| Ti | 6.494400000  | 6.494389931 | 10.350900000 |
| Ti | 6.494400000  | 6.494389931 | 7.393500000  |
| Ti | 9.741600000  | 6.494389931 | 8.872200000  |
| Ti | 9.741600000  | 6.494389931 | 5.914800000  |
| Ti | 3.228469501  | 9.739865563 | 1.479088129  |
| Ti | 3.226702764  | 9.739780909 | 4.435749962  |
| Ti | -0.011050222 | 9.838539943 | 2.959294392  |
| Ti | -0.011094124 | 9.840118008 | 0.000506189  |
| Ti | 3.227275570  | 9.738026393 | 7.393481546  |

|    |              |              |              |
|----|--------------|--------------|--------------|
| Ti | 3.229491460  | 9.739246910  | 10.351817385 |
| Ti | -0.012679147 | 9.840114436  | 8.873370539  |
| Ti | -0.014930106 | 9.837465874  | 5.917615208  |
| Ti | 9.741383736  | 9.736550842  | 1.485564835  |
| Ti | 9.737270703  | 9.748748872  | 4.440275731  |
| Ti | 6.483710737  | 9.739398716  | 2.972245320  |
| Ti | 6.485363042  | 9.733852274  | 0.016730722  |
| Ti | 9.733521616  | 9.751678542  | 7.391559118  |
| Ti | 9.739179667  | 9.735444626  | 10.345220846 |
| Ti | 6.482054665  | 9.729734233  | 8.886446151  |
| Ti | 6.479268827  | 9.740455283  | 5.925103227  |
| Ti | -0.032323798 | 13.183767955 | 1.515719669  |
| Ti | -0.029940483 | 13.181698754 | 4.474245373  |
| Ti | 3.210862403  | 12.999268381 | 2.957390891  |
| Ti | 3.211778244  | 12.997013799 | 5.915685800  |
| Ti | 6.464742803  | 13.035520996 | 1.508041785  |
| Ti | 6.463118164  | 13.077131101 | 4.432473636  |
| Ti | 9.715355350  | 13.015150822 | 2.964439795  |
| Ti | 9.713438074  | 13.017919400 | 5.920711488  |
| Ti | -0.030579532 | 13.184731652 | 7.431225304  |
| Ti | -0.032420954 | 13.186625830 | 10.387131226 |
| Ti | 3.211980479  | 12.996597673 | 8.873310208  |



|    |              |              |              |
|----|--------------|--------------|--------------|
| Ti | 3.212513150  | 12.998916549 | 0.001302676  |
| Ti | 6.460631718  | 13.011783238 | 7.378907005  |
| Ti | 6.461778889  | 13.003736824 | 10.363129559 |
| Ti | 9.710703022  | 13.016399558 | 8.875296516  |
| Ti | 9.711647567  | 12.986573143 | 0.004617921  |
| Ti | 9.698170259  | 16.309529302 | 1.503304740  |
| Ti | 9.710023708  | 16.374271729 | 4.472988123  |
| Ti | 6.441877189  | 16.340166181 | 2.972741335  |
| Ti | -0.047495755 | 16.651466327 | 5.921555175  |
| Ti | 3.193071774  | 16.325062055 | 1.480190411  |
| Ti | 3.177976580  | 16.316401633 | 4.437266635  |
| Ti | -0.050227040 | 16.646401733 | 2.957048188  |
| Ti | 6.450385893  | 16.302603750 | 5.902194733  |
| Ti | 3.195753571  | 16.329585506 | 7.392203476  |
| Ti | 3.189921990  | 16.328284264 | 10.352501373 |
| Ti | -0.043203087 | 16.660018878 | 8.876680106  |
| Ti | 6.449197417  | 16.262339180 | 0.011439696  |
| Ti | 9.700210799  | 16.377646815 | 7.361948801  |
| Ti | 9.707364251  | 16.309364281 | 10.345688470 |
| Ti | 6.450620470  | 16.245835942 | 8.862446258  |
| Ti | -0.048680464 | 16.653217271 | 0.002757125  |
| Ti | 6.471450479  | 19.571045969 | 7.186207672  |

|    |              |              |              |
|----|--------------|--------------|--------------|
| Ti | 6.448381201  | 19.369497014 | 10.358060812 |
| Ti | 3.287037559  | 19.601145991 | 8.879263336  |
| Ti | 3.220664531  | 19.585083168 | 0.003112013  |
| Ti | 6.435374866  | 19.653523937 | 1.693447342  |
| Ti | 6.431357560  | 20.053812907 | 4.366972549  |
| Ti | 3.207512592  | 19.576827085 | 2.958570894  |
| Ti | 3.215015962  | 19.578375145 | 5.910076086  |
| Ti | -0.057215274 | 20.010628667 | 1.490503575  |
| Ti | -0.068803752 | 20.010693318 | 4.448875850  |
| Ti | 9.674263203  | 19.585445359 | 2.945905533  |
| Ti | 9.841731309  | 19.671237334 | 6.056844395  |
| Ti | 0.025622486  | 20.024336895 | 7.432440086  |
| Ti | -0.047486663 | 20.029270042 | 10.369756856 |
| Ti | 9.631402112  | 19.593600715 | 8.951380600  |
| Ti | 9.651777123  | 19.578846278 | 0.021748010  |
| O  | 0.000000000  | 1.266689833  | 2.957400000  |
| O  | 0.000000000  | 1.266689833  | 0.000000000  |
| O  | 0.000000000  | 1.266689833  | 8.872200000  |
| O  | 0.000000000  | 1.266689833  | 5.914800000  |
| O  | 6.494400000  | 1.266689833  | 2.957400000  |
| O  | 6.494400000  | 1.266689833  | 0.000000000  |
| O  | 6.494400000  | 1.266689833  | 8.872200000  |

|   |              |             |              |
|---|--------------|-------------|--------------|
| O | 6.494400000  | 1.266689833 | 5.914800000  |
| O | 9.741600000  | 1.980499953 | 8.872200000  |
| O | 9.741600000  | 1.980499953 | 5.914800000  |
| O | 9.741600000  | 1.980499953 | 2.957400000  |
| O | 9.741600000  | 1.980499953 | 0.000000000  |
| O | 3.247200000  | 1.980499953 | 8.872200000  |
| O | 3.247200000  | 1.980499953 | 5.914800000  |
| O | 3.247200000  | 1.980499953 | 2.957400000  |
| O | 3.247200000  | 1.980499953 | 0.000000000  |
| O | 1.266699988  | 3.247190143 | 1.478700000  |
| O | 1.266699988  | 3.247190143 | 4.436100000  |
| O | 5.227599998  | 3.247190143 | 1.478700000  |
| O | 5.227599998  | 3.247190143 | 4.436100000  |
| O | 1.266699988  | 3.247190143 | 7.393500000  |
| O | 1.266699988  | 3.247190143 | 10.350900000 |
| O | 5.227599998  | 3.247190143 | 7.393500000  |
| O | 5.227599998  | 3.247190143 | 10.350900000 |
| O | 7.761099988  | 3.247190143 | 1.478700000  |
| O | 7.761099988  | 3.247190143 | 4.436100000  |
| O | 11.721999998 | 3.247190143 | 1.478700000  |
| O | 11.721999998 | 3.247190143 | 4.436100000  |
| O | 7.761099988  | 3.247190143 | 7.393500000  |

|   |              |             |              |
|---|--------------|-------------|--------------|
| O | 7.761099988  | 3.247190143 | 10.350900000 |
| O | 11.721999998 | 3.247190143 | 7.393500000  |
| O | 11.721999998 | 3.247190143 | 10.350900000 |
| O | 9.741600000  | 4.513899978 | 8.872200000  |
| O | 9.741600000  | 4.513899978 | 5.914800000  |
| O | 9.741600000  | 4.513899978 | 2.957400000  |
| O | 9.741600000  | 4.513899978 | 0.000000000  |
| O | 3.247200000  | 4.513899978 | 8.872200000  |
| O | 3.247200000  | 4.513899978 | 5.914800000  |
| O | 3.247200000  | 4.513899978 | 2.957400000  |
| O | 3.247200000  | 4.513899978 | 0.000000000  |
| O | 0.000000000  | 5.227600085 | 2.957400000  |
| O | 0.000000000  | 5.227600085 | 0.000000000  |
| O | 0.000000000  | 5.227600085 | 8.872200000  |
| O | 0.000000000  | 5.227600085 | 5.914800000  |
| O | 6.494400000  | 5.227600085 | 0.000000000  |
| O | 6.494400000  | 5.227600085 | 2.957400000  |
| O | 6.494400000  | 5.227600085 | 8.872200000  |
| O | 6.494400000  | 5.227600085 | 5.914800000  |
| O | 8.474900012  | 6.494389931 | 7.393500000  |
| O | 11.008299988 | 6.494389931 | 7.393500000  |
| O | 8.474900012  | 6.494389931 | 10.350900000 |

|   |              |             |              |
|---|--------------|-------------|--------------|
| O | 11.008299988 | 6.494389931 | 10.350900000 |
| O | 8.474900012  | 6.494389931 | 1.478700000  |
| O | 11.008299988 | 6.494389931 | 1.478700000  |
| O | 8.474900012  | 6.494389931 | 4.436100000  |
| O | 11.008299988 | 6.494389931 | 4.436100000  |
| O | 1.980500012  | 6.494389931 | 1.478700000  |
| O | 4.513899988  | 6.494389931 | 1.478700000  |
| O | 1.980500012  | 6.494389931 | 4.436100000  |
| O | 4.513899988  | 6.494389931 | 4.436100000  |
| O | 1.980500012  | 6.494389931 | 7.393500000  |
| O | 4.513899988  | 6.494389931 | 7.393500000  |
| O | 1.980500012  | 6.494389931 | 10.350900000 |
| O | 4.513899988  | 6.494389931 | 10.350900000 |
| O | 0.000000000  | 7.761090122 | 8.872200000  |
| O | 0.000000000  | 7.761090122 | 5.914800000  |
| O | 6.494400000  | 7.761090122 | 2.957400000  |
| O | 6.494400000  | 7.761090122 | 0.000000000  |
| O | 0.000000000  | 7.761090122 | 2.957400000  |
| O | 0.000000000  | 7.761090122 | 0.000000000  |
| O | 6.494400000  | 7.761090122 | 8.872200000  |
| O | 6.494400000  | 7.761090122 | 5.914800000  |
| O | 3.247200000  | 8.474889884 | 2.957400000  |

|   |              |             |              |
|---|--------------|-------------|--------------|
| O | 3.247200000  | 8.474889884 | 0.000000000  |
| O | 3.247200000  | 8.474889884 | 8.872200000  |
| O | 3.247200000  | 8.474889884 | 5.914800000  |
| O | 9.741600000  | 8.474889884 | 2.957400000  |
| O | 9.741600000  | 8.474889884 | 0.000000000  |
| O | 9.741600000  | 8.474889884 | 8.872200000  |
| O | 9.741600000  | 8.474889884 | 5.914800000  |
| O | 1.269565577  | 9.790127160 | 1.478954691  |
| O | 1.268649997  | 9.789450286 | 4.436650786  |
| O | 5.211312043  | 9.771914770 | 1.484346268  |
| O | 5.210070703  | 9.767998541 | 4.439871276  |
| O | 1.268615057  | 9.789193466 | 7.392916328  |
| O | 1.269088629  | 9.788598031 | 10.350529497 |
| O | 5.210235271  | 9.771680810 | 7.398807113  |
| O | 5.210830548  | 9.769661617 | 10.356271466 |
| O | 7.760677722  | 9.778066649 | 1.483489568  |
| O | 7.759574324  | 9.775658475 | 4.441221270  |
| O | 11.702093493 | 9.783373774 | 1.478963918  |
| O | 11.701393786 | 9.785027919 | 4.435460610  |
| O | 7.758541974  | 9.780399455 | 7.397873048  |
| O | 7.760190772  | 9.777093307 | 10.356146191 |
| O | 11.700444175 | 9.785539058 | 7.393431270  |

|   |              |              |              |
|---|--------------|--------------|--------------|
| O | 11.701877230 | 9.782682969  | 10.351228745 |
| O | 9.721839359  | 11.080813357 | 2.957594715  |
| O | 9.724881856  | 11.074768635 | 0.000972038  |
| O | 3.242530916  | 11.074938657 | 2.958936192  |
| O | 3.241499346  | 11.074543605 | -0.000132728 |
| O | 3.241698074  | 11.074739345 | 8.873230476  |
| O | 3.242541957  | 11.074348222 | 5.915445305  |
| O | 9.723097584  | 11.080788711 | 8.876143161  |
| O | 9.721546202  | 11.081477730 | 5.915190140  |
| O | 6.466089092  | 11.775788505 | 8.877177659  |
| O | -0.026784204 | 11.804675511 | 2.954369256  |
| O | 6.466072336  | 11.777323707 | 0.006592754  |
| O | 6.465910496  | 11.780337317 | 5.905636792  |
| O | -0.027673678 | 11.803957203 | -0.003573959 |
| O | -0.026479747 | 11.804425836 | 5.911207114  |
| O | 6.468844666  | 11.782131481 | 2.971418786  |
| O | -0.027678613 | 11.803668951 | 8.869525209  |
| O | 8.433352348  | 13.097964549 | 1.480887885  |
| O | 8.433705643  | 13.110430471 | 4.440478017  |
| O | 10.968501396 | 13.122993192 | 1.479843686  |
| O | 10.969781962 | 13.118795141 | 4.440154359  |
| O | 1.958932629  | 13.103397763 | 1.478208125  |

|   |              |              |              |
|---|--------------|--------------|--------------|
| O | 1.959023421  | 13.102840547 | 4.438070456  |
| O | 4.494776578  | 13.105967743 | 1.478737263  |
| O | 4.494746704  | 13.118236496 | 4.438932598  |
| O | 1.959716113  | 13.103752452 | 7.397069937  |
| O | 1.959844832  | 13.106071328 | 10.350791168 |
| O | 4.496286526  | 13.105122632 | 7.395782166  |
| O | 4.497615410  | 13.107701899 | 10.352331618 |
| O | 8.431449878  | 13.095392069 | 7.397413113  |
| O | 8.430900582  | 13.097109437 | 10.354751836 |
| O | 10.968596084 | 13.120080667 | 7.398203094  |
| O | 10.967168615 | 13.126616525 | 10.354051287 |
| O | -0.028147249 | 14.419666960 | 2.965888093  |
| O | -0.029983606 | 14.420170240 | 5.924115692  |
| O | -0.028254017 | 14.418600749 | 8.879799808  |
| O | -0.029388459 | 14.419007945 | 0.008620348  |
| O | 6.457553112  | 14.398892447 | 2.946234041  |
| O | 6.463989972  | 14.394488298 | 5.933981933  |
| O | 6.463957110  | 14.379614560 | 8.873734536  |
| O | 6.467267176  | 14.385354956 | -0.000257767 |
| O | 9.686387469  | 15.137577262 | 8.870387942  |
| O | 3.211617442  | 15.127852771 | 8.872999208  |
| O | 9.705275262  | 15.126203983 | 5.929008414  |



|   |              |              |              |
|---|--------------|--------------|--------------|
| O | 9.703525541  | 15.128660377 | 2.965915064  |
| O | 3.190745220  | 15.115137531 | 2.953290042  |
| O | 9.686461895  | 15.129404046 | 0.004548481  |
| O | 3.206194748  | 15.122023792 | -0.004100021 |
| O | 3.191770296  | 15.117152795 | 5.926269744  |
| O | 1.246087282  | 16.482673457 | 10.355615397 |
| O | 5.159652468  | 16.399421458 | 4.443740739  |
| O | 5.173270965  | 16.446636227 | 7.384720899  |
| O | 7.722670545  | 16.452214102 | 1.487892191  |
| O | 7.724860067  | 16.397101511 | 4.428976570  |
| O | 5.179755364  | 16.459777952 | 10.349754540 |
| O | 11.654989350 | 16.486803285 | 1.478765418  |
| O | 11.662703268 | 16.484162224 | 4.442907580  |
| O | 1.240650560  | 16.498700918 | 4.442649813  |
| O | 1.243074790  | 16.492838363 | 1.479811036  |
| O | 5.166403656  | 16.425734555 | 1.478223740  |
| O | 7.720442966  | 16.450357787 | 7.390254431  |
| O | 7.718348002  | 16.469189187 | 10.350714512 |
| O | 1.246558646  | 16.494961141 | 7.400707539  |
| O | 11.658561010 | 16.497303592 | 7.407945006  |
| O | 11.657327594 | 16.483513210 | 10.352993366 |
| O | 3.253040284  | 17.777488053 | 8.881991005  |

|   |              |              |              |
|---|--------------|--------------|--------------|
| O | 3.235178866  | 17.760220786 | -0.009896407 |
| O | 9.653376174  | 17.761137335 | 2.972948353  |
| O | 9.643791089  | 17.770608936 | 5.907211903  |
| O | 3.240475179  | 17.753051988 | 2.962927617  |
| O | 3.236143024  | 17.754237501 | 5.914629535  |
| O | 9.652912344  | 17.775114170 | 8.902826243  |
| O | 9.660874998  | 17.760325086 | 0.002843718  |
| O | 6.433662553  | 18.458461364 | 0.075002621  |
| O | 6.471679991  | 18.487590544 | 5.775386508  |
| O | -0.043623145 | 18.533018650 | -0.005218037 |
| O | 6.406038233  | 18.471118025 | 3.055900229  |
| O | -0.068441494 | 18.530529394 | 5.941688917  |
| O | 6.462562763  | 18.457679832 | 8.786682757  |
| O | -0.016117023 | 18.539279829 | 8.898807255  |
| O | -0.067579038 | 18.524147485 | 2.959824240  |
| O | 1.976866005  | 19.910408012 | 4.440689885  |
| O | 4.494462379  | 19.954831700 | 1.435762337  |
| O | 4.437830821  | 20.029393630 | 4.457140600  |
| O | 2.049910860  | 19.994312954 | 7.425659122  |
| O | 2.066289737  | 20.010556157 | 10.340056989 |
| O | 4.570447378  | 19.971690342 | 7.396334136  |
| O | 4.663040247  | 20.069258148 | 10.352686743 |

|   |              |              |              |
|---|--------------|--------------|--------------|
| O | 8.361405566  | 19.971259571 | 1.431964681  |
| O | 8.404755296  | 20.154099641 | 4.335886963  |
| O | 10.882043137 | 19.973914919 | 1.467486959  |
| O | 10.889234386 | 19.994351888 | 4.438751013  |
| O | 8.388443312  | 19.962006571 | 7.445381077  |
| O | 8.240964060  | 20.077048814 | 10.375291571 |
| O | 10.939759130 | 19.980642588 | 7.548140672  |
| O | 10.864957929 | 20.014708845 | 10.381061576 |
| O | 2.001249750  | 19.936970070 | 1.469093064  |
| O | 6.376780701  | 21.101904761 | 2.855469187  |
| O | 6.555855338  | 21.217333840 | 6.009271186  |
| O | -0.033221843 | 21.121009412 | 2.965529774  |
| O | -0.045943983 | 21.115664781 | 5.938363617  |
| O | -0.004160572 | 21.145987690 | 8.899374011  |
| O | -0.027822399 | 21.132754167 | 0.017667508  |
| H | 0.000000000  | 0.932899949  | 9.814800036  |
| H | 0.816399984  | 0.932899949  | 8.400899982  |
| H | 6.457700016  | 0.932899949  | 6.856699960  |
| H | 0.834099951  | 0.932899949  | -0.439200043 |
| H | 0.000000000  | 0.932899949  | 3.900000036  |
| H | 0.816399984  | 0.932899949  | 2.486099982  |
| H | 6.457700016  | 0.932899949  | 0.941899960  |

|   |              |              |              |
|---|--------------|--------------|--------------|
| H | 0.834099951  | 0.932899949  | 5.475599957  |
| H | 6.494400000  | 0.932899949  | 9.814800036  |
| H | 7.310799984  | 0.932899949  | 8.400899982  |
| H | -0.036699984 | 0.932899949  | 6.856699960  |
| H | 7.328499951  | 0.932899949  | -0.439200043 |
| H | 6.494400000  | 0.932899949  | 3.900000036  |
| H | 7.310799984  | 0.932899949  | 2.486099982  |
| H | -0.036699984 | 0.932899949  | 0.941899960  |
| H | 7.328499951  | 0.932899949  | 5.475599957  |
| H | 7.453976695  | 21.630953845 | 6.080786323  |
| H | 8.927780761  | 20.996313759 | 5.176597353  |

9-Bc:

|    |             |             |              |
|----|-------------|-------------|--------------|
| Ti | 3.247200000 | 3.247194072 | 1.478700000  |
| Ti | 3.247200000 | 3.247194072 | 4.436100000  |
| Ti | 0.000000000 | 3.247194072 | 2.957400000  |
| Ti | 0.000000000 | 3.247194072 | 0.000000000  |
| Ti | 3.247200000 | 3.247194072 | 7.393500000  |
| Ti | 3.247200000 | 3.247194072 | 10.350900000 |
| Ti | 0.000000000 | 3.247194072 | 8.872200000  |
| Ti | 0.000000000 | 3.247194072 | 5.914800000  |
| Ti | 9.741600000 | 3.247194072 | 1.478700000  |
| Ti | 9.741600000 | 3.247194072 | 4.436100000  |

|    |             |             |              |
|----|-------------|-------------|--------------|
| Ti | 6.494400000 | 3.247194072 | 2.957400000  |
| Ti | 6.494400000 | 3.247194072 | 0.000000000  |
| Ti | 9.741600000 | 3.247194072 | 7.393500000  |
| Ti | 9.741600000 | 3.247194072 | 10.350900000 |
| Ti | 6.494400000 | 3.247194072 | 8.872200000  |
| Ti | 6.494400000 | 3.247194072 | 5.914800000  |
| Ti | 0.000000000 | 6.494391717 | 4.436100000  |
| Ti | 0.000000000 | 6.494391717 | 1.478700000  |
| Ti | 3.247200000 | 6.494391717 | 2.957400000  |
| Ti | 3.247200000 | 6.494391717 | 0.000000000  |
| Ti | 0.000000000 | 6.494391717 | 10.350900000 |
| Ti | 0.000000000 | 6.494391717 | 7.393500000  |
| Ti | 3.247200000 | 6.494391717 | 8.872200000  |
| Ti | 3.247200000 | 6.494391717 | 5.914800000  |
| Ti | 6.494400000 | 6.494391717 | 4.436100000  |
| Ti | 6.494400000 | 6.494391717 | 1.478700000  |
| Ti | 9.741600000 | 6.494391717 | 2.957400000  |
| Ti | 9.741600000 | 6.494391717 | 0.000000000  |
| Ti | 6.494400000 | 6.494391717 | 10.350900000 |
| Ti | 6.494400000 | 6.494391717 | 7.393500000  |
| Ti | 9.741600000 | 6.494391717 | 8.872200000  |
| Ti | 9.741600000 | 6.494391717 | 5.914800000  |

|    |              |              |              |
|----|--------------|--------------|--------------|
| Ti | 3.230915682  | 9.739416218  | 1.479002128  |
| Ti | 3.230766570  | 9.739239409  | 4.436388051  |
| Ti | -0.008069812 | 9.839454349  | 2.957316601  |
| Ti | -0.012241035 | 9.839833684  | -0.000585565 |
| Ti | 3.227151138  | 9.739829487  | 7.393712460  |
| Ti | 3.226938381  | 9.740124526  | 10.350772240 |
| Ti | -0.014072066 | 9.840962404  | 8.871764434  |
| Ti | -0.011960866 | 9.840095862  | 5.914704772  |
| Ti | 9.740990436  | 9.736256161  | 1.472091276  |
| Ti | 9.741139417  | 9.735533566  | 4.445106466  |
| Ti | 6.488929767  | 9.732499953  | 2.970550730  |
| Ti | 6.480955553  | 9.740832118  | 0.012027864  |
| Ti | 9.735411616  | 9.754916467  | 7.398016896  |
| Ti | 9.735888045  | 9.752918705  | 10.348409987 |
| Ti | 6.482627341  | 9.738253923  | 8.887291612  |
| Ti | 6.481161166  | 9.731806648  | 5.929291378  |
| Ti | -0.031722157 | 13.184765228 | 1.514962101  |
| Ti | -0.031989986 | 13.184761299 | 4.472917264  |
| Ti | 3.212429242  | 12.999229090 | 2.959296285  |
| Ti | 3.213184801  | 12.999506626 | 5.915742937  |
| Ti | 6.466329255  | 13.025061409 | 1.463212924  |
| Ti | 6.462819421  | 13.004869116 | 4.440673797  |

|    |              |              |              |
|----|--------------|--------------|--------------|
| Ti | 9.713999709  | 12.984694325 | 2.962948674  |
| Ti | 9.710655353  | 13.024600991 | 5.922373192  |
| Ti | -0.030541864 | 13.187159114 | 7.428997909  |
| Ti | -0.028438718 | 13.184860241 | 10.387408157 |
| Ti | 3.211726548  | 12.999513413 | 8.872971408  |
| Ti | 3.214055180  | 12.998798676 | 0.002602394  |
| Ti | 6.461970733  | 13.024281307 | 7.418858167  |
| Ti | 6.463464835  | 13.073163437 | 10.354250261 |
| Ti | 9.715935430  | 13.027176329 | 8.876437008  |
| Ti | 9.715023097  | 13.023416907 | 0.001713281  |
| Ti | 9.710747833  | 16.289626690 | 1.456944064  |
| Ti | 9.711855258  | 16.296525453 | 4.465233347  |
| Ti | 6.459161905  | 16.259266634 | 2.950961267  |
| Ti | -0.045917356 | 16.655872619 | 5.915410881  |
| Ti | 3.196234157  | 16.331675781 | 1.481719269  |
| Ti | 3.197931274  | 16.332859507 | 4.438957203  |
| Ti | -0.040078501 | 16.655521502 | 2.961632631  |
| Ti | 6.451169377  | 16.251423104 | 5.925421206  |
| Ti | 3.195122056  | 16.332199421 | 7.395334416  |
| Ti | 3.181616691  | 16.318643713 | 10.352193685 |
| Ti | -0.044630946 | 16.656075146 | 8.871620586  |
| Ti | 6.449443815  | 16.312732580 | -0.006323394 |

|    |              |              |              |
|----|--------------|--------------|--------------|
| Ti | 9.703631789  | 16.419382293 | 7.451924265  |
| Ti | 9.710594695  | 16.412446739 | 10.292638747 |
| Ti | 6.448488619  | 16.318579419 | 8.889000161  |
| Ti | -0.049625399 | 16.652450027 | 0.004406171  |
| Ti | 6.444618476  | 19.558597192 | 7.605153429  |
| Ti | 6.450329391  | 19.406580810 | 4.444270232  |
| Ti | 3.214756445  | 19.583203636 | 8.874846518  |
| Ti | 3.230051926  | 19.584362360 | 0.015723668  |
| Ti | 6.451840898  | 19.641428421 | 1.279870686  |
| Ti | -0.040211376 | 20.026752569 | 4.439829045  |
| Ti | 3.240468554  | 19.596412870 | 2.965710412  |
| Ti | 3.270605818  | 19.609504231 | 5.918746473  |
| Ti | -0.050731915 | 20.014767424 | 1.488002797  |
| Ti | 6.429687590  | 20.022668104 | 10.425131331 |
| Ti | 9.668596579  | 19.573254116 | 2.963881556  |
| Ti | 9.667954673  | 19.587507415 | 5.916295143  |
| Ti | -0.027511188 | 20.015811847 | 7.391080847  |
| Ti | -0.022993163 | 20.016783403 | 10.357753715 |
| Ti | 9.693292055  | 19.847434032 | 8.894708298  |
| Ti | 9.685809077  | 19.571648905 | 0.018974915  |
| O  | 0.000000000  | 1.266694833  | 2.957400000  |
| O  | 0.000000000  | 1.266694833  | 0.000000000  |



|   |             |             |              |
|---|-------------|-------------|--------------|
| O | 0.000000000 | 1.266694833 | 8.872200000  |
| O | 0.000000000 | 1.266694833 | 5.914800000  |
| O | 6.494400000 | 1.266694833 | 2.957400000  |
| O | 6.494400000 | 1.266694833 | 0.000000000  |
| O | 6.494400000 | 1.266694833 | 8.872200000  |
| O | 6.494400000 | 1.266694833 | 5.914800000  |
| O | 9.741600000 | 1.980495667 | 8.872200000  |
| O | 9.741600000 | 1.980495667 | 5.914800000  |
| O | 9.741600000 | 1.980495667 | 2.957400000  |
| O | 9.741600000 | 1.980495667 | 0.000000000  |
| O | 3.247200000 | 1.980495667 | 8.872200000  |
| O | 3.247200000 | 1.980495667 | 5.914800000  |
| O | 3.247200000 | 1.980495667 | 2.957400000  |
| O | 3.247200000 | 1.980495667 | 0.000000000  |
| O | 1.266698949 | 3.247194072 | 1.478700000  |
| O | 1.266698949 | 3.247194072 | 4.436100000  |
| O | 5.227599738 | 3.247194072 | 1.478700000  |
| O | 5.227599738 | 3.247194072 | 4.436100000  |
| O | 1.266698949 | 3.247194072 | 7.393500000  |
| O | 1.266698949 | 3.247194072 | 10.350900000 |
| O | 5.227599738 | 3.247194072 | 7.393500000  |
| O | 5.227599738 | 3.247194072 | 10.350900000 |

|   |              |             |              |
|---|--------------|-------------|--------------|
| O | 7.761098949  | 3.247194072 | 1.478700000  |
| O | 7.761098949  | 3.247194072 | 4.436100000  |
| O | 11.721999738 | 3.247194072 | 1.478700000  |
| O | 11.721999738 | 3.247194072 | 4.436100000  |
| O | 7.761098949  | 3.247194072 | 7.393500000  |
| O | 7.761098949  | 3.247194072 | 10.350900000 |
| O | 11.721999738 | 3.247194072 | 7.393500000  |
| O | 11.721999738 | 3.247194072 | 10.350900000 |
| O | 9.741600000  | 4.513896049 | 8.872200000  |
| O | 9.741600000  | 4.513896049 | 5.914800000  |
| O | 9.741600000  | 4.513896049 | 2.957400000  |
| O | 9.741600000  | 4.513896049 | 0.000000000  |
| O | 3.247200000  | 4.513896049 | 8.872200000  |
| O | 3.247200000  | 4.513896049 | 5.914800000  |
| O | 3.247200000  | 4.513896049 | 2.957400000  |
| O | 3.247200000  | 4.513896049 | 0.000000000  |
| O | 0.000000000  | 5.227596870 | 2.957400000  |
| O | 0.000000000  | 5.227596870 | 0.000000000  |
| O | 0.000000000  | 5.227596870 | 8.872200000  |
| O | 0.000000000  | 5.227596870 | 5.914800000  |
| O | 6.494400000  | 5.227596870 | 0.000000000  |
| O | 6.494400000  | 5.227596870 | 2.957400000  |

|   |              |             |              |
|---|--------------|-------------|--------------|
| O | 6.494400000  | 5.227596870 | 8.872200000  |
| O | 6.494400000  | 5.227596870 | 5.914800000  |
| O | 8.474899752  | 6.494391717 | 7.393500000  |
| O | 11.008298949 | 6.494391717 | 7.393500000  |
| O | 8.474899752  | 6.494391717 | 10.350900000 |
| O | 11.008298949 | 6.494391717 | 10.350900000 |
| O | 8.474899752  | 6.494391717 | 1.478700000  |
| O | 11.008298949 | 6.494391717 | 1.478700000  |
| O | 8.474899752  | 6.494391717 | 4.436100000  |
| O | 11.008298949 | 6.494391717 | 4.436100000  |
| O | 1.980499752  | 6.494391717 | 1.478700000  |
| O | 4.513898949  | 6.494391717 | 1.478700000  |
| O | 1.980499752  | 6.494391717 | 4.436100000  |
| O | 4.513898949  | 6.494391717 | 4.436100000  |
| O | 1.980499752  | 6.494391717 | 7.393500000  |
| O | 4.513898949  | 6.494391717 | 7.393500000  |
| O | 1.980499752  | 6.494391717 | 10.350900000 |
| O | 4.513898949  | 6.494391717 | 10.350900000 |
| O | 0.000000000  | 7.761086550 | 8.872200000  |
| O | 0.000000000  | 7.761086550 | 5.914800000  |
| O | 6.494400000  | 7.761086550 | 2.957400000  |
| O | 6.494400000  | 7.761086550 | 0.000000000  |

|   |             |             |              |
|---|-------------|-------------|--------------|
| O | 0.000000000 | 7.761086550 | 2.957400000  |
| O | 0.000000000 | 7.761086550 | 0.000000000  |
| O | 6.494400000 | 7.761086550 | 8.872200000  |
| O | 6.494400000 | 7.761086550 | 5.914800000  |
| O | 3.247200000 | 8.474887384 | 2.957400000  |
| O | 3.247200000 | 8.474887384 | 0.000000000  |
| O | 3.247200000 | 8.474887384 | 8.872200000  |
| O | 3.247200000 | 8.474887384 | 5.914800000  |
| O | 9.741600000 | 8.474887384 | 2.957400000  |
| O | 9.741600000 | 8.474887384 | 0.000000000  |
| O | 9.741600000 | 8.474887384 | 8.872200000  |
| O | 9.741600000 | 8.474887384 | 5.914800000  |
| O | 1.271362708 | 9.792050270 | 1.477055922  |
| O | 1.271090462 | 9.790313613 | 4.435825790  |
| O | 5.212307115 | 9.772165160 | 1.484197925  |
| O | 5.212093579 | 9.769901291 | 4.440591699  |
| O | 1.269944331 | 9.791065498 | 7.393175632  |
| O | 1.269725469 | 9.791600211 | 10.350099491 |
| O | 5.211079803 | 9.770760332 | 7.398652382  |
| O | 5.210766513 | 9.767396319 | 10.356033337 |
| O | 7.761037382 | 9.779604350 | 1.483277819  |
| O | 7.761064269 | 9.777740534 | 4.441008693  |

|   |              |              |              |
|---|--------------|--------------|--------------|
| O | 11.703005826 | 9.782594386  | 1.478519835  |
| O | 11.703510831 | 9.782280416  | 4.434597168  |
| O | 7.759116079  | 9.781544962  | 7.398549583  |
| O | 7.759835139  | 9.776888637  | 10.355749426 |
| O | 11.702126614 | 9.785684791  | 7.392600004  |
| O | 11.702009196 | 9.785283667  | 10.350449884 |
| O | 9.727134503  | 11.074343579 | 2.959066317  |
| O | 9.724110061  | 11.082222113 | 0.002993835  |
| O | 3.244235177  | 11.075296561 | 2.958990963  |
| O | 3.246612776  | 11.075997725 | -0.000120425 |
| O | 3.245335847  | 11.075783054 | 8.873641200  |
| O | 3.244985669  | 11.075813772 | 5.915335999  |
| O | 9.723436202  | 11.083436915 | 8.874031577  |
| O | 9.724313336  | 11.081479873 | 5.913365898  |
| O | 6.465112724  | 11.780974186 | 8.887255177  |
| O | -0.026327778 | 11.803728601 | 2.953682548  |
| O | 6.469097168  | 11.781742501 | -0.006983604 |
| O | 6.467256136  | 11.777168329 | 5.920272373  |
| O | -0.026441170 | 11.804738377 | -0.004106172 |
| O | -0.026197760 | 11.803870763 | 5.910617763  |
| O | 6.466864783  | 11.777546593 | 2.961249470  |
| O | -0.025599236 | 11.804782668 | 8.868233299  |

|   |              |              |              |
|---|--------------|--------------|--------------|
| O | 8.435117525  | 13.096156455 | 1.482757080  |
| O | 8.432241545  | 13.096169314 | 4.438867535  |
| O | 10.970240466 | 13.125996086 | 1.483521035  |
| O | 10.969692469 | 13.126757972 | 4.438647031  |
| O | 1.962157748  | 13.103020213 | 1.480833350  |
| O | 1.962781080  | 13.105075126 | 4.438983465  |
| O | 4.498230690  | 13.108872053 | 1.482439691  |
| O | 4.499726869  | 13.111245578 | 4.437778147  |
| O | 1.961414529  | 13.102595157 | 7.392450123  |
| O | 1.961587670  | 13.103040216 | 10.353234098 |
| O | 4.497814528  | 13.110578705 | 7.396046321  |
| O | 4.496766332  | 13.123078917 | 10.351736708 |
| O | 8.433671482  | 13.096229679 | 7.397659761  |
| O | 8.435517191  | 13.108335911 | 10.353379957 |
| O | 10.970693905 | 13.122492055 | 7.395873728  |
| O | 10.971785094 | 13.121148307 | 10.352180909 |
| O | -0.020044576 | 14.417635979 | 2.965456431  |
| O | -0.023712223 | 14.418268919 | 5.923130404  |
| O | -0.024550391 | 14.420153452 | 8.879053124  |
| O | -0.023819771 | 14.419466934 | 0.007392790  |
| O | 6.473410619  | 14.385393890 | 2.960704244  |
| O | 6.469377077  | 14.380139272 | 5.918668516  |

|   |              |              |              |
|---|--------------|--------------|--------------|
| O | 6.473251636  | 14.397254018 | 8.863349566  |
| O | 6.468355508  | 14.395943489 | 0.019375820  |
| O | 9.701817644  | 15.134265399 | 8.869117561  |
| O | 3.188160968  | 15.121009016 | 8.866669780  |
| O | 9.689364242  | 15.134861191 | 5.930762271  |
| O | 9.688400603  | 15.126388650 | 2.963647922  |
| O | 3.205962898  | 15.127778833 | 2.961907432  |
| O | 9.704219532  | 15.131111770 | -0.007153832 |
| O | 3.193051122  | 15.122527072 | 0.012166625  |
| O | 3.208821603  | 15.128093517 | 5.916663990  |
| O | 1.245377314  | 16.500852629 | 10.355570326 |
| O | 5.182174398  | 16.439348842 | 4.433640271  |
| O | 5.172275244  | 16.426238907 | 7.405292455  |
| O | 7.731345115  | 16.461501035 | 1.474682786  |
| O | 7.723777191  | 16.470060016 | 4.444825750  |
| O | 5.163045402  | 16.385539636 | 10.355483260 |
| O | 11.667228956 | 16.476952706 | 1.491639571  |
| O | 11.667114135 | 16.470901555 | 4.436914113  |
| O | 1.252679228  | 16.492545467 | 4.442247961  |
| O | 1.251348785  | 16.502437837 | 1.482936298  |
| O | 5.176391264  | 16.435487621 | 1.485149380  |
| O | 7.717764026  | 16.463306629 | 7.394467188  |

|   |              |              |              |
|---|--------------|--------------|--------------|
| O | 7.727706952  | 16.424503679 | 10.366393464 |
| O | 1.250024058  | 16.502208164 | 7.392150716  |
| O | 11.668447565 | 16.488063093 | 7.390588026  |
| O | 11.669212216 | 16.486031755 | 10.353274674 |
| O | 3.245490154  | 17.759532482 | 8.877965510  |
| O | 3.256131229  | 17.761065897 | 0.000710722  |
| O | 9.674675728  | 17.762222120 | 2.974383757  |
| O | 9.697683309  | 17.766666275 | 5.890964657  |
| O | 3.249711514  | 17.770981127 | 2.975338997  |
| O | 3.263772929  | 17.782244391 | 5.910822534  |
| O | 9.651091184  | 17.772526330 | 8.870068661  |
| O | 9.703852729  | 17.754211426 | 0.020534293  |
| O | 6.395851117  | 18.475657192 | -0.091691348 |
| O | 6.392952406  | 18.450568185 | 5.977825979  |
| O | -0.062026196 | 18.529380315 | 0.007811321  |
| O | 6.437364750  | 18.473358676 | 2.909522297  |
| O | -0.049285872 | 18.536467317 | 5.909540915  |
| O | 6.401189644  | 18.453537503 | 9.001602575  |
| O | -0.049101950 | 18.531711692 | 8.868903445  |
| O | -0.041609751 | 18.534205948 | 2.977021048  |
| O | 2.057341493  | 20.004015299 | 4.454570737  |
| O | 4.519596356  | 19.979153464 | 1.528451867  |



|   |              |              |              |
|---|--------------|--------------|--------------|
| O | 4.651502686  | 20.099629635 | 4.438778340  |
| O | 2.030410905  | 19.969688293 | 7.372620756  |
| O | 1.997052419  | 19.928393945 | 10.362398253 |
| O | 4.550031453  | 20.009351714 | 7.392028871  |
| O | 4.461843995  | 20.045956161 | 10.331521577 |
| O | 8.388055726  | 19.941058821 | 1.516600974  |
| O | 8.259724823  | 20.058463517 | 4.435807691  |
| O | 10.895285089 | 19.968459203 | 1.513878155  |
| O | 10.859734224 | 20.015073893 | 4.432995085  |
| O | 8.326672865  | 19.825704394 | 7.286020631  |
| O | 8.406392534  | 19.855955151 | 10.419381081 |
| O | 10.883809094 | 19.990118475 | 7.362562284  |
| O | 10.906166326 | 19.996074614 | 10.370611899 |
| O | 2.015931640  | 19.941363861 | 1.497823376  |
| O | -0.019330192 | 21.132429839 | 2.963413814  |
| O | -0.029016070 | 21.133719294 | 5.917657676  |
| O | -0.027611851 | 21.121698073 | 8.870897443  |
| O | -0.022011989 | 21.124865989 | 0.010911150  |
| O | 6.640651680  | 21.161672963 | 8.795987447  |
| O | 6.458584813  | 21.078259872 | 0.088303587  |
| H | 0.000000000  | 0.932897449  | 9.814799089  |
| H | 0.816399334  | 0.932897449  | 8.400899272  |

|   |              |              |              |
|---|--------------|--------------|--------------|
| H | 6.457698847  | 0.932897449  | 6.856699960  |
| H | 0.834099172  | 0.932897449  | -0.439201108 |
| H | 0.000000000  | 0.932897449  | 3.899999089  |
| H | 0.816399334  | 0.932897449  | 2.486099272  |
| H | 6.457698847  | 0.932897449  | 0.941899960  |
| H | 0.834099172  | 0.932897449  | 5.475598892  |
| H | 6.494400000  | 0.932897449  | 9.814799089  |
| H | 7.310799334  | 0.932897449  | 8.400899272  |
| H | -0.036701153 | 0.932897449  | 6.856699960  |
| H | 7.328499172  | 0.932897449  | -0.439201108 |
| H | 6.494400000  | 0.932897449  | 3.899999089  |
| H | 7.310799334  | 0.932897449  | 2.486099272  |
| H | -0.036701153 | 0.932897449  | 0.941899960  |
| H | 7.328499172  | 0.932897449  | 5.475598892  |
| H | 7.609748386  | 21.482180389 | 8.767857486  |
| H | 9.116872231  | 21.529472311 | 8.801018813  |

TS9-B3:

|    |             |             |             |
|----|-------------|-------------|-------------|
| Ti | 3.247200000 | 3.247190143 | 1.478700000 |
| Ti | 3.247200000 | 3.247190143 | 4.436100000 |
| Ti | 0.000000000 | 3.247190143 | 2.957400000 |
| Ti | 0.000000000 | 3.247190143 | 0.000000000 |
| Ti | 3.247200000 | 3.247190143 | 7.393500000 |

|    |             |             |              |
|----|-------------|-------------|--------------|
| Ti | 3.247200000 | 3.247190143 | 10.350900000 |
| Ti | 0.000000000 | 3.247190143 | 8.872200000  |
| Ti | 0.000000000 | 3.247190143 | 5.914800000  |
| Ti | 9.741600000 | 3.247190143 | 1.478700000  |
| Ti | 9.741600000 | 3.247190143 | 4.436100000  |
| Ti | 6.494400000 | 3.247190143 | 2.957400000  |
| Ti | 6.494400000 | 3.247190143 | 0.000000000  |
| Ti | 9.741600000 | 3.247190143 | 7.393500000  |
| Ti | 9.741600000 | 3.247190143 | 10.350900000 |
| Ti | 6.494400000 | 3.247190143 | 8.872200000  |
| Ti | 6.494400000 | 3.247190143 | 5.914800000  |
| Ti | 0.000000000 | 6.494389931 | 4.436100000  |
| Ti | 0.000000000 | 6.494389931 | 1.478700000  |
| Ti | 3.247200000 | 6.494389931 | 2.957400000  |
| Ti | 3.247200000 | 6.494389931 | 0.000000000  |
| Ti | 0.000000000 | 6.494389931 | 10.350900000 |
| Ti | 0.000000000 | 6.494389931 | 7.393500000  |
| Ti | 3.247200000 | 6.494389931 | 8.872200000  |
| Ti | 3.247200000 | 6.494389931 | 5.914800000  |
| Ti | 6.494400000 | 6.494389931 | 4.436100000  |
| Ti | 6.494400000 | 6.494389931 | 1.478700000  |
| Ti | 9.741600000 | 6.494389931 | 2.957400000  |

|    |              |              |              |
|----|--------------|--------------|--------------|
| Ti | 9.741600000  | 6.494389931  | 0.000000000  |
| Ti | 6.494400000  | 6.494389931  | 10.350900000 |
| Ti | 6.494400000  | 6.494389931  | 7.393500000  |
| Ti | 9.741600000  | 6.494389931  | 8.872200000  |
| Ti | 9.741600000  | 6.494389931  | 5.914800000  |
| Ti | 3.230681104  | 9.739583740  | 1.478891403  |
| Ti | 3.230460164  | 9.739658750  | 4.436004299  |
| Ti | -0.006996287 | 9.839170740  | 2.957772514  |
| Ti | -0.012787993 | 9.840483055  | -0.000182767 |
| Ti | 3.227186857  | 9.739576954  | 7.393797869  |
| Ti | 3.227053722  | 9.739818414  | 10.351048816 |
| Ti | -0.012823323 | 9.840753091  | 8.872328588  |
| Ti | -0.012891254 | 9.840309104  | 5.915482568  |
| Ti | 9.741514014  | 9.735746451  | 1.470780556  |
| Ti | 9.741536874  | 9.736312239  | 4.442937982  |
| Ti | 6.489169670  | 9.733396857  | 2.971359283  |
| Ti | 6.481229357  | 9.740648166  | 0.012856882  |
| Ti | 9.735638660  | 9.753532357  | 7.396690088  |
| Ti | 9.736479295  | 9.752305410  | 10.346137995 |
| Ti | 6.482715665  | 9.738137122  | 8.887815663  |
| Ti | 6.481520306  | 9.732873931  | 5.929336922  |
| Ti | -0.029896451 | 13.183659012 | 1.516052908  |

|    |              |              |              |
|----|--------------|--------------|--------------|
| Ti | -0.030241433 | 13.184459474 | 4.473143091  |
| Ti | 3.214342363  | 13.000389956 | 2.960090169  |
| Ti | 3.214687345  | 12.999013704 | 5.916915014  |
| Ti | 6.469532033  | 13.028641165 | 1.463010283  |
| Ti | 6.463517310  | 13.010049796 | 4.439617532  |
| Ti | 9.714977766  | 12.985414062 | 2.963762669  |
| Ti | 9.712673293  | 13.019341015 | 5.922573822  |
| Ti | -0.030048680 | 13.186254710 | 7.429344871  |
| Ti | -0.024430114 | 13.184298739 | 10.386573460 |
| Ti | 3.213137521  | 12.999503769 | 8.873553779  |
| Ti | 3.217904931  | 12.998769387 | 0.005760542  |
| Ti | 6.464142850  | 13.026440876 | 7.416742680  |
| Ti | 6.464990759  | 13.074161782 | 10.354150183 |
| Ti | 9.715364572  | 13.025551831 | 8.877259638  |
| Ti | 9.719100151  | 13.018313023 | 0.001653305  |
| Ti | 9.712852149  | 16.294003336 | 1.459947127  |
| Ti | 9.713627840  | 16.299598356 | 4.460424142  |
| Ti | 6.460028908  | 16.264340871 | 2.949252126  |
| Ti | -0.046061922 | 16.657356385 | 5.915624641  |
| Ti | 3.197367040  | 16.331491471 | 1.482634998  |
| Ti | 3.198069215  | 16.334564374 | 4.440328136  |
| Ti | -0.038726107 | 16.654967858 | 2.961284131  |

|    |              |              |              |
|----|--------------|--------------|--------------|
| Ti | 6.450440575  | 16.259995301 | 5.923621688  |
| Ti | 3.195880472  | 16.332391232 | 7.395860360  |
| Ti | 3.183937010  | 16.320650762 | 10.353546400 |
| Ti | -0.043092033 | 16.656190161 | 8.869779427  |
| Ti | 6.451483706  | 16.321101536 | -0.008205011 |
| Ti | 9.702662305  | 16.403675588 | 7.437866678  |
| Ti | 9.714201425  | 16.395657036 | 10.306360136 |
| Ti | 6.448612791  | 16.321883781 | 8.887681989  |
| Ti | -0.046781891 | 16.648152320 | 0.004162955  |
| Ti | 6.447367036  | 19.573240185 | 7.617122381  |
| Ti | 6.451257701  | 19.413641737 | 4.442876113  |
| Ti | 3.212468988  | 19.583727991 | 8.871915971  |
| Ti | 3.230927631  | 19.584124828 | 0.011637842  |
| Ti | 6.456612593  | 19.639587108 | 1.268413836  |
| Ti | -0.036095875 | 20.026171421 | 4.438690328  |
| Ti | 3.245222975  | 19.598021652 | 2.962104395  |
| Ti | 3.271337607  | 19.611233387 | 5.919632865  |
| Ti | -0.045091528 | 20.013312591 | 1.487197911  |
| Ti | 6.430994913  | 20.047075594 | 10.403940496 |
| Ti | 9.665728003  | 19.576304516 | 2.963452260  |
| Ti | 9.683053244  | 19.582455324 | 5.914954495  |
| Ti | -0.037900149 | 20.021246846 | 7.391484946  |

|    |              |              |              |
|----|--------------|--------------|--------------|
| Ti | -0.029609268 | 20.012124220 | 10.353774001 |
| Ti | 9.659331928  | 19.761988531 | 8.891096366  |
| Ti | 9.704058082  | 19.565986733 | 0.014785107  |
| O  | 0.000000000  | 1.266689833  | 2.957400000  |
| O  | 0.000000000  | 1.266689833  | 0.000000000  |
| O  | 0.000000000  | 1.266689833  | 8.872200000  |
| O  | 0.000000000  | 1.266689833  | 5.914800000  |
| O  | 6.494400000  | 1.266689833  | 2.957400000  |
| O  | 6.494400000  | 1.266689833  | 0.000000000  |
| O  | 6.494400000  | 1.266689833  | 8.872200000  |
| O  | 6.494400000  | 1.266689833  | 5.914800000  |
| O  | 9.741600000  | 1.980499953  | 8.872200000  |
| O  | 9.741600000  | 1.980499953  | 5.914800000  |
| O  | 9.741600000  | 1.980499953  | 2.957400000  |
| O  | 9.741600000  | 1.980499953  | 0.000000000  |
| O  | 3.247200000  | 1.980499953  | 8.872200000  |
| O  | 3.247200000  | 1.980499953  | 5.914800000  |
| O  | 3.247200000  | 1.980499953  | 2.957400000  |
| O  | 3.247200000  | 1.980499953  | 0.000000000  |
| O  | 1.266699988  | 3.247190143  | 1.478700000  |
| O  | 1.266699988  | 3.247190143  | 4.436100000  |
| O  | 5.227599998  | 3.247190143  | 1.478700000  |

|   |              |             |              |
|---|--------------|-------------|--------------|
| O | 5.227599998  | 3.247190143 | 4.436100000  |
| O | 1.266699988  | 3.247190143 | 7.393500000  |
| O | 1.266699988  | 3.247190143 | 10.350900000 |
| O | 5.227599998  | 3.247190143 | 7.393500000  |
| O | 5.227599998  | 3.247190143 | 10.350900000 |
| O | 7.761099988  | 3.247190143 | 1.478700000  |
| O | 7.761099988  | 3.247190143 | 4.436100000  |
| O | 11.721999998 | 3.247190143 | 1.478700000  |
| O | 11.721999998 | 3.247190143 | 4.436100000  |
| O | 7.761099988  | 3.247190143 | 7.393500000  |
| O | 7.761099988  | 3.247190143 | 10.350900000 |
| O | 11.721999998 | 3.247190143 | 7.393500000  |
| O | 11.721999998 | 3.247190143 | 10.350900000 |
| O | 9.741600000  | 4.513899978 | 8.872200000  |
| O | 9.741600000  | 4.513899978 | 5.914800000  |
| O | 9.741600000  | 4.513899978 | 2.957400000  |
| O | 9.741600000  | 4.513899978 | 0.000000000  |
| O | 3.247200000  | 4.513899978 | 8.872200000  |
| O | 3.247200000  | 4.513899978 | 5.914800000  |
| O | 3.247200000  | 4.513899978 | 2.957400000  |
| O | 3.247200000  | 4.513899978 | 0.000000000  |
| O | 0.000000000  | 5.227600085 | 2.957400000  |



|   |              |             |              |
|---|--------------|-------------|--------------|
| O | 0.000000000  | 5.227600085 | 0.000000000  |
| O | 0.000000000  | 5.227600085 | 8.872200000  |
| O | 0.000000000  | 5.227600085 | 5.914800000  |
| O | 6.494400000  | 5.227600085 | 0.000000000  |
| O | 6.494400000  | 5.227600085 | 2.957400000  |
| O | 6.494400000  | 5.227600085 | 8.872200000  |
| O | 6.494400000  | 5.227600085 | 5.914800000  |
| O | 8.474900012  | 6.494389931 | 7.393500000  |
| O | 11.008299988 | 6.494389931 | 7.393500000  |
| O | 8.474900012  | 6.494389931 | 10.350900000 |
| O | 11.008299988 | 6.494389931 | 10.350900000 |
| O | 8.474900012  | 6.494389931 | 1.478700000  |
| O | 11.008299988 | 6.494389931 | 1.478700000  |
| O | 8.474900012  | 6.494389931 | 4.436100000  |
| O | 11.008299988 | 6.494389931 | 4.436100000  |
| O | 1.980500012  | 6.494389931 | 1.478700000  |
| O | 4.513899988  | 6.494389931 | 1.478700000  |
| O | 1.980500012  | 6.494389931 | 4.436100000  |
| O | 4.513899988  | 6.494389931 | 4.436100000  |
| O | 1.980500012  | 6.494389931 | 7.393500000  |
| O | 4.513899988  | 6.494389931 | 7.393500000  |
| O | 1.980500012  | 6.494389931 | 10.350900000 |

|   |             |             |              |
|---|-------------|-------------|--------------|
| O | 4.513899988 | 6.494389931 | 10.350900000 |
| O | 0.000000000 | 7.761090122 | 8.872200000  |
| O | 0.000000000 | 7.761090122 | 5.914800000  |
| O | 6.494400000 | 7.761090122 | 2.957400000  |
| O | 6.494400000 | 7.761090122 | 0.000000000  |
| O | 0.000000000 | 7.761090122 | 2.957400000  |
| O | 0.000000000 | 7.761090122 | 0.000000000  |
| O | 6.494400000 | 7.761090122 | 8.872200000  |
| O | 6.494400000 | 7.761090122 | 5.914800000  |
| O | 3.247200000 | 8.474889884 | 2.957400000  |
| O | 3.247200000 | 8.474889884 | 0.000000000  |
| O | 3.247200000 | 8.474889884 | 8.872200000  |
| O | 3.247200000 | 8.474889884 | 5.914800000  |
| O | 9.741600000 | 8.474889884 | 2.957400000  |
| O | 9.741600000 | 8.474889884 | 0.000000000  |
| O | 9.741600000 | 8.474889884 | 8.872200000  |
| O | 9.741600000 | 8.474889884 | 5.914800000  |
| O | 1.271933306 | 9.790849398 | 1.477200716  |
| O | 1.271669633 | 9.789782829 | 4.436560526  |
| O | 5.212627419 | 9.773033131 | 1.484229392  |
| O | 5.212550525 | 9.770988577 | 4.440512914  |
| O | 1.270806657 | 9.790651158 | 7.393168061  |

|   |              |              |              |
|---|--------------|--------------|--------------|
| O | 1.270475702  | 9.790470420  | 10.350624134 |
| O | 5.211662740  | 9.772401619  | 7.398796822  |
| O | 5.211342696  | 9.768824364  | 10.355718433 |
| O | 7.760914508  | 9.780546974  | 1.483034602  |
| O | 7.761128434  | 9.777996639  | 4.441162004  |
| O | 11.703975700 | 9.782500802  | 1.479190810  |
| O | 11.704296004 | 9.781558893  | 4.434537901  |
| O | 7.759191414  | 9.781744631  | 7.398216107  |
| O | 7.759631994  | 9.777620519  | 10.356058060 |
| O | 11.702617072 | 9.785011489  | 7.393259386  |
| O | 11.702831257 | 9.784917548  | 10.350587462 |
| O | 9.727401163  | 11.074349651 | 2.959054606  |
| O | 9.725781590  | 11.080361869 | 0.003203101  |
| O | 3.245187385  | 11.076190964 | 2.959333785  |
| O | 3.247514199  | 11.075958791 | 0.000138643  |
| O | 3.245466515  | 11.076253830 | 8.873752280  |
| O | 3.246037113  | 11.076224897 | 5.915573064  |
| O | 9.723701434  | 11.082449643 | 8.873911033  |
| O | 9.725957718  | 11.080339723 | 5.912483646  |
| O | 6.466020381  | 11.784206753 | 8.886463658  |
| O | -0.024314644 | 11.802961358 | 2.954300408  |
| O | 6.469219393  | 11.784961852 | -0.007026191 |

|   |              |              |              |
|---|--------------|--------------|--------------|
| O | 6.467755035  | 11.780024061 | 5.918755227  |
| O | -0.024350753 | 11.804211165 | -0.003696277 |
| O | -0.024848743 | 11.803268541 | 5.910483261  |
| O | 6.467669569  | 11.780670575 | 2.960322029  |
| O | -0.023487387 | 11.804361184 | 8.869079588  |
| O | 8.437597867  | 13.095940712 | 1.482086696  |
| O | 8.434063354  | 13.096509716 | 4.438980981  |
| O | 10.972561825 | 13.123940816 | 1.484103525  |
| O | 10.971107079 | 13.126412926 | 4.438555470  |
| O | 1.963946825  | 13.102369056 | 1.481237449  |
| O | 1.963977739  | 13.105042264 | 4.439047108  |
| O | 4.500233303  | 13.111736357 | 1.483221628  |
| O | 4.500813642  | 13.114345985 | 4.438183429  |
| O | 1.962940323  | 13.103121655 | 7.393133756  |
| O | 1.964071258  | 13.103444554 | 10.354254875 |
| O | 4.498986378  | 13.112368583 | 7.395831614  |
| O | 4.498542161  | 13.124525893 | 10.352204568 |
| O | 8.434893339  | 13.092385246 | 7.396102867  |
| O | 8.437113904  | 13.105825581 | 10.354274393 |
| O | 10.971860819 | 13.119559170 | 7.395698413  |
| O | 10.973934351 | 13.119251986 | 10.351558672 |
| O | -0.017326410 | 14.416466183 | 2.965158325  |

|   |              |              |              |
|---|--------------|--------------|--------------|
| O | -0.022648960 | 14.417515963 | 5.923466483  |
| O | -0.021340858 | 14.419397996 | 8.879242871  |
| O | -0.022535048 | 14.419447646 | 0.007759744  |
| O | 6.476136059  | 14.388720041 | 2.959445220  |
| O | 6.471783642  | 14.385215295 | 5.918236381  |
| O | 6.475384007  | 14.398890662 | 8.862936713  |
| O | 6.472247212  | 14.399469309 | 0.017606940  |
| O | 9.699186892  | 15.132826281 | 8.866632517  |
| O | 3.188381778  | 15.122506355 | 8.867446039  |
| O | 9.689713900  | 15.132286925 | 5.932075001  |
| O | 9.690246701  | 15.125671413 | 2.961758261  |
| O | 3.204218372  | 15.128796466 | 2.962279828  |
| O | 9.706115248  | 15.128599298 | -0.009628940 |
| O | 3.194132309  | 15.122794607 | 0.011370848  |
| O | 3.208092672  | 15.130077349 | 5.916759455  |
| O | 1.246207169  | 16.501450922 | 10.354731489 |
| O | 5.182784871  | 16.438141183 | 4.431596471  |
| O | 5.172850388  | 16.426617885 | 7.403553977  |
| O | 7.733813117  | 16.464189602 | 1.473268321  |
| O | 7.726420672  | 16.472286380 | 4.443180134  |
| O | 5.164937741  | 16.384987778 | 10.355029595 |
| O | 11.668280270 | 16.474302358 | 1.491300772  |

|   |              |              |              |
|---|--------------|--------------|--------------|
| O | 11.668350019 | 16.467272150 | 4.435058167  |
| O | 1.252753264  | 16.494276766 | 4.444077764  |
| O | 1.252010305  | 16.502054215 | 1.481640720  |
| O | 5.178023177  | 16.436703138 | 1.483231092  |
| O | 7.720798599  | 16.470920486 | 7.394330201  |
| O | 7.731988321  | 16.428147729 | 10.361827475 |
| O | 1.249465150  | 16.503328668 | 7.390612395  |
| O | 11.666947359 | 16.485258082 | 7.393753508  |
| O | 11.669044011 | 16.483447130 | 10.349402373 |
| O | 3.246745392  | 17.759498906 | 8.876673008  |
| O | 3.255632849  | 17.760958383 | -0.000701140 |
| O | 9.677434679  | 17.761461306 | 2.972897959  |
| O | 9.712461835  | 17.760357947 | 5.887104659  |
| O | 3.251344077  | 17.772039481 | 2.973421300  |
| O | 3.263672396  | 17.782769818 | 5.910618710  |
| O | 9.656084468  | 17.789908969 | 8.870971969  |
| O | 9.712979049  | 17.746313961 | 0.018642267  |
| O | 6.395255191  | 18.476032956 | -0.096647004 |
| O | 6.382507853  | 18.455809944 | 5.968149722  |
| O | -0.065127921 | 18.525592318 | 0.007782930  |
| O | 6.436662446  | 18.478427556 | 2.908365125  |
| O | -0.056619088 | 18.537416370 | 5.909495252  |

|   |              |              |              |
|---|--------------|--------------|--------------|
| O | 6.393143602  | 18.455384174 | 9.004129023  |
| O | -0.050520327 | 18.531916719 | 8.864713519  |
| O | -0.037299937 | 18.533131522 | 2.976052795  |
| O | 2.060183312  | 20.004290692 | 4.451455531  |
| O | 4.520804704  | 19.977770783 | 1.522425869  |
| O | 4.649722831  | 20.105492547 | 4.435054027  |
| O | 2.026851454  | 19.967612306 | 7.371210076  |
| O | 1.993725857  | 19.921646630 | 10.358811282 |
| O | 4.546180793  | 20.018188231 | 7.388646079  |
| O | 4.457702386  | 20.054092586 | 10.331499574 |
| O | 8.394002778  | 19.935560242 | 1.512095434  |
| O | 8.268628776  | 20.058676759 | 4.436398343  |
| O | 10.898964296 | 19.967754825 | 1.517701008  |
| O | 10.865301223 | 20.012747159 | 4.425977175  |
| O | 8.330376102  | 19.771593721 | 7.269032261  |
| O | 8.407460733  | 19.836270781 | 10.440009301 |
| O | 10.877346127 | 20.000849883 | 7.374900438  |
| O | 10.901588034 | 19.984294139 | 10.352651372 |
| O | 2.018655261  | 19.947092470 | 1.495528789  |
| O | -0.020792601 | 21.131916557 | 2.961593238  |
| O | -0.031477448 | 21.134631200 | 5.915655043  |
| O | -0.028422222 | 21.124001947 | 8.872715889  |

|   |              |              |              |
|---|--------------|--------------|--------------|
| O | -0.030374309 | 21.120335752 | 0.007779263  |
| O | 6.715002688  | 21.126525136 | 8.796507595  |
| O | 6.463162456  | 21.080242632 | 0.084893113  |
| H | 0.000000000  | 0.932899949  | 9.814800036  |
| H | 0.816399984  | 0.932899949  | 8.400899982  |
| H | 6.457700016  | 0.932899949  | 6.856699960  |
| H | 0.834099951  | 0.932899949  | -0.439200043 |
| H | 0.000000000  | 0.932899949  | 3.900000036  |
| H | 0.816399984  | 0.932899949  | 2.486099982  |
| H | 6.457700016  | 0.932899949  | 0.941899960  |
| H | 0.834099951  | 0.932899949  | 5.475599957  |
| H | 6.494400000  | 0.932899949  | 9.814800036  |
| H | 7.310799984  | 0.932899949  | 8.400899982  |
| H | -0.036699984 | 0.932899949  | 6.856699960  |
| H | 7.328499951  | 0.932899949  | -0.439200043 |
| H | 6.494400000  | 0.932899949  | 3.900000036  |
| H | 7.310799984  | 0.932899949  | 2.486099982  |
| H | -0.036699984 | 0.932899949  | 0.941899960  |
| H | 7.328499951  | 0.932899949  | 5.475599957  |
| H | 7.828496663  | 21.404153362 | 8.777833506  |
| H | 8.947138100  | 21.505817777 | 8.778945252  |

TS9-E1:



|    |             |             |              |
|----|-------------|-------------|--------------|
| Ti | 3.247200000 | 3.247194072 | 1.478700000  |
| Ti | 3.247200000 | 3.247194072 | 4.436100000  |
| Ti | 0.000000000 | 3.247194072 | 2.957400000  |
| Ti | 0.000000000 | 3.247194072 | 0.000000000  |
| Ti | 3.247200000 | 3.247194072 | 7.393500000  |
| Ti | 3.247200000 | 3.247194072 | 10.350900000 |
| Ti | 0.000000000 | 3.247194072 | 8.872200000  |
| Ti | 0.000000000 | 3.247194072 | 5.914800000  |
| Ti | 9.741600000 | 3.247194072 | 1.478700000  |
| Ti | 9.741600000 | 3.247194072 | 4.436100000  |
| Ti | 6.494400000 | 3.247194072 | 2.957400000  |
| Ti | 6.494400000 | 3.247194072 | 0.000000000  |
| Ti | 9.741600000 | 3.247194072 | 7.393500000  |
| Ti | 9.741600000 | 3.247194072 | 10.350900000 |
| Ti | 6.494400000 | 3.247194072 | 8.872200000  |
| Ti | 6.494400000 | 3.247194072 | 5.914800000  |
| Ti | 0.000000000 | 6.494391717 | 4.436100000  |
| Ti | 0.000000000 | 6.494391717 | 1.478700000  |
| Ti | 3.247200000 | 6.494391717 | 2.957400000  |
| Ti | 3.247200000 | 6.494391717 | 0.000000000  |
| Ti | 0.000000000 | 6.494391717 | 10.350900000 |
| Ti | 0.000000000 | 6.494391717 | 7.393500000  |

|    |              |             |              |
|----|--------------|-------------|--------------|
| Ti | 3.247200000  | 6.494391717 | 8.872200000  |
| Ti | 3.247200000  | 6.494391717 | 5.914800000  |
| Ti | 6.494400000  | 6.494391717 | 4.436100000  |
| Ti | 6.494400000  | 6.494391717 | 1.478700000  |
| Ti | 9.741600000  | 6.494391717 | 2.957400000  |
| Ti | 9.741600000  | 6.494391717 | 0.000000000  |
| Ti | 6.494400000  | 6.494391717 | 10.350900000 |
| Ti | 6.494400000  | 6.494391717 | 7.393500000  |
| Ti | 9.741600000  | 6.494391717 | 8.872200000  |
| Ti | 9.741600000  | 6.494391717 | 5.914800000  |
| Ti | 3.223526743  | 9.738371081 | 1.478735489  |
| Ti | 3.225286466  | 9.738071042 | 4.435780601  |
| Ti | -0.019392538 | 9.837230486 | 2.962167329  |
| Ti | -0.019569835 | 9.835730289 | 0.003832790  |
| Ti | 3.224178781  | 9.736720865 | 7.394055991  |
| Ti | 3.225528447  | 9.738331790 | 10.351692583 |
| Ti | -0.018244328 | 9.837019744 | 8.877274898  |
| Ti | -0.017624762 | 9.837398365 | 5.918751086  |
| Ti | 9.730704085  | 9.741910831 | 1.480545418  |
| Ti | 9.731068291  | 9.745614889 | 4.433686762  |
| Ti | 6.476212952  | 9.731748783 | 2.968886542  |
| Ti | 6.478644586  | 9.741496491 | 0.009380873  |

|    |              |              |              |
|----|--------------|--------------|--------------|
| Ti | 9.734368875  | 9.736585132  | 7.390306008  |
| Ti | 9.729972426  | 9.737831725  | 10.351893686 |
| Ti | 6.476993969  | 9.741560786  | 8.884348999  |
| Ti | 6.480744225  | 9.735552854  | 5.929042838  |
| Ti | -0.042815241 | 13.179944238 | 1.520718739  |
| Ti | -0.043538328 | 13.181862347 | 4.476841142  |
| Ti | 3.201599570  | 12.995480741 | 2.966272200  |
| Ti | 3.202171597  | 12.991887412 | 5.923400119  |
| Ti | 6.451623076  | 13.010486282 | 1.470052562  |
| Ti | 6.450922590  | 13.002174476 | 4.460930330  |
| Ti | 9.700776721  | 13.010547004 | 2.968283232  |
| Ti | 9.699365228  | 13.002492375 | 5.924334658  |
| Ti | -0.042895642 | 13.181762334 | 7.432868909  |
| Ti | -0.043795116 | 13.178661927 | 10.391984201 |
| Ti | 3.198365359  | 12.993605495 | 8.882018568  |
| Ti | 3.201165355  | 12.995044969 | 0.009475510  |
| Ti | 6.448367303  | 13.035071652 | 7.443988733  |
| Ti | 6.452760895  | 13.082131400 | 10.361475662 |
| Ti | 9.703941832  | 12.993809093 | 8.879865581  |
| Ti | 9.703518267  | 13.001385087 | 0.011652156  |
| Ti | 9.687314609  | 16.347227822 | 1.500348168  |
| Ti | 9.681897760  | 16.353300048 | 4.452342041  |

|    |              |              |              |
|----|--------------|--------------|--------------|
| Ti | 6.440594156  | 16.248500578 | 2.963090038  |
| Ti | -0.063417296 | 16.649281754 | 5.932201342  |
| Ti | 3.170065102  | 16.318891960 | 1.496385252  |
| Ti | 3.180865679  | 16.324832025 | 4.455039190  |
| Ti | -0.062840464 | 16.646488530 | 2.982537900  |
| Ti | 6.430442369  | 16.261663020 | 5.951353464  |
| Ti | 3.169606208  | 16.320727915 | 7.411504651  |
| Ti | 3.163612916  | 16.309440719 | 10.367366803 |
| Ti | -0.067514484 | 16.637462346 | 8.891174678  |
| Ti | 6.428376241  | 16.298317831 | 0.007843025  |
| Ti | 9.687386567  | 16.331122137 | 7.403839070  |
| Ti | 9.687916250  | 16.300585986 | 10.367816328 |
| Ti | 6.428828511  | 16.341462780 | 8.904755059  |
| Ti | -0.068153922 | 16.632550987 | 0.022748321  |
| Ti | 6.424718335  | 19.628637099 | 7.663628916  |
| Ti | 6.429076337  | 19.375185975 | 4.479715735  |
| Ti | 3.215334577  | 19.576430247 | 8.876139257  |
| Ti | 3.158993839  | 19.571893937 | 0.006837509  |
| Ti | 6.272712227  | 19.539514687 | 1.297553335  |
| Ti | 6.407339581  | 19.953622613 | 10.454775718 |
| Ti | 3.176447928  | 19.586813753 | 2.995313868  |
| Ti | 3.232453296  | 19.590307068 | 5.943486780  |

|    |              |              |              |
|----|--------------|--------------|--------------|
| Ti | -0.071636479 | 20.019584842 | 4.447385438  |
| Ti | -0.088300070 | 20.001025264 | 1.491038273  |
| Ti | 9.617252762  | 19.645492883 | 3.004753889  |
| Ti | 9.610455593  | 19.618446476 | 5.930154821  |
| Ti | -0.075585334 | 20.007576123 | 7.395369077  |
| Ti | -0.038360213 | 19.998924988 | 10.349492278 |
| Ti | 9.653041322  | 19.570229433 | 8.863635370  |
| Ti | 9.735776731  | 19.577048185 | -0.043130722 |
| O  | 0.000000000  | 1.266694833  | 2.957400000  |
| O  | 0.000000000  | 1.266694833  | 0.000000000  |
| O  | 0.000000000  | 1.266694833  | 8.872200000  |
| O  | 0.000000000  | 1.266694833  | 5.914800000  |
| O  | 6.494400000  | 1.266694833  | 2.957400000  |
| O  | 6.494400000  | 1.266694833  | 0.000000000  |
| O  | 6.494400000  | 1.266694833  | 8.872200000  |
| O  | 6.494400000  | 1.266694833  | 5.914800000  |
| O  | 9.741600000  | 1.980495667  | 8.872200000  |
| O  | 9.741600000  | 1.980495667  | 5.914800000  |
| O  | 9.741600000  | 1.980495667  | 2.957400000  |
| O  | 9.741600000  | 1.980495667  | 0.000000000  |
| O  | 3.247200000  | 1.980495667  | 8.872200000  |
| O  | 3.247200000  | 1.980495667  | 5.914800000  |

|   |              |             |              |
|---|--------------|-------------|--------------|
| O | 3.247200000  | 1.980495667 | 2.957400000  |
| O | 3.247200000  | 1.980495667 | 0.000000000  |
| O | 1.266698949  | 3.247194072 | 1.478700000  |
| O | 1.266698949  | 3.247194072 | 4.436100000  |
| O | 5.227599738  | 3.247194072 | 1.478700000  |
| O | 5.227599738  | 3.247194072 | 4.436100000  |
| O | 1.266698949  | 3.247194072 | 7.393500000  |
| O | 1.266698949  | 3.247194072 | 10.350900000 |
| O | 5.227599738  | 3.247194072 | 7.393500000  |
| O | 5.227599738  | 3.247194072 | 10.350900000 |
| O | 7.761098949  | 3.247194072 | 1.478700000  |
| O | 7.761098949  | 3.247194072 | 4.436100000  |
| O | 11.721999738 | 3.247194072 | 1.478700000  |
| O | 11.721999738 | 3.247194072 | 4.436100000  |
| O | 7.761098949  | 3.247194072 | 7.393500000  |
| O | 7.761098949  | 3.247194072 | 10.350900000 |
| O | 11.721999738 | 3.247194072 | 7.393500000  |
| O | 11.721999738 | 3.247194072 | 10.350900000 |
| O | 9.741600000  | 4.513896049 | 8.872200000  |
| O | 9.741600000  | 4.513896049 | 5.914800000  |
| O | 9.741600000  | 4.513896049 | 2.957400000  |
| O | 9.741600000  | 4.513896049 | 0.000000000  |

|   |              |             |              |
|---|--------------|-------------|--------------|
| O | 3.247200000  | 4.513896049 | 8.872200000  |
| O | 3.247200000  | 4.513896049 | 5.914800000  |
| O | 3.247200000  | 4.513896049 | 2.957400000  |
| O | 3.247200000  | 4.513896049 | 0.000000000  |
| O | 0.000000000  | 5.227596870 | 2.957400000  |
| O | 0.000000000  | 5.227596870 | 0.000000000  |
| O | 0.000000000  | 5.227596870 | 8.872200000  |
| O | 0.000000000  | 5.227596870 | 5.914800000  |
| O | 6.494400000  | 5.227596870 | 0.000000000  |
| O | 6.494400000  | 5.227596870 | 2.957400000  |
| O | 6.494400000  | 5.227596870 | 8.872200000  |
| O | 6.494400000  | 5.227596870 | 5.914800000  |
| O | 8.474899752  | 6.494391717 | 7.393500000  |
| O | 11.008298949 | 6.494391717 | 7.393500000  |
| O | 8.474899752  | 6.494391717 | 10.350900000 |
| O | 11.008298949 | 6.494391717 | 10.350900000 |
| O | 8.474899752  | 6.494391717 | 1.478700000  |
| O | 11.008298949 | 6.494391717 | 1.478700000  |
| O | 8.474899752  | 6.494391717 | 4.436100000  |
| O | 11.008298949 | 6.494391717 | 4.436100000  |
| O | 1.980499752  | 6.494391717 | 1.478700000  |
| O | 4.513898949  | 6.494391717 | 1.478700000  |

|   |             |             |              |
|---|-------------|-------------|--------------|
| O | 1.980499752 | 6.494391717 | 4.436100000  |
| O | 4.513898949 | 6.494391717 | 4.436100000  |
| O | 1.980499752 | 6.494391717 | 7.393500000  |
| O | 4.513898949 | 6.494391717 | 7.393500000  |
| O | 1.980499752 | 6.494391717 | 10.350900000 |
| O | 4.513898949 | 6.494391717 | 10.350900000 |
| O | 0.000000000 | 7.761086550 | 8.872200000  |
| O | 0.000000000 | 7.761086550 | 5.914800000  |
| O | 6.494400000 | 7.761086550 | 2.957400000  |
| O | 6.494400000 | 7.761086550 | 0.000000000  |
| O | 0.000000000 | 7.761086550 | 2.957400000  |
| O | 0.000000000 | 7.761086550 | 0.000000000  |
| O | 6.494400000 | 7.761086550 | 8.872200000  |
| O | 6.494400000 | 7.761086550 | 5.914800000  |
| O | 3.247200000 | 8.474887384 | 2.957400000  |
| O | 3.247200000 | 8.474887384 | 0.000000000  |
| O | 3.247200000 | 8.474887384 | 8.872200000  |
| O | 3.247200000 | 8.474887384 | 5.914800000  |
| O | 9.741600000 | 8.474887384 | 2.957400000  |
| O | 9.741600000 | 8.474887384 | 0.000000000  |
| O | 9.741600000 | 8.474887384 | 8.872200000  |
| O | 9.741600000 | 8.474887384 | 5.914800000  |



|   |              |              |              |
|---|--------------|--------------|--------------|
| O | 1.263579429  | 9.789852838  | 1.481834844  |
| O | 1.263628916  | 9.789170606  | 4.439376799  |
| O | 5.206358114  | 9.770364566  | 1.486921572  |
| O | 5.206667767  | 9.767964251  | 4.444084980  |
| O | 1.264118334  | 9.790310041  | 7.396895095  |
| O | 1.263839984  | 9.791156581  | 10.354342414 |
| O | 5.206652571  | 9.769953798  | 7.399426630  |
| O | 5.206367986  | 9.764510226  | 10.357678361 |
| O | 7.755363615  | 9.778847823  | 1.487229142  |
| O | 7.756132422  | 9.776265341  | 4.443469841  |
| O | 11.696264249 | 9.783309122  | 1.481184216  |
| O | 11.696416608 | 9.782830488  | 4.439980109  |
| O | 7.756317382  | 9.778208453  | 7.400999966  |
| O | 7.756012795  | 9.772382688  | 10.357524576 |
| O | 11.696209307 | 9.782959076  | 7.397285472  |
| O | 11.696089031 | 9.782991224  | 10.353963866 |
| O | 9.717201578  | 11.079804296 | 2.963137356  |
| O | 9.715074922  | 11.076757467 | 0.003477902  |
| O | 3.235001698  | 11.073139135 | 2.963515903  |
| O | 3.236996648  | 11.072885530 | 0.004010234  |
| O | 3.236465406  | 11.072335458 | 8.877736253  |
| O | 3.235628148  | 11.072021131 | 5.918751086  |

|   |              |              |              |
|---|--------------|--------------|--------------|
| O | 9.715655911  | 11.075203692 | 8.877523320  |
| O | 9.717461484  | 11.077239673 | 5.918869382  |
| O | 6.458887582  | 11.774477619 | 8.898804770  |
| O | -0.039112654 | 11.803860047 | 2.965219366  |
| O | 6.456402305  | 11.771230764 | 0.002519705  |
| O | 6.457996550  | 11.777824487 | 5.931065700  |
| O | -0.040017454 | 11.805381675 | 0.008280720  |
| O | -0.039647013 | 11.803456423 | 5.921613850  |
| O | 6.458298150  | 11.775302727 | 2.979190123  |
| O | -0.040933164 | 11.804510132 | 8.880480720  |
| O | 8.421585144  | 13.094472305 | 1.494551664  |
| O | 8.419882702  | 13.102269757 | 4.450449305  |
| O | 10.956590017 | 13.124558397 | 1.494930211  |
| O | 10.955963827 | 13.127108732 | 4.447787645  |
| O | 1.947039045  | 13.100869574 | 1.493794570  |
| O | 1.947756676  | 13.102576941 | 4.448769502  |
| O | 4.483722979  | 13.099358661 | 1.493416022  |
| O | 4.485195130  | 13.105698779 | 4.448899627  |
| O | 1.946384929  | 13.097394117 | 7.402348541  |
| O | 1.945524680  | 13.097169088 | 10.364066345 |
| O | 4.482157699  | 13.101719685 | 7.405861932  |
| O | 4.480800240  | 13.118911227 | 10.363297421 |

|   |              |              |              |
|---|--------------|--------------|--------------|
| O | 8.422460849  | 13.095986790 | 7.404454210  |
| O | 8.423989501  | 13.112271070 | 10.364551358 |
| O | 10.957073590 | 13.123479684 | 7.402194756  |
| O | 10.957011244 | 13.122622429 | 10.363463035 |
| O | -0.042075269 | 14.418510380 | 2.976433826  |
| O | -0.043161133 | 14.418238915 | 5.933147710  |
| O | -0.041448040 | 14.418674687 | 8.890015378  |
| O | -0.043291800 | 14.419117602 | 0.019826410  |
| O | 6.449189754  | 14.381969869 | 2.976670418  |
| O | 6.444320772  | 14.388424288 | 5.931893772  |
| O | 6.451304720  | 14.392014045 | 8.873560404  |
| O | 6.444924622  | 14.378855175 | 0.039155976  |
| O | 9.690248519  | 15.120373932 | 8.873028072  |
| O | 3.170338906  | 15.112222862 | 8.878363222  |
| O | 9.674081360  | 15.137290438 | 5.920561015  |
| O | 9.670508401  | 15.142505409 | 2.979686966  |
| O | 3.198606821  | 15.120538240 | 2.979970877  |
| O | 9.691934596  | 15.123292172 | 0.034495114  |
| O | 3.174920835  | 15.112297872 | 0.028107130  |
| O | 3.196923732  | 15.121359776 | 5.931550714  |
| O | 1.223341296  | 16.484245806 | 10.368940140 |
| O | 5.165012166  | 16.481016811 | 4.454187458  |

|   |              |              |              |
|---|--------------|--------------|--------------|
| O | 5.153921550  | 16.439382775 | 7.420897354  |
| O | 7.710447305  | 16.434760740 | 1.487193653  |
| O | 7.701426843  | 16.474205203 | 4.461131434  |
| O | 5.141011462  | 16.364308635 | 10.369117584 |
| O | 11.635578108 | 16.485946030 | 1.506736152  |
| O | 11.634030882 | 16.489471492 | 4.453690615  |
| O | 1.229037664  | 16.483860042 | 4.456482401  |
| O | 1.226428993  | 16.491232438 | 1.502134438  |
| O | 5.152335747  | 16.448873306 | 1.502595792  |
| O | 7.711314178  | 16.439186321 | 7.419513290  |
| O | 7.721725870  | 16.384114806 | 10.373955890 |
| O | 1.227724496  | 16.493407723 | 7.405672658  |
| O | 11.638389794 | 16.482834907 | 7.404773609  |
| O | 11.637945706 | 16.477523496 | 10.368183046 |
| O | 3.231362496  | 17.752765879 | 8.896131281  |
| O | 3.219388252  | 17.750962071 | 0.011309098  |
| O | 9.613450161  | 17.816249212 | 2.975795028  |
| O | 9.629054386  | 17.790985182 | 5.926345690  |
| O | 3.216922588  | 17.765710436 | 2.986500816  |
| O | 3.231746056  | 17.766078341 | 5.928214766  |
| O | 9.638826380  | 17.750158394 | 8.888158130  |
| O | 9.643414673  | 17.761767061 | 0.009487339  |

|   |              |              |              |
|---|--------------|--------------|--------------|
| O | 6.403251096  | 18.400504471 | -0.107140687 |
| O | 6.459915775  | 18.488326712 | 6.061380574  |
| O | -0.078511581 | 18.512172699 | 0.023836644  |
| O | 6.504890664  | 18.472788958 | 2.900759875  |
| O | -0.075055651 | 18.531532383 | 5.918100458  |
| O | 6.426475330  | 18.447342761 | 9.034206372  |
| O | -0.067422003 | 18.516962614 | 8.878055652  |
| O | -0.072362293 | 18.527806894 | 2.988902225  |
| O | 2.011100196  | 20.001211002 | 4.469317517  |
| O | 4.453382571  | 19.994038632 | 1.523013682  |
| O | 4.626355330  | 20.042887901 | 4.442381518  |
| O | 1.998702906  | 19.952258148 | 7.397439257  |
| O | 1.972000790  | 19.932451977 | 10.351491480 |
| O | 4.532321614  | 19.996785421 | 7.385869908  |
| O | 4.456611067  | 20.036640653 | 10.382626987 |
| O | 8.345752893  | 20.182402642 | 1.460435098  |
| O | 8.214051397  | 20.111707648 | 4.458670877  |
| O | 10.841211416 | 19.963531056 | 1.512840226  |
| O | 10.821416354 | 20.032593693 | 4.439329481  |
| O | 8.331107631  | 20.048356476 | 7.399284674  |
| O | 8.429149432  | 20.022385210 | 10.361522981 |
| O | 10.862040515 | 19.972825134 | 7.381138068  |

|   |              |              |              |
|---|--------------|--------------|--------------|
| O | 10.910262214 | 19.933834301 | 10.331984470 |
| O | 1.970478243  | 19.943857046 | 1.511018467  |
| O | -0.070704793 | 21.122758213 | 2.965822675  |
| O | -0.067466815 | 21.129866288 | 5.925115411  |
| O | -0.058193071 | 21.117639684 | 8.877795401  |
| O | -0.072502183 | 21.106323913 | 0.009972353  |
| O | 6.421997311  | 21.258161699 | 8.863304141  |
| O | 6.605665568  | 21.092775706 | 0.197826401  |
| H | 0.000000000  | 0.932897449  | 9.814799089  |
| H | 0.816399334  | 0.932897449  | 8.400899272  |
| H | 6.457698847  | 0.932897449  | 6.856699960  |
| H | 0.834099172  | 0.932897449  | -0.439201108 |
| H | 0.000000000  | 0.932897449  | 3.899999089  |
| H | 0.816399334  | 0.932897449  | 2.486099272  |
| H | 6.457698847  | 0.932897449  | 0.941899960  |
| H | 0.834099172  | 0.932897449  | 5.475598892  |
| H | 6.494400000  | 0.932897449  | 9.814799089  |
| H | 7.310799334  | 0.932897449  | 8.400899272  |
| H | -0.036701153 | 0.932897449  | 6.856699960  |
| H | 7.328499172  | 0.932897449  | -0.439201108 |
| H | 6.494400000  | 0.932897449  | 3.899999089  |
| H | 7.310799334  | 0.932897449  | 2.486099272  |

|   |              |              |             |
|---|--------------|--------------|-------------|
| H | -0.036701153 | 0.932897449  | 0.941899960 |
| H | 7.328499172  | 0.932897449  | 5.475598892 |
| H | 7.225798289  | 21.806808713 | 8.814341426 |
| H | 7.740513779  | 20.934787112 | 0.847815602 |

9-Eb:

|    |             |             |              |
|----|-------------|-------------|--------------|
| Ti | 3.247200000 | 3.247194072 | 1.478700000  |
| Ti | 3.247200000 | 3.247194072 | 4.436100000  |
| Ti | 0.000000000 | 3.247194072 | 2.957400000  |
| Ti | 0.000000000 | 3.247194072 | 0.000000000  |
| Ti | 3.247200000 | 3.247194072 | 7.393500000  |
| Ti | 3.247200000 | 3.247194072 | 10.350900000 |
| Ti | 0.000000000 | 3.247194072 | 8.872200000  |
| Ti | 0.000000000 | 3.247194072 | 5.914800000  |
| Ti | 9.741600000 | 3.247194072 | 1.478700000  |
| Ti | 9.741600000 | 3.247194072 | 4.436100000  |
| Ti | 6.494400000 | 3.247194072 | 2.957400000  |
| Ti | 6.494400000 | 3.247194072 | 0.000000000  |
| Ti | 9.741600000 | 3.247194072 | 7.393500000  |
| Ti | 9.741600000 | 3.247194072 | 10.350900000 |
| Ti | 6.494400000 | 3.247194072 | 8.872200000  |
| Ti | 6.494400000 | 3.247194072 | 5.914800000  |
| Ti | 0.000000000 | 6.494391717 | 4.436100000  |

|    |              |             |              |
|----|--------------|-------------|--------------|
| Ti | 0.000000000  | 6.494391717 | 1.478700000  |
| Ti | 3.247200000  | 6.494391717 | 2.957400000  |
| Ti | 3.247200000  | 6.494391717 | 0.000000000  |
| Ti | 0.000000000  | 6.494391717 | 10.350900000 |
| Ti | 0.000000000  | 6.494391717 | 7.393500000  |
| Ti | 3.247200000  | 6.494391717 | 8.872200000  |
| Ti | 3.247200000  | 6.494391717 | 5.914800000  |
| Ti | 6.494400000  | 6.494391717 | 4.436100000  |
| Ti | 6.494400000  | 6.494391717 | 1.478700000  |
| Ti | 9.741600000  | 6.494391717 | 2.957400000  |
| Ti | 9.741600000  | 6.494391717 | 0.000000000  |
| Ti | 6.494400000  | 6.494391717 | 10.350900000 |
| Ti | 6.494400000  | 6.494391717 | 7.393500000  |
| Ti | 9.741600000  | 6.494391717 | 8.872200000  |
| Ti | 9.741600000  | 6.494391717 | 5.914800000  |
| Ti | 3.225530525  | 9.738416444 | 1.479508908  |
| Ti | 3.226370381  | 9.738640759 | 4.437179096  |
| Ti | -0.017347192 | 9.838062738 | 2.964972955  |
| Ti | -0.016840369 | 9.836754709 | 0.008084230  |
| Ti | 3.226906169  | 9.739195832 | 7.394755002  |
| Ti | 3.225697561  | 9.738583252 | 10.352048299 |
| Ti | -0.014443675 | 9.838904277 | 8.879594683  |



|    |              |              |              |
|----|--------------|--------------|--------------|
| Ti | -0.014863863 | 9.840737017  | 5.921444686  |
| Ti | 9.730472235  | 9.744236137  | 1.481232481  |
| Ti | 9.732124151  | 9.743607126  | 4.433319216  |
| Ti | 6.476668080  | 9.733480082  | 2.969064222  |
| Ti | 6.478136334  | 9.743734999  | 0.009643845  |
| Ti | 9.736480854  | 9.734912056  | 7.391223512  |
| Ti | 9.734950774  | 9.736149361  | 10.354468635 |
| Ti | 6.481151554  | 9.743666776  | 8.886264803  |
| Ti | 6.481054657  | 9.733632959  | 5.929995949  |
| Ti | -0.034634375 | 13.181179758 | 1.519252224  |
| Ti | -0.035264332 | 13.186048254 | 4.473548728  |
| Ti | 3.208793547  | 12.996781269 | 2.960092417  |
| Ti | 3.211108671  | 12.996554810 | 5.916581893  |
| Ti | 6.456739494  | 13.024950323 | 1.459239717  |
| Ti | 6.459156190  | 13.005869604 | 4.442771658  |
| Ti | 9.705754549  | 13.006643277 | 2.961057476  |
| Ti | 9.707633898  | 12.995832930 | 5.917655429  |
| Ti | -0.034639571 | 13.186519387 | 7.429877203  |
| Ti | -0.035554632 | 13.178668714 | 10.389103930 |
| Ti | 3.208460125  | 12.996336210 | 8.873497589  |
| Ti | 3.208479998  | 12.996252985 | 0.001845181  |
| Ti | 6.460242573  | 13.027894638 | 7.426200800  |

|    |              |              |              |
|----|--------------|--------------|--------------|
| Ti | 6.460142430  | 13.085707941 | 10.356182271 |
| Ti | 9.710003315  | 12.988577692 | 8.875611302  |
| Ti | 9.709935384  | 12.999322674 | 0.006075801  |
| Ti | 9.690973554  | 16.339736482 | 1.493871462  |
| Ti | 9.687090812  | 16.337654780 | 4.445174486  |
| Ti | 6.444434035  | 16.261694809 | 2.955735102  |
| Ti | -0.053840784 | 16.658156490 | 5.921460538  |
| Ti | 3.170173169  | 16.322169533 | 1.486859230  |
| Ti | 3.191912264  | 16.334995502 | 4.446281618  |
| Ti | -0.057414523 | 16.654037021 | 2.975582805  |
| Ti | 6.437377350  | 16.260505010 | 5.951656657  |
| Ti | 3.174103969  | 16.323500422 | 7.404029882  |
| Ti | 3.163479780  | 16.316416635 | 10.358779815 |
| Ti | -0.059126316 | 16.641189621 | 8.881720225  |
| Ti | 6.426286733  | 16.323150019 | 0.006577849  |
| Ti | 9.695082691  | 16.318754085 | 7.398834795  |
| Ti | 9.690226049  | 16.299640862 | 10.361706694 |
| Ti | 6.434385509  | 16.330519557 | 8.904241536  |
| Ti | -0.069851688 | 16.632070567 | 0.016313728  |
| Ti | 6.422041603  | 19.603577739 | 7.638692474  |
| Ti | 6.441653782  | 19.339602376 | 4.452992077  |
| Ti | 3.210205300  | 19.577077118 | 8.873303583  |

|    |              |              |              |
|----|--------------|--------------|--------------|
| Ti | 3.165452130  | 19.579990714 | 0.010158432  |
| Ti | 6.287417497  | 19.660833111 | 1.287868205  |
| Ti | -0.030726695 | 20.035424422 | 4.458932074  |
| Ti | 3.189163834  | 19.592455922 | 2.991616763  |
| Ti | 3.245299349  | 19.597142966 | 5.943790919  |
| Ti | -0.084116378 | 20.005072938 | 1.496866480  |
| Ti | 6.411583411  | 20.010438999 | 10.461223796 |
| Ti | 9.683002847  | 19.616203325 | 3.075905857  |
| Ti | 9.616515518  | 19.593662509 | 5.951425979  |
| Ti | -0.073627922 | 20.013487614 | 7.405015169  |
| Ti | -0.016754513 | 19.998545652 | 10.355449546 |
| Ti | 9.640011478  | 19.558690061 | 8.851262791  |
| Ti | 9.772994839  | 19.574396766 | -0.082846001 |
| O  | 0.000000000  | 1.266694833  | 2.957400000  |
| O  | 0.000000000  | 1.266694833  | 0.000000000  |
| O  | 0.000000000  | 1.266694833  | 8.872200000  |
| O  | 0.000000000  | 1.266694833  | 5.914800000  |
| O  | 6.494400000  | 1.266694833  | 2.957400000  |
| O  | 6.494400000  | 1.266694833  | 0.000000000  |
| O  | 6.494400000  | 1.266694833  | 8.872200000  |
| O  | 6.494400000  | 1.266694833  | 5.914800000  |
| O  | 9.741600000  | 1.980495667  | 8.872200000  |

|   |              |             |              |
|---|--------------|-------------|--------------|
| O | 9.741600000  | 1.980495667 | 5.914800000  |
| O | 9.741600000  | 1.980495667 | 2.957400000  |
| O | 9.741600000  | 1.980495667 | 0.000000000  |
| O | 3.247200000  | 1.980495667 | 8.872200000  |
| O | 3.247200000  | 1.980495667 | 5.914800000  |
| O | 3.247200000  | 1.980495667 | 2.957400000  |
| O | 3.247200000  | 1.980495667 | 0.000000000  |
| O | 1.266698949  | 3.247194072 | 1.478700000  |
| O | 1.266698949  | 3.247194072 | 4.436100000  |
| O | 5.227599738  | 3.247194072 | 1.478700000  |
| O | 5.227599738  | 3.247194072 | 4.436100000  |
| O | 1.266698949  | 3.247194072 | 7.393500000  |
| O | 1.266698949  | 3.247194072 | 10.350900000 |
| O | 5.227599738  | 3.247194072 | 7.393500000  |
| O | 5.227599738  | 3.247194072 | 10.350900000 |
| O | 7.761098949  | 3.247194072 | 1.478700000  |
| O | 7.761098949  | 3.247194072 | 4.436100000  |
| O | 11.721999738 | 3.247194072 | 1.478700000  |
| O | 11.721999738 | 3.247194072 | 4.436100000  |
| O | 7.761098949  | 3.247194072 | 7.393500000  |
| O | 7.761098949  | 3.247194072 | 10.350900000 |
| O | 11.721999738 | 3.247194072 | 7.393500000  |

|   |              |             |              |
|---|--------------|-------------|--------------|
| O | 11.721999738 | 3.247194072 | 10.350900000 |
| O | 9.741600000  | 4.513896049 | 8.872200000  |
| O | 9.741600000  | 4.513896049 | 5.914800000  |
| O | 9.741600000  | 4.513896049 | 2.957400000  |
| O | 9.741600000  | 4.513896049 | 0.000000000  |
| O | 3.247200000  | 4.513896049 | 8.872200000  |
| O | 3.247200000  | 4.513896049 | 5.914800000  |
| O | 3.247200000  | 4.513896049 | 2.957400000  |
| O | 3.247200000  | 4.513896049 | 0.000000000  |
| O | 0.000000000  | 5.227596870 | 2.957400000  |
| O | 0.000000000  | 5.227596870 | 0.000000000  |
| O | 0.000000000  | 5.227596870 | 8.872200000  |
| O | 0.000000000  | 5.227596870 | 5.914800000  |
| O | 6.494400000  | 5.227596870 | 0.000000000  |
| O | 6.494400000  | 5.227596870 | 2.957400000  |
| O | 6.494400000  | 5.227596870 | 8.872200000  |
| O | 6.494400000  | 5.227596870 | 5.914800000  |
| O | 8.474899752  | 6.494391717 | 7.393500000  |
| O | 11.008298949 | 6.494391717 | 7.393500000  |
| O | 8.474899752  | 6.494391717 | 10.350900000 |
| O | 11.008298949 | 6.494391717 | 10.350900000 |
| O | 8.474899752  | 6.494391717 | 1.478700000  |

|   |              |             |              |
|---|--------------|-------------|--------------|
| O | 11.008298949 | 6.494391717 | 1.478700000  |
| O | 8.474899752  | 6.494391717 | 4.436100000  |
| O | 11.008298949 | 6.494391717 | 4.436100000  |
| O | 1.980499752  | 6.494391717 | 1.478700000  |
| O | 4.513898949  | 6.494391717 | 1.478700000  |
| O | 1.980499752  | 6.494391717 | 4.436100000  |
| O | 4.513898949  | 6.494391717 | 4.436100000  |
| O | 1.980499752  | 6.494391717 | 7.393500000  |
| O | 4.513898949  | 6.494391717 | 7.393500000  |
| O | 1.980499752  | 6.494391717 | 10.350900000 |
| O | 4.513898949  | 6.494391717 | 10.350900000 |
| O | 0.000000000  | 7.761086550 | 8.872200000  |
| O | 0.000000000  | 7.761086550 | 5.914800000  |
| O | 6.494400000  | 7.761086550 | 2.957400000  |
| O | 6.494400000  | 7.761086550 | 0.000000000  |
| O | 0.000000000  | 7.761086550 | 2.957400000  |
| O | 0.000000000  | 7.761086550 | 0.000000000  |
| O | 6.494400000  | 7.761086550 | 8.872200000  |
| O | 6.494400000  | 7.761086550 | 5.914800000  |
| O | 3.247200000  | 8.474887384 | 2.957400000  |
| O | 3.247200000  | 8.474887384 | 0.000000000  |
| O | 3.247200000  | 8.474887384 | 8.872200000  |

|   |              |              |              |
|---|--------------|--------------|--------------|
| O | 3.247200000  | 8.474887384  | 5.914800000  |
| O | 9.741600000  | 8.474887384  | 2.957400000  |
| O | 9.741600000  | 8.474887384  | 0.000000000  |
| O | 9.741600000  | 8.474887384  | 8.872200000  |
| O | 9.741600000  | 8.474887384  | 5.914800000  |
| O | 1.266881312  | 9.791363751  | 1.481208822  |
| O | 1.266561268  | 9.790481492  | 4.438593916  |
| O | 5.207596856  | 9.770350636  | 1.484552695  |
| O | 5.207693103  | 9.768808648  | 4.442161724  |
| O | 1.267350467  | 9.791842743  | 7.397289021  |
| O | 1.267136542  | 9.791845957  | 10.354473486 |
| O | 5.208821830  | 9.771152527  | 7.398841183  |
| O | 5.207915082  | 9.766698371  | 10.355591383 |
| O | 7.756343360  | 9.780214073  | 1.484878837  |
| O | 7.757229586  | 9.778693874  | 4.441574384  |
| O | 11.698300244 | 9.784986128  | 1.481370177  |
| O | 11.699075675 | 9.784138874  | 4.439467296  |
| O | 7.758415463  | 9.779650071  | 7.398111178  |
| O | 7.758100874  | 9.774765501  | 10.356412475 |
| O | 11.699481186 | 9.784519996  | 7.397207633  |
| O | 11.699125552 | 9.784765742  | 10.353778142 |
| O | 9.720316812  | 11.077998702 | 2.960348528  |

|   |              |              |              |
|---|--------------|--------------|--------------|
| O | 9.719828953  | 11.076298121 | 0.001031896  |
| O | 3.239624282  | 11.075039027 | 2.960009965  |
| O | 3.242089687  | 11.074942586 | 0.001834771  |
| O | 3.242030847  | 11.074852574 | 8.874825343  |
| O | 3.240322041  | 11.075235125 | 5.916467974  |
| O | 9.719852592  | 11.073943527 | 8.875125223  |
| O | 9.722282147  | 11.075370857 | 5.917540209  |
| O | 6.461646013  | 11.779605078 | 8.889956348  |
| O | -0.032257035 | 11.805230227 | 2.956956745  |
| O | 6.458264639  | 11.777974507 | -0.003353692 |
| O | 6.459854858  | 11.779870827 | 5.922118027  |
| O | -0.032624489 | 11.806109985 | 0.000317152  |
| O | -0.032673846 | 11.805631351 | 5.915028548  |
| O | 6.458925899  | 11.778812474 | 2.966142548  |
| O | -0.032840362 | 11.806707564 | 8.873180437  |
| O | 8.426426070  | 13.092768510 | 1.486569287  |
| O | 8.425284744  | 13.093308224 | 4.443044685  |
| O | 10.963012199 | 13.120746468 | 1.487047912  |
| O | 10.962255342 | 13.122966045 | 4.440415556  |
| O | 1.953892065  | 13.104977970 | 1.484813419  |
| O | 1.954656196  | 13.105321944 | 4.441151239  |
| O | 4.489380251  | 13.109689303 | 1.486452173  |



|   |              |              |              |
|---|--------------|--------------|--------------|
| O | 4.491759669  | 13.109957552 | 4.440540595  |
| O | 1.954657106  | 13.104164292 | 7.395211152  |
| O | 1.953154301  | 13.101104247 | 10.355771548 |
| O | 4.490643542  | 13.109126729 | 7.397619895  |
| O | 4.488315559  | 13.123424320 | 10.355955025 |
| O | 8.427888479  | 13.092947462 | 7.398243433  |
| O | 8.429145275  | 13.107720830 | 10.358081750 |
| O | 10.963225475 | 13.121466563 | 7.396775143  |
| O | 10.963779577 | 13.120038518 | 10.356907307 |
| O | -0.036463978 | 14.420497426 | 2.969337841  |
| O | -0.036480214 | 14.421096076 | 5.925535125  |
| O | -0.035704653 | 14.422238012 | 8.883824948  |
| O | -0.038154210 | 14.422329452 | 0.012445567  |
| O | 6.457599093  | 14.391170362 | 2.971628051  |
| O | 6.455987832  | 14.389879836 | 5.920814760  |
| O | 6.457008882  | 14.399063899 | 8.867989136  |
| O | 6.452585026  | 14.397557272 | 0.026687341  |
| O | 9.692393620  | 15.114790699 | 8.874249478  |
| O | 3.178013988  | 15.116838825 | 8.876285589  |
| O | 9.676384794  | 15.125222426 | 5.917374831  |
| O | 9.671085753  | 15.129703371 | 2.973229306  |
| O | 3.202741416  | 15.128918982 | 2.974773305  |

|   |              |              |              |
|---|--------------|--------------|--------------|
| O | 9.693505591  | 15.119740992 | 0.025607890  |
| O | 3.179864892  | 15.117923611 | 0.019005554  |
| O | 3.205296443  | 15.128166027 | 5.919523678  |
| O | 1.225953863  | 16.489663303 | 10.368135609 |
| O | 5.173277719  | 16.500390068 | 4.448846157  |
| O | 5.158090045  | 16.440824750 | 7.417960537  |
| O | 7.716237322  | 16.443000750 | 1.481427669  |
| O | 7.706170873  | 16.493597034 | 4.453048150  |
| O | 5.145535461  | 16.396140313 | 10.367796691 |
| O | 11.637946746 | 16.484566920 | 1.502471226  |
| O | 11.638879861 | 16.489184669 | 4.450032666  |
| O | 1.235204616  | 16.492797286 | 4.448192217  |
| O | 1.229189373  | 16.496739589 | 1.497196171  |
| O | 5.155046899  | 16.450142044 | 1.493289919  |
| O | 7.715883767  | 16.433904913 | 7.418415267  |
| O | 7.722617291  | 16.406919943 | 10.374018232 |
| O | 1.232730899  | 16.491240653 | 7.398771506  |
| O | 11.643021080 | 16.487047246 | 7.400152494  |
| O | 11.638838557 | 16.487107968 | 10.360823497 |
| O | 3.223688713  | 17.754013900 | 8.887487274  |
| O | 3.221623494  | 17.759564986 | 0.011164422  |
| O | 9.635771024  | 17.796286234 | 2.974728471  |

|   |              |              |              |
|---|--------------|--------------|--------------|
| O | 9.636204720  | 17.769393062 | 5.931274492  |
| O | 3.220487494  | 17.773259998 | 2.978281965  |
| O | 3.234555533  | 17.773464310 | 5.926686974  |
| O | 9.632856857  | 17.741025767 | 8.884179244  |
| O | 9.642249578  | 17.767078472 | 0.010698809  |
| O | 6.426764851  | 18.473867314 | -0.077555212 |
| O | 6.463822546  | 18.473723724 | 6.059764059  |
| O | -0.083022331 | 18.516300741 | 0.029870331  |
| O | 6.494819668  | 18.483878271 | 2.855968041  |
| O | -0.054407096 | 18.539795968 | 5.916029569  |
| O | 6.438306049  | 18.465882338 | 9.024483387  |
| O | -0.042544425 | 18.520555585 | 8.875381689  |
| O | -0.077702119 | 18.537556745 | 2.984895303  |
| O | 2.028413747  | 20.025583487 | 4.470570271  |
| O | 4.442730456  | 20.029045013 | 1.525732952  |
| O | 4.650205105  | 20.034334636 | 4.439512840  |
| O | 2.008648560  | 19.967381205 | 7.391020752  |
| O | 1.976765082  | 19.945750151 | 10.355766934 |
| O | 4.536579992  | 20.000316599 | 7.393091287  |
| O | 4.452331777  | 20.017851043 | 10.364324348 |
| O | 8.305434359  | 20.249978655 | 1.604815720  |
| O | 8.237485140  | 20.070050395 | 4.463141756  |

|   |              |              |              |
|---|--------------|--------------|--------------|
| O | 10.799153421 | 19.993679299 | 1.509392607  |
| O | 10.861618249 | 20.032005759 | 4.486870750  |
| O | 8.327632867  | 20.046850207 | 7.394462456  |
| O | 8.441433329  | 20.052024100 | 10.373909045 |
| O | 10.879307566 | 19.960083461 | 7.397613862  |
| O | 10.929610980 | 19.901648648 | 10.313852177 |
| O | 1.963384670  | 19.951296951 | 1.512031909  |
| O | -0.081847884 | 21.130716043 | 2.968524438  |
| O | -0.050761919 | 21.141858220 | 5.935479087  |
| O | -0.051213540 | 21.122486391 | 8.887713811  |
| O | -0.088961850 | 21.109850090 | 0.012813586  |
| O | 6.438669086  | 21.247915354 | 8.841118081  |
| O | 6.463668110  | 21.125920770 | 0.120105456  |
| H | 0.000000000  | 0.932897449  | 9.814799089  |
| H | 0.816399334  | 0.932897449  | 8.400899272  |
| H | 6.457698847  | 0.932897449  | 6.856699960  |
| H | 0.834099172  | 0.932897449  | -0.439201108 |
| H | 0.000000000  | 0.932897449  | 3.899999089  |
| H | 0.816399334  | 0.932897449  | 2.486099272  |
| H | 6.457698847  | 0.932897449  | 0.941899960  |
| H | 0.834099172  | 0.932897449  | 5.475598892  |
| H | 6.494400000  | 0.932897449  | 9.814799089  |

|   |              |              |              |
|---|--------------|--------------|--------------|
| H | 7.310799334  | 0.932897449  | 8.400899272  |
| H | -0.036701153 | 0.932897449  | 6.856699960  |
| H | 7.328499172  | 0.932897449  | -0.439201108 |
| H | 6.494400000  | 0.932897449  | 3.899999089  |
| H | 7.310799334  | 0.932897449  | 2.486099272  |
| H | -0.036701153 | 0.932897449  | 0.941899960  |
| H | 7.328499172  | 0.932897449  | 5.475598892  |
| H | 7.254606148  | 21.776470445 | 8.784638365  |
| H | 8.230171796  | 21.195070561 | 1.359529793  |

TS9-E2:

|    |             |             |              |
|----|-------------|-------------|--------------|
| Ti | 3.247200000 | 3.247190143 | 1.478700000  |
| Ti | 3.247200000 | 3.247190143 | 4.436100000  |
| Ti | 0.000000000 | 3.247190143 | 2.957400000  |
| Ti | 0.000000000 | 3.247190143 | 0.000000000  |
| Ti | 3.247200000 | 3.247190143 | 7.393500000  |
| Ti | 3.247200000 | 3.247190143 | 10.350900000 |
| Ti | 0.000000000 | 3.247190143 | 8.872200000  |
| Ti | 0.000000000 | 3.247190143 | 5.914800000  |
| Ti | 9.741600000 | 3.247190143 | 1.478700000  |
| Ti | 9.741600000 | 3.247190143 | 4.436100000  |
| Ti | 6.494400000 | 3.247190143 | 2.957400000  |
| Ti | 6.494400000 | 3.247190143 | 0.000000000  |

|    |             |             |              |
|----|-------------|-------------|--------------|
| Ti | 9.741600000 | 3.247190143 | 7.393500000  |
| Ti | 9.741600000 | 3.247190143 | 10.350900000 |
| Ti | 6.494400000 | 3.247190143 | 8.872200000  |
| Ti | 6.494400000 | 3.247190143 | 5.914800000  |
| Ti | 0.000000000 | 6.494389931 | 4.436100000  |
| Ti | 0.000000000 | 6.494389931 | 1.478700000  |
| Ti | 3.247200000 | 6.494389931 | 2.957400000  |
| Ti | 3.247200000 | 6.494389931 | 0.000000000  |
| Ti | 0.000000000 | 6.494389931 | 10.350900000 |
| Ti | 0.000000000 | 6.494389931 | 7.393500000  |
| Ti | 3.247200000 | 6.494389931 | 8.872200000  |
| Ti | 3.247200000 | 6.494389931 | 5.914800000  |
| Ti | 6.494400000 | 6.494389931 | 4.436100000  |
| Ti | 6.494400000 | 6.494389931 | 1.478700000  |
| Ti | 9.741600000 | 6.494389931 | 2.957400000  |
| Ti | 9.741600000 | 6.494389931 | 0.000000000  |
| Ti | 6.494400000 | 6.494389931 | 10.350900000 |
| Ti | 6.494400000 | 6.494389931 | 7.393500000  |
| Ti | 9.741600000 | 6.494389931 | 8.872200000  |
| Ti | 9.741600000 | 6.494389931 | 5.914800000  |
| Ti | 3.224936288 | 9.738128549 | 1.478970188  |
| Ti | 3.226672111 | 9.739556951 | 4.436469793  |

|    |              |              |              |
|----|--------------|--------------|--------------|
| Ti | -0.017848170 | 9.841512833  | 2.960495451  |
| Ti | -0.011633678 | 9.839118591  | 0.001868840  |
| Ti | 3.227046838  | 9.739586955  | 7.393522831  |
| Ti | 3.226537417  | 9.738546461  | 10.350799567 |
| Ti | -0.012103483 | 9.839867975  | 8.871604380  |
| Ti | -0.014486019 | 9.840371255  | 5.914374134  |
| Ti | 9.735662820  | 9.742233731  | 1.481085794  |
| Ti | 9.729237260  | 9.739313348  | 4.436663207  |
| Ti | 6.481398341  | 9.749065342  | 2.960135122  |
| Ti | 6.477660164  | 9.752125386  | 0.005119496  |
| Ti | 9.736901172  | 9.740327767  | 7.394151929  |
| Ti | 9.741518690  | 9.736986614  | 10.353833268 |
| Ti | 6.487793377  | 9.750199419  | 8.883475738  |
| Ti | 6.475177485  | 9.734178031  | 5.924362102  |
| Ti | -0.032464077 | 13.185368879 | 1.515613084  |
| Ti | -0.032757883 | 13.183804745 | 4.473687253  |
| Ti | 3.211282721  | 12.995950445 | 2.957543138  |
| Ti | 3.211038791  | 12.999148008 | 5.915025236  |
| Ti | 6.461781227  | 13.087903943 | 1.448351753  |
| Ti | 6.459299586  | 13.009716895 | 4.422056609  |
| Ti | 9.711336616  | 13.000811798 | 2.962625253  |
| Ti | 9.708487652  | 12.998632940 | 5.918103179  |

|    |              |              |              |
|----|--------------|--------------|--------------|
| Ti | -0.033451875 | 13.186741202 | 7.429226102  |
| Ti | -0.033001943 | 13.180798636 | 10.387203268 |
| Ti | 3.211335845  | 12.996111181 | 8.872549920  |
| Ti | 3.210679651  | 12.996435152 | 0.000362577  |
| Ti | 6.460253744  | 13.018059419 | 7.418145315  |
| Ti | 6.461537297  | 13.103702803 | 10.380756491 |
| Ti | 9.711066319  | 12.996663753 | 8.876742921  |
| Ti | 9.711935139  | 12.999014776 | 0.005690038  |
| Ti | 9.702727119  | 16.328997572 | 1.488955790  |
| Ti | 9.696981783  | 16.330322746 | 4.439653967  |
| Ti | 6.432506030  | 16.287546774 | 2.943671039  |
| Ti | -0.046876190 | 16.657218867 | 5.916855156  |
| Ti | 3.178833581  | 16.319019477 | 1.479132017  |
| Ti | 3.190257750  | 16.328926491 | 4.437304017  |
| Ti | -0.055534134 | 16.650240094 | 2.963381756  |
| Ti | 6.455768581  | 16.269447256 | 5.921057740  |
| Ti | 3.194780710  | 16.328698961 | 7.393706781  |
| Ti | 3.180312876  | 16.317703232 | 10.350879298 |
| Ti | -0.050003503 | 16.648793833 | 8.870663926  |
| Ti | 6.455642070  | 16.453141724 | -0.001989266 |
| Ti | 9.699815940  | 16.323763314 | 7.396368560  |
| Ti | 9.706017962  | 16.321835918 | 10.357117401 |



|    |              |              |              |
|----|--------------|--------------|--------------|
| Ti | 6.441181250  | 16.313885588 | 8.888552411  |
| Ti | -0.049100392 | 16.646889297 | 0.001636743  |
| Ti | 6.449946092  | 19.552114555 | 7.556743275  |
| Ti | 6.429462754  | 19.447645129 | 4.271209453  |
| Ti | 3.221484774  | 19.575020776 | 8.863173897  |
| Ti | 3.130195071  | 19.577614331 | -0.022718747 |
| Ti | 6.245457439  | 19.821059142 | 1.340890483  |
| Ti | -0.038929772 | 20.030688800 | 4.455046406  |
| Ti | 3.178287922  | 19.588994753 | 2.977697464  |
| Ti | 3.249976746  | 19.594657997 | 5.925182603  |
| Ti | -0.086168608 | 20.008686983 | 1.488876295  |
| Ti | 6.426553003  | 19.983494391 | 10.461689409 |
| Ti | 9.758715861  | 19.578227626 | 3.009152016  |
| Ti | 9.630669154  | 19.590188124 | 5.936721313  |
| Ti | -0.044684200 | 20.016358348 | 7.401669995  |
| Ti | -0.076675744 | 20.007711856 | 10.363184448 |
| Ti | 9.697114919  | 19.576960317 | 8.879169645  |
| Ti | 9.620726747  | 19.600950966 | 0.001181304  |
| O  | 0.000000000  | 1.266689833  | 2.957400000  |
| O  | 0.000000000  | 1.266689833  | 0.000000000  |
| O  | 0.000000000  | 1.266689833  | 8.872200000  |
| O  | 0.000000000  | 1.266689833  | 5.914800000  |

|   |             |             |              |
|---|-------------|-------------|--------------|
| O | 6.494400000 | 1.266689833 | 2.957400000  |
| O | 6.494400000 | 1.266689833 | 0.000000000  |
| O | 6.494400000 | 1.266689833 | 8.872200000  |
| O | 6.494400000 | 1.266689833 | 5.914800000  |
| O | 9.741600000 | 1.980499953 | 8.872200000  |
| O | 9.741600000 | 1.980499953 | 5.914800000  |
| O | 9.741600000 | 1.980499953 | 2.957400000  |
| O | 9.741600000 | 1.980499953 | 0.000000000  |
| O | 3.247200000 | 1.980499953 | 8.872200000  |
| O | 3.247200000 | 1.980499953 | 5.914800000  |
| O | 3.247200000 | 1.980499953 | 2.957400000  |
| O | 3.247200000 | 1.980499953 | 0.000000000  |
| O | 1.266699988 | 3.247190143 | 1.478700000  |
| O | 1.266699988 | 3.247190143 | 4.436100000  |
| O | 5.227599998 | 3.247190143 | 1.478700000  |
| O | 5.227599998 | 3.247190143 | 4.436100000  |
| O | 1.266699988 | 3.247190143 | 7.393500000  |
| O | 1.266699988 | 3.247190143 | 10.350900000 |
| O | 5.227599998 | 3.247190143 | 7.393500000  |
| O | 5.227599998 | 3.247190143 | 10.350900000 |
| O | 7.761099988 | 3.247190143 | 1.478700000  |
| O | 7.761099988 | 3.247190143 | 4.436100000  |

|   |              |             |              |
|---|--------------|-------------|--------------|
| O | 11.721999998 | 3.247190143 | 1.478700000  |
| O | 11.721999998 | 3.247190143 | 4.436100000  |
| O | 7.761099988  | 3.247190143 | 7.393500000  |
| O | 7.761099988  | 3.247190143 | 10.350900000 |
| O | 11.721999998 | 3.247190143 | 7.393500000  |
| O | 11.721999998 | 3.247190143 | 10.350900000 |
| O | 9.741600000  | 4.513899978 | 8.872200000  |
| O | 9.741600000  | 4.513899978 | 5.914800000  |
| O | 9.741600000  | 4.513899978 | 2.957400000  |
| O | 9.741600000  | 4.513899978 | 0.000000000  |
| O | 3.247200000  | 4.513899978 | 8.872200000  |
| O | 3.247200000  | 4.513899978 | 5.914800000  |
| O | 3.247200000  | 4.513899978 | 2.957400000  |
| O | 3.247200000  | 4.513899978 | 0.000000000  |
| O | 0.000000000  | 5.227600085 | 2.957400000  |
| O | 0.000000000  | 5.227600085 | 0.000000000  |
| O | 0.000000000  | 5.227600085 | 8.872200000  |
| O | 0.000000000  | 5.227600085 | 5.914800000  |
| O | 6.494400000  | 5.227600085 | 0.000000000  |
| O | 6.494400000  | 5.227600085 | 2.957400000  |
| O | 6.494400000  | 5.227600085 | 8.872200000  |
| O | 6.494400000  | 5.227600085 | 5.914800000  |

|   |              |             |              |
|---|--------------|-------------|--------------|
| O | 8.474900012  | 6.494389931 | 7.393500000  |
| O | 11.008299988 | 6.494389931 | 7.393500000  |
| O | 8.474900012  | 6.494389931 | 10.350900000 |
| O | 11.008299988 | 6.494389931 | 10.350900000 |
| O | 8.474900012  | 6.494389931 | 1.478700000  |
| O | 11.008299988 | 6.494389931 | 1.478700000  |
| O | 8.474900012  | 6.494389931 | 4.436100000  |
| O | 11.008299988 | 6.494389931 | 4.436100000  |
| O | 1.980500012  | 6.494389931 | 1.478700000  |
| O | 4.513899988  | 6.494389931 | 1.478700000  |
| O | 1.980500012  | 6.494389931 | 4.436100000  |
| O | 4.513899988  | 6.494389931 | 4.436100000  |
| O | 1.980500012  | 6.494389931 | 7.393500000  |
| O | 4.513899988  | 6.494389931 | 7.393500000  |
| O | 1.980500012  | 6.494389931 | 10.350900000 |
| O | 4.513899988  | 6.494389931 | 10.350900000 |
| O | 0.000000000  | 7.761090122 | 8.872200000  |
| O | 0.000000000  | 7.761090122 | 5.914800000  |
| O | 6.494400000  | 7.761090122 | 2.957400000  |
| O | 6.494400000  | 7.761090122 | 0.000000000  |
| O | 0.000000000  | 7.761090122 | 2.957400000  |
| O | 0.000000000  | 7.761090122 | 0.000000000  |

|   |              |             |              |
|---|--------------|-------------|--------------|
| O | 6.494400000  | 7.761090122 | 8.872200000  |
| O | 6.494400000  | 7.761090122 | 5.914800000  |
| O | 3.247200000  | 8.474889884 | 2.957400000  |
| O | 3.247200000  | 8.474889884 | 0.000000000  |
| O | 3.247200000  | 8.474889884 | 8.872200000  |
| O | 3.247200000  | 8.474889884 | 5.914800000  |
| O | 9.741600000  | 8.474889884 | 2.957400000  |
| O | 9.741600000  | 8.474889884 | 0.000000000  |
| O | 9.741600000  | 8.474889884 | 8.872200000  |
| O | 9.741600000  | 8.474889884 | 5.914800000  |
| O | 1.267830533  | 9.789790330 | 1.479260841  |
| O | 1.267440480  | 9.788790556 | 4.435156708  |
| O | 5.209413080  | 9.773972183 | 1.480439188  |
| O | 5.209422822  | 9.773614636 | 4.438477750  |
| O | 1.268410743  | 9.789733180 | 7.393090932  |
| O | 1.268692340  | 9.789044875 | 10.350511043 |
| O | 5.210000694  | 9.773733223 | 7.397908655  |
| O | 5.210226958  | 9.773220298 | 10.352398219 |
| O | 7.757911887  | 9.781017393 | 1.479288877  |
| O | 7.756993969  | 9.780911308 | 4.439973484  |
| O | 11.699428451 | 9.785085427 | 1.477120867  |
| O | 11.698778102 | 9.784668944 | 4.436531307  |

|   |              |              |              |
|---|--------------|--------------|--------------|
| O | 7.758620946  | 9.780246935  | 7.394592109  |
| O | 7.759444566  | 9.780261937  | 10.354915794 |
| O | 11.700537175 | 9.782841918  | 7.393460134  |
| O | 11.700925150 | 9.783798472  | 10.350965299 |
| O | 9.721924306  | 11.075430150 | 2.958355713  |
| O | 9.720141983  | 11.077080367 | 0.000348618  |
| O | 3.240851984  | 11.074132480 | 2.958003901  |
| O | 3.241280744  | 11.074498242 | 0.000148698  |
| O | 3.241457262  | 11.074001034 | 8.872656859  |
| O | 3.239956146  | 11.074778993 | 5.914997909  |
| O | 9.722664408  | 11.075305848 | 8.873452400  |
| O | 9.720888189  | 11.075528735 | 5.916600110  |
| O | 6.464556673  | 11.792326033 | 8.882269710  |
| O | -0.028812276 | 11.803952202 | 2.954157980  |
| O | 6.466274962  | 11.797458493 | -0.001664661 |
| O | 6.464703577  | 11.787012836 | 5.919859875  |
| O | -0.027501706 | 11.803765749 | -0.003618083 |
| O | -0.028372345 | 11.803557865 | 5.911220008  |
| O | 6.464349502  | 11.787347523 | 2.952130505  |
| O | -0.028623678 | 11.803781822 | 8.869046938  |
| O | 8.434480425  | 13.103814603 | 1.484754271  |
| O | 8.430477666  | 13.096025724 | 4.438365723  |

|   |              |              |              |
|---|--------------|--------------|--------------|
| O | 10.967716872 | 13.117715356 | 1.481262291  |
| O | 10.966768430 | 13.119393791 | 4.440979473  |
| O | 1.956953266  | 13.103561713 | 1.481598607  |
| O | 1.957303444  | 13.105952384 | 4.436790257  |
| O | 4.490729008  | 13.115013216 | 1.480814068  |
| O | 4.492661871  | 13.108430923 | 4.439486341  |
| O | 1.957251748  | 13.105107987 | 7.394562771  |
| O | 1.957106274  | 13.103323824 | 10.349831787 |
| O | 4.492730972  | 13.109399622 | 7.392020235  |
| O | 4.490170750  | 13.119052675 | 10.351535131 |
| O | 8.431354670  | 13.100252350 | 7.398015477  |
| O | 8.435319891  | 13.107704042 | 10.350521926 |
| O | 10.966548140 | 13.120274263 | 7.393583754  |
| O | 10.967877674 | 13.117742503 | 10.354933302 |
| O | -0.034890644 | 14.419532657 | 2.965030447  |
| O | -0.029154401 | 14.417957807 | 5.922544603  |
| O | -0.034625023 | 14.419706608 | 8.880550396  |
| O | -0.030543943 | 14.419184039 | 0.007940264  |
| O | 6.451705035  | 14.391277519 | 2.971849620  |
| O | 6.465990117  | 14.399554677 | 5.915230834  |
| O | 6.450052600  | 14.404080271 | 8.862329500  |
| O | 6.470867282  | 14.414690950 | 0.002355983  |

|   |              |              |              |
|---|--------------|--------------|--------------|
| O | 9.703959497  | 15.125043474 | 8.877144300  |
| O | 3.204260326  | 15.121079382 | 8.864838203  |
| O | 9.681101417  | 15.124180146 | 5.917266472  |
| O | 9.694519756  | 15.121049378 | 2.966860249  |
| O | 3.204007694  | 15.123400044 | 2.963846067  |
| O | 9.700028047  | 15.127359849 | 0.006781673  |
| O | 3.181396012  | 15.118181502 | 0.002675737  |
| O | 3.201900391  | 15.125945021 | 5.916708469  |
| O | 1.237261003  | 16.484975902 | 10.349843025 |
| O | 5.171973514  | 16.466903530 | 4.452960965  |
| O | 5.172522161  | 16.469837844 | 7.387647424  |
| O | 7.725729667  | 16.421993707 | 1.487142786  |
| O | 7.717169269  | 16.483050292 | 4.426663528  |
| O | 5.162224770  | 16.431182056 | 10.362447701 |
| O | 11.651003217 | 16.485656706 | 1.479036434  |
| O | 11.651466787 | 16.478107144 | 4.447185163  |
| O | 1.240256480  | 16.488838552 | 4.436600984  |
| O | 1.237310230  | 16.495587295 | 1.490890994  |
| O | 5.157374752  | 16.416093647 | 1.459678713  |
| O | 7.726749548  | 16.448970462 | 7.406749743  |
| O | 7.731837521  | 16.419279422 | 10.342188919 |
| O | 1.243012444  | 16.492699059 | 7.395532325  |



|   |              |              |              |
|---|--------------|--------------|--------------|
| O | 11.654549419 | 16.481079319 | 7.391718462  |
| O | 11.650423917 | 16.494256049 | 10.359011202 |
| O | 3.224592994  | 17.752590856 | 8.873651610  |
| O | 3.221131998  | 17.757283972 | 0.000965532  |
| O | 9.671367610  | 17.753696001 | 2.966503114  |
| O | 9.660873309  | 17.765075709 | 5.923863603  |
| O | 3.231914780  | 17.766570548 | 2.966980320  |
| O | 3.232522396  | 17.773056757 | 5.907210957  |
| O | 9.662497429  | 17.756010948 | 8.875872144  |
| O | 9.619449168  | 17.778914311 | 0.016842748  |
| O | 6.510923442  | 18.501040167 | -0.035812340 |
| O | 6.524074472  | 18.560733002 | 5.956269491  |
| O | -0.045250381 | 18.520568444 | 0.006855371  |
| O | 6.363226498  | 18.405732300 | 2.812428015  |
| O | -0.041690801 | 18.535665426 | 5.915410289  |
| O | 6.449327695  | 18.461332097 | 8.971541432  |
| O | -0.057002128 | 18.524611832 | 8.870413376  |
| O | -0.078674980 | 18.529441037 | 2.983402762  |
| O | 2.024722849  | 20.010554014 | 4.453148583  |
| O | 4.387761075  | 20.087749861 | 1.488564230  |
| O | 4.593808644  | 20.043482622 | 4.422975532  |
| O | 2.016929050  | 19.974950412 | 7.380817486  |

|   |              |              |              |
|---|--------------|--------------|--------------|
| O | 1.967254683  | 19.947107115 | 10.328577190 |
| O | 4.537669492  | 19.963628212 | 7.379523328  |
| O | 4.454337508  | 19.975142223 | 10.353830902 |
| O | 8.394547268  | 20.175154548 | 1.708118649  |
| O | 8.339637896  | 19.994588347 | 4.422697300  |
| O | 10.884068091 | 19.945043273 | 1.466577026  |
| O | 10.887454661 | 20.012143866 | 4.501148841  |
| O | 8.376948354  | 20.037573275 | 7.401207812  |
| O | 8.427479851  | 20.060565579 | 10.326246286 |
| O | 10.883650371 | 19.964247579 | 7.391792870  |
| O | 10.888048119 | 19.922313146 | 10.400437160 |
| O | 1.958130960  | 19.914251731 | 1.501208890  |
| O | -0.063905675 | 21.127551342 | 2.967574047  |
| O | -0.036002616 | 21.139242519 | 5.931668655  |
| O | -0.074314510 | 21.122213498 | 8.882922941  |
| O | -0.049705930 | 21.121745580 | 0.009405478  |
| O | 6.436396565  | 21.177982247 | 8.793686708  |
| O | 6.451096770  | 21.147270358 | 0.039959797  |
| H | 0.000000000  | 0.932899949  | 9.814800036  |
| H | 0.816399984  | 0.932899949  | 8.400899982  |
| H | 6.457700016  | 0.932899949  | 6.856699960  |
| H | 0.834099951  | 0.932899949  | -0.439200043 |

|   |              |              |              |
|---|--------------|--------------|--------------|
| H | 0.000000000  | 0.932899949  | 3.900000036  |
| H | 0.816399984  | 0.932899949  | 2.486099982  |
| H | 6.457700016  | 0.932899949  | 0.941899960  |
| H | 0.834099951  | 0.932899949  | 5.475599957  |
| H | 6.494400000  | 0.932899949  | 9.814800036  |
| H | 7.310799984  | 0.932899949  | 8.400899982  |
| H | -0.036699984 | 0.932899949  | 6.856699960  |
| H | 7.328499951  | 0.932899949  | -0.439200043 |
| H | 6.494400000  | 0.932899949  | 3.900000036  |
| H | 7.310799984  | 0.932899949  | 2.486099982  |
| H | -0.036699984 | 0.932899949  | 0.941899960  |
| H | 7.328499951  | 0.932899949  | 5.475599957  |
| H | 7.265397893  | 21.690390932 | 8.759034616  |
| H | 7.592228053  | 20.527723682 | 2.483161509  |

9-Ec:

|    |             |             |              |
|----|-------------|-------------|--------------|
| Ti | 3.247200000 | 3.247194072 | 1.478700000  |
| Ti | 3.247200000 | 3.247194072 | 4.436100000  |
| Ti | 0.000000000 | 3.247194072 | 2.957400000  |
| Ti | 0.000000000 | 3.247194072 | 0.000000000  |
| Ti | 3.247200000 | 3.247194072 | 7.393500000  |
| Ti | 3.247200000 | 3.247194072 | 10.350900000 |
| Ti | 0.000000000 | 3.247194072 | 8.872200000  |

|    |             |             |              |
|----|-------------|-------------|--------------|
| Ti | 0.000000000 | 3.247194072 | 5.914800000  |
| Ti | 9.741600000 | 3.247194072 | 1.478700000  |
| Ti | 9.741600000 | 3.247194072 | 4.436100000  |
| Ti | 6.494400000 | 3.247194072 | 2.957400000  |
| Ti | 6.494400000 | 3.247194072 | 0.000000000  |
| Ti | 9.741600000 | 3.247194072 | 7.393500000  |
| Ti | 9.741600000 | 3.247194072 | 10.350900000 |
| Ti | 6.494400000 | 3.247194072 | 8.872200000  |
| Ti | 6.494400000 | 3.247194072 | 5.914800000  |
| Ti | 0.000000000 | 6.494391717 | 4.436100000  |
| Ti | 0.000000000 | 6.494391717 | 1.478700000  |
| Ti | 3.247200000 | 6.494391717 | 2.957400000  |
| Ti | 3.247200000 | 6.494391717 | 0.000000000  |
| Ti | 0.000000000 | 6.494391717 | 10.350900000 |
| Ti | 0.000000000 | 6.494391717 | 7.393500000  |
| Ti | 3.247200000 | 6.494391717 | 8.872200000  |
| Ti | 3.247200000 | 6.494391717 | 5.914800000  |
| Ti | 6.494400000 | 6.494391717 | 4.436100000  |
| Ti | 6.494400000 | 6.494391717 | 1.478700000  |
| Ti | 9.741600000 | 6.494391717 | 2.957400000  |
| Ti | 9.741600000 | 6.494391717 | 0.000000000  |
| Ti | 6.494400000 | 6.494391717 | 10.350900000 |

|    |              |              |              |
|----|--------------|--------------|--------------|
| Ti | 6.494400000  | 6.494391717  | 7.393500000  |
| Ti | 9.741600000  | 6.494391717  | 8.872200000  |
| Ti | 9.741600000  | 6.494391717  | 5.914800000  |
| Ti | 3.226305307  | 9.738266425  | 1.479027917  |
| Ti | 3.229350401  | 9.738664691  | 4.436952441  |
| Ti | -0.015738919 | 9.837430869  | 2.962970559  |
| Ti | -0.011980869 | 9.837637325  | 0.004489570  |
| Ti | 3.231766968  | 9.738162840  | 7.394033278  |
| Ti | 3.228741227  | 9.738710054  | 10.351519280 |
| Ti | -0.010265049 | 9.837541241  | 8.874741944  |
| Ti | -0.011989961 | 9.837491949  | 5.917990207  |
| Ti | 9.737340843  | 9.740063446  | 1.481990167  |
| Ti | 9.734019347  | 9.738917581  | 4.438712094  |
| Ti | 6.479126470  | 9.745502374  | 2.968614224  |
| Ti | 6.482527717  | 9.748391325  | 0.014104905  |
| Ti | 9.740453868  | 9.737999247  | 7.396984409  |
| Ti | 9.741533367  | 9.737845655  | 10.355740081 |
| Ti | 6.485526701  | 9.748110574  | 8.890097238  |
| Ti | 6.483984541  | 9.734050514  | 5.931181985  |
| Ti | -0.032388092 | 13.178145074 | 1.517697578  |
| Ti | -0.031920236 | 13.179708850 | 4.475161694  |
| Ti | 3.212254413  | 12.994484896 | 2.961099471  |

|    |              |              |              |
|----|--------------|--------------|--------------|
| Ti | 3.212219083  | 12.996905928 | 5.918884169  |
| Ti | 6.461728232  | 13.079353535 | 1.466929075  |
| Ti | 6.460424287  | 13.009932638 | 4.434840621  |
| Ti | 9.711959299  | 12.998155020 | 2.966460646  |
| Ti | 9.710031501  | 12.997129886 | 5.923191208  |
| Ti | -0.034086118 | 13.178571915 | 7.431948093  |
| Ti | -0.034570600 | 13.178485833 | 10.389746159 |
| Ti | 3.209971372  | 12.994915309 | 8.875440956  |
| Ti | 3.209581058  | 12.996651966 | 0.002890799  |
| Ti | 6.460949294  | 13.023731234 | 7.423857948  |
| Ti | 6.459090467  | 13.085197517 | 10.386269203 |
| Ti | 9.709414403  | 12.994282369 | 8.881012934  |
| Ti | 9.711992290  | 12.998282894 | 0.008677840  |
| Ti | 9.695936185  | 16.324402326 | 1.494722483  |
| Ti | 9.690002641  | 16.325684280 | 4.450177934  |
| Ti | 6.441032398  | 16.289006966 | 2.959341356  |
| Ti | -0.061582499 | 16.642766971 | 5.937241106  |
| Ti | 3.171917045  | 16.319184855 | 1.493584121  |
| Ti | 3.181115583  | 16.323533640 | 4.448980778  |
| Ti | -0.060271929 | 16.640976736 | 2.984475825  |
| Ti | 6.437108092  | 16.274430052 | 5.935885079  |
| Ti | 3.174113971  | 16.321434436 | 7.407079080  |

|    |              |              |              |
|----|--------------|--------------|--------------|
| Ti | 3.163193637  | 16.316905270 | 10.365367246 |
| Ti | -0.067132223 | 16.637134445 | 8.889904889  |
| Ti | 6.434642947  | 16.409124518 | 0.014803798  |
| Ti | 9.681908021  | 16.320497885 | 7.408441376  |
| Ti | 9.692715482  | 16.316238397 | 10.367017830 |
| Ti | 6.426973710  | 16.309560735 | 8.904314170  |
| Ti | -0.062397676 | 16.638663575 | 0.023611763  |
| Ti | 6.421696751  | 19.551189077 | 7.583011493  |
| Ti | 6.408472723  | 19.956350828 | 10.485729995 |
| Ti | 3.186420339  | 19.574034575 | 8.890480991  |
| Ti | 3.186713886  | 19.575468692 | 0.025380762  |
| Ti | 6.428637446  | 19.882246102 | 1.388564008  |
| Ti | 6.427918516  | 19.459720285 | 4.294114280  |
| Ti | 3.198738138  | 19.579375276 | 2.979799939  |
| Ti | 3.217631127  | 19.578275846 | 5.934146246  |
| Ti | -0.076385834 | 20.001163139 | 1.498282010  |
| Ti | -0.070436184 | 20.010320769 | 4.455596245  |
| Ti | 9.656376846  | 19.582545335 | 2.982688846  |
| Ti | 9.631446793  | 19.582065987 | 5.934883703  |
| Ti | -0.070888714 | 20.006354892 | 7.408506202  |
| Ti | -0.070954827 | 19.998918916 | 10.370574399 |
| Ti | 9.675399463  | 19.569122859 | 8.893869225  |

|    |             |              |             |
|----|-------------|--------------|-------------|
| Ti | 9.650498505 | 19.578031171 | 0.023017681 |
| O  | 0.000000000 | 1.266694833  | 2.957400000 |
| O  | 0.000000000 | 1.266694833  | 0.000000000 |
| O  | 0.000000000 | 1.266694833  | 8.872200000 |
| O  | 0.000000000 | 1.266694833  | 5.914800000 |
| O  | 6.494400000 | 1.266694833  | 2.957400000 |
| O  | 6.494400000 | 1.266694833  | 0.000000000 |
| O  | 6.494400000 | 1.266694833  | 8.872200000 |
| O  | 6.494400000 | 1.266694833  | 5.914800000 |
| O  | 9.741600000 | 1.980495667  | 8.872200000 |
| O  | 9.741600000 | 1.980495667  | 5.914800000 |
| O  | 9.741600000 | 1.980495667  | 2.957400000 |
| O  | 9.741600000 | 1.980495667  | 0.000000000 |
| O  | 3.247200000 | 1.980495667  | 8.872200000 |
| O  | 3.247200000 | 1.980495667  | 5.914800000 |
| O  | 3.247200000 | 1.980495667  | 2.957400000 |
| O  | 3.247200000 | 1.980495667  | 0.000000000 |
| O  | 1.266698949 | 3.247194072  | 1.478700000 |
| O  | 1.266698949 | 3.247194072  | 4.436100000 |
| O  | 5.227599738 | 3.247194072  | 1.478700000 |
| O  | 5.227599738 | 3.247194072  | 4.436100000 |
| O  | 1.266698949 | 3.247194072  | 7.393500000 |



|   |              |             |              |
|---|--------------|-------------|--------------|
| O | 1.266698949  | 3.247194072 | 10.350900000 |
| O | 5.227599738  | 3.247194072 | 7.393500000  |
| O | 5.227599738  | 3.247194072 | 10.350900000 |
| O | 7.761098949  | 3.247194072 | 1.478700000  |
| O | 7.761098949  | 3.247194072 | 4.436100000  |
| O | 11.721999738 | 3.247194072 | 1.478700000  |
| O | 11.721999738 | 3.247194072 | 4.436100000  |
| O | 7.761098949  | 3.247194072 | 7.393500000  |
| O | 7.761098949  | 3.247194072 | 10.350900000 |
| O | 11.721999738 | 3.247194072 | 7.393500000  |
| O | 11.721999738 | 3.247194072 | 10.350900000 |
| O | 9.741600000  | 4.513896049 | 8.872200000  |
| O | 9.741600000  | 4.513896049 | 5.914800000  |
| O | 9.741600000  | 4.513896049 | 2.957400000  |
| O | 9.741600000  | 4.513896049 | 0.000000000  |
| O | 3.247200000  | 4.513896049 | 8.872200000  |
| O | 3.247200000  | 4.513896049 | 5.914800000  |
| O | 3.247200000  | 4.513896049 | 2.957400000  |
| O | 3.247200000  | 4.513896049 | 0.000000000  |
| O | 0.000000000  | 5.227596870 | 2.957400000  |
| O | 0.000000000  | 5.227596870 | 0.000000000  |
| O | 0.000000000  | 5.227596870 | 8.872200000  |

|   |              |             |              |
|---|--------------|-------------|--------------|
| O | 0.000000000  | 5.227596870 | 5.914800000  |
| O | 6.494400000  | 5.227596870 | 0.000000000  |
| O | 6.494400000  | 5.227596870 | 2.957400000  |
| O | 6.494400000  | 5.227596870 | 8.872200000  |
| O | 6.494400000  | 5.227596870 | 5.914800000  |
| O | 8.474899752  | 6.494391717 | 7.393500000  |
| O | 11.008298949 | 6.494391717 | 7.393500000  |
| O | 8.474899752  | 6.494391717 | 10.350900000 |
| O | 11.008298949 | 6.494391717 | 10.350900000 |
| O | 8.474899752  | 6.494391717 | 1.478700000  |
| O | 11.008298949 | 6.494391717 | 1.478700000  |
| O | 8.474899752  | 6.494391717 | 4.436100000  |
| O | 11.008298949 | 6.494391717 | 4.436100000  |
| O | 1.980499752  | 6.494391717 | 1.478700000  |
| O | 4.513898949  | 6.494391717 | 1.478700000  |
| O | 1.980499752  | 6.494391717 | 4.436100000  |
| O | 4.513898949  | 6.494391717 | 4.436100000  |
| O | 1.980499752  | 6.494391717 | 7.393500000  |
| O | 4.513898949  | 6.494391717 | 7.393500000  |
| O | 1.980499752  | 6.494391717 | 10.350900000 |
| O | 4.513898949  | 6.494391717 | 10.350900000 |
| O | 0.000000000  | 7.761086550 | 8.872200000  |

|   |             |             |              |
|---|-------------|-------------|--------------|
| O | 0.000000000 | 7.761086550 | 5.914800000  |
| O | 6.494400000 | 7.761086550 | 2.957400000  |
| O | 6.494400000 | 7.761086550 | 0.000000000  |
| O | 0.000000000 | 7.761086550 | 2.957400000  |
| O | 0.000000000 | 7.761086550 | 0.000000000  |
| O | 6.494400000 | 7.761086550 | 8.872200000  |
| O | 6.494400000 | 7.761086550 | 5.914800000  |
| O | 3.247200000 | 8.474887384 | 2.957400000  |
| O | 3.247200000 | 8.474887384 | 0.000000000  |
| O | 3.247200000 | 8.474887384 | 8.872200000  |
| O | 3.247200000 | 8.474887384 | 5.914800000  |
| O | 9.741600000 | 8.474887384 | 2.957400000  |
| O | 9.741600000 | 8.474887384 | 0.000000000  |
| O | 9.741600000 | 8.474887384 | 8.872200000  |
| O | 9.741600000 | 8.474887384 | 5.914800000  |
| O | 1.268972768 | 9.790654729 | 1.482268281  |
| O | 1.269077588 | 9.789834265 | 4.438231576  |
| O | 5.210310217 | 9.770291342 | 1.484972882  |
| O | 5.210909130 | 9.771752963 | 4.444703195  |
| O | 1.269897701 | 9.789434212 | 7.396163080  |
| O | 1.269629093 | 9.790298968 | 10.354135396 |
| O | 5.212054093 | 9.771125380 | 7.401122284  |

|   |              |              |              |
|---|--------------|--------------|--------------|
| O | 5.211434138  | 9.770705682  | 10.358511520 |
| O | 7.759249604  | 9.780515899  | 1.486044171  |
| O | 7.759061266  | 9.781787137  | 4.443185221  |
| O | 11.700912421 | 9.779949753  | 1.480766513  |
| O | 11.700697846 | 9.779511838  | 4.439841229  |
| O | 7.760385085  | 9.781003820  | 7.400625086  |
| O | 7.760234285  | 9.780677348  | 10.358968379 |
| O | 11.702048941 | 9.779565417  | 7.396801523  |
| O | 11.702013612 | 9.780439817  | 10.353597977 |
| O | 9.725430762  | 11.074472882 | 2.961456606  |
| O | 9.723968873  | 11.074112477 | 0.003960905  |
| O | 3.244586134  | 11.073416314 | 2.960600735  |
| O | 3.244206211  | 11.073864588 | 0.003126800  |
| O | 3.243879413  | 11.072805163 | 8.875252037  |
| O | 3.243088785  | 11.073724926 | 5.918280150  |
| O | 9.725415176  | 11.072577633 | 8.876010787  |
| O | 9.725511293  | 11.073739928 | 5.919096038  |
| O | 6.459933830  | 11.789763911 | 8.890122554  |
| O | -0.032520838 | 11.800438169 | 2.960168008  |
| O | 6.461264142  | 11.793737647 | 0.009460841  |
| O | 6.460813821  | 11.785196883 | 5.929677142  |
| O | -0.031652017 | 11.801019674 | 0.002626171  |

|   |              |              |              |
|---|--------------|--------------|--------------|
| O | -0.031030243 | 11.800598548 | 5.918191783  |
| O | 6.459084622  | 11.784878270 | 2.959686543  |
| O | -0.031231570 | 11.801026461 | 8.874648372  |
| O | 8.431689911  | 13.095757474 | 1.489661426  |
| O | 8.429513508  | 13.088430084 | 4.445803703  |
| O | 10.966249268 | 13.117431033 | 1.487928508  |
| O | 10.965572681 | 13.120373205 | 4.445960090  |
| O | 1.955580350  | 13.096610800 | 1.487277288  |
| O | 1.956443975  | 13.099313655 | 4.443678042  |
| O | 4.489915779  | 13.119792415 | 1.487826536  |
| O | 4.492400407  | 13.110686576 | 4.445154139  |
| O | 1.955864674  | 13.099401881 | 7.399663931  |
| O | 1.954602553  | 13.095732828 | 10.357272487 |
| O | 4.491631600  | 13.111982104 | 7.401871335  |
| O | 4.488590532  | 13.119312352 | 10.357832737 |
| O | 8.429085916  | 13.091345824 | 7.402923696  |
| O | 8.431550152  | 13.096360053 | 10.359029183 |
| O | 10.964854011 | 13.119943149 | 7.401545548  |
| O | 10.965729976 | 13.116964186 | 10.359297005 |
| O | -0.033968829 | 14.413080738 | 2.971789644  |
| O | -0.033539809 | 14.412268489 | 5.929566298  |
| O | -0.034702697 | 14.413492221 | 8.887261683  |

|   |              |              |              |
|---|--------------|--------------|--------------|
| O | -0.033419013 | 14.413903346 | 0.014744768  |
| O | 6.460994235  | 14.392317299 | 2.982025087  |
| O | 6.460009424  | 14.399555392 | 5.925319827  |
| O | 6.456893151  | 14.402506493 | 8.876730027  |
| O | 6.461308824  | 14.419521941 | 0.012010475  |
| O | 9.678829546  | 15.115929420 | 8.885511021  |
| O | 3.187429049  | 15.117294600 | 8.884570331  |
| O | 9.671452946  | 15.119903513 | 5.928330223  |
| O | 9.676795370  | 15.119812430 | 2.976196406  |
| O | 3.191626900  | 15.118262227 | 2.976486586  |
| O | 9.687866633  | 15.116276966 | 0.017558084  |
| O | 3.175603137  | 15.115428283 | 0.015712548  |
| O | 3.195987759  | 15.119342368 | 5.927984444  |
| O | 1.225433142  | 16.484484052 | 10.368190380 |
| O | 5.164649779  | 16.466383462 | 4.456978534  |
| O | 5.157306821  | 16.453843602 | 7.411243099  |
| O | 7.719281378  | 16.432909068 | 1.488278072  |
| O | 7.710384569  | 16.476498004 | 4.454106662  |
| O | 5.149658236  | 16.427427992 | 10.374266417 |
| O | 11.642782216 | 16.472738225 | 1.500654436  |
| O | 11.641959635 | 16.466435969 | 4.457640755  |
| O | 1.229716199  | 16.479843800 | 4.456098175  |

|   |              |              |              |
|---|--------------|--------------|--------------|
| O | 1.227935045  | 16.486242497 | 1.500698088  |
| O | 5.153781141  | 16.414989216 | 1.488008357  |
| O | 7.710528875  | 16.461816791 | 7.416535307  |
| O | 7.716314995  | 16.441173010 | 10.369895262 |
| O | 1.227262614  | 16.479985247 | 7.411311947  |
| O | 11.640411500 | 16.467673274 | 7.409410930  |
| O | 11.640897671 | 16.471700946 | 10.370836661 |
| O | 3.206513104  | 17.749267563 | 8.889321572  |
| O | 3.220240577  | 17.751243894 | 0.020568362  |
| O | 9.656213187  | 17.754905446 | 2.978155033  |
| O | 9.655992508  | 17.758318037 | 5.933937454  |
| O | 3.218514235  | 17.752709086 | 2.977781928  |
| O | 3.209149440  | 17.755073325 | 5.930980527  |
| O | 9.657421665  | 17.746621501 | 8.889596846  |
| O | 9.645718367  | 17.753471686 | 0.017765457  |
| O | 6.431507451  | 18.540514276 | 0.010393605  |
| O | 6.452359021  | 18.566509831 | 5.978351450  |
| O | -0.069618020 | 18.511771932 | 0.024557185  |
| O | 6.427204132  | 18.409832123 | 2.850607458  |
| O | -0.067349786 | 18.521373193 | 5.933198813  |
| O | 6.422514915  | 18.455438824 | 8.993257384  |
| O | -0.070830654 | 18.513901855 | 8.884673722  |

|   |              |              |              |
|---|--------------|--------------|--------------|
| O | -0.072438018 | 18.518185988 | 2.994617223  |
| O | 2.005010916  | 19.979827838 | 4.464235166  |
| O | 4.449303698  | 20.011048722 | 1.525740286  |
| O | 4.541541194  | 19.974209958 | 4.468239604  |
| O | 1.993272159  | 19.964798366 | 7.402045348  |
| O | 1.968619676  | 19.932611284 | 10.373642524 |
| O | 4.503343731  | 19.956257959 | 7.406678293  |
| O | 4.442454444  | 19.983655484 | 10.353655232 |
| O | 8.402736447  | 20.012006705 | 1.531447003  |
| O | 8.318698781  | 19.981959547 | 4.462680520  |
| O | 10.877264947 | 19.938856746 | 1.501152936  |
| O | 10.849577112 | 19.986019008 | 4.468293547  |
| O | 8.357859234  | 20.005411196 | 7.410505641  |
| O | 8.413487017  | 20.014113053 | 10.346427347 |
| O | 10.861888027 | 19.965897439 | 7.401257970  |
| O | 10.883670244 | 19.933466753 | 10.375688572 |
| O | 1.968827237  | 19.925112800 | 1.507007641  |
| O | -0.068837653 | 21.116742066 | 2.978573210  |
| O | -0.066300290 | 21.120614717 | 5.935021991  |
| O | -0.069401107 | 21.111487447 | 8.891831339  |
| O | -0.066404980 | 21.111337428 | 0.021426126  |
| O | 6.422129018  | 21.167865919 | 8.813231692  |



|   |              |              |              |
|---|--------------|--------------|--------------|
| O | 6.427874224  | 21.156203674 | 0.046996871  |
| H | 0.000000000  | 0.932897449  | 9.814799089  |
| H | 0.816399334  | 0.932897449  | 8.400899272  |
| H | 6.457698847  | 0.932897449  | 6.856699960  |
| H | 0.834099172  | 0.932897449  | -0.439201108 |
| H | 0.000000000  | 0.932897449  | 3.899999089  |
| H | 0.816399334  | 0.932897449  | 2.486099272  |
| H | 6.457698847  | 0.932897449  | 0.941899960  |
| H | 0.834099172  | 0.932897449  | 5.475598892  |
| H | 6.494400000  | 0.932897449  | 9.814799089  |
| H | 7.310799334  | 0.932897449  | 8.400899272  |
| H | -0.036701153 | 0.932897449  | 6.856699960  |
| H | 7.328499172  | 0.932897449  | -0.439201108 |
| H | 6.494400000  | 0.932897449  | 3.899999089  |
| H | 7.310799334  | 0.932897449  | 2.486099272  |
| H | -0.036701153 | 0.932897449  | 0.941899960  |
| H | 7.328499172  | 0.932897449  | 5.475598892  |
| H | 7.252804342  | 21.679106237 | 8.775525788  |
| H | 6.430062577  | 20.830786675 | 3.051096110  |

TS9-E3:

|    |             |             |             |
|----|-------------|-------------|-------------|
| Ti | 3.247200000 | 3.247190143 | 1.478700000 |
| Ti | 3.247200000 | 3.247190143 | 4.436100000 |

|    |             |             |              |
|----|-------------|-------------|--------------|
| Ti | 0.000000000 | 3.247190143 | 2.957400000  |
| Ti | 0.000000000 | 3.247190143 | 0.000000000  |
| Ti | 3.247200000 | 3.247190143 | 7.393500000  |
| Ti | 3.247200000 | 3.247190143 | 10.350900000 |
| Ti | 0.000000000 | 3.247190143 | 8.872200000  |
| Ti | 0.000000000 | 3.247190143 | 5.914800000  |
| Ti | 9.741600000 | 3.247190143 | 1.478700000  |
| Ti | 9.741600000 | 3.247190143 | 4.436100000  |
| Ti | 6.494400000 | 3.247190143 | 2.957400000  |
| Ti | 6.494400000 | 3.247190143 | 0.000000000  |
| Ti | 9.741600000 | 3.247190143 | 7.393500000  |
| Ti | 9.741600000 | 3.247190143 | 10.350900000 |
| Ti | 6.494400000 | 3.247190143 | 8.872200000  |
| Ti | 6.494400000 | 3.247190143 | 5.914800000  |
| Ti | 0.000000000 | 6.494389931 | 4.436100000  |
| Ti | 0.000000000 | 6.494389931 | 1.478700000  |
| Ti | 3.247200000 | 6.494389931 | 2.957400000  |
| Ti | 3.247200000 | 6.494389931 | 0.000000000  |
| Ti | 0.000000000 | 6.494389931 | 10.350900000 |
| Ti | 0.000000000 | 6.494389931 | 7.393500000  |
| Ti | 3.247200000 | 6.494389931 | 8.872200000  |
| Ti | 3.247200000 | 6.494389931 | 5.914800000  |

|    |              |             |              |
|----|--------------|-------------|--------------|
| Ti | 6.494400000  | 6.494389931 | 4.436100000  |
| Ti | 6.494400000  | 6.494389931 | 1.478700000  |
| Ti | 9.741600000  | 6.494389931 | 2.957400000  |
| Ti | 9.741600000  | 6.494389931 | 0.000000000  |
| Ti | 6.494400000  | 6.494389931 | 10.350900000 |
| Ti | 6.494400000  | 6.494389931 | 7.393500000  |
| Ti | 9.741600000  | 6.494389931 | 8.872200000  |
| Ti | 9.741600000  | 6.494389931 | 5.914800000  |
| Ti | 3.227668222  | 9.739963790 | 1.478279458  |
| Ti | 3.230292999  | 9.738938298 | 4.436014472  |
| Ti | -0.011977882 | 9.837452300 | 2.957396451  |
| Ti | -0.011835784 | 9.837271920 | 0.000333003  |
| Ti | 3.231473291  | 9.738522887 | 7.393895227  |
| Ti | 3.227514564  | 9.740427422 | 10.351202483 |
| Ti | -0.010172179 | 9.837501235 | 8.871391920  |
| Ti | -0.008189958 | 9.837887000 | 5.914500475  |
| Ti | 9.737565938  | 9.739386214 | 1.481621083  |
| Ti | 9.739858981  | 9.741093939 | 4.438363239  |
| Ti | 6.482856724  | 9.738514671 | 2.959681812  |
| Ti | 6.481664611  | 9.742414469 | 0.001783667  |
| Ti | 9.741099671  | 9.739008308 | 7.395875857  |
| Ti | 9.740246177  | 9.740164888 | 10.353776249 |

|    |              |              |              |
|----|--------------|--------------|--------------|
| Ti | 6.484789717  | 9.740397061  | 8.876965791  |
| Ti | 6.484875443  | 9.739914498  | 5.918470015  |
| Ti | -0.028253887 | 13.183028572 | 1.515275112  |
| Ti | -0.029518347 | 13.176588798 | 4.472276100  |
| Ti | 3.215645529  | 12.997981426 | 2.961356765  |
| Ti | 3.214825156  | 12.997019157 | 5.918192374  |
| Ti | 6.464059462  | 13.042249379 | 1.468157934  |
| Ti | 6.463817481  | 13.037306231 | 4.433913180  |
| Ti | 9.713713306  | 12.999032278 | 2.965161874  |
| Ti | 9.714028804  | 12.998185024 | 5.921857776  |
| Ti | -0.029577965 | 13.183365045 | 7.429791083  |
| Ti | -0.028551201 | 13.175961216 | 10.387020856 |
| Ti | 3.215464725  | 12.998583648 | 8.875513234  |
| Ti | 3.214901530  | 13.000258868 | 0.002962960  |
| Ti | 6.464473675  | 13.038234924 | 7.406512442  |
| Ti | 6.467251330  | 13.067852740 | 10.350080918 |
| Ti | 9.716002842  | 12.998406482 | 8.880404656  |
| Ti | 9.716271450  | 12.998680446 | 0.009135763  |
| Ti | 9.712733691  | 16.327050531 | 1.479904963  |
| Ti | 9.712282590  | 16.328738609 | 4.436055284  |
| Ti | 6.454405926  | 16.308881003 | 2.948118614  |
| Ti | -0.037104845 | 16.643629941 | 5.914847318  |

|    |              |              |              |
|----|--------------|--------------|--------------|
| Ti | 3.199400696  | 16.324285525 | 1.478446610  |
| Ti | 3.201143014  | 16.327770268 | 4.436244558  |
| Ti | -0.038160965 | 16.643497781 | 2.958444435  |
| Ti | 6.463490163  | 16.293021421 | 5.922322916  |
| Ti | 3.198965831  | 16.320957588 | 7.391916253  |
| Ti | 3.189980569  | 16.325517472 | 10.349807063 |
| Ti | -0.039127201 | 16.641096751 | 8.869895476  |
| Ti | 6.459239448  | 16.320260354 | -0.011884489 |
| Ti | 9.713926063  | 16.322099524 | 7.392194840  |
| Ti | 9.720504240  | 16.323060721 | 10.351508041 |
| Ti | 6.450995587  | 16.326925157 | 8.882393211  |
| Ti | -0.039392822 | 16.642080809 | 0.002968520  |
| Ti | 6.445367150  | 19.611873113 | 7.568855484  |
| Ti | 6.463653562  | 19.542869056 | 4.432963263  |
| Ti | 3.211091526  | 19.577926872 | 8.868975961  |
| Ti | 3.223740798  | 19.583672269 | 0.004537716  |
| Ti | 6.468116254  | 19.684366914 | 1.277271723  |
| Ti | 3.234021693  | 19.571784994 | 2.957460922  |
| Ti | 6.440584284  | 20.074103070 | 10.419104742 |
| Ti | 3.224132281  | 19.574212456 | 5.906812063  |
| Ti | -0.034965590 | 20.007407887 | 1.476063064  |
| Ti | -0.031892180 | 20.012762161 | 4.436035529  |

|    |              |              |              |
|----|--------------|--------------|--------------|
| Ti | 9.701458373  | 19.574928264 | 2.958295737  |
| Ti | 9.679689534  | 19.580479350 | 5.910386376  |
| Ti | -0.036541261 | 20.009674256 | 7.392339516  |
| Ti | -0.035972741 | 20.001820011 | 10.350591721 |
| Ti | 9.702910911  | 19.575465478 | 8.870477847  |
| Ti | 9.681805670  | 19.587267741 | -0.002068760 |
| O  | 0.000000000  | 1.266689833  | 2.957400000  |
| O  | 0.000000000  | 1.266689833  | 0.000000000  |
| O  | 0.000000000  | 1.266689833  | 8.872200000  |
| O  | 0.000000000  | 1.266689833  | 5.914800000  |
| O  | 6.494400000  | 1.266689833  | 2.957400000  |
| O  | 6.494400000  | 1.266689833  | 0.000000000  |
| O  | 6.494400000  | 1.266689833  | 8.872200000  |
| O  | 6.494400000  | 1.266689833  | 5.914800000  |
| O  | 9.741600000  | 1.980499953  | 8.872200000  |
| O  | 9.741600000  | 1.980499953  | 5.914800000  |
| O  | 9.741600000  | 1.980499953  | 2.957400000  |
| O  | 9.741600000  | 1.980499953  | 0.000000000  |
| O  | 3.247200000  | 1.980499953  | 8.872200000  |
| O  | 3.247200000  | 1.980499953  | 5.914800000  |
| O  | 3.247200000  | 1.980499953  | 2.957400000  |
| O  | 3.247200000  | 1.980499953  | 0.000000000  |

|   |              |             |              |
|---|--------------|-------------|--------------|
| O | 1.266699988  | 3.247190143 | 1.478700000  |
| O | 1.266699988  | 3.247190143 | 4.436100000  |
| O | 5.227599998  | 3.247190143 | 1.478700000  |
| O | 5.227599998  | 3.247190143 | 4.436100000  |
| O | 1.266699988  | 3.247190143 | 7.393500000  |
| O | 1.266699988  | 3.247190143 | 10.350900000 |
| O | 5.227599998  | 3.247190143 | 7.393500000  |
| O | 5.227599998  | 3.247190143 | 10.350900000 |
| O | 7.761099988  | 3.247190143 | 1.478700000  |
| O | 7.761099988  | 3.247190143 | 4.436100000  |
| O | 11.721999998 | 3.247190143 | 1.478700000  |
| O | 11.721999998 | 3.247190143 | 4.436100000  |
| O | 7.761099988  | 3.247190143 | 7.393500000  |
| O | 7.761099988  | 3.247190143 | 10.350900000 |
| O | 11.721999998 | 3.247190143 | 7.393500000  |
| O | 11.721999998 | 3.247190143 | 10.350900000 |
| O | 9.741600000  | 4.513899978 | 8.872200000  |
| O | 9.741600000  | 4.513899978 | 5.914800000  |
| O | 9.741600000  | 4.513899978 | 2.957400000  |
| O | 9.741600000  | 4.513899978 | 0.000000000  |
| O | 3.247200000  | 4.513899978 | 8.872200000  |
| O | 3.247200000  | 4.513899978 | 5.914800000  |

|   |              |             |              |
|---|--------------|-------------|--------------|
| O | 3.247200000  | 4.513899978 | 2.957400000  |
| O | 3.247200000  | 4.513899978 | 0.000000000  |
| O | 0.000000000  | 5.227600085 | 2.957400000  |
| O | 0.000000000  | 5.227600085 | 0.000000000  |
| O | 0.000000000  | 5.227600085 | 8.872200000  |
| O | 0.000000000  | 5.227600085 | 5.914800000  |
| O | 6.494400000  | 5.227600085 | 0.000000000  |
| O | 6.494400000  | 5.227600085 | 2.957400000  |
| O | 6.494400000  | 5.227600085 | 8.872200000  |
| O | 6.494400000  | 5.227600085 | 5.914800000  |
| O | 8.474900012  | 6.494389931 | 7.393500000  |
| O | 11.008299988 | 6.494389931 | 7.393500000  |
| O | 8.474900012  | 6.494389931 | 10.350900000 |
| O | 11.008299988 | 6.494389931 | 10.350900000 |
| O | 8.474900012  | 6.494389931 | 1.478700000  |
| O | 11.008299988 | 6.494389931 | 1.478700000  |
| O | 8.474900012  | 6.494389931 | 4.436100000  |
| O | 11.008299988 | 6.494389931 | 4.436100000  |
| O | 1.980500012  | 6.494389931 | 1.478700000  |
| O | 4.513899988  | 6.494389931 | 1.478700000  |
| O | 1.980500012  | 6.494389931 | 4.436100000  |
| O | 4.513899988  | 6.494389931 | 4.436100000  |



|   |             |             |              |
|---|-------------|-------------|--------------|
| O | 1.980500012 | 6.494389931 | 7.393500000  |
| O | 4.513899988 | 6.494389931 | 7.393500000  |
| O | 1.980500012 | 6.494389931 | 10.350900000 |
| O | 4.513899988 | 6.494389931 | 10.350900000 |
| O | 0.000000000 | 7.761090122 | 8.872200000  |
| O | 0.000000000 | 7.761090122 | 5.914800000  |
| O | 6.494400000 | 7.761090122 | 2.957400000  |
| O | 6.494400000 | 7.761090122 | 0.000000000  |
| O | 0.000000000 | 7.761090122 | 2.957400000  |
| O | 0.000000000 | 7.761090122 | 0.000000000  |
| O | 6.494400000 | 7.761090122 | 8.872200000  |
| O | 6.494400000 | 7.761090122 | 5.914800000  |
| O | 3.247200000 | 8.474889884 | 2.957400000  |
| O | 3.247200000 | 8.474889884 | 0.000000000  |
| O | 3.247200000 | 8.474889884 | 8.872200000  |
| O | 3.247200000 | 8.474889884 | 5.914800000  |
| O | 9.741600000 | 8.474889884 | 2.957400000  |
| O | 9.741600000 | 8.474889884 | 0.000000000  |
| O | 9.741600000 | 8.474889884 | 8.872200000  |
| O | 9.741600000 | 8.474889884 | 5.914800000  |
| O | 1.269921211 | 9.788001167 | 1.477477411  |
| O | 1.270502589 | 9.787922585 | 4.434239677  |

|   |              |              |              |
|---|--------------|--------------|--------------|
| O | 5.211773665  | 9.777781254  | 1.479792937  |
| O | 5.212170602  | 9.777042228  | 4.436925351  |
| O | 1.270902385  | 9.788130827  | 7.392583206  |
| O | 1.270129031  | 9.788268702  | 10.349750281 |
| O | 5.212654825  | 9.777569440  | 7.393784265  |
| O | 5.211673651  | 9.774526541  | 10.351475155 |
| O | 7.759408976  | 9.782884424  | 1.479895736  |
| O | 7.760091927  | 9.782297918  | 4.436158083  |
| O | 11.701719156 | 9.783399849  | 1.477354383  |
| O | 11.702502121 | 9.783065519  | 4.435364554  |
| O | 7.760266237  | 9.782953719  | 7.393995660  |
| O | 7.760224673  | 9.779817950  | 10.351876770 |
| O | 11.702652141 | 9.783558798  | 7.392096418  |
| O | 11.702105313 | 9.783599518  | 10.349618263 |
| O | 9.724693518  | 11.075774838 | 2.958079611  |
| O | 9.723263841  | 11.076114169 | 0.000712733  |
| O | 3.242213859  | 11.075357641 | 2.957455244  |
| O | 3.242224770  | 11.076120955 | 0.000006861  |
| O | 3.243346613  | 11.075469441 | 8.872376734  |
| O | 3.241979152  | 11.074846145 | 5.914547556  |
| O | 9.723833270  | 11.075804842 | 8.873519000  |
| O | 9.724193449  | 11.075549809 | 5.915329966  |

|   |              |              |              |
|---|--------------|--------------|--------------|
| O | 6.468843887  | 11.791009789 | 8.878403087  |
| O | -0.023462059 | 11.801652614 | 2.952743869  |
| O | 6.470897286  | 11.792798238 | -0.003882475 |
| O | 6.470129388  | 11.794171633 | 5.912231794  |
| O | -0.022998489 | 11.801205770 | -0.004212166 |
| O | -0.022767678 | 11.801238632 | 5.909764021  |
| O | 6.468528129  | 11.795223913 | 2.959353895  |
| O | -0.023051613 | 11.801628683 | 8.867295921  |
| O | 8.435074922  | 13.100362721 | 1.481761974  |
| O | 8.433853845  | 13.100888862 | 4.437818131  |
| O | 10.971373609 | 13.117906095 | 1.482096042  |
| O | 10.970666239 | 13.118209707 | 4.438578893  |
| O | 1.963301931  | 13.108420208 | 1.481214381  |
| O | 1.963396750  | 13.107601886 | 4.436357885  |
| O | 4.499582824  | 13.110219729 | 1.479663758  |
| O | 4.500480610  | 13.110477263 | 4.437331698  |
| O | 1.963100995  | 13.107157899 | 7.393985132  |
| O | 1.962818488  | 13.104488620 | 10.351709736 |
| O | 4.499609581  | 13.108969923 | 7.393584108  |
| O | 4.499470990  | 13.115679732 | 10.352934928 |
| O | 8.435001665  | 13.099411525 | 7.396266589  |
| O | 8.435903738  | 13.106531745 | 10.353533742 |

|   |              |              |              |
|---|--------------|--------------|--------------|
| O | 10.971223329 | 13.116838813 | 7.394694908  |
| O | 10.971833283 | 13.114211682 | 10.354115285 |
| O | -0.027136071 | 14.414243034 | 2.964470552  |
| O | -0.026266081 | 14.412927147 | 5.921100918  |
| O | -0.027775510 | 14.414130519 | 8.880052134  |
| O | -0.026639120 | 14.413538656 | 0.005574462  |
| O | 6.464148825  | 14.421796168 | 2.958529490  |
| O | 6.468829859  | 14.413489721 | 5.913990027  |
| O | 6.463996337  | 14.411954519 | 8.863207730  |
| O | 6.469045083  | 14.414215887 | 0.010674203  |
| O | 9.704587765  | 15.119271645 | 8.872218691  |
| O | 3.213667464  | 15.118468325 | 8.872009780  |
| O | 9.688234476  | 15.120290350 | 5.911278683  |
| O | 9.686993656  | 15.121725895 | 2.959249321  |
| O | 3.230218443  | 15.120869354 | 2.958656067  |
| O | 9.700734637  | 15.121704464 | 0.002005827  |
| O | 3.212000222  | 15.120508236 | 0.000810682  |
| O | 3.225346474  | 15.118530119 | 5.910523954  |
| O | 1.250324748  | 16.479834870 | 10.351281031 |
| O | 5.188019877  | 16.501266969 | 4.439093007  |
| O | 5.181299212  | 16.466266661 | 7.391722248  |
| O | 7.733014176  | 16.478644714 | 1.474530184  |

|   |              |              |              |
|---|--------------|--------------|--------------|
| O | 7.730328222  | 16.500630100 | 4.433581596  |
| O | 5.174143163  | 16.430734854 | 10.353151528 |
| O | 11.663364269 | 16.472101355 | 1.478672437  |
| O | 11.663697042 | 16.472092783 | 4.438604918  |
| O | 1.252711570  | 16.474615971 | 4.435704063  |
| O | 1.252275536  | 16.477038432 | 1.479712141  |
| O | 5.183221295  | 16.476537652 | 1.470658356  |
| O | 7.734101469  | 16.463383068 | 7.400072289  |
| O | 7.738862513  | 16.435549772 | 10.347576947 |
| O | 1.251078099  | 16.472178151 | 7.394548221  |
| O | 11.664104500 | 16.471131228 | 7.392526424  |
| O | 11.663012532 | 16.479093344 | 10.351584106 |
| O | 3.235181853  | 17.753229154 | 8.870208369  |
| O | 3.243312972  | 17.759563557 | -0.002609728 |
| O | 9.700537078  | 17.749948724 | 2.953311099  |
| O | 9.688298251  | 17.754156062 | 5.923454062  |
| O | 3.222169154  | 17.747891311 | 2.952683657  |
| O | 3.217824920  | 17.749362218 | 5.920095166  |
| O | 9.673874319  | 17.752353682 | 8.869598198  |
| O | 9.668648535  | 17.761824568 | -0.005284874 |
| O | 6.467383166  | 18.533393342 | -0.119882468 |
| O | 6.485274459  | 18.553858885 | 6.004283353  |

|   |              |              |              |
|---|--------------|--------------|--------------|
| O | -0.037128225 | 18.515194882 | 0.003467374  |
| O | 6.460925914  | 18.582839475 | 2.874647334  |
| O | -0.034074688 | 18.520134816 | 5.915163405  |
| O | 6.451887917  | 18.506794136 | 8.959035652  |
| O | -0.037005741 | 18.515567430 | 8.863260371  |
| O | -0.040196829 | 18.519053960 | 2.960038711  |
| O | 2.016933856  | 19.969915466 | 4.435955087  |
| O | 4.508771361  | 19.976099135 | 1.505547514  |
| O | 4.510421977  | 19.901847246 | 4.443101704  |
| O | 2.017140118  | 19.970401244 | 7.389963896  |
| O | 2.001558623  | 19.932004418 | 10.351954964 |
| O | 4.524430918  | 19.972095752 | 7.374932970  |
| O | 4.474114385  | 20.023359266 | 10.321479193 |
| O | 8.415834873  | 19.982169932 | 1.509736493  |
| O | 8.414585999  | 19.917482870 | 4.432277856  |
| O | 10.906606127 | 19.955072446 | 1.465882747  |
| O | 10.903330481 | 19.969572207 | 4.444729338  |
| O | 8.393996933  | 20.024025068 | 7.378682480  |
| O | 8.445358025  | 20.052909574 | 10.317262059 |
| O | 10.899439946 | 19.967098668 | 7.389003214  |
| O | 10.915760244 | 19.929890212 | 10.350268299 |
| O | 2.011608967  | 19.950691871 | 1.473433344  |

|   |              |              |              |
|---|--------------|--------------|--------------|
| O | -0.035212637 | 21.118920566 | 2.955160538  |
| O | -0.032317433 | 21.121913459 | 5.914768770  |
| O | -0.035984172 | 21.116413094 | 8.873138679  |
| O | -0.033320688 | 21.116983526 | -0.003414141 |
| O | 6.462670440  | 21.253284273 | 8.771451437  |
| O | 6.460655617  | 21.130119536 | 0.063490173  |
| H | 0.000000000  | 0.932899949  | 9.814800036  |
| H | 0.816399984  | 0.932899949  | 8.400899982  |
| H | 6.457700016  | 0.932899949  | 6.856699960  |
| H | 0.834099951  | 0.932899949  | -0.439200043 |
| H | 0.000000000  | 0.932899949  | 3.900000036  |
| H | 0.816399984  | 0.932899949  | 2.486099982  |
| H | 6.457700016  | 0.932899949  | 0.941899960  |
| H | 0.834099951  | 0.932899949  | 5.475599957  |
| H | 6.494400000  | 0.932899949  | 9.814800036  |
| H | 7.310799984  | 0.932899949  | 8.400899982  |
| H | -0.036699984 | 0.932899949  | 6.856699960  |
| H | 7.328499951  | 0.932899949  | -0.439200043 |
| H | 6.494400000  | 0.932899949  | 3.900000036  |
| H | 7.310799984  | 0.932899949  | 2.486099982  |
| H | -0.036699984 | 0.932899949  | 0.941899960  |
| H | 7.328499951  | 0.932899949  | 5.475599957  |

|   |             |              |             |
|---|-------------|--------------|-------------|
| H | 7.284307507 | 21.772816037 | 8.691495052 |
|---|-------------|--------------|-------------|

|   |             |              |             |
|---|-------------|--------------|-------------|
| H | 6.458844849 | 21.271473804 | 4.459844137 |
|---|-------------|--------------|-------------|

9-Ed:

|    |             |             |             |
|----|-------------|-------------|-------------|
| Ti | 3.247200000 | 3.247194072 | 1.478700000 |
|----|-------------|-------------|-------------|

|    |             |             |             |
|----|-------------|-------------|-------------|
| Ti | 3.247200000 | 3.247194072 | 4.436100000 |
|----|-------------|-------------|-------------|

|    |             |             |             |
|----|-------------|-------------|-------------|
| Ti | 0.000000000 | 3.247194072 | 2.957400000 |
|----|-------------|-------------|-------------|

|    |             |             |             |
|----|-------------|-------------|-------------|
| Ti | 0.000000000 | 3.247194072 | 0.000000000 |
|----|-------------|-------------|-------------|

|    |             |             |             |
|----|-------------|-------------|-------------|
| Ti | 3.247200000 | 3.247194072 | 7.393500000 |
|----|-------------|-------------|-------------|

|    |             |             |              |
|----|-------------|-------------|--------------|
| Ti | 3.247200000 | 3.247194072 | 10.350900000 |
|----|-------------|-------------|--------------|

|    |             |             |             |
|----|-------------|-------------|-------------|
| Ti | 0.000000000 | 3.247194072 | 8.872200000 |
|----|-------------|-------------|-------------|

|    |             |             |             |
|----|-------------|-------------|-------------|
| Ti | 0.000000000 | 3.247194072 | 5.914800000 |
|----|-------------|-------------|-------------|

|    |             |             |             |
|----|-------------|-------------|-------------|
| Ti | 9.741600000 | 3.247194072 | 1.478700000 |
|----|-------------|-------------|-------------|

|    |             |             |             |
|----|-------------|-------------|-------------|
| Ti | 9.741600000 | 3.247194072 | 4.436100000 |
|----|-------------|-------------|-------------|

|    |             |             |             |
|----|-------------|-------------|-------------|
| Ti | 6.494400000 | 3.247194072 | 2.957400000 |
|----|-------------|-------------|-------------|

|    |             |             |             |
|----|-------------|-------------|-------------|
| Ti | 6.494400000 | 3.247194072 | 0.000000000 |
|----|-------------|-------------|-------------|

|    |             |             |             |
|----|-------------|-------------|-------------|
| Ti | 9.741600000 | 3.247194072 | 7.393500000 |
|----|-------------|-------------|-------------|

|    |             |             |              |
|----|-------------|-------------|--------------|
| Ti | 9.741600000 | 3.247194072 | 10.350900000 |
|----|-------------|-------------|--------------|

|    |             |             |             |
|----|-------------|-------------|-------------|
| Ti | 6.494400000 | 3.247194072 | 8.872200000 |
|----|-------------|-------------|-------------|

|    |             |             |             |
|----|-------------|-------------|-------------|
| Ti | 6.494400000 | 3.247194072 | 5.914800000 |
|----|-------------|-------------|-------------|

|    |             |             |             |
|----|-------------|-------------|-------------|
| Ti | 0.000000000 | 6.494391717 | 4.436100000 |
|----|-------------|-------------|-------------|

|    |             |             |             |
|----|-------------|-------------|-------------|
| Ti | 0.000000000 | 6.494391717 | 1.478700000 |
|----|-------------|-------------|-------------|

|    |             |             |             |
|----|-------------|-------------|-------------|
| Ti | 3.247200000 | 6.494391717 | 2.957400000 |
|----|-------------|-------------|-------------|



|    |              |             |              |
|----|--------------|-------------|--------------|
| Ti | 3.247200000  | 6.494391717 | 0.000000000  |
| Ti | 0.000000000  | 6.494391717 | 10.350900000 |
| Ti | 0.000000000  | 6.494391717 | 7.393500000  |
| Ti | 3.247200000  | 6.494391717 | 8.872200000  |
| Ti | 3.247200000  | 6.494391717 | 5.914800000  |
| Ti | 6.494400000  | 6.494391717 | 4.436100000  |
| Ti | 6.494400000  | 6.494391717 | 1.478700000  |
| Ti | 9.741600000  | 6.494391717 | 2.957400000  |
| Ti | 9.741600000  | 6.494391717 | 0.000000000  |
| Ti | 6.494400000  | 6.494391717 | 10.350900000 |
| Ti | 6.494400000  | 6.494391717 | 7.393500000  |
| Ti | 9.741600000  | 6.494391717 | 8.872200000  |
| Ti | 9.741600000  | 6.494391717 | 5.914800000  |
| Ti | 3.233096891  | 9.737911378 | 1.478873540  |
| Ti | 3.232564350  | 9.738033180 | 4.436259818  |
| Ti | -0.009321282 | 9.837054391 | 2.957825038  |
| Ti | -0.009665226 | 9.836977238 | 0.001660403  |
| Ti | 3.231585254  | 9.738168197 | 7.393735054  |
| Ti | 3.231069599  | 9.738161768 | 10.350479458 |
| Ti | -0.008712497 | 9.837287279 | 8.872921724  |
| Ti | -0.008727954 | 9.837689832 | 5.914992113  |
| Ti | 9.739785335  | 9.738055325 | 1.483464490  |

|    |              |              |              |
|----|--------------|--------------|--------------|
| Ti | 9.740816126  | 9.739250482  | 4.440144777  |
| Ti | 6.486054696  | 9.730237514  | 2.971862869  |
| Ti | 6.483874136  | 9.757204625  | 0.010746009  |
| Ti | 9.742001094  | 9.736869455  | 7.398495877  |
| Ti | 9.741801326  | 9.738467165  | 10.355902028 |
| Ti | 6.486459167  | 9.747041505  | 8.887019413  |
| Ti | 6.485157300  | 9.750837717  | 5.932586158  |
| Ti | -0.029578095 | 13.177491059 | 1.515502122  |
| Ti | -0.031446924 | 13.178152217 | 4.471700826  |
| Ti | 3.215019209  | 12.996259771 | 2.960942847  |
| Ti | 3.213733058  | 12.995341437 | 5.917063002  |
| Ti | 6.463421972  | 13.020210058 | 1.466642089  |
| Ti | 6.463244155  | 13.002965652 | 4.457643003  |
| Ti | 9.714670451  | 12.997899987 | 2.965504932  |
| Ti | 9.709085397  | 12.993694435 | 5.922434351  |
| Ti | -0.031815416 | 13.176894552 | 7.428398621  |
| Ti | -0.030211819 | 13.176581297 | 10.387577083 |
| Ti | 3.211232584  | 12.995321077 | 8.874006617  |
| Ti | 3.214545637  | 12.994735286 | 0.003065877  |
| Ti | 6.462251421  | 13.080291158 | 7.442997057  |
| Ti | 6.463225321  | 13.102973778 | 10.326878223 |
| Ti | 9.716510574  | 12.995757920 | 8.881583239  |

|    |              |              |              |
|----|--------------|--------------|--------------|
| Ti | 9.712095032  | 12.994563477 | 0.009191244  |
| Ti | 9.692211257  | 16.323931907 | 1.487680796  |
| Ti | 9.693076831  | 16.325689638 | 4.443931905  |
| Ti | 6.442232953  | 16.282782935 | 2.959849555  |
| Ti | -0.054580236 | 16.642310839 | 5.920556993  |
| Ti | 3.185742324  | 16.323599721 | 1.486890224  |
| Ti | 3.184792843  | 16.323968340 | 4.444606429  |
| Ti | -0.057047719 | 16.638919680 | 2.966470109  |
| Ti | 6.440549994  | 16.262257383 | 5.936381449  |
| Ti | 3.176943711  | 16.315771193 | 7.400083764  |
| Ti | 3.173562596  | 16.314235277 | 10.358203477 |
| Ti | -0.056153310 | 16.636257902 | 8.879188100  |
| Ti | 6.441198005  | 16.302693405 | -0.006065036 |
| Ti | 9.698782291  | 16.309448577 | 7.400296460  |
| Ti | 9.702910261  | 16.314207774 | 10.360042270 |
| Ti | 6.438423338  | 16.474824213 | 8.884127194  |
| Ti | -0.056209162 | 16.634775207 | 0.012439652  |
| Ti | 6.406625326  | 19.763758406 | 7.506916290  |
| Ti | 3.192210876  | 19.577420020 | 0.016957850  |
| Ti | 3.172837561  | 19.570820225 | 8.879461363  |
| Ti | 3.214877501  | 19.574706449 | 2.971435466  |
| Ti | 6.431510568  | 19.602008247 | 1.311988878  |

|    |              |              |              |
|----|--------------|--------------|--------------|
| Ti | 6.426835510  | 19.462405995 | 4.604433315  |
| Ti | 6.406348405  | 20.003617390 | 10.427122135 |
| Ti | 3.203811693  | 19.583672269 | 5.917956610  |
| Ti | -0.072955752 | 19.999765098 | 1.489547861  |
| Ti | -0.073092783 | 20.008197634 | 4.446790646  |
| Ti | 9.647297285  | 19.577212850 | 2.976034104  |
| Ti | 9.639526476  | 19.583754065 | 5.926712407  |
| Ti | -0.073250208 | 20.002452951 | 7.399791573  |
| Ti | -0.074226056 | 19.996465737 | 10.361370024 |
| Ti | 9.672859634  | 19.560573166 | 8.881212972  |
| Ti | 9.653234466  | 19.579278835 | 0.016021655  |
| O  | 0.000000000  | 1.266694833  | 2.957400000  |
| O  | 0.000000000  | 1.266694833  | 0.000000000  |
| O  | 0.000000000  | 1.266694833  | 8.872200000  |
| O  | 0.000000000  | 1.266694833  | 5.914800000  |
| O  | 6.494400000  | 1.266694833  | 2.957400000  |
| O  | 6.494400000  | 1.266694833  | 0.000000000  |
| O  | 6.494400000  | 1.266694833  | 8.872200000  |
| O  | 6.494400000  | 1.266694833  | 5.914800000  |
| O  | 9.741600000  | 1.980495667  | 8.872200000  |
| O  | 9.741600000  | 1.980495667  | 5.914800000  |
| O  | 9.741600000  | 1.980495667  | 2.957400000  |

|   |              |             |              |
|---|--------------|-------------|--------------|
| O | 9.741600000  | 1.980495667 | 0.000000000  |
| O | 3.247200000  | 1.980495667 | 8.872200000  |
| O | 3.247200000  | 1.980495667 | 5.914800000  |
| O | 3.247200000  | 1.980495667 | 2.957400000  |
| O | 3.247200000  | 1.980495667 | 0.000000000  |
| O | 1.266698949  | 3.247194072 | 1.478700000  |
| O | 1.266698949  | 3.247194072 | 4.436100000  |
| O | 5.227599738  | 3.247194072 | 1.478700000  |
| O | 5.227599738  | 3.247194072 | 4.436100000  |
| O | 1.266698949  | 3.247194072 | 7.393500000  |
| O | 1.266698949  | 3.247194072 | 10.350900000 |
| O | 5.227599738  | 3.247194072 | 7.393500000  |
| O | 5.227599738  | 3.247194072 | 10.350900000 |
| O | 7.761098949  | 3.247194072 | 1.478700000  |
| O | 7.761098949  | 3.247194072 | 4.436100000  |
| O | 11.721999738 | 3.247194072 | 1.478700000  |
| O | 11.721999738 | 3.247194072 | 4.436100000  |
| O | 7.761098949  | 3.247194072 | 7.393500000  |
| O | 7.761098949  | 3.247194072 | 10.350900000 |
| O | 11.721999738 | 3.247194072 | 7.393500000  |
| O | 11.721999738 | 3.247194072 | 10.350900000 |
| O | 9.741600000  | 4.513896049 | 8.872200000  |

|   |              |             |              |
|---|--------------|-------------|--------------|
| O | 9.741600000  | 4.513896049 | 5.914800000  |
| O | 9.741600000  | 4.513896049 | 2.957400000  |
| O | 9.741600000  | 4.513896049 | 0.000000000  |
| O | 3.247200000  | 4.513896049 | 8.872200000  |
| O | 3.247200000  | 4.513896049 | 5.914800000  |
| O | 3.247200000  | 4.513896049 | 2.957400000  |
| O | 3.247200000  | 4.513896049 | 0.000000000  |
| O | 0.000000000  | 5.227596870 | 2.957400000  |
| O | 0.000000000  | 5.227596870 | 0.000000000  |
| O | 0.000000000  | 5.227596870 | 8.872200000  |
| O | 0.000000000  | 5.227596870 | 5.914800000  |
| O | 6.494400000  | 5.227596870 | 0.000000000  |
| O | 6.494400000  | 5.227596870 | 2.957400000  |
| O | 6.494400000  | 5.227596870 | 8.872200000  |
| O | 6.494400000  | 5.227596870 | 5.914800000  |
| O | 8.474899752  | 6.494391717 | 7.393500000  |
| O | 11.008298949 | 6.494391717 | 7.393500000  |
| O | 8.474899752  | 6.494391717 | 10.350900000 |
| O | 11.008298949 | 6.494391717 | 10.350900000 |
| O | 8.474899752  | 6.494391717 | 1.478700000  |
| O | 11.008298949 | 6.494391717 | 1.478700000  |
| O | 8.474899752  | 6.494391717 | 4.436100000  |

|   |              |             |              |
|---|--------------|-------------|--------------|
| O | 11.008298949 | 6.494391717 | 4.436100000  |
| O | 1.980499752  | 6.494391717 | 1.478700000  |
| O | 4.513898949  | 6.494391717 | 1.478700000  |
| O | 1.980499752  | 6.494391717 | 4.436100000  |
| O | 4.513898949  | 6.494391717 | 4.436100000  |
| O | 1.980499752  | 6.494391717 | 7.393500000  |
| O | 4.513898949  | 6.494391717 | 7.393500000  |
| O | 1.980499752  | 6.494391717 | 10.350900000 |
| O | 4.513898949  | 6.494391717 | 10.350900000 |
| O | 0.000000000  | 7.761086550 | 8.872200000  |
| O | 0.000000000  | 7.761086550 | 5.914800000  |
| O | 6.494400000  | 7.761086550 | 2.957400000  |
| O | 6.494400000  | 7.761086550 | 0.000000000  |
| O | 0.000000000  | 7.761086550 | 2.957400000  |
| O | 0.000000000  | 7.761086550 | 0.000000000  |
| O | 6.494400000  | 7.761086550 | 8.872200000  |
| O | 6.494400000  | 7.761086550 | 5.914800000  |
| O | 3.247200000  | 8.474887384 | 2.957400000  |
| O | 3.247200000  | 8.474887384 | 0.000000000  |
| O | 3.247200000  | 8.474887384 | 8.872200000  |
| O | 3.247200000  | 8.474887384 | 5.914800000  |
| O | 9.741600000  | 8.474887384 | 2.957400000  |

|   |              |              |              |
|---|--------------|--------------|--------------|
| O | 9.741600000  | 8.474887384  | 0.000000000  |
| O | 9.741600000  | 8.474887384  | 8.872200000  |
| O | 9.741600000  | 8.474887384  | 5.914800000  |
| O | 1.271160082  | 9.788284776  | 1.479512575  |
| O | 1.271421937  | 9.788397647  | 4.436541126  |
| O | 5.212567540  | 9.769777346  | 1.485385735  |
| O | 5.212647681  | 9.769798420  | 4.441296152  |
| O | 1.271580919  | 9.788945577  | 7.394481857  |
| O | 1.271371410  | 9.789169177  | 10.351653546 |
| O | 5.212734576  | 9.769287282  | 7.400940464  |
| O | 5.212436613  | 9.769613753  | 10.356872528 |
| O | 7.761466013  | 9.779936537  | 1.485429505  |
| O | 7.761841259  | 9.779233230  | 4.440569223  |
| O | 11.703376916 | 9.779073209  | 1.479235999  |
| O | 11.703440951 | 9.778941406  | 4.436851180  |
| O | 7.761739427  | 9.778837464  | 7.401083365  |
| O | 7.761846844  | 9.779386822  | 10.356646583 |
| O | 11.703448744 | 9.780012261  | 7.394111354  |
| O | 11.703344055 | 9.780048694  | 10.351721684 |
| O | 9.728162437  | 11.073329160 | 2.960218402  |
| O | 9.727109954  | 11.072189368 | 0.003817530  |
| O | 3.245519769  | 11.072907676 | 2.959447704  |



|   |              |              |             |
|---|--------------|--------------|-------------|
| O | 3.244829934  | 11.072093284 | 0.002793797 |
| O | 3.247091154  | 11.072715508 | 8.874487726 |
| O | 3.244934883  | 11.072257234 | 5.916372982 |
| O | 9.726549358  | 11.072344388 | 8.875301839 |
| O | 9.726588454  | 11.072040420 | 5.917292142 |
| O | 6.461738753  | 11.788730561 | 8.885301873 |
| O | -0.028494829 | 11.799531265 | 2.957111003 |
| O | 6.465844383  | 11.789149902 | 0.003306255 |
| O | 6.466069479  | 11.780394467 | 5.928146510 |
| O | -0.027928388 | 11.799731291 | 0.001204017 |
| O | -0.028062562 | 11.798919756 | 5.913929341 |
| O | 6.462969962  | 11.784269261 | 2.961061379 |
| O | -0.028700442 | 11.799217295 | 8.872553114 |
| O | 8.433427683  | 13.091776237 | 1.487219323 |
| O | 8.432472616  | 13.088144689 | 4.440985625 |
| O | 10.968988346 | 13.119478088 | 1.486557102 |
| O | 10.968249153 | 13.118431164 | 4.442224539 |
| O | 1.958971595  | 13.099175780 | 1.486265502 |
| O | 1.958987831  | 13.098089566 | 4.438748293 |
| O | 4.494569537  | 13.111520615 | 1.483873439 |
| O | 4.495180400  | 13.108860980 | 4.441739880 |
| O | 1.957775976  | 13.093755783 | 7.397437127 |

|   |              |              |              |
|---|--------------|--------------|--------------|
| O | 1.957578027  | 13.093839722 | 10.356044456 |
| O | 4.491345067  | 13.114893914 | 7.396007993  |
| O | 4.490627695  | 13.116959900 | 10.360063800 |
| O | 8.435523815  | 13.093313225 | 7.399312711  |
| O | 8.436611627  | 13.094966299 | 10.360349366 |
| O | 10.968747923 | 13.114871411 | 7.397674902  |
| O | 10.970106162 | 13.114344199 | 10.359189474 |
| O | -0.030080112 | 14.412087751 | 2.968707087  |
| O | -0.028786038 | 14.410182501 | 5.925789225  |
| O | -0.030546670 | 14.411108694 | 8.883081812  |
| O | -0.029229866 | 14.412093109 | 0.010831300  |
| O | 6.461590681  | 14.404838942 | 2.967330594  |
| O | 6.467228859  | 14.380936519 | 5.911733413  |
| O | 6.461710827  | 14.409828169 | 8.882061155  |
| O | 6.468011434  | 14.402671158 | 0.020965009  |
| O | 9.694448578  | 15.109979711 | 8.882263204  |
| O | 3.180976343  | 15.113102264 | 8.880731271  |
| O | 9.681293651  | 15.115635810 | 5.917209808  |
| O | 9.674532851  | 15.120745767 | 2.968450739  |
| O | 3.204511789  | 15.120513236 | 2.966609698  |
| O | 9.681833206  | 15.116357334 | 0.014087989  |
| O | 3.189605323  | 15.117444976 | 0.013214373  |

|   |              |              |              |
|---|--------------|--------------|--------------|
| O | 3.190718333  | 15.116732383 | 5.918556489  |
| O | 1.231278492  | 16.482643453 | 10.360604176 |
| O | 5.168641497  | 16.461288507 | 4.449750767  |
| O | 5.156681150  | 16.402177892 | 7.408039052  |
| O | 7.716819480  | 16.474847073 | 1.485343622  |
| O | 7.712840621  | 16.475512517 | 4.446186627  |
| O | 5.156713752  | 16.418008898 | 10.359642074 |
| O | 11.646041366 | 16.465818745 | 1.490523330  |
| O | 11.646611574 | 16.463924568 | 4.447479011  |
| O | 1.234633499  | 16.479988105 | 4.444641918  |
| O | 1.234598429  | 16.483242818 | 1.491178927  |
| O | 5.164918777  | 16.459086433 | 1.481728141  |
| O | 7.722898888  | 16.419021888 | 7.412636862  |
| O | 7.722583131  | 16.436545617 | 10.355130502 |
| O | 1.232038986  | 16.481711545 | 7.401094721  |
| O | 11.647649899 | 16.465760523 | 7.399529311  |
| O | 11.647421815 | 16.466224870 | 10.361657957 |
| O | 3.217543582  | 17.745117375 | 8.877893705  |
| O | 3.220080295  | 17.752989480 | 0.007259826  |
| O | 9.668406034  | 17.753906743 | 2.973804934  |
| O | 9.651308097  | 17.755056537 | 5.929465628  |
| O | 3.216091175  | 17.751535003 | 2.973035892  |

|   |              |              |              |
|---|--------------|--------------|--------------|
| O | 3.225632227  | 17.755705551 | 5.924166441  |
| O | 9.657005764  | 17.737419936 | 8.878612826  |
| O | 9.658064481  | 17.753683500 | 0.007412901  |
| O | 6.433554096  | 18.470273271 | -0.106002916 |
| O | 6.434892462  | 18.398279893 | 6.066848570  |
| O | -0.071158621 | 18.509435554 | 0.017302328  |
| O | 6.424988762  | 18.579278650 | 2.947242277  |
| O | -0.067983379 | 18.517476610 | 5.918583698  |
| O | 6.419266416  | 18.507456366 | 8.887814954  |
| O | -0.071053022 | 18.509844179 | 8.878138104  |
| O | -0.073292811 | 18.516527199 | 2.977503459  |
| O | 1.999662648  | 19.972773698 | 4.449891184  |
| O | 4.478875689  | 19.956530138 | 1.514264983  |
| O | 4.534698954  | 19.988018199 | 4.445469398  |
| O | 1.977787561  | 19.941713550 | 7.388959208  |
| O | 1.966039321  | 19.925071366 | 10.364681839 |
| O | 4.467430998  | 20.006390253 | 7.401092474  |
| O | 4.436254630  | 19.993358900 | 10.333411474 |
| O | 8.375688440  | 19.957864598 | 1.520800127  |
| O | 8.318138444  | 19.986774822 | 4.445403744  |
| O | 10.866018984 | 19.957186652 | 1.494176902  |
| O | 10.850613878 | 19.983026115 | 4.458420444  |

|   |              |              |              |
|---|--------------|--------------|--------------|
| O | 8.386960251  | 20.028659605 | 7.408399145  |
| O | 8.417282344  | 20.009092037 | 10.335035442 |
| O | 10.873134509 | 19.946801361 | 7.393018417  |
| O | 10.882468261 | 19.933499257 | 10.365613420 |
| O | 1.982535617  | 19.941652113 | 1.495166921  |
| O | -0.067146641 | 21.114251382 | 2.968019669  |
| O | -0.066976098 | 21.118110102 | 5.924727164  |
| O | -0.067189504 | 21.108609570 | 8.882710008  |
| O | -0.067296272 | 21.109153927 | 0.011471636  |
| O | 6.446426776  | 21.276281578 | 8.843805411  |
| O | 6.424195796  | 21.048191997 | 0.085699537  |
| H | 0.000000000  | 0.932897449  | 9.814799089  |
| H | 0.816399334  | 0.932897449  | 8.400899272  |
| H | 6.457698847  | 0.932897449  | 6.856699960  |
| H | 0.834099172  | 0.932897449  | -0.439201108 |
| H | 0.000000000  | 0.932897449  | 3.899999089  |
| H | 0.816399334  | 0.932897449  | 2.486099272  |
| H | 6.457698847  | 0.932897449  | 0.941899960  |
| H | 0.834099172  | 0.932897449  | 5.475598892  |
| H | 6.494400000  | 0.932897449  | 9.814799089  |
| H | 7.310799334  | 0.932897449  | 8.400899272  |
| H | -0.036701153 | 0.932897449  | 6.856699960  |

|   |              |              |              |
|---|--------------|--------------|--------------|
| H | 7.328499172  | 0.932897449  | -0.439201108 |
| H | 6.494400000  | 0.932897449  | 3.899999089  |
| H | 7.310799334  | 0.932897449  | 2.486099272  |
| H | -0.036701153 | 0.932897449  | 0.941899960  |
| H | 7.328499172  | 0.932897449  | 5.475598892  |
| H | 7.259285753  | 21.811168214 | 8.802963954  |
| H | 6.424064869  | 20.810424002 | 5.878671810  |

TS9-E4:

|    |             |             |              |
|----|-------------|-------------|--------------|
| Ti | 3.247200000 | 3.247190143 | 1.478700000  |
| Ti | 3.247200000 | 3.247190143 | 4.436100000  |
| Ti | 0.000000000 | 3.247190143 | 2.957400000  |
| Ti | 0.000000000 | 3.247190143 | 0.000000000  |
| Ti | 3.247200000 | 3.247190143 | 7.393500000  |
| Ti | 3.247200000 | 3.247190143 | 10.350900000 |
| Ti | 0.000000000 | 3.247190143 | 8.872200000  |
| Ti | 0.000000000 | 3.247190143 | 5.914800000  |
| Ti | 9.741600000 | 3.247190143 | 1.478700000  |
| Ti | 9.741600000 | 3.247190143 | 4.436100000  |
| Ti | 6.494400000 | 3.247190143 | 2.957400000  |
| Ti | 6.494400000 | 3.247190143 | 0.000000000  |
| Ti | 9.741600000 | 3.247190143 | 7.393500000  |
| Ti | 9.741600000 | 3.247190143 | 10.350900000 |

|    |              |             |              |
|----|--------------|-------------|--------------|
| Ti | 6.494400000  | 3.247190143 | 8.872200000  |
| Ti | 6.494400000  | 3.247190143 | 5.914800000  |
| Ti | 0.000000000  | 6.494389931 | 4.436100000  |
| Ti | 0.000000000  | 6.494389931 | 1.478700000  |
| Ti | 3.247200000  | 6.494389931 | 2.957400000  |
| Ti | 3.247200000  | 6.494389931 | 0.000000000  |
| Ti | 0.000000000  | 6.494389931 | 10.350900000 |
| Ti | 0.000000000  | 6.494389931 | 7.393500000  |
| Ti | 3.247200000  | 6.494389931 | 8.872200000  |
| Ti | 3.247200000  | 6.494389931 | 5.914800000  |
| Ti | 6.494400000  | 6.494389931 | 4.436100000  |
| Ti | 6.494400000  | 6.494389931 | 1.478700000  |
| Ti | 9.741600000  | 6.494389931 | 2.957400000  |
| Ti | 9.741600000  | 6.494389931 | 0.000000000  |
| Ti | 6.494400000  | 6.494389931 | 10.350900000 |
| Ti | 6.494400000  | 6.494389931 | 7.393500000  |
| Ti | 9.741600000  | 6.494389931 | 8.872200000  |
| Ti | 9.741600000  | 6.494389931 | 5.914800000  |
| Ti | 3.232489275  | 9.738759346 | 1.479390849  |
| Ti | 3.233250418  | 9.740536723 | 4.435996491  |
| Ti | -0.007285028 | 9.838882131 | 2.957814746  |
| Ti | -0.010367011 | 9.837572673 | 0.000813640  |

|    |              |              |              |
|----|--------------|--------------|--------------|
| Ti | 3.232035576  | 9.738114619  | 7.393319599  |
| Ti | 3.230034911  | 9.738783992  | 10.351153982 |
| Ti | -0.008325041 | 9.838127032  | 8.872192666  |
| Ti | -0.008611704 | 9.839027864  | 5.914491484  |
| Ti | 9.741103308  | 9.739170472  | 1.483040044  |
| Ti | 9.741815095  | 9.739683753  | 4.440010156  |
| Ti | 6.486760507  | 9.735179948  | 2.970262797  |
| Ti | 6.484120664  | 9.750982379  | 0.009698734  |
| Ti | 9.742328282  | 9.739583383  | 7.397446236  |
| Ti | 9.742131761  | 9.738885792  | 10.355176874 |
| Ti | 6.486338891  | 9.749139280  | 8.888395196  |
| Ti | 6.485720234  | 9.739102249  | 5.930836206  |
| Ti | -0.029087249 | 13.182822473 | 1.516577669  |
| Ti | -0.028945281 | 13.180945084 | 4.473658743  |
| Ti | 3.214385096  | 13.000024194 | 2.960590561  |
| Ti | 3.216315231  | 12.998283609 | 5.919258340  |
| Ti | 6.465024140  | 13.028711174 | 1.449750721  |
| Ti | 6.463576668  | 13.004069725 | 4.443779895  |
| Ti | 9.713642257  | 12.999234448 | 2.965445074  |
| Ti | 9.713752532  | 12.997873555 | 5.921958801  |
| Ti | -0.030206623 | 13.183218597 | 7.430317146  |
| Ti | -0.028779024 | 13.177573213 | 10.388210440 |



|    |              |              |              |
|----|--------------|--------------|--------------|
| Ti | 3.213715263  | 12.996832704 | 8.874666353  |
| Ti | 3.215443943  | 12.996926645 | 0.003974036  |
| Ti | 6.466459922  | 13.040609164 | 7.436160495  |
| Ti | 6.466991034  | 13.127868117 | 10.349632577 |
| Ti | 9.715167792  | 12.997869626 | 8.880866838  |
| Ti | 9.716593962  | 12.997951422 | 0.009520462  |
| Ti | 9.697463538  | 16.330771376 | 1.487653943  |
| Ti | 9.702442535  | 16.331065343 | 4.442828558  |
| Ti | 6.444538595  | 16.262971406 | 2.957342508  |
| Ti | -0.050549422 | 16.648827409 | 5.916913950  |
| Ti | 3.192804334  | 16.332167988 | 1.486434666  |
| Ti | 3.188159799  | 16.332328723 | 4.439998918  |
| Ti | -0.050429925 | 16.649129949 | 2.960115248  |
| Ti | 6.448383020  | 16.254653171 | 5.924163247  |
| Ti | 3.189496866  | 16.327540238 | 7.395247587  |
| Ti | 3.175555987  | 16.310197247 | 10.357674102 |
| Ti | -0.049746455 | 16.642911632 | 8.872418020  |
| Ti | 6.447427823  | 16.366885759 | -0.007738806 |
| Ti | 9.699805159  | 16.325140994 | 7.398377936  |
| Ti | 9.712202969  | 16.310913413 | 10.357671381 |
| Ti | 6.441692359  | 16.398470262 | 8.890377837  |
| Ti | -0.051701399 | 16.643879974 | 0.007580289  |

|    |              |              |              |
|----|--------------|--------------|--------------|
| Ti | 6.420734800  | 19.584086252 | 7.519409649  |
| Ti | 3.196746955  | 19.576032695 | 0.013608890  |
| Ti | 3.175341153  | 19.560870705 | 8.890674050  |
| Ti | 3.211633678  | 19.596073182 | 2.965455603  |
| Ti | 6.426100344  | 19.654774459 | 1.231848543  |
| Ti | 6.426939810  | 19.556898755 | 4.471695976  |
| Ti | 6.420817409  | 20.106164421 | 10.306835213 |
| Ti | 3.204747016  | 19.595477390 | 5.925782009  |
| Ti | -0.073624415 | 20.009766768 | 1.492827027  |
| Ti | -0.071450350 | 20.014224496 | 4.446970929  |
| Ti | 9.643965139  | 19.593412119 | 2.969138394  |
| Ti | 9.651072350  | 19.592568079 | 5.929865942  |
| Ti | -0.070887935 | 20.012087787 | 7.402477247  |
| Ti | -0.073603633 | 20.005840538 | 10.365619690 |
| Ti | 9.672550760  | 19.559645544 | 8.890467860  |
| Ti | 9.654618682  | 19.574710736 | 0.014053092  |
| O  | 0.000000000  | 1.266689833  | 2.957400000  |
| O  | 0.000000000  | 1.266689833  | 0.000000000  |
| O  | 0.000000000  | 1.266689833  | 8.872200000  |
| O  | 0.000000000  | 1.266689833  | 5.914800000  |
| O  | 6.494400000  | 1.266689833  | 2.957400000  |
| O  | 6.494400000  | 1.266689833  | 0.000000000  |

|   |              |             |              |
|---|--------------|-------------|--------------|
| O | 6.494400000  | 1.266689833 | 8.872200000  |
| O | 6.494400000  | 1.266689833 | 5.914800000  |
| O | 9.741600000  | 1.980499953 | 8.872200000  |
| O | 9.741600000  | 1.980499953 | 5.914800000  |
| O | 9.741600000  | 1.980499953 | 2.957400000  |
| O | 9.741600000  | 1.980499953 | 0.000000000  |
| O | 3.247200000  | 1.980499953 | 8.872200000  |
| O | 3.247200000  | 1.980499953 | 5.914800000  |
| O | 3.247200000  | 1.980499953 | 2.957400000  |
| O | 3.247200000  | 1.980499953 | 0.000000000  |
| O | 1.266699988  | 3.247190143 | 1.478700000  |
| O | 1.266699988  | 3.247190143 | 4.436100000  |
| O | 5.227599998  | 3.247190143 | 1.478700000  |
| O | 5.227599998  | 3.247190143 | 4.436100000  |
| O | 1.266699988  | 3.247190143 | 7.393500000  |
| O | 1.266699988  | 3.247190143 | 10.350900000 |
| O | 5.227599998  | 3.247190143 | 7.393500000  |
| O | 5.227599998  | 3.247190143 | 10.350900000 |
| O | 7.761099988  | 3.247190143 | 1.478700000  |
| O | 7.761099988  | 3.247190143 | 4.436100000  |
| O | 11.721999998 | 3.247190143 | 1.478700000  |
| O | 11.721999998 | 3.247190143 | 4.436100000  |

|   |              |             |              |
|---|--------------|-------------|--------------|
| O | 7.761099988  | 3.247190143 | 7.393500000  |
| O | 7.761099988  | 3.247190143 | 10.350900000 |
| O | 11.721999998 | 3.247190143 | 7.393500000  |
| O | 11.721999998 | 3.247190143 | 10.350900000 |
| O | 9.741600000  | 4.513899978 | 8.872200000  |
| O | 9.741600000  | 4.513899978 | 5.914800000  |
| O | 9.741600000  | 4.513899978 | 2.957400000  |
| O | 9.741600000  | 4.513899978 | 0.000000000  |
| O | 3.247200000  | 4.513899978 | 8.872200000  |
| O | 3.247200000  | 4.513899978 | 5.914800000  |
| O | 3.247200000  | 4.513899978 | 2.957400000  |
| O | 3.247200000  | 4.513899978 | 0.000000000  |
| O | 0.000000000  | 5.227600085 | 2.957400000  |
| O | 0.000000000  | 5.227600085 | 0.000000000  |
| O | 0.000000000  | 5.227600085 | 8.872200000  |
| O | 0.000000000  | 5.227600085 | 5.914800000  |
| O | 6.494400000  | 5.227600085 | 0.000000000  |
| O | 6.494400000  | 5.227600085 | 2.957400000  |
| O | 6.494400000  | 5.227600085 | 8.872200000  |
| O | 6.494400000  | 5.227600085 | 5.914800000  |
| O | 8.474900012  | 6.494389931 | 7.393500000  |
| O | 11.008299988 | 6.494389931 | 7.393500000  |

|   |              |             |              |
|---|--------------|-------------|--------------|
| O | 8.474900012  | 6.494389931 | 10.350900000 |
| O | 11.008299988 | 6.494389931 | 10.350900000 |
| O | 8.474900012  | 6.494389931 | 1.478700000  |
| O | 11.008299988 | 6.494389931 | 1.478700000  |
| O | 8.474900012  | 6.494389931 | 4.436100000  |
| O | 11.008299988 | 6.494389931 | 4.436100000  |
| O | 1.980500012  | 6.494389931 | 1.478700000  |
| O | 4.513899988  | 6.494389931 | 1.478700000  |
| O | 1.980500012  | 6.494389931 | 4.436100000  |
| O | 4.513899988  | 6.494389931 | 4.436100000  |
| O | 1.980500012  | 6.494389931 | 7.393500000  |
| O | 4.513899988  | 6.494389931 | 7.393500000  |
| O | 1.980500012  | 6.494389931 | 10.350900000 |
| O | 4.513899988  | 6.494389931 | 10.350900000 |
| O | 0.000000000  | 7.761090122 | 8.872200000  |
| O | 0.000000000  | 7.761090122 | 5.914800000  |
| O | 6.494400000  | 7.761090122 | 2.957400000  |
| O | 6.494400000  | 7.761090122 | 0.000000000  |
| O | 0.000000000  | 7.761090122 | 2.957400000  |
| O | 0.000000000  | 7.761090122 | 0.000000000  |
| O | 6.494400000  | 7.761090122 | 8.872200000  |
| O | 6.494400000  | 7.761090122 | 5.914800000  |

|   |              |             |              |
|---|--------------|-------------|--------------|
| O | 3.247200000  | 8.474889884 | 2.957400000  |
| O | 3.247200000  | 8.474889884 | 0.000000000  |
| O | 3.247200000  | 8.474889884 | 8.872200000  |
| O | 3.247200000  | 8.474889884 | 5.914800000  |
| O | 9.741600000  | 8.474889884 | 2.957400000  |
| O | 9.741600000  | 8.474889884 | 0.000000000  |
| O | 9.741600000  | 8.474889884 | 8.872200000  |
| O | 9.741600000  | 8.474889884 | 5.914800000  |
| O | 1.272130735  | 9.790202170 | 1.477777528  |
| O | 1.271792247  | 9.788330853 | 4.436338840  |
| O | 5.213368170  | 9.776416789 | 1.483385705  |
| O | 5.213193600  | 9.771078589 | 4.440810192  |
| O | 1.272215812  | 9.790314685 | 7.393930006  |
| O | 1.271456747  | 9.789477789 | 10.351085843 |
| O | 5.213354272  | 9.776126037 | 7.399771344  |
| O | 5.212530132  | 9.769113688 | 10.355989449 |
| O | 7.761052969  | 9.784037075 | 1.482729872  |
| O | 7.761695005  | 9.779500408 | 4.440736493  |
| O | 11.703227285 | 9.781532818 | 1.478545624  |
| O | 11.704017524 | 9.780386953 | 4.435875711  |
| O | 7.761443282  | 9.783953850 | 7.399460699  |
| O | 7.761900228  | 9.777479071 | 10.356217878 |

|   |              |              |              |
|---|--------------|--------------|--------------|
| O | 11.703342626 | 9.781800353  | 7.393994714  |
| O | 11.703381462 | 9.781386370  | 10.350544166 |
| O | 9.727295694  | 11.075082962 | 2.960438669  |
| O | 9.725951224  | 11.075475513 | 0.001176099  |
| O | 3.244463779  | 11.075139041 | 2.959792891  |
| O | 3.246736170  | 11.075137255 | -0.000136514 |
| O | 3.246177911  | 11.075071175 | 8.875389142  |
| O | 3.245027234  | 11.074536819 | 5.915339193  |
| O | 9.725334386  | 11.075329066 | 8.876112758  |
| O | 9.727491565  | 11.074707198 | 5.915977282  |
| O | 6.466862185  | 11.795633967 | 8.897763647  |
| O | -0.026063196 | 11.800749282 | 2.955895157  |
| O | 6.466724244  | 11.796214401 | -0.013804788 |
| O | 6.466407577  | 11.783663110 | 5.919789844  |
| O | -0.026691594 | 11.801238989 | -0.003119820 |
| O | -0.026518454 | 11.800849295 | 5.911976866  |
| O | 6.466187807  | 11.786148437 | 2.961576204  |
| O | -0.026335961 | 11.801825851 | 8.870809904  |
| O | 8.435266637  | 13.090710740 | 1.485334986  |
| O | 8.432568603  | 13.095566378 | 4.440925530  |
| O | 10.970105902 | 13.118955519 | 1.485576192  |
| O | 10.969043029 | 13.122270597 | 4.440754711  |

|   |              |              |              |
|---|--------------|--------------|--------------|
| O | 1.960717939  | 13.100661332 | 1.483202464  |
| O | 1.961509997  | 13.104321455 | 4.439700339  |
| O | 4.495912708  | 13.108902771 | 1.484213303  |
| O | 4.498296413  | 13.114570301 | 4.439385435  |
| O | 1.960627537  | 13.101242837 | 7.395134259  |
| O | 1.960629096  | 13.102419420 | 10.354479045 |
| O | 4.495568375  | 13.108290190 | 7.395980904  |
| O | 4.494680331  | 13.132796621 | 10.355270327 |
| O | 8.435804633  | 13.090371410 | 7.397088509  |
| O | 8.436771909  | 13.113411577 | 10.357323355 |
| O | 10.969736371 | 13.118905155 | 7.396900419  |
| O | 10.970349053 | 13.119636680 | 10.356071191 |
| O | -0.028026064 | 14.413773329 | 2.966555401  |
| O | -0.028124519 | 14.413563659 | 5.924388837  |
| O | -0.027958132 | 14.414673447 | 8.881042153  |
| O | -0.028211933 | 14.413912990 | 0.010479251  |
| O | 6.466193132  | 14.397420469 | 2.960490956  |
| O | 6.467276658  | 14.390081648 | 5.922355920  |
| O | 6.466054152  | 14.423734994 | 8.852608526  |
| O | 6.467106764  | 14.417657768 | 0.030974033  |
| O | 9.691910566  | 15.116548430 | 8.868461492  |
| O | 3.191499480  | 15.118892309 | 8.866265918  |



|   |              |              |              |
|---|--------------|--------------|--------------|
| O | 9.679571856  | 15.123776165 | 5.919165832  |
| O | 9.680888530  | 15.125953950 | 2.964436601  |
| O | 3.203912356  | 15.125954308 | 2.962992207  |
| O | 9.691474662  | 15.119717775 | 0.020276171  |
| O | 3.191727433  | 15.120065678 | 0.020184492  |
| O | 3.205319303  | 15.125148130 | 5.918319897  |
| O | 1.233741947  | 16.484135792 | 10.358329462 |
| O | 5.172945076  | 16.447546347 | 4.441194417  |
| O | 5.166969708  | 16.469106319 | 7.397918237  |
| O | 7.720338406  | 16.484898392 | 1.489791196  |
| O | 7.716955213  | 16.463837056 | 4.440685035  |
| O | 5.156762979  | 16.398499194 | 10.357720119 |
| O | 11.650543673 | 16.474469166 | 1.490084334  |
| O | 11.651514716 | 16.467400738 | 4.441428288  |
| O | 1.238462337  | 16.482636667 | 4.440968827  |
| O | 1.239201789  | 16.491939316 | 1.489420338  |
| O | 5.169493952  | 16.468178340 | 1.489499360  |
| O | 7.722123717  | 16.484250450 | 7.399437631  |
| O | 7.733034698  | 16.420759616 | 10.355852344 |
| O | 1.237497529  | 16.489247534 | 7.393798461  |
| O | 11.652536155 | 16.471261245 | 7.394122000  |
| O | 11.655782706 | 16.467761857 | 10.357675049 |

|   |              |              |              |
|---|--------------|--------------|--------------|
| O | 3.209476888  | 17.738702962 | 8.888078399  |
| O | 3.223968752  | 17.751177099 | 0.004595563  |
| O | 9.661291548  | 17.768185046 | 2.979142805  |
| O | 9.668032216  | 17.765818307 | 5.907174285  |
| O | 3.229340660  | 17.769287691 | 2.978240561  |
| O | 3.222709098  | 17.768422220 | 5.904836046  |
| O | 9.681773198  | 17.737180262 | 8.887840624  |
| O | 9.667793482  | 17.750304842 | 0.005889721  |
| O | 6.423368020  | 18.471663811 | -0.106052127 |
| O | 6.424774057  | 18.476402647 | 5.930525560  |
| O | -0.069715306 | 18.517611985 | 0.019764304  |
| O | 6.427179193  | 18.587112893 | 2.964541293  |
| O | -0.067129755 | 18.524783997 | 5.915557686  |
| O | 6.422607395  | 18.509284820 | 9.004485685  |
| O | -0.068402528 | 18.518146340 | 8.870449811  |
| O | -0.067179243 | 18.524488959 | 2.976162810  |
| O | 2.007651020  | 19.981944188 | 4.446069041  |
| O | 4.485388533  | 19.964958744 | 1.515470419  |
| O | 4.564881158  | 20.113108547 | 4.451464166  |
| O | 1.984946857  | 19.962061578 | 7.385366677  |
| O | 1.955746736  | 19.915917664 | 10.373147692 |
| O | 4.472946042  | 19.892883569 | 7.403831381  |

|   |              |              |              |
|---|--------------|--------------|--------------|
| O | 4.416434501  | 19.995825653 | 10.348309672 |
| O | 8.368660200  | 19.953409728 | 1.517447618  |
| O | 8.292336323  | 20.103644090 | 4.454325037  |
| O | 10.865425656 | 19.964026121 | 1.506403385  |
| O | 10.848721280 | 19.988789729 | 4.447218996  |
| O | 8.378730807  | 19.875590228 | 7.403389546  |
| O | 8.430858368  | 19.974746457 | 10.349672442 |
| O | 10.866697000 | 19.974845399 | 7.387846516  |
| O | 10.892090494 | 19.932142294 | 10.373233575 |
| O | 1.986105328  | 19.951537697 | 1.505702482  |
| O | -0.064432631 | 21.123419014 | 2.969650852  |
| O | -0.065031804 | 21.123708694 | 5.923590576  |
| O | -0.063981010 | 21.116639909 | 8.882376413  |
| O | -0.064900877 | 21.118890562 | 0.015649260  |
| O | 6.431971801  | 21.220642132 | 8.816085346  |
| O | 6.430205584  | 21.084010627 | 0.051819208  |
| H | 0.000000000  | 0.932899949  | 9.814800036  |
| H | 0.816399984  | 0.932899949  | 8.400899982  |
| H | 6.457700016  | 0.932899949  | 6.856699960  |
| H | 0.834099951  | 0.932899949  | -0.439200043 |
| H | 0.000000000  | 0.932899949  | 3.900000036  |
| H | 0.816399984  | 0.932899949  | 2.486099982  |

|   |              |              |              |
|---|--------------|--------------|--------------|
| H | 6.457700016  | 0.932899949  | 0.941899960  |
| H | 0.834099951  | 0.932899949  | 5.475599957  |
| H | 6.494400000  | 0.932899949  | 9.814800036  |
| H | 7.310799984  | 0.932899949  | 8.400899982  |
| H | -0.036699984 | 0.932899949  | 6.856699960  |
| H | 7.328499951  | 0.932899949  | -0.439200043 |
| H | 6.494400000  | 0.932899949  | 3.900000036  |
| H | 7.310799984  | 0.932899949  | 2.486099982  |
| H | -0.036699984 | 0.932899949  | 0.941899960  |
| H | 7.328499951  | 0.932899949  | 5.475599957  |
| H | 6.431955824  | 21.527659573 | 7.666040143  |
| H | 6.431255468  | 21.286103581 | 6.600889592  |

TS9-F1:

|    |             |             |              |
|----|-------------|-------------|--------------|
| Ti | 3.247200000 | 3.247190143 | 1.478700000  |
| Ti | 3.247200000 | 3.247190143 | 4.436100000  |
| Ti | 0.000000000 | 3.247190143 | 2.957400000  |
| Ti | 0.000000000 | 3.247190143 | 0.000000000  |
| Ti | 3.247200000 | 3.247190143 | 7.393500000  |
| Ti | 3.247200000 | 3.247190143 | 10.350900000 |
| Ti | 0.000000000 | 3.247190143 | 8.872200000  |
| Ti | 0.000000000 | 3.247190143 | 5.914800000  |
| Ti | 9.741600000 | 3.247190143 | 1.478700000  |

|    |             |             |              |
|----|-------------|-------------|--------------|
| Ti | 9.741600000 | 3.247190143 | 4.436100000  |
| Ti | 6.494400000 | 3.247190143 | 2.957400000  |
| Ti | 6.494400000 | 3.247190143 | 0.000000000  |
| Ti | 9.741600000 | 3.247190143 | 7.393500000  |
| Ti | 9.741600000 | 3.247190143 | 10.350900000 |
| Ti | 6.494400000 | 3.247190143 | 8.872200000  |
| Ti | 6.494400000 | 3.247190143 | 5.914800000  |
| Ti | 0.000000000 | 6.494389931 | 4.436100000  |
| Ti | 0.000000000 | 6.494389931 | 1.478700000  |
| Ti | 3.247200000 | 6.494389931 | 2.957400000  |
| Ti | 3.247200000 | 6.494389931 | 0.000000000  |
| Ti | 0.000000000 | 6.494389931 | 10.350900000 |
| Ti | 0.000000000 | 6.494389931 | 7.393500000  |
| Ti | 3.247200000 | 6.494389931 | 8.872200000  |
| Ti | 3.247200000 | 6.494389931 | 5.914800000  |
| Ti | 6.494400000 | 6.494389931 | 4.436100000  |
| Ti | 6.494400000 | 6.494389931 | 1.478700000  |
| Ti | 9.741600000 | 6.494389931 | 2.957400000  |
| Ti | 9.741600000 | 6.494389931 | 0.000000000  |
| Ti | 6.494400000 | 6.494389931 | 10.350900000 |
| Ti | 6.494400000 | 6.494389931 | 7.393500000  |
| Ti | 9.741600000 | 6.494389931 | 8.872200000  |

|    |              |              |              |
|----|--------------|--------------|--------------|
| Ti | 9.741600000  | 6.494389931  | 5.914800000  |
| Ti | 3.226690035  | 9.739706614  | 1.478810725  |
| Ti | 3.229244283  | 9.740348126  | 4.436206821  |
| Ti | -0.014106097 | 9.837814134  | 2.960561579  |
| Ti | -0.013056212 | 9.837338357  | 0.002926525  |
| Ti | 3.231663707  | 9.738413587  | 7.393619952  |
| Ti | 3.227824867  | 9.739941287  | 10.351473972 |
| Ti | -0.007710411 | 9.838492080  | 8.872895344  |
| Ti | -0.011392476 | 9.838533157  | 5.915752519  |
| Ti | 9.736544239  | 9.739351567  | 1.481666154  |
| Ti | 9.735361349  | 9.739371927  | 4.439129324  |
| Ti | 6.478048140  | 9.739140825  | 2.969365049  |
| Ti | 6.483320424  | 9.746073164  | 0.012255702  |
| Ti | 9.741502324  | 9.739474440  | 7.397733104  |
| Ti | 9.742302694  | 9.739747333  | 10.354659920 |
| Ti | 6.484247434  | 9.744366868  | 8.890387892  |
| Ti | 6.485873502  | 9.730859381  | 5.931936359  |
| Ti | -0.031291968 | 13.181951288 | 1.518294263  |
| Ti | -0.032981031 | 13.181009021 | 4.474051723  |
| Ti | 3.211689270  | 12.999439117 | 2.958442069  |
| Ti | 3.211649135  | 12.999582350 | 5.915385329  |
| Ti | 6.460543004  | 13.054477056 | 1.452629928  |

|    |              |              |              |
|----|--------------|--------------|--------------|
| Ti | 6.462143484  | 12.997115955 | 4.435881862  |
| Ti | 9.709952269  | 12.997930348 | 2.963465036  |
| Ti | 9.712020606  | 12.997891414 | 5.920897331  |
| Ti | -0.032262231 | 13.183593289 | 7.430547705  |
| Ti | -0.031752550 | 13.178035774 | 10.389207675 |
| Ti | 3.210862273  | 12.997605305 | 8.872125592  |
| Ti | 3.211255444  | 12.999471622 | 0.000637261  |
| Ti | 6.462404299  | 13.016233822 | 7.428881387  |
| Ti | 6.463170768  | 13.103070577 | 10.370511584 |
| Ti | 9.713174791  | 12.997856767 | 8.879060813  |
| Ti | 9.715074662  | 12.998293967 | 0.008329221  |
| Ti | 9.696135953  | 16.331561123 | 1.487276815  |
| Ti | 9.699382893  | 16.333309209 | 4.443114125  |
| Ti | 6.442701459  | 16.265762129 | 2.956390462  |
| Ti | -0.049624750 | 16.648759900 | 5.917026212  |
| Ti | 3.183968314  | 16.332197992 | 1.483213584  |
| Ti | 3.192232438  | 16.334056093 | 4.440532433  |
| Ti | -0.050977663 | 16.646939304 | 2.965453118  |
| Ti | 6.450853489  | 16.241618603 | 5.933239744  |
| Ti | 3.184918184  | 16.326554037 | 7.398644220  |
| Ti | 3.167640742  | 16.315055742 | 10.356541300 |
| Ti | -0.055790143 | 16.638856100 | 8.873484221  |

|    |              |              |              |
|----|--------------|--------------|--------------|
| Ti | 6.439515826  | 16.397823034 | -0.008033126 |
| Ti | 9.698228838  | 16.322501719 | 7.400874691  |
| Ti | 9.703283300  | 16.311915330 | 10.359728430 |
| Ti | 6.435565282  | 16.329884117 | 8.889654338  |
| Ti | -0.057333343 | 16.637169807 | 0.009409027  |
| Ti | 6.430081411  | 19.609126681 | 7.648110137  |
| Ti | 6.421490359  | 20.004805045 | 10.543907850 |
| Ti | 3.199792439  | 19.574731453 | 8.885581998  |
| Ti | 3.201939098  | 19.576269869 | 0.007401544  |
| Ti | 6.439558039  | 19.651321506 | 1.372189239  |
| Ti | 6.434235619  | 19.443766405 | 4.476535466  |
| Ti | 3.220131341  | 19.601040263 | 2.960137369  |
| Ti | 3.229632128  | 19.600363388 | 5.931528592  |
| Ti | -0.066557729 | 20.004351772 | 1.493975917  |
| Ti | -0.060488322 | 20.015367503 | 4.449830144  |
| Ti | 9.654862222  | 19.598893553 | 2.965078830  |
| Ti | 9.634633985  | 19.601596765 | 5.930955212  |
| Ti | -0.061371690 | 20.008355511 | 7.401881390  |
| Ti | -0.058530650 | 19.995644557 | 10.363027233 |
| Ti | 9.678587175  | 19.563391036 | 8.886893310  |
| Ti | 9.663032697  | 19.576605984 | 0.004149705  |
| O  | 0.000000000  | 1.266689833  | 2.957400000  |



|   |             |             |              |
|---|-------------|-------------|--------------|
| O | 0.000000000 | 1.266689833 | 0.000000000  |
| O | 0.000000000 | 1.266689833 | 8.872200000  |
| O | 0.000000000 | 1.266689833 | 5.914800000  |
| O | 6.494400000 | 1.266689833 | 2.957400000  |
| O | 6.494400000 | 1.266689833 | 0.000000000  |
| O | 6.494400000 | 1.266689833 | 8.872200000  |
| O | 6.494400000 | 1.266689833 | 5.914800000  |
| O | 9.741600000 | 1.980499953 | 8.872200000  |
| O | 9.741600000 | 1.980499953 | 5.914800000  |
| O | 9.741600000 | 1.980499953 | 2.957400000  |
| O | 9.741600000 | 1.980499953 | 0.000000000  |
| O | 3.247200000 | 1.980499953 | 8.872200000  |
| O | 3.247200000 | 1.980499953 | 5.914800000  |
| O | 3.247200000 | 1.980499953 | 2.957400000  |
| O | 3.247200000 | 1.980499953 | 0.000000000  |
| O | 1.266699988 | 3.247190143 | 1.478700000  |
| O | 1.266699988 | 3.247190143 | 4.436100000  |
| O | 5.227599998 | 3.247190143 | 1.478700000  |
| O | 5.227599998 | 3.247190143 | 4.436100000  |
| O | 1.266699988 | 3.247190143 | 7.393500000  |
| O | 1.266699988 | 3.247190143 | 10.350900000 |
| O | 5.227599998 | 3.247190143 | 7.393500000  |

|   |              |             |              |
|---|--------------|-------------|--------------|
| O | 5.227599998  | 3.247190143 | 10.350900000 |
| O | 7.761099988  | 3.247190143 | 1.478700000  |
| O | 7.761099988  | 3.247190143 | 4.436100000  |
| O | 11.721999998 | 3.247190143 | 1.478700000  |
| O | 11.721999998 | 3.247190143 | 4.436100000  |
| O | 7.761099988  | 3.247190143 | 7.393500000  |
| O | 7.761099988  | 3.247190143 | 10.350900000 |
| O | 11.721999998 | 3.247190143 | 7.393500000  |
| O | 11.721999998 | 3.247190143 | 10.350900000 |
| O | 9.741600000  | 4.513899978 | 8.872200000  |
| O | 9.741600000  | 4.513899978 | 5.914800000  |
| O | 9.741600000  | 4.513899978 | 2.957400000  |
| O | 9.741600000  | 4.513899978 | 0.000000000  |
| O | 3.247200000  | 4.513899978 | 8.872200000  |
| O | 3.247200000  | 4.513899978 | 5.914800000  |
| O | 3.247200000  | 4.513899978 | 2.957400000  |
| O | 3.247200000  | 4.513899978 | 0.000000000  |
| O | 0.000000000  | 5.227600085 | 2.957400000  |
| O | 0.000000000  | 5.227600085 | 0.000000000  |
| O | 0.000000000  | 5.227600085 | 8.872200000  |
| O | 0.000000000  | 5.227600085 | 5.914800000  |
| O | 6.494400000  | 5.227600085 | 0.000000000  |

|   |              |             |              |
|---|--------------|-------------|--------------|
| O | 6.494400000  | 5.227600085 | 2.957400000  |
| O | 6.494400000  | 5.227600085 | 8.872200000  |
| O | 6.494400000  | 5.227600085 | 5.914800000  |
| O | 8.474900012  | 6.494389931 | 7.393500000  |
| O | 11.008299988 | 6.494389931 | 7.393500000  |
| O | 8.474900012  | 6.494389931 | 10.350900000 |
| O | 11.008299988 | 6.494389931 | 10.350900000 |
| O | 8.474900012  | 6.494389931 | 1.478700000  |
| O | 11.008299988 | 6.494389931 | 1.478700000  |
| O | 8.474900012  | 6.494389931 | 4.436100000  |
| O | 11.008299988 | 6.494389931 | 4.436100000  |
| O | 1.980500012  | 6.494389931 | 1.478700000  |
| O | 4.513899988  | 6.494389931 | 1.478700000  |
| O | 1.980500012  | 6.494389931 | 4.436100000  |
| O | 4.513899988  | 6.494389931 | 4.436100000  |
| O | 1.980500012  | 6.494389931 | 7.393500000  |
| O | 4.513899988  | 6.494389931 | 7.393500000  |
| O | 1.980500012  | 6.494389931 | 10.350900000 |
| O | 4.513899988  | 6.494389931 | 10.350900000 |
| O | 0.000000000  | 7.761090122 | 8.872200000  |
| O | 0.000000000  | 7.761090122 | 5.914800000  |
| O | 6.494400000  | 7.761090122 | 2.957400000  |

|   |             |             |              |
|---|-------------|-------------|--------------|
| O | 6.494400000 | 7.761090122 | 0.000000000  |
| O | 0.000000000 | 7.761090122 | 2.957400000  |
| O | 0.000000000 | 7.761090122 | 0.000000000  |
| O | 6.494400000 | 7.761090122 | 8.872200000  |
| O | 6.494400000 | 7.761090122 | 5.914800000  |
| O | 3.247200000 | 8.474889884 | 2.957400000  |
| O | 3.247200000 | 8.474889884 | 0.000000000  |
| O | 3.247200000 | 8.474889884 | 8.872200000  |
| O | 3.247200000 | 8.474889884 | 5.914800000  |
| O | 9.741600000 | 8.474889884 | 2.957400000  |
| O | 9.741600000 | 8.474889884 | 0.000000000  |
| O | 9.741600000 | 8.474889884 | 8.872200000  |
| O | 9.741600000 | 8.474889884 | 5.914800000  |
| O | 1.268934971 | 9.790246819 | 1.479591597  |
| O | 1.269154871 | 9.788735549 | 4.436321332  |
| O | 5.210574928 | 9.772878110 | 1.483053766  |
| O | 5.210940044 | 9.771123952 | 4.442855175  |
| O | 1.270527398 | 9.789957495 | 7.394171921  |
| O | 1.269762098 | 9.790391123 | 10.352576373 |
| O | 5.212044741 | 9.772393047 | 7.400149300  |
| O | 5.211163711 | 9.769662688 | 10.357307148 |
| O | 7.758964500 | 9.781657834 | 1.484104116  |

|   |              |              |              |
|---|--------------|--------------|--------------|
| O | 7.759214924  | 9.780246578  | 4.440897967  |
| O | 11.701097512 | 9.782116823  | 1.479129651  |
| O | 11.701403788 | 9.780899878  | 4.437264861  |
| O | 7.760545496  | 9.781000962  | 7.400310064  |
| O | 7.760473928  | 9.779201798  | 10.357689007 |
| O | 11.702732672 | 9.781924298  | 7.394890451  |
| O | 11.702637334 | 9.781982877  | 10.351285645 |
| O | 9.725072921  | 11.074937943 | 2.960384371  |
| O | 9.724325545  | 11.075064031 | 0.002530706  |
| O | 3.242441943  | 11.075441223 | 2.959352594  |
| O | 3.243889285  | 11.075685541 | 0.001402636  |
| O | 3.243737446  | 11.074756490 | 8.874354170  |
| O | 3.242063579  | 11.075238339 | 5.915849522  |
| O | 9.725301134  | 11.074184630 | 8.875390561  |
| O | 9.725258011  | 11.074876863 | 5.916815409  |
| O | 6.463263898  | 11.788366942 | 8.893640440  |
| O | -0.029373522 | 11.802540231 | 2.956299492  |
| O | 6.462885664  | 11.794713489 | -0.002370415 |
| O | 6.463055947  | 11.778709960 | 5.923209544  |
| O | -0.029092704 | 11.803343193 | -0.001426295 |
| O | -0.028660696 | 11.802194471 | 5.912640980  |
| O | 6.462283374  | 11.784001012 | 2.956359350  |

|   |              |              |              |
|---|--------------|--------------|--------------|
| O | -0.028235313 | 11.803466067 | 8.871874095  |
| O | 8.432079055  | 13.094159407 | 1.486542907  |
| O | 8.429502857  | 13.090831470 | 4.441806126  |
| O | 10.967687647 | 13.119420937 | 1.486748742  |
| O | 10.966368375 | 13.121977344 | 4.440704790  |
| O | 1.957383455  | 13.102534435 | 1.483774425  |
| O | 1.957970938  | 13.104789731 | 4.438867062  |
| O | 4.492402355  | 13.114349557 | 1.484886053  |
| O | 4.495389390  | 13.109817534 | 4.439918950  |
| O | 1.957288896  | 13.101422861 | 7.394538166  |
| O | 1.956946382  | 13.101967575 | 10.354450536 |
| O | 4.493742540  | 13.109792173 | 7.395916314  |
| O | 4.491138675  | 13.124708417 | 10.353975105 |
| O | 8.431674454  | 13.090219604 | 7.398183694  |
| O | 8.434189865  | 13.103397048 | 10.356622214 |
| O | 10.967728952 | 13.117966818 | 7.396344782  |
| O | 10.968360727 | 13.118252570 | 10.357016140 |
| O | -0.031066092 | 14.416901954 | 2.967724638  |
| O | -0.031010500 | 14.415733944 | 5.924710602  |
| O | -0.032058177 | 14.417593474 | 8.881914704  |
| O | -0.032149228 | 14.417912801 | 0.011149516  |
| O | 6.462821370  | 14.392980243 | 2.970206370  |

|   |              |              |              |
|---|--------------|--------------|--------------|
| O | 6.464707733  | 14.379237368 | 5.918822182  |
| O | 6.461995022  | 14.397605136 | 8.865232602  |
| O | 6.462756945  | 14.414690235 | 0.019711189  |
| O | 9.696118418  | 15.113191918 | 8.871702565  |
| O | 3.183585014  | 15.117513914 | 8.869326354  |
| O | 9.682644746  | 15.125073835 | 5.917384176  |
| O | 9.677344926  | 15.127747043 | 2.968432403  |
| O | 3.205142785  | 15.128784679 | 2.966784658  |
| O | 9.690880814  | 15.117279598 | 0.019762885  |
| O | 3.185591004  | 15.118786581 | 0.016592788  |
| O | 3.197441726  | 15.126610108 | 5.915721644  |
| O | 1.231128601  | 16.486199992 | 10.358104581 |
| O | 5.174712722  | 16.461256360 | 4.452255685  |
| O | 5.163131908  | 16.428444554 | 7.397178414  |
| O | 7.719321513  | 16.471867039 | 1.486352805  |
| O | 7.714886227  | 16.468378724 | 4.447425304  |
| O | 5.153158587  | 16.396834333 | 10.358567119 |
| O | 11.646890573 | 16.479024764 | 1.493489957  |
| O | 11.648531708 | 16.473385810 | 4.445066482  |
| O | 1.239613794  | 16.485853160 | 4.443184274  |
| O | 1.236888484  | 16.492650481 | 1.491723916  |
| O | 5.164708488  | 16.455363444 | 1.487123976  |

|   |              |              |              |
|---|--------------|--------------|--------------|
| O | 7.722454931  | 16.438394788 | 7.404552277  |
| O | 7.726838002  | 16.413463659 | 10.356997449 |
| O | 1.236043173  | 16.487701260 | 7.394867029  |
| O | 11.648627436 | 16.476489431 | 7.392895034  |
| O | 11.649052429 | 16.474628473 | 10.357349143 |
| O | 3.220582052  | 17.748516750 | 8.879331474  |
| O | 3.224600917  | 17.749960868 | 0.002689105  |
| O | 9.659660805  | 17.772197358 | 2.981481635  |
| O | 9.648126880  | 17.775770327 | 5.919454001  |
| O | 3.231308853  | 17.773334293 | 2.978985826  |
| O | 3.232778405  | 17.774479444 | 5.916363400  |
| O | 9.660818886  | 17.740531059 | 8.879762545  |
| O | 9.660515857  | 17.750450218 | 0.001031659  |
| O | 6.427629255  | 18.480617486 | -0.117105232 |
| O | 6.454680769  | 18.499630696 | 6.017611054  |
| O | -0.064157658 | 18.513184975 | 0.020824355  |
| O | 6.431444975  | 18.477500291 | 2.953997097  |
| O | -0.058663136 | 18.528262668 | 5.913349454  |
| O | 6.425991627  | 18.432484382 | 8.957122806  |
| O | -0.062079320 | 18.515240245 | 8.866576090  |
| O | -0.064450555 | 18.526079882 | 2.985353345  |
| O | 2.035922832  | 20.002101476 | 4.451330847  |



|   |              |              |              |
|---|--------------|--------------|--------------|
| O | 4.482617243  | 19.956895185 | 1.505118809  |
| O | 4.622971358  | 20.093325236 | 4.460594370  |
| O | 2.004019611  | 19.968925336 | 7.383379186  |
| O | 1.965076721  | 19.913906686 | 10.359186871 |
| O | 4.518250457  | 19.965102334 | 7.391384513  |
| O | 4.423135812  | 19.994814806 | 10.348222843 |
| O | 8.390412674  | 19.945941605 | 1.508134174  |
| O | 8.246814606  | 20.093537406 | 4.453670268  |
| O | 10.876355082 | 19.955962920 | 1.504805916  |
| O | 10.833499056 | 20.010207540 | 4.456884016  |
| O | 8.357573220  | 20.002855861 | 7.397915280  |
| O | 8.445791072  | 20.003832418 | 10.339136054 |
| O | 10.866384489 | 19.966306778 | 7.381696780  |
| O | 10.903972518 | 19.919526709 | 10.358539201 |
| O | 1.989680106  | 19.944211021 | 1.508606175  |
| O | -0.059563390 | 21.121131570 | 2.971143156  |
| O | -0.058251001 | 21.124953143 | 5.925410796  |
| O | -0.060542226 | 21.111983227 | 8.881044164  |
| O | -0.057109416 | 21.109998681 | 0.013735703  |
| O | 6.428593414  | 21.215387514 | 8.805691150  |
| O | 6.449078180  | 21.329500706 | -0.079153628 |
| H | 0.000000000  | 0.932899949  | 9.814800036  |

|   |              |              |              |
|---|--------------|--------------|--------------|
| H | 0.816399984  | 0.932899949  | 8.400899982  |
| H | 6.457700016  | 0.932899949  | 6.856699960  |
| H | 0.834099951  | 0.932899949  | -0.439200043 |
| H | 0.000000000  | 0.932899949  | 3.900000036  |
| H | 0.816399984  | 0.932899949  | 2.486099982  |
| H | 6.457700016  | 0.932899949  | 0.941899960  |
| H | 0.834099951  | 0.932899949  | 5.475599957  |
| H | 6.494400000  | 0.932899949  | 9.814800036  |
| H | 7.310799984  | 0.932899949  | 8.400899982  |
| H | -0.036699984 | 0.932899949  | 6.856699960  |
| H | 7.328499951  | 0.932899949  | -0.439200043 |
| H | 6.494400000  | 0.932899949  | 3.900000036  |
| H | 7.310799984  | 0.932899949  | 2.486099982  |
| H | -0.036699984 | 0.932899949  | 0.941899960  |
| H | 7.328499951  | 0.932899949  | 5.475599957  |
| H | 7.205305859  | 21.799896734 | 8.789554747  |
| H | 6.436919884  | 21.373537200 | 1.347055834  |

TS9-G1

|    |             |             |             |
|----|-------------|-------------|-------------|
| Ti | 3.247200000 | 3.247190143 | 1.478700000 |
| Ti | 3.247200000 | 3.247190143 | 4.436100000 |
| Ti | 0.000000000 | 3.247190143 | 2.957400000 |
| Ti | 0.000000000 | 3.247190143 | 0.000000000 |

|    |             |             |              |
|----|-------------|-------------|--------------|
| Ti | 3.247200000 | 3.247190143 | 7.393500000  |
| Ti | 3.247200000 | 3.247190143 | 10.350900000 |
| Ti | 0.000000000 | 3.247190143 | 8.872200000  |
| Ti | 0.000000000 | 3.247190143 | 5.914800000  |
| Ti | 9.741600000 | 3.247190143 | 1.478700000  |
| Ti | 9.741600000 | 3.247190143 | 4.436100000  |
| Ti | 6.494400000 | 3.247190143 | 2.957400000  |
| Ti | 6.494400000 | 3.247190143 | 0.000000000  |
| Ti | 9.741600000 | 3.247190143 | 7.393500000  |
| Ti | 9.741600000 | 3.247190143 | 10.350900000 |
| Ti | 6.494400000 | 3.247190143 | 8.872200000  |
| Ti | 6.494400000 | 3.247190143 | 5.914800000  |
| Ti | 0.000000000 | 6.494389931 | 4.436100000  |
| Ti | 0.000000000 | 6.494389931 | 1.478700000  |
| Ti | 3.247200000 | 6.494389931 | 2.957400000  |
| Ti | 3.247200000 | 6.494389931 | 0.000000000  |
| Ti | 0.000000000 | 6.494389931 | 10.350900000 |
| Ti | 0.000000000 | 6.494389931 | 7.393500000  |
| Ti | 3.247200000 | 6.494389931 | 8.872200000  |
| Ti | 3.247200000 | 6.494389931 | 5.914800000  |
| Ti | 6.494400000 | 6.494389931 | 4.436100000  |
| Ti | 6.494400000 | 6.494389931 | 1.478700000  |

|    |              |             |              |
|----|--------------|-------------|--------------|
| Ti | 9.741600000  | 6.494389931 | 2.957400000  |
| Ti | 9.741600000  | 6.494389931 | 0.000000000  |
| Ti | 6.494400000  | 6.494389931 | 10.350900000 |
| Ti | 6.494400000  | 6.494389931 | 7.393500000  |
| Ti | 9.741600000  | 6.494389931 | 8.872200000  |
| Ti | 9.741600000  | 6.494389931 | 5.914800000  |
| Ti | 3.226554692  | 9.737780289 | 1.479071331  |
| Ti | 3.231427700  | 9.738282855 | 4.436635763  |
| Ti | -0.012502759 | 9.838024161 | 2.962559007  |
| Ti | -0.012268961 | 9.837914861 | 0.003034411  |
| Ti | 3.231081938  | 9.737908163 | 7.393352603  |
| Ti | 3.227301548  | 9.736822664 | 10.351262459 |
| Ti | -0.008771467 | 9.838673175 | 8.873222787  |
| Ti | -0.011201541 | 9.838720324 | 5.916706458  |
| Ti | 9.740709488  | 9.738505742 | 1.483598992  |
| Ti | 9.735979097  | 9.739450866 | 4.439519819  |
| Ti | 6.479879950  | 9.752366490 | 2.966391324  |
| Ti | 6.485196916  | 9.769576963 | 0.010622863  |
| Ti | 9.741309570  | 9.737698493 | 7.396695766  |
| Ti | 9.742455572  | 9.735856823 | 10.355106014 |
| Ti | 6.482963751  | 9.773733937 | 8.890111079  |
| Ti | 6.485563589  | 9.741259675 | 5.931811083  |

|    |              |              |              |
|----|--------------|--------------|--------------|
| Ti | -0.031193512 | 13.177305678 | 1.516214146  |
| Ti | -0.031956345 | 13.177182805 | 4.473740486  |
| Ti | 3.212907750  | 12.994933883 | 2.960920489  |
| Ti | 3.213912693  | 12.996211551 | 5.918224669  |
| Ti | 6.459295430  | 13.088665115 | 1.436671561  |
| Ti | 6.462398324  | 12.999522343 | 4.435038885  |
| Ti | 9.707547263  | 12.997364202 | 2.965964157  |
| Ti | 9.715542389  | 12.997833549 | 5.924427638  |
| Ti | -0.031518752 | 13.178803732 | 7.430547941  |
| Ti | -0.032954534 | 13.177025284 | 10.387587967 |
| Ti | 3.213317416  | 12.993434401 | 8.874690722  |
| Ti | 3.210304794  | 12.994028764 | 0.001451965  |
| Ti | 6.463145440  | 13.051101613 | 7.441381607  |
| Ti | 6.462804744  | 13.169366779 | 10.382151792 |
| Ti | 9.708138903  | 12.993426900 | 8.881102720  |
| Ti | 9.715885034  | 12.994753502 | 0.009427363  |
| Ti | 9.693210615  | 16.314202416 | 1.492112755  |
| Ti | 9.690919521  | 16.320842930 | 4.448678532  |
| Ti | 6.442113326  | 16.278947431 | 2.957871410  |
| Ti | -0.054717268 | 16.648131246 | 5.922610612  |
| Ti | 3.178544710  | 16.313063338 | 1.492728486  |
| Ti | 3.190311004  | 16.320766849 | 4.448037604  |

|    |              |              |              |
|----|--------------|--------------|--------------|
| Ti | -0.055332028 | 16.645853447 | 2.973351151  |
| Ti | 6.440567529  | 16.288873020 | 5.934538042  |
| Ti | 3.176909031  | 16.321812700 | 7.406360786  |
| Ti | 3.170325138  | 16.312774728 | 10.365209557 |
| Ti | -0.059419084 | 16.647225056 | 8.882977949  |
| Ti | 6.432876600  | 16.601888033 | 0.023278169  |
| Ti | 9.695480278  | 16.324927752 | 7.408112632  |
| Ti | 9.695073469  | 16.314647474 | 10.365486725 |
| Ti | 6.434431360  | 16.428402405 | 8.913495832  |
| Ti | -0.061316358 | 16.645016909 | 0.017362895  |
| Ti | 6.426400125  | 19.533028836 | 7.473723379  |
| Ti | 6.421777281  | 20.091373908 | 10.209463883 |
| Ti | 3.185044176  | 19.568220598 | 8.889483519  |
| Ti | 3.192873305  | 19.566511445 | 0.014771858  |
| Ti | 6.423269435  | 19.930933564 | 1.285294321  |
| Ti | 6.427618085  | 19.523539376 | 4.260257491  |
| Ti | 3.196234417  | 19.577609330 | 2.970659089  |
| Ti | 3.213371060  | 19.575886604 | 5.931305368  |
| Ti | -0.074881991 | 20.007247152 | 1.494421657  |
| Ti | -0.070435795 | 20.011030863 | 4.449693038  |
| Ti | 9.655200840  | 19.577669695 | 2.973283841  |
| Ti | 9.647094920  | 19.576282370 | 5.935103616  |

|    |              |              |              |
|----|--------------|--------------|--------------|
| Ti | -0.069204456 | 20.012660719 | 7.404373768  |
| Ti | -0.072697664 | 20.006224517 | 10.366340704 |
| Ti | 9.668376809  | 19.570455891 | 8.892312923  |
| Ti | 9.653158871  | 19.567395133 | 0.017013804  |
| O  | 0.000000000  | 1.266689833  | 2.957400000  |
| O  | 0.000000000  | 1.266689833  | 0.000000000  |
| O  | 0.000000000  | 1.266689833  | 8.872200000  |
| O  | 0.000000000  | 1.266689833  | 5.914800000  |
| O  | 6.494400000  | 1.266689833  | 2.957400000  |
| O  | 6.494400000  | 1.266689833  | 0.000000000  |
| O  | 6.494400000  | 1.266689833  | 8.872200000  |
| O  | 6.494400000  | 1.266689833  | 5.914800000  |
| O  | 9.741600000  | 1.980499953  | 8.872200000  |
| O  | 9.741600000  | 1.980499953  | 5.914800000  |
| O  | 9.741600000  | 1.980499953  | 2.957400000  |
| O  | 9.741600000  | 1.980499953  | 0.000000000  |
| O  | 3.247200000  | 1.980499953  | 8.872200000  |
| O  | 3.247200000  | 1.980499953  | 5.914800000  |
| O  | 3.247200000  | 1.980499953  | 2.957400000  |
| O  | 3.247200000  | 1.980499953  | 0.000000000  |
| O  | 1.266699988  | 3.247190143  | 1.478700000  |
| O  | 1.266699988  | 3.247190143  | 4.436100000  |

|   |              |             |              |
|---|--------------|-------------|--------------|
| O | 5.227599998  | 3.247190143 | 1.478700000  |
| O | 5.227599998  | 3.247190143 | 4.436100000  |
| O | 1.266699988  | 3.247190143 | 7.393500000  |
| O | 1.266699988  | 3.247190143 | 10.350900000 |
| O | 5.227599998  | 3.247190143 | 7.393500000  |
| O | 5.227599998  | 3.247190143 | 10.350900000 |
| O | 7.761099988  | 3.247190143 | 1.478700000  |
| O | 7.761099988  | 3.247190143 | 4.436100000  |
| O | 11.721999998 | 3.247190143 | 1.478700000  |
| O | 11.721999998 | 3.247190143 | 4.436100000  |
| O | 7.761099988  | 3.247190143 | 7.393500000  |
| O | 7.761099988  | 3.247190143 | 10.350900000 |
| O | 11.721999998 | 3.247190143 | 7.393500000  |
| O | 11.721999998 | 3.247190143 | 10.350900000 |
| O | 9.741600000  | 4.513899978 | 8.872200000  |
| O | 9.741600000  | 4.513899978 | 5.914800000  |
| O | 9.741600000  | 4.513899978 | 2.957400000  |
| O | 9.741600000  | 4.513899978 | 0.000000000  |
| O | 3.247200000  | 4.513899978 | 8.872200000  |
| O | 3.247200000  | 4.513899978 | 5.914800000  |
| O | 3.247200000  | 4.513899978 | 2.957400000  |
| O | 3.247200000  | 4.513899978 | 0.000000000  |



|   |              |             |              |
|---|--------------|-------------|--------------|
| O | 0.000000000  | 5.227600085 | 2.957400000  |
| O | 0.000000000  | 5.227600085 | 0.000000000  |
| O | 0.000000000  | 5.227600085 | 8.872200000  |
| O | 0.000000000  | 5.227600085 | 5.914800000  |
| O | 6.494400000  | 5.227600085 | 0.000000000  |
| O | 6.494400000  | 5.227600085 | 2.957400000  |
| O | 6.494400000  | 5.227600085 | 8.872200000  |
| O | 6.494400000  | 5.227600085 | 5.914800000  |
| O | 8.474900012  | 6.494389931 | 7.393500000  |
| O | 11.008299988 | 6.494389931 | 7.393500000  |
| O | 8.474900012  | 6.494389931 | 10.350900000 |
| O | 11.008299988 | 6.494389931 | 10.350900000 |
| O | 8.474900012  | 6.494389931 | 1.478700000  |
| O | 11.008299988 | 6.494389931 | 1.478700000  |
| O | 8.474900012  | 6.494389931 | 4.436100000  |
| O | 11.008299988 | 6.494389931 | 4.436100000  |
| O | 1.980500012  | 6.494389931 | 1.478700000  |
| O | 4.513899988  | 6.494389931 | 1.478700000  |
| O | 1.980500012  | 6.494389931 | 4.436100000  |
| O | 4.513899988  | 6.494389931 | 4.436100000  |
| O | 1.980500012  | 6.494389931 | 7.393500000  |
| O | 4.513899988  | 6.494389931 | 7.393500000  |

|   |             |             |              |
|---|-------------|-------------|--------------|
| O | 1.980500012 | 6.494389931 | 10.350900000 |
| O | 4.513899988 | 6.494389931 | 10.350900000 |
| O | 0.000000000 | 7.761090122 | 8.872200000  |
| O | 0.000000000 | 7.761090122 | 5.914800000  |
| O | 6.494400000 | 7.761090122 | 2.957400000  |
| O | 6.494400000 | 7.761090122 | 0.000000000  |
| O | 0.000000000 | 7.761090122 | 2.957400000  |
| O | 0.000000000 | 7.761090122 | 0.000000000  |
| O | 6.494400000 | 7.761090122 | 8.872200000  |
| O | 6.494400000 | 7.761090122 | 5.914800000  |
| O | 3.247200000 | 8.474889884 | 2.957400000  |
| O | 3.247200000 | 8.474889884 | 0.000000000  |
| O | 3.247200000 | 8.474889884 | 8.872200000  |
| O | 3.247200000 | 8.474889884 | 5.914800000  |
| O | 9.741600000 | 8.474889884 | 2.957400000  |
| O | 9.741600000 | 8.474889884 | 0.000000000  |
| O | 9.741600000 | 8.474889884 | 8.872200000  |
| O | 9.741600000 | 8.474889884 | 5.914800000  |
| O | 1.270268791 | 9.786977104 | 1.480776095  |
| O | 1.270505317 | 9.786365238 | 4.438248492  |
| O | 5.211588704 | 9.772434481 | 1.483796901  |
| O | 5.212060457 | 9.769477664 | 4.444997752  |

|   |              |              |              |
|---|--------------|--------------|--------------|
| O | 1.271233989  | 9.786601697  | 7.395386466  |
| O | 1.270925635  | 9.787179988  | 10.353439579 |
| O | 5.212170732  | 9.772238026  | 7.400308171  |
| O | 5.211775223  | 9.772860608  | 10.357318741 |
| O | 7.759853843  | 9.781205989  | 1.484925209  |
| O | 7.759330004  | 9.779006058  | 4.444057062  |
| O | 11.701203241 | 9.777398347  | 1.480728422  |
| O | 11.701215450 | 9.776805769  | 4.438619113  |
| O | 7.760217529  | 9.780908450  | 7.400369212  |
| O | 7.760514583  | 9.781557107  | 10.356804508 |
| O | 11.702018548 | 9.776974362  | 7.396214538  |
| O | 11.701838653 | 9.777387988  | 10.352357998 |
| O | 9.725820686  | 11.070924916 | 2.962503999  |
| O | 9.725524152  | 11.071136015 | 0.003269583  |
| O | 3.243989688  | 11.070285904 | 2.961276323  |
| O | 3.244653286  | 11.071009213 | 0.002318247  |
| O | 3.244383509  | 11.070682027 | 8.874772701  |
| O | 3.245190373  | 11.071024215 | 5.917954245  |
| O | 9.724900819  | 11.070978852 | 8.875508503  |
| O | 9.725920830  | 11.071878255 | 5.919332393  |
| O | 6.464534203  | 11.802198400 | 8.886553682  |
| O | -0.030288842 | 11.794645623 | 2.960659646  |

|   |              |              |              |
|---|--------------|--------------|--------------|
| O | 6.463954772  | 11.798370755 | 0.001094475  |
| O | 6.463478863  | 11.792563564 | 5.934648294  |
| O | -0.030190777 | 11.794702059 | 0.002020022  |
| O | -0.030498871 | 11.794638480 | 5.918003811  |
| O | 6.462956064  | 11.782793711 | 2.969063512  |
| O | -0.029083612 | 11.795124615 | 8.874681613  |
| O | 8.437852447  | 13.089205185 | 1.491691976  |
| O | 8.433459375  | 13.089764545 | 4.448944698  |
| O | 10.968605176 | 13.110673718 | 1.488757999  |
| O | 10.967899365 | 13.114796402 | 4.446243527  |
| O | 1.956523856  | 13.090018149 | 1.485901742  |
| O | 1.957221355  | 13.092270588 | 4.445405163  |
| O | 4.486976674  | 13.109436770 | 1.490178497  |
| O | 4.491965412  | 13.109481061 | 4.445387774  |
| O | 1.957062761  | 13.093347872 | 7.399126276  |
| O | 1.956219269  | 13.091116508 | 10.356524738 |
| O | 4.490244526  | 13.112582182 | 7.400564755  |
| O | 4.486448030  | 13.119408078 | 10.356039133 |
| O | 8.435403279  | 13.094964156 | 7.400947206  |
| O | 8.438368882  | 13.099008258 | 10.358459824 |
| O | 10.968432425 | 13.114647096 | 7.402773223  |
| O | 10.968498278 | 13.111443819 | 10.357719173 |

|   |              |              |              |
|---|--------------|--------------|--------------|
| O | -0.029833325 | 14.405411875 | 2.971648043  |
| O | -0.030258449 | 14.406160187 | 5.929226197  |
| O | -0.030565894 | 14.407342485 | 8.886622648  |
| O | -0.031347430 | 14.406129826 | 0.014266971  |
| O | 6.464543165  | 14.378302245 | 2.981139050  |
| O | 6.461654066  | 14.406011596 | 5.932125750  |
| O | 6.461680174  | 14.423712134 | 8.875201051  |
| O | 6.463964774  | 14.390987481 | 0.023260306  |
| O | 9.682571100  | 15.118013623 | 8.882036312  |
| O | 3.188828333  | 15.116378408 | 8.881246213  |
| O | 9.680291046  | 15.119845649 | 5.933515492  |
| O | 9.692780946  | 15.113141912 | 2.975599485  |
| O | 3.180389250  | 15.112355380 | 2.975258911  |
| O | 9.697463928  | 15.111234876 | 0.014409044  |
| O | 3.176206077  | 15.110778744 | 0.014371899  |
| O | 3.194716416  | 15.118022195 | 5.931771572  |
| O | 1.227926991  | 16.483672874 | 10.365451473 |
| O | 5.160595325  | 16.415854687 | 4.452198666  |
| O | 5.162215158  | 16.473098272 | 7.416711568  |
| O | 7.725785779  | 16.411131924 | 1.495043184  |
| O | 7.720508949  | 16.433577727 | 4.453029459  |
| O | 5.152724112  | 16.418850437 | 10.379255788 |

|   |              |              |              |
|---|--------------|--------------|--------------|
| O | 11.649116074 | 16.463346278 | 1.497973612  |
| O | 11.649597829 | 16.460978110 | 4.452288808  |
| O | 1.231757778  | 16.476779826 | 4.451722288  |
| O | 1.229326924  | 16.480741775 | 1.495383876  |
| O | 5.153524222  | 16.392602349 | 1.497531659  |
| O | 7.715533589  | 16.490837386 | 7.417381833  |
| O | 7.722927464  | 16.436780291 | 10.379164227 |
| O | 1.230109110  | 16.480429234 | 7.405351721  |
| O | 11.649009307 | 16.464998994 | 7.404555116  |
| O | 11.648573662 | 16.467003186 | 10.364959953 |
| O | 3.205051214  | 17.739164094 | 8.889819834  |
| O | 3.220311495  | 17.737223125 | 0.023069968  |
| O | 9.662337407  | 17.747780225 | 2.977880350  |
| O | 9.670924952  | 17.748895371 | 5.921288181  |
| O | 3.218942476  | 17.747324094 | 2.977005314  |
| O | 3.212039968  | 17.747369814 | 5.920092208  |
| O | 9.676405706  | 17.741272585 | 8.891446404  |
| O | 9.661571587  | 17.738305053 | 0.024487627  |
| O | 6.423336976  | 18.479732013 | 0.069603592  |
| O | 6.426594437  | 18.521647514 | 5.869690305  |
| O | -0.073194356 | 18.509994199 | 0.025586478  |
| O | 6.425487792  | 18.391137170 | 2.906774044  |

|   |              |              |              |
|---|--------------|--------------|--------------|
| O | -0.068416166 | 18.518921799 | 5.924936429  |
| O | 6.422586613  | 18.485314888 | 9.059775461  |
| O | -0.071667003 | 18.514240828 | 8.874553262  |
| O | -0.070088084 | 18.514724820 | 2.985060326  |
| O | 1.994873028  | 19.958548260 | 4.450414289  |
| O | 4.430892334  | 19.988282877 | 1.507314738  |
| O | 4.507923841  | 19.996287499 | 4.446242699  |
| O | 1.980460526  | 19.952426385 | 7.393147951  |
| O | 1.948815393  | 19.897024113 | 10.369676533 |
| O | 4.457981256  | 19.901033210 | 7.394765885  |
| O | 4.391774355  | 19.974460348 | 10.363531174 |
| O | 8.418735142  | 19.975691581 | 1.509379949  |
| O | 8.348719145  | 19.990255279 | 4.448595133  |
| O | 10.882413448 | 19.938847102 | 1.505999759  |
| O | 10.859637327 | 19.966887926 | 4.450899184  |
| O | 8.398174910  | 19.892930004 | 7.396655546  |
| O | 8.455113264  | 19.960263842 | 10.364015951 |
| O | 10.873538201 | 19.963830739 | 7.395769864  |
| O | 10.899293043 | 19.914780729 | 10.373064530 |
| O | 1.964945664  | 19.922233136 | 1.505767189  |
| O | -0.065674620 | 21.118644815 | 2.974883321  |
| O | -0.064964522 | 21.121414108 | 5.925975778  |

|   |              |              |              |
|---|--------------|--------------|--------------|
| O | -0.064346515 | 21.116025186 | 8.885919615  |
| O | -0.063920353 | 21.115362956 | 0.017892980  |
| O | 6.431486669  | 21.280215666 | 8.876841935  |
| O | 6.429844885  | 21.167244409 | 0.007447443  |
| H | 0.000000000  | 0.932899949  | 9.814800036  |
| H | 0.816399984  | 0.932899949  | 8.400899982  |
| H | 6.457700016  | 0.932899949  | 6.856699960  |
| H | 0.834099951  | 0.932899949  | -0.439200043 |
| H | 0.000000000  | 0.932899949  | 3.900000036  |
| H | 0.816399984  | 0.932899949  | 2.486099982  |
| H | 6.457700016  | 0.932899949  | 0.941899960  |
| H | 0.834099951  | 0.932899949  | 5.475599957  |
| H | 6.494400000  | 0.932899949  | 9.814800036  |
| H | 7.310799984  | 0.932899949  | 8.400899982  |
| H | -0.036699984 | 0.932899949  | 6.856699960  |
| H | 7.328499951  | 0.932899949  | -0.439200043 |
| H | 6.494400000  | 0.932899949  | 3.900000036  |
| H | 7.310799984  | 0.932899949  | 2.486099982  |
| H | -0.036699984 | 0.932899949  | 0.941899960  |
| H | 7.328499951  | 0.932899949  | 5.475599957  |
| H | 6.429447687  | 21.279271613 | 7.474726411  |
| H | 6.429268572  | 20.862134004 | 2.954368310  |



9-Ge:

|    |             |             |              |
|----|-------------|-------------|--------------|
| Ti | 3.247200000 | 3.247194072 | 1.478700000  |
| Ti | 3.247200000 | 3.247194072 | 4.436100000  |
| Ti | 0.000000000 | 3.247194072 | 2.957400000  |
| Ti | 0.000000000 | 3.247194072 | 0.000000000  |
| Ti | 3.247200000 | 3.247194072 | 7.393500000  |
| Ti | 3.247200000 | 3.247194072 | 10.350900000 |
| Ti | 0.000000000 | 3.247194072 | 8.872200000  |
| Ti | 0.000000000 | 3.247194072 | 5.914800000  |
| Ti | 9.741600000 | 3.247194072 | 1.478700000  |
| Ti | 9.741600000 | 3.247194072 | 4.436100000  |
| Ti | 6.494400000 | 3.247194072 | 2.957400000  |
| Ti | 6.494400000 | 3.247194072 | 0.000000000  |
| Ti | 9.741600000 | 3.247194072 | 7.393500000  |
| Ti | 9.741600000 | 3.247194072 | 10.350900000 |
| Ti | 6.494400000 | 3.247194072 | 8.872200000  |
| Ti | 6.494400000 | 3.247194072 | 5.914800000  |
| Ti | 0.000000000 | 6.494391717 | 4.436100000  |
| Ti | 0.000000000 | 6.494391717 | 1.478700000  |
| Ti | 3.247200000 | 6.494391717 | 2.957400000  |
| Ti | 3.247200000 | 6.494391717 | 0.000000000  |
| Ti | 0.000000000 | 6.494391717 | 10.350900000 |

|    |              |             |              |
|----|--------------|-------------|--------------|
| Ti | 0.000000000  | 6.494391717 | 7.393500000  |
| Ti | 3.247200000  | 6.494391717 | 8.872200000  |
| Ti | 3.247200000  | 6.494391717 | 5.914800000  |
| Ti | 6.494400000  | 6.494391717 | 4.436100000  |
| Ti | 6.494400000  | 6.494391717 | 1.478700000  |
| Ti | 9.741600000  | 6.494391717 | 2.957400000  |
| Ti | 9.741600000  | 6.494391717 | 0.000000000  |
| Ti | 6.494400000  | 6.494391717 | 10.350900000 |
| Ti | 6.494400000  | 6.494391717 | 7.393500000  |
| Ti | 9.741600000  | 6.494391717 | 8.872200000  |
| Ti | 9.741600000  | 6.494391717 | 5.914800000  |
| Ti | 3.226297903  | 9.734426635 | 1.479385999  |
| Ti | 3.232850883  | 9.737388809 | 4.436917662  |
| Ti | -0.012513540 | 9.837780558 | 2.960990402  |
| Ti | -0.014214683 | 9.839017149 | 0.003139694  |
| Ti | 3.232404848  | 9.737028405 | 7.393358518  |
| Ti | 3.226117879  | 9.734209106 | 10.350850197 |
| Ti | -0.009154246 | 9.838490651 | 8.872521055  |
| Ti | -0.009075924 | 9.837681259 | 5.915403664  |
| Ti | 9.737678551  | 9.735178162 | 1.484220993  |
| Ti | 9.736620094  | 9.738178556 | 4.439201721  |
| Ti | 6.480988415  | 9.760178944 | 2.966532333  |

|    |              |              |              |
|----|--------------|--------------|--------------|
| Ti | 6.481968679  | 9.794353429  | 0.010133354  |
| Ti | 9.740962380  | 9.734330908  | 7.396685830  |
| Ti | 9.741260473  | 9.733836557  | 10.355568197 |
| Ti | 6.484025196  | 9.787974020  | 8.889123544  |
| Ti | 6.486247190  | 9.765414988  | 5.931143657  |
| Ti | -0.032000896 | 13.176451994 | 1.514152720  |
| Ti | -0.032617085 | 13.175831199 | 4.471212974  |
| Ti | 3.213013089  | 12.989035609 | 2.959384889  |
| Ti | 3.212258699  | 12.991634879 | 5.916255632  |
| Ti | 6.462182580  | 13.096505072 | 1.459423430  |
| Ti | 6.461932936  | 13.033975793 | 4.450000371  |
| Ti | 9.712354158  | 12.994597410 | 2.963688260  |
| Ti | 9.709182293  | 12.991837762 | 5.920864681  |
| Ti | -0.033355888 | 13.175781549 | 7.428213488  |
| Ti | -0.033691518 | 13.176224107 | 10.385807375 |
| Ti | 3.210554569  | 12.989313860 | 8.875710434  |
| Ti | 3.212690187  | 12.988261579 | 0.001744866  |
| Ti | 6.457908226  | 13.097822031 | 7.445436203  |
| Ti | 6.461051516  | 13.180852929 | 10.366275996 |
| Ti | 9.709465449  | 12.987523625 | 8.877230656  |
| Ti | 9.710150738  | 12.987852954 | 0.005020955  |
| Ti | 9.695606789  | 16.307509394 | 1.489073021  |

|    |              |              |              |
|----|--------------|--------------|--------------|
| Ti | 9.691605070  | 16.313305512 | 4.444614355  |
| Ti | 6.437943531  | 16.335571292 | 2.957505047  |
| Ti | -0.054707267 | 16.644919396 | 5.919987161  |
| Ti | 3.175411682  | 16.306286734 | 1.489624044  |
| Ti | 3.180021277  | 16.311545638 | 4.444896254  |
| Ti | -0.057693652 | 16.645917027 | 2.966105994  |
| Ti | 6.436858707  | 16.336694296 | 5.934576134  |
| Ti | 3.178098545  | 16.306719648 | 7.401372362  |
| Ti | 3.175182689  | 16.309316774 | 10.360030913 |
| Ti | -0.055971207 | 16.644510414 | 8.877658414  |
| Ti | 6.435838437  | 16.534929245 | 0.008148820  |
| Ti | 9.698596032  | 16.304689381 | 7.400299772  |
| Ti | 9.698885812  | 16.309602526 | 10.359529930 |
| Ti | 6.439295925  | 16.537967143 | 8.885452464  |
| Ti | -0.056977060 | 16.645540192 | 0.007907378  |
| Ti | 6.428804092  | 19.843884281 | 7.496082269  |
| Ti | 6.420148616  | 20.024764094 | 10.368462461 |
| Ti | 3.185416954  | 19.559303356 | 8.881227641  |
| Ti | 3.178588612  | 19.559844141 | 0.017268377  |
| Ti | 6.421234999  | 19.843497087 | 1.406368975  |
| Ti | 6.419329282  | 19.496653704 | 4.447995846  |
| Ti | 3.191485322  | 19.559031178 | 2.973180095  |

|    |              |              |              |
|----|--------------|--------------|--------------|
| Ti | 3.192660029  | 19.559433730 | 5.926970056  |
| Ti | -0.076836675 | 20.009190264 | 1.491994341  |
| Ti | -0.071988735 | 20.012667149 | 4.449551911  |
| Ti | 9.653050545  | 19.560047382 | 2.977506298  |
| Ti | 9.657959791  | 19.557888528 | 5.926740680  |
| Ti | -0.074729502 | 20.008129053 | 7.406162286  |
| Ti | -0.073797426 | 20.008418734 | 10.363713586 |
| Ti | 9.665544082  | 19.559903078 | 8.885983495  |
| Ti | 9.664382753  | 19.559900577 | 0.019009812  |
| O  | 0.000000000  | 1.266694833  | 2.957400000  |
| O  | 0.000000000  | 1.266694833  | 0.000000000  |
| O  | 0.000000000  | 1.266694833  | 8.872200000  |
| O  | 0.000000000  | 1.266694833  | 5.914800000  |
| O  | 6.494400000  | 1.266694833  | 2.957400000  |
| O  | 6.494400000  | 1.266694833  | 0.000000000  |
| O  | 6.494400000  | 1.266694833  | 8.872200000  |
| O  | 6.494400000  | 1.266694833  | 5.914800000  |
| O  | 9.741600000  | 1.980495667  | 8.872200000  |
| O  | 9.741600000  | 1.980495667  | 5.914800000  |
| O  | 9.741600000  | 1.980495667  | 2.957400000  |
| O  | 9.741600000  | 1.980495667  | 0.000000000  |
| O  | 3.247200000  | 1.980495667  | 8.872200000  |

|   |              |             |              |
|---|--------------|-------------|--------------|
| O | 3.247200000  | 1.980495667 | 5.914800000  |
| O | 3.247200000  | 1.980495667 | 2.957400000  |
| O | 3.247200000  | 1.980495667 | 0.000000000  |
| O | 1.266698949  | 3.247194072 | 1.478700000  |
| O | 1.266698949  | 3.247194072 | 4.436100000  |
| O | 5.227599738  | 3.247194072 | 1.478700000  |
| O | 5.227599738  | 3.247194072 | 4.436100000  |
| O | 1.266698949  | 3.247194072 | 7.393500000  |
| O | 1.266698949  | 3.247194072 | 10.350900000 |
| O | 5.227599738  | 3.247194072 | 7.393500000  |
| O | 5.227599738  | 3.247194072 | 10.350900000 |
| O | 7.761098949  | 3.247194072 | 1.478700000  |
| O | 7.761098949  | 3.247194072 | 4.436100000  |
| O | 11.721999738 | 3.247194072 | 1.478700000  |
| O | 11.721999738 | 3.247194072 | 4.436100000  |
| O | 7.761098949  | 3.247194072 | 7.393500000  |
| O | 7.761098949  | 3.247194072 | 10.350900000 |
| O | 11.721999738 | 3.247194072 | 7.393500000  |
| O | 11.721999738 | 3.247194072 | 10.350900000 |
| O | 9.741600000  | 4.513896049 | 8.872200000  |
| O | 9.741600000  | 4.513896049 | 5.914800000  |
| O | 9.741600000  | 4.513896049 | 2.957400000  |

|   |              |             |              |
|---|--------------|-------------|--------------|
| O | 9.741600000  | 4.513896049 | 0.000000000  |
| O | 3.247200000  | 4.513896049 | 8.872200000  |
| O | 3.247200000  | 4.513896049 | 5.914800000  |
| O | 3.247200000  | 4.513896049 | 2.957400000  |
| O | 3.247200000  | 4.513896049 | 0.000000000  |
| O | 0.000000000  | 5.227596870 | 2.957400000  |
| O | 0.000000000  | 5.227596870 | 0.000000000  |
| O | 0.000000000  | 5.227596870 | 8.872200000  |
| O | 0.000000000  | 5.227596870 | 5.914800000  |
| O | 6.494400000  | 5.227596870 | 0.000000000  |
| O | 6.494400000  | 5.227596870 | 2.957400000  |
| O | 6.494400000  | 5.227596870 | 8.872200000  |
| O | 6.494400000  | 5.227596870 | 5.914800000  |
| O | 8.474899752  | 6.494391717 | 7.393500000  |
| O | 11.008298949 | 6.494391717 | 7.393500000  |
| O | 8.474899752  | 6.494391717 | 10.350900000 |
| O | 11.008298949 | 6.494391717 | 10.350900000 |
| O | 8.474899752  | 6.494391717 | 1.478700000  |
| O | 11.008298949 | 6.494391717 | 1.478700000  |
| O | 8.474899752  | 6.494391717 | 4.436100000  |
| O | 11.008298949 | 6.494391717 | 4.436100000  |
| O | 1.980499752  | 6.494391717 | 1.478700000  |

|   |             |             |              |
|---|-------------|-------------|--------------|
| O | 4.513898949 | 6.494391717 | 1.478700000  |
| O | 1.980499752 | 6.494391717 | 4.436100000  |
| O | 4.513898949 | 6.494391717 | 4.436100000  |
| O | 1.980499752 | 6.494391717 | 7.393500000  |
| O | 4.513898949 | 6.494391717 | 7.393500000  |
| O | 1.980499752 | 6.494391717 | 10.350900000 |
| O | 4.513898949 | 6.494391717 | 10.350900000 |
| O | 0.000000000 | 7.761086550 | 8.872200000  |
| O | 0.000000000 | 7.761086550 | 5.914800000  |
| O | 6.494400000 | 7.761086550 | 2.957400000  |
| O | 6.494400000 | 7.761086550 | 0.000000000  |
| O | 0.000000000 | 7.761086550 | 2.957400000  |
| O | 0.000000000 | 7.761086550 | 0.000000000  |
| O | 6.494400000 | 7.761086550 | 8.872200000  |
| O | 6.494400000 | 7.761086550 | 5.914800000  |
| O | 3.247200000 | 8.474887384 | 2.957400000  |
| O | 3.247200000 | 8.474887384 | 0.000000000  |
| O | 3.247200000 | 8.474887384 | 8.872200000  |
| O | 3.247200000 | 8.474887384 | 5.914800000  |
| O | 9.741600000 | 8.474887384 | 2.957400000  |
| O | 9.741600000 | 8.474887384 | 0.000000000  |
| O | 9.741600000 | 8.474887384 | 8.872200000  |



|   |              |              |              |
|---|--------------|--------------|--------------|
| O | 9.741600000  | 8.474887384  | 5.914800000  |
| O | 1.269964723  | 9.784650370  | 1.479634065  |
| O | 1.271208011  | 9.785893033  | 4.436737497  |
| O | 5.211002260  | 9.772840606  | 1.484731203  |
| O | 5.211992786  | 9.771508288  | 4.442204192  |
| O | 1.271831603  | 9.785697650  | 7.394589388  |
| O | 1.270776393  | 9.785680862  | 10.353049912 |
| O | 5.211926543  | 9.772995626  | 7.399111962  |
| O | 5.211310614  | 9.776453937  | 10.356918900 |
| O | 7.760115697  | 9.781853574  | 1.484668388  |
| O | 7.760489645  | 9.779821522  | 4.440869103  |
| O | 11.700788378 | 9.775771705  | 1.480233116  |
| O | 11.701675643 | 9.776180687  | 4.437672154  |
| O | 7.761206496  | 9.781556035  | 7.399488025  |
| O | 7.760726560  | 9.785327244  | 10.357376469 |
| O | 11.702262867 | 9.776087103  | 7.394816871  |
| O | 11.701500165 | 9.776410360  | 10.351422513 |
| O | 9.725797696  | 11.068869646 | 2.959777513  |
| O | 9.726537668  | 11.067647700 | 0.003464062  |
| O | 3.244020082  | 11.067712709 | 2.959014031  |
| O | 3.243694842  | 11.067625197 | 0.002824790  |
| O | 3.243809534  | 11.068187771 | 8.874144905  |

|   |              |              |              |
|---|--------------|--------------|--------------|
| O | 3.244506772  | 11.067874873 | 5.916906260  |
| O | 9.725886929  | 11.067490179 | 8.875112329  |
| O | 9.725350232  | 11.068104189 | 5.917742022  |
| O | 6.464103754  | 11.804402261 | 8.879810573  |
| O | -0.030074397 | 11.792579638 | 2.956952013  |
| O | 6.464203638  | 11.806422169 | 0.008623424  |
| O | 6.464378857  | 11.794680985 | 5.924271842  |
| O | -0.029860082 | 11.792578923 | 0.001210286  |
| O | -0.029658236 | 11.792562493 | 5.916017148  |
| O | 6.464127394  | 11.795959367 | 2.962943705  |
| O | -0.028891118 | 11.792372825 | 8.873042977  |
| O | 8.439210946  | 13.094657330 | 1.486972321  |
| O | 8.437572149  | 13.091276172 | 4.442047450  |
| O | 10.969226950 | 13.109607149 | 1.483879945  |
| O | 10.969593624 | 13.107484370 | 4.442005810  |
| O | 1.955798172  | 13.088790845 | 1.483203529  |
| O | 1.955107038  | 13.086144427 | 4.440394145  |
| O | 4.486012255  | 13.113562668 | 1.486147798  |
| O | 4.487216577  | 13.109091724 | 4.441020995  |
| O | 1.955338628  | 13.087984668 | 7.398244734  |
| O | 1.955588013  | 13.086460539 | 10.356010742 |
| O | 4.484979776  | 13.113210122 | 7.396697304  |

|   |              |              |              |
|---|--------------|--------------|--------------|
| O | 4.484577902  | 13.113082605 | 10.355914331 |
| O | 8.438343164  | 13.094202984 | 7.397774981  |
| O | 8.439406427  | 13.094297640 | 10.357712430 |
| O | 10.968859887 | 13.108114810 | 7.399813458  |
| O | 10.968778577 | 13.106747845 | 10.356377341 |
| O | -0.030289882 | 14.403991331 | 2.969415680  |
| O | -0.029971786 | 14.403776303 | 5.926714537  |
| O | -0.030028417 | 14.404394241 | 8.884655504  |
| O | -0.030384570 | 14.405135053 | 0.010660007  |
| O | 6.462808771  | 14.403082283 | 2.969898919  |
| O | 6.462157512  | 14.402369332 | 5.918460906  |
| O | 6.463097512  | 14.412828562 | 8.877940787  |
| O | 6.462362605  | 14.414605581 | 0.013762438  |
| O | 9.690859253  | 15.110847325 | 8.885466778  |
| O | 3.180962056  | 15.110723023 | 8.885221432  |
| O | 9.692001748  | 15.107362582 | 5.922831589  |
| O | 9.691267751  | 15.108307706 | 2.968679524  |
| O | 3.181917902  | 15.108078033 | 2.968407443  |
| O | 9.690728715  | 15.111552417 | 0.006224854  |
| O | 3.182132477  | 15.110883758 | 0.006231242  |
| O | 3.181628641  | 15.107661907 | 5.922812188  |
| O | 1.230202629  | 16.482855981 | 10.360187656 |

|   |              |              |              |
|---|--------------|--------------|--------------|
| O | 5.154350180  | 16.423046702 | 4.446054727  |
| O | 5.153791012  | 16.414652386 | 7.411357728  |
| O | 7.724617956  | 16.435579061 | 1.482726678  |
| O | 7.723131648  | 16.439439568 | 4.446390569  |
| O | 5.155884547  | 16.441149793 | 10.361406459 |
| O | 11.649935018 | 16.460772011 | 1.488623378  |
| O | 11.650533153 | 16.458812468 | 4.445823458  |
| O | 1.229416027  | 16.474211275 | 4.444791325  |
| O | 1.228554091  | 16.476255829 | 1.487948500  |
| O | 5.152776847  | 16.417903170 | 1.483554631  |
| O | 7.725243497  | 16.433675597 | 7.410246100  |
| O | 7.722487143  | 16.458404557 | 10.361820022 |
| O | 1.229604495  | 16.475752549 | 7.402678232  |
| O | 11.650562637 | 16.459288602 | 7.402364866  |
| O | 11.648213353 | 16.465650866 | 10.360061434 |
| O | 3.209614439  | 17.734612425 | 8.877292288  |
| O | 3.207836402  | 17.735848659 | 0.018072671  |
| O | 9.673917182  | 17.732906487 | 2.968202199  |
| O | 9.675040063  | 17.730519745 | 5.927509722  |
| O | 3.203836502  | 17.731904213 | 2.967375547  |
| O | 3.205783653  | 17.731659538 | 5.927207003  |
| O | 9.671275649  | 17.736076546 | 8.878031165  |

|   |              |              |              |
|---|--------------|--------------|--------------|
| O | 9.671459311  | 17.736251569 | 0.018778780  |
| O | 6.421448145  | 18.490512356 | 0.019704328  |
| O | 6.423407246  | 18.430365890 | 5.974496775  |
| O | -0.072628694 | 18.513180689 | 0.014876077  |
| O | 6.423426859  | 18.428608517 | 2.922347239  |
| O | -0.070641147 | 18.514044016 | 5.920455968  |
| O | 6.422655844  | 18.490109446 | 8.881778309  |
| O | -0.072243316 | 18.511991247 | 8.881936825  |
| O | -0.070783764 | 18.515515281 | 2.977213870  |
| O | 1.979277246  | 19.951737723 | 4.450229511  |
| O | 4.429241068  | 19.971975736 | 1.514839901  |
| O | 4.466596597  | 19.912336837 | 4.449305501  |
| O | 1.963479228  | 19.919991413 | 7.402794280  |
| O | 1.959474522  | 19.916754917 | 10.363484092 |
| O | 4.432604258  | 19.969099645 | 7.385712929  |
| O | 4.414260176  | 19.940103696 | 10.365326552 |
| O | 8.416338968  | 19.959723771 | 1.515934731  |
| O | 8.382305454  | 19.901059642 | 4.452393381  |
| O | 10.882886890 | 19.935980655 | 1.498739816  |
| O | 10.869319309 | 19.961328625 | 4.451238339  |
| O | 8.418028941  | 19.958872231 | 7.386456774  |
| O | 8.430593267  | 19.926899820 | 10.366530805 |

|   |              |              |              |
|---|--------------|--------------|--------------|
| O | 10.883100166 | 19.934376515 | 7.404281497  |
| O | 10.885797420 | 19.931597936 | 10.366952294 |
| O | 1.960766647  | 19.921719140 | 1.497538638  |
| O | -0.067059226 | 21.120570425 | 2.970810626  |
| O | -0.067189634 | 21.118873417 | 5.927992488  |
| O | -0.065749695 | 21.116883156 | 8.885009446  |
| O | -0.066085326 | 21.118129033 | 0.013498638  |
| O | 6.427949819  | 21.095992914 | 8.853342790  |
| O | 6.427450010  | 21.096459404 | 0.051928632  |
| H | 0.000000000  | 0.932897449  | 9.814799089  |
| H | 0.816399334  | 0.932897449  | 8.400899272  |
| H | 6.457698847  | 0.932897449  | 6.856699960  |
| H | 0.834099172  | 0.932897449  | -0.439201108 |
| H | 0.000000000  | 0.932897449  | 3.899999089  |
| H | 0.816399334  | 0.932897449  | 2.486099272  |
| H | 6.457698847  | 0.932897449  | 0.941899960  |
| H | 0.834099172  | 0.932897449  | 5.475598892  |
| H | 6.494400000  | 0.932897449  | 9.814799089  |
| H | 7.310799334  | 0.932897449  | 8.400899272  |
| H | -0.036701153 | 0.932897449  | 6.856699960  |
| H | 7.328499172  | 0.932897449  | -0.439201108 |
| H | 6.494400000  | 0.932897449  | 3.899999089  |

|   |              |              |             |
|---|--------------|--------------|-------------|
| H | 7.310799334  | 0.932897449  | 2.486099272 |
| H | -0.036701153 | 0.932897449  | 0.941899960 |
| H | 7.328499172  | 0.932897449  | 5.475598892 |
| H | 6.428841890  | 20.819695576 | 5.863091044 |
| H | 6.427990084  | 20.822278415 | 3.039808069 |

TS9-G2:

|    |             |             |              |
|----|-------------|-------------|--------------|
| Ti | 3.247200000 | 3.247190143 | 1.478700000  |
| Ti | 3.247200000 | 3.247190143 | 4.436100000  |
| Ti | 0.000000000 | 3.247190143 | 2.957400000  |
| Ti | 0.000000000 | 3.247190143 | 0.000000000  |
| Ti | 3.247200000 | 3.247190143 | 7.393500000  |
| Ti | 3.247200000 | 3.247190143 | 10.350900000 |
| Ti | 0.000000000 | 3.247190143 | 8.872200000  |
| Ti | 0.000000000 | 3.247190143 | 5.914800000  |
| Ti | 9.741600000 | 3.247190143 | 1.478700000  |
| Ti | 9.741600000 | 3.247190143 | 4.436100000  |
| Ti | 6.494400000 | 3.247190143 | 2.957400000  |
| Ti | 6.494400000 | 3.247190143 | 0.000000000  |
| Ti | 9.741600000 | 3.247190143 | 7.393500000  |
| Ti | 9.741600000 | 3.247190143 | 10.350900000 |
| Ti | 6.494400000 | 3.247190143 | 8.872200000  |
| Ti | 6.494400000 | 3.247190143 | 5.914800000  |

|    |              |             |              |
|----|--------------|-------------|--------------|
| Ti | 0.000000000  | 6.494389931 | 4.436100000  |
| Ti | 0.000000000  | 6.494389931 | 1.478700000  |
| Ti | 3.247200000  | 6.494389931 | 2.957400000  |
| Ti | 3.247200000  | 6.494389931 | 0.000000000  |
| Ti | 0.000000000  | 6.494389931 | 10.350900000 |
| Ti | 0.000000000  | 6.494389931 | 7.393500000  |
| Ti | 3.247200000  | 6.494389931 | 8.872200000  |
| Ti | 3.247200000  | 6.494389931 | 5.914800000  |
| Ti | 6.494400000  | 6.494389931 | 4.436100000  |
| Ti | 6.494400000  | 6.494389931 | 1.478700000  |
| Ti | 9.741600000  | 6.494389931 | 2.957400000  |
| Ti | 9.741600000  | 6.494389931 | 0.000000000  |
| Ti | 6.494400000  | 6.494389931 | 10.350900000 |
| Ti | 6.494400000  | 6.494389931 | 7.393500000  |
| Ti | 9.741600000  | 6.494389931 | 8.872200000  |
| Ti | 9.741600000  | 6.494389931 | 5.914800000  |
| Ti | 3.232131044  | 9.737864943 | 1.478273543  |
| Ti | 3.232271972  | 9.737472392 | 4.435798937  |
| Ti | -0.008574167 | 9.838083455 | 2.957331388  |
| Ti | -0.009223087 | 9.837760198 | 0.000268769  |
| Ti | 3.231758655  | 9.737372021 | 7.393803784  |
| Ti | 3.231565901  | 9.737835297 | 10.351061474 |



|    |              |              |              |
|----|--------------|--------------|--------------|
| Ti | -0.008791859 | 9.838015589  | 8.872187816  |
| Ti | -0.008786793 | 9.837595176  | 5.914688329  |
| Ti | 9.741534277  | 9.736181865  | 1.482368359  |
| Ti | 9.741933163  | 9.735798243  | 4.439505742  |
| Ti | 6.480866320  | 9.743408885  | 2.964817277  |
| Ti | 6.489713641  | 9.781965375  | 0.005205734  |
| Ti | 9.742399850  | 9.735875039  | 7.398485467  |
| Ti | 9.741946931  | 9.737423814  | 10.354561143 |
| Ti | 6.481141942  | 9.764375923  | 8.878148396  |
| Ti | 6.490643899  | 9.786227720  | 5.923239118  |
| Ti | -0.034700359 | 13.175414358 | 1.512395314  |
| Ti | -0.032453426 | 13.176310190 | 4.469867830  |
| Ti | 3.211405465  | 12.994343091 | 2.957622278  |
| Ti | 3.212928142  | 12.991027299 | 5.916131303  |
| Ti | 6.460869413  | 13.048446264 | 1.484998789  |
| Ti | 6.459377779  | 13.061233300 | 4.464717340  |
| Ti | 9.709947853  | 12.992615007 | 2.960869030  |
| Ti | 9.708186442  | 12.989107047 | 5.917389381  |
| Ti | -0.034148594 | 13.175405428 | 7.426908920  |
| Ti | -0.031903610 | 13.175798337 | 10.384713965 |
| Ti | 3.210900590  | 12.994657061 | 8.872296175  |
| Ti | 3.211694985  | 12.993763372 | 0.000493176  |

|    |              |              |              |
|----|--------------|--------------|--------------|
| Ti | 6.463878398  | 13.147104571 | 7.434028210  |
| Ti | 6.459822256  | 13.107711900 | 10.315999013 |
| Ti | 9.713462882  | 12.994574193 | 8.877334046  |
| Ti | 9.707527780  | 12.991738464 | 0.002488475  |
| Ti | 9.700192875  | 16.309304630 | 1.476498866  |
| Ti | 9.698537972  | 16.311490988 | 4.437704330  |
| Ti | 6.447656296  | 16.363191703 | 2.950549597  |
| Ti | -0.053329025 | 16.643837468 | 5.917276645  |
| Ti | 3.185893513  | 16.311298820 | 1.476846183  |
| Ti | 3.185159906  | 16.312769013 | 4.437747154  |
| Ti | -0.051902206 | 16.641753623 | 2.960398449  |
| Ti | 6.437907812  | 16.382614967 | 5.935572423  |
| Ti | 3.181749177  | 16.311811745 | 7.396746042  |
| Ti | 3.179340014  | 16.317159947 | 10.350519560 |
| Ti | -0.054074712 | 16.642157605 | 8.873780671  |
| Ti | 6.440197867  | 16.326843718 | -0.017156469 |
| Ti | 9.697946592  | 16.309570379 | 7.395907087  |
| Ti | 9.701089881  | 16.317419624 | 10.350576342 |
| Ti | 6.442050980  | 16.624952489 | 8.877859162  |
| Ti | -0.052838698 | 16.641955793 | 0.003576798  |
| Ti | 6.422770275  | 19.887531081 | 7.446987300  |
| Ti | 6.422834570  | 20.099749650 | 10.302151638 |

|    |              |              |              |
|----|--------------|--------------|--------------|
| Ti | 3.177998661  | 19.573082665 | 8.868533652  |
| Ti | 3.202007159  | 19.566918641 | -0.000225354 |
| Ti | 6.427055930  | 19.623663947 | 1.255093943  |
| Ti | 6.424277625  | 19.492738548 | 4.523315737  |
| Ti | 3.189925757  | 19.552681773 | 2.955460774  |
| Ti | 3.200307185  | 19.563824664 | 5.909077313  |
| Ti | -0.071094586 | 20.003871709 | 1.479790334  |
| Ti | -0.070476320 | 20.010512937 | 4.440124075  |
| Ti | 9.664152462  | 19.551958464 | 2.955339639  |
| Ti | 9.656598695  | 19.561818686 | 5.906792544  |
| Ti | -0.072144601 | 20.003000880 | 7.395529131  |
| Ti | -0.071327606 | 20.001243149 | 10.353334295 |
| Ti | 9.668672304  | 19.571933228 | 8.866437447  |
| Ti | 9.658322569  | 19.567369058 | -0.002562528 |
| O  | 0.000000000  | 1.266689833  | 2.957400000  |
| O  | 0.000000000  | 1.266689833  | 0.000000000  |
| O  | 0.000000000  | 1.266689833  | 8.872200000  |
| O  | 0.000000000  | 1.266689833  | 5.914800000  |
| O  | 6.494400000  | 1.266689833  | 2.957400000  |
| O  | 6.494400000  | 1.266689833  | 0.000000000  |
| O  | 6.494400000  | 1.266689833  | 8.872200000  |
| O  | 6.494400000  | 1.266689833  | 5.914800000  |

|   |              |             |              |
|---|--------------|-------------|--------------|
| O | 9.741600000  | 1.980499953 | 8.872200000  |
| O | 9.741600000  | 1.980499953 | 5.914800000  |
| O | 9.741600000  | 1.980499953 | 2.957400000  |
| O | 9.741600000  | 1.980499953 | 0.000000000  |
| O | 3.247200000  | 1.980499953 | 8.872200000  |
| O | 3.247200000  | 1.980499953 | 5.914800000  |
| O | 3.247200000  | 1.980499953 | 2.957400000  |
| O | 3.247200000  | 1.980499953 | 0.000000000  |
| O | 1.266699988  | 3.247190143 | 1.478700000  |
| O | 1.266699988  | 3.247190143 | 4.436100000  |
| O | 5.227599998  | 3.247190143 | 1.478700000  |
| O | 5.227599998  | 3.247190143 | 4.436100000  |
| O | 1.266699988  | 3.247190143 | 7.393500000  |
| O | 1.266699988  | 3.247190143 | 10.350900000 |
| O | 5.227599998  | 3.247190143 | 7.393500000  |
| O | 5.227599998  | 3.247190143 | 10.350900000 |
| O | 7.761099988  | 3.247190143 | 1.478700000  |
| O | 7.761099988  | 3.247190143 | 4.436100000  |
| O | 11.721999998 | 3.247190143 | 1.478700000  |
| O | 11.721999998 | 3.247190143 | 4.436100000  |
| O | 7.761099988  | 3.247190143 | 7.393500000  |
| O | 7.761099988  | 3.247190143 | 10.350900000 |

|   |              |             |              |
|---|--------------|-------------|--------------|
| O | 11.721999998 | 3.247190143 | 7.393500000  |
| O | 11.721999998 | 3.247190143 | 10.350900000 |
| O | 9.741600000  | 4.513899978 | 8.872200000  |
| O | 9.741600000  | 4.513899978 | 5.914800000  |
| O | 9.741600000  | 4.513899978 | 2.957400000  |
| O | 9.741600000  | 4.513899978 | 0.000000000  |
| O | 3.247200000  | 4.513899978 | 8.872200000  |
| O | 3.247200000  | 4.513899978 | 5.914800000  |
| O | 3.247200000  | 4.513899978 | 2.957400000  |
| O | 3.247200000  | 4.513899978 | 0.000000000  |
| O | 0.000000000  | 5.227600085 | 2.957400000  |
| O | 0.000000000  | 5.227600085 | 0.000000000  |
| O | 0.000000000  | 5.227600085 | 8.872200000  |
| O | 0.000000000  | 5.227600085 | 5.914800000  |
| O | 6.494400000  | 5.227600085 | 0.000000000  |
| O | 6.494400000  | 5.227600085 | 2.957400000  |
| O | 6.494400000  | 5.227600085 | 8.872200000  |
| O | 6.494400000  | 5.227600085 | 5.914800000  |
| O | 8.474900012  | 6.494389931 | 7.393500000  |
| O | 11.008299988 | 6.494389931 | 7.393500000  |
| O | 8.474900012  | 6.494389931 | 10.350900000 |
| O | 11.008299988 | 6.494389931 | 10.350900000 |

|   |              |             |              |
|---|--------------|-------------|--------------|
| O | 8.474900012  | 6.494389931 | 1.478700000  |
| O | 11.008299988 | 6.494389931 | 1.478700000  |
| O | 8.474900012  | 6.494389931 | 4.436100000  |
| O | 11.008299988 | 6.494389931 | 4.436100000  |
| O | 1.980500012  | 6.494389931 | 1.478700000  |
| O | 4.513899988  | 6.494389931 | 1.478700000  |
| O | 1.980500012  | 6.494389931 | 4.436100000  |
| O | 4.513899988  | 6.494389931 | 4.436100000  |
| O | 1.980500012  | 6.494389931 | 7.393500000  |
| O | 4.513899988  | 6.494389931 | 7.393500000  |
| O | 1.980500012  | 6.494389931 | 10.350900000 |
| O | 4.513899988  | 6.494389931 | 10.350900000 |
| O | 0.000000000  | 7.761090122 | 8.872200000  |
| O | 0.000000000  | 7.761090122 | 5.914800000  |
| O | 6.494400000  | 7.761090122 | 2.957400000  |
| O | 6.494400000  | 7.761090122 | 0.000000000  |
| O | 0.000000000  | 7.761090122 | 2.957400000  |
| O | 0.000000000  | 7.761090122 | 0.000000000  |
| O | 6.494400000  | 7.761090122 | 8.872200000  |
| O | 6.494400000  | 7.761090122 | 5.914800000  |
| O | 3.247200000  | 8.474889884 | 2.957400000  |
| O | 3.247200000  | 8.474889884 | 0.000000000  |

|   |              |             |              |
|---|--------------|-------------|--------------|
| O | 3.247200000  | 8.474889884 | 8.872200000  |
| O | 3.247200000  | 8.474889884 | 5.914800000  |
| O | 9.741600000  | 8.474889884 | 2.957400000  |
| O | 9.741600000  | 8.474889884 | 0.000000000  |
| O | 9.741600000  | 8.474889884 | 8.872200000  |
| O | 9.741600000  | 8.474889884 | 5.914800000  |
| O | 1.271594298  | 9.785076854 | 1.477932141  |
| O | 1.271920187  | 9.785955541 | 4.435156471  |
| O | 5.213133982  | 9.772601646 | 1.481852943  |
| O | 5.213046827  | 9.773263161 | 4.436802205  |
| O | 1.271896417  | 9.785854099 | 7.392616329  |
| O | 1.271892391  | 9.786291300 | 10.349778791 |
| O | 5.213371807  | 9.773681073 | 7.394691122  |
| O | 5.213216591  | 9.775631686 | 10.354007518 |
| O | 7.761002312  | 9.780792364 | 1.483731839  |
| O | 7.761416915  | 9.781697482 | 4.434371932  |
| O | 11.702732152 | 9.775848857 | 1.477846258  |
| O | 11.702624215 | 9.776406073 | 4.435258087  |
| O | 7.761477313  | 9.781457808 | 7.396786026  |
| O | 7.761051280  | 9.783478430 | 10.352123181 |
| O | 11.702495496 | 9.776458223 | 7.392431905  |
| O | 11.702372882 | 9.776818270 | 10.349997638 |

|   |              |              |              |
|---|--------------|--------------|--------------|
| O | 9.726199829  | 11.069558665 | 2.957649368  |
| O | 9.726157096  | 11.068510671 | 0.002309256  |
| O | 3.245503013  | 11.070369843 | 2.956894403  |
| O | 3.243575995  | 11.069490085 | 0.001545656  |
| O | 3.245300388  | 11.070056231 | 8.871988605  |
| O | 3.243894870  | 11.068973588 | 5.914469836  |
| O | 9.726353876  | 11.069676181 | 8.872586591  |
| O | 9.726003569  | 11.068240992 | 5.914895228  |
| O | 6.464973224  | 11.797914624 | 8.872002801  |
| O | -0.028932812 | 11.793329022 | 2.952838033  |
| O | 6.465441730  | 11.798772951 | 0.011138396  |
| O | 6.466425762  | 11.797344549 | 5.912970316  |
| O | -0.028482360 | 11.793187932 | -0.002817456 |
| O | -0.028596272 | 11.793367598 | 5.911014291  |
| O | 6.464090635  | 11.803742889 | 2.959542577  |
| O | -0.028874232 | 11.793000765 | 8.867374115  |
| O | 8.435788917  | 13.096169671 | 1.480536545  |
| O | 8.436223132  | 13.091916613 | 4.436825983  |
| O | 10.968281625 | 13.111880662 | 1.481344270  |
| O | 10.968569847 | 13.110218658 | 4.436938127  |
| O | 1.956657900  | 13.093137487 | 1.480950700  |
| O | 1.957154722  | 13.090954344 | 4.435567313  |



|   |              |              |              |
|---|--------------|--------------|--------------|
| O | 4.489656523  | 13.115689019 | 1.478993019  |
| O | 4.489431167  | 13.110268664 | 4.436452167  |
| O | 1.956720766  | 13.089986359 | 7.394157607  |
| O | 1.956291227  | 13.087657125 | 10.351404414 |
| O | 4.487029538  | 13.112455380 | 7.391798430  |
| O | 4.486667021  | 13.107695470 | 10.355895877 |
| O | 8.439360057  | 13.093044261 | 7.393240932  |
| O | 8.438882069  | 13.088122543 | 10.356541418 |
| O | 10.968662327 | 13.109346758 | 7.394594120  |
| O | 10.969644150 | 13.105857014 | 10.353215289 |
| O | -0.029551858 | 14.404485324 | 2.964912151  |
| O | -0.029231944 | 14.404061340 | 5.922261284  |
| O | -0.029507436 | 14.404557477 | 8.880018301  |
| O | -0.029155050 | 14.404588195 | 0.005619415  |
| O | 6.463747471  | 14.427187233 | 2.959585400  |
| O | 6.463981399  | 14.409179155 | 5.909336736  |
| O | 6.466260674  | 14.389942701 | 8.882674283  |
| O | 6.463862682  | 14.407446070 | 0.002448609  |
| O | 9.698160387  | 15.110090797 | 8.877835385  |
| O | 3.180280274  | 15.110956268 | 8.877233377  |
| O | 9.685116774  | 15.110443700 | 5.913385771  |
| O | 9.680697855  | 15.110544428 | 2.960639063  |

|   |              |              |              |
|---|--------------|--------------|--------------|
| O | 3.198946478  | 15.111269523 | 2.960573645  |
| O | 9.691507134  | 15.110521925 | -0.004950451 |
| O | 3.187278249  | 15.111155579 | -0.004931287 |
| O | 3.192824337  | 15.111463120 | 5.913558957  |
| O | 1.233740129  | 16.481321851 | 10.352626412 |
| O | 5.163018256  | 16.468032607 | 4.438896163  |
| O | 5.157866638  | 16.403520925 | 7.413642733  |
| O | 7.726235971  | 16.450043817 | 1.466262122  |
| O | 7.722281790  | 16.483538214 | 4.440673205  |
| O | 5.159284495  | 16.426930426 | 10.340429148 |
| O | 11.653140784 | 16.454069346 | 1.480263518  |
| O | 11.652184029 | 16.455836006 | 4.438642891  |
| O | 1.233740778  | 16.473065053 | 4.438762961  |
| O | 1.233342022  | 16.471699874 | 1.479954884  |
| O | 5.159897177  | 16.432783695 | 1.468403398  |
| O | 7.727091413  | 16.423318881 | 7.412506500  |
| O | 7.725301946  | 16.445696461 | 10.342068021 |
| O | 1.232724794  | 16.476625521 | 7.395532444  |
| O | 11.652301188 | 16.459976907 | 7.395339385  |
| O | 11.651533160 | 16.464116736 | 10.352662019 |
| O | 3.222130577  | 17.745455991 | 8.866210319  |
| O | 3.217151061  | 17.740343535 | 0.001447706  |

|   |              |              |              |
|---|--------------|--------------|--------------|
| O | 9.689896003  | 17.727363617 | 2.951889063  |
| O | 9.677662242  | 17.733948052 | 5.921289837  |
| O | 3.196973479  | 17.727796173 | 2.952313982  |
| O | 3.209699126  | 17.735739359 | 5.922661597  |
| O | 9.664940492  | 17.743978654 | 8.865445535  |
| O | 9.672765984  | 17.740375682 | 0.001468645  |
| O | 6.425027209  | 18.451338286 | -0.104393263 |
| O | 6.423555188  | 18.415454290 | 6.083445380  |
| O | -0.070865594 | 18.508650808 | 0.004984520  |
| O | 6.427332721  | 18.515294538 | 2.883647412  |
| O | -0.068824534 | 18.512237708 | 5.905290303  |
| O | 6.425097089  | 18.529180646 | 8.870515702  |
| O | -0.068971567 | 18.507869277 | 8.871787147  |
| O | -0.069401496 | 18.511110774 | 2.960773565  |
| O | 1.981004367  | 19.955628948 | 4.434790700  |
| O | 4.453041875  | 19.942910136 | 1.498284376  |
| O | 4.463491754  | 19.883057637 | 4.418198858  |
| O | 1.959211498  | 19.911524587 | 7.383926068  |
| O | 1.960165006  | 19.911281698 | 10.350070863 |
| O | 4.423397017  | 20.025465257 | 7.364071386  |
| O | 4.409998940  | 19.974833611 | 10.335317341 |
| O | 8.403766849  | 19.933624631 | 1.496454692  |

|   |              |              |              |
|---|--------------|--------------|--------------|
| O | 8.391305394  | 19.870258814 | 4.417435257  |
| O | 10.879231452 | 19.944034569 | 1.470903820  |
| O | 10.871966946 | 19.968688162 | 4.432970834  |
| O | 8.428205016  | 20.012003490 | 7.360133312  |
| O | 8.440072493  | 19.956805174 | 10.336068284 |
| O | 10.891627573 | 19.923111823 | 7.383885256  |
| O | 10.890327913 | 19.926346533 | 10.346149824 |
| O | 1.974040811  | 19.929605532 | 1.471526531  |
| O | -0.063550172 | 21.114181730 | 2.956399926  |
| O | -0.065495245 | 21.116888514 | 5.916204528  |
| O | -0.063499775 | 21.111749268 | 8.873815568  |
| O | -0.064507576 | 21.112388637 | 0.001153623  |
| O | 6.431903220  | 21.172372225 | 8.815754945  |
| O | 6.430418990  | 21.058613365 | 0.049537515  |
| H | 0.000000000  | 0.932899949  | 9.814800036  |
| H | 0.816399984  | 0.932899949  | 8.400899982  |
| H | 6.457700016  | 0.932899949  | 6.856699960  |
| H | 0.834099951  | 0.932899949  | -0.439200043 |
| H | 0.000000000  | 0.932899949  | 3.900000036  |
| H | 0.816399984  | 0.932899949  | 2.486099982  |
| H | 6.457700016  | 0.932899949  | 0.941899960  |
| H | 0.834099951  | 0.932899949  | 5.475599957  |

|   |              |              |              |
|---|--------------|--------------|--------------|
| H | 6.494400000  | 0.932899949  | 9.814800036  |
| H | 7.310799984  | 0.932899949  | 8.400899982  |
| H | -0.036699984 | 0.932899949  | 6.856699960  |
| H | 7.328499951  | 0.932899949  | -0.439200043 |
| H | 6.494400000  | 0.932899949  | 3.900000036  |
| H | 7.310799984  | 0.932899949  | 2.486099982  |
| H | -0.036699984 | 0.932899949  | 0.941899960  |
| H | 7.328499951  | 0.932899949  | 5.475599957  |
| H | 6.428231156  | 20.920186624 | 5.684504541  |
| H | 6.432993500  | 21.238296235 | 4.569871838  |

TS10-1:

|    |             |             |              |
|----|-------------|-------------|--------------|
| Ti | 3.247200000 | 3.247190143 | 1.478700000  |
| Ti | 3.247200000 | 3.247190143 | 4.436100000  |
| Ti | 0.000000000 | 3.247190143 | 2.957400000  |
| Ti | 0.000000000 | 3.247190143 | 0.000000000  |
| Ti | 3.247200000 | 3.247190143 | 7.393500000  |
| Ti | 3.247200000 | 3.247190143 | 10.350900000 |
| Ti | 0.000000000 | 3.247190143 | 8.872200000  |
| Ti | 0.000000000 | 3.247190143 | 5.914800000  |
| Ti | 9.741600000 | 3.247190143 | 1.478700000  |
| Ti | 9.741600000 | 3.247190143 | 4.436100000  |
| Ti | 6.494400000 | 3.247190143 | 2.957400000  |

|    |             |             |              |
|----|-------------|-------------|--------------|
| Ti | 6.494400000 | 3.247190143 | 0.000000000  |
| Ti | 9.741600000 | 3.247190143 | 7.393500000  |
| Ti | 9.741600000 | 3.247190143 | 10.350900000 |
| Ti | 6.494400000 | 3.247190143 | 8.872200000  |
| Ti | 6.494400000 | 3.247190143 | 5.914800000  |
| Ti | 0.000000000 | 6.494389931 | 4.436100000  |
| Ti | 0.000000000 | 6.494389931 | 1.478700000  |
| Ti | 3.247200000 | 6.494389931 | 2.957400000  |
| Ti | 3.247200000 | 6.494389931 | 0.000000000  |
| Ti | 0.000000000 | 6.494389931 | 10.350900000 |
| Ti | 0.000000000 | 6.494389931 | 7.393500000  |
| Ti | 3.247200000 | 6.494389931 | 8.872200000  |
| Ti | 3.247200000 | 6.494389931 | 5.914800000  |
| Ti | 6.494400000 | 6.494389931 | 4.436100000  |
| Ti | 6.494400000 | 6.494389931 | 1.478700000  |
| Ti | 9.741600000 | 6.494389931 | 2.957400000  |
| Ti | 9.741600000 | 6.494389931 | 0.000000000  |
| Ti | 6.494400000 | 6.494389931 | 10.350900000 |
| Ti | 6.494400000 | 6.494389931 | 7.393500000  |
| Ti | 9.741600000 | 6.494389931 | 8.872200000  |
| Ti | 9.741600000 | 6.494389931 | 5.914800000  |
| Ti | 3.232452257 | 9.737906734 | 1.478641207  |

|    |              |              |              |
|----|--------------|--------------|--------------|
| Ti | 3.229409371  | 9.738298572  | 4.436828703  |
| Ti | -0.006094735 | 9.838767473  | 2.957811552  |
| Ti | -0.012290522 | 9.840423405  | 0.000918095  |
| Ti | 3.226697309  | 9.739137968  | 7.393844123  |
| Ti | 3.227168932  | 9.738686837  | 10.350673581 |
| Ti | -0.014966215 | 9.841326380  | 8.874194589  |
| Ti | -0.014087393 | 9.837340857  | 5.917864340  |
| Ti | 9.741195529  | 9.737776003  | 1.481625933  |
| Ti | 9.740852105  | 9.739341566  | 4.439204915  |
| Ti | 6.487943138  | 9.751107396  | 2.968161505  |
| Ti | 6.482707093  | 9.746035301  | 0.013115951  |
| Ti | 9.732320801  | 9.738819711  | 7.395699596  |
| Ti | 9.734741264  | 9.739142254  | 10.352945693 |
| Ti | 6.479208300  | 9.740399205  | 8.883124044  |
| Ti | 6.479727202  | 9.742778445  | 5.923184229  |
| Ti | -0.030813200 | 13.186181843 | 1.514612655  |
| Ti | -0.028622769 | 13.177548924 | 4.473297586  |
| Ti | 3.211630041  | 12.996016168 | 2.958245107  |
| Ti | 3.213939450  | 12.996681970 | 5.917713394  |
| Ti | 6.463608751  | 13.076891426 | 1.505247515  |
| Ti | 6.465255341  | 13.064809841 | 4.423405538  |
| Ti | 9.716432252  | 12.996761623 | 2.966772237  |

|    |              |              |              |
|----|--------------|--------------|--------------|
| Ti | 9.717109488  | 12.998063222 | 5.925206499  |
| Ti | -0.026622104 | 13.184697362 | 7.430827120  |
| Ti | -0.030127132 | 13.184992758 | 10.387762217 |
| Ti | 3.217120667  | 12.998818679 | 8.877765945  |
| Ti | 3.211777854  | 12.996897712 | 0.001258315  |
| Ti | 6.465220141  | 13.011725730 | 7.379838468  |
| Ti | 6.467285101  | 13.020337932 | 10.376197718 |
| Ti | 9.716627473  | 12.998750098 | 8.882046841  |
| Ti | 9.715028812  | 12.997827834 | 0.008386477  |
| Ti | 9.709219831  | 16.322436354 | 1.483215713  |
| Ti | 9.711807460  | 16.311975338 | 4.442478994  |
| Ti | 6.453906767  | 16.363601042 | 2.971323557  |
| Ti | -0.043838499 | 16.643274894 | 5.922658048  |
| Ti | 3.196375735  | 16.321794126 | 1.482599273  |
| Ti | 3.191338808  | 16.316626662 | 4.443437664  |
| Ti | -0.043168147 | 16.644516129 | 2.960779362  |
| Ti | 6.450042209  | 16.283961304 | 5.912923825  |
| Ti | 3.197180911  | 16.325682494 | 7.400446696  |
| Ti | 3.201457863  | 16.348180447 | 10.356568271 |
| Ti | -0.042289974 | 16.654893205 | 8.878426983  |
| Ti | 6.453898064  | 16.321607316 | 0.031566460  |
| Ti | 9.706177984  | 16.325159925 | 7.401743575  |



|    |              |              |              |
|----|--------------|--------------|--------------|
| Ti | 9.702735432  | 16.351860216 | 10.357420002 |
| Ti | 6.452908188  | 16.256886321 | 8.864312969  |
| Ti | -0.044821881 | 16.652917946 | 0.001986426  |
| Ti | 6.432304444  | 19.636668511 | 7.181725318  |
| Ti | 6.443169315  | 19.296642809 | 10.406067340 |
| Ti | 3.266265870  | 19.618002847 | 8.891680985  |
| Ti | 3.259472078  | 19.603321634 | 0.030481212  |
| Ti | 6.451351220  | 19.871834735 | 1.841591079  |
| Ti | 6.463864111  | 19.691220314 | 4.390339795  |
| Ti | 3.246981528  | 19.580558289 | 2.965935530  |
| Ti | 3.202724400  | 19.575878389 | 5.921950165  |
| Ti | -0.041724182 | 20.005277607 | 1.481988984  |
| Ti | -0.039103692 | 20.004568943 | 4.439777704  |
| Ti | 9.669209261  | 19.577945089 | 2.955802649  |
| Ti | 9.707843278  | 19.570067983 | 5.921224656  |
| Ti | -0.047214808 | 20.009685329 | 7.411482885  |
| Ti | -0.050464735 | 20.016810550 | 10.359645742 |
| Ti | 9.608004217  | 19.628651387 | 8.886582191  |
| Ti | 9.634801021  | 19.606635283 | 0.020831098  |
| O  | 0.000000000  | 1.266689833  | 2.957400000  |
| O  | 0.000000000  | 1.266689833  | 0.000000000  |
| O  | 0.000000000  | 1.266689833  | 8.872200000  |

|   |             |             |              |
|---|-------------|-------------|--------------|
| O | 0.000000000 | 1.266689833 | 5.914800000  |
| O | 6.494400000 | 1.266689833 | 2.957400000  |
| O | 6.494400000 | 1.266689833 | 0.000000000  |
| O | 6.494400000 | 1.266689833 | 8.872200000  |
| O | 6.494400000 | 1.266689833 | 5.914800000  |
| O | 9.741600000 | 1.980499953 | 8.872200000  |
| O | 9.741600000 | 1.980499953 | 5.914800000  |
| O | 9.741600000 | 1.980499953 | 2.957400000  |
| O | 9.741600000 | 1.980499953 | 0.000000000  |
| O | 3.247200000 | 1.980499953 | 8.872200000  |
| O | 3.247200000 | 1.980499953 | 5.914800000  |
| O | 3.247200000 | 1.980499953 | 2.957400000  |
| O | 3.247200000 | 1.980499953 | 0.000000000  |
| O | 1.266699988 | 3.247190143 | 1.478700000  |
| O | 1.266699988 | 3.247190143 | 4.436100000  |
| O | 5.227599998 | 3.247190143 | 1.478700000  |
| O | 5.227599998 | 3.247190143 | 4.436100000  |
| O | 1.266699988 | 3.247190143 | 7.393500000  |
| O | 1.266699988 | 3.247190143 | 10.350900000 |
| O | 5.227599998 | 3.247190143 | 7.393500000  |
| O | 5.227599998 | 3.247190143 | 10.350900000 |
| O | 7.761099988 | 3.247190143 | 1.478700000  |

|   |              |             |              |
|---|--------------|-------------|--------------|
| O | 7.761099988  | 3.247190143 | 4.436100000  |
| O | 11.721999998 | 3.247190143 | 1.478700000  |
| O | 11.721999998 | 3.247190143 | 4.436100000  |
| O | 7.761099988  | 3.247190143 | 7.393500000  |
| O | 7.761099988  | 3.247190143 | 10.350900000 |
| O | 11.721999998 | 3.247190143 | 7.393500000  |
| O | 11.721999998 | 3.247190143 | 10.350900000 |
| O | 9.741600000  | 4.513899978 | 8.872200000  |
| O | 9.741600000  | 4.513899978 | 5.914800000  |
| O | 9.741600000  | 4.513899978 | 2.957400000  |
| O | 9.741600000  | 4.513899978 | 0.000000000  |
| O | 3.247200000  | 4.513899978 | 8.872200000  |
| O | 3.247200000  | 4.513899978 | 5.914800000  |
| O | 3.247200000  | 4.513899978 | 2.957400000  |
| O | 3.247200000  | 4.513899978 | 0.000000000  |
| O | 0.000000000  | 5.227600085 | 2.957400000  |
| O | 0.000000000  | 5.227600085 | 0.000000000  |
| O | 0.000000000  | 5.227600085 | 8.872200000  |
| O | 0.000000000  | 5.227600085 | 5.914800000  |
| O | 6.494400000  | 5.227600085 | 0.000000000  |
| O | 6.494400000  | 5.227600085 | 2.957400000  |
| O | 6.494400000  | 5.227600085 | 8.872200000  |

|   |              |             |              |
|---|--------------|-------------|--------------|
| O | 6.494400000  | 5.227600085 | 5.914800000  |
| O | 8.474900012  | 6.494389931 | 7.393500000  |
| O | 11.008299988 | 6.494389931 | 7.393500000  |
| O | 8.474900012  | 6.494389931 | 10.350900000 |
| O | 11.008299988 | 6.494389931 | 10.350900000 |
| O | 8.474900012  | 6.494389931 | 1.478700000  |
| O | 11.008299988 | 6.494389931 | 1.478700000  |
| O | 8.474900012  | 6.494389931 | 4.436100000  |
| O | 11.008299988 | 6.494389931 | 4.436100000  |
| O | 1.980500012  | 6.494389931 | 1.478700000  |
| O | 4.513899988  | 6.494389931 | 1.478700000  |
| O | 1.980500012  | 6.494389931 | 4.436100000  |
| O | 4.513899988  | 6.494389931 | 4.436100000  |
| O | 1.980500012  | 6.494389931 | 7.393500000  |
| O | 4.513899988  | 6.494389931 | 7.393500000  |
| O | 1.980500012  | 6.494389931 | 10.350900000 |
| O | 4.513899988  | 6.494389931 | 10.350900000 |
| O | 0.000000000  | 7.761090122 | 8.872200000  |
| O | 0.000000000  | 7.761090122 | 5.914800000  |
| O | 6.494400000  | 7.761090122 | 2.957400000  |
| O | 6.494400000  | 7.761090122 | 0.000000000  |
| O | 0.000000000  | 7.761090122 | 2.957400000  |

|   |              |             |              |
|---|--------------|-------------|--------------|
| O | 0.000000000  | 7.761090122 | 0.000000000  |
| O | 6.494400000  | 7.761090122 | 8.872200000  |
| O | 6.494400000  | 7.761090122 | 5.914800000  |
| O | 3.247200000  | 8.474889884 | 2.957400000  |
| O | 3.247200000  | 8.474889884 | 0.000000000  |
| O | 3.247200000  | 8.474889884 | 8.872200000  |
| O | 3.247200000  | 8.474889884 | 5.914800000  |
| O | 9.741600000  | 8.474889884 | 2.957400000  |
| O | 9.741600000  | 8.474889884 | 0.000000000  |
| O | 9.741600000  | 8.474889884 | 8.872200000  |
| O | 9.741600000  | 8.474889884 | 5.914800000  |
| O | 1.270460895  | 9.788519806 | 1.478378945  |
| O | 1.270197742  | 9.789345272 | 4.437256817  |
| O | 5.211112275  | 9.766866607 | 1.481903337  |
| O | 5.210768591  | 9.768363946 | 4.438727118  |
| O | 1.268382298  | 9.787908655 | 7.393724644  |
| O | 1.268843010  | 9.788042244 | 10.351068454 |
| O | 5.209414769  | 9.766786597 | 7.399413380  |
| O | 5.209687144  | 9.769755558 | 10.356038897 |
| O | 7.761763586  | 9.773295665 | 1.480478817  |
| O | 7.761313134  | 9.774712637 | 4.440740989  |
| O | 11.702907631 | 9.782857277 | 1.479955712  |

|   |              |              |              |
|---|--------------|--------------|--------------|
| O | 11.702446269 | 9.783874554  | 4.435288016  |
| O | 7.759571466  | 9.773464973  | 7.399469808  |
| O | 7.760166743  | 9.776585740  | 10.354809919 |
| O | 11.700975937 | 9.782879780  | 7.393539747  |
| O | 11.701019839 | 9.783089451  | 10.351680044 |
| O | 9.723323200  | 11.074069257 | 2.957970305  |
| O | 9.724931083  | 11.075357641 | 0.002553419  |
| O | 3.243118529  | 11.074103190 | 2.956909545  |
| O | 3.241684696  | 11.074851146 | 0.001669866  |
| O | 3.241988114  | 11.074746846 | 8.873562770  |
| O | 3.243132817  | 11.073427387 | 5.917298412  |
| O | 9.724375422  | 11.075409076 | 8.874360558  |
| O | 9.724249171  | 11.073766718 | 5.918553650  |
| O | 6.467072344  | 11.778252400 | 8.880961357  |
| O | -0.023828343 | 11.804489415 | 2.954665825  |
| O | 6.467684896  | 11.782771565 | 0.010583588  |
| O | 6.467679441  | 11.766469068 | 5.922540817  |
| O | -0.024783799 | 11.803942558 | -0.001474086 |
| O | -0.024687812 | 11.803790395 | 5.913498153  |
| O | 6.468565666  | 11.774266520 | 2.952231766  |
| O | -0.025006427 | 11.803337121 | 8.870066650  |
| O | 8.439483321  | 13.104765085 | 1.480642657  |

|   |              |              |              |
|---|--------------|--------------|--------------|
| O | 8.440745832  | 13.095371709 | 4.443220355  |
| O | 10.972269966 | 13.117299230 | 1.481021086  |
| O | 10.973232436 | 13.111307729 | 4.441244811  |
| O | 1.959375157  | 13.105325158 | 1.479054651  |
| O | 1.959837948  | 13.099665130 | 4.439297541  |
| O | 4.492892553  | 13.118465812 | 1.478823264  |
| O | 4.491978531  | 13.107801555 | 4.440195408  |
| O | 1.961380368  | 13.104501836 | 7.400391688  |
| O | 1.959931857  | 13.103843893 | 10.353244627 |
| O | 4.495920631  | 13.111320588 | 7.400077849  |
| O | 4.494995829  | 13.105489109 | 10.355485153 |
| O | 8.437564096  | 13.098928247 | 7.402408044  |
| O | 8.438144695  | 13.092379531 | 10.355849268 |
| O | 10.972676646 | 13.117340664 | 7.402291877  |
| O | 10.972487659 | 13.116656646 | 10.355753803 |
| O | -0.028034506 | 14.420244179 | 2.967432802  |
| O | -0.027191403 | 14.419269408 | 5.923706269  |
| O | -0.027336488 | 14.419165823 | 8.883095535  |
| O | -0.028321949 | 14.421472197 | 0.008287226  |
| O | 6.467382387  | 14.371001287 | 2.966571962  |
| O | 6.466457324  | 14.357395215 | 5.926617416  |
| O | 6.466398355  | 14.382370993 | 8.892034690  |

|   |              |              |              |
|---|--------------|--------------|--------------|
| O | 6.467760101  | 14.397315812 | -0.015060737 |
| O | 9.698220136  | 15.136934320 | 8.896052377  |
| O | 3.207098769  | 15.134182173 | 8.894048680  |
| O | 9.720649975  | 15.116222316 | 5.927917843  |
| O | 9.720590096  | 15.116772031 | 2.960226091  |
| O | 3.181089346  | 15.120167834 | 2.961368949  |
| O | 9.698670068  | 15.135640936 | -0.012559250 |
| O | 3.203387089  | 15.134555794 | -0.010008196 |
| O | 3.183460971  | 15.117748588 | 5.926577668  |
| O | 1.248309796  | 16.501109806 | 10.356855849 |
| O | 5.164913841  | 16.372559004 | 4.448565914  |
| O | 5.169506681  | 16.386455114 | 7.403009224  |
| O | 7.740471436  | 16.385963978 | 1.482435078  |
| O | 7.742225443  | 16.379752091 | 4.449701201  |
| O | 5.185512130  | 16.508556140 | 10.353162884 |
| O | 11.660243450 | 16.486593615 | 1.479543687  |
| O | 11.661286320 | 16.487544811 | 4.443700281  |
| O | 1.244324572  | 16.498381233 | 4.443045395  |
| O | 1.245211707  | 16.498408380 | 1.479550667  |
| O | 5.167325342  | 16.376583818 | 1.482498366  |
| O | 7.736016018  | 16.390274544 | 7.402298265  |
| O | 7.720296322  | 16.516461106 | 10.352954802 |



|   |              |              |              |
|---|--------------|--------------|--------------|
| O | 1.245613451  | 16.491833231 | 7.407566222  |
| O | 11.660086934 | 16.484368680 | 7.408484909  |
| O | 11.656081189 | 16.495664805 | 10.354938862 |
| O | 3.259664312  | 17.790561197 | 8.874600108  |
| O | 3.256901984  | 17.776991202 | 0.015985457  |
| O | 9.654090818  | 17.752305462 | 2.959757521  |
| O | 9.665575385  | 17.747019768 | 5.933664781  |
| O | 3.259810176  | 17.754498607 | 2.961077704  |
| O | 3.238851709  | 17.749640469 | 5.934451450  |
| O | 9.638200709  | 17.801487631 | 8.867847417  |
| O | 9.651290172  | 17.780090180 | 0.015409237  |
| O | 6.447020624  | 18.472741452 | 0.168169712  |
| O | 6.451930651  | 18.340459089 | 5.902644140  |
| O | -0.050258993 | 18.533909838 | -0.009033083 |
| O | 6.454361115  | 18.345348660 | 2.964324575  |
| O | -0.049314057 | 18.521827895 | 5.939484945  |
| O | 6.456723648  | 18.486307519 | 8.725628417  |
| O | -0.047803850 | 18.536149418 | 8.891682641  |
| O | -0.049616047 | 18.522448691 | 2.962526830  |
| O | 1.999586144  | 19.942193970 | 4.444214632  |
| O | 4.524944495  | 20.073287248 | 1.477939948  |
| O | 4.482778044  | 19.927453107 | 4.499566987  |

|   |              |              |              |
|---|--------------|--------------|--------------|
| O | 2.026707928  | 19.967025087 | 7.440574119  |
| O | 2.067508476  | 20.007426104 | 10.361037139 |
| O | 4.554218003  | 20.071057670 | 7.397702465  |
| O | 4.666946369  | 20.040012167 | 10.366902018 |
| O | 8.375121479  | 20.075979030 | 1.478798186  |
| O | 8.437591372  | 19.945830162 | 4.487058841  |
| O | 10.889215163 | 19.946996386 | 1.470940137  |
| O | 10.905692884 | 19.941757127 | 4.443935809  |
| O | 8.322832597  | 20.127781544 | 7.370178417  |
| O | 8.220933512  | 20.047634596 | 10.368675394 |
| O | 10.861250926 | 19.977796143 | 7.439982520  |
| O | 10.821547022 | 20.013439036 | 10.348045872 |
| O | 2.009406326  | 19.936788261 | 1.481016117  |
| O | 6.426242181  | 21.246400513 | 3.179384337  |
| O | 6.454593874  | 21.502090502 | 5.621628561  |
| O | -0.044797332 | 21.117179623 | 2.963687669  |
| O | -0.045969571 | 21.112565089 | 5.929192483  |
| O | -0.045064901 | 21.128955455 | 8.885880578  |
| O | -0.044459104 | 21.125110664 | 0.004798204  |
| H | 0.000000000  | 0.932899949  | 9.814800036  |
| H | 0.816399984  | 0.932899949  | 8.400899982  |
| H | 6.457700016  | 0.932899949  | 6.856699960  |

|   |              |              |              |
|---|--------------|--------------|--------------|
| H | 0.834099951  | 0.932899949  | -0.439200043 |
| H | 0.000000000  | 0.932899949  | 3.900000036  |
| H | 0.816399984  | 0.932899949  | 2.486099982  |
| H | 6.457700016  | 0.932899949  | 0.941899960  |
| H | 0.834099951  | 0.932899949  | 5.475599957  |
| H | 6.494400000  | 0.932899949  | 9.814800036  |
| H | 7.310799984  | 0.932899949  | 8.400899982  |
| H | -0.036699984 | 0.932899949  | 6.856699960  |
| H | 7.328499951  | 0.932899949  | -0.439200043 |
| H | 6.494400000  | 0.932899949  | 3.900000036  |
| H | 7.310799984  | 0.932899949  | 2.486099982  |
| H | -0.036699984 | 0.932899949  | 0.941899960  |
| H | 7.328499951  | 0.932899949  | 5.475599957  |
| H | 7.352676654  | 21.812700200 | 5.850711131  |
| H | 6.387741560  | 21.682101987 | 4.428698929  |

TS10-2:

|    |             |             |              |
|----|-------------|-------------|--------------|
| Ti | 3.247200000 | 3.247190143 | 1.478700000  |
| Ti | 3.247200000 | 3.247190143 | 4.436100000  |
| Ti | 0.000000000 | 3.247190143 | 2.957400000  |
| Ti | 0.000000000 | 3.247190143 | 0.000000000  |
| Ti | 3.247200000 | 3.247190143 | 7.393500000  |
| Ti | 3.247200000 | 3.247190143 | 10.350900000 |

|    |             |             |              |
|----|-------------|-------------|--------------|
| Ti | 0.000000000 | 3.247190143 | 8.872200000  |
| Ti | 0.000000000 | 3.247190143 | 5.914800000  |
| Ti | 9.741600000 | 3.247190143 | 1.478700000  |
| Ti | 9.741600000 | 3.247190143 | 4.436100000  |
| Ti | 6.494400000 | 3.247190143 | 2.957400000  |
| Ti | 6.494400000 | 3.247190143 | 0.000000000  |
| Ti | 9.741600000 | 3.247190143 | 7.393500000  |
| Ti | 9.741600000 | 3.247190143 | 10.350900000 |
| Ti | 6.494400000 | 3.247190143 | 8.872200000  |
| Ti | 6.494400000 | 3.247190143 | 5.914800000  |
| Ti | 0.000000000 | 6.494389931 | 4.436100000  |
| Ti | 0.000000000 | 6.494389931 | 1.478700000  |
| Ti | 3.247200000 | 6.494389931 | 2.957400000  |
| Ti | 3.247200000 | 6.494389931 | 0.000000000  |
| Ti | 0.000000000 | 6.494389931 | 10.350900000 |
| Ti | 0.000000000 | 6.494389931 | 7.393500000  |
| Ti | 3.247200000 | 6.494389931 | 8.872200000  |
| Ti | 3.247200000 | 6.494389931 | 5.914800000  |
| Ti | 6.494400000 | 6.494389931 | 4.436100000  |
| Ti | 6.494400000 | 6.494389931 | 1.478700000  |
| Ti | 9.741600000 | 6.494389931 | 2.957400000  |
| Ti | 9.741600000 | 6.494389931 | 0.000000000  |

|    |              |              |              |
|----|--------------|--------------|--------------|
| Ti | 6.494400000  | 6.494389931  | 10.350900000 |
| Ti | 6.494400000  | 6.494389931  | 7.393500000  |
| Ti | 9.741600000  | 6.494389931  | 8.872200000  |
| Ti | 9.741600000  | 6.494389931  | 5.914800000  |
| Ti | 3.233048053  | 9.739276200  | 1.479273617  |
| Ti | 3.230357163  | 9.740697458  | 4.436274723  |
| Ti | -0.006555188 | 9.839176098  | 2.957417863  |
| Ti | -0.008912915 | 9.842841936  | -0.000134976 |
| Ti | 3.230782676  | 9.738646832  | 7.393219875  |
| Ti | 3.232641114  | 9.738695409  | 10.351478349 |
| Ti | -0.010292585 | 9.839619371  | 8.872512065  |
| Ti | -0.012295588 | 9.840848461  | 5.916313834  |
| Ti | 9.741896404  | 9.737670275  | 1.481551407  |
| Ti | 9.740904320  | 9.739526947  | 4.440083026  |
| Ti | 6.488996919  | 9.746970781  | 2.971148125  |
| Ti | 6.484837256  | 9.737400597  | 0.016321063  |
| Ti | 9.735264193  | 9.739538377  | 7.396594978  |
| Ti | 9.738935737  | 9.740873552  | 10.353231496 |
| Ti | 6.485179641  | 9.735681800  | 8.885048129  |
| Ti | 6.480463407  | 9.741914046  | 5.924304137  |
| Ti | -0.025689638 | 13.186825856 | 1.513829535  |
| Ti | -0.025784457 | 13.186513672 | 4.471126972  |

|    |              |              |              |
|----|--------------|--------------|--------------|
| Ti | 3.217139760  | 13.001034684 | 2.963041063  |
| Ti | 3.217546440  | 13.000501042 | 5.920769571  |
| Ti | 6.468294720  | 13.051978156 | 1.516470138  |
| Ti | 6.469005467  | 13.074105346 | 4.431236023  |
| Ti | 9.720478912  | 12.996791270 | 2.967029058  |
| Ti | 9.719348237  | 12.998900118 | 5.925364424  |
| Ti | -0.024560392 | 13.185527471 | 7.430204528  |
| Ti | -0.026042804 | 13.187607387 | 10.385824291 |
| Ti | 3.220823904  | 12.997209539 | 8.880610018  |
| Ti | 3.218979364  | 13.000202075 | 0.007033880  |
| Ti | 6.468230036  | 13.012161859 | 7.373246897  |
| Ti | 6.469628800  | 12.999019777 | 10.373745205 |
| Ti | 9.718295495  | 12.999382681 | 8.882570537  |
| Ti | 9.717972593  | 12.998411840 | 0.009951060  |
| Ti | 9.713782536  | 16.325501756 | 1.478849171  |
| Ti | 9.720890917  | 16.319415957 | 4.442341179  |
| Ti | 6.454124719  | 16.342943688 | 2.960973604  |
| Ti | -0.030204415 | 16.651375958 | 5.922676621  |
| Ti | 3.205440359  | 16.344567473 | 1.489314937  |
| Ti | 3.201165095  | 16.334130746 | 4.440289453  |
| Ti | -0.038718833 | 16.653886287 | 2.960043442  |
| Ti | 6.461882409  | 16.298582151 | 5.903274302  |

|    |              |              |              |
|----|--------------|--------------|--------------|
| Ti | 3.206152015  | 16.321152614 | 7.400502413  |
| Ti | 3.206391528  | 16.332850935 | 10.361963279 |
| Ti | -0.037290065 | 16.662954620 | 8.877891102  |
| Ti | 6.461482484  | 16.277535460 | 0.014192089  |
| Ti | 9.714799560  | 16.332359085 | 7.401142513  |
| Ti | 9.711075281  | 16.342170730 | 10.353150581 |
| Ti | 6.461292978  | 16.237590574 | 8.856188045  |
| Ti | -0.033364850 | 16.657177076 | 0.001615687  |
| Ti | 6.464687990  | 19.592528431 | 7.206491177  |
| Ti | 6.470359939  | 19.320425573 | 10.380752469 |
| Ti | 3.282120389  | 19.596396082 | 8.906278002  |
| Ti | 3.266956354  | 19.598069873 | 0.025863291  |
| Ti | 6.492572736  | 19.758668810 | 1.710654679  |
| Ti | 6.599425488  | 19.791532409 | 4.304734658  |
| Ti | 3.284409795  | 19.634526801 | 2.957369006  |
| Ti | 3.183761921  | 19.578730549 | 5.960200704  |
| Ti | -0.023334639 | 20.012177084 | 1.483730774  |
| Ti | -0.016230934 | 20.009521379 | 4.438214541  |
| Ti | 9.703525281  | 19.588990467 | 2.939031825  |
| Ti | 9.741104867  | 19.583340440 | 5.925675188  |
| Ti | -0.038626613 | 20.024609788 | 7.409866843  |
| Ti | -0.023109543 | 20.028985719 | 10.357447684 |

|    |             |              |             |
|----|-------------|--------------|-------------|
| Ti | 9.633339911 | 19.624120792 | 8.883470888 |
| Ti | 9.678518984 | 19.595385235 | 0.003391191 |
| O  | 0.000000000 | 1.266689833  | 2.957400000 |
| O  | 0.000000000 | 1.266689833  | 0.000000000 |
| O  | 0.000000000 | 1.266689833  | 8.872200000 |
| O  | 0.000000000 | 1.266689833  | 5.914800000 |
| O  | 6.494400000 | 1.266689833  | 2.957400000 |
| O  | 6.494400000 | 1.266689833  | 0.000000000 |
| O  | 6.494400000 | 1.266689833  | 8.872200000 |
| O  | 6.494400000 | 1.266689833  | 5.914800000 |
| O  | 9.741600000 | 1.980499953  | 8.872200000 |
| O  | 9.741600000 | 1.980499953  | 5.914800000 |
| O  | 9.741600000 | 1.980499953  | 2.957400000 |
| O  | 9.741600000 | 1.980499953  | 0.000000000 |
| O  | 3.247200000 | 1.980499953  | 8.872200000 |
| O  | 3.247200000 | 1.980499953  | 5.914800000 |
| O  | 3.247200000 | 1.980499953  | 2.957400000 |
| O  | 3.247200000 | 1.980499953  | 0.000000000 |
| O  | 1.266699988 | 3.247190143  | 1.478700000 |
| O  | 1.266699988 | 3.247190143  | 4.436100000 |
| O  | 5.227599998 | 3.247190143  | 1.478700000 |
| O  | 5.227599998 | 3.247190143  | 4.436100000 |



|   |              |             |              |
|---|--------------|-------------|--------------|
| O | 1.266699988  | 3.247190143 | 7.393500000  |
| O | 1.266699988  | 3.247190143 | 10.350900000 |
| O | 5.227599998  | 3.247190143 | 7.393500000  |
| O | 5.227599998  | 3.247190143 | 10.350900000 |
| O | 7.761099988  | 3.247190143 | 1.478700000  |
| O | 7.761099988  | 3.247190143 | 4.436100000  |
| O | 11.721999998 | 3.247190143 | 1.478700000  |
| O | 11.721999998 | 3.247190143 | 4.436100000  |
| O | 7.761099988  | 3.247190143 | 7.393500000  |
| O | 7.761099988  | 3.247190143 | 10.350900000 |
| O | 11.721999998 | 3.247190143 | 7.393500000  |
| O | 11.721999998 | 3.247190143 | 10.350900000 |
| O | 9.741600000  | 4.513899978 | 8.872200000  |
| O | 9.741600000  | 4.513899978 | 5.914800000  |
| O | 9.741600000  | 4.513899978 | 2.957400000  |
| O | 9.741600000  | 4.513899978 | 0.000000000  |
| O | 3.247200000  | 4.513899978 | 8.872200000  |
| O | 3.247200000  | 4.513899978 | 5.914800000  |
| O | 3.247200000  | 4.513899978 | 2.957400000  |
| O | 3.247200000  | 4.513899978 | 0.000000000  |
| O | 0.000000000  | 5.227600085 | 2.957400000  |
| O | 0.000000000  | 5.227600085 | 0.000000000  |

|   |              |             |              |
|---|--------------|-------------|--------------|
| O | 0.000000000  | 5.227600085 | 8.872200000  |
| O | 0.000000000  | 5.227600085 | 5.914800000  |
| O | 6.494400000  | 5.227600085 | 0.000000000  |
| O | 6.494400000  | 5.227600085 | 2.957400000  |
| O | 6.494400000  | 5.227600085 | 8.872200000  |
| O | 6.494400000  | 5.227600085 | 5.914800000  |
| O | 8.474900012  | 6.494389931 | 7.393500000  |
| O | 11.008299988 | 6.494389931 | 7.393500000  |
| O | 8.474900012  | 6.494389931 | 10.350900000 |
| O | 11.008299988 | 6.494389931 | 10.350900000 |
| O | 8.474900012  | 6.494389931 | 1.478700000  |
| O | 11.008299988 | 6.494389931 | 1.478700000  |
| O | 8.474900012  | 6.494389931 | 4.436100000  |
| O | 11.008299988 | 6.494389931 | 4.436100000  |
| O | 1.980500012  | 6.494389931 | 1.478700000  |
| O | 4.513899988  | 6.494389931 | 1.478700000  |
| O | 1.980500012  | 6.494389931 | 4.436100000  |
| O | 4.513899988  | 6.494389931 | 4.436100000  |
| O | 1.980500012  | 6.494389931 | 7.393500000  |
| O | 4.513899988  | 6.494389931 | 7.393500000  |
| O | 1.980500012  | 6.494389931 | 10.350900000 |
| O | 4.513899988  | 6.494389931 | 10.350900000 |

|   |             |             |              |
|---|-------------|-------------|--------------|
| O | 0.000000000 | 7.761090122 | 8.872200000  |
| O | 0.000000000 | 7.761090122 | 5.914800000  |
| O | 6.494400000 | 7.761090122 | 2.957400000  |
| O | 6.494400000 | 7.761090122 | 0.000000000  |
| O | 0.000000000 | 7.761090122 | 2.957400000  |
| O | 0.000000000 | 7.761090122 | 0.000000000  |
| O | 6.494400000 | 7.761090122 | 8.872200000  |
| O | 6.494400000 | 7.761090122 | 5.914800000  |
| O | 3.247200000 | 8.474889884 | 2.957400000  |
| O | 3.247200000 | 8.474889884 | 0.000000000  |
| O | 3.247200000 | 8.474889884 | 8.872200000  |
| O | 3.247200000 | 8.474889884 | 5.914800000  |
| O | 9.741600000 | 8.474889884 | 2.957400000  |
| O | 9.741600000 | 8.474889884 | 0.000000000  |
| O | 9.741600000 | 8.474889884 | 8.872200000  |
| O | 9.741600000 | 8.474889884 | 5.914800000  |
| O | 1.271665866 | 9.790621154 | 1.478631743  |
| O | 1.271054743 | 9.790796891 | 4.436367467  |
| O | 5.212239313 | 9.767327739 | 1.483137993  |
| O | 5.211405432 | 9.766140440 | 4.439093244  |
| O | 1.270446478 | 9.789871412 | 7.393034978  |
| O | 1.270955898 | 9.789664242 | 10.350763605 |

|   |              |              |              |
|---|--------------|--------------|--------------|
| O | 5.211078634  | 9.767760296  | 7.400278597  |
| O | 5.211733140  | 9.768652556  | 10.355782549 |
| O | 7.763208330  | 9.772758095  | 1.481278853  |
| O | 7.762776453  | 9.771418633  | 4.441898397  |
| O | 11.704116888 | 9.785736227  | 1.479066954  |
| O | 11.703561487 | 9.785939468  | 4.435101937  |
| O | 7.761353400  | 9.774110415  | 7.398415199  |
| O | 7.762357044  | 9.774602980  | 10.355730144 |
| O | 11.702827100 | 9.785756944  | 7.393358045  |
| O | 11.703482775 | 9.785711938  | 10.351165693 |
| O | 9.724340223  | 11.075690899 | 2.959188044  |
| O | 9.725728076  | 11.075919143 | 0.002740327  |
| O | 3.246058414  | 11.077739739 | 2.958666595  |
| O | 3.244044241  | 11.076531723 | 0.001892381  |
| O | 3.244401563  | 11.075573026 | 8.874416394  |
| O | 3.245044379  | 11.076298478 | 5.916614779  |
| O | 9.725510384  | 11.076024871 | 8.874411899  |
| O | 9.724811197  | 11.075676254 | 5.916954998  |
| O | 6.470742070  | 11.773544639 | 8.877903878  |
| O | -0.020748439 | 11.807399797 | 2.954436449  |
| O | 6.470921575  | 11.773051003 | 0.009238799  |
| O | 6.469122496  | 11.766650520 | 5.913632182  |

|   |              |              |              |
|---|--------------|--------------|--------------|
| O | -0.020636216 | 11.806872585 | -0.001892973 |
| O | -0.021091863 | 11.806980814 | 5.911989997  |
| O | 6.474754050  | 11.769091912 | 2.963068035  |
| O | -0.020583871 | 11.805984612 | 8.869874419  |
| O | 8.442364626  | 13.103188807 | 1.482530543  |
| O | 8.443493743  | 13.104366818 | 4.441057549  |
| O | 10.975805907 | 13.118851934 | 1.481450382  |
| O | 10.976483663 | 13.115880830 | 4.441272138  |
| O | 1.964668353  | 13.109583932 | 1.482058187  |
| O | 1.964196340  | 13.107190760 | 4.439278732  |
| O | 4.499060284  | 13.115191096 | 1.481440682  |
| O | 4.497381871  | 13.117380669 | 4.440707747  |
| O | 1.965723823  | 13.109203882 | 7.400592673  |
| O | 1.965856179  | 13.111063412 | 10.354722144 |
| O | 4.500691288  | 13.110098642 | 7.397834011  |
| O | 4.501293059  | 13.107609744 | 10.356934397 |
| O | 8.440261220  | 13.097193377 | 7.400183487  |
| O | 8.439838435  | 13.094990945 | 10.355169539 |
| O | 10.975470796 | 13.117887164 | 7.399873907  |
| O | 10.975394812 | 13.117407459 | 10.355651595 |
| O | -0.023780025 | 14.425755616 | 2.965580287  |
| O | -0.022299172 | 14.424836210 | 5.923141642  |

|   |              |              |              |
|---|--------------|--------------|--------------|
| O | -0.024816661 | 14.421598285 | 8.881103667  |
| O | -0.022651558 | 14.424832638 | 0.008726223  |
| O | 6.470738693  | 14.381992015 | 2.956884703  |
| O | 6.477069434  | 14.376080525 | 5.928783888  |
| O | 6.469495405  | 14.373953103 | 8.881732528  |
| O | 6.475230609  | 14.383373268 | -0.010322154 |
| O | 9.709899275  | 15.132110473 | 8.882850899  |
| O | 3.219174716  | 15.128597512 | 8.885203096  |
| O | 9.721919760  | 15.124415177 | 5.923714432  |
| O | 9.726744580  | 15.125918231 | 2.958803937  |
| O | 3.196330923  | 15.135520563 | 2.959936266  |
| O | 9.707257223  | 15.130886026 | -0.007635297 |
| O | 3.211331689  | 15.135253743 | 0.007208485  |
| O | 3.193485077  | 15.126047177 | 5.921862271  |
| O | 1.256574439  | 16.492856580 | 10.354177272 |
| O | 5.177306845  | 16.374178145 | 4.451295949  |
| O | 5.182043081  | 16.414305198 | 7.389104830  |
| O | 7.744998812  | 16.410118934 | 1.484052066  |
| O | 7.747462917  | 16.403640584 | 4.436076577  |
| O | 5.193248389  | 16.479071199 | 10.347960108 |
| O | 11.667259480 | 16.497940818 | 1.478174884  |
| O | 11.667858004 | 16.500347920 | 4.444286675  |

|   |              |              |              |
|---|--------------|--------------|--------------|
| O | 1.256898640  | 16.506968789 | 4.438856060  |
| O | 1.259157912  | 16.513735749 | 1.484955611  |
| O | 5.180474943  | 16.394338648 | 1.474397574  |
| O | 7.743647587  | 16.412795714 | 7.393300908  |
| O | 7.733004824  | 16.479940956 | 10.342657844 |
| O | 1.257745769  | 16.497922602 | 7.405054207  |
| O | 11.667927364 | 16.496391329 | 7.403309578  |
| O | 11.666304283 | 16.498795931 | 10.354397894 |
| O | 3.259915126  | 17.773236423 | 8.884649826  |
| O | 3.265231961  | 17.772638131 | 0.005422097  |
| O | 9.653368770  | 17.767555321 | 2.959607048  |
| O | 9.668190809  | 17.761925653 | 5.925713516  |
| O | 3.309173072  | 17.802136288 | 2.978798682  |
| O | 3.265848280  | 17.761682764 | 5.924999718  |
| O | 9.653739990  | 17.795782597 | 8.871701382  |
| O | 9.666573314  | 17.769619163 | 0.000547592  |
| O | 6.479552633  | 18.437039980 | 0.108916902  |
| O | 6.482098178  | 18.417473126 | 5.835504417  |
| O | -0.024438297 | 18.539217320 | -0.009241402 |
| O | 6.396416649  | 18.384137679 | 3.000063334  |
| O | -0.024950705 | 18.530291863 | 5.941540929  |
| O | 6.474267230  | 18.459535433 | 8.743734211  |

|   |              |              |              |
|---|--------------|--------------|--------------|
| O | -0.028703949 | 18.544321562 | 8.889175713  |
| O | -0.034233541 | 18.529711430 | 2.961406212  |
| O | 2.030746795  | 19.928222851 | 4.441311530  |
| O | 4.545991936  | 20.048568290 | 1.433404343  |
| O | 4.506564823  | 20.232402419 | 4.593811517  |
| O | 2.035630064  | 19.983440098 | 7.446781465  |
| O | 2.074928718  | 20.019559125 | 10.364854551 |
| O | 4.560671878  | 19.996976518 | 7.434463421  |
| O | 4.680354837  | 20.035645522 | 10.365353642 |
| O | 8.416767858  | 20.040754764 | 1.433887228  |
| O | 8.479511166  | 20.068624494 | 4.490963082  |
| O | 10.926101407 | 19.951998829 | 1.465738071  |
| O | 10.941161790 | 19.933842517 | 4.440499428  |
| O | 8.341605309  | 20.084729822 | 7.388064181  |
| O | 8.251275739  | 20.055080216 | 10.356333454 |
| O | 10.887966809 | 19.992750963 | 7.432674430  |
| O | 10.858463789 | 20.018543992 | 10.336157124 |
| O | 2.040083404  | 19.947786490 | 1.510363344  |
| O | 6.452932607  | 21.113427702 | 2.969990007  |
| O | 6.196749439  | 21.310369266 | 5.856304048  |
| O | -0.013954387 | 21.125717172 | 2.964140151  |
| O | -0.015631761 | 21.123937653 | 5.925717301  |



|   |              |              |              |
|---|--------------|--------------|--------------|
| O | -0.023614028 | 21.142572956 | 8.883657796  |
| O | -0.015144161 | 21.132962766 | 0.008930993  |
| H | 0.000000000  | 0.932899949  | 9.814800036  |
| H | 0.816399984  | 0.932899949  | 8.400899982  |
| H | 6.457700016  | 0.932899949  | 6.856699960  |
| H | 0.834099951  | 0.932899949  | -0.439200043 |
| H | 0.000000000  | 0.932899949  | 3.900000036  |
| H | 0.816399984  | 0.932899949  | 2.486099982  |
| H | 6.457700016  | 0.932899949  | 0.941899960  |
| H | 0.834099951  | 0.932899949  | 5.475599957  |
| H | 6.494400000  | 0.932899949  | 9.814800036  |
| H | 7.310799984  | 0.932899949  | 8.400899982  |
| H | -0.036699984 | 0.932899949  | 6.856699960  |
| H | 7.328499951  | 0.932899949  | -0.439200043 |
| H | 6.494400000  | 0.932899949  | 3.900000036  |
| H | 7.310799984  | 0.932899949  | 2.486099982  |
| H | -0.036699984 | 0.932899949  | 0.941899960  |
| H | 7.328499951  | 0.932899949  | 5.475599957  |
| H | 6.710640919  | 22.108285784 | 5.640107343  |
| H | 5.216791108  | 21.110402305 | 5.252870473  |

10-c:

|    |             |             |             |
|----|-------------|-------------|-------------|
| Ti | 3.247200000 | 3.247194072 | 1.478700000 |
|----|-------------|-------------|-------------|

|    |             |             |              |
|----|-------------|-------------|--------------|
| Ti | 3.247200000 | 3.247194072 | 4.436100000  |
| Ti | 0.000000000 | 3.247194072 | 2.957400000  |
| Ti | 0.000000000 | 3.247194072 | 0.000000000  |
| Ti | 3.247200000 | 3.247194072 | 7.393500000  |
| Ti | 3.247200000 | 3.247194072 | 10.350900000 |
| Ti | 0.000000000 | 3.247194072 | 8.872200000  |
| Ti | 0.000000000 | 3.247194072 | 5.914800000  |
| Ti | 9.741600000 | 3.247194072 | 1.478700000  |
| Ti | 9.741600000 | 3.247194072 | 4.436100000  |
| Ti | 6.494400000 | 3.247194072 | 2.957400000  |
| Ti | 6.494400000 | 3.247194072 | 0.000000000  |
| Ti | 9.741600000 | 3.247194072 | 7.393500000  |
| Ti | 9.741600000 | 3.247194072 | 10.350900000 |
| Ti | 6.494400000 | 3.247194072 | 8.872200000  |
| Ti | 6.494400000 | 3.247194072 | 5.914800000  |
| Ti | 0.000000000 | 6.494391717 | 4.436100000  |
| Ti | 0.000000000 | 6.494391717 | 1.478700000  |
| Ti | 3.247200000 | 6.494391717 | 2.957400000  |
| Ti | 3.247200000 | 6.494391717 | 0.000000000  |
| Ti | 0.000000000 | 6.494391717 | 10.350900000 |
| Ti | 0.000000000 | 6.494391717 | 7.393500000  |
| Ti | 3.247200000 | 6.494391717 | 8.872200000  |

|    |              |             |              |
|----|--------------|-------------|--------------|
| Ti | 3.247200000  | 6.494391717 | 5.914800000  |
| Ti | 6.494400000  | 6.494391717 | 4.436100000  |
| Ti | 6.494400000  | 6.494391717 | 1.478700000  |
| Ti | 9.741600000  | 6.494391717 | 2.957400000  |
| Ti | 9.741600000  | 6.494391717 | 0.000000000  |
| Ti | 6.494400000  | 6.494391717 | 10.350900000 |
| Ti | 6.494400000  | 6.494391717 | 7.393500000  |
| Ti | 9.741600000  | 6.494391717 | 8.872200000  |
| Ti | 9.741600000  | 6.494391717 | 5.914800000  |
| Ti | 3.224911869  | 9.738154624 | 1.479984576  |
| Ti | 3.226775502  | 9.740459570 | 4.436626772  |
| Ti | -0.018007023 | 9.840704513 | 2.961658774  |
| Ti | -0.014531090 | 9.838559589 | 0.003782633  |
| Ti | 3.230657075  | 9.738448234 | 7.393125593  |
| Ti | 3.226494684  | 9.737929237 | 10.350752958 |
| Ti | -0.010084504 | 9.839482210 | 8.872537144  |
| Ti | -0.014524985 | 9.841948605 | 5.916363991  |
| Ti | 9.732132464  | 9.738707197 | 1.480401333  |
| Ti | 9.729051001  | 9.739571596 | 4.437464308  |
| Ti | 6.476080207  | 9.740010939 | 2.965357417  |
| Ti | 6.479957494  | 9.747237959 | 0.009991990  |
| Ti | 9.736348628  | 9.738743987 | 7.395444550  |

|    |              |              |              |
|----|--------------|--------------|--------------|
| Ti | 9.740060178  | 9.740206322  | 10.353112017 |
| Ti | 6.484393428  | 9.741681516  | 8.888881037  |
| Ti | 6.480804103  | 9.731565545  | 5.928954116  |
| Ti | -0.030781897 | 13.185775361 | 1.515869431  |
| Ti | -0.032525514 | 13.186825499 | 4.471576261  |
| Ti | 3.211277915  | 12.999275524 | 2.958889583  |
| Ti | 3.210934231  | 12.999705581 | 5.914773857  |
| Ti | 6.461353116  | 13.060568212 | 1.446615167  |
| Ti | 6.462377672  | 12.992162448 | 4.416462036  |
| Ti | 9.713096468  | 12.998070723 | 2.964503675  |
| Ti | 9.711954753  | 12.998621510 | 5.920806598  |
| Ti | -0.032072984 | 13.186684052 | 7.429088760  |
| Ti | -0.032257815 | 13.183138943 | 10.387766475 |
| Ti | 3.210856948  | 12.996341211 | 8.872252642  |
| Ti | 3.209890062  | 12.995976520 | 0.000403626  |
| Ti | 6.461674329  | 12.995955089 | 7.425194574  |
| Ti | 6.462623031  | 13.080288301 | 10.375979698 |
| Ti | 9.712422090  | 12.997895343 | 8.879098195  |
| Ti | 9.715566938  | 12.997736037 | 0.008014554  |
| Ti | 9.702982739  | 16.327922074 | 1.486977171  |
| Ti | 9.698243775  | 16.337843019 | 4.442720791  |
| Ti | 6.447133107  | 16.274636865 | 2.952148249  |

|    |              |              |              |
|----|--------------|--------------|--------------|
| Ti | -0.050342381 | 16.656186589 | 5.915772748  |
| Ti | 3.189568824  | 16.328685745 | 1.483030698  |
| Ti | 3.194769020  | 16.338721705 | 4.438568128  |
| Ti | -0.047546801 | 16.654356349 | 2.963478522  |
| Ti | 6.449318083  | 16.215516605 | 5.935963154  |
| Ti | 3.190105132  | 16.329395481 | 7.394610445  |
| Ti | 3.183315107  | 16.317136729 | 10.352295656 |
| Ti | -0.049473820 | 16.646748922 | 8.871838842  |
| Ti | 6.447641489  | 16.368155569 | 0.007168856  |
| Ti | 9.699339900  | 16.328973997 | 7.400197446  |
| Ti | 9.705055881  | 16.319733499 | 10.356490669 |
| Ti | 6.442169697  | 16.285490790 | 8.895870083  |
| Ti | -0.051517477 | 16.648865271 | 0.004242331  |
| Ti | 6.431171431  | 19.513219450 | 7.552553704  |
| Ti | 6.430949842  | 19.327378629 | 4.394820138  |
| Ti | 3.183775040  | 19.577756850 | 8.894545641  |
| Ti | 3.237062631  | 19.591277553 | 0.015961206  |
| Ti | 6.431589800  | 19.773865090 | 1.260011626  |
| Ti | 6.429854107  | 19.852451119 | 10.501174130 |
| Ti | 3.216715157  | 19.595360589 | 2.953823202  |
| Ti | 3.255204088  | 19.618822240 | 5.925613201  |
| Ti | -0.066774382 | 20.022024091 | 4.452020394  |

|    |              |              |              |
|----|--------------|--------------|--------------|
| Ti | -0.069192896 | 20.009454941 | 1.490255390  |
| Ti | 9.647243252  | 19.593390330 | 2.956417197  |
| Ti | 9.610383506  | 19.618272168 | 5.922125835  |
| Ti | -0.066727362 | 20.014210923 | 7.401864237  |
| Ti | -0.066026876 | 20.004607162 | 10.366660694 |
| Ti | 9.684900381  | 19.579360989 | 8.890945184  |
| Ti | 9.626011760  | 19.592311617 | 0.013629119  |
| O  | 0.000000000  | 1.266694833  | 2.957400000  |
| O  | 0.000000000  | 1.266694833  | 0.000000000  |
| O  | 0.000000000  | 1.266694833  | 8.872200000  |
| O  | 0.000000000  | 1.266694833  | 5.914800000  |
| O  | 6.494400000  | 1.266694833  | 2.957400000  |
| O  | 6.494400000  | 1.266694833  | 0.000000000  |
| O  | 6.494400000  | 1.266694833  | 8.872200000  |
| O  | 6.494400000  | 1.266694833  | 5.914800000  |
| O  | 9.741600000  | 1.980495667  | 8.872200000  |
| O  | 9.741600000  | 1.980495667  | 5.914800000  |
| O  | 9.741600000  | 1.980495667  | 2.957400000  |
| O  | 9.741600000  | 1.980495667  | 0.000000000  |
| O  | 3.247200000  | 1.980495667  | 8.872200000  |
| O  | 3.247200000  | 1.980495667  | 5.914800000  |
| O  | 3.247200000  | 1.980495667  | 2.957400000  |

|   |              |             |              |
|---|--------------|-------------|--------------|
| O | 3.247200000  | 1.980495667 | 0.000000000  |
| O | 1.266698949  | 3.247194072 | 1.478700000  |
| O | 1.266698949  | 3.247194072 | 4.436100000  |
| O | 5.227599738  | 3.247194072 | 1.478700000  |
| O | 5.227599738  | 3.247194072 | 4.436100000  |
| O | 1.266698949  | 3.247194072 | 7.393500000  |
| O | 1.266698949  | 3.247194072 | 10.350900000 |
| O | 5.227599738  | 3.247194072 | 7.393500000  |
| O | 5.227599738  | 3.247194072 | 10.350900000 |
| O | 7.761098949  | 3.247194072 | 1.478700000  |
| O | 7.761098949  | 3.247194072 | 4.436100000  |
| O | 11.721999738 | 3.247194072 | 1.478700000  |
| O | 11.721999738 | 3.247194072 | 4.436100000  |
| O | 7.761098949  | 3.247194072 | 7.393500000  |
| O | 7.761098949  | 3.247194072 | 10.350900000 |
| O | 11.721999738 | 3.247194072 | 7.393500000  |
| O | 11.721999738 | 3.247194072 | 10.350900000 |
| O | 9.741600000  | 4.513896049 | 8.872200000  |
| O | 9.741600000  | 4.513896049 | 5.914800000  |
| O | 9.741600000  | 4.513896049 | 2.957400000  |
| O | 9.741600000  | 4.513896049 | 0.000000000  |
| O | 3.247200000  | 4.513896049 | 8.872200000  |

|   |              |             |              |
|---|--------------|-------------|--------------|
| O | 3.247200000  | 4.513896049 | 5.914800000  |
| O | 3.247200000  | 4.513896049 | 2.957400000  |
| O | 3.247200000  | 4.513896049 | 0.000000000  |
| O | 0.000000000  | 5.227596870 | 2.957400000  |
| O | 0.000000000  | 5.227596870 | 0.000000000  |
| O | 0.000000000  | 5.227596870 | 8.872200000  |
| O | 0.000000000  | 5.227596870 | 5.914800000  |
| O | 6.494400000  | 5.227596870 | 0.000000000  |
| O | 6.494400000  | 5.227596870 | 2.957400000  |
| O | 6.494400000  | 5.227596870 | 8.872200000  |
| O | 6.494400000  | 5.227596870 | 5.914800000  |
| O | 8.474899752  | 6.494391717 | 7.393500000  |
| O | 11.008298949 | 6.494391717 | 7.393500000  |
| O | 8.474899752  | 6.494391717 | 10.350900000 |
| O | 11.008298949 | 6.494391717 | 10.350900000 |
| O | 8.474899752  | 6.494391717 | 1.478700000  |
| O | 11.008298949 | 6.494391717 | 1.478700000  |
| O | 8.474899752  | 6.494391717 | 4.436100000  |
| O | 11.008298949 | 6.494391717 | 4.436100000  |
| O | 1.980499752  | 6.494391717 | 1.478700000  |
| O | 4.513898949  | 6.494391717 | 1.478700000  |
| O | 1.980499752  | 6.494391717 | 4.436100000  |



|   |             |             |              |
|---|-------------|-------------|--------------|
| O | 4.513898949 | 6.494391717 | 4.436100000  |
| O | 1.980499752 | 6.494391717 | 7.393500000  |
| O | 4.513898949 | 6.494391717 | 7.393500000  |
| O | 1.980499752 | 6.494391717 | 10.350900000 |
| O | 4.513898949 | 6.494391717 | 10.350900000 |
| O | 0.000000000 | 7.761086550 | 8.872200000  |
| O | 0.000000000 | 7.761086550 | 5.914800000  |
| O | 6.494400000 | 7.761086550 | 2.957400000  |
| O | 6.494400000 | 7.761086550 | 0.000000000  |
| O | 0.000000000 | 7.761086550 | 2.957400000  |
| O | 0.000000000 | 7.761086550 | 0.000000000  |
| O | 6.494400000 | 7.761086550 | 8.872200000  |
| O | 6.494400000 | 7.761086550 | 5.914800000  |
| O | 3.247200000 | 8.474887384 | 2.957400000  |
| O | 3.247200000 | 8.474887384 | 0.000000000  |
| O | 3.247200000 | 8.474887384 | 8.872200000  |
| O | 3.247200000 | 8.474887384 | 5.914800000  |
| O | 9.741600000 | 8.474887384 | 2.957400000  |
| O | 9.741600000 | 8.474887384 | 0.000000000  |
| O | 9.741600000 | 8.474887384 | 8.872200000  |
| O | 9.741600000 | 8.474887384 | 5.914800000  |
| O | 1.267282926 | 9.790539714 | 1.479783236  |

|   |              |              |              |
|---|--------------|--------------|--------------|
| O | 1.267304227  | 9.790209671  | 4.436329021  |
| O | 5.208113161  | 9.765117092  | 1.483824583  |
| O | 5.208333711  | 9.766249383  | 4.441579116  |
| O | 1.268868468  | 9.790525784  | 7.393955203  |
| O | 1.268715590  | 9.791040852  | 10.352609850 |
| O | 5.209443734  | 9.765917554  | 7.398156604  |
| O | 5.208918856  | 9.763368291  | 10.355180541 |
| O | 7.758953849  | 9.773216012  | 1.484565707  |
| O | 7.758832014  | 9.774074696  | 4.440528647  |
| O | 11.700026845 | 9.784055292  | 1.479179217  |
| O | 11.699750054 | 9.783825262  | 4.437555869  |
| O | 7.760593945  | 9.773651426  | 7.396571201  |
| O | 7.761037642  | 9.771425420  | 10.356821779 |
| O | 11.701528091 | 9.783922774  | 7.395063991  |
| O | 11.701866709 | 9.783770969  | 10.351221055 |
| O | 9.724269564  | 11.075377643 | 2.959759414  |
| O | 9.722852486  | 11.075636963 | 0.002862527  |
| O | 3.240634421  | 11.075142255 | 2.958415926  |
| O | 3.243367395  | 11.074730058 | 0.001476689  |
| O | 3.242050590  | 11.074223920 | 8.873807998  |
| O | 3.241067988  | 11.075599101 | 5.916008394  |
| O | 9.723334760  | 11.074903653 | 8.874624358  |

|   |              |              |              |
|---|--------------|--------------|--------------|
| O | 9.723801707  | 11.075762337 | 5.916813989  |
| O | 6.464798785  | 11.765331418 | 8.886026082  |
| O | -0.029271819 | 11.806756499 | 2.955686009  |
| O | 6.463084783  | 11.769557330 | 0.003343400  |
| O | 6.462951388  | 11.769575904 | 5.918344148  |
| O | -0.028769023 | 11.806757570 | -0.001479173 |
| O | -0.028629653 | 11.806189639 | 5.913153320  |
| O | 6.462511717  | 11.770614612 | 2.956512070  |
| O | -0.027575872 | 11.806776501 | 8.870174181  |
| O | 8.435893346  | 13.097244098 | 1.486788844  |
| O | 8.432689529  | 13.089803478 | 4.441744375  |
| O | 10.969466853 | 13.121109373 | 1.485708092  |
| O | 10.968356441 | 13.121979130 | 4.442646974  |
| O | 1.957190441  | 13.104361103 | 1.482515874  |
| O | 1.957475935  | 13.104895816 | 4.439765165  |
| O | 4.490378440  | 13.114660670 | 1.484460069  |
| O | 4.493476919  | 13.107161114 | 4.439691703  |
| O | 1.957409173  | 13.104634353 | 7.394195580  |
| O | 1.956558017  | 13.102011152 | 10.353563789 |
| O | 4.493221559  | 13.106602469 | 7.396251565  |
| O | 4.489874605  | 13.117772864 | 10.352889857 |
| O | 8.432411179  | 13.090013506 | 7.398086218  |

|   |              |              |              |
|---|--------------|--------------|--------------|
| O | 8.436744762  | 13.100221989 | 10.355880498 |
| O | 10.968298121 | 13.120470003 | 7.396112922  |
| O | 10.969792223 | 13.117208504 | 10.355672416 |
| O | -0.029903205 | 14.424007887 | 2.966756267  |
| O | -0.030081152 | 14.422542695 | 5.924036670  |
| O | -0.030799692 | 14.424719052 | 8.881524564  |
| O | -0.030955817 | 14.424070395 | 0.008889116  |
| O | 6.464847233  | 14.380792572 | 2.977991193  |
| O | 6.464297936  | 14.362340507 | 5.917175739  |
| O | 6.463915157  | 14.372492197 | 8.865087926  |
| O | 6.465593699  | 14.386150418 | 0.011164658  |
| O | 9.706502704  | 15.121258691 | 8.873160564  |
| O | 3.179217790  | 15.121012945 | 8.870392910  |
| O | 9.687379164  | 15.131500036 | 5.917819032  |
| O | 9.693035007  | 15.129218307 | 2.973939555  |
| O | 3.193164384  | 15.129903755 | 2.971074663  |
| O | 9.707603245  | 15.123401473 | 0.011176369  |
| O | 3.177716934  | 15.123898323 | 0.009567189  |
| O | 3.197072324  | 15.130758867 | 5.915155834  |
| O | 1.239335834  | 16.505755773 | 10.357015312 |
| O | 5.175662982  | 16.462369364 | 4.451041968  |
| O | 5.167001661  | 16.404437831 | 7.405308898  |

|   |              |              |              |
|---|--------------|--------------|--------------|
| O | 7.728882439  | 16.408501936 | 1.490495767  |
| O | 7.716748042  | 16.475072460 | 4.450293982  |
| O | 5.160518171  | 16.377716109 | 10.356084322 |
| O | 11.651402103 | 16.493423797 | 1.489754170  |
| O | 11.650858262 | 16.487028315 | 4.445858237  |
| O | 1.241978535  | 16.502161729 | 4.446187810  |
| O | 1.240503137  | 16.507137025 | 1.487753429  |
| O | 5.164334671  | 16.392294452 | 1.489395141  |
| O | 7.723956566  | 16.422215165 | 7.407633533  |
| O | 7.730608910  | 16.393503539 | 10.353122072 |
| O | 1.240984242  | 16.501862047 | 7.394888913  |
| O | 11.651114142 | 16.487485160 | 7.394777005  |
| O | 11.652370678 | 16.491009909 | 10.356420756 |
| O | 3.245535875  | 17.755965228 | 8.876882865  |
| O | 3.268401358  | 17.766363378 | 0.005799107  |
| O | 9.649466935  | 17.768135039 | 2.971200056  |
| O | 9.637802473  | 17.792855427 | 5.926593401  |
| O | 3.243864476  | 17.769393419 | 2.970317213  |
| O | 3.256671173  | 17.793059025 | 5.927062800  |
| O | 9.649929336  | 17.756728542 | 8.877306129  |
| O | 9.625998641  | 17.767222420 | 0.006440153  |
| O | 6.436723883  | 18.401202419 | -0.040589724 |

|   |              |              |              |
|---|--------------|--------------|--------------|
| O | 6.432618383  | 18.426814353 | 6.026608411  |
| O | -0.064886979 | 18.525779485 | 0.012318399  |
| O | 6.432205989  | 18.435763384 | 2.846125696  |
| O | -0.061651989 | 18.540833247 | 5.917881138  |
| O | 6.429678628  | 18.427291915 | 8.974577026  |
| O | -0.063609271 | 18.527898692 | 8.862500556  |
| O | -0.062072566 | 18.535364672 | 2.987319188  |
| O | 2.050528737  | 20.014907086 | 4.464255749  |
| O | 4.496291592  | 20.042580361 | 1.542380511  |
| O | 4.649527479  | 20.050189217 | 4.445794357  |
| O | 2.023368637  | 19.987449553 | 7.379773760  |
| O | 1.976022513  | 19.924501291 | 10.367054502 |
| O | 4.566719463  | 20.076658405 | 7.410176424  |
| O | 4.465544634  | 20.077736047 | 10.294246744 |
| O | 8.370252367  | 20.034365354 | 1.542359336  |
| O | 8.217646697  | 20.044243793 | 4.445578704  |
| O | 10.874228166 | 19.948250122 | 1.489990407  |
| O | 10.819447252 | 20.022351634 | 4.463443647  |
| O | 8.300586159  | 20.069631411 | 7.409085498  |
| O | 8.400724092  | 20.069521754 | 10.289906109 |
| O | 10.845164817 | 19.998809258 | 7.376908868  |
| O | 10.886642211 | 19.939818301 | 10.367536913 |

|   |              |              |              |
|---|--------------|--------------|--------------|
| O | 1.987874273  | 19.936223186 | 1.489544904  |
| O | -0.057337369 | 21.126222953 | 2.971766103  |
| O | -0.056708451 | 21.134745857 | 5.926583583  |
| O | -0.059040850 | 21.120735804 | 8.880745230  |
| O | -0.059325435 | 21.123209700 | 0.012469108  |
| O | 6.438630119  | 21.439836974 | 8.789387595  |
| O | 6.439386977  | 21.156372267 | 0.018982249  |
| H | 0.000000000  | 0.932897449  | 9.814799089  |
| H | 0.816399334  | 0.932897449  | 8.400899272  |
| H | 6.457698847  | 0.932897449  | 6.856699960  |
| H | 0.834099172  | 0.932897449  | -0.439201108 |
| H | 0.000000000  | 0.932897449  | 3.899999089  |
| H | 0.816399334  | 0.932897449  | 2.486099272  |
| H | 6.457698847  | 0.932897449  | 0.941899960  |
| H | 0.834099172  | 0.932897449  | 5.475598892  |
| H | 6.494400000  | 0.932897449  | 9.814799089  |
| H | 7.310799334  | 0.932897449  | 8.400899272  |
| H | -0.036701153 | 0.932897449  | 6.856699960  |
| H | 7.328499172  | 0.932897449  | -0.439201108 |
| H | 6.494400000  | 0.932897449  | 3.899999089  |
| H | 7.310799334  | 0.932897449  | 2.486099272  |
| H | -0.036701153 | 0.932897449  | 0.941899960  |

|   |             |              |             |
|---|-------------|--------------|-------------|
| H | 7.328499172 | 0.932897449  | 5.475598892 |
| H | 7.251118786 | 21.981694168 | 8.829570735 |
| H | 5.640011543 | 22.002321518 | 8.822499828 |

11-Ea:

|    |             |             |              |
|----|-------------|-------------|--------------|
| Ti | 3.247200000 | 3.247194072 | 1.478700000  |
| Ti | 3.247200000 | 3.247194072 | 4.436100000  |
| Ti | 0.000000000 | 3.247194072 | 2.957400000  |
| Ti | 0.000000000 | 3.247194072 | 0.000000000  |
| Ti | 3.247200000 | 3.247194072 | 7.393500000  |
| Ti | 3.247200000 | 3.247194072 | 10.350900000 |
| Ti | 0.000000000 | 3.247194072 | 8.872200000  |
| Ti | 0.000000000 | 3.247194072 | 5.914800000  |
| Ti | 9.741600000 | 3.247194072 | 1.478700000  |
| Ti | 9.741600000 | 3.247194072 | 4.436100000  |
| Ti | 6.494400000 | 3.247194072 | 2.957400000  |
| Ti | 6.494400000 | 3.247194072 | 0.000000000  |
| Ti | 9.741600000 | 3.247194072 | 7.393500000  |
| Ti | 9.741600000 | 3.247194072 | 10.350900000 |
| Ti | 6.494400000 | 3.247194072 | 8.872200000  |
| Ti | 6.494400000 | 3.247194072 | 5.914800000  |
| Ti | 0.000000000 | 6.494391717 | 4.436100000  |
| Ti | 0.000000000 | 6.494391717 | 1.478700000  |



|    |              |             |              |
|----|--------------|-------------|--------------|
| Ti | 3.247200000  | 6.494391717 | 2.957400000  |
| Ti | 3.247200000  | 6.494391717 | 0.000000000  |
| Ti | 0.000000000  | 6.494391717 | 10.350900000 |
| Ti | 0.000000000  | 6.494391717 | 7.393500000  |
| Ti | 3.247200000  | 6.494391717 | 8.872200000  |
| Ti | 3.247200000  | 6.494391717 | 5.914800000  |
| Ti | 6.494400000  | 6.494391717 | 4.436100000  |
| Ti | 6.494400000  | 6.494391717 | 1.478700000  |
| Ti | 9.741600000  | 6.494391717 | 2.957400000  |
| Ti | 9.741600000  | 6.494391717 | 0.000000000  |
| Ti | 6.494400000  | 6.494391717 | 10.350900000 |
| Ti | 6.494400000  | 6.494391717 | 7.393500000  |
| Ti | 9.741600000  | 6.494391717 | 8.872200000  |
| Ti | 9.741600000  | 6.494391717 | 5.914800000  |
| Ti | 3.226071639  | 9.738227848 | 1.479076773  |
| Ti | 3.226761344  | 9.738969731 | 4.436648065  |
| Ti | -0.017142748 | 9.837039746 | 2.965738685  |
| Ti | -0.011477943 | 9.838348490 | 0.006801665  |
| Ti | 3.231644223  | 9.738110333 | 7.393721687  |
| Ti | 3.230877235  | 9.738335362 | 10.351053193 |
| Ti | -0.008602612 | 9.838511368 | 8.876894340  |
| Ti | -0.015534085 | 9.837862712 | 5.921026983  |

|    |              |              |              |
|----|--------------|--------------|--------------|
| Ti | 9.736552942  | 9.739420147  | 1.481257678  |
| Ti | 9.729317011  | 9.738595039  | 4.437553740  |
| Ti | 6.474720669  | 9.751051674  | 2.965189555  |
| Ti | 6.485745433  | 9.755538692  | 0.011912289  |
| Ti | 9.736926890  | 9.738834356  | 7.396390208  |
| Ti | 9.742179430  | 9.739220478  | 10.353755902 |
| Ti | 6.484513445  | 9.750803784  | 8.890222869  |
| Ti | 6.481420942  | 9.732040250  | 5.928698006  |
| Ti | -0.032338475 | 13.179937095 | 1.517981133  |
| Ti | -0.032224304 | 13.181876992 | 4.475718040  |
| Ti | 3.211963594  | 12.996413720 | 2.959393997  |
| Ti | 3.212307277  | 12.996911643 | 5.916816592  |
| Ti | 6.461776940  | 13.099499394 | 1.452453075  |
| Ti | 6.461899555  | 12.997584945 | 4.420205868  |
| Ti | 9.712946967  | 12.998021074 | 2.965256392  |
| Ti | 9.708836661  | 12.998011787 | 5.922370826  |
| Ti | -0.034209122 | 13.181167256 | 7.431839024  |
| Ti | -0.033282501 | 13.180431802 | 10.389347620 |
| Ti | 3.211355718  | 12.996357999 | 8.873521603  |
| Ti | 3.208732370  | 12.996288704 | 0.001795615  |
| Ti | 6.461108407  | 12.995884722 | 7.431527550  |
| Ti | 6.458575071  | 13.098269232 | 10.407037840 |

|    |              |              |              |
|----|--------------|--------------|--------------|
| Ti | 9.709068252  | 12.997847123 | 8.880387384  |
| Ti | 9.713459765  | 12.998237888 | 0.007799137  |
| Ti | 9.691501809  | 16.326913727 | 1.487389078  |
| Ti | 9.688194341  | 16.329485850 | 4.446645497  |
| Ti | 6.439370871  | 16.279162817 | 2.957502326  |
| Ti | -0.061060219 | 16.642254046 | 5.931740934  |
| Ti | 3.175484809  | 16.323290751 | 1.486319445  |
| Ti | 3.182210279  | 16.329058651 | 4.444456075  |
| Ti | -0.060284917 | 16.640765279 | 2.974830916  |
| Ti | 6.438348392  | 16.251081274 | 5.924986232  |
| Ti | 3.180809697  | 16.328389278 | 7.402854138  |
| Ti | 3.172120839  | 16.322543868 | 10.362414459 |
| Ti | -0.063342091 | 16.640289860 | 8.887245832  |
| Ti | 6.433756851  | 16.491575697 | 0.011903298  |
| Ti | 9.682514209  | 16.327678827 | 7.405159609  |
| Ti | 9.689551151  | 16.325039195 | 10.365198438 |
| Ti | 6.432593185  | 16.274617934 | 8.895894097  |
| Ti | -0.063242857 | 16.637005143 | 0.016830090  |
| Ti | 6.411925276  | 19.565306287 | 7.581194230  |
| Ti | 6.407019796  | 19.773284300 | 10.371189184 |
| Ti | 3.213998289  | 19.598912126 | 8.886980849  |
| Ti | 3.177482226  | 19.587699583 | 0.016119959  |

|    |              |              |              |
|----|--------------|--------------|--------------|
| Ti | 6.404770006  | 19.776460431 | 1.509098760  |
| Ti | 6.407595850  | 19.567938061 | 4.289119823  |
| Ti | 3.212841507  | 19.598791039 | 2.977318799  |
| Ti | 3.192028124  | 19.577942588 | 5.931940736  |
| Ti | -0.076577678 | 20.000260878 | 1.494186248  |
| Ti | -0.077344537 | 20.005911976 | 4.447949355  |
| Ti | 9.644816425  | 19.594484402 | 2.978779991  |
| Ti | 9.629231943  | 19.585159964 | 5.934156538  |
| Ti | -0.076649766 | 20.004782900 | 7.410969835  |
| Ti | -0.077850061 | 20.000016203 | 10.364356525 |
| Ti | 9.645827473  | 19.593778953 | 8.891800464  |
| Ti | 9.641016032  | 19.600021915 | 0.021414533  |
| O  | 0.000000000  | 1.266694833  | 2.957400000  |
| O  | 0.000000000  | 1.266694833  | 0.000000000  |
| O  | 0.000000000  | 1.266694833  | 8.872200000  |
| O  | 0.000000000  | 1.266694833  | 5.914800000  |
| O  | 6.494400000  | 1.266694833  | 2.957400000  |
| O  | 6.494400000  | 1.266694833  | 0.000000000  |
| O  | 6.494400000  | 1.266694833  | 8.872200000  |
| O  | 6.494400000  | 1.266694833  | 5.914800000  |
| O  | 9.741600000  | 1.980495667  | 8.872200000  |
| O  | 9.741600000  | 1.980495667  | 5.914800000  |

|   |              |             |              |
|---|--------------|-------------|--------------|
| O | 9.741600000  | 1.980495667 | 2.957400000  |
| O | 9.741600000  | 1.980495667 | 0.000000000  |
| O | 3.247200000  | 1.980495667 | 8.872200000  |
| O | 3.247200000  | 1.980495667 | 5.914800000  |
| O | 3.247200000  | 1.980495667 | 2.957400000  |
| O | 3.247200000  | 1.980495667 | 0.000000000  |
| O | 1.266698949  | 3.247194072 | 1.478700000  |
| O | 1.266698949  | 3.247194072 | 4.436100000  |
| O | 5.227599738  | 3.247194072 | 1.478700000  |
| O | 5.227599738  | 3.247194072 | 4.436100000  |
| O | 1.266698949  | 3.247194072 | 7.393500000  |
| O | 1.266698949  | 3.247194072 | 10.350900000 |
| O | 5.227599738  | 3.247194072 | 7.393500000  |
| O | 5.227599738  | 3.247194072 | 10.350900000 |
| O | 7.761098949  | 3.247194072 | 1.478700000  |
| O | 7.761098949  | 3.247194072 | 4.436100000  |
| O | 11.721999738 | 3.247194072 | 1.478700000  |
| O | 11.721999738 | 3.247194072 | 4.436100000  |
| O | 7.761098949  | 3.247194072 | 7.393500000  |
| O | 7.761098949  | 3.247194072 | 10.350900000 |
| O | 11.721999738 | 3.247194072 | 7.393500000  |
| O | 11.721999738 | 3.247194072 | 10.350900000 |

|   |              |             |              |
|---|--------------|-------------|--------------|
| O | 9.741600000  | 4.513896049 | 8.872200000  |
| O | 9.741600000  | 4.513896049 | 5.914800000  |
| O | 9.741600000  | 4.513896049 | 2.957400000  |
| O | 9.741600000  | 4.513896049 | 0.000000000  |
| O | 3.247200000  | 4.513896049 | 8.872200000  |
| O | 3.247200000  | 4.513896049 | 5.914800000  |
| O | 3.247200000  | 4.513896049 | 2.957400000  |
| O | 3.247200000  | 4.513896049 | 0.000000000  |
| O | 0.000000000  | 5.227596870 | 2.957400000  |
| O | 0.000000000  | 5.227596870 | 0.000000000  |
| O | 0.000000000  | 5.227596870 | 8.872200000  |
| O | 0.000000000  | 5.227596870 | 5.914800000  |
| O | 6.494400000  | 5.227596870 | 0.000000000  |
| O | 6.494400000  | 5.227596870 | 2.957400000  |
| O | 6.494400000  | 5.227596870 | 8.872200000  |
| O | 6.494400000  | 5.227596870 | 5.914800000  |
| O | 8.474899752  | 6.494391717 | 7.393500000  |
| O | 11.008298949 | 6.494391717 | 7.393500000  |
| O | 8.474899752  | 6.494391717 | 10.350900000 |
| O | 11.008298949 | 6.494391717 | 10.350900000 |
| O | 8.474899752  | 6.494391717 | 1.478700000  |
| O | 11.008298949 | 6.494391717 | 1.478700000  |

|   |              |             |              |
|---|--------------|-------------|--------------|
| O | 8.474899752  | 6.494391717 | 4.436100000  |
| O | 11.008298949 | 6.494391717 | 4.436100000  |
| O | 1.980499752  | 6.494391717 | 1.478700000  |
| O | 4.513898949  | 6.494391717 | 1.478700000  |
| O | 1.980499752  | 6.494391717 | 4.436100000  |
| O | 4.513898949  | 6.494391717 | 4.436100000  |
| O | 1.980499752  | 6.494391717 | 7.393500000  |
| O | 4.513898949  | 6.494391717 | 7.393500000  |
| O | 1.980499752  | 6.494391717 | 10.350900000 |
| O | 4.513898949  | 6.494391717 | 10.350900000 |
| O | 0.000000000  | 7.761086550 | 8.872200000  |
| O | 0.000000000  | 7.761086550 | 5.914800000  |
| O | 6.494400000  | 7.761086550 | 2.957400000  |
| O | 6.494400000  | 7.761086550 | 0.000000000  |
| O | 0.000000000  | 7.761086550 | 2.957400000  |
| O | 0.000000000  | 7.761086550 | 0.000000000  |
| O | 6.494400000  | 7.761086550 | 8.872200000  |
| O | 6.494400000  | 7.761086550 | 5.914800000  |
| O | 3.247200000  | 8.474887384 | 2.957400000  |
| O | 3.247200000  | 8.474887384 | 0.000000000  |
| O | 3.247200000  | 8.474887384 | 8.872200000  |
| O | 3.247200000  | 8.474887384 | 5.914800000  |

|   |              |              |              |
|---|--------------|--------------|--------------|
| O | 9.741600000  | 8.474887384  | 2.957400000  |
| O | 9.741600000  | 8.474887384  | 0.000000000  |
| O | 9.741600000  | 8.474887384  | 8.872200000  |
| O | 9.741600000  | 8.474887384  | 5.914800000  |
| O | 1.268424641  | 9.790652943  | 1.482843672  |
| O | 1.267612322  | 9.789697104  | 4.439181493  |
| O | 5.209454515  | 9.766086148  | 1.482929082  |
| O | 5.209183568  | 9.766485128  | 4.444329261  |
| O | 1.269126556  | 9.789707819  | 7.395702790  |
| O | 1.270014730  | 9.790751171  | 10.354793949 |
| O | 5.210561030  | 9.766344753  | 7.398562832  |
| O | 5.210924717  | 9.766177231  | 10.357439403 |
| O | 7.759617057  | 9.776219978  | 1.485906711  |
| O | 7.758479758  | 9.776387500  | 4.442519569  |
| O | 11.700839944 | 9.780962029  | 1.481255194  |
| O | 11.699961252 | 9.780122633  | 4.439784447  |
| O | 7.760407945  | 9.775974231  | 7.397676677  |
| O | 7.761351841  | 9.775823854  | 10.356709871 |
| O | 11.701754096 | 9.780459820  | 7.397755344  |
| O | 11.702612006 | 9.781438877  | 10.353801801 |
| O | 9.725698721  | 11.074496099 | 2.961687047  |
| O | 9.724332300  | 11.075086891 | 0.003464180  |



|   |              |              |             |
|---|--------------|--------------|-------------|
| O | 3.242706395  | 11.073454891 | 2.960745647 |
| O | 3.244114511  | 11.073819939 | 0.002527157 |
| O | 3.242767312  | 11.073230933 | 8.873889858 |
| O | 3.242686132  | 11.073256293 | 5.917473844 |
| O | 9.725315941  | 11.074657549 | 8.874749752 |
| O | 9.724987974  | 11.074470381 | 5.918259093 |
| O | 6.461797333  | 11.772918843 | 8.885287796 |
| O | -0.032410433 | 11.803137452 | 2.960142220 |
| O | 6.462757075  | 11.778560298 | 0.009743568 |
| O | 6.460876816  | 11.778605304 | 5.924086709 |
| O | -0.031434585 | 11.803039582 | 0.001865410 |
| O | -0.032321849 | 11.803271041 | 5.916703383 |
| O | 6.460172953  | 11.773415337 | 2.962800804 |
| O | -0.030897238 | 11.803122807 | 8.873165177 |
| O | 8.435643052  | 13.096754748 | 1.489649359 |
| O | 8.430274002  | 13.090512143 | 4.445148343 |
| O | 10.967489958 | 13.119375574 | 1.487157336 |
| O | 10.966015080 | 13.124399091 | 4.445737575 |
| O | 1.954525659  | 13.097486987 | 1.485353085 |
| O | 1.955279269  | 13.102170459 | 4.443567080 |
| O | 4.486200203  | 13.116305528 | 1.488262221 |
| O | 4.491191799  | 13.110600494 | 4.443350362 |

|   |              |              |              |
|---|--------------|--------------|--------------|
| O | 1.955125222  | 13.102553009 | 7.396962287  |
| O | 1.954391095  | 13.097950976 | 10.355204200 |
| O | 4.490984628  | 13.110337602 | 7.398932626  |
| O | 4.485838855  | 13.116220517 | 10.353589696 |
| O | 8.429830045  | 13.091574425 | 7.400001903  |
| O | 8.434601221  | 13.097267315 | 10.356330378 |
| O | 10.965325374 | 13.124184062 | 7.399371267  |
| O | 10.966908449 | 13.119201265 | 10.356789485 |
| O | -0.034369014 | 14.417601332 | 2.970487205  |
| O | -0.033923369 | 14.418766842 | 5.928346075  |
| O | -0.034897399 | 14.417729563 | 8.886131128  |
| O | -0.034033643 | 14.417587044 | 0.013552700  |
| O | 6.461728232  | 14.374396375 | 2.983367865  |
| O | 6.456996412  | 14.393305643 | 5.924948496  |
| O | 6.459507797  | 14.374006324 | 8.867639334  |
| O | 6.458331531  | 14.389132952 | 0.011172111  |
| O | 9.682400816  | 15.125686058 | 8.880520822  |
| O | 3.183888043  | 15.125426024 | 8.877752341  |
| O | 9.672273969  | 15.126984086 | 5.927013589  |
| O | 9.683110654  | 15.126144333 | 2.974219089  |
| O | 3.183693081  | 15.124722717 | 2.973611402  |
| O | 9.696297793  | 15.122406699 | 0.013116897  |

|   |              |              |              |
|---|--------------|--------------|--------------|
| O | 3.171365800  | 15.119914229 | 0.011458032  |
| O | 3.196797871  | 15.126554029 | 5.925898294  |
| O | 1.226700979  | 16.491922886 | 10.364940671 |
| O | 5.162929932  | 16.462660473 | 4.452106632  |
| O | 5.161799127  | 16.464047441 | 7.402847513  |
| O | 7.717557634  | 16.400825571 | 1.486545509  |
| O | 7.709137255  | 16.464459995 | 4.453403038  |
| O | 5.152567597  | 16.387988886 | 10.366509985 |
| O | 11.640587628 | 16.479545189 | 1.495619522  |
| O | 11.638890512 | 16.479455178 | 4.452734547  |
| O | 1.229849724  | 16.490278027 | 4.450071231  |
| O | 1.227440301  | 16.492242213 | 1.494853082  |
| O | 5.154012601  | 16.387814935 | 1.491220567  |
| O | 7.706911234  | 16.464956132 | 7.403554569  |
| O | 7.716080158  | 16.399371095 | 10.368878981 |
| O | 1.229362254  | 16.490250523 | 7.410040502  |
| O | 11.637599165 | 16.479849515 | 7.407767799  |
| O | 11.639704000 | 16.479455535 | 10.366097014 |
| O | 3.237151864  | 17.773304647 | 8.895939050  |
| O | 3.234446038  | 17.759773942 | 0.013910072  |
| O | 9.628704468  | 17.770164234 | 2.967048340  |
| O | 9.644817724  | 17.763955562 | 5.930080294  |

|   |              |              |              |
|---|--------------|--------------|--------------|
| O | 3.236418776  | 17.772943885 | 2.963079036  |
| O | 3.205493353  | 17.756627815 | 5.928751594  |
| O | 9.627432604  | 17.770044576 | 8.894720956  |
| O | 9.623892897  | 17.769454141 | 0.016368972  |
| O | 6.411252716  | 18.453717169 | 0.021361064  |
| O | 6.460184513  | 18.649583235 | 5.934360480  |
| O | -0.074133576 | 18.516585064 | 0.018332568  |
| O | 6.444521319  | 18.379933913 | 2.848886724  |
| O | -0.067475127 | 18.522413686 | 5.932864864  |
| O | 6.444185689  | 18.383248634 | 9.022084463  |
| O | -0.075850306 | 18.519686185 | 8.887873155  |
| O | -0.075244378 | 18.520390921 | 2.978096003  |
| O | 1.990160042  | 19.967287264 | 4.436717623  |
| O | 4.490293624  | 20.093833874 | 1.448570009  |
| O | 4.510885418  | 19.977343227 | 4.481110090  |
| O | 1.991078220  | 19.967142959 | 7.427767985  |
| O | 1.980285177  | 19.945757295 | 10.359789826 |
| O | 4.513649694  | 19.976752435 | 7.385007885  |
| O | 4.491581463  | 20.093453467 | 10.417871979 |
| O | 8.351224295  | 20.125595900 | 1.464092218  |
| O | 8.336703596  | 20.033600254 | 4.464716039  |
| O | 10.859214412 | 19.957477048 | 1.499868359  |

|   |              |              |              |
|---|--------------|--------------|--------------|
| O | 10.852414905 | 19.968354904 | 4.447631021  |
| O | 8.337015977  | 20.033050896 | 7.403736508  |
| O | 8.351872046  | 20.125262642 | 10.408266935 |
| O | 10.852187341 | 19.966316065 | 7.419802406  |
| O | 10.858820202 | 19.956560142 | 10.369169753 |
| O | 1.980048391  | 19.945516549 | 1.503058211  |
| O | -0.070191086 | 21.112067166 | 0.016317395  |
| O | 6.421280070  | 21.173953504 | 3.043860654  |
| O | -0.076385444 | 21.117818636 | 2.971364251  |
| O | -0.071158621 | 21.114736803 | 5.931158562  |
| O | -0.076987865 | 21.116911731 | 8.890725390  |
| O | 6.423261901  | 21.168901055 | 8.830061545  |
| H | 0.000000000  | 0.932897449  | 9.814799089  |
| H | 0.816399334  | 0.932897449  | 8.400899272  |
| H | 6.457698847  | 0.932897449  | 6.856699960  |
| H | 0.834099172  | 0.932897449  | -0.439201108 |
| H | 0.000000000  | 0.932897449  | 3.899999089  |
| H | 0.816399334  | 0.932897449  | 2.486099272  |
| H | 6.457698847  | 0.932897449  | 0.941899960  |
| H | 0.834099172  | 0.932897449  | 5.475598892  |
| H | 6.494400000  | 0.932897449  | 9.814799089  |
| H | 7.310799334  | 0.932897449  | 8.400899272  |

|   |              |              |              |
|---|--------------|--------------|--------------|
| H | -0.036701153 | 0.932897449  | 6.856699960  |
| H | 7.328499172  | 0.932897449  | -0.439201108 |
| H | 6.494400000  | 0.932897449  | 3.899999089  |
| H | 7.310799334  | 0.932897449  | 2.486099272  |
| H | -0.036701153 | 0.932897449  | 0.941899960  |
| H | 7.328499172  | 0.932897449  | 5.475598892  |
| H | 7.273139477  | 21.642520363 | 3.097143065  |
| H | 7.276697889  | 21.636874979 | 8.782728358  |

TS11-E1:

|    |             |             |              |
|----|-------------|-------------|--------------|
| Ti | 3.247200000 | 3.247190143 | 1.478700000  |
| Ti | 3.247200000 | 3.247190143 | 4.436100000  |
| Ti | 0.000000000 | 3.247190143 | 2.957400000  |
| Ti | 0.000000000 | 3.247190143 | 0.000000000  |
| Ti | 3.247200000 | 3.247190143 | 7.393500000  |
| Ti | 3.247200000 | 3.247190143 | 10.350900000 |
| Ti | 0.000000000 | 3.247190143 | 8.872200000  |
| Ti | 0.000000000 | 3.247190143 | 5.914800000  |
| Ti | 9.741600000 | 3.247190143 | 1.478700000  |
| Ti | 9.741600000 | 3.247190143 | 4.436100000  |
| Ti | 6.494400000 | 3.247190143 | 2.957400000  |
| Ti | 6.494400000 | 3.247190143 | 0.000000000  |
| Ti | 9.741600000 | 3.247190143 | 7.393500000  |

|    |              |             |              |
|----|--------------|-------------|--------------|
| Ti | 9.741600000  | 3.247190143 | 10.350900000 |
| Ti | 6.494400000  | 3.247190143 | 8.872200000  |
| Ti | 6.494400000  | 3.247190143 | 5.914800000  |
| Ti | 0.000000000  | 6.494389931 | 4.436100000  |
| Ti | 0.000000000  | 6.494389931 | 1.478700000  |
| Ti | 3.247200000  | 6.494389931 | 2.957400000  |
| Ti | 3.247200000  | 6.494389931 | 0.000000000  |
| Ti | 0.000000000  | 6.494389931 | 10.350900000 |
| Ti | 0.000000000  | 6.494389931 | 7.393500000  |
| Ti | 3.247200000  | 6.494389931 | 8.872200000  |
| Ti | 3.247200000  | 6.494389931 | 5.914800000  |
| Ti | 6.494400000  | 6.494389931 | 4.436100000  |
| Ti | 6.494400000  | 6.494389931 | 1.478700000  |
| Ti | 9.741600000  | 6.494389931 | 2.957400000  |
| Ti | 9.741600000  | 6.494389931 | 0.000000000  |
| Ti | 6.494400000  | 6.494389931 | 10.350900000 |
| Ti | 6.494400000  | 6.494389931 | 7.393500000  |
| Ti | 9.741600000  | 6.494389931 | 8.872200000  |
| Ti | 9.741600000  | 6.494389931 | 5.914800000  |
| Ti | 3.226534949  | 9.738012820 | 1.479379137  |
| Ti | 3.227341424  | 9.739764836 | 4.436590337  |
| Ti | -0.016857384 | 9.839624014 | 2.961886376  |

|    |              |              |              |
|----|--------------|--------------|--------------|
| Ti | -0.009021241 | 9.840575568  | 0.001045618  |
| Ti | 3.229142321  | 9.738921153  | 7.392947084  |
| Ti | 3.231675397  | 9.738044967  | 10.350593377 |
| Ti | -0.011012424 | 9.840201233  | 8.871842391  |
| Ti | -0.015991031 | 9.842215783  | 5.916265214  |
| Ti | 9.739955228  | 9.735866110  | 1.482939019  |
| Ti | 9.727887854  | 9.744058256  | 4.438412687  |
| Ti | 6.475518701  | 9.753375908  | 2.960764930  |
| Ti | 6.487877155  | 9.756467385  | 0.009461787  |
| Ti | 9.734345625  | 9.741282892  | 7.391614362  |
| Ti | 9.742047594  | 9.735248886  | 10.349701307 |
| Ti | 6.482389906  | 9.757442513  | 8.887274696  |
| Ti | 6.479437422  | 9.728441206  | 5.926823960  |
| Ti | -0.035983652 | 13.182979994 | 1.515277833  |
| Ti | -0.035253162 | 13.187644535 | 4.471987694  |
| Ti | 3.210316094  | 12.996402647 | 2.958064469  |
| Ti | 3.210475467  | 12.999602353 | 5.914890851  |
| Ti | 6.455353459  | 13.100946012 | 1.426148303  |
| Ti | 6.457496481  | 12.981415323 | 4.418180877  |
| Ti | 9.705678045  | 13.000039553 | 2.958443962  |
| Ti | 9.707584281  | 13.006248583 | 5.915934340  |
| Ti | -0.034716335 | 13.186167555 | 7.429952676  |



|    |              |              |              |
|----|--------------|--------------|--------------|
| Ti | -0.035887535 | 13.186944443 | 10.386611670 |
| Ti | 3.210251020  | 12.995823286 | 8.872043258  |
| Ti | 3.206467513  | 12.996090106 | -0.000061869 |
| Ti | 6.459235811  | 13.002812417 | 7.430672034  |
| Ti | 6.458493631  | 13.117619629 | 10.399335114 |
| Ti | 9.706702342  | 12.995898653 | 8.873592817  |
| Ti | 9.708781848  | 12.990144683 | 0.001862571  |
| Ti | 9.697933083  | 16.318128645 | 1.481817336  |
| Ti | 9.693228670  | 16.343324810 | 4.443888017  |
| Ti | 6.438635445  | 16.249877544 | 2.950253384  |
| Ti | -0.051218475 | 16.652356086 | 5.917756335  |
| Ti | 3.186024181  | 16.325298515 | 1.479866872  |
| Ti | 3.188548554  | 16.329830538 | 4.438472426  |
| Ti | -0.052914423 | 16.650923041 | 2.959614738  |
| Ti | 6.451688150  | 16.249722524 | 5.923166958  |
| Ti | 3.194216217  | 16.330087358 | 7.397647339  |
| Ti | 3.187512437  | 16.329776960 | 10.358302609 |
| Ti | -0.050976104 | 16.655502214 | 8.873378346  |
| Ti | 6.446472237  | 16.563163665 | 0.008343417  |
| Ti | 9.693308031  | 16.340002231 | 7.396361344  |
| Ti | 9.699148056  | 16.321849848 | 10.355363781 |
| Ti | 6.442910319  | 16.286877043 | 8.889417983  |

|    |              |              |              |
|----|--------------|--------------|--------------|
| Ti | -0.052593470 | 16.652039616 | 0.002295061  |
| Ti | 6.414249882  | 19.610746537 | 7.573643396  |
| Ti | 6.425084489  | 19.763905211 | 10.322406279 |
| Ti | 3.249708267  | 19.607596123 | 8.894476083  |
| Ti | 3.206700792  | 19.595063050 | 0.003363155  |
| Ti | 6.430803328  | 19.812805916 | 1.593436947  |
| Ti | 6.269703112  | 19.495707866 | 4.299818868  |
| Ti | 3.185678679  | 19.599125369 | 2.956131157  |
| Ti | 3.145711492  | 19.573759897 | 5.952255944  |
| Ti | -0.036595295 | 20.016824123 | 1.481607242  |
| Ti | -0.080146481 | 20.013043984 | 4.445667544  |
| Ti | 9.730773835  | 19.591948355 | 2.911397880  |
| Ti | 9.644587692  | 19.622453074 | 5.956469056  |
| Ti | -0.060659514 | 20.017694237 | 7.411219794  |
| Ti | -0.057404911 | 20.015051747 | 10.357484829 |
| Ti | 9.643281668  | 19.601406025 | 8.883140842  |
| Ti | 9.654677522  | 19.585257834 | -0.015988178 |
| O  | 0.000000000  | 1.266689833  | 2.957400000  |
| O  | 0.000000000  | 1.266689833  | 0.000000000  |
| O  | 0.000000000  | 1.266689833  | 8.872200000  |
| O  | 0.000000000  | 1.266689833  | 5.914800000  |
| O  | 6.494400000  | 1.266689833  | 2.957400000  |

|   |              |             |              |
|---|--------------|-------------|--------------|
| O | 6.494400000  | 1.266689833 | 0.000000000  |
| O | 6.494400000  | 1.266689833 | 8.872200000  |
| O | 6.494400000  | 1.266689833 | 5.914800000  |
| O | 9.741600000  | 1.980499953 | 8.872200000  |
| O | 9.741600000  | 1.980499953 | 5.914800000  |
| O | 9.741600000  | 1.980499953 | 2.957400000  |
| O | 9.741600000  | 1.980499953 | 0.000000000  |
| O | 3.247200000  | 1.980499953 | 8.872200000  |
| O | 3.247200000  | 1.980499953 | 5.914800000  |
| O | 3.247200000  | 1.980499953 | 2.957400000  |
| O | 3.247200000  | 1.980499953 | 0.000000000  |
| O | 1.266699988  | 3.247190143 | 1.478700000  |
| O | 1.266699988  | 3.247190143 | 4.436100000  |
| O | 5.227599998  | 3.247190143 | 1.478700000  |
| O | 5.227599998  | 3.247190143 | 4.436100000  |
| O | 1.266699988  | 3.247190143 | 7.393500000  |
| O | 1.266699988  | 3.247190143 | 10.350900000 |
| O | 5.227599998  | 3.247190143 | 7.393500000  |
| O | 5.227599998  | 3.247190143 | 10.350900000 |
| O | 7.761099988  | 3.247190143 | 1.478700000  |
| O | 7.761099988  | 3.247190143 | 4.436100000  |
| O | 11.721999998 | 3.247190143 | 1.478700000  |

|   |              |             |              |
|---|--------------|-------------|--------------|
| O | 11.721999998 | 3.247190143 | 4.436100000  |
| O | 7.761099988  | 3.247190143 | 7.393500000  |
| O | 7.761099988  | 3.247190143 | 10.350900000 |
| O | 11.721999998 | 3.247190143 | 7.393500000  |
| O | 11.721999998 | 3.247190143 | 10.350900000 |
| O | 9.741600000  | 4.513899978 | 8.872200000  |
| O | 9.741600000  | 4.513899978 | 5.914800000  |
| O | 9.741600000  | 4.513899978 | 2.957400000  |
| O | 9.741600000  | 4.513899978 | 0.000000000  |
| O | 3.247200000  | 4.513899978 | 8.872200000  |
| O | 3.247200000  | 4.513899978 | 5.914800000  |
| O | 3.247200000  | 4.513899978 | 2.957400000  |
| O | 3.247200000  | 4.513899978 | 0.000000000  |
| O | 0.000000000  | 5.227600085 | 2.957400000  |
| O | 0.000000000  | 5.227600085 | 0.000000000  |
| O | 0.000000000  | 5.227600085 | 8.872200000  |
| O | 0.000000000  | 5.227600085 | 5.914800000  |
| O | 6.494400000  | 5.227600085 | 0.000000000  |
| O | 6.494400000  | 5.227600085 | 2.957400000  |
| O | 6.494400000  | 5.227600085 | 8.872200000  |
| O | 6.494400000  | 5.227600085 | 5.914800000  |
| O | 8.474900012  | 6.494389931 | 7.393500000  |

|   |              |             |              |
|---|--------------|-------------|--------------|
| O | 11.008299988 | 6.494389931 | 7.393500000  |
| O | 8.474900012  | 6.494389931 | 10.350900000 |
| O | 11.008299988 | 6.494389931 | 10.350900000 |
| O | 8.474900012  | 6.494389931 | 1.478700000  |
| O | 11.008299988 | 6.494389931 | 1.478700000  |
| O | 8.474900012  | 6.494389931 | 4.436100000  |
| O | 11.008299988 | 6.494389931 | 4.436100000  |
| O | 1.980500012  | 6.494389931 | 1.478700000  |
| O | 4.513899988  | 6.494389931 | 1.478700000  |
| O | 1.980500012  | 6.494389931 | 4.436100000  |
| O | 4.513899988  | 6.494389931 | 4.436100000  |
| O | 1.980500012  | 6.494389931 | 7.393500000  |
| O | 4.513899988  | 6.494389931 | 7.393500000  |
| O | 1.980500012  | 6.494389931 | 10.350900000 |
| O | 4.513899988  | 6.494389931 | 10.350900000 |
| O | 0.000000000  | 7.761090122 | 8.872200000  |
| O | 0.000000000  | 7.761090122 | 5.914800000  |
| O | 6.494400000  | 7.761090122 | 2.957400000  |
| O | 6.494400000  | 7.761090122 | 0.000000000  |
| O | 0.000000000  | 7.761090122 | 2.957400000  |
| O | 0.000000000  | 7.761090122 | 0.000000000  |
| O | 6.494400000  | 7.761090122 | 8.872200000  |

|   |              |             |              |
|---|--------------|-------------|--------------|
| O | 6.494400000  | 7.761090122 | 5.914800000  |
| O | 3.247200000  | 8.474889884 | 2.957400000  |
| O | 3.247200000  | 8.474889884 | 0.000000000  |
| O | 3.247200000  | 8.474889884 | 8.872200000  |
| O | 3.247200000  | 8.474889884 | 5.914800000  |
| O | 9.741600000  | 8.474889884 | 2.957400000  |
| O | 9.741600000  | 8.474889884 | 0.000000000  |
| O | 9.741600000  | 8.474889884 | 8.872200000  |
| O | 9.741600000  | 8.474889884 | 5.914800000  |
| O | 1.267878982  | 9.790732597 | 1.479510801  |
| O | 1.266765452  | 9.790050722 | 4.435953786  |
| O | 5.208535037  | 9.767150216 | 1.480073535  |
| O | 5.207641668  | 9.767490975 | 4.442156282  |
| O | 1.267798321  | 9.789847481 | 7.392968614  |
| O | 1.269300995  | 9.791689508 | 10.350628156 |
| O | 5.208610243  | 9.766267600 | 7.396194783  |
| O | 5.209567257  | 9.767353100 | 10.355898006 |
| O | 7.760111021  | 9.775386654 | 1.483267882  |
| O | 7.757695624  | 9.776247838 | 4.440762873  |
| O | 11.700624200 | 9.783520222 | 1.477706905  |
| O | 11.698888896 | 9.783435210 | 4.436368650  |
| O | 7.759437422  | 9.774969099 | 7.395321758  |

|   |              |              |              |
|---|--------------|--------------|--------------|
| O | 7.761298197  | 9.775213774  | 10.354047738 |
| O | 11.700270775 | 9.783309480  | 7.394087340  |
| O | 11.701466394 | 9.783397705  | 10.350979140 |
| O | 9.721889366  | 11.075983794 | 2.958765491  |
| O | 9.720904036  | 11.074246066 | 0.000875509  |
| O | 3.240250343  | 11.074078901 | 2.958339034  |
| O | 3.241239699  | 11.074930442 | 0.000840966  |
| O | 3.240851594  | 11.074492527 | 8.872066444  |
| O | 3.239690785  | 11.074719343 | 5.915936825  |
| O | 9.721948075  | 11.075329066 | 8.872607175  |
| O | 9.720942223  | 11.078163723 | 5.916198968  |
| O | 6.461270507  | 11.772452353 | 8.878152891  |
| O | -0.031600971 | 11.805282377 | 2.954501748  |
| O | 6.463770072  | 11.778910701 | 0.002081063  |
| O | 6.461521710  | 11.776582895 | 5.921818738  |
| O | -0.031026087 | 11.805195937 | -0.002959056 |
| O | -0.031146363 | 11.805647782 | 5.911624462  |
| O | 6.459233993  | 11.770401727 | 2.956570154  |
| O | -0.030882690 | 11.805431682 | 8.867482592  |
| O | 8.433452491  | 13.101361424 | 1.485252652  |
| O | 8.428544673  | 13.096702241 | 4.440259169  |
| O | 10.964630084 | 13.120499650 | 1.481474041  |

|   |              |              |              |
|---|--------------|--------------|--------------|
| O | 10.963924922 | 13.124154773 | 4.439537918  |
| O | 1.953660735  | 13.104000342 | 1.481385792  |
| O | 1.954630219  | 13.107093248 | 4.438868008  |
| O | 4.484153428  | 13.116020491 | 1.483120722  |
| O | 4.489434804  | 13.107225408 | 4.439213196  |
| O | 1.954871681  | 13.108631664 | 7.393937932  |
| O | 1.953491101  | 13.102349054 | 10.350860016 |
| O | 4.489236205  | 13.111427388 | 7.394781264  |
| O | 4.484254871  | 13.116470193 | 10.350188686 |
| O | 8.429681713  | 13.099123630 | 7.394128152  |
| O | 8.434978545  | 13.102544436 | 10.349272839 |
| O | 10.964290557 | 13.124714846 | 7.393674605  |
| O | 10.964880768 | 13.119556669 | 10.351940413 |
| O | -0.036384356 | 14.421502201 | 2.964882222  |
| O | -0.034598137 | 14.423442098 | 5.922301386  |
| O | -0.035570348 | 14.422339811 | 8.880128789  |
| O | -0.033660995 | 14.421724016 | 0.007370905  |
| O | 6.454886772  | 14.367486182 | 2.978716939  |
| O | 6.454635178  | 14.392753070 | 5.914640774  |
| O | 6.456212928  | 14.379267014 | 8.861750796  |
| O | 6.461556261  | 14.395635234 | 0.004800807  |
| O | 9.694038521  | 15.132356934 | 8.868883690  |



|   |              |              |              |
|---|--------------|--------------|--------------|
| O | 3.192998777  | 15.132013317 | 8.876907589  |
| O | 9.685342650  | 15.137156135 | 5.917795728  |
| O | 9.691061099  | 15.131482890 | 2.970784601  |
| O | 3.194556394  | 15.126490449 | 2.967359104  |
| O | 9.701829853  | 15.123414689 | 0.003011816  |
| O | 3.177253364  | 15.125570329 | 0.000372514  |
| O | 3.203207324  | 15.127672033 | 5.919164294  |
| O | 1.237959541  | 16.505347148 | 10.352901095 |
| O | 5.167973743  | 16.482740966 | 4.449388190  |
| O | 5.169549024  | 16.463582380 | 7.392606392  |
| O | 7.722886289  | 16.412778926 | 1.485034987  |
| O | 7.714611384  | 16.459974049 | 4.437798612  |
| O | 5.164227123  | 16.410158582 | 10.365933647 |
| O | 11.647398306 | 16.488348845 | 1.482879753  |
| O | 11.645638323 | 16.493470946 | 4.444690301  |
| O | 1.236309573  | 16.495229034 | 4.438123926  |
| O | 1.235078755  | 16.495873404 | 1.484235898  |
| O | 5.160567789  | 16.388434659 | 1.476384238  |
| O | 7.717930542  | 16.447866389 | 7.397164337  |
| O | 7.723965529  | 16.409495995 | 10.366448826 |
| O | 1.237688984  | 16.494306055 | 7.401931193  |
| O | 11.645234112 | 16.497585772 | 7.394980120  |

|   |              |              |              |
|---|--------------|--------------|--------------|
| O | 11.649219206 | 16.487526951 | 10.353815405 |
| O | 3.255442952  | 17.781673602 | 8.886446506  |
| O | 3.245853711  | 17.765456474 | 0.011815759  |
| O | 9.644226214  | 17.777564849 | 2.955592201  |
| O | 9.629308966  | 17.796123356 | 5.916971086  |
| O | 3.234487732  | 17.774531951 | 2.951938865  |
| O | 3.202311357  | 17.755508025 | 5.927582001  |
| O | 9.629017368  | 17.776362905 | 8.880983596  |
| O | 9.639632205  | 17.757984779 | 0.000544398  |
| O | 6.423264239  | 18.508053230 | 0.033463572  |
| O | 6.518904930  | 18.641976165 | 5.952620178  |
| O | -0.057261644 | 18.528895966 | 0.005045916  |
| O | 6.410574052  | 18.361062865 | 2.841626662  |
| O | -0.052202767 | 18.530392948 | 5.922219998  |
| O | 6.467601248  | 18.378492296 | 8.992119258  |
| O | -0.064707474 | 18.532458576 | 8.874662213  |
| O | -0.070582178 | 18.527472922 | 2.962794061  |
| O | 1.974059775  | 19.965993880 | 4.429621283  |
| O | 4.501079783  | 20.102148537 | 1.460972753  |
| O | 4.451731305  | 19.976276658 | 4.486472684  |
| O | 1.985279371  | 19.980998706 | 7.447528267  |
| O | 1.995057729  | 19.956704446 | 10.354827545 |

|   |              |              |              |
|---|--------------|--------------|--------------|
| O | 4.513119231  | 19.992930630 | 7.351644864  |
| O | 4.513933629  | 20.105436468 | 10.424368914 |
| O | 8.395571435  | 20.055051283 | 1.444875980  |
| O | 8.359206562  | 20.180381305 | 4.405803921  |
| O | 10.898586712 | 19.957501694 | 1.458774222  |
| O | 10.850773640 | 19.966849706 | 4.442976192  |
| O | 8.347790316  | 20.086184298 | 7.390625171  |
| O | 8.362557283  | 20.126742479 | 10.398293045 |
| O | 10.863245356 | 19.970574838 | 7.396367850  |
| O | 10.878563957 | 19.959848787 | 10.341499963 |
| O | 1.985911016  | 19.966115681 | 1.485756593  |
| O | -0.055147457 | 21.130144182 | 0.004833693  |
| O | 6.567245477  | 21.008444994 | 3.137277349  |
| O | -0.076791604 | 21.124527373 | 2.964769604  |
| O | -0.068523064 | 21.124208046 | 5.924275273  |
| O | -0.075831732 | 21.134068268 | 8.881919318  |
| O | 6.431547457  | 21.201126713 | 8.843205059  |
| H | 0.000000000  | 0.932899949  | 9.814800036  |
| H | 0.816399984  | 0.932899949  | 8.400899982  |
| H | 6.457700016  | 0.932899949  | 6.856699960  |
| H | 0.834099951  | 0.932899949  | -0.439200043 |
| H | 0.000000000  | 0.932899949  | 3.900000036  |

|   |              |              |              |
|---|--------------|--------------|--------------|
| H | 0.816399984  | 0.932899949  | 2.486099982  |
| H | 6.457700016  | 0.932899949  | 0.941899960  |
| H | 0.834099951  | 0.932899949  | 5.475599957  |
| H | 6.494400000  | 0.932899949  | 9.814800036  |
| H | 7.310799984  | 0.932899949  | 8.400899982  |
| H | -0.036699984 | 0.932899949  | 6.856699960  |
| H | 7.328499951  | 0.932899949  | -0.439200043 |
| H | 6.494400000  | 0.932899949  | 3.900000036  |
| H | 7.310799984  | 0.932899949  | 2.486099982  |
| H | -0.036699984 | 0.932899949  | 0.941899960  |
| H | 7.328499951  | 0.932899949  | 5.475599957  |
| H | 7.735675321  | 20.891104949 | 3.796685988  |
| H | 7.269951506  | 21.695744492 | 8.791070001  |

11-Eb:

|    |             |             |              |
|----|-------------|-------------|--------------|
| Ti | 3.247200000 | 3.247194072 | 1.478700000  |
| Ti | 3.247200000 | 3.247194072 | 4.436100000  |
| Ti | 0.000000000 | 3.247194072 | 2.957400000  |
| Ti | 0.000000000 | 3.247194072 | 0.000000000  |
| Ti | 3.247200000 | 3.247194072 | 7.393500000  |
| Ti | 3.247200000 | 3.247194072 | 10.350900000 |
| Ti | 0.000000000 | 3.247194072 | 8.872200000  |
| Ti | 0.000000000 | 3.247194072 | 5.914800000  |

|    |             |             |              |
|----|-------------|-------------|--------------|
| Ti | 9.741600000 | 3.247194072 | 1.478700000  |
| Ti | 9.741600000 | 3.247194072 | 4.436100000  |
| Ti | 6.494400000 | 3.247194072 | 2.957400000  |
| Ti | 6.494400000 | 3.247194072 | 0.000000000  |
| Ti | 9.741600000 | 3.247194072 | 7.393500000  |
| Ti | 9.741600000 | 3.247194072 | 10.350900000 |
| Ti | 6.494400000 | 3.247194072 | 8.872200000  |
| Ti | 6.494400000 | 3.247194072 | 5.914800000  |
| Ti | 0.000000000 | 6.494391717 | 4.436100000  |
| Ti | 0.000000000 | 6.494391717 | 1.478700000  |
| Ti | 3.247200000 | 6.494391717 | 2.957400000  |
| Ti | 3.247200000 | 6.494391717 | 0.000000000  |
| Ti | 0.000000000 | 6.494391717 | 10.350900000 |
| Ti | 0.000000000 | 6.494391717 | 7.393500000  |
| Ti | 3.247200000 | 6.494391717 | 8.872200000  |
| Ti | 3.247200000 | 6.494391717 | 5.914800000  |
| Ti | 6.494400000 | 6.494391717 | 4.436100000  |
| Ti | 6.494400000 | 6.494391717 | 1.478700000  |
| Ti | 9.741600000 | 6.494391717 | 2.957400000  |
| Ti | 9.741600000 | 6.494391717 | 0.000000000  |
| Ti | 6.494400000 | 6.494391717 | 10.350900000 |
| Ti | 6.494400000 | 6.494391717 | 7.393500000  |

|    |              |              |              |
|----|--------------|--------------|--------------|
| Ti | 9.741600000  | 6.494391717  | 8.872200000  |
| Ti | 9.741600000  | 6.494391717  | 5.914800000  |
| Ti | 3.226140869  | 9.737272008  | 1.479382805  |
| Ti | 3.227395457  | 9.740176675  | 4.436709224  |
| Ti | -0.018050276 | 9.838389566  | 2.962460230  |
| Ti | -0.008943958 | 9.840540206  | 0.001654015  |
| Ti | 3.231644873  | 9.738003176  | 7.393014632  |
| Ti | 3.231838406  | 9.737662417  | 10.351206860 |
| Ti | -0.010610940 | 9.838985359  | 8.872527325  |
| Ti | -0.014628246 | 9.840280172  | 5.916670023  |
| Ti | 9.739037699  | 9.736560844  | 1.484157231  |
| Ti | 9.728766546  | 9.743639273  | 4.438428775  |
| Ti | 6.476142034  | 9.754287813  | 2.962296626  |
| Ti | 6.485944031  | 9.756074119  | 0.010493565  |
| Ti | 9.735367194  | 9.739773408  | 7.391887271  |
| Ti | 9.742630531  | 9.733805125  | 10.351447474 |
| Ti | 6.484810629  | 9.757830064  | 8.889603944  |
| Ti | 6.479784872  | 9.729557424  | 5.927455306  |
| Ti | -0.036500866 | 13.182967492 | 1.517250892  |
| Ti | -0.037292663 | 13.183107511 | 4.474869030  |
| Ti | 3.209216073  | 12.995899367 | 2.958708945  |
| Ti | 3.209720298  | 12.999117289 | 5.916386586  |

|    |              |              |              |
|----|--------------|--------------|--------------|
| Ti | 6.454729867  | 13.101709684 | 1.424615424  |
| Ti | 6.456820154  | 12.986297392 | 4.414861018  |
| Ti | 9.705241102  | 12.999722369 | 2.957750984  |
| Ti | 9.706326576  | 13.002868139 | 5.915522434  |
| Ti | -0.036197707 | 13.182922129 | 7.431971634  |
| Ti | -0.035996251 | 13.185283153 | 10.387819827 |
| Ti | 3.210350125  | 12.995508601 | 8.871825948  |
| Ti | 3.206381657  | 12.995758277 | 0.000094992  |
| Ti | 6.459432462  | 12.999463406 | 7.429071134  |
| Ti | 6.457362956  | 13.117202789 | 10.400338501 |
| Ti | 9.707495827  | 12.992495706 | 8.873825150  |
| Ti | 9.708143449  | 12.988749857 | 0.001404765  |
| Ti | 9.695081132  | 16.312722579 | 1.481465760  |
| Ti | 9.692657682  | 16.331979035 | 4.445319754  |
| Ti | 6.440673258  | 16.257169573 | 2.955279544  |
| Ti | -0.055842618 | 16.643493137 | 5.922489003  |
| Ti | 3.179364693  | 16.322012012 | 1.481837210  |
| Ti | 3.184141194  | 16.326576897 | 4.439721987  |
| Ti | -0.055796118 | 16.645712714 | 2.963925562  |
| Ti | 6.444646921  | 16.249899690 | 5.918789178  |
| Ti | 3.193033846  | 16.328706462 | 7.397269147  |
| Ti | 3.179998676  | 16.323939408 | 10.356807111 |

|    |              |              |              |
|----|--------------|--------------|--------------|
| Ti | -0.054416448 | 16.654222045 | 8.874716511  |
| Ti | 6.438531145  | 16.563227602 | 0.011196953  |
| Ti | 9.683732558  | 16.327953149 | 7.399061923  |
| Ti | 9.694659126  | 16.319847800 | 10.356486883 |
| Ti | 6.438509453  | 16.277550819 | 8.892390643  |
| Ti | -0.054077050 | 16.650053641 | 0.003890755  |
| Ti | 6.419850263  | 19.589140844 | 7.545463396  |
| Ti | 6.411372603  | 19.747413404 | 10.292471121 |
| Ti | 3.253722716  | 19.603339851 | 8.900014938  |
| Ti | 3.193145031  | 19.582616416 | 0.000685289  |
| Ti | 6.428730965  | 19.806990152 | 1.606158972  |
| Ti | 6.280987132  | 19.622767043 | 4.281707868  |
| Ti | 3.184449678  | 19.593885752 | 2.957154181  |
| Ti | 3.149696845  | 19.572352926 | 5.950978939  |
| Ti | -0.026525338 | 20.013174715 | 1.480109142  |
| Ti | -0.076695747 | 20.006132362 | 4.446859376  |
| Ti | 9.744656265  | 19.583595830 | 2.878476103  |
| Ti | 9.719732576  | 19.593714659 | 6.022702750  |
| Ti | -0.031007773 | 20.019694500 | 7.419882019  |
| Ti | -0.068935848 | 20.014527750 | 10.359928587 |
| Ti | 9.627026055  | 19.591325774 | 8.912279513  |
| Ti | 9.641265676  | 19.578105824 | -0.021522419 |



|   |             |             |              |
|---|-------------|-------------|--------------|
| O | 0.000000000 | 1.266694833 | 2.957400000  |
| O | 0.000000000 | 1.266694833 | 0.000000000  |
| O | 0.000000000 | 1.266694833 | 8.872200000  |
| O | 0.000000000 | 1.266694833 | 5.914800000  |
| O | 6.494400000 | 1.266694833 | 2.957400000  |
| O | 6.494400000 | 1.266694833 | 0.000000000  |
| O | 6.494400000 | 1.266694833 | 8.872200000  |
| O | 6.494400000 | 1.266694833 | 5.914800000  |
| O | 9.741600000 | 1.980495667 | 8.872200000  |
| O | 9.741600000 | 1.980495667 | 5.914800000  |
| O | 9.741600000 | 1.980495667 | 2.957400000  |
| O | 9.741600000 | 1.980495667 | 0.000000000  |
| O | 3.247200000 | 1.980495667 | 8.872200000  |
| O | 3.247200000 | 1.980495667 | 5.914800000  |
| O | 3.247200000 | 1.980495667 | 2.957400000  |
| O | 3.247200000 | 1.980495667 | 0.000000000  |
| O | 1.266698949 | 3.247194072 | 1.478700000  |
| O | 1.266698949 | 3.247194072 | 4.436100000  |
| O | 5.227599738 | 3.247194072 | 1.478700000  |
| O | 5.227599738 | 3.247194072 | 4.436100000  |
| O | 1.266698949 | 3.247194072 | 7.393500000  |
| O | 1.266698949 | 3.247194072 | 10.350900000 |

|   |              |             |              |
|---|--------------|-------------|--------------|
| O | 5.227599738  | 3.247194072 | 7.393500000  |
| O | 5.227599738  | 3.247194072 | 10.350900000 |
| O | 7.761098949  | 3.247194072 | 1.478700000  |
| O | 7.761098949  | 3.247194072 | 4.436100000  |
| O | 11.721999738 | 3.247194072 | 1.478700000  |
| O | 11.721999738 | 3.247194072 | 4.436100000  |
| O | 7.761098949  | 3.247194072 | 7.393500000  |
| O | 7.761098949  | 3.247194072 | 10.350900000 |
| O | 11.721999738 | 3.247194072 | 7.393500000  |
| O | 11.721999738 | 3.247194072 | 10.350900000 |
| O | 9.741600000  | 4.513896049 | 8.872200000  |
| O | 9.741600000  | 4.513896049 | 5.914800000  |
| O | 9.741600000  | 4.513896049 | 2.957400000  |
| O | 9.741600000  | 4.513896049 | 0.000000000  |
| O | 3.247200000  | 4.513896049 | 8.872200000  |
| O | 3.247200000  | 4.513896049 | 5.914800000  |
| O | 3.247200000  | 4.513896049 | 2.957400000  |
| O | 3.247200000  | 4.513896049 | 0.000000000  |
| O | 0.000000000  | 5.227596870 | 2.957400000  |
| O | 0.000000000  | 5.227596870 | 0.000000000  |
| O | 0.000000000  | 5.227596870 | 8.872200000  |
| O | 0.000000000  | 5.227596870 | 5.914800000  |

|   |              |             |              |
|---|--------------|-------------|--------------|
| O | 6.494400000  | 5.227596870 | 0.000000000  |
| O | 6.494400000  | 5.227596870 | 2.957400000  |
| O | 6.494400000  | 5.227596870 | 8.872200000  |
| O | 6.494400000  | 5.227596870 | 5.914800000  |
| O | 8.474899752  | 6.494391717 | 7.393500000  |
| O | 11.008298949 | 6.494391717 | 7.393500000  |
| O | 8.474899752  | 6.494391717 | 10.350900000 |
| O | 11.008298949 | 6.494391717 | 10.350900000 |
| O | 8.474899752  | 6.494391717 | 1.478700000  |
| O | 11.008298949 | 6.494391717 | 1.478700000  |
| O | 8.474899752  | 6.494391717 | 4.436100000  |
| O | 11.008298949 | 6.494391717 | 4.436100000  |
| O | 1.980499752  | 6.494391717 | 1.478700000  |
| O | 4.513898949  | 6.494391717 | 1.478700000  |
| O | 1.980499752  | 6.494391717 | 4.436100000  |
| O | 4.513898949  | 6.494391717 | 4.436100000  |
| O | 1.980499752  | 6.494391717 | 7.393500000  |
| O | 4.513898949  | 6.494391717 | 7.393500000  |
| O | 1.980499752  | 6.494391717 | 10.350900000 |
| O | 4.513898949  | 6.494391717 | 10.350900000 |
| O | 0.000000000  | 7.761086550 | 8.872200000  |
| O | 0.000000000  | 7.761086550 | 5.914800000  |

|   |             |             |              |
|---|-------------|-------------|--------------|
| O | 6.494400000 | 7.761086550 | 2.957400000  |
| O | 6.494400000 | 7.761086550 | 0.000000000  |
| O | 0.000000000 | 7.761086550 | 2.957400000  |
| O | 0.000000000 | 7.761086550 | 0.000000000  |
| O | 6.494400000 | 7.761086550 | 8.872200000  |
| O | 6.494400000 | 7.761086550 | 5.914800000  |
| O | 3.247200000 | 8.474887384 | 2.957400000  |
| O | 3.247200000 | 8.474887384 | 0.000000000  |
| O | 3.247200000 | 8.474887384 | 8.872200000  |
| O | 3.247200000 | 8.474887384 | 5.914800000  |
| O | 9.741600000 | 8.474887384 | 2.957400000  |
| O | 9.741600000 | 8.474887384 | 0.000000000  |
| O | 9.741600000 | 8.474887384 | 8.872200000  |
| O | 9.741600000 | 8.474887384 | 5.914800000  |
| O | 1.267724025 | 9.791208016 | 1.480543407  |
| O | 1.266674011 | 9.789751397 | 4.436104495  |
| O | 5.208259805 | 9.767223440 | 1.480932009  |
| O | 5.207751943 | 9.766795526 | 4.442439364  |
| O | 1.268214093 | 9.789817119 | 7.393341128  |
| O | 1.269296319 | 9.791652718 | 10.351004929 |
| O | 5.209168501 | 9.766598000 | 7.396841507  |
| O | 5.209615835 | 9.766860178 | 10.356237397 |

|   |              |              |              |
|---|--------------|--------------|--------------|
| O | 7.759720967  | 9.776423576  | 1.483681799  |
| O | 7.757527029  | 9.776768978  | 4.440999229  |
| O | 11.700535227 | 9.783164461  | 1.477862228  |
| O | 11.699261415 | 9.782443652  | 4.437405278  |
| O | 7.759207910  | 9.776363925  | 7.395635716  |
| O | 7.761270661  | 9.775662762  | 10.355279909 |
| O | 11.700758764 | 9.782687255  | 7.394306306  |
| O | 11.701660187 | 9.782919428  | 10.351325511 |
| O | 9.722891452  | 11.074397515 | 2.959101096  |
| O | 9.721168747  | 11.072591206 | 0.001100271  |
| O | 3.239907698  | 11.073899235 | 2.959094235  |
| O | 3.241351793  | 11.074843287 | 0.001085011  |
| O | 3.241004083  | 11.073917094 | 8.872901732  |
| O | 3.239672601  | 11.074412159 | 5.916105870  |
| O | 9.722533481  | 11.073023406 | 8.872929531  |
| O | 9.721427225  | 11.075547666 | 5.916390253  |
| O | 6.459268543  | 11.772014081 | 8.880270745  |
| O | -0.033269253 | 11.804884110 | 2.955988492  |
| O | 6.462028533  | 11.779225385 | 0.002282640  |
| O | 6.459506108  | 11.777359426 | 5.919303174  |
| O | -0.031768007 | 11.804403333 | -0.002445533 |
| O | -0.032399393 | 11.805170576 | 5.912342637  |

|   |              |              |              |
|---|--------------|--------------|--------------|
| O | 6.456992126  | 11.772143384 | 2.958289468  |
| O | -0.031573435 | 11.804487987 | 8.868921663  |
| O | 8.432170497  | 13.096392915 | 1.485392596  |
| O | 8.427290864  | 13.093672915 | 4.440217647  |
| O | 10.964095335 | 13.118135768 | 1.481207757  |
| O | 10.962876336 | 13.121552288 | 4.439823012  |
| O | 1.952216510  | 13.101297844 | 1.481792376  |
| O | 1.952992981  | 13.104664357 | 4.439644266  |
| O | 4.483320586  | 13.115204312 | 1.484774973  |
| O | 4.488057991  | 13.108736320 | 4.439928059  |
| O | 1.953494998  | 13.105364449 | 7.395165608  |
| O | 1.952502653  | 13.101600027 | 10.352451215 |
| O | 4.487911218  | 13.109399979 | 7.395313123  |
| O | 4.483521133  | 13.116981331 | 10.351246016 |
| O | 8.428332306  | 13.094702336 | 7.395303423  |
| O | 8.433023601  | 13.098590346 | 10.350208442 |
| O | 10.963173130 | 13.121091514 | 7.394644277  |
| O | 10.964266268 | 13.117311017 | 10.353019155 |
| O | -0.038014581 | 14.420173098 | 2.966502286  |
| O | -0.036958332 | 14.422030842 | 5.924545461  |
| O | -0.037865599 | 14.420480638 | 8.881296844  |
| O | -0.036230829 | 14.420806038 | 0.009199643  |

|   |              |              |              |
|---|--------------|--------------|--------------|
| O | 6.455827940  | 14.376419498 | 2.976851648  |
| O | 6.454701941  | 14.393306714 | 5.916985519  |
| O | 6.453766098  | 14.377200315 | 8.860887590  |
| O | 6.459571572  | 14.403706294 | 0.008987420  |
| O | 9.688504643  | 15.124368742 | 8.875151485  |
| O | 3.190664949  | 15.127656317 | 8.875616507  |
| O | 9.681362362  | 15.124495902 | 5.920945477  |
| O | 9.685452145  | 15.122924267 | 2.968068998  |
| O | 3.190928362  | 15.123296816 | 2.966321056  |
| O | 9.694691598  | 15.118691211 | 0.005284046  |
| O | 3.178621864  | 15.122220246 | 0.005095718  |
| O | 3.197963226  | 15.124043343 | 5.921438062  |
| O | 1.233831700  | 16.496529919 | 10.355154752 |
| O | 5.164316097  | 16.468986304 | 4.447885121  |
| O | 5.166051660  | 16.463173755 | 7.390396859  |
| O | 7.719009522  | 16.431782849 | 1.489158076  |
| O | 7.716102369  | 16.457858057 | 4.442562629  |
| O | 5.160250083  | 16.410261095 | 10.367706076 |
| O | 11.642701036 | 16.489489709 | 1.484597174  |
| O | 11.642103421 | 16.482782043 | 4.444885962  |
| O | 1.232589711  | 16.491618917 | 4.442578362  |
| O | 1.232298502  | 16.493099111 | 1.487874446  |

|   |              |              |              |
|---|--------------|--------------|--------------|
| O | 5.160104088  | 16.415316045 | 1.485190192  |
| O | 7.713246651  | 16.453082788 | 7.395368840  |
| O | 7.718464252  | 16.407579315 | 10.367339004 |
| O | 1.234522444  | 16.495375124 | 7.403162417  |
| O | 11.640496187 | 16.492163631 | 7.401227568  |
| O | 11.644856398 | 16.488769972 | 10.358086245 |
| O | 3.251914545  | 17.776875472 | 8.889064869  |
| O | 3.234361221  | 17.755017961 | 0.008186320  |
| O | 9.640043820  | 17.775768899 | 2.964076863  |
| O | 9.643060599  | 17.777363394 | 5.922944798  |
| O | 3.228275968  | 17.771172938 | 2.959770297  |
| O | 3.203238887  | 17.752600858 | 5.926176763  |
| O | 9.622156294  | 17.766282653 | 8.886914248  |
| O | 9.631632793  | 17.751024222 | 0.001901726  |
| O | 6.429707723  | 18.522049353 | 0.010500308  |
| O | 6.511225432  | 18.675078725 | 5.918396198  |
| O | -0.047737477 | 18.527357907 | 0.010029253  |
| O | 6.431810480  | 18.402430795 | 2.891182868  |
| O | -0.070807534 | 18.526077381 | 5.924294437  |
| O | 6.455673893  | 18.369821872 | 8.977797634  |
| O | -0.058138648 | 18.531576675 | 8.880095430  |
| O | -0.077927994 | 18.523300946 | 2.974119365  |



|   |              |              |              |
|---|--------------|--------------|--------------|
| O | 1.960888872  | 19.958699351 | 4.431756762  |
| O | 4.483071851  | 20.049493768 | 1.444533394  |
| O | 4.431110546  | 20.008393374 | 4.489156229  |
| O | 1.992585571  | 19.985865059 | 7.447426769  |
| O | 1.991059387  | 19.954329134 | 10.346819734 |
| O | 4.513218336  | 19.987152371 | 7.349470111  |
| O | 4.509295718  | 20.104783168 | 10.425330069 |
| O | 8.401345736  | 20.055108434 | 1.456375415  |
| O | 8.332809424  | 20.232047015 | 4.528680461  |
| O | 10.910923994 | 19.930643168 | 1.453983944  |
| O | 10.813639051 | 19.987091292 | 4.439452509  |
| O | 8.369824516  | 20.063882800 | 7.390716495  |
| O | 8.346313490  | 20.132218198 | 10.405453738 |
| O | 10.894083365 | 19.968772816 | 7.452812550  |
| O | 10.885587781 | 19.958686135 | 10.354328218 |
| O | 1.979666520  | 19.963903605 | 1.488669750  |
| O | -0.053491385 | 21.130725330 | 0.010252241  |
| O | 6.456468028  | 21.021527783 | 3.039324002  |
| O | -0.088891061 | 21.119335978 | 2.967231699  |
| O | -0.081535114 | 21.119222391 | 5.927501796  |
| O | -0.060727446 | 21.138312754 | 8.887853163  |
| O | 6.436143024  | 21.188069642 | 8.815475412  |

|   |              |              |              |
|---|--------------|--------------|--------------|
| H | 0.000000000  | 0.932897449  | 9.814799089  |
| H | 0.816399334  | 0.932897449  | 8.400899272  |
| H | 6.457698847  | 0.932897449  | 6.856699960  |
| H | 0.834099172  | 0.932897449  | -0.439201108 |
| H | 0.000000000  | 0.932897449  | 3.899999089  |
| H | 0.816399334  | 0.932897449  | 2.486099272  |
| H | 6.457698847  | 0.932897449  | 0.941899960  |
| H | 0.834099172  | 0.932897449  | 5.475598892  |
| H | 6.494400000  | 0.932897449  | 9.814799089  |
| H | 7.310799334  | 0.932897449  | 8.400899272  |
| H | -0.036701153 | 0.932897449  | 6.856699960  |
| H | 7.328499172  | 0.932897449  | -0.439201108 |
| H | 6.494400000  | 0.932897449  | 3.899999089  |
| H | 7.310799334  | 0.932897449  | 2.486099272  |
| H | -0.036701153 | 0.932897449  | 0.941899960  |
| H | 7.328499172  | 0.932897449  | 5.475598892  |
| H | 8.226203848  | 21.176538129 | 4.285370076  |
| H | 7.274202091  | 21.682574549 | 8.775117548  |

TS11-E2:

|    |             |             |             |
|----|-------------|-------------|-------------|
| Ti | 3.247200000 | 3.247190143 | 1.478700000 |
| Ti | 3.247200000 | 3.247190143 | 4.436100000 |
| Ti | 0.000000000 | 3.247190143 | 2.957400000 |

|    |             |             |              |
|----|-------------|-------------|--------------|
| Ti | 0.000000000 | 3.247190143 | 0.000000000  |
| Ti | 3.247200000 | 3.247190143 | 7.393500000  |
| Ti | 3.247200000 | 3.247190143 | 10.350900000 |
| Ti | 0.000000000 | 3.247190143 | 8.872200000  |
| Ti | 0.000000000 | 3.247190143 | 5.914800000  |
| Ti | 9.741600000 | 3.247190143 | 1.478700000  |
| Ti | 9.741600000 | 3.247190143 | 4.436100000  |
| Ti | 6.494400000 | 3.247190143 | 2.957400000  |
| Ti | 6.494400000 | 3.247190143 | 0.000000000  |
| Ti | 9.741600000 | 3.247190143 | 7.393500000  |
| Ti | 9.741600000 | 3.247190143 | 10.350900000 |
| Ti | 6.494400000 | 3.247190143 | 8.872200000  |
| Ti | 6.494400000 | 3.247190143 | 5.914800000  |
| Ti | 0.000000000 | 6.494389931 | 4.436100000  |
| Ti | 0.000000000 | 6.494389931 | 1.478700000  |
| Ti | 3.247200000 | 6.494389931 | 2.957400000  |
| Ti | 3.247200000 | 6.494389931 | 0.000000000  |
| Ti | 0.000000000 | 6.494389931 | 10.350900000 |
| Ti | 0.000000000 | 6.494389931 | 7.393500000  |
| Ti | 3.247200000 | 6.494389931 | 8.872200000  |
| Ti | 3.247200000 | 6.494389931 | 5.914800000  |
| Ti | 6.494400000 | 6.494389931 | 4.436100000  |

|    |              |             |              |
|----|--------------|-------------|--------------|
| Ti | 6.494400000  | 6.494389931 | 1.478700000  |
| Ti | 9.741600000  | 6.494389931 | 2.957400000  |
| Ti | 9.741600000  | 6.494389931 | 0.000000000  |
| Ti | 6.494400000  | 6.494389931 | 10.350900000 |
| Ti | 6.494400000  | 6.494389931 | 7.393500000  |
| Ti | 9.741600000  | 6.494389931 | 8.872200000  |
| Ti | 9.741600000  | 6.494389931 | 5.914800000  |
| Ti | 3.226627689  | 9.738104975 | 1.478798777  |
| Ti | 3.225916682  | 9.738551819 | 4.436676220  |
| Ti | -0.014745795 | 9.840589855 | 2.958607920  |
| Ti | -0.011032427 | 9.843275208 | 0.000225590  |
| Ti | 3.226412724  | 9.738618256 | 7.393674013  |
| Ti | 3.230770986  | 9.738712197 | 10.351054258 |
| Ti | -0.011357537 | 9.839345763 | 8.873020146  |
| Ti | -0.015604485 | 9.840494843 | 5.915030204  |
| Ti | 9.737930274  | 9.739344423 | 1.482382081  |
| Ti | 9.732919975  | 9.745091963 | 4.437128584  |
| Ti | 6.475226193  | 9.750571968 | 2.966203470  |
| Ti | 6.487602571  | 9.733989077 | 0.007783285  |
| Ti | 9.736944424  | 9.738000318 | 7.391971616  |
| Ti | 9.739107449  | 9.737925308 | 10.352956813 |
| Ti | 6.479028794  | 9.750929158 | 8.876020251  |

|    |              |              |              |
|----|--------------|--------------|--------------|
| Ti | 6.482263785  | 9.752704391  | 5.921790347  |
| Ti | -0.033902846 | 13.184451973 | 1.515132802  |
| Ti | -0.034041307 | 13.185674276 | 4.472231857  |
| Ti | 3.210137239  | 12.995876150 | 2.957788129  |
| Ti | 3.209723545  | 12.997245258 | 5.915593766  |
| Ti | 6.457918487  | 13.007809502 | 1.505364273  |
| Ti | 6.458138907  | 13.101497870 | 4.475549942  |
| Ti | 9.707007838  | 13.003252832 | 2.959131972  |
| Ti | 9.712101006  | 13.002631322 | 5.917324673  |
| Ti | -0.033841149 | 13.181884493 | 7.431047624  |
| Ti | -0.033415896 | 13.187319849 | 10.386591204 |
| Ti | 3.210973587  | 12.996426579 | 8.872697435  |
| Ti | 3.210902539  | 12.996295848 | 0.000659973  |
| Ti | 6.461537557  | 13.098291378 | 7.361180586  |
| Ti | 6.458311269  | 13.009220044 | 10.331362706 |
| Ti | 9.709840046  | 12.993517983 | 8.876634089  |
| Ti | 9.708219044  | 12.997580302 | 0.003064931  |
| Ti | 9.696194922  | 16.335705595 | 1.484015394  |
| Ti | 9.704600234  | 16.332474100 | 4.441965116  |
| Ti | 6.453166925  | 16.296243630 | 2.965865972  |
| Ti | -0.054586601 | 16.647261489 | 5.920168036  |
| Ti | 3.194654719  | 16.326813000 | 1.479101142  |

|    |              |              |              |
|----|--------------|--------------|--------------|
| Ti | 3.179271563  | 16.317244958 | 4.437061983  |
| Ti | -0.048865164 | 16.651566697 | 2.956917826  |
| Ti | 6.439331644  | 16.480818214 | 5.913286521  |
| Ti | 3.183142875  | 16.321019382 | 7.396179523  |
| Ti | 3.189641562  | 16.330391326 | 10.352128504 |
| Ti | -0.050329522 | 16.658877299 | 8.876166583  |
| Ti | 6.443661201  | 16.263854736 | -0.000059148 |
| Ti | 9.700688657  | 16.313487679 | 7.395044591  |
| Ti | 9.697331832  | 16.325197430 | 10.354968436 |
| Ti | 6.447645645  | 16.293377182 | 8.863172122  |
| Ti | -0.050686844 | 16.652676485 | 0.001776096  |
| Ti | 6.414291186  | 19.797074922 | 7.289693722  |
| Ti | 6.444844351  | 19.573319124 | 10.188854354 |
| Ti | 3.237437098  | 19.600664142 | 8.894751121  |
| Ti | 3.224593253  | 19.574567503 | 0.002710043  |
| Ti | 6.455030947  | 19.641118023 | 1.696240193  |
| Ti | 6.232464222  | 19.829612050 | 4.409528589  |
| Ti | 3.153354102  | 19.584702761 | 2.929822955  |
| Ti | 3.125807195  | 19.572292561 | 5.938391298  |
| Ti | -0.077845385 | 20.013027910 | 1.491116348  |
| Ti | -0.082049600 | 20.011476635 | 4.445280243  |
| Ti | 9.632842959  | 19.617047721 | 2.950024244  |

|    |              |              |              |
|----|--------------|--------------|--------------|
| Ti | 9.772764677  | 19.565347007 | 5.968220699  |
| Ti | -0.043202178 | 20.027785205 | 7.417296542  |
| Ti | -0.047291182 | 20.019628420 | 10.363843475 |
| Ti | 9.654290715  | 19.583654052 | 8.895520400  |
| Ti | 9.664567714  | 19.584719192 | 0.001041360  |
| O  | 0.000000000  | 1.266689833  | 2.957400000  |
| O  | 0.000000000  | 1.266689833  | 0.000000000  |
| O  | 0.000000000  | 1.266689833  | 8.872200000  |
| O  | 0.000000000  | 1.266689833  | 5.914800000  |
| O  | 6.494400000  | 1.266689833  | 2.957400000  |
| O  | 6.494400000  | 1.266689833  | 0.000000000  |
| O  | 6.494400000  | 1.266689833  | 8.872200000  |
| O  | 6.494400000  | 1.266689833  | 5.914800000  |
| O  | 9.741600000  | 1.980499953  | 8.872200000  |
| O  | 9.741600000  | 1.980499953  | 5.914800000  |
| O  | 9.741600000  | 1.980499953  | 2.957400000  |
| O  | 9.741600000  | 1.980499953  | 0.000000000  |
| O  | 3.247200000  | 1.980499953  | 8.872200000  |
| O  | 3.247200000  | 1.980499953  | 5.914800000  |
| O  | 3.247200000  | 1.980499953  | 2.957400000  |
| O  | 3.247200000  | 1.980499953  | 0.000000000  |
| O  | 1.266699988  | 3.247190143  | 1.478700000  |

|   |              |             |              |
|---|--------------|-------------|--------------|
| O | 1.266699988  | 3.247190143 | 4.436100000  |
| O | 5.227599998  | 3.247190143 | 1.478700000  |
| O | 5.227599998  | 3.247190143 | 4.436100000  |
| O | 1.266699988  | 3.247190143 | 7.393500000  |
| O | 1.266699988  | 3.247190143 | 10.350900000 |
| O | 5.227599998  | 3.247190143 | 7.393500000  |
| O | 5.227599998  | 3.247190143 | 10.350900000 |
| O | 7.761099988  | 3.247190143 | 1.478700000  |
| O | 7.761099988  | 3.247190143 | 4.436100000  |
| O | 11.721999998 | 3.247190143 | 1.478700000  |
| O | 11.721999998 | 3.247190143 | 4.436100000  |
| O | 7.761099988  | 3.247190143 | 7.393500000  |
| O | 7.761099988  | 3.247190143 | 10.350900000 |
| O | 11.721999998 | 3.247190143 | 7.393500000  |
| O | 11.721999998 | 3.247190143 | 10.350900000 |
| O | 9.741600000  | 4.513899978 | 8.872200000  |
| O | 9.741600000  | 4.513899978 | 5.914800000  |
| O | 9.741600000  | 4.513899978 | 2.957400000  |
| O | 9.741600000  | 4.513899978 | 0.000000000  |
| O | 3.247200000  | 4.513899978 | 8.872200000  |
| O | 3.247200000  | 4.513899978 | 5.914800000  |
| O | 3.247200000  | 4.513899978 | 2.957400000  |



|   |              |             |              |
|---|--------------|-------------|--------------|
| O | 3.247200000  | 4.513899978 | 0.000000000  |
| O | 0.000000000  | 5.227600085 | 2.957400000  |
| O | 0.000000000  | 5.227600085 | 0.000000000  |
| O | 0.000000000  | 5.227600085 | 8.872200000  |
| O | 0.000000000  | 5.227600085 | 5.914800000  |
| O | 6.494400000  | 5.227600085 | 0.000000000  |
| O | 6.494400000  | 5.227600085 | 2.957400000  |
| O | 6.494400000  | 5.227600085 | 8.872200000  |
| O | 6.494400000  | 5.227600085 | 5.914800000  |
| O | 8.474900012  | 6.494389931 | 7.393500000  |
| O | 11.008299988 | 6.494389931 | 7.393500000  |
| O | 8.474900012  | 6.494389931 | 10.350900000 |
| O | 11.008299988 | 6.494389931 | 10.350900000 |
| O | 8.474900012  | 6.494389931 | 1.478700000  |
| O | 11.008299988 | 6.494389931 | 1.478700000  |
| O | 8.474900012  | 6.494389931 | 4.436100000  |
| O | 11.008299988 | 6.494389931 | 4.436100000  |
| O | 1.980500012  | 6.494389931 | 1.478700000  |
| O | 4.513899988  | 6.494389931 | 1.478700000  |
| O | 1.980500012  | 6.494389931 | 4.436100000  |
| O | 4.513899988  | 6.494389931 | 4.436100000  |
| O | 1.980500012  | 6.494389931 | 7.393500000  |

|   |             |             |              |
|---|-------------|-------------|--------------|
| O | 4.513899988 | 6.494389931 | 7.393500000  |
| O | 1.980500012 | 6.494389931 | 10.350900000 |
| O | 4.513899988 | 6.494389931 | 10.350900000 |
| O | 0.000000000 | 7.761090122 | 8.872200000  |
| O | 0.000000000 | 7.761090122 | 5.914800000  |
| O | 6.494400000 | 7.761090122 | 2.957400000  |
| O | 6.494400000 | 7.761090122 | 0.000000000  |
| O | 0.000000000 | 7.761090122 | 2.957400000  |
| O | 0.000000000 | 7.761090122 | 0.000000000  |
| O | 6.494400000 | 7.761090122 | 8.872200000  |
| O | 6.494400000 | 7.761090122 | 5.914800000  |
| O | 3.247200000 | 8.474889884 | 2.957400000  |
| O | 3.247200000 | 8.474889884 | 0.000000000  |
| O | 3.247200000 | 8.474889884 | 8.872200000  |
| O | 3.247200000 | 8.474889884 | 5.914800000  |
| O | 9.741600000 | 8.474889884 | 2.957400000  |
| O | 9.741600000 | 8.474889884 | 0.000000000  |
| O | 9.741600000 | 8.474889884 | 8.872200000  |
| O | 9.741600000 | 8.474889884 | 5.914800000  |
| O | 1.268480623 | 9.789388492 | 1.478921450  |
| O | 1.267751172 | 9.789845695 | 4.436243020  |
| O | 5.209691430 | 9.771788325 | 1.479357371  |

|   |              |              |              |
|---|--------------|--------------|--------------|
| O | 5.208580628  | 9.771441136  | 4.439699984  |
| O | 1.268412951  | 9.789628166  | 7.392307458  |
| O | 1.269437248  | 9.789916775  | 10.350596452 |
| O | 5.209222794  | 9.770864632  | 7.395079843  |
| O | 5.210287356  | 9.772057288  | 10.354927387 |
| O | 7.758845392  | 9.779155363  | 1.481807873  |
| O | 7.757819147  | 9.779260734  | 4.438286583  |
| O | 11.700409235 | 9.783337698  | 1.478395861  |
| O | 11.698717444 | 9.785970543  | 4.435610373  |
| O | 7.758647833  | 9.779031775  | 7.395813278  |
| O | 7.759398196  | 9.779271807  | 10.353034533 |
| O | 11.699986450 | 9.783928489  | 7.393715654  |
| O | 11.701119073 | 9.782717259  | 10.350480996 |
| O | 9.719974947  | 11.077592220 | 2.957003235  |
| O | 9.722265132  | 11.075595886 | 0.001204253  |
| O | 3.239861458  | 11.073904236 | 2.957235569  |
| O | 3.241660926  | 11.074047826 | 0.000597395  |
| O | 3.240555579  | 11.074214991 | 8.872989626  |
| O | 3.241617414  | 11.074932585 | 5.915440691  |
| O | 9.721970546  | 11.074601827 | 8.874243800  |
| O | 9.720473067  | 11.076735679 | 5.916201216  |
| O | 6.465607857  | 11.784883628 | 8.868604275  |

|   |              |              |              |
|---|--------------|--------------|--------------|
| O | -0.028092177 | 11.804005066 | 2.953636531  |
| O | 6.463154792  | 11.786302743 | 0.002014463  |
| O | 6.462664595  | 11.791184098 | 5.917112332  |
| O | -0.029011784 | 11.803459637 | -0.002298610 |
| O | -0.029555235 | 11.804038285 | 5.911480023  |
| O | 6.465448354  | 11.785514068 | 2.964564479  |
| O | -0.028692129 | 11.802963501 | 8.869426195  |
| O | 8.430327516  | 13.099639055 | 1.478556507  |
| O | 8.433923205  | 13.105339803 | 4.436683909  |
| O | 10.965878308 | 13.121201528 | 1.481091709  |
| O | 10.966413576 | 13.117975033 | 4.436002524  |
| O | 1.957180700  | 13.106070256 | 1.476777927  |
| O | 1.956015604  | 13.103832820 | 4.437295736  |
| O | 4.492121927  | 13.108917416 | 1.479481108  |
| O | 4.487916933  | 13.114638524 | 4.432951315  |
| O | 1.956061065  | 13.102934130 | 7.394728031  |
| O | 1.956703231  | 13.104120357 | 10.354981094 |
| O | 4.488602612  | 13.116240163 | 7.399928678  |
| O | 4.491751097  | 13.108614876 | 10.351627047 |
| O | 8.433769028  | 13.104220371 | 7.398080421  |
| O | 8.430652236  | 13.096845474 | 10.356755179 |
| O | 10.966596458 | 13.117572480 | 7.398010035  |

|   |              |              |              |
|---|--------------|--------------|--------------|
| O | 10.965933380 | 13.121034363 | 10.354539731 |
| O | -0.032733594 | 14.419105815 | 2.965704379  |
| O | -0.035993913 | 14.419428714 | 5.923128393  |
| O | -0.030560698 | 14.415934684 | 8.880651539  |
| O | -0.034317189 | 14.419521941 | 0.008808557  |
| O | 6.465616819  | 14.391275019 | 2.943466387  |
| O | 6.449573963  | 14.403615567 | 5.915756778  |
| O | 6.467213013  | 14.391242158 | 8.890486551  |
| O | 6.450961166  | 14.403333388 | 0.000059739  |
| O | 9.688443336  | 15.121152963 | 8.884097857  |
| O | 3.190443750  | 15.124428393 | 8.884156650  |
| O | 9.705665965  | 15.116367335 | 5.916584377  |
| O | 9.689251109  | 15.132398368 | 2.956553237  |
| O | 3.194035802  | 15.121546586 | 2.952847378  |
| O | 9.692598063  | 15.130734221 | 0.009700627  |
| O | 3.210349476  | 15.125363516 | -0.000710722 |
| O | 3.188411133  | 15.118582269 | 5.917407362  |
| O | 1.239866816  | 16.492834077 | 10.355970403 |
| O | 5.158540497  | 16.416686939 | 4.426094169  |
| O | 5.159868991  | 16.401182047 | 7.404080158  |
| O | 7.721692229  | 16.463605954 | 1.465687913  |
| O | 7.725977753  | 16.408233686 | 4.451966214  |

|   |              |              |              |
|---|--------------|--------------|--------------|
| O | 5.173164587  | 16.478782589 | 10.350550199 |
| O | 11.648147759 | 16.493371647 | 1.486074691  |
| O | 11.650429502 | 16.485438463 | 4.436297554  |
| O | 1.235000432  | 16.492795143 | 4.443711638  |
| O | 1.239552747  | 16.487459085 | 1.480095420  |
| O | 5.173547107  | 16.478562203 | 1.479507962  |
| O | 7.726483537  | 16.423193507 | 7.385531818  |
| O | 7.722236460  | 16.462010031 | 10.362299831 |
| O | 1.234803132  | 16.488328485 | 7.398155776  |
| O | 11.650875667 | 16.480594256 | 7.404761779  |
| O | 11.652541351 | 16.480879650 | 10.354229559 |
| O | 3.238246041  | 17.773442879 | 8.869641258  |
| O | 3.218481763  | 17.754219642 | 0.001174561  |
| O | 9.625626901  | 17.791317725 | 2.976418330  |
| O | 9.661979825  | 17.742882796 | 5.928048442  |
| O | 3.223219168  | 17.762455008 | 2.962466026  |
| O | 3.217425644  | 17.751077443 | 5.925427121  |
| O | 9.653139128  | 17.758916329 | 8.879550085  |
| O | 9.661635752  | 17.764492418 | 0.001886585  |
| O | 6.473576096  | 18.698581452 | -0.019147509 |
| O | 6.365534478  | 18.460401975 | 5.912119413  |
| O | -0.059977213 | 18.528133366 | 0.004972927  |

|   |              |              |              |
|---|--------------|--------------|--------------|
| O | 6.516344448  | 18.408219769 | 3.061749138  |
| O | -0.075119036 | 18.524976880 | 5.934837095  |
| O | 6.482839448  | 18.426356078 | 8.764067756  |
| O | -0.048029725 | 18.532441431 | 8.882490806  |
| O | -0.056593630 | 18.523726359 | 2.959721204  |
| O | 1.944271001  | 19.920131074 | 4.437179096  |
| O | 4.484598944  | 19.944782524 | 1.467592242  |
| O | 4.367777417  | 20.082851718 | 4.485950171  |
| O | 1.986870758  | 19.981221950 | 7.431665484  |
| O | 2.007753372  | 19.973183038 | 10.344408389 |
| O | 4.487681186  | 20.041686315 | 7.346645202  |
| O | 4.527835542  | 19.994719079 | 10.360443057 |
| O | 8.385234689  | 20.023346408 | 1.453351533  |
| O | 8.412760553  | 20.182178327 | 4.660262521  |
| O | 10.869085770 | 19.951009770 | 1.516732164  |
| O | 10.881313167 | 19.945073634 | 4.419081464  |
| O | 8.417547056  | 20.036491704 | 7.367729216  |
| O | 8.371111057  | 20.054730884 | 10.356790549 |
| O | 10.913956229 | 19.977080335 | 7.460230064  |
| O | 10.882389029 | 19.965639548 | 10.356539525 |
| O | 1.972928710  | 19.963607852 | 1.468327925  |
| O | -0.074126952 | 21.127866026 | 0.013805380  |

|   |              |              |              |
|---|--------------|--------------|--------------|
| O | 6.423185007  | 20.994305638 | 2.965623346  |
| O | -0.064870613 | 21.125979707 | 2.965900514  |
| O | -0.067923111 | 21.124910281 | 5.926019311  |
| O | -0.047161034 | 21.140027979 | 8.892975617  |
| O | 6.436455015  | 21.153296507 | 8.858647892  |
| H | 0.000000000  | 0.932899949  | 9.814800036  |
| H | 0.816399984  | 0.932899949  | 8.400899982  |
| H | 6.457700016  | 0.932899949  | 6.856699960  |
| H | 0.834099951  | 0.932899949  | -0.439200043 |
| H | 0.000000000  | 0.932899949  | 3.900000036  |
| H | 0.816399984  | 0.932899949  | 2.486099982  |
| H | 6.457700016  | 0.932899949  | 0.941899960  |
| H | 0.834099951  | 0.932899949  | 5.475599957  |
| H | 6.494400000  | 0.932899949  | 9.814800036  |
| H | 7.310799984  | 0.932899949  | 8.400899982  |
| H | -0.036699984 | 0.932899949  | 6.856699960  |
| H | 7.328499951  | 0.932899949  | -0.439200043 |
| H | 6.494400000  | 0.932899949  | 3.900000036  |
| H | 7.310799984  | 0.932899949  | 2.486099982  |
| H | -0.036699984 | 0.932899949  | 0.941899960  |
| H | 7.328499951  | 0.932899949  | 5.475599957  |
| H | 7.648326031  | 20.610216295 | 5.420394407  |



|   |             |              |             |
|---|-------------|--------------|-------------|
| H | 7.286276350 | 21.630643090 | 8.871511636 |
|---|-------------|--------------|-------------|

11-Ec:

|    |             |             |              |
|----|-------------|-------------|--------------|
| Ti | 3.247200000 | 3.247194072 | 1.478700000  |
| Ti | 3.247200000 | 3.247194072 | 4.436100000  |
| Ti | 0.000000000 | 3.247194072 | 2.957400000  |
| Ti | 0.000000000 | 3.247194072 | 0.000000000  |
| Ti | 3.247200000 | 3.247194072 | 7.393500000  |
| Ti | 3.247200000 | 3.247194072 | 10.350900000 |
| Ti | 0.000000000 | 3.247194072 | 8.872200000  |
| Ti | 0.000000000 | 3.247194072 | 5.914800000  |
| Ti | 9.741600000 | 3.247194072 | 1.478700000  |
| Ti | 9.741600000 | 3.247194072 | 4.436100000  |
| Ti | 6.494400000 | 3.247194072 | 2.957400000  |
| Ti | 6.494400000 | 3.247194072 | 0.000000000  |
| Ti | 9.741600000 | 3.247194072 | 7.393500000  |
| Ti | 9.741600000 | 3.247194072 | 10.350900000 |
| Ti | 6.494400000 | 3.247194072 | 8.872200000  |
| Ti | 6.494400000 | 3.247194072 | 5.914800000  |
| Ti | 0.000000000 | 6.494391717 | 4.436100000  |
| Ti | 0.000000000 | 6.494391717 | 1.478700000  |
| Ti | 3.247200000 | 6.494391717 | 2.957400000  |
| Ti | 3.247200000 | 6.494391717 | 0.000000000  |

|    |              |             |              |
|----|--------------|-------------|--------------|
| Ti | 0.000000000  | 6.494391717 | 10.350900000 |
| Ti | 0.000000000  | 6.494391717 | 7.393500000  |
| Ti | 3.247200000  | 6.494391717 | 8.872200000  |
| Ti | 3.247200000  | 6.494391717 | 5.914800000  |
| Ti | 6.494400000  | 6.494391717 | 4.436100000  |
| Ti | 6.494400000  | 6.494391717 | 1.478700000  |
| Ti | 9.741600000  | 6.494391717 | 2.957400000  |
| Ti | 9.741600000  | 6.494391717 | 0.000000000  |
| Ti | 6.494400000  | 6.494391717 | 10.350900000 |
| Ti | 6.494400000  | 6.494391717 | 7.393500000  |
| Ti | 9.741600000  | 6.494391717 | 8.872200000  |
| Ti | 9.741600000  | 6.494391717 | 5.914800000  |
| Ti | 3.230490948  | 9.738676836 | 1.478266209  |
| Ti | 3.226000590  | 9.736700505 | 4.436375630  |
| Ti | -0.012564326 | 9.837232629 | 2.958626611  |
| Ti | -0.010479104 | 9.837874856 | 0.001867539  |
| Ti | 3.228725640  | 9.738229277 | 7.394374562  |
| Ti | 3.232879458  | 9.738337505 | 10.351286000 |
| Ti | -0.009882788 | 9.838028090 | 8.875661696  |
| Ti | -0.013328977 | 9.837230843 | 5.917402985  |
| Ti | 9.737548793  | 9.739199047 | 1.481635870  |
| Ti | 9.738425407  | 9.738016392 | 4.439178772  |

|    |              |              |              |
|----|--------------|--------------|--------------|
| Ti | 6.483634233  | 9.754126006  | 2.975120268  |
| Ti | 6.482899587  | 9.731262291  | 0.014245914  |
| Ti | 9.739579073  | 9.736404037  | 7.397804437  |
| Ti | 9.739316959  | 9.739364426  | 10.355275769 |
| Ti | 6.486472286  | 9.749970461  | 8.881688286  |
| Ti | 6.479550425  | 9.753435201  | 5.926728022  |
| Ti | -0.033892066 | 13.180497168 | 1.514154139  |
| Ti | -0.033215089 | 13.177459627 | 4.471192508  |
| Ti | 3.210463257  | 12.994920310 | 2.957703548  |
| Ti | 3.210026704  | 12.994506327 | 5.915918607  |
| Ti | 6.461152699  | 13.005986048 | 1.514946368  |
| Ti | 6.459740556  | 13.113840919 | 4.481372826  |
| Ti | 9.709305947  | 12.996294419 | 2.961900335  |
| Ti | 9.711970599  | 12.994605983 | 5.920965942  |
| Ti | -0.032992851 | 13.178656569 | 7.430022470  |
| Ti | -0.032666312 | 13.179340231 | 10.387464111 |
| Ti | 3.211642381  | 12.995688268 | 8.873133119  |
| Ti | 3.211343638  | 12.997829620 | 0.001302321  |
| Ti | 6.461874746  | 13.088199696 | 7.363677105  |
| Ti | 6.460508714  | 13.001016824 | 10.338900764 |
| Ti | 9.710991503  | 12.995050327 | 8.877807467  |
| Ti | 9.708726516  | 12.998642584 | 0.005213778  |

|    |              |              |              |
|----|--------------|--------------|--------------|
| Ti | 9.689970819  | 16.329660159 | 1.485590742  |
| Ti | 9.700562926  | 16.317277819 | 4.443129740  |
| Ti | 6.432646049  | 16.305908113 | 2.973458327  |
| Ti | -0.058786270 | 16.640353082 | 5.924039154  |
| Ti | 3.185884681  | 16.326721559 | 1.484076790  |
| Ti | 3.168650752  | 16.312931535 | 4.443886361  |
| Ti | -0.058014345 | 16.643502781 | 2.960545254  |
| Ti | 6.440326197  | 16.479040838 | 5.915806936  |
| Ti | 3.178233369  | 16.315195760 | 7.400960101  |
| Ti | 3.186014439  | 16.324617711 | 10.357650088 |
| Ti | -0.055961725 | 16.643083441 | 8.880474805  |
| Ti | 6.445484179  | 16.259612750 | 0.005303801  |
| Ti | 9.695761616  | 16.317597147 | 7.400262509  |
| Ti | 9.694810576  | 16.322184178 | 10.358541448 |
| Ti | 6.440381399  | 16.278962790 | 8.871447164  |
| Ti | -0.054178493 | 16.643307399 | 0.005782072  |
| Ti | 6.404772864  | 19.733108312 | 7.328631087  |
| Ti | 6.408564424  | 19.604845762 | 10.203388673 |
| Ti | 3.193332979  | 19.584316282 | 8.886067367  |
| Ti | 3.190511811  | 19.573984926 | 0.012168636  |
| Ti | 6.418387204  | 19.621630466 | 1.684360908  |
| Ti | 6.415266126  | 19.934288647 | 4.406518784  |

|    |              |              |              |
|----|--------------|--------------|--------------|
| Ti | 3.196566540  | 19.582697141 | 2.968613278  |
| Ti | 3.161414172  | 19.564185783 | 5.923760804  |
| Ti | -0.078597827 | 20.006951399 | 1.490430231  |
| Ti | -0.083221839 | 20.002735131 | 4.445154376  |
| Ti | 9.648797232  | 19.583581543 | 2.969773052  |
| Ti | 9.658169561  | 19.571437092 | 5.928311887  |
| Ti | -0.080875023 | 20.008929158 | 7.406780264  |
| Ti | -0.076950977 | 20.008416948 | 10.361878579 |
| Ti | 9.655826251  | 19.580569719 | 8.887508685  |
| Ti | 9.642473505  | 19.578371573 | 0.011742416  |
| O  | 0.000000000  | 1.266694833  | 2.957400000  |
| O  | 0.000000000  | 1.266694833  | 0.000000000  |
| O  | 0.000000000  | 1.266694833  | 8.872200000  |
| O  | 0.000000000  | 1.266694833  | 5.914800000  |
| O  | 6.494400000  | 1.266694833  | 2.957400000  |
| O  | 6.494400000  | 1.266694833  | 0.000000000  |
| O  | 6.494400000  | 1.266694833  | 8.872200000  |
| O  | 6.494400000  | 1.266694833  | 5.914800000  |
| O  | 9.741600000  | 1.980495667  | 8.872200000  |
| O  | 9.741600000  | 1.980495667  | 5.914800000  |
| O  | 9.741600000  | 1.980495667  | 2.957400000  |
| O  | 9.741600000  | 1.980495667  | 0.000000000  |

|   |              |             |              |
|---|--------------|-------------|--------------|
| O | 3.247200000  | 1.980495667 | 8.872200000  |
| O | 3.247200000  | 1.980495667 | 5.914800000  |
| O | 3.247200000  | 1.980495667 | 2.957400000  |
| O | 3.247200000  | 1.980495667 | 0.000000000  |
| O | 1.266698949  | 3.247194072 | 1.478700000  |
| O | 1.266698949  | 3.247194072 | 4.436100000  |
| O | 5.227599738  | 3.247194072 | 1.478700000  |
| O | 5.227599738  | 3.247194072 | 4.436100000  |
| O | 1.266698949  | 3.247194072 | 7.393500000  |
| O | 1.266698949  | 3.247194072 | 10.350900000 |
| O | 5.227599738  | 3.247194072 | 7.393500000  |
| O | 5.227599738  | 3.247194072 | 10.350900000 |
| O | 7.761098949  | 3.247194072 | 1.478700000  |
| O | 7.761098949  | 3.247194072 | 4.436100000  |
| O | 11.721999738 | 3.247194072 | 1.478700000  |
| O | 11.721999738 | 3.247194072 | 4.436100000  |
| O | 7.761098949  | 3.247194072 | 7.393500000  |
| O | 7.761098949  | 3.247194072 | 10.350900000 |
| O | 11.721999738 | 3.247194072 | 7.393500000  |
| O | 11.721999738 | 3.247194072 | 10.350900000 |
| O | 9.741600000  | 4.513896049 | 8.872200000  |
| O | 9.741600000  | 4.513896049 | 5.914800000  |

|   |              |             |              |
|---|--------------|-------------|--------------|
| O | 9.741600000  | 4.513896049 | 2.957400000  |
| O | 9.741600000  | 4.513896049 | 0.000000000  |
| O | 3.247200000  | 4.513896049 | 8.872200000  |
| O | 3.247200000  | 4.513896049 | 5.914800000  |
| O | 3.247200000  | 4.513896049 | 2.957400000  |
| O | 3.247200000  | 4.513896049 | 0.000000000  |
| O | 0.000000000  | 5.227596870 | 2.957400000  |
| O | 0.000000000  | 5.227596870 | 0.000000000  |
| O | 0.000000000  | 5.227596870 | 8.872200000  |
| O | 0.000000000  | 5.227596870 | 5.914800000  |
| O | 6.494400000  | 5.227596870 | 0.000000000  |
| O | 6.494400000  | 5.227596870 | 2.957400000  |
| O | 6.494400000  | 5.227596870 | 8.872200000  |
| O | 6.494400000  | 5.227596870 | 5.914800000  |
| O | 8.474899752  | 6.494391717 | 7.393500000  |
| O | 11.008298949 | 6.494391717 | 7.393500000  |
| O | 8.474899752  | 6.494391717 | 10.350900000 |
| O | 11.008298949 | 6.494391717 | 10.350900000 |
| O | 8.474899752  | 6.494391717 | 1.478700000  |
| O | 11.008298949 | 6.494391717 | 1.478700000  |
| O | 8.474899752  | 6.494391717 | 4.436100000  |
| O | 11.008298949 | 6.494391717 | 4.436100000  |

|   |             |             |              |
|---|-------------|-------------|--------------|
| O | 1.980499752 | 6.494391717 | 1.478700000  |
| O | 4.513898949 | 6.494391717 | 1.478700000  |
| O | 1.980499752 | 6.494391717 | 4.436100000  |
| O | 4.513898949 | 6.494391717 | 4.436100000  |
| O | 1.980499752 | 6.494391717 | 7.393500000  |
| O | 4.513898949 | 6.494391717 | 7.393500000  |
| O | 1.980499752 | 6.494391717 | 10.350900000 |
| O | 4.513898949 | 6.494391717 | 10.350900000 |
| O | 0.000000000 | 7.761086550 | 8.872200000  |
| O | 0.000000000 | 7.761086550 | 5.914800000  |
| O | 6.494400000 | 7.761086550 | 2.957400000  |
| O | 6.494400000 | 7.761086550 | 0.000000000  |
| O | 0.000000000 | 7.761086550 | 2.957400000  |
| O | 0.000000000 | 7.761086550 | 0.000000000  |
| O | 6.494400000 | 7.761086550 | 8.872200000  |
| O | 6.494400000 | 7.761086550 | 5.914800000  |
| O | 3.247200000 | 8.474887384 | 2.957400000  |
| O | 3.247200000 | 8.474887384 | 0.000000000  |
| O | 3.247200000 | 8.474887384 | 8.872200000  |
| O | 3.247200000 | 8.474887384 | 5.914800000  |
| O | 9.741600000 | 8.474887384 | 2.957400000  |
| O | 9.741600000 | 8.474887384 | 0.000000000  |



|   |              |              |              |
|---|--------------|--------------|--------------|
| O | 9.741600000  | 8.474887384  | 8.872200000  |
| O | 9.741600000  | 8.474887384  | 5.914800000  |
| O | 1.269774697  | 9.788683042  | 1.480302793  |
| O | 1.268882237  | 9.788629106  | 4.437351335  |
| O | 5.211030576  | 9.769909506  | 1.484128603  |
| O | 5.210032646  | 9.767876382  | 4.441587751  |
| O | 1.269740666  | 9.789106312  | 7.394096567  |
| O | 1.270210082  | 9.788242270  | 10.352374441 |
| O | 5.210913806  | 9.769780204  | 7.398706798  |
| O | 5.212052924  | 9.768144989  | 10.357425562 |
| O | 7.760327155  | 9.780236933  | 1.484109558  |
| O | 7.760276109  | 9.777542651  | 4.442147055  |
| O | 11.701601737 | 9.779946895  | 1.479495304  |
| O | 11.701169210 | 9.779627568  | 4.437140532  |
| O | 7.760549523  | 9.779641141  | 7.397081057  |
| O | 7.760829042  | 9.778101653  | 10.357745198 |
| O | 11.701601088 | 9.780184784  | 7.395157918  |
| O | 11.702410550 | 9.778974625  | 10.352043449 |
| O | 9.725149165  | 11.073352020 | 2.960320492  |
| O | 9.725675082  | 11.073669562 | 0.002253421  |
| O | 3.243025530  | 11.072746941 | 2.959730313  |
| O | 3.243306218  | 11.072917678 | 0.001624441  |

|   |              |              |              |
|---|--------------|--------------|--------------|
| O | 3.243695102  | 11.072381179 | 8.874344233  |
| O | 3.244483652  | 11.072973399 | 5.915525509  |
| O | 9.726055783  | 11.072798019 | 8.875405822  |
| O | 9.724819639  | 11.073594195 | 5.916911938  |
| O | 6.461211798  | 11.779131444 | 8.873062023  |
| O | -0.030908019 | 11.800092052 | 2.956354618  |
| O | 6.462636409  | 11.781713569 | 0.007510968  |
| O | 6.463660576  | 11.790514367 | 5.914679220  |
| O | -0.030430680 | 11.800296365 | -0.000682450 |
| O | -0.030929710 | 11.799561983 | 5.913605565  |
| O | 6.461387016  | 11.785802677 | 2.974626855  |
| O | -0.030147135 | 11.799677712 | 8.873041203  |
| O | 8.430555209  | 13.087332440 | 1.483583850  |
| O | 8.433817347  | 13.102233681 | 4.439269741  |
| O | 10.965608141 | 13.120421068 | 1.482405031  |
| O | 10.966704136 | 13.117578553 | 4.440099233  |
| O | 1.956281875  | 13.099489750 | 1.481346282  |
| O | 1.955629577  | 13.096526861 | 4.438455510  |
| O | 4.491901507  | 13.105861657 | 1.481766587  |
| O | 4.488526108  | 13.123185003 | 4.437865804  |
| O | 1.955798691  | 13.094019746 | 7.398032984  |
| O | 1.956836366  | 13.099880515 | 10.355745522 |

|   |              |              |              |
|---|--------------|--------------|--------------|
| O | 4.489175158  | 13.115154663 | 7.399950444  |
| O | 4.492798514  | 13.109283178 | 10.356439565 |
| O | 8.434510819  | 13.094700907 | 7.401650476  |
| O | 8.430482212  | 13.089457004 | 10.357358134 |
| O | 10.967078473 | 13.116504126 | 7.399475249  |
| O | 10.965888439 | 13.121522284 | 10.357702493 |
| O | -0.032660597 | 14.412597103 | 2.967646208  |
| O | -0.031816195 | 14.411728418 | 5.925265292  |
| O | -0.031759434 | 14.411496602 | 8.882307210  |
| O | -0.031352106 | 14.413497579 | 0.010869391  |
| O | 6.458208397  | 14.399969017 | 2.944246904  |
| O | 6.464444450  | 14.416598343 | 5.928636137  |
| O | 6.461818115  | 14.388365351 | 8.890929569  |
| O | 6.462982431  | 14.398627056 | 0.008353354  |
| O | 9.681374311  | 15.118219007 | 8.882932759  |
| O | 3.191077084  | 15.116401625 | 8.883536897  |
| O | 9.688883007  | 15.115856554 | 5.924672156  |
| O | 9.680104267  | 15.120750767 | 2.958483000  |
| O | 3.190918620  | 15.119507033 | 2.956886714  |
| O | 9.673843535  | 15.120982226 | 0.011069785  |
| O | 3.197095704  | 15.119909228 | 0.010027360  |
| O | 3.179159080  | 15.112477896 | 5.924747274  |

|   |              |              |              |
|---|--------------|--------------|--------------|
| O | 1.231751933  | 16.481281489 | 10.358474020 |
| O | 5.154220682  | 16.407924717 | 4.449350808  |
| O | 5.157118223  | 16.423593203 | 7.399173949  |
| O | 7.711278848  | 16.484060068 | 1.483449703  |
| O | 7.719400225  | 16.428023427 | 4.443322562  |
| O | 5.164404550  | 16.450585674 | 10.365051159 |
| O | 11.644088240 | 16.471346613 | 1.484814365  |
| O | 11.645476872 | 16.468451233 | 4.444822082  |
| O | 1.228158971  | 16.483192454 | 4.442643070  |
| O | 1.232399295  | 16.487801987 | 1.487458636  |
| O | 5.164291288  | 16.471463057 | 1.476844172  |
| O | 7.718935876  | 16.439587445 | 7.401775042  |
| O | 7.713729705  | 16.462923365 | 10.360628900 |
| O | 1.229748930  | 16.481844777 | 7.403622589  |
| O | 11.645619100 | 16.467410382 | 7.404106064  |
| O | 11.645835753 | 16.466416323 | 10.359912026 |
| O | 3.216115074  | 17.756290270 | 8.883160834  |
| O | 3.205913021  | 17.751533575 | 0.003440994  |
| O | 9.653971710  | 17.757641162 | 2.972975561  |
| O | 9.654245384  | 17.745200601 | 5.926801129  |
| O | 3.224309838  | 17.756732471 | 2.973110182  |
| O | 3.210518720  | 17.738842980 | 5.922939475  |

|   |              |              |              |
|---|--------------|--------------|--------------|
| O | 9.653120294  | 17.755449089 | 8.884720330  |
| O | 9.662232717  | 17.755289068 | 0.002432876  |
| O | 6.444151658  | 18.692290627 | -0.013006645 |
| O | 6.430313650  | 18.497935116 | 5.901118358  |
| O | -0.070880011 | 18.519319352 | 0.007764595  |
| O | 6.417640868  | 18.441925264 | 3.078294490  |
| O | -0.072734163 | 18.514067234 | 5.932930755  |
| O | 6.421334623  | 18.420436730 | 8.818594286  |
| O | -0.073515569 | 18.518027753 | 8.883476211  |
| O | -0.078934236 | 18.516218230 | 2.964426073  |
| O | 1.956527623  | 19.922608542 | 4.437660206  |
| O | 4.468428278  | 19.958921880 | 1.461077918  |
| O | 4.431501249  | 20.018232165 | 4.490545143  |
| O | 1.972482285  | 19.955409991 | 7.418042161  |
| O | 1.978817573  | 19.956090080 | 10.353937960 |
| O | 4.461346914  | 19.962744525 | 7.387094390  |
| O | 4.481357459  | 19.994918033 | 10.367385967 |
| O | 8.376650520  | 19.958441103 | 1.470837101  |
| O | 8.404690742  | 20.012068856 | 4.484423206  |
| O | 10.863760622 | 19.960153113 | 1.492185744  |
| O | 10.875625241 | 19.941154905 | 4.447165763  |
| O | 8.381525217  | 20.004152460 | 7.398896427  |

|   |              |              |              |
|---|--------------|--------------|--------------|
| O | 8.363582749  | 20.035266544 | 10.362369625 |
| O | 10.868239290 | 19.963347461 | 7.415171354  |
| O | 10.864378629 | 19.964576194 | 10.357794054 |
| O | 1.975571671  | 19.947715409 | 1.496416719  |
| O | -0.069781159 | 21.118140464 | 0.011614774  |
| O | 6.421210970  | 21.025222196 | 2.926786651  |
| O | -0.073619999 | 21.117408225 | 2.968388042  |
| O | -0.070928719 | 21.114890394 | 5.926001803  |
| O | -0.073730014 | 21.120507917 | 8.884721395  |
| O | 6.414936470  | 21.150316830 | 8.878283135  |
| H | 0.000000000  | 0.932897449  | 9.814799089  |
| H | 0.816399334  | 0.932897449  | 8.400899272  |
| H | 6.457698847  | 0.932897449  | 6.856699960  |
| H | 0.834099172  | 0.932897449  | -0.439201108 |
| H | 0.000000000  | 0.932897449  | 3.899999089  |
| H | 0.816399334  | 0.932897449  | 2.486099272  |
| H | 6.457698847  | 0.932897449  | 0.941899960  |
| H | 0.834099172  | 0.932897449  | 5.475598892  |
| H | 6.494400000  | 0.932897449  | 9.814799089  |
| H | 7.310799334  | 0.932897449  | 8.400899272  |
| H | -0.036701153 | 0.932897449  | 6.856699960  |
| H | 7.328499172  | 0.932897449  | -0.439201108 |

|   |              |              |             |
|---|--------------|--------------|-------------|
| H | 6.494400000  | 0.932897449  | 3.899999089 |
| H | 7.310799334  | 0.932897449  | 2.486099272 |
| H | -0.036701153 | 0.932897449  | 0.941899960 |
| H | 7.328499172  | 0.932897449  | 5.475598892 |
| H | 6.419440206  | 20.984161807 | 5.952407836 |
| H | 7.239568755  | 21.666902492 | 8.867168753 |

TS11-E3:

|    |             |             |              |
|----|-------------|-------------|--------------|
| Ti | 3.247200000 | 3.247190143 | 1.478700000  |
| Ti | 3.247200000 | 3.247190143 | 4.436100000  |
| Ti | 0.000000000 | 3.247190143 | 2.957400000  |
| Ti | 0.000000000 | 3.247190143 | 0.000000000  |
| Ti | 3.247200000 | 3.247190143 | 7.393500000  |
| Ti | 3.247200000 | 3.247190143 | 10.350900000 |
| Ti | 0.000000000 | 3.247190143 | 8.872200000  |
| Ti | 0.000000000 | 3.247190143 | 5.914800000  |
| Ti | 9.741600000 | 3.247190143 | 1.478700000  |
| Ti | 9.741600000 | 3.247190143 | 4.436100000  |
| Ti | 6.494400000 | 3.247190143 | 2.957400000  |
| Ti | 6.494400000 | 3.247190143 | 0.000000000  |
| Ti | 9.741600000 | 3.247190143 | 7.393500000  |
| Ti | 9.741600000 | 3.247190143 | 10.350900000 |
| Ti | 6.494400000 | 3.247190143 | 8.872200000  |

|    |              |             |              |
|----|--------------|-------------|--------------|
| Ti | 6.494400000  | 3.247190143 | 5.914800000  |
| Ti | 0.000000000  | 6.494389931 | 4.436100000  |
| Ti | 0.000000000  | 6.494389931 | 1.478700000  |
| Ti | 3.247200000  | 6.494389931 | 2.957400000  |
| Ti | 3.247200000  | 6.494389931 | 0.000000000  |
| Ti | 0.000000000  | 6.494389931 | 10.350900000 |
| Ti | 0.000000000  | 6.494389931 | 7.393500000  |
| Ti | 3.247200000  | 6.494389931 | 8.872200000  |
| Ti | 3.247200000  | 6.494389931 | 5.914800000  |
| Ti | 6.494400000  | 6.494389931 | 4.436100000  |
| Ti | 6.494400000  | 6.494389931 | 1.478700000  |
| Ti | 9.741600000  | 6.494389931 | 2.957400000  |
| Ti | 9.741600000  | 6.494389931 | 0.000000000  |
| Ti | 6.494400000  | 6.494389931 | 10.350900000 |
| Ti | 6.494400000  | 6.494389931 | 7.393500000  |
| Ti | 9.741600000  | 6.494389931 | 8.872200000  |
| Ti | 9.741600000  | 6.494389931 | 5.914800000  |
| Ti | 3.233110399  | 9.738639688 | 1.478277447  |
| Ti | 3.232246774  | 9.737715995 | 4.435973896  |
| Ti | -0.007751716 | 9.838602809 | 2.956770547  |
| Ti | -0.009650029 | 9.839374338 | 0.000005797  |
| Ti | 3.229090106  | 9.737965671 | 7.393921607  |



|    |              |              |              |
|----|--------------|--------------|--------------|
| Ti | 3.232802305  | 9.738796851  | 10.351382056 |
| Ti | -0.010886043 | 9.838180610  | 8.874315014  |
| Ti | -0.009204643 | 9.838295625  | 5.914783084  |
| Ti | 9.740178246  | 9.740453140  | 1.480537255  |
| Ti | 9.741751969  | 9.736800875  | 4.438698017  |
| Ti | 6.487221220  | 9.756495603  | 2.967641594  |
| Ti | 6.483892450  | 9.737456318  | 0.005224898  |
| Ti | 9.741623380  | 9.737552759  | 7.397176285  |
| Ti | 9.737224203  | 9.739262984  | 10.354181768 |
| Ti | 6.483864265  | 9.754417116  | 8.872066680  |
| Ti | 6.483903101  | 9.762550683  | 5.920342996  |
| Ti | -0.034683473 | 13.180786135 | 1.507613672  |
| Ti | -0.034911556 | 13.180049252 | 4.464753539  |
| Ti | 3.211611597  | 12.995958303 | 2.957139157  |
| Ti | 3.210670559  | 12.996120110 | 5.914829337  |
| Ti | 6.460010723  | 12.999041922 | 1.509401834  |
| Ti | 6.460188800  | 13.121487280 | 4.485806796  |
| Ti | 9.707082394  | 12.996241198 | 2.958983037  |
| Ti | 9.710132034  | 12.995141768 | 5.917511936  |
| Ti | -0.034223020 | 13.179617053 | 7.422333230  |
| Ti | -0.034893112 | 13.180553247 | 10.379879326 |
| Ti | 3.211357277  | 12.996152972 | 8.872638760  |

|    |              |              |              |
|----|--------------|--------------|--------------|
| Ti | 3.211402218  | 12.999588065 | 0.000271134  |
| Ti | 6.459210353  | 13.117008835 | 7.346135110  |
| Ti | 6.460253484  | 13.005616357 | 10.316020188 |
| Ti | 9.707613506  | 12.996266915 | 8.873870576  |
| Ti | 9.708174362  | 13.000455679 | 0.002144943  |
| Ti | 9.698300666  | 16.333744981 | 1.479881895  |
| Ti | 9.707712481  | 16.318342245 | 4.439864297  |
| Ti | 6.447298195  | 16.296590461 | 2.964131752  |
| Ti | -0.049051684 | 16.646448882 | 5.916097589  |
| Ti | 3.195895409  | 16.332803786 | 1.476943659  |
| Ti | 3.183603588  | 16.318626211 | 4.436216048  |
| Ti | -0.049276000 | 16.647750125 | 2.955908524  |
| Ti | 6.447207533  | 16.543059955 | 5.908875500  |
| Ti | 3.191491297  | 16.321302991 | 7.395341159  |
| Ti | 3.196163758  | 16.327572028 | 10.350943888 |
| Ti | -0.048270018 | 16.646652838 | 8.873182330  |
| Ti | 6.447913474  | 16.253507663 | -0.001314978 |
| Ti | 9.704263175  | 16.320790780 | 7.398590987  |
| Ti | 9.700773474  | 16.326166129 | 10.354017691 |
| Ti | 6.448802298  | 16.301136058 | 8.867929988  |
| Ti | -0.048331455 | 16.646442810 | 0.000210685  |
| Ti | 6.425879274  | 19.739065165 | 7.363728564  |

|    |              |              |              |
|----|--------------|--------------|--------------|
| Ti | 6.427051773  | 19.733892701 | 10.108011932 |
| Ti | 3.191862127  | 19.583519749 | 8.878979899  |
| Ti | 3.208274385  | 19.576662420 | -0.000046017 |
| Ti | 6.428755644  | 19.655095930 | 1.637762813  |
| Ti | 6.429756821  | 19.886528449 | 4.343109052  |
| Ti | 3.203577375  | 19.593445695 | 2.958730948  |
| Ti | 3.178220640  | 19.571656406 | 5.915458909  |
| Ti | -0.066983631 | 20.008806642 | 1.487325671  |
| Ti | -0.070025738 | 20.010105741 | 4.441209086  |
| Ti | 9.662104777  | 19.592478782 | 2.959224479  |
| Ti | 9.679788639  | 19.571254568 | 5.917062648  |
| Ti | -0.069434618 | 20.014004824 | 7.403508078  |
| Ti | -0.069688029 | 20.008460525 | 10.359033915 |
| Ti | 9.666450830  | 19.581960973 | 8.877204867  |
| Ti | 9.655217726  | 19.578213338 | -0.000698301 |
| O  | 0.000000000  | 1.266689833  | 2.957400000  |
| O  | 0.000000000  | 1.266689833  | 0.000000000  |
| O  | 0.000000000  | 1.266689833  | 8.872200000  |
| O  | 0.000000000  | 1.266689833  | 5.914800000  |
| O  | 6.494400000  | 1.266689833  | 2.957400000  |
| O  | 6.494400000  | 1.266689833  | 0.000000000  |
| O  | 6.494400000  | 1.266689833  | 8.872200000  |

|   |              |             |              |
|---|--------------|-------------|--------------|
| O | 6.494400000  | 1.266689833 | 5.914800000  |
| O | 9.741600000  | 1.980499953 | 8.872200000  |
| O | 9.741600000  | 1.980499953 | 5.914800000  |
| O | 9.741600000  | 1.980499953 | 2.957400000  |
| O | 9.741600000  | 1.980499953 | 0.000000000  |
| O | 3.247200000  | 1.980499953 | 8.872200000  |
| O | 3.247200000  | 1.980499953 | 5.914800000  |
| O | 3.247200000  | 1.980499953 | 2.957400000  |
| O | 3.247200000  | 1.980499953 | 0.000000000  |
| O | 1.266699988  | 3.247190143 | 1.478700000  |
| O | 1.266699988  | 3.247190143 | 4.436100000  |
| O | 5.227599998  | 3.247190143 | 1.478700000  |
| O | 5.227599998  | 3.247190143 | 4.436100000  |
| O | 1.266699988  | 3.247190143 | 7.393500000  |
| O | 1.266699988  | 3.247190143 | 10.350900000 |
| O | 5.227599998  | 3.247190143 | 7.393500000  |
| O | 5.227599998  | 3.247190143 | 10.350900000 |
| O | 7.761099988  | 3.247190143 | 1.478700000  |
| O | 7.761099988  | 3.247190143 | 4.436100000  |
| O | 11.721999998 | 3.247190143 | 1.478700000  |
| O | 11.721999998 | 3.247190143 | 4.436100000  |
| O | 7.761099988  | 3.247190143 | 7.393500000  |

|   |              |             |              |
|---|--------------|-------------|--------------|
| O | 7.761099988  | 3.247190143 | 10.350900000 |
| O | 11.721999998 | 3.247190143 | 7.393500000  |
| O | 11.721999998 | 3.247190143 | 10.350900000 |
| O | 9.741600000  | 4.513899978 | 8.872200000  |
| O | 9.741600000  | 4.513899978 | 5.914800000  |
| O | 9.741600000  | 4.513899978 | 2.957400000  |
| O | 9.741600000  | 4.513899978 | 0.000000000  |
| O | 3.247200000  | 4.513899978 | 8.872200000  |
| O | 3.247200000  | 4.513899978 | 5.914800000  |
| O | 3.247200000  | 4.513899978 | 2.957400000  |
| O | 3.247200000  | 4.513899978 | 0.000000000  |
| O | 0.000000000  | 5.227600085 | 2.957400000  |
| O | 0.000000000  | 5.227600085 | 0.000000000  |
| O | 0.000000000  | 5.227600085 | 8.872200000  |
| O | 0.000000000  | 5.227600085 | 5.914800000  |
| O | 6.494400000  | 5.227600085 | 0.000000000  |
| O | 6.494400000  | 5.227600085 | 2.957400000  |
| O | 6.494400000  | 5.227600085 | 8.872200000  |
| O | 6.494400000  | 5.227600085 | 5.914800000  |
| O | 8.474900012  | 6.494389931 | 7.393500000  |
| O | 11.008299988 | 6.494389931 | 7.393500000  |
| O | 8.474900012  | 6.494389931 | 10.350900000 |

|   |              |             |              |
|---|--------------|-------------|--------------|
| O | 11.008299988 | 6.494389931 | 10.350900000 |
| O | 8.474900012  | 6.494389931 | 1.478700000  |
| O | 11.008299988 | 6.494389931 | 1.478700000  |
| O | 8.474900012  | 6.494389931 | 4.436100000  |
| O | 11.008299988 | 6.494389931 | 4.436100000  |
| O | 1.980500012  | 6.494389931 | 1.478700000  |
| O | 4.513899988  | 6.494389931 | 1.478700000  |
| O | 1.980500012  | 6.494389931 | 4.436100000  |
| O | 4.513899988  | 6.494389931 | 4.436100000  |
| O | 1.980500012  | 6.494389931 | 7.393500000  |
| O | 4.513899988  | 6.494389931 | 7.393500000  |
| O | 1.980500012  | 6.494389931 | 10.350900000 |
| O | 4.513899988  | 6.494389931 | 10.350900000 |
| O | 0.000000000  | 7.761090122 | 8.872200000  |
| O | 0.000000000  | 7.761090122 | 5.914800000  |
| O | 6.494400000  | 7.761090122 | 2.957400000  |
| O | 6.494400000  | 7.761090122 | 0.000000000  |
| O | 0.000000000  | 7.761090122 | 2.957400000  |
| O | 0.000000000  | 7.761090122 | 0.000000000  |
| O | 6.494400000  | 7.761090122 | 8.872200000  |
| O | 6.494400000  | 7.761090122 | 5.914800000  |
| O | 3.247200000  | 8.474889884 | 2.957400000  |

|   |              |             |              |
|---|--------------|-------------|--------------|
| O | 3.247200000  | 8.474889884 | 0.000000000  |
| O | 3.247200000  | 8.474889884 | 8.872200000  |
| O | 3.247200000  | 8.474889884 | 5.914800000  |
| O | 9.741600000  | 8.474889884 | 2.957400000  |
| O | 9.741600000  | 8.474889884 | 0.000000000  |
| O | 9.741600000  | 8.474889884 | 8.872200000  |
| O | 9.741600000  | 8.474889884 | 5.914800000  |
| O | 1.271366215  | 9.788417293 | 1.477782615  |
| O | 1.271635083  | 9.788887355 | 4.435775514  |
| O | 5.212090462  | 9.770922139 | 1.479246173  |
| O | 5.211888096  | 9.769124761 | 4.437274561  |
| O | 1.271165927  | 9.789285978 | 7.392786202  |
| O | 1.270745480  | 9.787786853 | 10.349796535 |
| O | 5.211287104  | 9.770639960 | 7.394449680  |
| O | 5.211659363  | 9.769517669 | 10.353458269 |
| O | 7.761847883  | 9.779936537 | 1.478378945  |
| O | 7.762259758  | 9.777486215 | 4.438092933  |
| O | 11.703243911 | 9.780738785 | 1.478239000  |
| O | 11.703268200 | 9.780556618 | 4.435307772  |
| O | 7.761701500  | 9.779470404 | 7.394362496  |
| O | 7.761181168  | 9.777896983 | 10.353311937 |
| O | 11.702606291 | 9.781157769 | 7.392367552  |

|   |              |              |              |
|---|--------------|--------------|--------------|
| O | 11.702765923 | 9.780045123  | 10.350178158 |
| O | 9.725156439  | 11.074106405 | 2.958160525  |
| O | 9.725915115  | 11.074612543 | -0.000026262 |
| O | 3.243239975  | 11.073819582 | 2.957505165  |
| O | 3.242667818  | 11.074084974 | -0.000386946 |
| O | 3.243550147  | 11.073448104 | 8.872947986  |
| O | 3.245556787  | 11.074232136 | 5.914024097  |
| O | 9.725191769  | 11.073515970 | 8.873446722  |
| O | 9.724131882  | 11.074014250 | 5.914628353  |
| O | 6.464724229  | 11.779568644 | 8.869442402  |
| O | -0.027218420 | 11.799713074 | 2.953241068  |
| O | 6.464965431  | 11.785041863 | -0.002172624 |
| O | 6.465005436  | 11.788768423 | 5.911137556  |
| O | -0.027589250 | 11.799932031 | -0.004523048 |
| O | -0.027705890 | 11.799628420 | 5.910154634  |
| O | 6.465117010  | 11.781214932 | 2.964452689  |
| O | -0.027754987 | 11.799756651 | 8.869201788  |
| O | 8.432155819  | 13.091729088 | 1.478415025  |
| O | 8.436081424  | 13.102965563 | 4.433754900  |
| O | 10.966827529 | 13.118986594 | 1.478912815  |
| O | 10.967130298 | 13.118339724 | 4.435871570  |
| O | 1.958245262  | 13.102898769 | 1.477861873  |



|   |              |              |              |
|---|--------------|--------------|--------------|
| O | 1.957995097  | 13.102005080 | 4.435322677  |
| O | 4.493556020  | 13.107688326 | 1.477835138  |
| O | 4.489639508  | 13.120703963 | 4.432527343  |
| O | 1.957858845  | 13.099207213 | 7.393717073  |
| O | 1.958345016  | 13.103699231 | 10.352153938 |
| O | 4.489201785  | 13.115204669 | 7.396458583  |
| O | 4.493859179  | 13.113139756 | 10.352554370 |
| O | 8.436196895  | 13.097672725 | 7.397263114  |
| O | 8.431938647  | 13.096371840 | 10.353517536 |
| O | 10.967524378 | 13.115830109 | 7.394864308  |
| O | 10.966616071 | 13.120049948 | 10.352991710 |
| O | -0.029623296 | 14.411767709 | 2.962415159  |
| O | -0.029825402 | 14.411468741 | 5.920383571  |
| O | -0.029721751 | 14.411283002 | 8.876974427  |
| O | -0.029654470 | 14.412721048 | 0.006062788  |
| O | 6.465679685  | 14.400086533 | 2.936938341  |
| O | 6.465242742  | 14.423089909 | 5.917618284  |
| O | 6.464932569  | 14.398353448 | 8.882542619  |
| O | 6.464682015  | 14.404797151 | 0.004649979  |
| O | 9.686297326  | 15.119053045 | 8.876658813  |
| O | 3.202659586  | 15.119853150 | 8.875090208  |
| O | 9.693716919  | 15.118514760 | 5.917796793  |

|   |              |              |              |
|---|--------------|--------------|--------------|
| O | 9.683679953  | 15.125179206 | 2.950903539  |
| O | 3.203285776  | 15.124611274 | 2.949059777  |
| O | 9.680349106  | 15.123269312 | 0.007523507  |
| O | 3.208047341  | 15.123235379 | 0.005283691  |
| O | 3.193693937  | 15.119010539 | 5.915861825  |
| O | 1.240527167  | 16.483349617 | 10.352611152 |
| O | 5.166762017  | 16.420176325 | 4.433926074  |
| O | 5.167072969  | 16.436479180 | 7.390819294  |
| O | 7.717733243  | 16.500691179 | 1.470693490  |
| O | 7.727859571  | 16.439653882 | 4.433716927  |
| O | 5.173378382  | 16.457359777 | 10.359468061 |
| O | 11.652516802 | 16.472085639 | 1.480587413  |
| O | 11.655178857 | 16.467935094 | 4.435866602  |
| O | 1.238197885  | 16.482330198 | 4.435445468  |
| O | 1.242388332  | 16.489233247 | 1.480546009  |
| O | 5.176279691  | 16.484565848 | 1.470440455  |
| O | 7.727359502  | 16.452745958 | 7.391628321  |
| O | 7.721678071  | 16.471728806 | 10.358902843 |
| O | 1.238782901  | 16.483745741 | 7.394905120  |
| O | 11.655129759 | 16.468696623 | 7.395045892  |
| O | 11.654470707 | 16.467350375 | 10.352728974 |
| O | 3.226351937  | 17.754599691 | 8.875332951  |

|   |              |              |              |
|---|--------------|--------------|--------------|
| O | 3.222772613  | 17.753341312 | -0.003222265 |
| O | 9.661576263  | 17.765272878 | 2.966433201  |
| O | 9.677270370  | 17.744694463 | 5.912118230  |
| O | 3.237424239  | 17.765680074 | 2.965628788  |
| O | 3.218266539  | 17.744997717 | 5.910578134  |
| O | 9.671044579  | 17.753273446 | 8.876447181  |
| O | 9.677002801  | 17.754630053 | -0.003293361 |
| O | 6.427537554  | 18.824589420 | -0.042799493 |
| O | 6.429690708  | 18.511779433 | 5.876508413  |
| O | -0.066666055 | 18.516728654 | 0.003280348  |
| O | 6.429774875  | 18.452950640 | 3.051037554  |
| O | -0.064964263 | 18.517910238 | 5.918795093  |
| O | 6.428414558  | 18.421048596 | 8.822435594  |
| O | -0.065807106 | 18.517779864 | 8.869783568  |
| O | -0.065743071 | 18.517329805 | 2.959501647  |
| O | 1.972530863  | 19.936868628 | 4.427298541  |
| O | 4.457718492  | 19.991732258 | 1.466603997  |
| O | 4.454587802  | 20.045521104 | 4.493305580  |
| O | 1.976985372  | 19.957843167 | 7.402946527  |
| O | 1.971996504  | 19.931332902 | 10.351778348 |
| O | 4.456902276  | 19.956025071 | 7.371197655  |
| O | 4.445577601  | 20.014246999 | 10.350843336 |

|   |              |              |              |
|---|--------------|--------------|--------------|
| O | 8.405765305  | 19.975699439 | 1.466930968  |
| O | 8.408600241  | 20.035052587 | 4.492999075  |
| O | 10.879582279 | 19.955746463 | 1.490423843  |
| O | 10.888131767 | 19.952769287 | 4.428954330  |
| O | 8.404515653  | 19.940750924 | 7.372258415  |
| O | 8.414348694  | 19.999248602 | 10.351547671 |
| O | 10.881810248 | 19.972661183 | 7.403172236  |
| O | 10.886496087 | 19.950707230 | 10.349896968 |
| O | 1.981797593  | 19.938817098 | 1.489957284  |
| O | -0.058355561 | 21.118205829 | 0.006719686  |
| O | 6.435955596  | 21.045669166 | 2.908319226  |
| O | -0.058777957 | 21.121234441 | 2.961220961  |
| O | -0.059807059 | 21.119469924 | 5.918942844  |
| O | -0.058964086 | 21.121890241 | 8.880397795  |
| O | 6.437382155  | 21.162028724 | 8.904677930  |
| H | 0.000000000  | 0.932899949  | 9.814800036  |
| H | 0.816399984  | 0.932899949  | 8.400899982  |
| H | 6.457700016  | 0.932899949  | 6.856699960  |
| H | 0.834099951  | 0.932899949  | -0.439200043 |
| H | 0.000000000  | 0.932899949  | 3.900000036  |
| H | 0.816399984  | 0.932899949  | 2.486099982  |
| H | 6.457700016  | 0.932899949  | 0.941899960  |

|   |              |              |              |
|---|--------------|--------------|--------------|
| H | 0.834099951  | 0.932899949  | 5.475599957  |
| H | 6.494400000  | 0.932899949  | 9.814800036  |
| H | 7.310799984  | 0.932899949  | 8.400899982  |
| H | -0.036699984 | 0.932899949  | 6.856699960  |
| H | 7.328499951  | 0.932899949  | -0.439200043 |
| H | 6.494400000  | 0.932899949  | 3.900000036  |
| H | 7.310799984  | 0.932899949  | 2.486099982  |
| H | -0.036699984 | 0.932899949  | 0.941899960  |
| H | 7.328499951  | 0.932899949  | 5.475599957  |
| H | 6.439147723  | 21.508326678 | 6.689563682  |
| H | 6.439633634  | 21.603861003 | 7.685351965  |

TS11-F1:

|    |             |             |              |
|----|-------------|-------------|--------------|
| Ti | 3.247200000 | 3.247190143 | 1.478700000  |
| Ti | 3.247200000 | 3.247190143 | 4.436100000  |
| Ti | 0.000000000 | 3.247190143 | 2.957400000  |
| Ti | 0.000000000 | 3.247190143 | 0.000000000  |
| Ti | 3.247200000 | 3.247190143 | 7.393500000  |
| Ti | 3.247200000 | 3.247190143 | 10.350900000 |
| Ti | 0.000000000 | 3.247190143 | 8.872200000  |
| Ti | 0.000000000 | 3.247190143 | 5.914800000  |
| Ti | 9.741600000 | 3.247190143 | 1.478700000  |
| Ti | 9.741600000 | 3.247190143 | 4.436100000  |

|    |             |             |              |
|----|-------------|-------------|--------------|
| Ti | 6.494400000 | 3.247190143 | 2.957400000  |
| Ti | 6.494400000 | 3.247190143 | 0.000000000  |
| Ti | 9.741600000 | 3.247190143 | 7.393500000  |
| Ti | 9.741600000 | 3.247190143 | 10.350900000 |
| Ti | 6.494400000 | 3.247190143 | 8.872200000  |
| Ti | 6.494400000 | 3.247190143 | 5.914800000  |
| Ti | 0.000000000 | 6.494389931 | 4.436100000  |
| Ti | 0.000000000 | 6.494389931 | 1.478700000  |
| Ti | 3.247200000 | 6.494389931 | 2.957400000  |
| Ti | 3.247200000 | 6.494389931 | 0.000000000  |
| Ti | 0.000000000 | 6.494389931 | 10.350900000 |
| Ti | 0.000000000 | 6.494389931 | 7.393500000  |
| Ti | 3.247200000 | 6.494389931 | 8.872200000  |
| Ti | 3.247200000 | 6.494389931 | 5.914800000  |
| Ti | 6.494400000 | 6.494389931 | 4.436100000  |
| Ti | 6.494400000 | 6.494389931 | 1.478700000  |
| Ti | 9.741600000 | 6.494389931 | 2.957400000  |
| Ti | 9.741600000 | 6.494389931 | 0.000000000  |
| Ti | 6.494400000 | 6.494389931 | 10.350900000 |
| Ti | 6.494400000 | 6.494389931 | 7.393500000  |
| Ti | 9.741600000 | 6.494389931 | 8.872200000  |
| Ti | 9.741600000 | 6.494389931 | 5.914800000  |

|    |              |              |              |
|----|--------------|--------------|--------------|
| Ti | 3.230376646  | 9.739347281  | 1.478691364  |
| Ti | 3.227138928  | 9.739170472  | 4.436552837  |
| Ti | -0.011968660 | 9.837320140  | 2.957585370  |
| Ti | -0.008151771 | 9.838219544  | -0.000180875 |
| Ti | 3.229995295  | 9.739468011  | 7.393506388  |
| Ti | 3.232470571  | 9.739083675  | 10.351278311 |
| Ti | -0.010953845 | 9.837510522  | 8.872531229  |
| Ti | -0.012179728 | 9.837326927  | 5.916354173  |
| Ti | 9.740908866  | 9.740625663  | 1.481660239  |
| Ti | 9.739657785  | 9.740608161  | 4.438594153  |
| Ti | 6.485227180  | 9.743544975  | 2.969476011  |
| Ti | 6.484037535  | 9.737948883  | 0.013390279  |
| Ti | 9.737006251  | 9.739208334  | 7.396249554  |
| Ti | 9.740681302  | 9.739814128  | 10.354629636 |
| Ti | 6.485517219  | 9.736817306  | 8.883690209  |
| Ti | 6.479716032  | 9.741499706  | 5.924070148  |
| Ti | -0.033724900 | 13.181470510 | 1.514375589  |
| Ti | -0.033241716 | 13.178835164 | 4.472107410  |
| Ti | 3.211121919  | 12.996836633 | 2.957774289  |
| Ti | 3.210991512  | 12.999882033 | 5.914858438  |
| Ti | 6.460851228  | 13.054467054 | 1.490353457  |
| Ti | 6.462609003  | 13.061798374 | 4.433781044  |

|    |              |              |              |
|----|--------------|--------------|--------------|
| Ti | 9.710753938  | 13.000644990 | 2.961823561  |
| Ti | 9.710786670  | 12.999355892 | 5.919640199  |
| Ti | -0.033126636 | 13.180839713 | 7.429708986  |
| Ti | -0.033536692 | 13.179967813 | 10.386141088 |
| Ti | 3.210733035  | 12.998010001 | 8.872136238  |
| Ti | 3.210652374  | 12.999631643 | 0.000154495  |
| Ti | 6.459752506  | 13.024558129 | 7.391423195  |
| Ti | 6.458559744  | 13.024823878 | 10.364468315 |
| Ti | 9.709866673  | 12.998399338 | 8.876169186  |
| Ti | 9.708834973  | 13.000378169 | 0.003211973  |
| Ti | 9.700042854  | 16.324829168 | 1.482673326  |
| Ti | 9.696358711  | 16.328464645 | 4.436689587  |
| Ti | 6.434517995  | 16.329217958 | 2.952001917  |
| Ti | -0.052988849 | 16.644462193 | 5.918097264  |
| Ti | 3.178844232  | 16.322582444 | 1.479591360  |
| Ti | 3.181535511  | 16.327760981 | 4.436648065  |
| Ti | -0.055812874 | 16.643865686 | 2.961335826  |
| Ti | 6.447447566  | 16.309104604 | 5.916402793  |
| Ti | 3.183656063  | 16.330064498 | 7.393519637  |
| Ti | 3.182191186  | 16.327571313 | 10.352315412 |
| Ti | -0.052451892 | 16.647225413 | 8.874957125  |
| Ti | 6.447432499  | 16.315294702 | 0.001360877  |



|    |              |              |              |
|----|--------------|--------------|--------------|
| Ti | 9.700956226  | 16.326920156 | 7.394330438  |
| Ti | 9.701346540  | 16.325745717 | 10.356996029 |
| Ti | 6.440469723  | 16.253664827 | 8.871700199  |
| Ti | -0.053144974 | 16.645062986 | 0.002685674  |
| Ti | 6.403324742  | 19.696492077 | 7.503147025  |
| Ti | 6.408386478  | 19.600973826 | 10.305998151 |
| Ti | 3.201686336  | 19.603228407 | 8.874563436  |
| Ti | 3.180394445  | 19.573363773 | 0.004388545  |
| Ti | 6.421461913  | 19.784798311 | 1.715806114  |
| Ti | 6.421583229  | 19.672222463 | 4.376106065  |
| Ti | 3.203593741  | 19.582967534 | 2.951501761  |
| Ti | 3.175507929  | 19.579637097 | 5.907407801  |
| Ti | -0.075994611 | 20.007108562 | 1.484934554  |
| Ti | -0.076996048 | 20.005466918 | 4.441195482  |
| Ti | 9.655308388  | 19.582161356 | 2.954576866  |
| Ti | 9.655054846  | 19.580896190 | 5.913040938  |
| Ti | -0.076213992 | 20.009056318 | 7.401394247  |
| Ti | -0.076578458 | 20.010808691 | 10.353015961 |
| Ti | 9.649433034  | 19.593622861 | 8.874149991  |
| Ti | 9.654554648  | 19.577997238 | 0.003211855  |
| O  | 0.000000000  | 1.266689833  | 2.957400000  |
| O  | 0.000000000  | 1.266689833  | 0.000000000  |

|   |             |             |              |
|---|-------------|-------------|--------------|
| O | 0.000000000 | 1.266689833 | 8.872200000  |
| O | 0.000000000 | 1.266689833 | 5.914800000  |
| O | 6.494400000 | 1.266689833 | 2.957400000  |
| O | 6.494400000 | 1.266689833 | 0.000000000  |
| O | 6.494400000 | 1.266689833 | 8.872200000  |
| O | 6.494400000 | 1.266689833 | 5.914800000  |
| O | 9.741600000 | 1.980499953 | 8.872200000  |
| O | 9.741600000 | 1.980499953 | 5.914800000  |
| O | 9.741600000 | 1.980499953 | 2.957400000  |
| O | 9.741600000 | 1.980499953 | 0.000000000  |
| O | 3.247200000 | 1.980499953 | 8.872200000  |
| O | 3.247200000 | 1.980499953 | 5.914800000  |
| O | 3.247200000 | 1.980499953 | 2.957400000  |
| O | 3.247200000 | 1.980499953 | 0.000000000  |
| O | 1.266699988 | 3.247190143 | 1.478700000  |
| O | 1.266699988 | 3.247190143 | 4.436100000  |
| O | 5.227599998 | 3.247190143 | 1.478700000  |
| O | 5.227599998 | 3.247190143 | 4.436100000  |
| O | 1.266699988 | 3.247190143 | 7.393500000  |
| O | 1.266699988 | 3.247190143 | 10.350900000 |
| O | 5.227599998 | 3.247190143 | 7.393500000  |
| O | 5.227599998 | 3.247190143 | 10.350900000 |

|   |              |             |              |
|---|--------------|-------------|--------------|
| O | 7.761099988  | 3.247190143 | 1.478700000  |
| O | 7.761099988  | 3.247190143 | 4.436100000  |
| O | 11.721999998 | 3.247190143 | 1.478700000  |
| O | 11.721999998 | 3.247190143 | 4.436100000  |
| O | 7.761099988  | 3.247190143 | 7.393500000  |
| O | 7.761099988  | 3.247190143 | 10.350900000 |
| O | 11.721999998 | 3.247190143 | 7.393500000  |
| O | 11.721999998 | 3.247190143 | 10.350900000 |
| O | 9.741600000  | 4.513899978 | 8.872200000  |
| O | 9.741600000  | 4.513899978 | 5.914800000  |
| O | 9.741600000  | 4.513899978 | 2.957400000  |
| O | 9.741600000  | 4.513899978 | 0.000000000  |
| O | 3.247200000  | 4.513899978 | 8.872200000  |
| O | 3.247200000  | 4.513899978 | 5.914800000  |
| O | 3.247200000  | 4.513899978 | 2.957400000  |
| O | 3.247200000  | 4.513899978 | 0.000000000  |
| O | 0.000000000  | 5.227600085 | 2.957400000  |
| O | 0.000000000  | 5.227600085 | 0.000000000  |
| O | 0.000000000  | 5.227600085 | 8.872200000  |
| O | 0.000000000  | 5.227600085 | 5.914800000  |
| O | 6.494400000  | 5.227600085 | 0.000000000  |
| O | 6.494400000  | 5.227600085 | 2.957400000  |

|   |              |             |              |
|---|--------------|-------------|--------------|
| O | 6.494400000  | 5.227600085 | 8.872200000  |
| O | 6.494400000  | 5.227600085 | 5.914800000  |
| O | 8.474900012  | 6.494389931 | 7.393500000  |
| O | 11.008299988 | 6.494389931 | 7.393500000  |
| O | 8.474900012  | 6.494389931 | 10.350900000 |
| O | 11.008299988 | 6.494389931 | 10.350900000 |
| O | 8.474900012  | 6.494389931 | 1.478700000  |
| O | 11.008299988 | 6.494389931 | 1.478700000  |
| O | 8.474900012  | 6.494389931 | 4.436100000  |
| O | 11.008299988 | 6.494389931 | 4.436100000  |
| O | 1.980500012  | 6.494389931 | 1.478700000  |
| O | 4.513899988  | 6.494389931 | 1.478700000  |
| O | 1.980500012  | 6.494389931 | 4.436100000  |
| O | 4.513899988  | 6.494389931 | 4.436100000  |
| O | 1.980500012  | 6.494389931 | 7.393500000  |
| O | 4.513899988  | 6.494389931 | 7.393500000  |
| O | 1.980500012  | 6.494389931 | 10.350900000 |
| O | 4.513899988  | 6.494389931 | 10.350900000 |
| O | 0.000000000  | 7.761090122 | 8.872200000  |
| O | 0.000000000  | 7.761090122 | 5.914800000  |
| O | 6.494400000  | 7.761090122 | 2.957400000  |
| O | 6.494400000  | 7.761090122 | 0.000000000  |

|   |             |             |              |
|---|-------------|-------------|--------------|
| O | 0.000000000 | 7.761090122 | 2.957400000  |
| O | 0.000000000 | 7.761090122 | 0.000000000  |
| O | 6.494400000 | 7.761090122 | 8.872200000  |
| O | 6.494400000 | 7.761090122 | 5.914800000  |
| O | 3.247200000 | 8.474889884 | 2.957400000  |
| O | 3.247200000 | 8.474889884 | 0.000000000  |
| O | 3.247200000 | 8.474889884 | 8.872200000  |
| O | 3.247200000 | 8.474889884 | 5.914800000  |
| O | 9.741600000 | 8.474889884 | 2.957400000  |
| O | 9.741600000 | 8.474889884 | 0.000000000  |
| O | 9.741600000 | 8.474889884 | 8.872200000  |
| O | 9.741600000 | 8.474889884 | 5.914800000  |
| O | 1.270497394 | 9.790028933 | 1.479043295  |
| O | 1.269793531 | 9.790253248 | 4.435619245  |
| O | 5.211732230 | 9.772506276 | 1.484165985  |
| O | 5.210947577 | 9.772277674 | 4.438988907  |
| O | 1.270164751 | 9.790117873 | 7.392817905  |
| O | 1.270935506 | 9.790013931 | 10.350249372 |
| O | 5.211167088 | 9.771232894 | 7.397006412  |
| O | 5.211937324 | 9.772294462 | 10.356441813 |
| O | 7.760634080 | 9.781731773 | 1.483688187  |
| O | 7.760098812 | 9.781639618 | 4.440297024  |

|   |              |              |              |
|---|--------------|--------------|--------------|
| O | 11.702595770 | 9.781926798  | 1.477997677  |
| O | 11.701905415 | 9.781784637  | 4.435639119  |
| O | 7.759732397  | 9.781433876  | 7.395868759  |
| O | 7.760472110  | 9.781572466  | 10.356206640 |
| O | 11.701964125 | 9.781352794  | 7.393153038  |
| O | 11.702703187 | 9.781456022  | 10.350910528 |
| O | 9.723636619  | 11.076332769 | 2.959286585  |
| O | 9.725571821  | 11.075607316 | 0.001627516  |
| O | 3.244722127  | 11.075310134 | 2.958348616  |
| O | 3.242383883  | 11.075224409 | 0.001108434  |
| O | 3.244545089  | 11.075238697 | 8.872167232  |
| O | 3.244477028  | 11.075780553 | 5.915190850  |
| O | 9.724636627  | 11.075535521 | 8.873037654  |
| O | 9.724393996  | 11.076071306 | 5.916477437  |
| O | 6.460488451  | 11.777141540 | 8.873718566  |
| O | -0.029556014 | 11.801929436 | 2.953969534  |
| O | 6.463097771  | 11.786210230 | 0.012446514  |
| O | 6.462915668  | 11.788474099 | 5.910880499  |
| O | -0.028839163 | 11.801976943 | -0.003147028 |
| O | -0.029735390 | 11.801449016 | 5.911026121  |
| O | 6.462843970  | 11.792631073 | 2.962696349  |
| O | -0.029441973 | 11.801254705 | 8.868972649  |

|   |              |              |              |
|---|--------------|--------------|--------------|
| O | 8.430093847  | 13.097637721 | 1.481079051  |
| O | 8.430691072  | 13.100279139 | 4.440846390  |
| O | 10.965475525 | 13.120890773 | 1.481404838  |
| O | 10.965979620 | 13.120539655 | 4.438915327  |
| O | 1.957778184  | 13.102810900 | 1.480795614  |
| O | 1.957600498  | 13.101344636 | 4.436942504  |
| O | 4.493569659  | 13.116789878 | 1.479157096  |
| O | 4.493268189  | 13.120126744 | 4.439138433  |
| O | 1.957984057  | 13.101196402 | 7.395279408  |
| O | 1.957909761  | 13.102380129 | 10.350033955 |
| O | 4.494458093  | 13.116804165 | 7.394082844  |
| O | 4.493721108  | 13.109249245 | 10.352565253 |
| O | 8.429254901  | 13.096545792 | 7.396377787  |
| O | 8.429102802  | 13.089734541 | 10.352893051 |
| O | 10.965923119 | 13.120855411 | 7.396645017  |
| O | 10.965661265 | 13.120861483 | 10.352408747 |
| O | -0.031748394 | 14.414669161 | 2.965585965  |
| O | -0.030490169 | 14.414594508 | 5.922738016  |
| O | -0.031277810 | 14.413639740 | 8.879458643  |
| O | -0.030915682 | 14.414447346 | 0.006974259  |
| O | 6.460091254  | 14.406606674 | 2.962434205  |
| O | 6.464435618  | 14.414539858 | 5.921739243  |

|   |              |              |              |
|---|--------------|--------------|--------------|
| O | 6.461142048  | 14.380817932 | 8.877638304  |
| O | 6.463764227  | 14.409637072 | -0.004985348 |
| O | 9.679630825  | 15.124587342 | 8.875027866  |
| O | 3.199683852  | 15.124787726 | 8.872600905  |
| O | 9.682063887  | 15.122298471 | 5.919615594  |
| O | 9.678992815  | 15.118407246 | 2.962774306  |
| O | 3.199213658  | 15.120439298 | 2.961344225  |
| O | 9.683628258  | 15.117768590 | -0.002038713 |
| O | 3.191556111  | 15.118209720 | -0.004052939 |
| O | 3.193451306  | 15.123129651 | 5.917867652  |
| O | 1.234883143  | 16.484531201 | 10.350380207 |
| O | 5.163894220  | 16.457512297 | 4.451151628  |
| O | 5.165736292  | 16.445060306 | 7.391729582  |
| O | 7.720021999  | 16.451304340 | 1.474111890  |
| O | 7.717917943  | 16.471559141 | 4.443174574  |
| O | 5.166408852  | 16.450908931 | 10.356010032 |
| O | 11.648318562 | 16.469368139 | 1.478849644  |
| O | 11.646967467 | 16.471873111 | 4.442149184  |
| O | 1.234736370  | 16.488169536 | 4.438936738  |
| O | 1.233295652  | 16.485256653 | 1.481575539  |
| O | 5.160858348  | 16.437154625 | 1.466247926  |
| O | 7.716701672  | 16.458829256 | 7.398313464  |



|   |              |              |              |
|---|--------------|--------------|--------------|
| O | 7.715663218  | 16.462411869 | 10.350117827 |
| O | 1.235552456  | 16.486353226 | 7.398912160  |
| O | 11.647033450 | 16.472311026 | 7.398774819  |
| O | 11.647561055 | 16.471390905 | 10.351347987 |
| O | 3.231885945  | 17.774768767 | 8.874378066  |
| O | 3.210161398  | 17.748006326 | -0.002633742 |
| O | 9.663691359  | 17.753600275 | 2.954589760  |
| O | 9.662543409  | 17.754711492 | 5.925571915  |
| O | 3.223899522  | 17.754718278 | 2.952889847  |
| O | 3.211965932  | 17.754046405 | 5.922532536  |
| O | 9.643917470  | 17.769515578 | 8.876373365  |
| O | 9.663525103  | 17.750919923 | -0.002222545 |
| O | 6.447107779  | 18.642033316 | 0.003980779  |
| O | 6.444020861  | 18.638434629 | 5.971005150  |
| O | -0.067863752 | 18.518384229 | -0.005719730 |
| O | 6.418873245  | 18.404728239 | 2.935627266  |
| O | -0.068264327 | 18.518190989 | 5.923670662  |
| O | 6.413483153  | 18.421905137 | 8.860969333  |
| O | -0.069481897 | 18.520890629 | 8.874905193  |
| O | -0.076103977 | 18.515626367 | 2.962006210  |
| O | 1.968509921  | 19.938999265 | 4.430229916  |
| O | 4.440286484  | 19.987921401 | 1.441815899  |

|   |              |              |              |
|---|--------------|--------------|--------------|
| O | 4.449785063  | 19.962764527 | 4.461655485  |
| O | 1.983253118  | 19.957743511 | 7.409979816  |
| O | 1.984136746  | 19.964377953 | 10.333572593 |
| O | 4.487331528  | 20.038632343 | 7.369542694  |
| O | 4.489567550  | 20.013030411 | 10.378213009 |
| O | 8.410168768  | 19.980269325 | 1.453180714  |
| O | 8.399859558  | 19.954848845 | 4.453361989  |
| O | 10.881334858 | 19.946960667 | 1.478123189  |
| O | 10.874833314 | 19.954810626 | 4.440572180  |
| O | 8.359133305  | 20.065614813 | 7.377971994  |
| O | 8.360101620  | 20.047299552 | 10.374160069 |
| O | 10.864055987 | 19.963557131 | 7.408789995  |
| O | 10.863867520 | 19.969537202 | 10.336449079 |
| O | 1.962492339  | 19.930886772 | 1.484788340  |
| O | -0.067063253 | 21.117533598 | 0.001621010  |
| O | 6.429373261  | 21.214700995 | 2.824883874  |
| O | -0.070269148 | 21.117340359 | 2.962809439  |
| O | -0.066987918 | 21.116634909 | 5.920857938  |
| O | -0.069471116 | 21.123565819 | 8.875036856  |
| O | 6.427496899  | 21.171412456 | 8.908698693  |
| H | 0.000000000  | 0.932899949  | 9.814800036  |
| H | 0.816399984  | 0.932899949  | 8.400899982  |

|   |              |              |              |
|---|--------------|--------------|--------------|
| H | 6.457700016  | 0.932899949  | 6.856699960  |
| H | 0.834099951  | 0.932899949  | -0.439200043 |
| H | 0.000000000  | 0.932899949  | 3.900000036  |
| H | 0.816399984  | 0.932899949  | 2.486099982  |
| H | 6.457700016  | 0.932899949  | 0.941899960  |
| H | 0.834099951  | 0.932899949  | 5.475599957  |
| H | 6.494400000  | 0.932899949  | 9.814800036  |
| H | 7.310799984  | 0.932899949  | 8.400899982  |
| H | -0.036699984 | 0.932899949  | 6.856699960  |
| H | 7.328499951  | 0.932899949  | -0.439200043 |
| H | 6.494400000  | 0.932899949  | 3.900000036  |
| H | 7.310799984  | 0.932899949  | 2.486099982  |
| H | -0.036699984 | 0.932899949  | 0.941899960  |
| H | 7.328499951  | 0.932899949  | 5.475599957  |
| H | 6.429383393  | 21.405522113 | 4.235528186  |
| H | 7.268061116  | 21.664010684 | 8.914243108  |

TS12-1:

|    |             |             |             |
|----|-------------|-------------|-------------|
| Ti | 3.247200000 | 3.247190143 | 1.478700000 |
| Ti | 3.247200000 | 3.247190143 | 4.436100000 |
| Ti | 0.000000000 | 3.247190143 | 2.957400000 |
| Ti | 0.000000000 | 3.247190143 | 0.000000000 |
| Ti | 3.247200000 | 3.247190143 | 7.393500000 |

|    |             |             |              |
|----|-------------|-------------|--------------|
| Ti | 3.247200000 | 3.247190143 | 10.350900000 |
| Ti | 0.000000000 | 3.247190143 | 8.872200000  |
| Ti | 0.000000000 | 3.247190143 | 5.914800000  |
| Ti | 9.741600000 | 3.247190143 | 1.478700000  |
| Ti | 9.741600000 | 3.247190143 | 4.436100000  |
| Ti | 6.494400000 | 3.247190143 | 2.957400000  |
| Ti | 6.494400000 | 3.247190143 | 0.000000000  |
| Ti | 9.741600000 | 3.247190143 | 7.393500000  |
| Ti | 9.741600000 | 3.247190143 | 10.350900000 |
| Ti | 6.494400000 | 3.247190143 | 8.872200000  |
| Ti | 6.494400000 | 3.247190143 | 5.914800000  |
| Ti | 0.000000000 | 6.494389931 | 4.436100000  |
| Ti | 0.000000000 | 6.494389931 | 1.478700000  |
| Ti | 3.247200000 | 6.494389931 | 2.957400000  |
| Ti | 3.247200000 | 6.494389931 | 0.000000000  |
| Ti | 0.000000000 | 6.494389931 | 10.350900000 |
| Ti | 0.000000000 | 6.494389931 | 7.393500000  |
| Ti | 3.247200000 | 6.494389931 | 8.872200000  |
| Ti | 3.247200000 | 6.494389931 | 5.914800000  |
| Ti | 6.494400000 | 6.494389931 | 4.436100000  |
| Ti | 6.494400000 | 6.494389931 | 1.478700000  |
| Ti | 9.741600000 | 6.494389931 | 2.957400000  |

|    |              |              |              |
|----|--------------|--------------|--------------|
| Ti | 9.741600000  | 6.494389931  | 0.000000000  |
| Ti | 6.494400000  | 6.494389931  | 10.350900000 |
| Ti | 6.494400000  | 6.494389931  | 7.393500000  |
| Ti | 9.741600000  | 6.494389931  | 8.872200000  |
| Ti | 9.741600000  | 6.494389931  | 5.914800000  |
| Ti | 3.230290531  | 9.739352996  | 1.478681546  |
| Ti | 3.226927081  | 9.738634330  | 4.436567269  |
| Ti | -0.011832277 | 9.837262276  | 2.957775117  |
| Ti | -0.008987340 | 9.838024876  | 0.000099250  |
| Ti | 3.228908782  | 9.739696612  | 7.393935802  |
| Ti | 3.232729178  | 9.739087604  | 10.351235487 |
| Ti | -0.010559375 | 9.837795203  | 8.873986979  |
| Ti | -0.012419891 | 9.837174764  | 5.916532208  |
| Ti | 9.740132525  | 9.740876410  | 1.481241708  |
| Ti | 9.739705713  | 9.739762692  | 4.439142928  |
| Ti | 6.484096894  | 9.741517566  | 2.973874019  |
| Ti | 6.484385765  | 9.732210273  | 0.015139522  |
| Ti | 9.738960026  | 9.739501587  | 7.396633779  |
| Ti | 9.740099794  | 9.740425637  | 10.354319109 |
| Ti | 6.485438767  | 9.737064838  | 8.884713351  |
| Ti | 6.480432234  | 9.740913915  | 5.926818755  |
| Ti | -0.032812826 | 13.183352186 | 1.516270928  |

|    |              |              |              |
|----|--------------|--------------|--------------|
| Ti | -0.033612676 | 13.177622505 | 4.472772233  |
| Ti | 3.210541060  | 12.997376704 | 2.957787656  |
| Ti | 3.210518849  | 12.998161092 | 5.914946332  |
| Ti | 6.458301787  | 13.013686345 | 1.496293809  |
| Ti | 6.461799671  | 13.071799687 | 4.455327595  |
| Ti | 9.709488050  | 12.999848457 | 2.961598917  |
| Ti | 9.711750439  | 12.998576147 | 5.920124503  |
| Ti | -0.032596303 | 13.181788052 | 7.430665528  |
| Ti | -0.033598519 | 13.178823377 | 10.388529958 |
| Ti | 3.210436111  | 12.997552798 | 8.872342192  |
| Ti | 3.210872015  | 12.999296599 | 0.000154731  |
| Ti | 6.461528465  | 13.044661482 | 7.382824969  |
| Ti | 6.460611325  | 13.020866216 | 10.346995641 |
| Ti | 9.710826545  | 12.998057507 | 8.877584716  |
| Ti | 9.709906159  | 13.001452239 | 0.005692049  |
| Ti | 9.697022698  | 16.334978714 | 1.483884914  |
| Ti | 9.702857917  | 16.327205194 | 4.443209116  |
| Ti | 6.441657938  | 16.286266249 | 2.961864254  |
| Ti | -0.055358525 | 16.642626952 | 5.921680687  |
| Ti | 3.184811027  | 16.331633275 | 1.480948570  |
| Ti | 3.177106590  | 16.324612354 | 4.441487436  |
| Ti | -0.054142514 | 16.646202779 | 2.961286497  |

|    |              |              |              |
|----|--------------|--------------|--------------|
| Ti | 6.441733793  | 16.354767026 | 5.909341823  |
| Ti | 3.181421599  | 16.327031600 | 7.397213666  |
| Ti | 3.181324963  | 16.321973793 | 10.353681730 |
| Ti | -0.054351114 | 16.644794022 | 8.877508415  |
| Ti | 6.443718871  | 16.272646961 | 0.003076287  |
| Ti | 9.696392092  | 16.324298384 | 7.398301871  |
| Ti | 9.698606163  | 16.320800782 | 10.355601556 |
| Ti | 6.440098243  | 16.270510967 | 8.879893380  |
| Ti | -0.053679593 | 16.645425891 | 0.004857234  |
| Ti | 6.433470968  | 19.497270214 | 7.384045429  |
| Ti | 6.400378883  | 19.682888149 | 10.214254043 |
| Ti | 3.199311074  | 19.585300340 | 8.883064541  |
| Ti | 3.180433671  | 19.580088942 | 0.007865028  |
| Ti | 6.415431993  | 19.668410891 | 1.625790074  |
| Ti | 6.419640494  | 19.866121485 | 4.311147602  |
| Ti | 3.199358223  | 19.596741484 | 2.969661972  |
| Ti | 3.190380624  | 19.577870079 | 5.931443064  |
| Ti | -0.083399916 | 20.007876520 | 1.490672738  |
| Ti | -0.073580253 | 20.004369631 | 4.444855560  |
| Ti | 9.641097212  | 19.601131704 | 2.968478894  |
| Ti | 9.661764990  | 19.579502079 | 5.924420186  |
| Ti | -0.070659202 | 20.011487708 | 7.405559922  |

|    |              |              |              |
|----|--------------|--------------|--------------|
| Ti | -0.073148635 | 20.009552097 | 10.361222746 |
| Ti | 9.665814638  | 19.579452429 | 8.883700501  |
| Ti | 9.643298554  | 19.581895964 | 0.005218628  |
| O  | 0.000000000  | 1.266689833  | 2.957400000  |
| O  | 0.000000000  | 1.266689833  | 0.000000000  |
| O  | 0.000000000  | 1.266689833  | 8.872200000  |
| O  | 0.000000000  | 1.266689833  | 5.914800000  |
| O  | 6.494400000  | 1.266689833  | 2.957400000  |
| O  | 6.494400000  | 1.266689833  | 0.000000000  |
| O  | 6.494400000  | 1.266689833  | 8.872200000  |
| O  | 6.494400000  | 1.266689833  | 5.914800000  |
| O  | 9.741600000  | 1.980499953  | 8.872200000  |
| O  | 9.741600000  | 1.980499953  | 5.914800000  |
| O  | 9.741600000  | 1.980499953  | 2.957400000  |
| O  | 9.741600000  | 1.980499953  | 0.000000000  |
| O  | 3.247200000  | 1.980499953  | 8.872200000  |
| O  | 3.247200000  | 1.980499953  | 5.914800000  |
| O  | 3.247200000  | 1.980499953  | 2.957400000  |
| O  | 3.247200000  | 1.980499953  | 0.000000000  |
| O  | 1.266699988  | 3.247190143  | 1.478700000  |
| O  | 1.266699988  | 3.247190143  | 4.436100000  |
| O  | 5.227599998  | 3.247190143  | 1.478700000  |



|   |              |             |              |
|---|--------------|-------------|--------------|
| O | 5.227599998  | 3.247190143 | 4.436100000  |
| O | 1.266699988  | 3.247190143 | 7.393500000  |
| O | 1.266699988  | 3.247190143 | 10.350900000 |
| O | 5.227599998  | 3.247190143 | 7.393500000  |
| O | 5.227599998  | 3.247190143 | 10.350900000 |
| O | 7.761099988  | 3.247190143 | 1.478700000  |
| O | 7.761099988  | 3.247190143 | 4.436100000  |
| O | 11.721999998 | 3.247190143 | 1.478700000  |
| O | 11.721999998 | 3.247190143 | 4.436100000  |
| O | 7.761099988  | 3.247190143 | 7.393500000  |
| O | 7.761099988  | 3.247190143 | 10.350900000 |
| O | 11.721999998 | 3.247190143 | 7.393500000  |
| O | 11.721999998 | 3.247190143 | 10.350900000 |
| O | 9.741600000  | 4.513899978 | 8.872200000  |
| O | 9.741600000  | 4.513899978 | 5.914800000  |
| O | 9.741600000  | 4.513899978 | 2.957400000  |
| O | 9.741600000  | 4.513899978 | 0.000000000  |
| O | 3.247200000  | 4.513899978 | 8.872200000  |
| O | 3.247200000  | 4.513899978 | 5.914800000  |
| O | 3.247200000  | 4.513899978 | 2.957400000  |
| O | 3.247200000  | 4.513899978 | 0.000000000  |
| O | 0.000000000  | 5.227600085 | 2.957400000  |

|   |              |             |              |
|---|--------------|-------------|--------------|
| O | 0.000000000  | 5.227600085 | 0.000000000  |
| O | 0.000000000  | 5.227600085 | 8.872200000  |
| O | 0.000000000  | 5.227600085 | 5.914800000  |
| O | 6.494400000  | 5.227600085 | 0.000000000  |
| O | 6.494400000  | 5.227600085 | 2.957400000  |
| O | 6.494400000  | 5.227600085 | 8.872200000  |
| O | 6.494400000  | 5.227600085 | 5.914800000  |
| O | 8.474900012  | 6.494389931 | 7.393500000  |
| O | 11.008299988 | 6.494389931 | 7.393500000  |
| O | 8.474900012  | 6.494389931 | 10.350900000 |
| O | 11.008299988 | 6.494389931 | 10.350900000 |
| O | 8.474900012  | 6.494389931 | 1.478700000  |
| O | 11.008299988 | 6.494389931 | 1.478700000  |
| O | 8.474900012  | 6.494389931 | 4.436100000  |
| O | 11.008299988 | 6.494389931 | 4.436100000  |
| O | 1.980500012  | 6.494389931 | 1.478700000  |
| O | 4.513899988  | 6.494389931 | 1.478700000  |
| O | 1.980500012  | 6.494389931 | 4.436100000  |
| O | 4.513899988  | 6.494389931 | 4.436100000  |
| O | 1.980500012  | 6.494389931 | 7.393500000  |
| O | 4.513899988  | 6.494389931 | 7.393500000  |
| O | 1.980500012  | 6.494389931 | 10.350900000 |

|   |             |             |              |
|---|-------------|-------------|--------------|
| O | 4.513899988 | 6.494389931 | 10.350900000 |
| O | 0.000000000 | 7.761090122 | 8.872200000  |
| O | 0.000000000 | 7.761090122 | 5.914800000  |
| O | 6.494400000 | 7.761090122 | 2.957400000  |
| O | 6.494400000 | 7.761090122 | 0.000000000  |
| O | 0.000000000 | 7.761090122 | 2.957400000  |
| O | 0.000000000 | 7.761090122 | 0.000000000  |
| O | 6.494400000 | 7.761090122 | 8.872200000  |
| O | 6.494400000 | 7.761090122 | 5.914800000  |
| O | 3.247200000 | 8.474889884 | 2.957400000  |
| O | 3.247200000 | 8.474889884 | 0.000000000  |
| O | 3.247200000 | 8.474889884 | 8.872200000  |
| O | 3.247200000 | 8.474889884 | 5.914800000  |
| O | 9.741600000 | 8.474889884 | 2.957400000  |
| O | 9.741600000 | 8.474889884 | 0.000000000  |
| O | 9.741600000 | 8.474889884 | 8.872200000  |
| O | 9.741600000 | 8.474889884 | 5.914800000  |
| O | 1.270411538 | 9.789874984 | 1.479455911  |
| O | 1.269450237 | 9.789784615 | 4.436711472  |
| O | 5.211578313 | 9.773123857 | 1.484359517  |
| O | 5.210544405 | 9.768965811 | 4.441586214  |
| O | 1.270188130 | 9.790775102 | 7.393472910  |

|   |              |              |              |
|---|--------------|--------------|--------------|
| O | 1.270552726  | 9.789493863  | 10.351027760 |
| O | 5.211287364  | 9.773189937  | 7.398908611  |
| O | 5.211989149  | 9.770022736  | 10.356593586 |
| O | 7.760260392  | 9.782621175  | 1.484282388  |
| O | 7.760068937  | 9.778674943  | 4.442311013  |
| O | 11.702320927 | 9.781658906  | 1.478892822  |
| O | 11.701975035 | 9.781250995  | 4.436427088  |
| O | 7.759847608  | 9.782445438  | 7.397425061  |
| O | 7.760559524  | 9.779607208  | 10.356629548 |
| O | 11.701874112 | 9.781790352  | 7.394018018  |
| O | 11.702835283 | 9.780695208  | 10.351320187 |
| O | 9.724091877  | 11.076601375 | 2.960688156  |
| O | 9.725982527  | 11.075878066 | 0.001716712  |
| O | 3.244109835  | 11.075491587 | 2.959772663  |
| O | 3.242604952  | 11.074995807 | 0.000962220  |
| O | 3.244100613  | 11.074628259 | 8.874449044  |
| O | 3.244615489  | 11.075193691 | 5.914482020  |
| O | 9.724849514  | 11.075283345 | 8.875015681  |
| O | 9.724353471  | 11.075880566 | 5.915761037  |
| O | 6.462729409  | 11.781646417 | 8.877182036  |
| O | -0.029586538 | 11.801979800 | 2.955754266  |
| O | 6.462468724  | 11.782070401 | 0.002045574  |

|   |              |              |              |
|---|--------------|--------------|--------------|
| O | 6.462594455  | 11.788871294 | 5.911110584  |
| O | -0.029422749 | 11.802005161 | -0.002638119 |
| O | -0.030180386 | 11.801818708 | 5.911934871  |
| O | 6.462143614  | 11.785004358 | 2.975260567  |
| O | -0.029831507 | 11.801874429 | 8.871058444  |
| O | 8.428870432  | 13.087980739 | 1.483288347  |
| O | 8.430151388  | 13.104432898 | 4.439961891  |
| O | 10.965793491 | 13.121094014 | 1.483229554  |
| O | 10.965706855 | 13.121708380 | 4.438938158  |
| O | 1.957522435  | 13.101410002 | 1.481594821  |
| O | 1.957529709  | 13.101897923 | 4.437350152  |
| O | 4.493856451  | 13.107558666 | 1.481545847  |
| O | 4.493446525  | 13.124564112 | 4.438036387  |
| O | 1.957383974  | 13.098243515 | 7.396023372  |
| O | 1.957881575  | 13.102941274 | 10.353315723 |
| O | 4.493236236  | 13.110778731 | 7.396245059  |
| O | 4.495087660  | 13.114395635 | 10.355315516 |
| O | 8.430626388  | 13.091692655 | 7.397773206  |
| O | 8.428523761  | 13.094940581 | 10.356983017 |
| O | 10.966242903 | 13.119374503 | 7.397708025  |
| O | 10.965523584 | 13.122961759 | 10.355209996 |
| O | -0.031799180 | 14.415429261 | 2.966546174  |

|   |              |              |              |
|---|--------------|--------------|--------------|
| O | -0.030849829 | 14.414885618 | 5.924000353  |
| O | -0.031141038 | 14.414100515 | 8.881039432  |
| O | -0.030964000 | 14.415356751 | 0.009947629  |
| O | 6.462619264  | 14.397120429 | 2.946484118  |
| O | 6.462860596  | 14.420577794 | 5.931118460  |
| O | 6.462786949  | 14.383369696 | 8.874569114  |
| O | 6.462916058  | 14.400235481 | 0.015170161  |
| O | 9.677739136  | 15.116856328 | 8.875325854  |
| O | 3.197632661  | 15.117835385 | 8.874316552  |
| O | 9.682577984  | 15.119919944 | 5.922041016  |
| O | 9.677620678  | 15.127869559 | 2.955871497  |
| O | 3.197118694  | 15.126404010 | 2.954605848  |
| O | 9.678609256  | 15.121659101 | 0.015390191  |
| O | 3.195083479  | 15.120800417 | 0.013166463  |
| O | 3.189549861  | 15.119579900 | 5.922125243  |
| O | 1.233659468  | 16.482857767 | 10.356589446 |
| O | 5.160667153  | 16.422865607 | 4.439094663  |
| O | 5.163941629  | 16.458346693 | 7.395569707  |
| O | 7.711733066  | 16.492217924 | 1.479455083  |
| O | 7.719589862  | 16.441976330 | 4.437127637  |
| O | 5.162649244  | 16.424344373 | 10.368827759 |
| O | 11.643929387 | 16.476759467 | 1.483848952  |

|   |              |              |              |
|---|--------------|--------------|--------------|
| O | 11.646514678 | 16.472156005 | 4.441624896  |
| O | 1.233438139  | 16.488245260 | 4.440314177  |
| O | 1.236200208  | 16.491936816 | 1.485898548  |
| O | 5.168643705  | 16.476904129 | 1.476703164  |
| O | 7.715864674  | 16.474387370 | 7.397821116  |
| O | 7.717351632  | 16.438695185 | 10.365472174 |
| O | 1.233916906  | 16.486847934 | 7.400885456  |
| O | 11.645809516 | 16.470342910 | 7.400873035  |
| O | 11.646601313 | 16.468303357 | 10.358055725 |
| O | 3.222590380  | 17.755812708 | 8.888384076  |
| O | 3.215580325  | 17.755357291 | -0.001995654 |
| O | 9.645141664  | 17.774097965 | 2.971859438  |
| O | 9.659686912  | 17.751757175 | 5.918289141  |
| O | 3.235785183  | 17.770784673 | 2.971490237  |
| O | 3.218619704  | 17.749317927 | 5.916520497  |
| O | 9.654958859  | 17.753717790 | 8.888762860  |
| O | 9.655495167  | 17.757774751 | -0.004979788 |
| O | 6.440064602  | 18.713678434 | -0.033609077 |
| O | 6.431072326  | 18.559682864 | 5.823150292  |
| O | -0.069314471 | 18.519616176 | 0.006983368  |
| O | 6.418792325  | 18.463170196 | 3.030053499  |
| O | -0.071619724 | 18.518183131 | 5.930002101  |

|   |              |              |              |
|---|--------------|--------------|--------------|
| O | 6.421935615  | 18.375604059 | 8.938670522  |
| O | -0.071904438 | 18.520238401 | 8.877897254  |
| O | -0.075230350 | 18.518234566 | 2.963300723  |
| O | 1.970669958  | 19.928231423 | 4.439834605  |
| O | 4.467406579  | 19.986377269 | 1.444286629  |
| O | 4.461142470  | 20.070855143 | 4.504492004  |
| O | 1.984372363  | 19.970746646 | 7.414364694  |
| O | 1.972153149  | 19.950126797 | 10.352881458 |
| O | 4.487042527  | 19.933454609 | 7.405662248  |
| O | 4.469605193  | 20.049389469 | 10.361601766 |
| O | 8.374015872  | 19.986524432 | 1.449022491  |
| O | 8.384243513  | 20.064051036 | 4.502368473  |
| O | 10.861179747 | 19.958969386 | 1.489665921  |
| O | 10.874069573 | 19.947540029 | 4.438342419  |
| O | 8.373793244  | 19.961118954 | 7.405017772  |
| O | 8.370923239  | 20.084125457 | 10.339260620 |
| O | 10.867011069 | 19.978320498 | 7.411352759  |
| O | 10.871733277 | 19.959498027 | 10.358138532 |
| O | 1.976194484  | 19.946457744 | 1.499144388  |
| O | -0.068589566 | 21.119352051 | 0.012119780  |
| O | 6.423851203  | 21.046389260 | 2.892232981  |
| O | -0.070948333 | 21.119096303 | 2.967593093  |



|   |              |              |              |
|---|--------------|--------------|--------------|
| O | -0.067959220 | 21.117356075 | 5.923896253  |
| O | -0.071431776 | 21.122967169 | 8.882956655  |
| O | 6.421475422  | 21.327185402 | 8.890216244  |
| H | 0.000000000  | 0.932899949  | 9.814800036  |
| H | 0.816399984  | 0.932899949  | 8.400899982  |
| H | 6.457700016  | 0.932899949  | 6.856699960  |
| H | 0.834099951  | 0.932899949  | -0.439200043 |
| H | 0.000000000  | 0.932899949  | 3.900000036  |
| H | 0.816399984  | 0.932899949  | 2.486099982  |
| H | 6.457700016  | 0.932899949  | 0.941899960  |
| H | 0.834099951  | 0.932899949  | 5.475599957  |
| H | 6.494400000  | 0.932899949  | 9.814800036  |
| H | 7.310799984  | 0.932899949  | 8.400899982  |
| H | -0.036699984 | 0.932899949  | 6.856699960  |
| H | 7.328499951  | 0.932899949  | -0.439200043 |
| H | 6.494400000  | 0.932899949  | 3.900000036  |
| H | 7.310799984  | 0.932899949  | 2.486099982  |
| H | -0.036699984 | 0.932899949  | 0.941899960  |
| H | 7.328499951  | 0.932899949  | 5.475599957  |
| H | 6.323901088  | 21.346380422 | 7.611662666  |
| H | 7.327580344  | 21.692230102 | 8.967554147  |

12-d:

|    |             |             |              |
|----|-------------|-------------|--------------|
| Ti | 3.247200000 | 3.247194072 | 1.478700000  |
| Ti | 3.247200000 | 3.247194072 | 4.436100000  |
| Ti | 0.000000000 | 3.247194072 | 2.957400000  |
| Ti | 0.000000000 | 3.247194072 | 0.000000000  |
| Ti | 3.247200000 | 3.247194072 | 7.393500000  |
| Ti | 3.247200000 | 3.247194072 | 10.350900000 |
| Ti | 0.000000000 | 3.247194072 | 8.872200000  |
| Ti | 0.000000000 | 3.247194072 | 5.914800000  |
| Ti | 9.741600000 | 3.247194072 | 1.478700000  |
| Ti | 9.741600000 | 3.247194072 | 4.436100000  |
| Ti | 6.494400000 | 3.247194072 | 2.957400000  |
| Ti | 6.494400000 | 3.247194072 | 0.000000000  |
| Ti | 9.741600000 | 3.247194072 | 7.393500000  |
| Ti | 9.741600000 | 3.247194072 | 10.350900000 |
| Ti | 6.494400000 | 3.247194072 | 8.872200000  |
| Ti | 6.494400000 | 3.247194072 | 5.914800000  |
| Ti | 0.000000000 | 6.494391717 | 4.436100000  |
| Ti | 0.000000000 | 6.494391717 | 1.478700000  |
| Ti | 3.247200000 | 6.494391717 | 2.957400000  |
| Ti | 3.247200000 | 6.494391717 | 0.000000000  |
| Ti | 0.000000000 | 6.494391717 | 10.350900000 |
| Ti | 0.000000000 | 6.494391717 | 7.393500000  |

|    |              |             |              |
|----|--------------|-------------|--------------|
| Ti | 3.247200000  | 6.494391717 | 8.872200000  |
| Ti | 3.247200000  | 6.494391717 | 5.914800000  |
| Ti | 6.494400000  | 6.494391717 | 4.436100000  |
| Ti | 6.494400000  | 6.494391717 | 1.478700000  |
| Ti | 9.741600000  | 6.494391717 | 2.957400000  |
| Ti | 9.741600000  | 6.494391717 | 0.000000000  |
| Ti | 6.494400000  | 6.494391717 | 10.350900000 |
| Ti | 6.494400000  | 6.494391717 | 7.393500000  |
| Ti | 9.741600000  | 6.494391717 | 8.872200000  |
| Ti | 9.741600000  | 6.494391717 | 5.914800000  |
| Ti | 3.231446924  | 9.738533602 | 1.479178981  |
| Ti | 3.227481443  | 9.740798543 | 4.436441639  |
| Ti | -0.011048663 | 9.839582580 | 2.957365221  |
| Ti | -0.007622088 | 9.838187397 | -0.000269478 |
| Ti | 3.231935173  | 9.739063315 | 7.393261515  |
| Ti | 3.233083382  | 9.739322992 | 10.350914314 |
| Ti | -0.009580669 | 9.839296114 | 8.872264945  |
| Ti | -0.012454181 | 9.837809133 | 5.916334417  |
| Ti | 9.742007978  | 9.739543735 | 1.481781493  |
| Ti | 9.739156937  | 9.740441710 | 4.438843284  |
| Ti | 6.483768797  | 9.741656512 | 2.973350086  |
| Ti | 6.486656077  | 9.733561878 | 0.018869395  |

|    |              |              |              |
|----|--------------|--------------|--------------|
| Ti | 9.737239530  | 9.739389072  | 7.396254404  |
| Ti | 9.741112271  | 9.739796625  | 10.354062998 |
| Ti | 6.485911559  | 9.729478128  | 8.888835138  |
| Ti | 6.481689680  | 9.735387832  | 5.927103139  |
| Ti | -0.031588502 | 13.186125050 | 1.514798616  |
| Ti | -0.032290936 | 13.181208690 | 4.473202357  |
| Ti | 3.211328182  | 12.999420901 | 2.957984974  |
| Ti | 3.211341690  | 12.999523414 | 5.915006190  |
| Ti | 6.462318184  | 13.049584985 | 1.503749769  |
| Ti | 6.462519770  | 13.058086458 | 4.426034785  |
| Ti | 9.713203366  | 13.000074201 | 2.963797093  |
| Ti | 9.711755115  | 12.998802962 | 5.921089443  |
| Ti | -0.032165724 | 13.185714996 | 7.430442658  |
| Ti | -0.033097930 | 13.182950347 | 10.387801373 |
| Ti | 3.211899169  | 12.997541368 | 8.873028309  |
| Ti | 3.212197782  | 12.998436486 | 0.001343961  |
| Ti | 6.461672900  | 12.997858910 | 7.380596627  |
| Ti | 6.462178944  | 13.001503674 | 10.374893741 |
| Ti | 9.711857337  | 12.998380050 | 8.877636174  |
| Ti | 9.713423396  | 12.998367548 | 0.007768498  |
| Ti | 9.699502520  | 16.331887951 | 1.484495913  |
| Ti | 9.701112482  | 16.330901750 | 4.440971548  |

|    |              |              |              |
|----|--------------|--------------|--------------|
| Ti | 6.442706135  | 16.323730452 | 2.964930605  |
| Ti | -0.053191474 | 16.647170048 | 5.919944456  |
| Ti | 3.188535565  | 16.333161333 | 1.481761974  |
| Ti | 3.183820241  | 16.331087489 | 4.437882248  |
| Ti | -0.051923637 | 16.648130174 | 2.959823885  |
| Ti | 6.444517033  | 16.290977939 | 5.913216135  |
| Ti | 3.187035099  | 16.325753932 | 7.392315857  |
| Ti | 3.185118732  | 16.319928167 | 10.355530815 |
| Ti | -0.052478519 | 16.652275719 | 8.874558112  |
| Ti | 6.446257143  | 16.285994070 | 0.010395143  |
| Ti | 9.694916434  | 16.326911941 | 7.393898658  |
| Ti | 9.699111167  | 16.320752561 | 10.356235031 |
| Ti | 6.439837558  | 16.211467503 | 8.878402851  |
| Ti | -0.051720882 | 16.649301042 | 0.001968682  |
| Ti | 6.417131187  | 19.481148455 | 7.386789305  |
| Ti | 6.419125618  | 19.498714332 | 10.353738749 |
| Ti | 3.213180255  | 19.590195982 | 8.877948003  |
| Ti | 3.194668617  | 19.585113172 | 0.010408155  |
| Ti | 6.421069132  | 19.763476584 | 1.669016971  |
| Ti | 6.415983107  | 19.806409005 | 4.275047094  |
| Ti | 3.217892072  | 19.603927785 | 2.962965945  |
| Ti | 3.189223192  | 19.586800537 | 5.916785243  |

|    |              |              |              |
|----|--------------|--------------|--------------|
| Ti | -0.077354019 | 20.006373108 | 1.489313635  |
| Ti | -0.079066073 | 20.002939443 | 4.441614841  |
| Ti | 9.623662086  | 19.600234443 | 2.966650511  |
| Ti | 9.654038343  | 19.586097587 | 5.920836645  |
| Ti | -0.080611610 | 20.015271776 | 7.404550384  |
| Ti | -0.078108149 | 20.015065678 | 10.355886650 |
| Ti | 9.624386731  | 19.592286257 | 8.880466051  |
| Ti | 9.656255661  | 19.583942304 | 0.010183275  |
| O  | 0.000000000  | 1.266694833  | 2.957400000  |
| O  | 0.000000000  | 1.266694833  | 0.000000000  |
| O  | 0.000000000  | 1.266694833  | 8.872200000  |
| O  | 0.000000000  | 1.266694833  | 5.914800000  |
| O  | 6.494400000  | 1.266694833  | 2.957400000  |
| O  | 6.494400000  | 1.266694833  | 0.000000000  |
| O  | 6.494400000  | 1.266694833  | 8.872200000  |
| O  | 6.494400000  | 1.266694833  | 5.914800000  |
| O  | 9.741600000  | 1.980495667  | 8.872200000  |
| O  | 9.741600000  | 1.980495667  | 5.914800000  |
| O  | 9.741600000  | 1.980495667  | 2.957400000  |
| O  | 9.741600000  | 1.980495667  | 0.000000000  |
| O  | 3.247200000  | 1.980495667  | 8.872200000  |
| O  | 3.247200000  | 1.980495667  | 5.914800000  |

|   |              |             |              |
|---|--------------|-------------|--------------|
| O | 3.247200000  | 1.980495667 | 2.957400000  |
| O | 3.247200000  | 1.980495667 | 0.000000000  |
| O | 1.266698949  | 3.247194072 | 1.478700000  |
| O | 1.266698949  | 3.247194072 | 4.436100000  |
| O | 5.227599738  | 3.247194072 | 1.478700000  |
| O | 5.227599738  | 3.247194072 | 4.436100000  |
| O | 1.266698949  | 3.247194072 | 7.393500000  |
| O | 1.266698949  | 3.247194072 | 10.350900000 |
| O | 5.227599738  | 3.247194072 | 7.393500000  |
| O | 5.227599738  | 3.247194072 | 10.350900000 |
| O | 7.761098949  | 3.247194072 | 1.478700000  |
| O | 7.761098949  | 3.247194072 | 4.436100000  |
| O | 11.721999738 | 3.247194072 | 1.478700000  |
| O | 11.721999738 | 3.247194072 | 4.436100000  |
| O | 7.761098949  | 3.247194072 | 7.393500000  |
| O | 7.761098949  | 3.247194072 | 10.350900000 |
| O | 11.721999738 | 3.247194072 | 7.393500000  |
| O | 11.721999738 | 3.247194072 | 10.350900000 |
| O | 9.741600000  | 4.513896049 | 8.872200000  |
| O | 9.741600000  | 4.513896049 | 5.914800000  |
| O | 9.741600000  | 4.513896049 | 2.957400000  |
| O | 9.741600000  | 4.513896049 | 0.000000000  |

|   |              |             |              |
|---|--------------|-------------|--------------|
| O | 3.247200000  | 4.513896049 | 8.872200000  |
| O | 3.247200000  | 4.513896049 | 5.914800000  |
| O | 3.247200000  | 4.513896049 | 2.957400000  |
| O | 3.247200000  | 4.513896049 | 0.000000000  |
| O | 0.000000000  | 5.227596870 | 2.957400000  |
| O | 0.000000000  | 5.227596870 | 0.000000000  |
| O | 0.000000000  | 5.227596870 | 8.872200000  |
| O | 0.000000000  | 5.227596870 | 5.914800000  |
| O | 6.494400000  | 5.227596870 | 0.000000000  |
| O | 6.494400000  | 5.227596870 | 2.957400000  |
| O | 6.494400000  | 5.227596870 | 8.872200000  |
| O | 6.494400000  | 5.227596870 | 5.914800000  |
| O | 8.474899752  | 6.494391717 | 7.393500000  |
| O | 11.008298949 | 6.494391717 | 7.393500000  |
| O | 8.474899752  | 6.494391717 | 10.350900000 |
| O | 11.008298949 | 6.494391717 | 10.350900000 |
| O | 8.474899752  | 6.494391717 | 1.478700000  |
| O | 11.008298949 | 6.494391717 | 1.478700000  |
| O | 8.474899752  | 6.494391717 | 4.436100000  |
| O | 11.008298949 | 6.494391717 | 4.436100000  |
| O | 1.980499752  | 6.494391717 | 1.478700000  |
| O | 4.513898949  | 6.494391717 | 1.478700000  |



|   |             |             |              |
|---|-------------|-------------|--------------|
| O | 1.980499752 | 6.494391717 | 4.436100000  |
| O | 4.513898949 | 6.494391717 | 4.436100000  |
| O | 1.980499752 | 6.494391717 | 7.393500000  |
| O | 4.513898949 | 6.494391717 | 7.393500000  |
| O | 1.980499752 | 6.494391717 | 10.350900000 |
| O | 4.513898949 | 6.494391717 | 10.350900000 |
| O | 0.000000000 | 7.761086550 | 8.872200000  |
| O | 0.000000000 | 7.761086550 | 5.914800000  |
| O | 6.494400000 | 7.761086550 | 2.957400000  |
| O | 6.494400000 | 7.761086550 | 0.000000000  |
| O | 0.000000000 | 7.761086550 | 2.957400000  |
| O | 0.000000000 | 7.761086550 | 0.000000000  |
| O | 6.494400000 | 7.761086550 | 8.872200000  |
| O | 6.494400000 | 7.761086550 | 5.914800000  |
| O | 3.247200000 | 8.474887384 | 2.957400000  |
| O | 3.247200000 | 8.474887384 | 0.000000000  |
| O | 3.247200000 | 8.474887384 | 8.872200000  |
| O | 3.247200000 | 8.474887384 | 5.914800000  |
| O | 9.741600000 | 8.474887384 | 2.957400000  |
| O | 9.741600000 | 8.474887384 | 0.000000000  |
| O | 9.741600000 | 8.474887384 | 8.872200000  |
| O | 9.741600000 | 8.474887384 | 5.914800000  |

|   |              |              |              |
|---|--------------|--------------|--------------|
| O | 1.270447906  | 9.791575922  | 1.478785528  |
| O | 1.269267484  | 9.790980486  | 4.435851815  |
| O | 5.211446477  | 9.767371673  | 1.483621350  |
| O | 5.210317361  | 9.765130308  | 4.441295915  |
| O | 1.270038889  | 9.791326961  | 7.392533522  |
| O | 1.270924855  | 9.790514711  | 10.350310768 |
| O | 5.211262555  | 9.768296080  | 7.399472174  |
| O | 5.212195931  | 9.766842318  | 10.356625290 |
| O | 7.762211180  | 9.776465724  | 1.484173911  |
| O | 7.761084272  | 9.774065766  | 4.442015155  |
| O | 11.703362239 | 9.782665467  | 1.478077881  |
| O | 11.702527059 | 9.782353997  | 4.435458836  |
| O | 7.760740718  | 9.777501217  | 7.397858616  |
| O | 7.761941662  | 9.775650260  | 10.356251948 |
| O | 11.702540178 | 9.783013012  | 7.393414827  |
| O | 11.703829316 | 9.781799639  | 10.350635254 |
| O | 9.724052391  | 11.076265260 | 2.959486032  |
| O | 9.726281269  | 11.074942586 | 0.001596286  |
| O | 3.245228820  | 11.076356343 | 2.958299050  |
| O | 3.243544302  | 11.074894366 | 0.000765257  |
| O | 3.243769918  | 11.074339650 | 8.873631618  |
| O | 3.242992408  | 11.075343353 | 5.914551224  |

|   |              |              |              |
|---|--------------|--------------|--------------|
| O | 9.725260869  | 11.074864719 | 8.874720769  |
| O | 9.726125403  | 11.075037956 | 5.915483869  |
| O | 6.463292993  | 11.770370294 | 8.879818854  |
| O | -0.028747981 | 11.805200223 | 2.954452419  |
| O | 6.464052968  | 11.774258662 | 0.011311700  |
| O | 6.462961389  | 11.773438197 | 5.908028974  |
| O | -0.028227520 | 11.805022700 | -0.003864139 |
| O | -0.029033085 | 11.805645281 | 5.910678567  |
| O | 6.463203240  | 11.774990901 | 2.964601860  |
| O | -0.028623159 | 11.805134857 | 8.869077577  |
| O | 8.433561727  | 13.093852581 | 1.482251837  |
| O | 8.433167257  | 13.096926556 | 4.440817526  |
| O | 10.968527373 | 13.120157105 | 1.482872063  |
| O | 10.968003925 | 13.120888630 | 4.439025697  |
| O | 1.957570364  | 13.101931142 | 1.480696718  |
| O | 1.957462557  | 13.103130585 | 4.436296963  |
| O | 4.492968797  | 13.115348974 | 1.479761352  |
| O | 4.492804229  | 13.118500459 | 4.438667851  |
| O | 1.957551530  | 13.102404775 | 7.395395575  |
| O | 1.957957040  | 13.102811257 | 10.351622789 |
| O | 4.493860738  | 13.104623281 | 7.394106858  |
| O | 4.494898932  | 13.111489539 | 10.354202469 |

|   |              |              |              |
|---|--------------|--------------|--------------|
| O | 8.430863823  | 13.084256322 | 7.396472778  |
| O | 8.430969682  | 13.091971263 | 10.355913030 |
| O | 10.967351497 | 13.120526082 | 7.397583341  |
| O | 10.967343444 | 13.121875188 | 10.353394744 |
| O | -0.030214157 | 14.421687940 | 2.965088767  |
| O | -0.030557841 | 14.421611144 | 5.922193618  |
| O | -0.030060759 | 14.419808407 | 8.880001739  |
| O | -0.030578233 | 14.421548993 | 0.008110847  |
| O | 6.466402512  | 14.390640293 | 2.958130005  |
| O | 6.465733589  | 14.390362042 | 5.929483609  |
| O | 6.462915668  | 14.353942619 | 8.873799599  |
| O | 6.467115986  | 14.391786515 | 0.001563282  |
| O | 9.684812317  | 15.121748756 | 8.874497782  |
| O | 3.191655475  | 15.120275348 | 8.872154338  |
| O | 9.690005889  | 15.121296911 | 5.921401863  |
| O | 9.687160432  | 15.126776201 | 2.960551879  |
| O | 3.190024082  | 15.127208758 | 2.958095580  |
| O | 9.690791062  | 15.122469565 | 0.006204152  |
| O | 3.184758942  | 15.121810192 | 0.005422807  |
| O | 3.185586069  | 15.122152380 | 5.918344385  |
| O | 1.237348288  | 16.497262158 | 10.352387454 |
| O | 5.162689509  | 16.410180371 | 4.446952002  |

|   |              |              |              |
|---|--------------|--------------|--------------|
| O | 5.165403779  | 16.425146978 | 7.397415479  |
| O | 7.720572984  | 16.447614213 | 1.479039864  |
| O | 7.721213592  | 16.432928356 | 4.446874518  |
| O | 5.165304414  | 16.415911480 | 10.358149534 |
| O | 11.647888243 | 16.485321305 | 1.481629837  |
| O | 11.648054630 | 16.483790747 | 4.441263029  |
| O | 1.237562863  | 16.502971479 | 4.440973085  |
| O | 1.238278675  | 16.504571689 | 1.481628063  |
| O | 5.164998268  | 16.426751117 | 1.477562821  |
| O | 7.716593086  | 16.445585018 | 7.399458215  |
| O | 7.718191487  | 16.438455510 | 10.355146235 |
| O | 1.237478825  | 16.498358016 | 7.400211997  |
| O | 11.646601962 | 16.479938455 | 7.400915030  |
| O | 11.647209708 | 16.479060126 | 10.352650663 |
| O | 3.249890630  | 17.769256972 | 8.878610342  |
| O | 3.237699212  | 17.759259589 | -0.005018826 |
| O | 9.631589540  | 17.772950672 | 2.966165615  |
| O | 9.649198586  | 17.758129440 | 5.925308115  |
| O | 3.256423087  | 17.776624725 | 2.963854111  |
| O | 3.236316555  | 17.759672143 | 5.923323818  |
| O | 9.635110804  | 17.771719081 | 8.879643421  |
| O | 9.650517209  | 17.757475426 | -0.003586262 |

|   |              |              |              |
|---|--------------|--------------|--------------|
| O | 6.420817539  | 18.550085175 | 0.047318518  |
| O | 6.418455526  | 18.535057489 | 5.865889572  |
| O | -0.072769622 | 18.527470064 | -0.006157307 |
| O | 6.421789361  | 18.412671068 | 2.986583978  |
| O | -0.073918611 | 18.526201326 | 5.932978073  |
| O | 6.419347077  | 18.366673244 | 8.881833198  |
| O | -0.071656742 | 18.531407367 | 8.877039963  |
| O | -0.073121359 | 18.522990548 | 2.961519540  |
| O | 1.972794276  | 19.930742110 | 4.435685254  |
| O | 4.481611000  | 20.042231386 | 1.422809399  |
| O | 4.473987094  | 20.068493048 | 4.507601888  |
| O | 1.998526648  | 19.977565756 | 7.419793652  |
| O | 2.001090117  | 19.975267597 | 10.337303058 |
| O | 4.539843298  | 20.062376531 | 7.386111942  |
| O | 4.539697434  | 20.076375511 | 10.364864961 |
| O | 8.365781233  | 20.024357255 | 1.422945912  |
| O | 8.366976202  | 20.047489934 | 4.510246750  |
| O | 10.865374740 | 19.951506264 | 1.492961411  |
| O | 10.866835980 | 19.948116890 | 4.437005201  |
| O | 8.300444711  | 20.052973153 | 7.386776292  |
| O | 8.304410322  | 20.066777823 | 10.367719207 |
| O | 10.843076607 | 19.993539638 | 7.422472938  |

|   |              |              |              |
|---|--------------|--------------|--------------|
| O | 10.845894787 | 19.988192151 | 10.336983067 |
| O | 1.978397385  | 19.938150225 | 1.489292106  |
| O | -0.069506576 | 21.121982039 | 0.005934555  |
| O | 6.431839834  | 21.111771056 | 2.949236156  |
| O | -0.067920124 | 21.120753664 | 2.964769368  |
| O | -0.068838692 | 21.120201806 | 5.921554583  |
| O | -0.068650224 | 21.132237671 | 8.879406237  |
| O | 6.424649624  | 21.350652768 | 8.882312534  |
| H | 0.000000000  | 0.932897449  | 9.814799089  |
| H | 0.816399334  | 0.932897449  | 8.400899272  |
| H | 6.457698847  | 0.932897449  | 6.856699960  |
| H | 0.834099172  | 0.932897449  | -0.439201108 |
| H | 0.000000000  | 0.932897449  | 3.899999089  |
| H | 0.816399334  | 0.932897449  | 2.486099272  |
| H | 6.457698847  | 0.932897449  | 0.941899960  |
| H | 0.834099172  | 0.932897449  | 5.475598892  |
| H | 6.494400000  | 0.932897449  | 9.814799089  |
| H | 7.310799334  | 0.932897449  | 8.400899272  |
| H | -0.036701153 | 0.932897449  | 6.856699960  |
| H | 7.328499172  | 0.932897449  | -0.439201108 |
| H | 6.494400000  | 0.932897449  | 3.899999089  |
| H | 7.310799334  | 0.932897449  | 2.486099272  |

|   |              |              |             |
|---|--------------|--------------|-------------|
| H | -0.036701153 | 0.932897449  | 0.941899960 |
| H | 7.328499172  | 0.932897449  | 5.475598892 |
| H | 7.227079504  | 21.902411976 | 8.907152683 |
| H | 5.619225826  | 21.901619014 | 8.909219550 |

13-Ea:

|    |             |             |              |
|----|-------------|-------------|--------------|
| Ti | 3.247200000 | 3.247194072 | 1.478700000  |
| Ti | 3.247200000 | 3.247194072 | 4.436100000  |
| Ti | 0.000000000 | 3.247194072 | 2.957400000  |
| Ti | 0.000000000 | 3.247194072 | 0.000000000  |
| Ti | 3.247200000 | 3.247194072 | 7.393500000  |
| Ti | 3.247200000 | 3.247194072 | 10.350900000 |
| Ti | 0.000000000 | 3.247194072 | 8.872200000  |
| Ti | 0.000000000 | 3.247194072 | 5.914800000  |
| Ti | 9.741600000 | 3.247194072 | 1.478700000  |
| Ti | 9.741600000 | 3.247194072 | 4.436100000  |
| Ti | 6.494400000 | 3.247194072 | 2.957400000  |
| Ti | 6.494400000 | 3.247194072 | 0.000000000  |
| Ti | 9.741600000 | 3.247194072 | 7.393500000  |
| Ti | 9.741600000 | 3.247194072 | 10.350900000 |
| Ti | 6.494400000 | 3.247194072 | 8.872200000  |
| Ti | 6.494400000 | 3.247194072 | 5.914800000  |
| Ti | 0.000000000 | 6.494391717 | 4.436100000  |



|    |              |             |              |
|----|--------------|-------------|--------------|
| Ti | 0.000000000  | 6.494391717 | 1.478700000  |
| Ti | 3.247200000  | 6.494391717 | 2.957400000  |
| Ti | 3.247200000  | 6.494391717 | 0.000000000  |
| Ti | 0.000000000  | 6.494391717 | 10.350900000 |
| Ti | 0.000000000  | 6.494391717 | 7.393500000  |
| Ti | 3.247200000  | 6.494391717 | 8.872200000  |
| Ti | 3.247200000  | 6.494391717 | 5.914800000  |
| Ti | 6.494400000  | 6.494391717 | 4.436100000  |
| Ti | 6.494400000  | 6.494391717 | 1.478700000  |
| Ti | 9.741600000  | 6.494391717 | 2.957400000  |
| Ti | 9.741600000  | 6.494391717 | 0.000000000  |
| Ti | 6.494400000  | 6.494391717 | 10.350900000 |
| Ti | 6.494400000  | 6.494391717 | 7.393500000  |
| Ti | 9.741600000  | 6.494391717 | 8.872200000  |
| Ti | 9.741600000  | 6.494391717 | 5.914800000  |
| Ti | 3.230345214  | 9.748556704 | 1.480573217  |
| Ti | 3.233306011  | 9.746905416 | 4.436664509  |
| Ti | -0.016314842 | 9.737530257 | 2.970009526  |
| Ti | -0.013711107 | 9.762755710 | 0.007984862  |
| Ti | 3.235570868  | 9.747096155 | 7.394703780  |
| Ti | 3.233852319  | 9.744381156 | 10.352681538 |
| Ti | -0.014635780 | 9.771088947 | 8.882974045  |

|    |              |              |              |
|----|--------------|--------------|--------------|
| Ti | -0.014034918 | 9.767071277  | 5.930092715  |
| Ti | 9.728307132  | 9.748630642  | 1.480593682  |
| Ti | 9.725398810  | 9.750302290  | 4.435727249  |
| Ti | 6.478801750  | 9.749738645  | 2.962078962  |
| Ti | 6.478190497  | 9.756941019  | 0.008738880  |
| Ti | 9.726180996  | 9.745160901  | 7.392798860  |
| Ti | 9.727498320  | 9.745462012  | 10.352831655 |
| Ti | 6.481613306  | 9.748354534  | 8.884259449  |
| Ti | 6.478997361  | 9.741092867  | 5.923254733  |
| Ti | -0.036010409 | 13.017385759 | 1.451930562  |
| Ti | -0.032630074 | 13.022645020 | 4.468133137  |
| Ti | 3.212558221  | 13.012442253 | 2.959618878  |
| Ti | 3.211448588  | 13.008862854 | 5.917493837  |
| Ti | 6.461232450  | 13.098823591 | 1.462887137  |
| Ti | 6.458802505  | 13.025278580 | 4.423159601  |
| Ti | 9.708399458  | 13.015925210 | 2.963122451  |
| Ti | 9.708493497  | 13.010472708 | 5.919122536  |
| Ti | -0.033675932 | 13.145944061 | 7.448217105  |
| Ti | -0.035605418 | 13.149029466 | 10.303642404 |
| Ti | 3.213521211  | 13.007867366 | 8.874904601  |
| Ti | 3.208335822  | 13.008079894 | 0.001660876  |
| Ti | 6.459207496  | 13.025352876 | 7.422992139  |

|    |              |              |              |
|----|--------------|--------------|--------------|
| Ti | 6.459771729  | 13.097782026 | 10.380916190 |
| Ti | 9.704913005  | 13.007206923 | 8.875758225  |
| Ti | 9.709280229  | 13.009924065 | 0.004044777  |
| Ti | 9.697402750  | 16.337064345 | 1.485552296  |
| Ti | 9.692444536  | 16.340940211 | 4.445656779  |
| Ti | 6.430998030  | 16.326094691 | 2.956384192  |
| Ti | -0.050553319 | 16.344966097 | 5.951842500  |
| Ti | 3.175139826  | 16.330891035 | 1.484234123  |
| Ti | 3.184729587  | 16.337728361 | 4.445764783  |
| Ti | -0.057739502 | 16.288280799 | 2.970923954  |
| Ti | 6.449173908  | 16.274420408 | 5.922137783  |
| Ti | 3.194067625  | 16.335173025 | 7.401700397  |
| Ti | 3.181192867  | 16.332643765 | 10.354496908 |
| Ti | -0.060309336 | 16.779538137 | 8.880753511  |
| Ti | 6.443974621  | 16.422418405 | 0.011392851  |
| Ti | 9.684434083  | 16.336310318 | 7.403243095  |
| Ti | 9.691173452  | 16.334350417 | 10.356844137 |
| Ti | 6.430898536  | 16.329025433 | 8.894441304  |
| Ti | -0.054539192 | 16.348480844 | -0.013508693 |
| Ti | 6.418579828  | 19.585176038 | 7.572143403  |
| Ti | 6.415533695  | 19.948525873 | 10.482419363 |
| Ti | 3.189256833  | 19.591284697 | 8.879902489  |

|    |              |              |              |
|----|--------------|--------------|--------------|
| Ti | 3.174715092  | 19.590369219 | 0.008197203  |
| Ti | 6.407365428  | 19.954464866 | 1.387771425  |
| Ti | 6.413937242  | 19.592296972 | 4.290570960  |
| Ti | 3.165428750  | 19.581014420 | 2.969709054  |
| Ti | 3.189195396  | 19.590471376 | 5.927916306  |
| Ti | -0.071278508 | 19.611729880 | 1.283141452  |
| Ti | -0.072385154 | 19.627781273 | 4.659484843  |
| Ti | 9.692191124  | 19.583325081 | 2.971103764  |
| Ti | 9.648091810  | 19.601333159 | 5.932390024  |
| Ti | -0.067022728 | 20.136092992 | 7.428453865  |
| Ti | -0.065300413 | 20.130107206 | 10.341743771 |
| Ti | 9.681212861  | 19.590164907 | 8.885059367  |
| Ti | 9.661649390  | 19.598762464 | 0.011373806  |
| O  | 0.000000000  | 1.266694833  | 2.957400000  |
| O  | 0.000000000  | 1.266694833  | 0.000000000  |
| O  | 0.000000000  | 1.266694833  | 8.872200000  |
| O  | 0.000000000  | 1.266694833  | 5.914800000  |
| O  | 6.494400000  | 1.266694833  | 2.957400000  |
| O  | 6.494400000  | 1.266694833  | 0.000000000  |
| O  | 6.494400000  | 1.266694833  | 8.872200000  |
| O  | 6.494400000  | 1.266694833  | 5.914800000  |
| O  | 9.741600000  | 1.980495667  | 8.872200000  |

|   |              |             |              |
|---|--------------|-------------|--------------|
| O | 9.741600000  | 1.980495667 | 5.914800000  |
| O | 9.741600000  | 1.980495667 | 2.957400000  |
| O | 9.741600000  | 1.980495667 | 0.000000000  |
| O | 3.247200000  | 1.980495667 | 8.872200000  |
| O | 3.247200000  | 1.980495667 | 5.914800000  |
| O | 3.247200000  | 1.980495667 | 2.957400000  |
| O | 3.247200000  | 1.980495667 | 0.000000000  |
| O | 1.266698949  | 3.247194072 | 1.478700000  |
| O | 1.266698949  | 3.247194072 | 4.436100000  |
| O | 5.227599738  | 3.247194072 | 1.478700000  |
| O | 5.227599738  | 3.247194072 | 4.436100000  |
| O | 1.266698949  | 3.247194072 | 7.393500000  |
| O | 1.266698949  | 3.247194072 | 10.350900000 |
| O | 5.227599738  | 3.247194072 | 7.393500000  |
| O | 5.227599738  | 3.247194072 | 10.350900000 |
| O | 7.761098949  | 3.247194072 | 1.478700000  |
| O | 7.761098949  | 3.247194072 | 4.436100000  |
| O | 11.721999738 | 3.247194072 | 1.478700000  |
| O | 11.721999738 | 3.247194072 | 4.436100000  |
| O | 7.761098949  | 3.247194072 | 7.393500000  |
| O | 7.761098949  | 3.247194072 | 10.350900000 |
| O | 11.721999738 | 3.247194072 | 7.393500000  |

|   |              |             |              |
|---|--------------|-------------|--------------|
| O | 11.721999738 | 3.247194072 | 10.350900000 |
| O | 9.741600000  | 4.513896049 | 8.872200000  |
| O | 9.741600000  | 4.513896049 | 5.914800000  |
| O | 9.741600000  | 4.513896049 | 2.957400000  |
| O | 9.741600000  | 4.513896049 | 0.000000000  |
| O | 3.247200000  | 4.513896049 | 8.872200000  |
| O | 3.247200000  | 4.513896049 | 5.914800000  |
| O | 3.247200000  | 4.513896049 | 2.957400000  |
| O | 3.247200000  | 4.513896049 | 0.000000000  |
| O | 0.000000000  | 5.227596870 | 2.957400000  |
| O | 0.000000000  | 5.227596870 | 0.000000000  |
| O | 0.000000000  | 5.227596870 | 8.872200000  |
| O | 0.000000000  | 5.227596870 | 5.914800000  |
| O | 6.494400000  | 5.227596870 | 0.000000000  |
| O | 6.494400000  | 5.227596870 | 2.957400000  |
| O | 6.494400000  | 5.227596870 | 8.872200000  |
| O | 6.494400000  | 5.227596870 | 5.914800000  |
| O | 8.474899752  | 6.494391717 | 7.393500000  |
| O | 11.008298949 | 6.494391717 | 7.393500000  |
| O | 8.474899752  | 6.494391717 | 10.350900000 |
| O | 11.008298949 | 6.494391717 | 10.350900000 |
| O | 8.474899752  | 6.494391717 | 1.478700000  |

|   |              |             |              |
|---|--------------|-------------|--------------|
| O | 11.008298949 | 6.494391717 | 1.478700000  |
| O | 8.474899752  | 6.494391717 | 4.436100000  |
| O | 11.008298949 | 6.494391717 | 4.436100000  |
| O | 1.980499752  | 6.494391717 | 1.478700000  |
| O | 4.513898949  | 6.494391717 | 1.478700000  |
| O | 1.980499752  | 6.494391717 | 4.436100000  |
| O | 4.513898949  | 6.494391717 | 4.436100000  |
| O | 1.980499752  | 6.494391717 | 7.393500000  |
| O | 4.513898949  | 6.494391717 | 7.393500000  |
| O | 1.980499752  | 6.494391717 | 10.350900000 |
| O | 4.513898949  | 6.494391717 | 10.350900000 |
| O | 0.000000000  | 7.761086550 | 8.872200000  |
| O | 0.000000000  | 7.761086550 | 5.914800000  |
| O | 6.494400000  | 7.761086550 | 2.957400000  |
| O | 6.494400000  | 7.761086550 | 0.000000000  |
| O | 0.000000000  | 7.761086550 | 2.957400000  |
| O | 0.000000000  | 7.761086550 | 0.000000000  |
| O | 6.494400000  | 7.761086550 | 8.872200000  |
| O | 6.494400000  | 7.761086550 | 5.914800000  |
| O | 3.247200000  | 8.474887384 | 2.957400000  |
| O | 3.247200000  | 8.474887384 | 0.000000000  |
| O | 3.247200000  | 8.474887384 | 8.872200000  |

|   |              |              |              |
|---|--------------|--------------|--------------|
| O | 3.247200000  | 8.474887384  | 5.914800000  |
| O | 9.741600000  | 8.474887384  | 2.957400000  |
| O | 9.741600000  | 8.474887384  | 0.000000000  |
| O | 9.741600000  | 8.474887384  | 8.872200000  |
| O | 9.741600000  | 8.474887384  | 5.914800000  |
| O | 1.262775682  | 9.786447391  | 1.486306906  |
| O | 1.263254579  | 9.786068413  | 4.439561932  |
| O | 5.208379432  | 9.776951145  | 1.483013545  |
| O | 5.209075242  | 9.778498491  | 4.441085230  |
| O | 1.263635930  | 9.788962364  | 7.399780098  |
| O | 1.263446164  | 9.788819131  | 10.356179787 |
| O | 5.209177983  | 9.779412182  | 7.398833612  |
| O | 5.208716621  | 9.778067720  | 10.355962359 |
| O | 7.757948126  | 9.785796235  | 1.483407708  |
| O | 7.757543525  | 9.787602900  | 4.440672732  |
| O | 11.703668645 | 9.778402764  | 1.485264718  |
| O | 11.703584218 | 9.778088794  | 4.440974268  |
| O | 7.758434297  | 9.788153687  | 7.398488542  |
| O | 7.758751483  | 9.786440248  | 10.356717206 |
| O | 11.704026616 | 9.780943098  | 7.399348199  |
| O | 11.703797624 | 9.781212061  | 10.356794571 |
| O | 9.730227526  | 11.082849696 | 2.960344269  |



|   |              |              |             |
|---|--------------|--------------|-------------|
| O | 9.726728473  | 11.081734192 | 0.004111023 |
| O | 3.234889475  | 11.081643109 | 2.959961700 |
| O | 3.235955596  | 11.080291503 | 0.004318395 |
| O | 3.235650359  | 11.079503185 | 8.875379087 |
| O | 3.235332133  | 11.079608556 | 5.916084221 |
| O | 9.728921243  | 11.080654407 | 8.875608344 |
| O | 9.728594964  | 11.081112682 | 5.917133270 |
| O | 6.460241274  | 11.797831041 | 8.889670190 |
| O | -0.034217695 | 11.804261171 | 2.964879856 |
| O | 6.463514452  | 11.806587191 | 0.008608518 |
| O | 6.460398569  | 11.796230831 | 5.920932701 |
| O | -0.033219635 | 11.800852509 | 0.006127023 |
| O | -0.032111301 | 11.803383913 | 5.920393626 |
| O | 6.459513642  | 11.798525418 | 2.953919140 |
| O | -0.034509553 | 11.808917854 | 8.877930377 |
| O | 8.435058816  | 13.112717557 | 1.488457764 |
| O | 8.432517168  | 13.103134157 | 4.440962084 |
| O | 10.981632553 | 13.123058915 | 1.485878556 |
| O | 10.981401872 | 13.124957021 | 4.442986720 |
| O | 1.937866354  | 13.103401692 | 1.487045665 |
| O | 1.940043926  | 13.104654356 | 4.439799234 |
| O | 4.485259035  | 13.130877084 | 1.485135184 |

|   |              |              |              |
|---|--------------|--------------|--------------|
| O | 4.487276066  | 13.121768388 | 4.440790791  |
| O | 1.944937976  | 13.103609576 | 7.393976260  |
| O | 1.943191113  | 13.100258779 | 10.358602489 |
| O | 4.487780551  | 13.115320399 | 7.396811460  |
| O | 4.485667662  | 13.124874510 | 10.357318268 |
| O | 8.431894355  | 13.098179935 | 7.398562122  |
| O | 8.434172330  | 13.107760121 | 10.356042800 |
| O | 10.975528077 | 13.125285636 | 7.394208475  |
| O | 10.975658484 | 13.122884606 | 10.360370186 |
| O | -0.037188753 | 14.428653497 | 2.966923301  |
| O | -0.032935181 | 14.427651579 | 5.913511047  |
| O | -0.033513312 | 14.394997293 | 8.878271187  |
| O | -0.034298615 | 14.426157098 | 0.017524015  |
| O | 6.455026271  | 14.420226319 | 2.977534452  |
| O | 6.461825129  | 14.411878438 | 5.924120542  |
| O | 6.453975477  | 14.419466934 | 8.869095085  |
| O | 6.463423011  | 14.442098476 | 0.007454304  |
| O | 9.676061762  | 15.125140272 | 8.878196306  |
| O | 3.200173270  | 15.121676960 | 8.877417918  |
| O | 9.683502526  | 15.128199245 | 5.924022593  |
| O | 9.692642615  | 15.126764414 | 2.970060393  |
| O | 3.184872854  | 15.125005612 | 2.970088429  |

|   |              |              |              |
|---|--------------|--------------|--------------|
| O | 9.696908137  | 15.126542599 | 0.008426579  |
| O | 3.170195899  | 15.123350394 | 0.006376154  |
| O | 3.186174981  | 15.124705572 | 5.923744242  |
| O | 1.223307265  | 16.481571884 | 10.338849778 |
| O | 5.160440628  | 16.479964173 | 4.457452073  |
| O | 5.161937587  | 16.485722072 | 7.393268376  |
| O | 7.721505060  | 16.460876310 | 1.490433544  |
| O | 7.716274211  | 16.486026754 | 4.445964112  |
| O | 5.152835686  | 16.455143415 | 10.369960443 |
| O | 11.654489671 | 16.494179253 | 1.490224278  |
| O | 11.653715798 | 16.491149927 | 4.450231049  |
| O | 1.221908891  | 16.502084934 | 4.445324367  |
| O | 1.218999659  | 16.505941868 | 1.492923320  |
| O | 5.151890751  | 16.446976986 | 1.481745649  |
| O | 7.714290171  | 16.492102195 | 7.404143091  |
| O | 7.721335426  | 16.468288355 | 10.361009931 |
| O | 1.225756563  | 16.479769147 | 7.424556367  |
| O | 11.650974642 | 16.467755428 | 7.420390692  |
| O | 11.650972953 | 16.469537447 | 10.342198028 |
| O | 3.190939922  | 17.764106296 | 8.879867474  |
| O | 3.197125189  | 17.765265734 | 0.009542347  |
| O | 9.667038313  | 17.762048526 | 2.969323527  |

|   |              |              |              |
|---|--------------|--------------|--------------|
| O | 9.671518020  | 17.776203956 | 5.928380617  |
| O | 3.202764016  | 17.759988613 | 2.967766160  |
| O | 3.185956899  | 17.766682349 | 5.927698523  |
| O | 9.680397424  | 17.765521125 | 8.880225674  |
| O | 9.664519265  | 17.772376668 | 0.010741040  |
| O | 6.437596730  | 18.582065802 | 0.024876111  |
| O | 6.469792329  | 18.661096889 | 5.924069675  |
| O | -0.067585922 | 18.469747845 | -0.103156241 |
| O | 6.420672194  | 18.479900249 | 2.890795330  |
| O | -0.066162349 | 18.481437236 | 6.038637576  |
| O | 6.422432696  | 18.473812307 | 8.974174346  |
| O | -0.073070053 | 18.637255903 | 8.876076678  |
| O | -0.074380233 | 18.735030879 | 2.977920334  |
| O | 1.943566489  | 19.967326912 | 4.447363554  |
| O | 4.422773685  | 19.999724379 | 1.510123795  |
| O | 4.476425482  | 19.972246486 | 4.457838191  |
| O | 1.981556261  | 20.023434991 | 7.404852749  |
| O | 1.961529999  | 19.992089805 | 10.353533979 |
| O | 4.494671758  | 19.963997546 | 7.385683000  |
| O | 4.441938140  | 19.984193054 | 10.349980485 |
| O | 8.430278938  | 20.034830772 | 1.519885107  |
| O | 8.382127638  | 20.027032606 | 4.451568148  |

|   |              |              |              |
|---|--------------|--------------|--------------|
| O | 10.921529609 | 19.953295070 | 1.498401607  |
| O | 10.903838344 | 19.976621346 | 4.453864037  |
| O | 8.365962816  | 20.021511167 | 7.399364997  |
| O | 8.415474044  | 20.023276398 | 10.342766322 |
| O | 10.871960971 | 20.030260172 | 7.401591920  |
| O | 10.890119443 | 19.999708305 | 10.361771048 |
| O | 1.927216967  | 19.943914910 | 1.499843872  |
| O | -0.066903880 | 21.071438619 | 0.097402797  |
| O | 6.426918118  | 21.194196161 | 3.068560977  |
| O | -0.066835169 | 21.084633923 | 5.846530550  |
| O | -0.068455522 | 21.272692535 | 8.884900850  |
| O | 6.421453730  | 21.185576101 | 8.798604746  |
| O | 6.419542688  | 21.190777855 | 0.020196439  |
| H | 0.000000000  | 0.932897449  | 9.814799089  |
| H | 0.816399334  | 0.932897449  | 8.400899272  |
| H | 6.457698847  | 0.932897449  | 6.856699960  |
| H | 0.834099172  | 0.932897449  | -0.439201108 |
| H | 0.000000000  | 0.932897449  | 3.899999089  |
| H | 0.816399334  | 0.932897449  | 2.486099272  |
| H | 6.457698847  | 0.932897449  | 0.941899960  |
| H | 0.834099172  | 0.932897449  | 5.475598892  |
| H | 6.494400000  | 0.932897449  | 9.814799089  |

|   |              |              |              |
|---|--------------|--------------|--------------|
| H | 7.310799334  | 0.932897449  | 8.400899272  |
| H | -0.036701153 | 0.932897449  | 6.856699960  |
| H | 7.328499172  | 0.932897449  | -0.439201108 |
| H | 6.494400000  | 0.932897449  | 3.899999089  |
| H | 7.310799334  | 0.932897449  | 2.486099272  |
| H | -0.036701153 | 0.932897449  | 0.941899960  |
| H | 7.328499172  | 0.932897449  | 5.475598892  |
| H | 7.262399299  | 21.693013062 | 3.100355393  |
| H | 7.255064653  | 21.691738966 | 8.770402152  |

TS13-E1:

|    |             |             |              |
|----|-------------|-------------|--------------|
| Ti | 3.247200000 | 3.247190143 | 1.478700000  |
| Ti | 3.247200000 | 3.247190143 | 4.436100000  |
| Ti | 0.000000000 | 3.247190143 | 2.957400000  |
| Ti | 0.000000000 | 3.247190143 | 0.000000000  |
| Ti | 3.247200000 | 3.247190143 | 7.393500000  |
| Ti | 3.247200000 | 3.247190143 | 10.350900000 |
| Ti | 0.000000000 | 3.247190143 | 8.872200000  |
| Ti | 0.000000000 | 3.247190143 | 5.914800000  |
| Ti | 9.741600000 | 3.247190143 | 1.478700000  |
| Ti | 9.741600000 | 3.247190143 | 4.436100000  |
| Ti | 6.494400000 | 3.247190143 | 2.957400000  |
| Ti | 6.494400000 | 3.247190143 | 0.000000000  |

|    |             |             |              |
|----|-------------|-------------|--------------|
| Ti | 9.741600000 | 3.247190143 | 7.393500000  |
| Ti | 9.741600000 | 3.247190143 | 10.350900000 |
| Ti | 6.494400000 | 3.247190143 | 8.872200000  |
| Ti | 6.494400000 | 3.247190143 | 5.914800000  |
| Ti | 0.000000000 | 6.494389931 | 4.436100000  |
| Ti | 0.000000000 | 6.494389931 | 1.478700000  |
| Ti | 3.247200000 | 6.494389931 | 2.957400000  |
| Ti | 3.247200000 | 6.494389931 | 0.000000000  |
| Ti | 0.000000000 | 6.494389931 | 10.350900000 |
| Ti | 0.000000000 | 6.494389931 | 7.393500000  |
| Ti | 3.247200000 | 6.494389931 | 8.872200000  |
| Ti | 3.247200000 | 6.494389931 | 5.914800000  |
| Ti | 6.494400000 | 6.494389931 | 4.436100000  |
| Ti | 6.494400000 | 6.494389931 | 1.478700000  |
| Ti | 9.741600000 | 6.494389931 | 2.957400000  |
| Ti | 9.741600000 | 6.494389931 | 0.000000000  |
| Ti | 6.494400000 | 6.494389931 | 10.350900000 |
| Ti | 6.494400000 | 6.494389931 | 7.393500000  |
| Ti | 9.741600000 | 6.494389931 | 8.872200000  |
| Ti | 9.741600000 | 6.494389931 | 5.914800000  |
| Ti | 3.227754078 | 9.749855446 | 1.479395226  |
| Ti | 3.229909569 | 9.746836835 | 4.435768061  |

|    |              |              |              |
|----|--------------|--------------|--------------|
| Ti | -0.019292135 | 9.739745547  | 2.964839517  |
| Ti | -0.017583458 | 9.763950153  | 0.002383073  |
| Ti | 3.235913382  | 9.748124504  | 7.393291681  |
| Ti | 3.232455114  | 9.744424376  | 10.351847433 |
| Ti | -0.013038028 | 9.772362328  | 8.877115672  |
| Ti | -0.016246911 | 9.763592249  | 5.925084654  |
| Ti | 9.725552078  | 9.747965198  | 1.481265012  |
| Ti | 9.723684288  | 9.751275989  | 4.436106506  |
| Ti | 6.475203463  | 9.756811716  | 2.956156827  |
| Ti | 6.477662502  | 9.761328023  | 0.004409365  |
| Ti | 9.724622989  | 9.749397171  | 7.391779621  |
| Ti | 9.727674578  | 9.742605566  | 10.350460530 |
| Ti | 6.480747862  | 9.758603022  | 8.880604694  |
| Ti | 6.478920208  | 9.737053765  | 5.917426408  |
| Ti | -0.036767006 | 13.023685514 | 1.447915714  |
| Ti | -0.037013144 | 13.021711684 | 4.467551831  |
| Ti | 3.210457802  | 13.012787298 | 2.958718882  |
| Ti | 3.210271283  | 13.008936435 | 5.916016201  |
| Ti | 6.457751711  | 13.133018793 | 1.438413233  |
| Ti | 6.456914843  | 13.009696892 | 4.410932053  |
| Ti | 9.705186549  | 13.017993338 | 2.959241041  |
| Ti | 9.705516984  | 13.017021782 | 5.915974679  |



|    |              |              |              |
|----|--------------|--------------|--------------|
| Ti | -0.035743489 | 13.147569275 | 7.446445977  |
| Ti | -0.035958713 | 13.151681957 | 10.302364098 |
| Ti | 3.213331184  | 13.007753780 | 8.873753818  |
| Ti | 3.207975772  | 13.009564375 | 0.001054609  |
| Ti | 6.458516751  | 13.015327274 | 7.425022572  |
| Ti | 6.458865371  | 13.134405047 | 10.396677831 |
| Ti | 9.704818186  | 13.009162179 | 8.872957686  |
| Ti | 9.707392566  | 13.006192861 | 0.001122038  |
| Ti | 9.699062459  | 16.332217637 | 1.486042633  |
| Ti | 9.689249551  | 16.359177962 | 4.449685349  |
| Ti | 6.431382629  | 16.320630402 | 2.943530977  |
| Ti | -0.052691016 | 16.348666225 | 5.940713922  |
| Ti | 3.176310377  | 16.331037125 | 1.481845727  |
| Ti | 3.189138895  | 16.341077372 | 4.443934626  |
| Ti | -0.054616215 | 16.287244949 | 2.962405695  |
| Ti | 6.452832593  | 16.263474686 | 5.921069333  |
| Ti | 3.196771893  | 16.335232319 | 7.399704034  |
| Ti | 3.182615270  | 16.335269824 | 10.352708273 |
| Ti | -0.054469052 | 16.784595229 | 8.870382855  |
| Ti | 6.444547297  | 16.574313343 | 0.010650662  |
| Ti | 9.684930905  | 16.351197272 | 7.401097087  |
| Ti | 9.691977199  | 16.332700558 | 10.353448451 |

|    |              |              |              |
|----|--------------|--------------|--------------|
| Ti | 6.432649426  | 16.331879736 | 8.894102978  |
| Ti | -0.057088504 | 16.355631068 | -0.022043750 |
| Ti | 6.419973137  | 19.600482333 | 7.586503828  |
| Ti | 6.431693321  | 19.966722190 | 10.528849361 |
| Ti | 3.206372565  | 19.595257361 | 8.889810844  |
| Ti | 3.211659526  | 19.596443945 | 0.005916693  |
| Ti | 6.462776818  | 20.064589678 | 1.501916536  |
| Ti | 6.267850909  | 19.500383837 | 4.286434740  |
| Ti | 3.140554548  | 19.581548776 | 2.943756331  |
| Ti | 3.146859702  | 19.590960368 | 5.946025530  |
| Ti | -0.039839767 | 19.619022980 | 1.264679468  |
| Ti | -0.071028084 | 19.644859943 | 4.656697553  |
| Ti | 9.788054833  | 19.585088884 | 2.921272165  |
| Ti | 9.651290043  | 19.643618352 | 5.952779995  |
| Ti | -0.060352719 | 20.146425420 | 7.424160667  |
| Ti | -0.050156381 | 20.133737683 | 10.328779121 |
| Ti | 9.676424669  | 19.597155825 | 8.878546935  |
| Ti | 9.672990950  | 19.594485831 | -0.018060369 |
| O  | 0.000000000  | 1.266689833  | 2.957400000  |
| O  | 0.000000000  | 1.266689833  | 0.000000000  |
| O  | 0.000000000  | 1.266689833  | 8.872200000  |
| O  | 0.000000000  | 1.266689833  | 5.914800000  |

|   |             |             |              |
|---|-------------|-------------|--------------|
| O | 6.494400000 | 1.266689833 | 2.957400000  |
| O | 6.494400000 | 1.266689833 | 0.000000000  |
| O | 6.494400000 | 1.266689833 | 8.872200000  |
| O | 6.494400000 | 1.266689833 | 5.914800000  |
| O | 9.741600000 | 1.980499953 | 8.872200000  |
| O | 9.741600000 | 1.980499953 | 5.914800000  |
| O | 9.741600000 | 1.980499953 | 2.957400000  |
| O | 9.741600000 | 1.980499953 | 0.000000000  |
| O | 3.247200000 | 1.980499953 | 8.872200000  |
| O | 3.247200000 | 1.980499953 | 5.914800000  |
| O | 3.247200000 | 1.980499953 | 2.957400000  |
| O | 3.247200000 | 1.980499953 | 0.000000000  |
| O | 1.266699988 | 3.247190143 | 1.478700000  |
| O | 1.266699988 | 3.247190143 | 4.436100000  |
| O | 5.227599998 | 3.247190143 | 1.478700000  |
| O | 5.227599998 | 3.247190143 | 4.436100000  |
| O | 1.266699988 | 3.247190143 | 7.393500000  |
| O | 1.266699988 | 3.247190143 | 10.350900000 |
| O | 5.227599998 | 3.247190143 | 7.393500000  |
| O | 5.227599998 | 3.247190143 | 10.350900000 |
| O | 7.761099988 | 3.247190143 | 1.478700000  |
| O | 7.761099988 | 3.247190143 | 4.436100000  |

|   |              |             |              |
|---|--------------|-------------|--------------|
| O | 11.721999998 | 3.247190143 | 1.478700000  |
| O | 11.721999998 | 3.247190143 | 4.436100000  |
| O | 7.761099988  | 3.247190143 | 7.393500000  |
| O | 7.761099988  | 3.247190143 | 10.350900000 |
| O | 11.721999998 | 3.247190143 | 7.393500000  |
| O | 11.721999998 | 3.247190143 | 10.350900000 |
| O | 9.741600000  | 4.513899978 | 8.872200000  |
| O | 9.741600000  | 4.513899978 | 5.914800000  |
| O | 9.741600000  | 4.513899978 | 2.957400000  |
| O | 9.741600000  | 4.513899978 | 0.000000000  |
| O | 3.247200000  | 4.513899978 | 8.872200000  |
| O | 3.247200000  | 4.513899978 | 5.914800000  |
| O | 3.247200000  | 4.513899978 | 2.957400000  |
| O | 3.247200000  | 4.513899978 | 0.000000000  |
| O | 0.000000000  | 5.227600085 | 2.957400000  |
| O | 0.000000000  | 5.227600085 | 0.000000000  |
| O | 0.000000000  | 5.227600085 | 8.872200000  |
| O | 0.000000000  | 5.227600085 | 5.914800000  |
| O | 6.494400000  | 5.227600085 | 0.000000000  |
| O | 6.494400000  | 5.227600085 | 2.957400000  |
| O | 6.494400000  | 5.227600085 | 8.872200000  |
| O | 6.494400000  | 5.227600085 | 5.914800000  |

|   |              |             |              |
|---|--------------|-------------|--------------|
| O | 8.474900012  | 6.494389931 | 7.393500000  |
| O | 11.008299988 | 6.494389931 | 7.393500000  |
| O | 8.474900012  | 6.494389931 | 10.350900000 |
| O | 11.008299988 | 6.494389931 | 10.350900000 |
| O | 8.474900012  | 6.494389931 | 1.478700000  |
| O | 11.008299988 | 6.494389931 | 1.478700000  |
| O | 8.474900012  | 6.494389931 | 4.436100000  |
| O | 11.008299988 | 6.494389931 | 4.436100000  |
| O | 1.980500012  | 6.494389931 | 1.478700000  |
| O | 4.513899988  | 6.494389931 | 1.478700000  |
| O | 1.980500012  | 6.494389931 | 4.436100000  |
| O | 4.513899988  | 6.494389931 | 4.436100000  |
| O | 1.980500012  | 6.494389931 | 7.393500000  |
| O | 4.513899988  | 6.494389931 | 7.393500000  |
| O | 1.980500012  | 6.494389931 | 10.350900000 |
| O | 4.513899988  | 6.494389931 | 10.350900000 |
| O | 0.000000000  | 7.761090122 | 8.872200000  |
| O | 0.000000000  | 7.761090122 | 5.914800000  |
| O | 6.494400000  | 7.761090122 | 2.957400000  |
| O | 6.494400000  | 7.761090122 | 0.000000000  |
| O | 0.000000000  | 7.761090122 | 2.957400000  |
| O | 0.000000000  | 7.761090122 | 0.000000000  |

|   |              |             |              |
|---|--------------|-------------|--------------|
| O | 6.494400000  | 7.761090122 | 8.872200000  |
| O | 6.494400000  | 7.761090122 | 5.914800000  |
| O | 3.247200000  | 8.474889884 | 2.957400000  |
| O | 3.247200000  | 8.474889884 | 0.000000000  |
| O | 3.247200000  | 8.474889884 | 8.872200000  |
| O | 3.247200000  | 8.474889884 | 5.914800000  |
| O | 9.741600000  | 8.474889884 | 2.957400000  |
| O | 9.741600000  | 8.474889884 | 0.000000000  |
| O | 9.741600000  | 8.474889884 | 8.872200000  |
| O | 9.741600000  | 8.474889884 | 5.914800000  |
| O | 1.261023753  | 9.788065461 | 1.483129239  |
| O | 1.261463164  | 9.787478955 | 4.436627837  |
| O | 5.207589972  | 9.778412765 | 1.479136749  |
| O | 5.208193822  | 9.780677706 | 4.438773490  |
| O | 1.262942069  | 9.788318709 | 7.395822742  |
| O | 1.262806466  | 9.789993571 | 10.354314259 |
| O | 5.209126547  | 9.780187998 | 7.395743484  |
| O | 5.208418528  | 9.782121824 | 10.354375536 |
| O | 7.756473767  | 9.786978533 | 1.480105948  |
| O | 7.756192300  | 9.787994737 | 4.437627556  |
| O | 11.701694997 | 9.780514113 | 1.482527230  |
| O | 11.702001662 | 9.779331815 | 4.438212057  |

|   |              |              |              |
|---|--------------|--------------|--------------|
| O | 7.757530666  | 9.787778995  | 7.395579170  |
| O | 7.757784987  | 9.788438367  | 10.354809446 |
| O | 11.702985044 | 9.781790709  | 7.396555704  |
| O | 11.702565636 | 9.781794281  | 10.353221441 |
| O | 9.727786411  | 11.084410972 | 2.958348379  |
| O | 9.724673515  | 11.082508936 | 0.002619665  |
| O | 3.232376922  | 11.081433438 | 2.958226534  |
| O | 3.234579173  | 11.081269845 | 0.003121358  |
| O | 3.233137676  | 11.080184703 | 8.872989508  |
| O | 3.232873743  | 11.079928241 | 5.914930007  |
| O | 9.728214002  | 11.082621808 | 8.873449442  |
| O | 9.725683265  | 11.084497412 | 5.915374800  |
| O | 6.461696540  | 11.803297473 | 8.885853961  |
| O | -0.036469043 | 11.807772346 | 2.960755229  |
| O | 6.463960098  | 11.818004404 | 0.005732033  |
| O | 6.462342343  | 11.796777332 | 5.919727383  |
| O | -0.034791280 | 11.804527992 | 0.003348605  |
| O | -0.033283670 | 11.804614075 | 5.915720106  |
| O | 6.459526631  | 11.801272565 | 2.947261796  |
| O | -0.034632297 | 11.810145872 | 8.874076766  |
| O | 8.435833338  | 13.120843981 | 1.487688248  |
| O | 8.431025144  | 13.108568798 | 4.437605671  |

|   |              |              |              |
|---|--------------|--------------|--------------|
| O | 10.979320287 | 13.126150749 | 1.482596907  |
| O | 10.978908282 | 13.129076847 | 4.439839100  |
| O | 1.937214316  | 13.105995604 | 1.484047452  |
| O | 1.937863496  | 13.108895984 | 4.437871364  |
| O | 4.481647499  | 13.133632803 | 1.484378799  |
| O | 4.485386715  | 13.117859304 | 4.438259967  |
| O | 1.943765607  | 13.107658322 | 7.390640904  |
| O | 1.942536997  | 13.102393702 | 10.356318903 |
| O | 4.486590257  | 13.116954185 | 7.394358947  |
| O | 4.483011583  | 13.124445168 | 10.352495576 |
| O | 8.431428317  | 13.108194464 | 7.395313833  |
| O | 8.436324055  | 13.112345723 | 10.349237350 |
| O | 10.974407014 | 13.127983132 | 7.388747458  |
| O | 10.974717446 | 13.125821420 | 10.357911404 |
| O | -0.039362299 | 14.431827842 | 2.960842414  |
| O | -0.036120424 | 14.431283485 | 5.908141828  |
| O | -0.034722959 | 14.396871111 | 8.873655396  |
| O | -0.035239654 | 14.429833652 | 0.013215083  |
| O | 6.447897758  | 14.416980179 | 2.979132986  |
| O | 6.456974202  | 14.410625059 | 5.917124635  |
| O | 6.449634231  | 14.423911446 | 8.865752986  |
| O | 6.466497979  | 14.440112144 | 0.001676136  |



|   |              |              |              |
|---|--------------|--------------|--------------|
| O | 9.682444978  | 15.133336705 | 8.869590863  |
| O | 3.205407497  | 15.125569257 | 8.877550410  |
| O | 9.686460596  | 15.142638640 | 5.919717801  |
| O | 9.696721228  | 15.136906459 | 2.973088179  |
| O | 3.188536345  | 15.128037081 | 2.968970177  |
| O | 9.700599944  | 15.131008542 | 0.003941386  |
| O | 3.169134714  | 15.126968012 | -0.000947078 |
| O | 3.193615355  | 15.127059810 | 5.918603571  |
| O | 1.225828651  | 16.485117349 | 10.332220115 |
| O | 5.161485447  | 16.509914176 | 4.458815198  |
| O | 5.165153874  | 16.493055891 | 7.389078924  |
| O | 7.726095562  | 16.460159788 | 1.486320510  |
| O | 7.715864544  | 16.492247214 | 4.435438134  |
| O | 5.156920404  | 16.470998711 | 10.372145134 |
| O | 11.657732714 | 16.503519408 | 1.483341698  |
| O | 11.655591251 | 16.503670499 | 4.444670072  |
| O | 1.222294658  | 16.505092471 | 4.437982089  |
| O | 1.218688837  | 16.510079197 | 1.485952491  |
| O | 5.151471732  | 16.431503884 | 1.466613224  |
| O | 7.715660620  | 16.485963532 | 7.404371639  |
| O | 7.723678866  | 16.471222311 | 10.361651923 |
| O | 1.226650842  | 16.477062364 | 7.416668863  |

|   |              |              |              |
|---|--------------|--------------|--------------|
| O | 11.651326249 | 16.485576695 | 7.409455410  |
| O | 11.654102345 | 16.473220431 | 10.331255766 |
| O | 3.196336639  | 17.768246840 | 8.874407167  |
| O | 3.208627940  | 17.770797175 | 0.011263672  |
| O | 9.683074675  | 17.774001524 | 2.963000606  |
| O | 9.652497481  | 17.815231221 | 5.917938156  |
| O | 3.197283912  | 17.761764560 | 2.957235923  |
| O | 3.171971988  | 17.770057792 | 5.929281205  |
| O | 9.674123574  | 17.772349878 | 8.872855715  |
| O | 9.674554282  | 17.770064578 | 0.001753738  |
| O | 6.456547649  | 18.598203277 | 0.045587020  |
| O | 6.527546249  | 18.663194307 | 5.945216859  |
| O | -0.054309550 | 18.472207454 | -0.117177275 |
| O | 6.380153113  | 18.444921372 | 2.842711082  |
| O | -0.054738960 | 18.493500606 | 6.031097034  |
| O | 6.435756347  | 18.484282967 | 8.980993401  |
| O | -0.061941899 | 18.643906061 | 8.865272231  |
| O | -0.083594748 | 18.759927719 | 2.969907554  |
| O | 1.934603178  | 19.981814885 | 4.442627573  |
| O | 4.434070694  | 20.031085281 | 1.527696429  |
| O | 4.430077936  | 19.963016346 | 4.460566570  |
| O | 1.978143584  | 20.037094998 | 7.421682602  |

|   |              |              |              |
|---|--------------|--------------|--------------|
| O | 1.978648069  | 19.997963790 | 10.354508738 |
| O | 4.497722178  | 19.960406718 | 7.370431215  |
| O | 4.465513331  | 19.994785873 | 10.352535324 |
| O | 8.470605785  | 19.999769742 | 1.512492672  |
| O | 8.402624224  | 20.169184478 | 4.387020527  |
| O | 10.955573903 | 19.974837183 | 1.462267621  |
| O | 10.903227610 | 19.994854096 | 4.460174892  |
| O | 8.367378595  | 20.067416121 | 7.400322840  |
| O | 8.422031180  | 20.037268592 | 10.343416122 |
| O | 10.878821265 | 20.032365449 | 7.384826656  |
| O | 10.906802388 | 19.996455735 | 10.340448075 |
| O | 1.930643672  | 19.957412753 | 1.482737206  |
| O | -0.052942219 | 21.078770296 | 0.081885911  |
| O | 6.596682514  | 21.053138717 | 3.172042177  |
| O | -0.064355348 | 21.100924632 | 5.845791319  |
| O | -0.066769576 | 21.283645401 | 8.877627066  |
| O | 6.420755582  | 21.189052628 | 8.821843404  |
| O | 6.442973704  | 21.212040646 | 0.054088007  |
| H | 0.000000000  | 0.932899949  | 9.814800036  |
| H | 0.816399984  | 0.932899949  | 8.400899982  |
| H | 6.457700016  | 0.932899949  | 6.856699960  |
| H | 0.834099951  | 0.932899949  | -0.439200043 |

|   |              |              |              |
|---|--------------|--------------|--------------|
| H | 0.000000000  | 0.932899949  | 3.900000036  |
| H | 0.816399984  | 0.932899949  | 2.486099982  |
| H | 6.457700016  | 0.932899949  | 0.941899960  |
| H | 0.834099951  | 0.932899949  | 5.475599957  |
| H | 6.494400000  | 0.932899949  | 9.814800036  |
| H | 7.310799984  | 0.932899949  | 8.400899982  |
| H | -0.036699984 | 0.932899949  | 6.856699960  |
| H | 7.328499951  | 0.932899949  | -0.439200043 |
| H | 6.494400000  | 0.932899949  | 3.900000036  |
| H | 7.310799984  | 0.932899949  | 2.486099982  |
| H | -0.036699984 | 0.932899949  | 0.941899960  |
| H | 7.328499951  | 0.932899949  | 5.475599957  |
| H | 7.734872614  | 20.897141456 | 3.771201835  |
| H | 7.248906403  | 21.702150333 | 8.780167013  |

13-Eb:

|    |             |             |              |
|----|-------------|-------------|--------------|
| Ti | 3.247200000 | 3.247194072 | 1.478700000  |
| Ti | 3.247200000 | 3.247194072 | 4.436100000  |
| Ti | 0.000000000 | 3.247194072 | 2.957400000  |
| Ti | 0.000000000 | 3.247194072 | 0.000000000  |
| Ti | 3.247200000 | 3.247194072 | 7.393500000  |
| Ti | 3.247200000 | 3.247194072 | 10.350900000 |
| Ti | 0.000000000 | 3.247194072 | 8.872200000  |

|    |             |             |              |
|----|-------------|-------------|--------------|
| Ti | 0.000000000 | 3.247194072 | 5.914800000  |
| Ti | 9.741600000 | 3.247194072 | 1.478700000  |
| Ti | 9.741600000 | 3.247194072 | 4.436100000  |
| Ti | 6.494400000 | 3.247194072 | 2.957400000  |
| Ti | 6.494400000 | 3.247194072 | 0.000000000  |
| Ti | 9.741600000 | 3.247194072 | 7.393500000  |
| Ti | 9.741600000 | 3.247194072 | 10.350900000 |
| Ti | 6.494400000 | 3.247194072 | 8.872200000  |
| Ti | 6.494400000 | 3.247194072 | 5.914800000  |
| Ti | 0.000000000 | 6.494391717 | 4.436100000  |
| Ti | 0.000000000 | 6.494391717 | 1.478700000  |
| Ti | 3.247200000 | 6.494391717 | 2.957400000  |
| Ti | 3.247200000 | 6.494391717 | 0.000000000  |
| Ti | 0.000000000 | 6.494391717 | 10.350900000 |
| Ti | 0.000000000 | 6.494391717 | 7.393500000  |
| Ti | 3.247200000 | 6.494391717 | 8.872200000  |
| Ti | 3.247200000 | 6.494391717 | 5.914800000  |
| Ti | 6.494400000 | 6.494391717 | 4.436100000  |
| Ti | 6.494400000 | 6.494391717 | 1.478700000  |
| Ti | 9.741600000 | 6.494391717 | 2.957400000  |
| Ti | 9.741600000 | 6.494391717 | 0.000000000  |
| Ti | 6.494400000 | 6.494391717 | 10.350900000 |

|    |              |              |              |
|----|--------------|--------------|--------------|
| Ti | 6.494400000  | 6.494391717  | 7.393500000  |
| Ti | 9.741600000  | 6.494391717  | 8.872200000  |
| Ti | 9.741600000  | 6.494391717  | 5.914800000  |
| Ti | 3.227351685  | 9.748089142  | 1.479518372  |
| Ti | 3.229873590  | 9.745267701  | 4.437139704  |
| Ti | -0.020205507 | 9.737151993  | 2.966063999  |
| Ti | -0.016649953 | 9.763397938  | 0.002633151  |
| Ti | 3.235787391  | 9.747709450  | 7.394366755  |
| Ti | 3.232672157  | 9.743751787  | 10.352554251 |
| Ti | -0.013570438 | 9.768265005  | 8.877988223  |
| Ti | -0.016024283 | 9.763050392  | 5.925932363  |
| Ti | 9.726901354  | 9.746468215  | 1.482671906  |
| Ti | 9.723682470  | 9.751636751  | 4.436422002  |
| Ti | 6.474512329  | 9.757522881  | 2.957526222  |
| Ti | 6.478835781  | 9.762486389  | 0.005843468  |
| Ti | 9.725373871  | 9.748402041  | 7.390225212  |
| Ti | 9.727870968  | 9.738644688  | 10.350499331 |
| Ti | 6.479981393  | 9.757904716  | 8.882119001  |
| Ti | 6.478730831  | 9.737496681  | 5.919161100  |
| Ti | -0.036832990 | 13.016300259 | 1.446558504  |
| Ti | -0.037184337 | 13.016337764 | 4.466859681  |
| Ti | 3.210054110  | 13.008008456 | 2.958273498  |

|    |              |              |              |
|----|--------------|--------------|--------------|
| Ti | 3.210883835  | 13.007432309 | 5.915598498  |
| Ti | 6.456328658  | 13.137368293 | 1.437285162  |
| Ti | 6.456791579  | 13.009655816 | 4.410711549  |
| Ti | 9.705360858  | 13.015580522 | 2.959083470  |
| Ti | 9.704388257  | 13.013576687 | 5.916057605  |
| Ti | -0.035058590 | 13.141730294 | 7.445644877  |
| Ti | -0.038497374 | 13.151450856 | 10.301371949 |
| Ti | 3.213055822  | 13.006794369 | 8.873495223  |
| Ti | 3.208428692  | 13.007645194 | 0.001173260  |
| Ti | 6.457843282  | 13.012715860 | 7.429098934  |
| Ti | 6.458595593  | 13.137334717 | 10.399691777 |
| Ti | 9.704775713  | 13.002909573 | 8.872112461  |
| Ti | 9.706296052  | 12.999349463 | -0.001020894 |
| Ti | 9.694801613  | 16.322240971 | 1.483519497  |
| Ti | 9.688964057  | 16.348409763 | 4.448392256  |
| Ti | 6.431329375  | 16.327835634 | 2.949402836  |
| Ti | -0.056031475 | 16.339630396 | 5.945422931  |
| Ti | 3.174671580  | 16.329576577 | 1.480977198  |
| Ti | 3.183516043  | 16.334640455 | 4.441646899  |
| Ti | -0.057869910 | 16.277174341 | 2.965059075  |
| Ti | 6.447688898  | 16.262387400 | 5.918497933  |
| Ti | 3.195501199  | 16.333179549 | 7.401308246  |

|    |              |              |              |
|----|--------------|--------------|--------------|
| Ti | 3.180179221  | 16.332309078 | 10.353662448 |
| Ti | -0.058292695 | 16.782749987 | 8.872839272  |
| Ti | 6.439718841  | 16.607034780 | 0.012767096  |
| Ti | 9.676269194  | 16.335219460 | 7.400106477  |
| Ti | 9.687435145  | 16.331266798 | 10.352869747 |
| Ti | 6.431404320  | 16.334432928 | 8.895265354  |
| Ti | -0.058180342 | 16.349404179 | -0.021205741 |
| Ti | 6.424182158  | 19.593033498 | 7.575649342  |
| Ti | 6.415985445  | 19.969246092 | 10.529207206 |
| Ti | 3.206066029  | 19.591003946 | 8.889424844  |
| Ti | 3.195244670  | 19.589483389 | 0.006878203  |
| Ti | 6.451555014  | 20.102112103 | 1.522130247  |
| Ti | 6.287524265  | 19.596180697 | 4.258775716  |
| Ti | 3.151644775  | 19.579506365 | 2.950088243  |
| Ti | 3.155678447  | 19.583028970 | 5.940583678  |
| Ti | -0.024097861 | 19.604562868 | 1.263593748  |
| Ti | -0.068912078 | 19.644700637 | 4.657555790  |
| Ti | 9.817105193  | 19.576056984 | 2.884013539  |
| Ti | 9.726380114  | 19.616477646 | 6.016398756  |
| Ti | -0.028195308 | 20.150270924 | 7.430600820  |
| Ti | -0.056362819 | 20.131417021 | 10.330881833 |
| Ti | 9.668097550  | 19.586055439 | 8.903020130  |



|    |             |              |              |
|----|-------------|--------------|--------------|
| Ti | 9.652366554 | 19.591028235 | -0.022541185 |
| O  | 0.000000000 | 1.266694833  | 2.957400000  |
| O  | 0.000000000 | 1.266694833  | 0.000000000  |
| O  | 0.000000000 | 1.266694833  | 8.872200000  |
| O  | 0.000000000 | 1.266694833  | 5.914800000  |
| O  | 6.494400000 | 1.266694833  | 2.957400000  |
| O  | 6.494400000 | 1.266694833  | 0.000000000  |
| O  | 6.494400000 | 1.266694833  | 8.872200000  |
| O  | 6.494400000 | 1.266694833  | 5.914800000  |
| O  | 9.741600000 | 1.980495667  | 8.872200000  |
| O  | 9.741600000 | 1.980495667  | 5.914800000  |
| O  | 9.741600000 | 1.980495667  | 2.957400000  |
| O  | 9.741600000 | 1.980495667  | 0.000000000  |
| O  | 3.247200000 | 1.980495667  | 8.872200000  |
| O  | 3.247200000 | 1.980495667  | 5.914800000  |
| O  | 3.247200000 | 1.980495667  | 2.957400000  |
| O  | 3.247200000 | 1.980495667  | 0.000000000  |
| O  | 1.266698949 | 3.247194072  | 1.478700000  |
| O  | 1.266698949 | 3.247194072  | 4.436100000  |
| O  | 5.227599738 | 3.247194072  | 1.478700000  |
| O  | 5.227599738 | 3.247194072  | 4.436100000  |
| O  | 1.266698949 | 3.247194072  | 7.393500000  |

|   |              |             |              |
|---|--------------|-------------|--------------|
| O | 1.266698949  | 3.247194072 | 10.350900000 |
| O | 5.227599738  | 3.247194072 | 7.393500000  |
| O | 5.227599738  | 3.247194072 | 10.350900000 |
| O | 7.761098949  | 3.247194072 | 1.478700000  |
| O | 7.761098949  | 3.247194072 | 4.436100000  |
| O | 11.721999738 | 3.247194072 | 1.478700000  |
| O | 11.721999738 | 3.247194072 | 4.436100000  |
| O | 7.761098949  | 3.247194072 | 7.393500000  |
| O | 7.761098949  | 3.247194072 | 10.350900000 |
| O | 11.721999738 | 3.247194072 | 7.393500000  |
| O | 11.721999738 | 3.247194072 | 10.350900000 |
| O | 9.741600000  | 4.513896049 | 8.872200000  |
| O | 9.741600000  | 4.513896049 | 5.914800000  |
| O | 9.741600000  | 4.513896049 | 2.957400000  |
| O | 9.741600000  | 4.513896049 | 0.000000000  |
| O | 3.247200000  | 4.513896049 | 8.872200000  |
| O | 3.247200000  | 4.513896049 | 5.914800000  |
| O | 3.247200000  | 4.513896049 | 2.957400000  |
| O | 3.247200000  | 4.513896049 | 0.000000000  |
| O | 0.000000000  | 5.227596870 | 2.957400000  |
| O | 0.000000000  | 5.227596870 | 0.000000000  |
| O | 0.000000000  | 5.227596870 | 8.872200000  |

|   |              |             |              |
|---|--------------|-------------|--------------|
| O | 0.000000000  | 5.227596870 | 5.914800000  |
| O | 6.494400000  | 5.227596870 | 0.000000000  |
| O | 6.494400000  | 5.227596870 | 2.957400000  |
| O | 6.494400000  | 5.227596870 | 8.872200000  |
| O | 6.494400000  | 5.227596870 | 5.914800000  |
| O | 8.474899752  | 6.494391717 | 7.393500000  |
| O | 11.008298949 | 6.494391717 | 7.393500000  |
| O | 8.474899752  | 6.494391717 | 10.350900000 |
| O | 11.008298949 | 6.494391717 | 10.350900000 |
| O | 8.474899752  | 6.494391717 | 1.478700000  |
| O | 11.008298949 | 6.494391717 | 1.478700000  |
| O | 8.474899752  | 6.494391717 | 4.436100000  |
| O | 11.008298949 | 6.494391717 | 4.436100000  |
| O | 1.980499752  | 6.494391717 | 1.478700000  |
| O | 4.513898949  | 6.494391717 | 1.478700000  |
| O | 1.980499752  | 6.494391717 | 4.436100000  |
| O | 4.513898949  | 6.494391717 | 4.436100000  |
| O | 1.980499752  | 6.494391717 | 7.393500000  |
| O | 4.513898949  | 6.494391717 | 7.393500000  |
| O | 1.980499752  | 6.494391717 | 10.350900000 |
| O | 4.513898949  | 6.494391717 | 10.350900000 |
| O | 0.000000000  | 7.761086550 | 8.872200000  |

|   |             |             |              |
|---|-------------|-------------|--------------|
| O | 0.000000000 | 7.761086550 | 5.914800000  |
| O | 6.494400000 | 7.761086550 | 2.957400000  |
| O | 6.494400000 | 7.761086550 | 0.000000000  |
| O | 0.000000000 | 7.761086550 | 2.957400000  |
| O | 0.000000000 | 7.761086550 | 0.000000000  |
| O | 6.494400000 | 7.761086550 | 8.872200000  |
| O | 6.494400000 | 7.761086550 | 5.914800000  |
| O | 3.247200000 | 8.474887384 | 2.957400000  |
| O | 3.247200000 | 8.474887384 | 0.000000000  |
| O | 3.247200000 | 8.474887384 | 8.872200000  |
| O | 3.247200000 | 8.474887384 | 5.914800000  |
| O | 9.741600000 | 8.474887384 | 2.957400000  |
| O | 9.741600000 | 8.474887384 | 0.000000000  |
| O | 9.741600000 | 8.474887384 | 8.872200000  |
| O | 9.741600000 | 8.474887384 | 5.914800000  |
| O | 1.261450695 | 9.786192001 | 1.483791223  |
| O | 1.261753983 | 9.785360820 | 4.437374403  |
| O | 5.207249796 | 9.777906270 | 1.479853031  |
| O | 5.207777920 | 9.778420624 | 4.439629006  |
| O | 1.263377843 | 9.787069616 | 7.396509214  |
| O | 1.263172880 | 9.787410732 | 10.354190995 |
| O | 5.208718569 | 9.778406693 | 7.396621358  |

|   |              |              |              |
|---|--------------|--------------|--------------|
| O | 5.208351376  | 9.780266580  | 10.355379870 |
| O | 7.756282053  | 9.786477395  | 1.481258742  |
| O | 7.755937849  | 9.787566824  | 4.438276883  |
| O | 11.701392487 | 9.777217609  | 1.482409408  |
| O | 11.701860734 | 9.777731962  | 4.439510592  |
| O | 7.757057484  | 9.787147483  | 7.396351643  |
| O | 7.757464813  | 9.787859363  | 10.355738306 |
| O | 11.703026349 | 9.779167507  | 7.396873565  |
| O | 11.702384182 | 9.778713162  | 10.353658899 |
| O | 9.728111001  | 11.081120540 | 2.958245343  |
| O | 9.725269701  | 11.079094203 | 0.002872109  |
| O | 3.233521235  | 11.078686649 | 2.959309061  |
| O | 3.234470976  | 11.079424960 | 0.003112486  |
| O | 3.232881017  | 11.078375894 | 8.873602044  |
| O | 3.233731394  | 11.078405184 | 5.915319674  |
| O | 9.729676541  | 11.078581278 | 8.874070615  |
| O | 9.726216455  | 11.081035886 | 5.916228306  |
| O | 6.459545854  | 11.801883002 | 8.886639446  |
| O | -0.037180310 | 11.800886800 | 2.962062519  |
| O | 6.461466768  | 11.817680432 | 0.006411880  |
| O | 6.459472467  | 11.796881988 | 5.919355579  |
| O | -0.034818816 | 11.799066918 | 0.002421637  |

|   |              |              |              |
|---|--------------|--------------|--------------|
| O | -0.033180149 | 11.801135404 | 5.917539735  |
| O | 6.458733924  | 11.802289841 | 2.950779328  |
| O | -0.034304460 | 11.807197271 | 8.874614185  |
| O | 8.434837617  | 13.114069878 | 1.487638209  |
| O | 8.430222047  | 13.102509432 | 4.438457284  |
| O | 10.978634089 | 13.120175322 | 1.482390244  |
| O | 10.978739558 | 13.120252118 | 4.439801600  |
| O | 1.936203658  | 13.099575475 | 1.484733214  |
| O | 1.936874140  | 13.102677311 | 4.438725935  |
| O | 4.480708409  | 13.129728362 | 1.486505288  |
| O | 4.484979126  | 13.118587614 | 4.438858190  |
| O | 1.943059276  | 13.105895948 | 7.390635699  |
| O | 1.941738835  | 13.100712410 | 10.356879981 |
| O | 4.485754298  | 13.114305266 | 7.394346053  |
| O | 4.481940396  | 13.123362883 | 10.352178188 |
| O | 8.430452988  | 13.100157337 | 7.396537013  |
| O | 8.435307552  | 13.106319575 | 10.349645944 |
| O | 10.973957991 | 13.124972023 | 7.389865474  |
| O | 10.974041898 | 13.120978999 | 10.358688964 |
| O | -0.040360618 | 14.424196483 | 2.962250373  |
| O | -0.037394885 | 14.426636446 | 5.907447076  |
| O | -0.036470862 | 14.392483749 | 8.872242705  |

|   |              |              |              |
|---|--------------|--------------|--------------|
| O | -0.036235635 | 14.423739280 | 0.015196659  |
| O | 6.451495915  | 14.422742006 | 2.978773958  |
| O | 6.456797294  | 14.411270501 | 5.918817096  |
| O | 6.450502792  | 14.422260158 | 8.864576887  |
| O | 6.461662639  | 14.432885838 | 0.004586218  |
| O | 9.678319735  | 15.125468172 | 8.875606925  |
| O | 3.204281498  | 15.122198100 | 8.876054439  |
| O | 9.683327827  | 15.128404272 | 5.918923444  |
| O | 9.692219310  | 15.127768117 | 2.972864599  |
| O | 3.185838181  | 15.123869391 | 2.967669986  |
| O | 9.696657323  | 15.125396734 | 0.003712128  |
| O | 3.169335521  | 15.122986061 | 0.003890282  |
| O | 3.189066937  | 15.124593058 | 5.918696315  |
| O | 1.222417272  | 16.471244457 | 10.330401196 |
| O | 5.158767281  | 16.500863702 | 4.454789348  |
| O | 5.162521564  | 16.493547027 | 7.388272973  |
| O | 7.722555075  | 16.463225190 | 1.486869995  |
| O | 7.717057176  | 16.496066287 | 4.439983894  |
| O | 5.154311214  | 16.465636221 | 10.372130820 |
| O | 11.653659297 | 16.494985430 | 1.484120914  |
| O | 11.652412632 | 16.492271860 | 4.445456977  |
| O | 1.219451280  | 16.500771547 | 4.437989424  |

|   |              |              |              |
|---|--------------|--------------|--------------|
| O | 1.216804942  | 16.506262982 | 1.490456138  |
| O | 5.151563693  | 16.446464062 | 1.472908228  |
| O | 7.714089235  | 16.488727823 | 7.398471271  |
| O | 7.720201894  | 16.464695740 | 10.364796823 |
| O | 1.223567561  | 16.476228683 | 7.416519928  |
| O | 11.648345969 | 16.479384811 | 7.411506189  |
| O | 11.650464182 | 16.472809305 | 10.334702084 |
| O | 3.189534924  | 17.763799113 | 8.877101950  |
| O | 3.197477964  | 17.762116035 | 0.008752484  |
| O | 9.679767857  | 17.772197358 | 2.966205954  |
| O | 9.669632826  | 17.797252076 | 5.924869001  |
| O | 3.197681499  | 17.761009819 | 2.961817291  |
| O | 3.171455683  | 17.764768883 | 5.927631922  |
| O | 9.671998736  | 17.761430945 | 8.875688431  |
| O | 9.665522131  | 17.765367533 | 0.006557975  |
| O | 6.454974446  | 18.590712651 | 0.029453456  |
| O | 6.512677709  | 18.707884459 | 5.925610362  |
| O | -0.038996404 | 18.462481177 | -0.121162075 |
| O | 6.405962898  | 18.481245426 | 2.860623344  |
| O | -0.063498087 | 18.492319736 | 6.028690184  |
| O | 6.437294741  | 18.474616698 | 8.970964266  |
| O | -0.050220156 | 18.643018802 | 8.866805466  |



|   |              |              |              |
|---|--------------|--------------|--------------|
| O | -0.107827952 | 18.758005681 | 2.974626027  |
| O | 1.921986897  | 19.969806523 | 4.440363743  |
| O | 4.416648816  | 20.010814763 | 1.500054202  |
| O | 4.412148067  | 19.979766402 | 4.467266856  |
| O | 1.984290793  | 20.041552012 | 7.418095986  |
| O | 1.978295163  | 20.003263414 | 10.349716567 |
| O | 4.493235327  | 19.955290689 | 7.377302793  |
| O | 4.457980477  | 19.987728875 | 10.355215793 |
| O | 8.476338391  | 20.017458135 | 1.530607457  |
| O | 8.373292266  | 20.200590744 | 4.488489513  |
| O | 10.966898838 | 19.958729712 | 1.449788812  |
| O | 10.872838754 | 20.016087241 | 4.457921472  |
| O | 8.390751811  | 20.055334178 | 7.401881153  |
| O | 8.413867979  | 20.040772981 | 10.343664070 |
| O | 10.911408606 | 20.028813197 | 7.430880590  |
| O | 10.911316645 | 19.988577558 | 10.354370923 |
| O | 1.928392193  | 19.950361828 | 1.492213189  |
| O | -0.050772050 | 21.069532298 | 0.088712891  |
| O | 6.451028059  | 21.081242049 | 3.102504594  |
| O | -0.073295019 | 21.099956648 | 5.847424513  |
| O | -0.054534126 | 21.286062862 | 8.882857878  |
| O | 6.422729620  | 21.183833729 | 8.810885882  |

|   |              |              |              |
|---|--------------|--------------|--------------|
| O | 6.446478862  | 21.219851671 | 0.037691117  |
| H | 0.000000000  | 0.932897449  | 9.814799089  |
| H | 0.816399334  | 0.932897449  | 8.400899272  |
| H | 6.457698847  | 0.932897449  | 6.856699960  |
| H | 0.834099172  | 0.932897449  | -0.439201108 |
| H | 0.000000000  | 0.932897449  | 3.899999089  |
| H | 0.816399334  | 0.932897449  | 2.486099272  |
| H | 6.457698847  | 0.932897449  | 0.941899960  |
| H | 0.834099172  | 0.932897449  | 5.475598892  |
| H | 6.494400000  | 0.932897449  | 9.814799089  |
| H | 7.310799334  | 0.932897449  | 8.400899272  |
| H | -0.036701153 | 0.932897449  | 6.856699960  |
| H | 7.328499172  | 0.932897449  | -0.439201108 |
| H | 6.494400000  | 0.932897449  | 3.899999089  |
| H | 7.310799334  | 0.932897449  | 2.486099272  |
| H | -0.036701153 | 0.932897449  | 0.941899960  |
| H | 7.328499172  | 0.932897449  | 5.475598892  |
| H | 8.224568038  | 21.139862958 | 4.244272863  |
| H | 7.252298558  | 21.693495983 | 8.785868999  |

TS13-E2:

|    |             |             |             |
|----|-------------|-------------|-------------|
| Ti | 3.247200000 | 3.247190143 | 1.478700000 |
| Ti | 3.247200000 | 3.247190143 | 4.436100000 |

|    |             |             |              |
|----|-------------|-------------|--------------|
| Ti | 0.000000000 | 3.247190143 | 2.957400000  |
| Ti | 0.000000000 | 3.247190143 | 0.000000000  |
| Ti | 3.247200000 | 3.247190143 | 7.393500000  |
| Ti | 3.247200000 | 3.247190143 | 10.350900000 |
| Ti | 0.000000000 | 3.247190143 | 8.872200000  |
| Ti | 0.000000000 | 3.247190143 | 5.914800000  |
| Ti | 9.741600000 | 3.247190143 | 1.478700000  |
| Ti | 9.741600000 | 3.247190143 | 4.436100000  |
| Ti | 6.494400000 | 3.247190143 | 2.957400000  |
| Ti | 6.494400000 | 3.247190143 | 0.000000000  |
| Ti | 9.741600000 | 3.247190143 | 7.393500000  |
| Ti | 9.741600000 | 3.247190143 | 10.350900000 |
| Ti | 6.494400000 | 3.247190143 | 8.872200000  |
| Ti | 6.494400000 | 3.247190143 | 5.914800000  |
| Ti | 0.000000000 | 6.494389931 | 4.436100000  |
| Ti | 0.000000000 | 6.494389931 | 1.478700000  |
| Ti | 3.247200000 | 6.494389931 | 2.957400000  |
| Ti | 3.247200000 | 6.494389931 | 0.000000000  |
| Ti | 0.000000000 | 6.494389931 | 10.350900000 |
| Ti | 0.000000000 | 6.494389931 | 7.393500000  |
| Ti | 3.247200000 | 6.494389931 | 8.872200000  |
| Ti | 3.247200000 | 6.494389931 | 5.914800000  |

|    |              |             |              |
|----|--------------|-------------|--------------|
| Ti | 6.494400000  | 6.494389931 | 4.436100000  |
| Ti | 6.494400000  | 6.494389931 | 1.478700000  |
| Ti | 9.741600000  | 6.494389931 | 2.957400000  |
| Ti | 9.741600000  | 6.494389931 | 0.000000000  |
| Ti | 6.494400000  | 6.494389931 | 10.350900000 |
| Ti | 6.494400000  | 6.494389931 | 7.393500000  |
| Ti | 9.741600000  | 6.494389931 | 8.872200000  |
| Ti | 9.741600000  | 6.494389931 | 5.914800000  |
| Ti | 3.227485599  | 9.746549297 | 1.479348499  |
| Ti | 3.229403136  | 9.744257925 | 4.437046605  |
| Ti | -0.019990153 | 9.740297405 | 2.964490899  |
| Ti | -0.017263414 | 9.766112222 | 0.001411744  |
| Ti | 3.236358768  | 9.748303813 | 7.393644439  |
| Ti | 3.233658397  | 9.742378393 | 10.350696767 |
| Ti | -0.013256499 | 9.774998032 | 8.876410864  |
| Ti | -0.015932971 | 9.766489415 | 5.924571841  |
| Ti | 9.725655988  | 9.747658372 | 1.481313868  |
| Ti | 9.723355542  | 9.751017384 | 4.436466481  |
| Ti | 6.472607521  | 9.774750142 | 2.957005601  |
| Ti | 6.480151936  | 9.788421222 | 0.006526390  |
| Ti | 9.724597271  | 9.747831609 | 7.390910027  |
| Ti | 9.727536896  | 9.740727819 | 10.350886159 |

|    |              |              |              |
|----|--------------|--------------|--------------|
| Ti | 6.480336896  | 9.761663067  | 8.880415657  |
| Ti | 6.478982035  | 9.753510925  | 5.916235285  |
| Ti | -0.036858448 | 13.023941619 | 1.452260607  |
| Ti | -0.035366164 | 13.028884768 | 4.468064052  |
| Ti | 3.210898252  | 13.007800929 | 2.958277993  |
| Ti | 3.210688223  | 13.008466374 | 5.915714310  |
| Ti | 6.457857440  | 13.190556703 | 1.464127234  |
| Ti | 6.458407516  | 13.064373712 | 4.394462884  |
| Ti | 9.705643495  | 13.017030355 | 2.958449995  |
| Ti | 9.705869630  | 13.016136666 | 5.915788836  |
| Ti | -0.034946496 | 13.149718128 | 7.443678916  |
| Ti | -0.037245514 | 13.148456177 | 10.301778296 |
| Ti | 3.213005166  | 13.008238129 | 8.874202160  |
| Ti | 3.208552085  | 13.005181300 | 0.001000666  |
| Ti | 6.456503487  | 13.021902066 | 7.408949339  |
| Ti | 6.458524934  | 13.121105087 | 10.403466247 |
| Ti | 9.704076656  | 13.005520630 | 8.872528626  |
| Ti | 9.706916787  | 13.006965105 | 0.001469355  |
| Ti | 9.695085029  | 16.346612741 | 1.491185196  |
| Ti | 9.696361438  | 16.353573298 | 4.446629527  |
| Ti | 6.450813484  | 16.474328076 | 2.947551503  |
| Ti | -0.053625300 | 16.359935561 | 5.943802039  |

|    |              |              |              |
|----|--------------|--------------|--------------|
| Ti | 3.186238496  | 16.330550990 | 1.479147750  |
| Ti | 3.187765719  | 16.335832040 | 4.441943822  |
| Ti | -0.048705013 | 16.299092575 | 2.960019073  |
| Ti | 6.444750052  | 16.300747078 | 5.914211596  |
| Ti | 3.197413930  | 16.333410651 | 7.400689085  |
| Ti | 3.186713756  | 16.332393732 | 10.352495458 |
| Ti | -0.049326916 | 16.791506851 | 8.874101135  |
| Ti | 6.444987228  | 16.634525174 | 0.000415810  |
| Ti | 9.685295241  | 16.331928314 | 7.395678894  |
| Ti | 9.693072544  | 16.327917430 | 10.352501136 |
| Ti | 6.439767938  | 16.332358727 | 8.887158056  |
| Ti | -0.057723786 | 16.352675323 | -0.021108620 |
| Ti | 6.440522458  | 19.587049498 | 7.507201502  |
| Ti | 6.442341149  | 19.980234320 | 10.504864137 |
| Ti | 3.220517238  | 19.592123735 | 8.886113857  |
| Ti | 3.195065814  | 19.588309306 | 0.008081983  |
| Ti | 6.454810787  | 20.067543995 | 1.541780159  |
| Ti | 6.227136996  | 19.665604452 | 4.327749145  |
| Ti | 3.119983147  | 19.579739253 | 2.942116157  |
| Ti | 3.136781302  | 19.588657923 | 5.948665779  |
| Ti | -0.083525647 | 19.604010296 | 1.284253079  |
| Ti | -0.071439699 | 19.631636422 | 4.649234850  |

|    |              |              |              |
|----|--------------|--------------|--------------|
| Ti | 9.647941530  | 19.614864220 | 2.999511365  |
| Ti | 9.747962694  | 19.581031565 | 5.929512592  |
| Ti | -0.061324151 | 20.152527649 | 7.428702642  |
| Ti | -0.045164396 | 20.138268278 | 10.337438743 |
| Ti | 9.669888705  | 19.585654672 | 8.875929045  |
| Ti | 9.708489600  | 19.595635982 | 0.016131552  |
| O  | 0.000000000  | 1.266689833  | 2.957400000  |
| O  | 0.000000000  | 1.266689833  | 0.000000000  |
| O  | 0.000000000  | 1.266689833  | 8.872200000  |
| O  | 0.000000000  | 1.266689833  | 5.914800000  |
| O  | 6.494400000  | 1.266689833  | 2.957400000  |
| O  | 6.494400000  | 1.266689833  | 0.000000000  |
| O  | 6.494400000  | 1.266689833  | 8.872200000  |
| O  | 6.494400000  | 1.266689833  | 5.914800000  |
| O  | 9.741600000  | 1.980499953  | 8.872200000  |
| O  | 9.741600000  | 1.980499953  | 5.914800000  |
| O  | 9.741600000  | 1.980499953  | 2.957400000  |
| O  | 9.741600000  | 1.980499953  | 0.000000000  |
| O  | 3.247200000  | 1.980499953  | 8.872200000  |
| O  | 3.247200000  | 1.980499953  | 5.914800000  |
| O  | 3.247200000  | 1.980499953  | 2.957400000  |
| O  | 3.247200000  | 1.980499953  | 0.000000000  |

|   |              |             |              |
|---|--------------|-------------|--------------|
| O | 1.266699988  | 3.247190143 | 1.478700000  |
| O | 1.266699988  | 3.247190143 | 4.436100000  |
| O | 5.227599998  | 3.247190143 | 1.478700000  |
| O | 5.227599998  | 3.247190143 | 4.436100000  |
| O | 1.266699988  | 3.247190143 | 7.393500000  |
| O | 1.266699988  | 3.247190143 | 10.350900000 |
| O | 5.227599998  | 3.247190143 | 7.393500000  |
| O | 5.227599998  | 3.247190143 | 10.350900000 |
| O | 7.761099988  | 3.247190143 | 1.478700000  |
| O | 7.761099988  | 3.247190143 | 4.436100000  |
| O | 11.721999998 | 3.247190143 | 1.478700000  |
| O | 11.721999998 | 3.247190143 | 4.436100000  |
| O | 7.761099988  | 3.247190143 | 7.393500000  |
| O | 7.761099988  | 3.247190143 | 10.350900000 |
| O | 11.721999998 | 3.247190143 | 7.393500000  |
| O | 11.721999998 | 3.247190143 | 10.350900000 |
| O | 9.741600000  | 4.513899978 | 8.872200000  |
| O | 9.741600000  | 4.513899978 | 5.914800000  |
| O | 9.741600000  | 4.513899978 | 2.957400000  |
| O | 9.741600000  | 4.513899978 | 0.000000000  |
| O | 3.247200000  | 4.513899978 | 8.872200000  |
| O | 3.247200000  | 4.513899978 | 5.914800000  |



|   |              |             |              |
|---|--------------|-------------|--------------|
| O | 3.247200000  | 4.513899978 | 2.957400000  |
| O | 3.247200000  | 4.513899978 | 0.000000000  |
| O | 0.000000000  | 5.227600085 | 2.957400000  |
| O | 0.000000000  | 5.227600085 | 0.000000000  |
| O | 0.000000000  | 5.227600085 | 8.872200000  |
| O | 0.000000000  | 5.227600085 | 5.914800000  |
| O | 6.494400000  | 5.227600085 | 0.000000000  |
| O | 6.494400000  | 5.227600085 | 2.957400000  |
| O | 6.494400000  | 5.227600085 | 8.872200000  |
| O | 6.494400000  | 5.227600085 | 5.914800000  |
| O | 8.474900012  | 6.494389931 | 7.393500000  |
| O | 11.008299988 | 6.494389931 | 7.393500000  |
| O | 8.474900012  | 6.494389931 | 10.350900000 |
| O | 11.008299988 | 6.494389931 | 10.350900000 |
| O | 8.474900012  | 6.494389931 | 1.478700000  |
| O | 11.008299988 | 6.494389931 | 1.478700000  |
| O | 8.474900012  | 6.494389931 | 4.436100000  |
| O | 11.008299988 | 6.494389931 | 4.436100000  |
| O | 1.980500012  | 6.494389931 | 1.478700000  |
| O | 4.513899988  | 6.494389931 | 1.478700000  |
| O | 1.980500012  | 6.494389931 | 4.436100000  |
| O | 4.513899988  | 6.494389931 | 4.436100000  |

|   |             |             |              |
|---|-------------|-------------|--------------|
| O | 1.980500012 | 6.494389931 | 7.393500000  |
| O | 4.513899988 | 6.494389931 | 7.393500000  |
| O | 1.980500012 | 6.494389931 | 10.350900000 |
| O | 4.513899988 | 6.494389931 | 10.350900000 |
| O | 0.000000000 | 7.761090122 | 8.872200000  |
| O | 0.000000000 | 7.761090122 | 5.914800000  |
| O | 6.494400000 | 7.761090122 | 2.957400000  |
| O | 6.494400000 | 7.761090122 | 0.000000000  |
| O | 0.000000000 | 7.761090122 | 2.957400000  |
| O | 0.000000000 | 7.761090122 | 0.000000000  |
| O | 6.494400000 | 7.761090122 | 8.872200000  |
| O | 6.494400000 | 7.761090122 | 5.914800000  |
| O | 3.247200000 | 8.474889884 | 2.957400000  |
| O | 3.247200000 | 8.474889884 | 0.000000000  |
| O | 3.247200000 | 8.474889884 | 8.872200000  |
| O | 3.247200000 | 8.474889884 | 5.914800000  |
| O | 9.741600000 | 8.474889884 | 2.957400000  |
| O | 9.741600000 | 8.474889884 | 0.000000000  |
| O | 9.741600000 | 8.474889884 | 8.872200000  |
| O | 9.741600000 | 8.474889884 | 5.914800000  |
| O | 1.261346654 | 9.786401314 | 1.483838305  |
| O | 1.261639422 | 9.785739799 | 4.436119046  |

|   |              |              |              |
|---|--------------|--------------|--------------|
| O | 5.207190177  | 9.780604482  | 1.479664704  |
| O | 5.207231741  | 9.779727938  | 4.438840090  |
| O | 1.263068580  | 9.787433235  | 7.395117106  |
| O | 1.262927911  | 9.788507305  | 10.354196673 |
| O | 5.208672069  | 9.779074638  | 7.394723654  |
| O | 5.208510099  | 9.782564382  | 10.353457441 |
| O | 7.756282962  | 9.788757695  | 1.481868913  |
| O | 7.755726262  | 9.787966877  | 4.437132606  |
| O | 11.701521077 | 9.778841750  | 1.482855502  |
| O | 11.701900090 | 9.778444198  | 4.437717461  |
| O | 7.757269981  | 9.787228565  | 7.394836035  |
| O | 7.757910458  | 9.789205253  | 10.353088949 |
| O | 11.703052846 | 9.780313729  | 7.395760991  |
| O | 11.702636685 | 9.780365522  | 10.353188436 |
| O | 9.727824209  | 11.083225816 | 2.957989351  |
| O | 9.725969538  | 11.080750849 | 0.001959218  |
| O | 3.232059346  | 11.079498541 | 2.958829489  |
| O | 3.233746331  | 11.078429472 | 0.002945334  |
| O | 3.232746713  | 11.078633428 | 8.872561158  |
| O | 3.232773989  | 11.078571634 | 5.914549804  |
| O | 9.728445982  | 11.079553191 | 8.873421288  |
| O | 9.726626771  | 11.080947660 | 5.915241717  |

|   |              |              |              |
|---|--------------|--------------|--------------|
| O | 6.461579770  | 11.803927913 | 8.876631368  |
| O | -0.035516834 | 11.807294069 | 2.961420644  |
| O | 6.461979825  | 11.817407897 | 0.006745711  |
| O | 6.461751872  | 11.805489904 | 5.913811874  |
| O | -0.034932858 | 11.801607251 | 0.006126905  |
| O | -0.033106763 | 11.803378912 | 5.913721377  |
| O | 6.459769002  | 11.812322229 | 2.954950681  |
| O | -0.033824134 | 11.806408239 | 8.873305594  |
| O | 8.438902722  | 13.116954899 | 1.483501280  |
| O | 8.435977124  | 13.109046718 | 4.438454800  |
| O | 10.979285477 | 13.122350607 | 1.483013427  |
| O | 10.979433030 | 13.124466957 | 4.436826574  |
| O | 1.937417331  | 13.103532423 | 1.483545759  |
| O | 1.938162499  | 13.106796066 | 4.436861353  |
| O | 4.477908283  | 13.130131986 | 1.483357314  |
| O | 4.481081707  | 13.121761602 | 4.438806139  |
| O | 1.943165395  | 13.104885458 | 7.390287909  |
| O | 1.942087974  | 13.099202569 | 10.357063340 |
| O | 4.482943132  | 13.119056246 | 7.394034106  |
| O | 4.479401346  | 13.121710523 | 10.350821215 |
| O | 8.434177916  | 13.106717127 | 7.394292228  |
| O | 8.438496562  | 13.110488693 | 10.350832808 |

|   |              |              |              |
|---|--------------|--------------|--------------|
| O | 10.975004628 | 13.122399542 | 7.390841061  |
| O | 10.974939944 | 13.120276764 | 10.357035067 |
| O | -0.037059904 | 14.431863204 | 2.960055154  |
| O | -0.037200703 | 14.428367388 | 5.908855508  |
| O | -0.033283800 | 14.389826972 | 8.874962330  |
| O | -0.037543607 | 14.424686905 | 0.012311774  |
| O | 6.457208260  | 14.432043942 | 2.970804001  |
| O | 6.452473323  | 14.419838768 | 5.918845605  |
| O | 6.454771951  | 14.418431441 | 8.868402698  |
| O | 6.454288897  | 14.422231225 | -0.005784083 |
| O | 9.686464233  | 15.124425893 | 8.877393904  |
| O | 3.195527306  | 15.122101302 | 8.877729273  |
| O | 9.696978666  | 15.124722717 | 5.916835519  |
| O | 9.697335728  | 15.138454520 | 2.963880018  |
| O | 3.188036795  | 15.128802539 | 2.963672409  |
| O | 9.709432328  | 15.137285438 | 0.009307293  |
| O | 3.178534189  | 15.125146344 | 0.001594985  |
| O | 3.189087070  | 15.126501165 | 5.917082048  |
| O | 1.225549392  | 16.475821129 | 10.337630738 |
| O | 5.159745857  | 16.495939841 | 4.440928133  |
| O | 5.159438542  | 16.464222821 | 7.396826365  |
| O | 7.730417975  | 16.448019623 | 1.455414734  |

|   |              |              |              |
|---|--------------|--------------|--------------|
| O | 7.725484699  | 16.469092746 | 4.446959691  |
| O | 5.157535164  | 16.466475974 | 10.358561086 |
| O | 11.659647264 | 16.503020414 | 1.486838883  |
| O | 11.660031213 | 16.493932792 | 4.439694069  |
| O | 1.224695118  | 16.496016637 | 4.442117126  |
| O | 1.224043600  | 16.498084051 | 1.479862140  |
| O | 5.160511677  | 16.464517860 | 1.471217187  |
| O | 7.722788094  | 16.465958049 | 7.396537841  |
| O | 7.726251817  | 16.462660830 | 10.360331267 |
| O | 1.226574987  | 16.474014821 | 7.416036689  |
| O | 11.657759731 | 16.472312097 | 7.419104105  |
| O | 11.658038861 | 16.473082913 | 10.332763330 |
| O | 3.192640805  | 17.763836261 | 8.874298571  |
| O | 3.195537957  | 17.761454520 | 0.002792377  |
| O | 9.654848584  | 17.784375028 | 2.975275827  |
| O | 9.687599713  | 17.750096243 | 5.928616973  |
| O | 3.196515884  | 17.760153992 | 2.960868912  |
| O | 3.173659622  | 17.764657083 | 5.928741538  |
| O | 9.682220532  | 17.759811447 | 8.879211522  |
| O | 9.680351833  | 17.772723142 | 0.000816479  |
| O | 6.449793343  | 18.567545324 | -0.004879237 |
| O | 6.434304979  | 18.574554816 | 5.933650349  |

|   |              |              |              |
|---|--------------|--------------|--------------|
| O | -0.062710316 | 18.466206666 | -0.106409618 |
| O | 6.512670696  | 18.472705019 | 2.873571669  |
| O | -0.057955896 | 18.479876674 | 6.035140391  |
| O | 6.456052127  | 18.474532402 | 8.919310554  |
| O | -0.044822271 | 18.638513211 | 8.878010936  |
| O | -0.031024658 | 18.711370631 | 2.970177033  |
| O | 1.924482435  | 19.975232592 | 4.441254866  |
| O | 4.405503516  | 19.969386825 | 1.499846238  |
| O | 4.363052221  | 20.002983735 | 4.469195554  |
| O | 1.986425113  | 20.026351802 | 7.431097071  |
| O | 1.984635905  | 19.997247625 | 10.348191731 |
| O | 4.480368362  | 19.957344530 | 7.376563917  |
| O | 4.457048141  | 19.973291623 | 10.356327184 |
| O | 8.474991453  | 20.025956036 | 1.479713324  |
| O | 8.483097893  | 20.108022879 | 4.583098277  |
| O | 10.941690954 | 19.938631717 | 1.521921218  |
| O | 10.980259247 | 19.988139286 | 4.416609788  |
| O | 8.422374993  | 19.995618482 | 7.382525680  |
| O | 8.445491160  | 20.016439787 | 10.354817017 |
| O | 10.923965918 | 20.026465031 | 7.447848140  |
| O | 10.908769931 | 19.986590512 | 10.349385811 |
| O | 1.921300698  | 19.954442006 | 1.479969553  |

|   |              |              |              |
|---|--------------|--------------|--------------|
| O | -0.060108140 | 21.069305125 | 0.094481477  |
| O | 6.405428798  | 21.066282585 | 3.059677302  |
| O | -0.039645714 | 21.092619614 | 5.854220027  |
| O | -0.046235582 | 21.286168590 | 8.891558076  |
| O | 6.438474384  | 21.165928522 | 8.809125401  |
| O | 6.441479862  | 21.188081072 | 0.027367661  |
| H | 0.000000000  | 0.932899949  | 9.814800036  |
| H | 0.816399984  | 0.932899949  | 8.400899982  |
| H | 6.457700016  | 0.932899949  | 6.856699960  |
| H | 0.834099951  | 0.932899949  | -0.439200043 |
| H | 0.000000000  | 0.932899949  | 3.900000036  |
| H | 0.816399984  | 0.932899949  | 2.486099982  |
| H | 6.457700016  | 0.932899949  | 0.941899960  |
| H | 0.834099951  | 0.932899949  | 5.475599957  |
| H | 6.494400000  | 0.932899949  | 9.814800036  |
| H | 7.310799984  | 0.932899949  | 8.400899982  |
| H | -0.036699984 | 0.932899949  | 6.856699960  |
| H | 7.328499951  | 0.932899949  | -0.439200043 |
| H | 6.494400000  | 0.932899949  | 3.900000036  |
| H | 7.310799984  | 0.932899949  | 2.486099982  |
| H | -0.036699984 | 0.932899949  | 0.941899960  |
| H | 7.328499951  | 0.932899949  | 5.475599957  |



|   |             |              |             |
|---|-------------|--------------|-------------|
| H | 7.495041176 | 20.739303239 | 5.133319826 |
|---|-------------|--------------|-------------|

|   |             |              |             |
|---|-------------|--------------|-------------|
| H | 7.231347624 | 21.731615629 | 8.775722396 |
|---|-------------|--------------|-------------|

13-Ec:

|    |             |             |             |
|----|-------------|-------------|-------------|
| Ti | 3.247200000 | 3.247194072 | 1.478700000 |
|----|-------------|-------------|-------------|

|    |             |             |             |
|----|-------------|-------------|-------------|
| Ti | 3.247200000 | 3.247194072 | 4.436100000 |
|----|-------------|-------------|-------------|

|    |             |             |             |
|----|-------------|-------------|-------------|
| Ti | 0.000000000 | 3.247194072 | 2.957400000 |
|----|-------------|-------------|-------------|

|    |             |             |             |
|----|-------------|-------------|-------------|
| Ti | 0.000000000 | 3.247194072 | 0.000000000 |
|----|-------------|-------------|-------------|

|    |             |             |             |
|----|-------------|-------------|-------------|
| Ti | 3.247200000 | 3.247194072 | 7.393500000 |
|----|-------------|-------------|-------------|

|    |             |             |              |
|----|-------------|-------------|--------------|
| Ti | 3.247200000 | 3.247194072 | 10.350900000 |
|----|-------------|-------------|--------------|

|    |             |             |             |
|----|-------------|-------------|-------------|
| Ti | 0.000000000 | 3.247194072 | 8.872200000 |
|----|-------------|-------------|-------------|

|    |             |             |             |
|----|-------------|-------------|-------------|
| Ti | 0.000000000 | 3.247194072 | 5.914800000 |
|----|-------------|-------------|-------------|

|    |             |             |             |
|----|-------------|-------------|-------------|
| Ti | 9.741600000 | 3.247194072 | 1.478700000 |
|----|-------------|-------------|-------------|

|    |             |             |             |
|----|-------------|-------------|-------------|
| Ti | 9.741600000 | 3.247194072 | 4.436100000 |
|----|-------------|-------------|-------------|

|    |             |             |             |
|----|-------------|-------------|-------------|
| Ti | 6.494400000 | 3.247194072 | 2.957400000 |
|----|-------------|-------------|-------------|

|    |             |             |             |
|----|-------------|-------------|-------------|
| Ti | 6.494400000 | 3.247194072 | 0.000000000 |
|----|-------------|-------------|-------------|

|    |             |             |             |
|----|-------------|-------------|-------------|
| Ti | 9.741600000 | 3.247194072 | 7.393500000 |
|----|-------------|-------------|-------------|

|    |             |             |              |
|----|-------------|-------------|--------------|
| Ti | 9.741600000 | 3.247194072 | 10.350900000 |
|----|-------------|-------------|--------------|

|    |             |             |             |
|----|-------------|-------------|-------------|
| Ti | 6.494400000 | 3.247194072 | 8.872200000 |
|----|-------------|-------------|-------------|

|    |             |             |             |
|----|-------------|-------------|-------------|
| Ti | 6.494400000 | 3.247194072 | 5.914800000 |
|----|-------------|-------------|-------------|

|    |             |             |             |
|----|-------------|-------------|-------------|
| Ti | 0.000000000 | 6.494391717 | 4.436100000 |
|----|-------------|-------------|-------------|

|    |             |             |             |
|----|-------------|-------------|-------------|
| Ti | 0.000000000 | 6.494391717 | 1.478700000 |
|----|-------------|-------------|-------------|

|    |             |             |             |
|----|-------------|-------------|-------------|
| Ti | 3.247200000 | 6.494391717 | 2.957400000 |
|----|-------------|-------------|-------------|

|    |              |             |              |
|----|--------------|-------------|--------------|
| Ti | 3.247200000  | 6.494391717 | 0.000000000  |
| Ti | 0.000000000  | 6.494391717 | 10.350900000 |
| Ti | 0.000000000  | 6.494391717 | 7.393500000  |
| Ti | 3.247200000  | 6.494391717 | 8.872200000  |
| Ti | 3.247200000  | 6.494391717 | 5.914800000  |
| Ti | 6.494400000  | 6.494391717 | 4.436100000  |
| Ti | 6.494400000  | 6.494391717 | 1.478700000  |
| Ti | 9.741600000  | 6.494391717 | 2.957400000  |
| Ti | 9.741600000  | 6.494391717 | 0.000000000  |
| Ti | 6.494400000  | 6.494391717 | 10.350900000 |
| Ti | 6.494400000  | 6.494391717 | 7.393500000  |
| Ti | 9.741600000  | 6.494391717 | 8.872200000  |
| Ti | 9.741600000  | 6.494391717 | 5.914800000  |
| Ti | 3.231623441  | 9.743187785 | 1.480391515  |
| Ti | 3.233917263  | 9.742443401 | 4.437873849  |
| Ti | -0.014330413 | 9.736885886 | 2.971053606  |
| Ti | -0.014764369 | 9.764685249 | 0.006277850  |
| Ti | 3.236721805  | 9.747899832 | 7.394070187  |
| Ti | 3.234199770  | 9.738648260 | 10.350506784 |
| Ti | -0.016510713 | 9.768033189 | 8.882905788  |
| Ti | -0.013803198 | 9.767400249 | 5.930532777  |
| Ti | 9.728169841  | 9.743017048 | 1.480942301  |

|    |              |              |              |
|----|--------------|--------------|--------------|
| Ti | 9.726951231  | 9.743901093  | 4.437734023  |
| Ti | 6.485277057  | 9.790807249  | 2.960747659  |
| Ti | 6.473120839  | 9.801543659  | 0.009848970  |
| Ti | 9.722227335  | 9.745786697  | 7.393039829  |
| Ti | 9.723760663  | 9.739210834  | 10.350847240 |
| Ti | 6.484320302  | 9.771353267  | 8.882122432  |
| Ti | 6.474645724  | 9.766243311  | 5.917752550  |
| Ti | -0.036411503 | 13.017462197 | 1.453275942  |
| Ti | -0.036273302 | 13.023559426 | 4.465208505  |
| Ti | 3.210543658  | 13.003895417 | 2.958009461  |
| Ti | 3.211503141  | 13.005969975 | 5.915916833  |
| Ti | 6.457735735  | 13.181637675 | 1.488026930  |
| Ti | 6.458880568  | 13.103004854 | 4.415088501  |
| Ti | 9.705045101  | 13.005252380 | 2.958603544  |
| Ti | 9.705987958  | 13.005798881 | 5.916180396  |
| Ti | -0.034695163 | 13.137638686 | 7.446945305  |
| Ti | -0.035047679 | 13.145173960 | 10.302037955 |
| Ti | 3.212659663  | 13.004369765 | 8.874249123  |
| Ti | 3.210622630  | 12.998444344 | 0.000157452  |
| Ti | 6.456586356  | 13.044169989 | 7.410698109  |
| Ti | 6.459136447  | 13.128343894 | 10.398024395 |
| Ti | 9.704700248  | 13.002782771 | 8.872359463  |

|    |              |              |              |
|----|--------------|--------------|--------------|
| Ti | 9.706903668  | 12.998347546 | 0.000794476  |
| Ti | 9.692371928  | 16.328031017 | 1.485766766  |
| Ti | 9.703924297  | 16.327199479 | 4.444770150  |
| Ti | 6.438404504  | 16.528875593 | 2.965173112  |
| Ti | -0.045185437 | 16.338404521 | 5.951494118  |
| Ti | 3.182341986  | 16.325062055 | 1.484183729  |
| Ti | 3.187230451  | 16.325780721 | 4.445247120  |
| Ti | -0.051966240 | 16.290796844 | 2.962614133  |
| Ti | 6.452626331  | 16.350377164 | 5.915322040  |
| Ti | 3.199796855  | 16.325094917 | 7.401717077  |
| Ti | 3.183456685  | 16.320227135 | 10.354751481 |
| Ti | -0.061493395 | 16.771487795 | 8.878908684  |
| Ti | 6.438251885  | 16.578797860 | 0.012806607  |
| Ti | 9.684434862  | 16.323535426 | 7.401853945  |
| Ti | 9.684907135  | 16.319047337 | 10.356014882 |
| Ti | 6.435767128  | 16.373674508 | 8.889919203  |
| Ti | -0.056828078 | 16.341952487 | -0.019317855 |
| Ti | 6.418896106  | 19.575135791 | 7.402739036  |
| Ti | 6.414668901  | 19.901928685 | 10.444177816 |
| Ti | 3.192082807  | 19.575021133 | 8.875864100  |
| Ti | 3.166464866  | 19.577812571 | 0.010124600  |
| Ti | 6.428909172  | 20.026526825 | 1.498274676  |

|    |              |              |              |
|----|--------------|--------------|--------------|
| Ti | 6.433012463  | 19.842979162 | 4.359751170  |
| Ti | 3.175168791  | 19.572702972 | 2.966124093  |
| Ti | 3.175413500  | 19.576797081 | 5.918923325  |
| Ti | -0.069206664 | 19.599311822 | 1.281201043  |
| Ti | -0.064020626 | 19.599664368 | 4.650147740  |
| Ti | 9.694453773  | 19.575433688 | 2.965628788  |
| Ti | 9.677234002  | 19.578919145 | 5.921059515  |
| Ti | -0.065183384 | 20.124935099 | 7.422748331  |
| Ti | -0.063758642 | 20.122855540 | 10.333277090 |
| Ti | 9.676120732  | 19.571408874 | 8.876146355  |
| Ti | 9.679037756  | 19.581716298 | 0.003686458  |
| O  | 0.000000000  | 1.266694833  | 2.957400000  |
| O  | 0.000000000  | 1.266694833  | 0.000000000  |
| O  | 0.000000000  | 1.266694833  | 8.872200000  |
| O  | 0.000000000  | 1.266694833  | 5.914800000  |
| O  | 6.494400000  | 1.266694833  | 2.957400000  |
| O  | 6.494400000  | 1.266694833  | 0.000000000  |
| O  | 6.494400000  | 1.266694833  | 8.872200000  |
| O  | 6.494400000  | 1.266694833  | 5.914800000  |
| O  | 9.741600000  | 1.980495667  | 8.872200000  |
| O  | 9.741600000  | 1.980495667  | 5.914800000  |
| O  | 9.741600000  | 1.980495667  | 2.957400000  |

|   |              |             |              |
|---|--------------|-------------|--------------|
| O | 9.741600000  | 1.980495667 | 0.000000000  |
| O | 3.247200000  | 1.980495667 | 8.872200000  |
| O | 3.247200000  | 1.980495667 | 5.914800000  |
| O | 3.247200000  | 1.980495667 | 2.957400000  |
| O | 3.247200000  | 1.980495667 | 0.000000000  |
| O | 1.266698949  | 3.247194072 | 1.478700000  |
| O | 1.266698949  | 3.247194072 | 4.436100000  |
| O | 5.227599738  | 3.247194072 | 1.478700000  |
| O | 5.227599738  | 3.247194072 | 4.436100000  |
| O | 1.266698949  | 3.247194072 | 7.393500000  |
| O | 1.266698949  | 3.247194072 | 10.350900000 |
| O | 5.227599738  | 3.247194072 | 7.393500000  |
| O | 5.227599738  | 3.247194072 | 10.350900000 |
| O | 7.761098949  | 3.247194072 | 1.478700000  |
| O | 7.761098949  | 3.247194072 | 4.436100000  |
| O | 11.721999738 | 3.247194072 | 1.478700000  |
| O | 11.721999738 | 3.247194072 | 4.436100000  |
| O | 7.761098949  | 3.247194072 | 7.393500000  |
| O | 7.761098949  | 3.247194072 | 10.350900000 |
| O | 11.721999738 | 3.247194072 | 7.393500000  |
| O | 11.721999738 | 3.247194072 | 10.350900000 |
| O | 9.741600000  | 4.513896049 | 8.872200000  |

|   |              |             |              |
|---|--------------|-------------|--------------|
| O | 9.741600000  | 4.513896049 | 5.914800000  |
| O | 9.741600000  | 4.513896049 | 2.957400000  |
| O | 9.741600000  | 4.513896049 | 0.000000000  |
| O | 3.247200000  | 4.513896049 | 8.872200000  |
| O | 3.247200000  | 4.513896049 | 5.914800000  |
| O | 3.247200000  | 4.513896049 | 2.957400000  |
| O | 3.247200000  | 4.513896049 | 0.000000000  |
| O | 0.000000000  | 5.227596870 | 2.957400000  |
| O | 0.000000000  | 5.227596870 | 0.000000000  |
| O | 0.000000000  | 5.227596870 | 8.872200000  |
| O | 0.000000000  | 5.227596870 | 5.914800000  |
| O | 6.494400000  | 5.227596870 | 0.000000000  |
| O | 6.494400000  | 5.227596870 | 2.957400000  |
| O | 6.494400000  | 5.227596870 | 8.872200000  |
| O | 6.494400000  | 5.227596870 | 5.914800000  |
| O | 8.474899752  | 6.494391717 | 7.393500000  |
| O | 11.008298949 | 6.494391717 | 7.393500000  |
| O | 8.474899752  | 6.494391717 | 10.350900000 |
| O | 11.008298949 | 6.494391717 | 10.350900000 |
| O | 8.474899752  | 6.494391717 | 1.478700000  |
| O | 11.008298949 | 6.494391717 | 1.478700000  |
| O | 8.474899752  | 6.494391717 | 4.436100000  |

|   |              |             |              |
|---|--------------|-------------|--------------|
| O | 11.008298949 | 6.494391717 | 4.436100000  |
| O | 1.980499752  | 6.494391717 | 1.478700000  |
| O | 4.513898949  | 6.494391717 | 1.478700000  |
| O | 1.980499752  | 6.494391717 | 4.436100000  |
| O | 4.513898949  | 6.494391717 | 4.436100000  |
| O | 1.980499752  | 6.494391717 | 7.393500000  |
| O | 4.513898949  | 6.494391717 | 7.393500000  |
| O | 1.980499752  | 6.494391717 | 10.350900000 |
| O | 4.513898949  | 6.494391717 | 10.350900000 |
| O | 0.000000000  | 7.761086550 | 8.872200000  |
| O | 0.000000000  | 7.761086550 | 5.914800000  |
| O | 6.494400000  | 7.761086550 | 2.957400000  |
| O | 6.494400000  | 7.761086550 | 0.000000000  |
| O | 0.000000000  | 7.761086550 | 2.957400000  |
| O | 0.000000000  | 7.761086550 | 0.000000000  |
| O | 6.494400000  | 7.761086550 | 8.872200000  |
| O | 6.494400000  | 7.761086550 | 5.914800000  |
| O | 3.247200000  | 8.474887384 | 2.957400000  |
| O | 3.247200000  | 8.474887384 | 0.000000000  |
| O | 3.247200000  | 8.474887384 | 8.872200000  |
| O | 3.247200000  | 8.474887384 | 5.914800000  |
| O | 9.741600000  | 8.474887384 | 2.957400000  |



|   |              |              |              |
|---|--------------|--------------|--------------|
| O | 9.741600000  | 8.474887384  | 0.000000000  |
| O | 9.741600000  | 8.474887384  | 8.872200000  |
| O | 9.741600000  | 8.474887384  | 5.914800000  |
| O | 1.263329395  | 9.782458654  | 1.485465112  |
| O | 1.263897525  | 9.783000510  | 4.438522465  |
| O | 5.208490746  | 9.781828928  | 1.484495439  |
| O | 5.209317742  | 9.778220240  | 4.438022901  |
| O | 1.263548126  | 9.785828024  | 7.398248047  |
| O | 1.263550724  | 9.784675373  | 10.354500694 |
| O | 5.208739481  | 9.777418349  | 7.398038781  |
| O | 5.208319034  | 9.779860813  | 10.352705788 |
| O | 7.758658094  | 9.789832121  | 1.480755748  |
| O | 7.758536778  | 9.785853385  | 4.441201752  |
| O | 11.703677997 | 9.774298297  | 1.485513376  |
| O | 11.703647343 | 9.774191140  | 4.439033859  |
| O | 7.758076975  | 9.785838740  | 7.395378186  |
| O | 7.758385329  | 9.787852219  | 10.355687321 |
| O | 11.703099216 | 9.777673383  | 7.397817449  |
| O | 11.703281838 | 9.775598110  | 10.355201124 |
| O | 9.730247009  | 11.075801628 | 2.959725936  |
| O | 9.730584458  | 11.074018894 | 0.002044037  |
| O | 3.234247569  | 11.076140243 | 2.959842931  |

|   |              |              |             |
|---|--------------|--------------|-------------|
| O | 3.234419800  | 11.073797436 | 0.002930310 |
| O | 3.232980381  | 11.075631962 | 8.874447742 |
| O | 3.234972733  | 11.074435377 | 5.914863880 |
| O | 9.730863588  | 11.075508732 | 8.874269589 |
| O | 9.729865918  | 11.075179760 | 5.915512970 |
| O | 6.462105297  | 11.804843033 | 8.879686717 |
| O | -0.033596570 | 11.800185636 | 2.963153799 |
| O | 6.461133735  | 11.814871850 | 0.005073242 |
| O | 6.461376106  | 11.805407036 | 5.917674593 |
| O | -0.033167940 | 11.795971869 | 0.005628287 |
| O | -0.032406147 | 11.797172384 | 5.916441594 |
| O | 6.462870078  | 11.813876719 | 2.963775563 |
| O | -0.034043255 | 11.802004089 | 8.877572058 |
| O | 8.441999511  | 13.104616851 | 1.484112633 |
| O | 8.441734540  | 13.105681991 | 4.440771509 |
| O | 10.981431486 | 13.110246876 | 1.483617446 |
| O | 10.982091317 | 13.111843157 | 4.438865287 |
| O | 1.936976491  | 13.092364886 | 1.484153564 |
| O | 1.937857522  | 13.094683405 | 4.437936309 |
| O | 4.477445103  | 13.123777580 | 1.483551556 |
| O | 4.479092082  | 13.124900228 | 4.440026244 |
| O | 1.942676237  | 13.094224059 | 7.392330881 |

|   |              |              |              |
|---|--------------|--------------|--------------|
| O | 1.943011477  | 13.094294068 | 10.359241879 |
| O | 4.480715293  | 13.115635083 | 7.395872781  |
| O | 4.479024151  | 13.119698831 | 10.353766904 |
| O | 8.439166134  | 13.098951108 | 7.396671397  |
| O | 8.440869096  | 13.102514075 | 10.352657524 |
| O | 10.976853714 | 13.114836764 | 7.392700674  |
| O | 10.976806045 | 13.114719249 | 10.359423345 |
| O | -0.035794535 | 14.419319772 | 2.962223046  |
| O | -0.032282493 | 14.415307102 | 5.911603051  |
| O | -0.032412511 | 14.385702859 | 8.874925303  |
| O | -0.034312253 | 14.414745957 | 0.015195949  |
| O | 6.459361023  | 14.425905279 | 2.968247743  |
| O | 6.463986335  | 14.417613119 | 5.926508110  |
| O | 6.456046671  | 14.420673878 | 8.874485124  |
| O | 6.462152187  | 14.426024937 | 0.003949785  |
| O | 9.685655680  | 15.114519592 | 8.879032422  |
| O | 3.189732613  | 15.113618046 | 8.879020829  |
| O | 9.700025449  | 15.116860614 | 5.921959629  |
| O | 9.701600211  | 15.120573959 | 2.962168630  |
| O | 3.177081912  | 15.120063892 | 2.961792449  |
| O | 9.698310148  | 15.120621108 | 0.009967029  |
| O | 3.173553634  | 15.119326652 | 0.009489823  |

|   |              |              |              |
|---|--------------|--------------|--------------|
| O | 3.175940586  | 15.115704391 | 5.923644755  |
| O | 1.219746385  | 16.466441327 | 10.338015791 |
| O | 5.154654118  | 16.438275487 | 4.446860322  |
| O | 5.154614762  | 16.445483219 | 7.397233540  |
| O | 7.725088151  | 16.468365865 | 1.485219529  |
| O | 7.731720102  | 16.450442084 | 4.438099557  |
| O | 5.151108046  | 16.445852553 | 10.369245107 |
| O | 11.658900278 | 16.480020252 | 1.484780769  |
| O | 11.663451813 | 16.476489074 | 4.445317979  |
| O | 1.221066957  | 16.487537310 | 4.442237315  |
| O | 1.219991354  | 16.492716204 | 1.485412943  |
| O | 5.154467339  | 16.456368219 | 1.482901519  |
| O | 7.728097785  | 16.456728980 | 7.407048914  |
| O | 7.725324677  | 16.460759152 | 10.363101168 |
| O | 1.222457408  | 16.466373103 | 7.423795842  |
| O | 11.657211474 | 16.452430202 | 7.417956752  |
| O | 11.654278343 | 16.454424035 | 10.340270631 |
| O | 3.181194036  | 17.747556267 | 8.880308008  |
| O | 3.182985971  | 17.751481425 | 0.005376435  |
| O | 9.681194027  | 17.751162812 | 2.969107164  |
| O | 9.691785744  | 17.750299484 | 5.923395979  |
| O | 3.203322275  | 17.749775130 | 2.970109722  |

|   |              |              |              |
|---|--------------|--------------|--------------|
| O | 3.181129611  | 17.747966678 | 5.919703133  |
| O | 9.695864097  | 17.745594938 | 8.879508800  |
| O | 9.687239664  | 17.755030462 | 0.002474161  |
| O | 6.435997939  | 18.528832386 | 0.006423473  |
| O | 6.447644217  | 18.471638450 | 5.900702311  |
| O | -0.065312232 | 18.457489450 | -0.104782693 |
| O | 6.426585995  | 18.499482462 | 2.969739811  |
| O | -0.062333121 | 18.459697240 | 6.037985055  |
| O | 6.416348352  | 18.461072063 | 8.908046764  |
| O | -0.069795706 | 18.625650094 | 8.876353491  |
| O | -0.070155236 | 18.694849177 | 2.966652995  |
| O | 1.927076688  | 19.940888442 | 4.430885986  |
| O | 4.402286580  | 19.966809701 | 1.483282432  |
| O | 4.419687806  | 19.979299555 | 4.466965556  |
| O | 1.970813354  | 20.002856933 | 7.407115042  |
| O | 1.960320612  | 19.983853010 | 10.346482354 |
| O | 4.448357984  | 19.899408354 | 7.385422867  |
| O | 4.425351442  | 19.942101458 | 10.354759289 |
| O | 8.456399804  | 19.963226374 | 1.488620776  |
| O | 8.442287603  | 19.981450194 | 4.461583443  |
| O | 10.933797271 | 19.946490248 | 1.495653236  |
| O | 10.932323691 | 19.948993434 | 4.437325428  |

|   |              |              |              |
|---|--------------|--------------|--------------|
| O | 8.412278539  | 19.933229579 | 7.393592862  |
| O | 8.432539379  | 19.965463810 | 10.345203811 |
| O | 10.888149172 | 20.007508972 | 7.404720849  |
| O | 10.897663078 | 19.990529243 | 10.349347128 |
| O | 1.922139645  | 19.936763615 | 1.502489680  |
| O | -0.061689786 | 21.058970197 | 0.090297821  |
| O | 6.430374698  | 21.102657360 | 3.008103322  |
| O | -0.061797074 | 21.061604471 | 5.837515922  |
| O | -0.064758130 | 21.263507401 | 8.876934443  |
| O | 6.405572584  | 21.111050604 | 8.801726341  |
| O | 6.434356285  | 21.120448266 | -0.006945631 |
| H | 0.000000000  | 0.932897449  | 9.814799089  |
| H | 0.816399334  | 0.932897449  | 8.400899272  |
| H | 6.457698847  | 0.932897449  | 6.856699960  |
| H | 0.834099172  | 0.932897449  | -0.439201108 |
| H | 0.000000000  | 0.932897449  | 3.899999089  |
| H | 0.816399334  | 0.932897449  | 2.486099272  |
| H | 6.457698847  | 0.932897449  | 0.941899960  |
| H | 0.834099172  | 0.932897449  | 5.475598892  |
| H | 6.494400000  | 0.932897449  | 9.814799089  |
| H | 7.310799334  | 0.932897449  | 8.400899272  |
| H | -0.036701153 | 0.932897449  | 6.856699960  |

|   |              |              |              |
|---|--------------|--------------|--------------|
| H | 7.328499172  | 0.932897449  | -0.439201108 |
| H | 6.494400000  | 0.932897449  | 3.899999089  |
| H | 7.310799334  | 0.932897449  | 2.486099272  |
| H | -0.036701153 | 0.932897449  | 0.941899960  |
| H | 7.328499172  | 0.932897449  | 5.475598892  |
| H | 6.429441842  | 20.851783002 | 5.952716589  |
| H | 7.117792780  | 21.772254535 | 8.750421602  |

TS13-E3:

|    |             |             |              |
|----|-------------|-------------|--------------|
| Ti | 3.247200000 | 3.247190143 | 1.478700000  |
| Ti | 3.247200000 | 3.247190143 | 4.436100000  |
| Ti | 0.000000000 | 3.247190143 | 2.957400000  |
| Ti | 0.000000000 | 3.247190143 | 0.000000000  |
| Ti | 3.247200000 | 3.247190143 | 7.393500000  |
| Ti | 3.247200000 | 3.247190143 | 10.350900000 |
| Ti | 0.000000000 | 3.247190143 | 8.872200000  |
| Ti | 0.000000000 | 3.247190143 | 5.914800000  |
| Ti | 9.741600000 | 3.247190143 | 1.478700000  |
| Ti | 9.741600000 | 3.247190143 | 4.436100000  |
| Ti | 6.494400000 | 3.247190143 | 2.957400000  |
| Ti | 6.494400000 | 3.247190143 | 0.000000000  |
| Ti | 9.741600000 | 3.247190143 | 7.393500000  |
| Ti | 9.741600000 | 3.247190143 | 10.350900000 |

|    |              |             |              |
|----|--------------|-------------|--------------|
| Ti | 6.494400000  | 3.247190143 | 8.872200000  |
| Ti | 6.494400000  | 3.247190143 | 5.914800000  |
| Ti | 0.000000000  | 6.494389931 | 4.436100000  |
| Ti | 0.000000000  | 6.494389931 | 1.478700000  |
| Ti | 3.247200000  | 6.494389931 | 2.957400000  |
| Ti | 3.247200000  | 6.494389931 | 0.000000000  |
| Ti | 0.000000000  | 6.494389931 | 10.350900000 |
| Ti | 0.000000000  | 6.494389931 | 7.393500000  |
| Ti | 3.247200000  | 6.494389931 | 8.872200000  |
| Ti | 3.247200000  | 6.494389931 | 5.914800000  |
| Ti | 6.494400000  | 6.494389931 | 4.436100000  |
| Ti | 6.494400000  | 6.494389931 | 1.478700000  |
| Ti | 9.741600000  | 6.494389931 | 2.957400000  |
| Ti | 9.741600000  | 6.494389931 | 0.000000000  |
| Ti | 6.494400000  | 6.494389931 | 10.350900000 |
| Ti | 6.494400000  | 6.494389931 | 7.393500000  |
| Ti | 9.741600000  | 6.494389931 | 8.872200000  |
| Ti | 9.741600000  | 6.494389931 | 5.914800000  |
| Ti | 3.230787872  | 9.748258093 | 1.480886702  |
| Ti | 3.233965192  | 9.744802997 | 4.436591283  |
| Ti | -0.013754100 | 9.738748988 | 2.967065848  |
| Ti | -0.015683327 | 9.766985908 | 0.004210628  |



|    |              |              |              |
|----|--------------|--------------|--------------|
| Ti | 3.235675817  | 9.748467406  | 7.393138251  |
| Ti | 3.233173265  | 9.739202619  | 10.351050473 |
| Ti | -0.012429632 | 9.768361803  | 8.878440351  |
| Ti | -0.015537722 | 9.766542636  | 5.925783902  |
| Ti | 9.729666410  | 9.748259879  | 1.480135640  |
| Ti | 9.726291790  | 9.744569038  | 4.436658239  |
| Ti | 6.483280158  | 9.765325691  | 2.957718098  |
| Ti | 6.476632361  | 9.774637627  | 0.004640989  |
| Ti | 9.725071103  | 9.748838527  | 7.392886635  |
| Ti | 9.728334409  | 9.740090235  | 10.351209936 |
| Ti | 6.484585403  | 9.771735818  | 8.881155835  |
| Ti | 6.475562343  | 9.743145994  | 5.919114492  |
| Ti | -0.035061317 | 13.024438827 | 1.453453149  |
| Ti | -0.034190029 | 13.024244516 | 4.463759024  |
| Ti | 3.213186489  | 13.010331976 | 2.958696406  |
| Ti | 3.212337931  | 13.008878213 | 5.916271129  |
| Ti | 6.459917464  | 13.137371508 | 1.429479874  |
| Ti | 6.459784718  | 13.024141288 | 4.413212445  |
| Ti | 9.705994972  | 13.010035151 | 2.958975821  |
| Ti | 9.708517267  | 13.009262907 | 5.916634889  |
| Ti | -0.033014023 | 13.140769811 | 7.445671848  |
| Ti | -0.034641000 | 13.141203796 | 10.303217130 |

|    |              |              |              |
|----|--------------|--------------|--------------|
| Ti | 3.215168710  | 13.005012349 | 8.874377948  |
| Ti | 3.210312328  | 13.002843493 | 0.000925548  |
| Ti | 6.460356485  | 13.035409553 | 7.427276820  |
| Ti | 6.460325442  | 13.159688008 | 10.395330203 |
| Ti | 9.704445018  | 13.005487768 | 8.873361194  |
| Ti | 9.708650791  | 13.004467992 | 0.001307289  |
| Ti | 9.695192966  | 16.332173346 | 1.481165170  |
| Ti | 9.696395989  | 16.333201338 | 4.440465122  |
| Ti | 6.445444304  | 16.341848544 | 2.944751792  |
| Ti | -0.050936618 | 16.339160692 | 5.945061181  |
| Ti | 3.196049196  | 16.331406817 | 1.480830629  |
| Ti | 3.195461713  | 16.333080965 | 4.440668710  |
| Ti | -0.045990743 | 16.298576079 | 2.961197656  |
| Ti | 6.446354948  | 16.294503759 | 5.914939708  |
| Ti | 3.203493987  | 16.331159641 | 7.400002258  |
| Ti | 3.199406541  | 16.324885604 | 10.355314097 |
| Ti | -0.045170500 | 16.773635576 | 8.876827030  |
| Ti | 6.444339736  | 16.761595425 | 0.011113199  |
| Ti | 9.690903934  | 16.331639347 | 7.400388968  |
| Ti | 9.694846425  | 16.326098620 | 10.355318001 |
| Ti | 6.448217412  | 16.385421049 | 8.901787486  |
| Ti | -0.051404345 | 16.342862249 | -0.018450154 |

|    |              |              |              |
|----|--------------|--------------|--------------|
| Ti | 6.431745406  | 19.540850934 | 7.429978819  |
| Ti | 6.430462242  | 20.105077850 | 10.304845001 |
| Ti | 3.189907572  | 19.577350011 | 8.876383775  |
| Ti | 3.179124920  | 19.582474969 | 0.001523298  |
| Ti | 6.431450560  | 20.107392082 | 1.419696439  |
| Ti | 6.427595614  | 19.684371558 | 4.215390658  |
| Ti | 3.178732398  | 19.578329068 | 2.957858634  |
| Ti | 3.184546575  | 19.577559324 | 5.916909809  |
| Ti | -0.064353269 | 19.594740507 | 1.278285874  |
| Ti | -0.064247151 | 19.602303286 | 4.644309241  |
| Ti | 9.686945078  | 19.579958210 | 2.958166913  |
| Ti | 9.675903948  | 19.577603973 | 5.915758789  |
| Ti | -0.063024645 | 20.130327592 | 7.419192235  |
| Ti | -0.060127883 | 20.125508031 | 10.332738607 |
| Ti | 9.677717705  | 19.577959376 | 8.876612086  |
| Ti | 9.684225353  | 19.583751208 | 0.000528665  |
| O  | 0.000000000  | 1.266689833  | 2.957400000  |
| O  | 0.000000000  | 1.266689833  | 0.000000000  |
| O  | 0.000000000  | 1.266689833  | 8.872200000  |
| O  | 0.000000000  | 1.266689833  | 5.914800000  |
| O  | 6.494400000  | 1.266689833  | 2.957400000  |
| O  | 6.494400000  | 1.266689833  | 0.000000000  |

|   |              |             |              |
|---|--------------|-------------|--------------|
| O | 6.494400000  | 1.266689833 | 8.872200000  |
| O | 6.494400000  | 1.266689833 | 5.914800000  |
| O | 9.741600000  | 1.980499953 | 8.872200000  |
| O | 9.741600000  | 1.980499953 | 5.914800000  |
| O | 9.741600000  | 1.980499953 | 2.957400000  |
| O | 9.741600000  | 1.980499953 | 0.000000000  |
| O | 3.247200000  | 1.980499953 | 8.872200000  |
| O | 3.247200000  | 1.980499953 | 5.914800000  |
| O | 3.247200000  | 1.980499953 | 2.957400000  |
| O | 3.247200000  | 1.980499953 | 0.000000000  |
| O | 1.266699988  | 3.247190143 | 1.478700000  |
| O | 1.266699988  | 3.247190143 | 4.436100000  |
| O | 5.227599998  | 3.247190143 | 1.478700000  |
| O | 5.227599998  | 3.247190143 | 4.436100000  |
| O | 1.266699988  | 3.247190143 | 7.393500000  |
| O | 1.266699988  | 3.247190143 | 10.350900000 |
| O | 5.227599998  | 3.247190143 | 7.393500000  |
| O | 5.227599998  | 3.247190143 | 10.350900000 |
| O | 7.761099988  | 3.247190143 | 1.478700000  |
| O | 7.761099988  | 3.247190143 | 4.436100000  |
| O | 11.721999998 | 3.247190143 | 1.478700000  |
| O | 11.721999998 | 3.247190143 | 4.436100000  |

|   |              |             |              |
|---|--------------|-------------|--------------|
| O | 7.761099988  | 3.247190143 | 7.393500000  |
| O | 7.761099988  | 3.247190143 | 10.350900000 |
| O | 11.721999998 | 3.247190143 | 7.393500000  |
| O | 11.721999998 | 3.247190143 | 10.350900000 |
| O | 9.741600000  | 4.513899978 | 8.872200000  |
| O | 9.741600000  | 4.513899978 | 5.914800000  |
| O | 9.741600000  | 4.513899978 | 2.957400000  |
| O | 9.741600000  | 4.513899978 | 0.000000000  |
| O | 3.247200000  | 4.513899978 | 8.872200000  |
| O | 3.247200000  | 4.513899978 | 5.914800000  |
| O | 3.247200000  | 4.513899978 | 2.957400000  |
| O | 3.247200000  | 4.513899978 | 0.000000000  |
| O | 0.000000000  | 5.227600085 | 2.957400000  |
| O | 0.000000000  | 5.227600085 | 0.000000000  |
| O | 0.000000000  | 5.227600085 | 8.872200000  |
| O | 0.000000000  | 5.227600085 | 5.914800000  |
| O | 6.494400000  | 5.227600085 | 0.000000000  |
| O | 6.494400000  | 5.227600085 | 2.957400000  |
| O | 6.494400000  | 5.227600085 | 8.872200000  |
| O | 6.494400000  | 5.227600085 | 5.914800000  |
| O | 8.474900012  | 6.494389931 | 7.393500000  |
| O | 11.008299988 | 6.494389931 | 7.393500000  |

|   |              |             |              |
|---|--------------|-------------|--------------|
| O | 8.474900012  | 6.494389931 | 10.350900000 |
| O | 11.008299988 | 6.494389931 | 10.350900000 |
| O | 8.474900012  | 6.494389931 | 1.478700000  |
| O | 11.008299988 | 6.494389931 | 1.478700000  |
| O | 8.474900012  | 6.494389931 | 4.436100000  |
| O | 11.008299988 | 6.494389931 | 4.436100000  |
| O | 1.980500012  | 6.494389931 | 1.478700000  |
| O | 4.513899988  | 6.494389931 | 1.478700000  |
| O | 1.980500012  | 6.494389931 | 4.436100000  |
| O | 4.513899988  | 6.494389931 | 4.436100000  |
| O | 1.980500012  | 6.494389931 | 7.393500000  |
| O | 4.513899988  | 6.494389931 | 7.393500000  |
| O | 1.980500012  | 6.494389931 | 10.350900000 |
| O | 4.513899988  | 6.494389931 | 10.350900000 |
| O | 0.000000000  | 7.761090122 | 8.872200000  |
| O | 0.000000000  | 7.761090122 | 5.914800000  |
| O | 6.494400000  | 7.761090122 | 2.957400000  |
| O | 6.494400000  | 7.761090122 | 0.000000000  |
| O | 0.000000000  | 7.761090122 | 2.957400000  |
| O | 0.000000000  | 7.761090122 | 0.000000000  |
| O | 6.494400000  | 7.761090122 | 8.872200000  |
| O | 6.494400000  | 7.761090122 | 5.914800000  |

|   |              |             |              |
|---|--------------|-------------|--------------|
| O | 3.247200000  | 8.474889884 | 2.957400000  |
| O | 3.247200000  | 8.474889884 | 0.000000000  |
| O | 3.247200000  | 8.474889884 | 8.872200000  |
| O | 3.247200000  | 8.474889884 | 5.914800000  |
| O | 9.741600000  | 8.474889884 | 2.957400000  |
| O | 9.741600000  | 8.474889884 | 0.000000000  |
| O | 9.741600000  | 8.474889884 | 8.872200000  |
| O | 9.741600000  | 8.474889884 | 5.914800000  |
| O | 1.263735425  | 9.784656085 | 1.483552975  |
| O | 1.263766857  | 9.783875625 | 4.437739701  |
| O | 5.209312417  | 9.778563142 | 1.481998092  |
| O | 5.209685066  | 9.776234622 | 4.438843284  |
| O | 1.264305763  | 9.785221159 | 7.395637017  |
| O | 1.264131713  | 9.785815523 | 10.354506608 |
| O | 5.209460230  | 9.778078436 | 7.395738042  |
| O | 5.209471530  | 9.780026192 | 10.351813363 |
| O | 7.758490928  | 9.786155567 | 1.480208629  |
| O | 7.757688480  | 9.783695959 | 4.441205064  |
| O | 11.703776582 | 9.777025798 | 1.484281087  |
| O | 11.703977648 | 9.776353924 | 4.437311351  |
| O | 7.758337530  | 9.786479181 | 7.393214079  |
| O | 7.758839158  | 9.786885663 | 10.353905192 |

|   |              |              |              |
|---|--------------|--------------|--------------|
| O | 11.703825679 | 9.778000568  | 7.396494545  |
| O | 11.703924394 | 9.778377404  | 10.353308980 |
| O | 9.729912158  | 11.078074069 | 2.960458661  |
| O | 9.728862014  | 11.076776756 | 0.001862571  |
| O | 3.233435119  | 11.078136934 | 2.960388394  |
| O | 3.236091848  | 11.076427067 | 0.002081536  |
| O | 3.233413298  | 11.076726392 | 8.873109223  |
| O | 3.236278368  | 11.077627581 | 5.914278196  |
| O | 9.729978531  | 11.077280036 | 8.872830163  |
| O | 9.728807980  | 11.078096929 | 5.914491129  |
| O | 6.464795407  | 11.804091506 | 8.873791554  |
| O | -0.031218581 | 11.803570009 | 2.960888076  |
| O | 6.463214541  | 11.806052478 | 0.000523105  |
| O | 6.462744736  | 11.804254742 | 5.917890483  |
| O | -0.030770078 | 11.798186802 | 0.006137670  |
| O | -0.030366905 | 11.799406605 | 5.913570076  |
| O | 6.464244033  | 11.798964404 | 2.963724577  |
| O | -0.030522121 | 11.801896575 | 8.874083864  |
| O | 8.440723232  | 13.101373568 | 1.486631510  |
| O | 8.436321457  | 13.105703422 | 4.438744625  |
| O | 10.982062612 | 13.114441712 | 1.482591110  |
| O | 10.982104436 | 13.120860769 | 4.438469469  |



|   |              |              |              |
|---|--------------|--------------|--------------|
| O | 1.940890017  | 13.098879312 | 1.482623760  |
| O | 1.941277083  | 13.104000699 | 4.438673293  |
| O | 4.482510605  | 13.118302219 | 1.486663568  |
| O | 4.486955892  | 13.122003062 | 4.437993564  |
| O | 1.946128660  | 13.100507383 | 7.390187121  |
| O | 1.945666908  | 13.097703801 | 10.357597683 |
| O | 4.486905885  | 13.114914989 | 7.394472866  |
| O | 4.483020545  | 13.117046340 | 10.350150950 |
| O | 8.436543566  | 13.100897077 | 7.393640536  |
| O | 8.440453584  | 13.100550603 | 10.350085414 |
| O | 10.977825536 | 13.118142198 | 7.391033055  |
| O | 10.977537314 | 13.115013930 | 10.356772450 |
| O | -0.032569416 | 14.426342836 | 2.959037453  |
| O | -0.032107664 | 14.418190338 | 5.909668793  |
| O | -0.028192320 | 14.384632361 | 8.875575458  |
| O | -0.032323018 | 14.417265216 | 0.011992375  |
| O | 6.462626278  | 14.418674687 | 2.967114231  |
| O | 6.462039704  | 14.420611727 | 5.922141686  |
| O | 6.463031009  | 14.433424480 | 8.866526760  |
| O | 6.465061808  | 14.392505181 | 0.005202776  |
| O | 9.676818230  | 15.118924099 | 8.876717724  |
| O | 3.208849399  | 15.117853244 | 8.876331015  |

|   |              |              |              |
|---|--------------|--------------|--------------|
| O | 9.692286462  | 15.121969856 | 5.921384829  |
| O | 9.697231688  | 15.121741969 | 2.959273927  |
| O | 3.188136030  | 15.121644813 | 2.959357917  |
| O | 9.700573317  | 15.119350227 | 0.005161728  |
| O | 3.186553215  | 15.119140199 | 0.005009008  |
| O | 3.194583410  | 15.121134746 | 5.920874026  |
| O | 1.231154968  | 16.470388630 | 10.338356247 |
| O | 5.163926043  | 16.454271158 | 4.437713321  |
| O | 5.166796178  | 16.485551335 | 7.400511404  |
| O | 7.726532635  | 16.470502931 | 1.472994584  |
| O | 7.727245071  | 16.467263935 | 4.437197077  |
| O | 5.165796170  | 16.469497799 | 10.371586185 |
| O | 11.662317631 | 16.480404231 | 1.482009685  |
| O | 11.663018247 | 16.473522613 | 4.440268278  |
| O | 1.227739953  | 16.486099264 | 4.441441774  |
| O | 1.227714105  | 16.493058392 | 1.480081579  |
| O | 5.164460012  | 16.456532883 | 1.472415170  |
| O | 7.725387413  | 16.500762260 | 7.400551033  |
| O | 7.727301312  | 16.484239020 | 10.371041077 |
| O | 1.230445650  | 16.465696943 | 7.415233814  |
| O | 11.662590396 | 16.452396983 | 7.418754895  |
| O | 11.661999925 | 16.456194625 | 10.334334538 |

|   |              |              |              |
|---|--------------|--------------|--------------|
| O | 3.183335759  | 17.749514738 | 8.878281479  |
| O | 3.198846594  | 17.753886026 | 0.004615910  |
| O | 9.681035304  | 17.754859011 | 2.962265869  |
| O | 9.709145015  | 17.751519287 | 5.916030397  |
| O | 3.209674448  | 17.753766725 | 2.962087361  |
| O | 3.182614231  | 17.750973858 | 5.915964979  |
| O | 9.710618075  | 17.750807408 | 8.878748867  |
| O | 9.693359857  | 17.754539326 | 0.004636257  |
| O | 6.429665509  | 18.604610547 | 0.025278081  |
| O | 6.430789170  | 18.569726325 | 5.872924399  |
| O | -0.064954261 | 18.456184993 | -0.110058576 |
| O | 6.429285067  | 18.484152236 | 2.882984363  |
| O | -0.063411711 | 18.462635840 | 6.030447116  |
| O | 6.430151550  | 18.511946598 | 8.969974365  |
| O | -0.062113740 | 18.625570798 | 8.866083505  |
| O | -0.064202340 | 18.685816920 | 2.967069870  |
| O | 1.935419134  | 19.944532849 | 4.425633052  |
| O | 4.395125076  | 20.003850277 | 1.473067691  |
| O | 4.435029137  | 19.963632498 | 4.458347456  |
| O | 1.977976807  | 20.009797486 | 7.400450363  |
| O | 1.955238614  | 19.970621987 | 10.345496475 |
| O | 4.453439722  | 19.888884830 | 7.384396176  |

|   |              |              |              |
|---|--------------|--------------|--------------|
| O | 4.411893357  | 19.967341914 | 10.355960585 |
| O | 8.468102973  | 19.995686349 | 1.472812881  |
| O | 8.426919904  | 19.952571404 | 4.456907675  |
| O | 10.942106855 | 19.937514427 | 1.499111383  |
| O | 10.927507704 | 19.954558093 | 4.426245943  |
| O | 8.411669234  | 19.880418719 | 7.385279019  |
| O | 8.448997747  | 19.955106022 | 10.355488938 |
| O | 10.885637788 | 20.017943913 | 7.399192758  |
| O | 10.907624709 | 19.984624539 | 10.345699471 |
| O | 1.922454234  | 19.928063901 | 1.499622895  |
| O | -0.058129426 | 21.056288417 | 0.090473964  |
| O | 6.434583848  | 21.085805505 | 3.005364178  |
| O | -0.058907066 | 21.062390646 | 5.831686177  |
| O | -0.058329583 | 21.265269775 | 8.874452474  |
| O | 6.433844786  | 21.211129097 | 8.851065592  |
| O | 6.434980267  | 21.224373693 | -0.029744110 |
| H | 0.000000000  | 0.932899949  | 9.814800036  |
| H | 0.816399984  | 0.932899949  | 8.400899982  |
| H | 6.457700016  | 0.932899949  | 6.856699960  |
| H | 0.834099951  | 0.932899949  | -0.439200043 |
| H | 0.000000000  | 0.932899949  | 3.900000036  |
| H | 0.816399984  | 0.932899949  | 2.486099982  |

|   |              |              |              |
|---|--------------|--------------|--------------|
| H | 6.457700016  | 0.932899949  | 0.941899960  |
| H | 0.834099951  | 0.932899949  | 5.475599957  |
| H | 6.494400000  | 0.932899949  | 9.814800036  |
| H | 7.310799984  | 0.932899949  | 8.400899982  |
| H | -0.036699984 | 0.932899949  | 6.856699960  |
| H | 7.328499951  | 0.932899949  | -0.439200043 |
| H | 6.494400000  | 0.932899949  | 3.900000036  |
| H | 7.310799984  | 0.932899949  | 2.486099982  |
| H | -0.036699984 | 0.932899949  | 0.941899960  |
| H | 7.328499951  | 0.932899949  | 5.475599957  |
| H | 6.438691946  | 21.289703339 | 6.645852837  |
| H | 6.435230561  | 21.488261187 | 7.674709584  |

TS13-F1:

|    |             |             |              |
|----|-------------|-------------|--------------|
| Ti | 3.247200000 | 3.247190143 | 1.478700000  |
| Ti | 3.247200000 | 3.247190143 | 4.436100000  |
| Ti | 0.000000000 | 3.247190143 | 2.957400000  |
| Ti | 0.000000000 | 3.247190143 | 0.000000000  |
| Ti | 3.247200000 | 3.247190143 | 7.393500000  |
| Ti | 3.247200000 | 3.247190143 | 10.350900000 |
| Ti | 0.000000000 | 3.247190143 | 8.872200000  |
| Ti | 0.000000000 | 3.247190143 | 5.914800000  |
| Ti | 9.741600000 | 3.247190143 | 1.478700000  |

|    |             |             |              |
|----|-------------|-------------|--------------|
| Ti | 9.741600000 | 3.247190143 | 4.436100000  |
| Ti | 6.494400000 | 3.247190143 | 2.957400000  |
| Ti | 6.494400000 | 3.247190143 | 0.000000000  |
| Ti | 9.741600000 | 3.247190143 | 7.393500000  |
| Ti | 9.741600000 | 3.247190143 | 10.350900000 |
| Ti | 6.494400000 | 3.247190143 | 8.872200000  |
| Ti | 6.494400000 | 3.247190143 | 5.914800000  |
| Ti | 0.000000000 | 6.494389931 | 4.436100000  |
| Ti | 0.000000000 | 6.494389931 | 1.478700000  |
| Ti | 3.247200000 | 6.494389931 | 2.957400000  |
| Ti | 3.247200000 | 6.494389931 | 0.000000000  |
| Ti | 0.000000000 | 6.494389931 | 10.350900000 |
| Ti | 0.000000000 | 6.494389931 | 7.393500000  |
| Ti | 3.247200000 | 6.494389931 | 8.872200000  |
| Ti | 3.247200000 | 6.494389931 | 5.914800000  |
| Ti | 6.494400000 | 6.494389931 | 4.436100000  |
| Ti | 6.494400000 | 6.494389931 | 1.478700000  |
| Ti | 9.741600000 | 6.494389931 | 2.957400000  |
| Ti | 9.741600000 | 6.494389931 | 0.000000000  |
| Ti | 6.494400000 | 6.494389931 | 10.350900000 |
| Ti | 6.494400000 | 6.494389931 | 7.393500000  |
| Ti | 9.741600000 | 6.494389931 | 8.872200000  |

|    |              |              |              |
|----|--------------|--------------|--------------|
| Ti | 9.741600000  | 6.494389931  | 5.914800000  |
| Ti | 3.230258968  | 9.749536118  | 1.478906427  |
| Ti | 3.233736459  | 9.741810104  | 4.435941010  |
| Ti | -0.012495615 | 9.737980316  | 2.966247594  |
| Ti | -0.017087416 | 9.766656222  | 0.002625343  |
| Ti | 3.235675427  | 9.748847456  | 7.393706545  |
| Ti | 3.233644499  | 9.741362188  | 10.350919046 |
| Ti | -0.013144925 | 9.767820661  | 8.878347015  |
| Ti | -0.015847505 | 9.765729672  | 5.926108506  |
| Ti | 9.730624204  | 9.747683018  | 1.479465730  |
| Ti | 9.728034238  | 9.743884662  | 4.436617663  |
| Ti | 6.485693997  | 9.774425099  | 2.956469484  |
| Ti | 6.475324259  | 9.779975471  | 0.007381907  |
| Ti | 9.723903020  | 9.748060210  | 7.393625985  |
| Ti | 9.725616892  | 9.742903105  | 10.351324801 |
| Ti | 6.482244042  | 9.758616953  | 8.879890660  |
| Ti | 6.476087221  | 9.746302122  | 5.915166599  |
| Ti | -0.036145233 | 13.023427980 | 1.451993258  |
| Ti | -0.035700366 | 13.023343326 | 4.463353861  |
| Ti | 3.211671476  | 13.008597462 | 2.957980715  |
| Ti | 3.211571202  | 13.006794369 | 5.914742153  |
| Ti | 6.458044349  | 13.182463140 | 1.458649065  |

|    |              |              |              |
|----|--------------|--------------|--------------|
| Ti | 6.459392716  | 13.047095373 | 4.403377315  |
| Ti | 9.706148369  | 13.008699976 | 2.957492744  |
| Ti | 9.706518940  | 13.007285147 | 5.914719914  |
| Ti | -0.035139900 | 13.139113165 | 7.444970353  |
| Ti | -0.035789989 | 13.143169769 | 10.301619424 |
| Ti | 3.212493277  | 13.007298720 | 8.872836196  |
| Ti | 3.209410126  | 13.006069631 | 0.000372396  |
| Ti | 6.458397254  | 13.014189625 | 7.419450002  |
| Ti | 6.457263592  | 13.113162259 | 10.411439398 |
| Ti | 9.704505546  | 13.007216924 | 8.872554415  |
| Ti | 9.707267095  | 13.006398602 | 0.000147633  |
| Ti | 9.696420797  | 16.330706368 | 1.478234269  |
| Ti | 9.695837990  | 16.338915659 | 4.438154328  |
| Ti | 6.439849898  | 16.427905197 | 2.935666422  |
| Ti | -0.052503457 | 16.339056392 | 5.943353460  |
| Ti | 3.189962385  | 16.331093204 | 1.476296935  |
| Ti | 3.189460628  | 16.335890262 | 4.438348334  |
| Ti | -0.049484860 | 16.297334130 | 2.957919201  |
| Ti | 6.446474056  | 16.290314995 | 5.913573507  |
| Ti | 3.199544742  | 16.329374407 | 7.397554477  |
| Ti | 3.193906954  | 16.326805141 | 10.350958438 |
| Ti | -0.053113281 | 16.772140023 | 8.871436873  |



|    |              |              |              |
|----|--------------|--------------|--------------|
| Ti | 6.446494188  | 16.665674977 | -0.007823506 |
| Ti | 9.683839716  | 16.328306410 | 7.396536422  |
| Ti | 9.692178395  | 16.327100894 | 10.351257136 |
| Ti | 6.440953296  | 16.314376010 | 8.886024544  |
| Ti | -0.051433570 | 16.343096923 | -0.024479464 |
| Ti | 6.423125129  | 19.598415633 | 7.576484511  |
| Ti | 6.421354236  | 20.010017872 | 10.555750817 |
| Ti | 3.200338488  | 19.584967082 | 8.875224592  |
| Ti | 3.182035061  | 19.584731337 | 0.005543114  |
| Ti | 6.435273554  | 20.092552277 | 1.644505803  |
| Ti | 6.438771308  | 19.572932288 | 4.375763243  |
| Ti | 3.179488087  | 19.577548608 | 2.958072040  |
| Ti | 3.187320073  | 19.582611773 | 5.913175441  |
| Ti | -0.060939163 | 19.591333632 | 1.270978612  |
| Ti | -0.062355072 | 19.610943349 | 4.646524688  |
| Ti | 9.702271862  | 19.577074617 | 2.956994481  |
| Ti | 9.667755295  | 19.588042843 | 5.916153188  |
| Ti | -0.060276085 | 20.126523879 | 7.419584741  |
| Ti | -0.059351153 | 20.121856481 | 10.328636575 |
| Ti | 9.677840059  | 19.582832873 | 8.874935713  |
| Ti | 9.675163327  | 19.588755079 | 0.002175582  |
| O  | 0.000000000  | 1.266689833  | 2.957400000  |

|   |             |             |              |
|---|-------------|-------------|--------------|
| O | 0.000000000 | 1.266689833 | 0.000000000  |
| O | 0.000000000 | 1.266689833 | 8.872200000  |
| O | 0.000000000 | 1.266689833 | 5.914800000  |
| O | 6.494400000 | 1.266689833 | 2.957400000  |
| O | 6.494400000 | 1.266689833 | 0.000000000  |
| O | 6.494400000 | 1.266689833 | 8.872200000  |
| O | 6.494400000 | 1.266689833 | 5.914800000  |
| O | 9.741600000 | 1.980499953 | 8.872200000  |
| O | 9.741600000 | 1.980499953 | 5.914800000  |
| O | 9.741600000 | 1.980499953 | 2.957400000  |
| O | 9.741600000 | 1.980499953 | 0.000000000  |
| O | 3.247200000 | 1.980499953 | 8.872200000  |
| O | 3.247200000 | 1.980499953 | 5.914800000  |
| O | 3.247200000 | 1.980499953 | 2.957400000  |
| O | 3.247200000 | 1.980499953 | 0.000000000  |
| O | 1.266699988 | 3.247190143 | 1.478700000  |
| O | 1.266699988 | 3.247190143 | 4.436100000  |
| O | 5.227599998 | 3.247190143 | 1.478700000  |
| O | 5.227599998 | 3.247190143 | 4.436100000  |
| O | 1.266699988 | 3.247190143 | 7.393500000  |
| O | 1.266699988 | 3.247190143 | 10.350900000 |
| O | 5.227599998 | 3.247190143 | 7.393500000  |

|   |              |             |              |
|---|--------------|-------------|--------------|
| O | 5.227599998  | 3.247190143 | 10.350900000 |
| O | 7.761099988  | 3.247190143 | 1.478700000  |
| O | 7.761099988  | 3.247190143 | 4.436100000  |
| O | 11.721999998 | 3.247190143 | 1.478700000  |
| O | 11.721999998 | 3.247190143 | 4.436100000  |
| O | 7.761099988  | 3.247190143 | 7.393500000  |
| O | 7.761099988  | 3.247190143 | 10.350900000 |
| O | 11.721999998 | 3.247190143 | 7.393500000  |
| O | 11.721999998 | 3.247190143 | 10.350900000 |
| O | 9.741600000  | 4.513899978 | 8.872200000  |
| O | 9.741600000  | 4.513899978 | 5.914800000  |
| O | 9.741600000  | 4.513899978 | 2.957400000  |
| O | 9.741600000  | 4.513899978 | 0.000000000  |
| O | 3.247200000  | 4.513899978 | 8.872200000  |
| O | 3.247200000  | 4.513899978 | 5.914800000  |
| O | 3.247200000  | 4.513899978 | 2.957400000  |
| O | 3.247200000  | 4.513899978 | 0.000000000  |
| O | 0.000000000  | 5.227600085 | 2.957400000  |
| O | 0.000000000  | 5.227600085 | 0.000000000  |
| O | 0.000000000  | 5.227600085 | 8.872200000  |
| O | 0.000000000  | 5.227600085 | 5.914800000  |
| O | 6.494400000  | 5.227600085 | 0.000000000  |

|   |              |             |              |
|---|--------------|-------------|--------------|
| O | 6.494400000  | 5.227600085 | 2.957400000  |
| O | 6.494400000  | 5.227600085 | 8.872200000  |
| O | 6.494400000  | 5.227600085 | 5.914800000  |
| O | 8.474900012  | 6.494389931 | 7.393500000  |
| O | 11.008299988 | 6.494389931 | 7.393500000  |
| O | 8.474900012  | 6.494389931 | 10.350900000 |
| O | 11.008299988 | 6.494389931 | 10.350900000 |
| O | 8.474900012  | 6.494389931 | 1.478700000  |
| O | 11.008299988 | 6.494389931 | 1.478700000  |
| O | 8.474900012  | 6.494389931 | 4.436100000  |
| O | 11.008299988 | 6.494389931 | 4.436100000  |
| O | 1.980500012  | 6.494389931 | 1.478700000  |
| O | 4.513899988  | 6.494389931 | 1.478700000  |
| O | 1.980500012  | 6.494389931 | 4.436100000  |
| O | 4.513899988  | 6.494389931 | 4.436100000  |
| O | 1.980500012  | 6.494389931 | 7.393500000  |
| O | 4.513899988  | 6.494389931 | 7.393500000  |
| O | 1.980500012  | 6.494389931 | 10.350900000 |
| O | 4.513899988  | 6.494389931 | 10.350900000 |
| O | 0.000000000  | 7.761090122 | 8.872200000  |
| O | 0.000000000  | 7.761090122 | 5.914800000  |
| O | 6.494400000  | 7.761090122 | 2.957400000  |

|   |             |             |              |
|---|-------------|-------------|--------------|
| O | 6.494400000 | 7.761090122 | 0.000000000  |
| O | 0.000000000 | 7.761090122 | 2.957400000  |
| O | 0.000000000 | 7.761090122 | 0.000000000  |
| O | 6.494400000 | 7.761090122 | 8.872200000  |
| O | 6.494400000 | 7.761090122 | 5.914800000  |
| O | 3.247200000 | 8.474889884 | 2.957400000  |
| O | 3.247200000 | 8.474889884 | 0.000000000  |
| O | 3.247200000 | 8.474889884 | 8.872200000  |
| O | 3.247200000 | 8.474889884 | 5.914800000  |
| O | 9.741600000 | 8.474889884 | 2.957400000  |
| O | 9.741600000 | 8.474889884 | 0.000000000  |
| O | 9.741600000 | 8.474889884 | 8.872200000  |
| O | 9.741600000 | 8.474889884 | 5.914800000  |
| O | 1.263354723 | 9.785230089 | 1.482535038  |
| O | 1.263662687 | 9.784537498 | 4.437061155  |
| O | 5.209155253 | 9.779039276 | 1.482811141  |
| O | 5.210003941 | 9.779050349 | 4.435964669  |
| O | 1.263822969 | 9.785581206 | 7.395022588  |
| O | 1.263722825 | 9.786888164 | 10.354064655 |
| O | 5.209173437 | 9.776728616 | 7.393929060  |
| O | 5.209011337 | 9.780177997 | 10.352286193 |
| O | 7.758627440 | 9.787116765 | 1.479420778  |

|   |              |              |              |
|---|--------------|--------------|--------------|
| O | 7.758212578  | 9.786254509  | 4.438865406  |
| O | 11.703849709 | 9.777717317  | 1.484011845  |
| O | 11.703964530 | 9.776582882  | 4.436418571  |
| O | 7.757682765  | 9.784909332  | 7.392189872  |
| O | 7.757883442  | 9.787496101  | 10.354108188 |
| O | 11.703720470 | 9.778089152  | 7.395817774  |
| O | 11.703441081 | 9.778845322  | 10.352807641 |
| O | 9.729128284  | 11.078600209 | 2.958958668  |
| O | 9.728265568  | 11.077515067 | 0.002275778  |
| O | 3.233166381  | 11.078773089 | 2.958963045  |
| O | 3.236106006  | 11.077453987 | 0.002456062  |
| O | 3.233242625  | 11.077011429 | 8.871732494  |
| O | 3.235666855  | 11.077150733 | 5.913104345  |
| O | 9.729567046  | 11.077273606 | 8.871327449  |
| O | 9.728539502  | 11.077626510 | 5.913587111  |
| O | 6.462409105  | 11.793395816 | 8.873043569  |
| O | -0.031903740 | 11.804334038 | 2.959499517  |
| O | 6.461058400  | 11.809408275 | 0.010553896  |
| O | 6.461613281  | 11.803348551 | 5.909128890  |
| O | -0.032176375 | 11.799171575 | 0.005004512  |
| O | -0.031864124 | 11.799369815 | 5.911682072  |
| O | 6.463736950  | 11.810732378 | 2.954298042  |

|   |              |              |              |
|---|--------------|--------------|--------------|
| O | -0.031636820 | 11.802569521 | 8.872520109  |
| O | 8.439437600  | 13.110267593 | 1.483540909  |
| O | 8.436172216  | 13.105824153 | 4.436471095  |
| O | 10.981425122 | 13.115878329 | 1.481833543  |
| O | 10.981320952 | 13.119876711 | 4.436052090  |
| O | 1.939007940  | 13.100251993 | 1.482045766  |
| O | 1.939455534  | 13.103799244 | 4.436095741  |
| O | 4.481045598  | 13.127969916 | 1.483479986  |
| O | 4.484427492  | 13.121890904 | 4.435758953  |
| O | 1.944298668  | 13.099287937 | 7.386898373  |
| O | 1.943618704  | 13.095304200 | 10.355955261 |
| O | 4.485667533  | 13.113732333 | 7.391706633  |
| O | 4.481122362  | 13.115471847 | 10.348335461 |
| O | 8.434568879  | 13.098441398 | 7.391077180  |
| O | 8.438945195  | 13.097954191 | 10.347785266 |
| O | 10.976677326 | 13.117363524 | 7.387356061  |
| O | 10.977162458 | 13.112416089 | 10.355170367 |
| O | -0.034870252 | 14.428796015 | 2.957947592  |
| O | -0.033456811 | 14.419854485 | 5.907315767  |
| O | -0.031218451 | 14.386116842 | 8.872515377  |
| O | -0.033967141 | 14.418685403 | 0.009639468  |
| O | 6.459425838  | 14.439593504 | 2.968830588  |

|   |              |              |              |
|---|--------------|--------------|--------------|
| O | 6.459970978  | 14.419247976 | 5.911505930  |
| O | 6.458867579  | 14.401823904 | 8.862355880  |
| O | 6.463544586  | 14.405327578 | -0.008922594 |
| O | 9.689972767  | 15.116194455 | 8.871788685  |
| O | 3.192814076  | 15.115383277 | 8.871294444  |
| O | 9.691128381  | 15.124013339 | 5.911524029  |
| O | 9.693620152  | 15.125237071 | 2.961844736  |
| O | 3.189452834  | 15.125679986 | 2.960974550  |
| O | 9.705904440  | 15.119343083 | 0.000403626  |
| O | 3.175591577  | 15.118697641 | 0.000646251  |
| O | 3.191057341  | 15.123311461 | 5.911802143  |
| O | 1.227030634  | 16.470072875 | 10.330343467 |
| O | 5.164800059  | 16.499127760 | 4.436076459  |
| O | 5.161149297  | 16.446831610 | 7.389721862  |
| O | 7.729344191  | 16.459892610 | 1.464997301  |
| O | 7.722273218  | 16.505768631 | 4.431426243  |
| O | 5.157556985  | 16.434196380 | 10.354303021 |
| O | 11.661853152 | 16.485670993 | 1.477311442  |
| O | 11.660849897 | 16.482043732 | 4.439808343  |
| O | 1.224985678  | 16.493320569 | 4.438678025  |
| O | 1.223788760  | 16.497612204 | 1.477771140  |
| O | 5.158429313  | 16.447406685 | 1.460803945  |



|   |              |              |              |
|---|--------------|--------------|--------------|
| O | 7.724731478  | 16.454275087 | 7.395024717  |
| O | 7.728933095  | 16.444915644 | 10.350045193 |
| O | 1.227082070  | 16.469334921 | 7.412018411  |
| O | 11.658284868 | 16.458905337 | 7.411996408  |
| O | 11.658503860 | 16.459928686 | 10.329865907 |
| O | 3.196068420  | 17.755779132 | 8.870353636  |
| O | 3.198423549  | 17.754583261 | -0.005187280 |
| O | 9.688788578  | 17.752041499 | 2.955485852  |
| O | 9.689756374  | 17.760438315 | 5.927925651  |
| O | 3.202797657  | 17.752308319 | 2.954863734  |
| O | 3.186700897  | 17.755660188 | 5.924627440  |
| O | 9.684388103  | 17.755868787 | 8.868614803  |
| O | 9.682183384  | 17.758343397 | -0.008040461 |
| O | 6.439972901  | 18.540284246 | -0.052733163 |
| O | 6.458503243  | 18.586861074 | 5.988156769  |
| O | -0.060483906 | 18.455831733 | -0.120465904 |
| O | 6.430912174  | 18.506604111 | 2.798301462  |
| O | -0.060236209 | 18.467782944 | 6.029245583  |
| O | 6.425794717  | 18.440356130 | 8.918083351  |
| O | -0.062329095 | 18.625027512 | 8.866168205  |
| O | -0.067384206 | 18.700611362 | 2.968627828  |
| O | 1.939465795  | 19.956498705 | 4.434193187  |

|   |              |              |              |
|---|--------------|--------------|--------------|
| O | 4.385299828  | 19.995615982 | 1.482787482  |
| O | 4.444304569  | 19.919509564 | 4.457558894  |
| O | 1.983121152  | 20.002577967 | 7.405867729  |
| O | 1.966590566  | 19.981355182 | 10.337998520 |
| O | 4.473980990  | 19.959460879 | 7.382594292  |
| O | 4.430897400  | 19.972903715 | 10.353295376 |
| O | 8.483933073  | 19.987245598 | 1.488395185  |
| O | 8.428638972  | 19.921984532 | 4.447715721  |
| O | 10.947760880 | 19.932164082 | 1.485892870  |
| O | 10.926067506 | 19.966493231 | 4.442672644  |
| O | 8.394815227  | 20.006693150 | 7.390705139  |
| O | 8.439606974  | 19.998632807 | 10.344609255 |
| O | 10.885625059 | 20.005849468 | 7.402201381  |
| O | 10.902882108 | 19.986534076 | 10.338455497 |
| O | 1.920383689  | 19.922013464 | 1.492832941  |
| O | -0.056787423 | 21.054552117 | 0.085644293  |
| O | 6.439464650  | 21.305905823 | 2.960135004  |
| O | -0.057514926 | 21.068447870 | 5.837873767  |
| O | -0.060609508 | 21.264879367 | 8.873184223  |
| O | 6.416490970  | 21.173703114 | 8.829544355  |
| O | 6.443274525  | 21.209096331 | 0.030790438  |
| H | 0.000000000  | 0.932899949  | 9.814800036  |

|   |              |              |              |
|---|--------------|--------------|--------------|
| H | 0.816399984  | 0.932899949  | 8.400899982  |
| H | 6.457700016  | 0.932899949  | 6.856699960  |
| H | 0.834099951  | 0.932899949  | -0.439200043 |
| H | 0.000000000  | 0.932899949  | 3.900000036  |
| H | 0.816399984  | 0.932899949  | 2.486099982  |
| H | 6.457700016  | 0.932899949  | 0.941899960  |
| H | 0.834099951  | 0.932899949  | 5.475599957  |
| H | 6.494400000  | 0.932899949  | 9.814800036  |
| H | 7.310799984  | 0.932899949  | 8.400899982  |
| H | -0.036699984 | 0.932899949  | 6.856699960  |
| H | 7.328499951  | 0.932899949  | -0.439200043 |
| H | 6.494400000  | 0.932899949  | 3.900000036  |
| H | 7.310799984  | 0.932899949  | 2.486099982  |
| H | -0.036699984 | 0.932899949  | 0.941899960  |
| H | 7.328499951  | 0.932899949  | 5.475599957  |
| H | 6.435609964  | 21.322398702 | 4.345559909  |
| H | 7.171359371  | 21.785734518 | 8.790552811  |

14-Ea:

|    |             |             |             |
|----|-------------|-------------|-------------|
| Ti | 3.247200000 | 3.247194072 | 1.478700000 |
| Ti | 3.247200000 | 3.247194072 | 4.436100000 |
| Ti | 0.000000000 | 3.247194072 | 2.957400000 |
| Ti | 0.000000000 | 3.247194072 | 0.000000000 |

|    |             |             |              |
|----|-------------|-------------|--------------|
| Ti | 3.247200000 | 3.247194072 | 7.393500000  |
| Ti | 3.247200000 | 3.247194072 | 10.350900000 |
| Ti | 0.000000000 | 3.247194072 | 8.872200000  |
| Ti | 0.000000000 | 3.247194072 | 5.914800000  |
| Ti | 9.741600000 | 3.247194072 | 1.478700000  |
| Ti | 9.741600000 | 3.247194072 | 4.436100000  |
| Ti | 6.494400000 | 3.247194072 | 2.957400000  |
| Ti | 6.494400000 | 3.247194072 | 0.000000000  |
| Ti | 9.741600000 | 3.247194072 | 7.393500000  |
| Ti | 9.741600000 | 3.247194072 | 10.350900000 |
| Ti | 6.494400000 | 3.247194072 | 8.872200000  |
| Ti | 6.494400000 | 3.247194072 | 5.914800000  |
| Ti | 0.000000000 | 6.494391717 | 4.436100000  |
| Ti | 0.000000000 | 6.494391717 | 1.478700000  |
| Ti | 3.247200000 | 6.494391717 | 2.957400000  |
| Ti | 3.247200000 | 6.494391717 | 0.000000000  |
| Ti | 0.000000000 | 6.494391717 | 10.350900000 |
| Ti | 0.000000000 | 6.494391717 | 7.393500000  |
| Ti | 3.247200000 | 6.494391717 | 8.872200000  |
| Ti | 3.247200000 | 6.494391717 | 5.914800000  |
| Ti | 6.494400000 | 6.494391717 | 4.436100000  |
| Ti | 6.494400000 | 6.494391717 | 1.478700000  |

|    |              |             |              |
|----|--------------|-------------|--------------|
| Ti | 9.741600000  | 6.494391717 | 2.957400000  |
| Ti | 9.741600000  | 6.494391717 | 0.000000000  |
| Ti | 6.494400000  | 6.494391717 | 10.350900000 |
| Ti | 6.494400000  | 6.494391717 | 7.393500000  |
| Ti | 9.741600000  | 6.494391717 | 8.872200000  |
| Ti | 9.741600000  | 6.494391717 | 5.914800000  |
| Ti | 3.231042193  | 9.744718700 | 1.479109896  |
| Ti | 3.230911006  | 9.745033384 | 4.437202637  |
| Ti | -0.013246238 | 9.769432301 | 2.963217206  |
| Ti | -0.016002591 | 9.789198467 | 0.003270293  |
| Ti | 3.233003761  | 9.743505326 | 7.394689585  |
| Ti | 3.235043263  | 9.745693114 | 10.352327596 |
| Ti | -0.010305314 | 9.801233975 | 8.879459234  |
| Ti | -0.018545279 | 9.773011699 | 5.923639432  |
| Ti | 9.729106723  | 9.744698340 | 1.480118842  |
| Ti | 9.725628712  | 9.747623367 | 4.436327956  |
| Ti | 6.480384565  | 9.747924835 | 2.961838229  |
| Ti | 6.478080612  | 9.755743004 | 0.007421654  |
| Ti | 9.727995401  | 9.742326600 | 7.393666206  |
| Ti | 9.729481709  | 9.744962661 | 10.352333748 |
| Ti | 6.484761401  | 9.749305016 | 8.882863556  |
| Ti | 6.475490515  | 9.740015940 | 5.922590265  |

|    |              |              |              |
|----|--------------|--------------|--------------|
| Ti | -0.034858432 | 13.105333731 | 1.465060235  |
| Ti | -0.035771545 | 13.065454925 | 4.459949065  |
| Ti | 3.210950467  | 13.004457276 | 2.958475666  |
| Ti | 3.211326103  | 13.005248451 | 5.916175428  |
| Ti | 6.458606114  | 13.095117390 | 1.460574450  |
| Ti | 6.457686248  | 13.019579261 | 4.420513911  |
| Ti | 9.707177212  | 13.007759138 | 2.959813593  |
| Ti | 9.706201623  | 13.006308590 | 5.916627200  |
| Ti | -0.034725687 | 13.131417869 | 7.443160543  |
| Ti | -0.036460341 | 13.187355926 | 10.368080246 |
| Ti | 3.211234143  | 13.004154022 | 8.873603227  |
| Ti | 3.209892789  | 13.007716275 | 0.000331347  |
| Ti | 6.458863552  | 13.023086150 | 7.420032373  |
| Ti | 6.460146067  | 13.096211105 | 10.379435834 |
| Ti | 9.707294501  | 13.003877557 | 8.873655987  |
| Ti | 9.707815612  | 13.006638277 | 0.002633269  |
| Ti | 9.693154244  | 16.328129601 | 1.487669676  |
| Ti | 9.690563368  | 16.330266310 | 4.442318939  |
| Ti | 6.436869487  | 16.319540616 | 2.953926001  |
| Ti | -0.053070029 | 16.392248374 | 5.927528413  |
| Ti | 3.187459313  | 16.324642715 | 1.483543630  |
| Ti | 3.194018657  | 16.325152782 | 4.441685464  |

|    |              |              |              |
|----|--------------|--------------|--------------|
| Ti | -0.049537984 | 16.370274776 | 2.965248703  |
| Ti | 6.449739180  | 16.269406536 | 5.920755967  |
| Ti | 3.198258461  | 16.326087547 | 7.400164323  |
| Ti | 3.187591020  | 16.330294528 | 10.355348403 |
| Ti | -0.051679967 | 16.561834919 | 8.877255143  |
| Ti | 6.444666274  | 16.421640446 | 0.008443850  |
| Ti | 9.683605787  | 16.327800986 | 7.400364835  |
| Ti | 9.691817437  | 16.327182334 | 10.359797989 |
| Ti | 6.434825700  | 16.323992987 | 8.891447114  |
| Ti | -0.053618416 | 16.537217402 | 0.006871578  |
| Ti | 6.424665341  | 19.583068976 | 7.568908008  |
| Ti | 6.415566557  | 19.948435504 | 10.477925653 |
| Ti | 3.186192646  | 19.583030399 | 8.875026446  |
| Ti | 3.189449717  | 19.579894987 | 0.009552757  |
| Ti | 6.421703765  | 19.948879491 | 1.383202833  |
| Ti | 6.427793434  | 19.582107421 | 4.286749999  |
| Ti | 3.192156843  | 19.574681803 | 2.970730540  |
| Ti | 3.203876767  | 19.572459726 | 5.924044123  |
| Ti | -0.069389936 | 19.867944939 | 1.395828802  |
| Ti | -0.085352003 | 19.675936522 | 4.448465954  |
| Ti | 9.689163825  | 19.576158068 | 2.968365448  |
| Ti | 9.645230248  | 19.581423760 | 5.929095835  |

|    |              |              |              |
|----|--------------|--------------|--------------|
| Ti | -0.083005316 | 19.901659007 | 7.489424689  |
| Ti | -0.061862537 | 20.014528822 | 10.362553221 |
| Ti | 9.681084272  | 19.579038446 | 8.883298294  |
| Ti | 9.655437886  | 19.581670935 | 0.007334470  |
| O  | 0.000000000  | 1.266694833  | 2.957400000  |
| O  | 0.000000000  | 1.266694833  | 0.000000000  |
| O  | 0.000000000  | 1.266694833  | 8.872200000  |
| O  | 0.000000000  | 1.266694833  | 5.914800000  |
| O  | 6.494400000  | 1.266694833  | 2.957400000  |
| O  | 6.494400000  | 1.266694833  | 0.000000000  |
| O  | 6.494400000  | 1.266694833  | 8.872200000  |
| O  | 6.494400000  | 1.266694833  | 5.914800000  |
| O  | 9.741600000  | 1.980495667  | 8.872200000  |
| O  | 9.741600000  | 1.980495667  | 5.914800000  |
| O  | 9.741600000  | 1.980495667  | 2.957400000  |
| O  | 9.741600000  | 1.980495667  | 0.000000000  |
| O  | 3.247200000  | 1.980495667  | 8.872200000  |
| O  | 3.247200000  | 1.980495667  | 5.914800000  |
| O  | 3.247200000  | 1.980495667  | 2.957400000  |
| O  | 3.247200000  | 1.980495667  | 0.000000000  |
| O  | 1.266698949  | 3.247194072  | 1.478700000  |
| O  | 1.266698949  | 3.247194072  | 4.436100000  |



|   |              |             |              |
|---|--------------|-------------|--------------|
| O | 5.227599738  | 3.247194072 | 1.478700000  |
| O | 5.227599738  | 3.247194072 | 4.436100000  |
| O | 1.266698949  | 3.247194072 | 7.393500000  |
| O | 1.266698949  | 3.247194072 | 10.350900000 |
| O | 5.227599738  | 3.247194072 | 7.393500000  |
| O | 5.227599738  | 3.247194072 | 10.350900000 |
| O | 7.761098949  | 3.247194072 | 1.478700000  |
| O | 7.761098949  | 3.247194072 | 4.436100000  |
| O | 11.721999738 | 3.247194072 | 1.478700000  |
| O | 11.721999738 | 3.247194072 | 4.436100000  |
| O | 7.761098949  | 3.247194072 | 7.393500000  |
| O | 7.761098949  | 3.247194072 | 10.350900000 |
| O | 11.721999738 | 3.247194072 | 7.393500000  |
| O | 11.721999738 | 3.247194072 | 10.350900000 |
| O | 9.741600000  | 4.513896049 | 8.872200000  |
| O | 9.741600000  | 4.513896049 | 5.914800000  |
| O | 9.741600000  | 4.513896049 | 2.957400000  |
| O | 9.741600000  | 4.513896049 | 0.000000000  |
| O | 3.247200000  | 4.513896049 | 8.872200000  |
| O | 3.247200000  | 4.513896049 | 5.914800000  |
| O | 3.247200000  | 4.513896049 | 2.957400000  |
| O | 3.247200000  | 4.513896049 | 0.000000000  |

|   |              |             |              |
|---|--------------|-------------|--------------|
| O | 0.000000000  | 5.227596870 | 2.957400000  |
| O | 0.000000000  | 5.227596870 | 0.000000000  |
| O | 0.000000000  | 5.227596870 | 8.872200000  |
| O | 0.000000000  | 5.227596870 | 5.914800000  |
| O | 6.494400000  | 5.227596870 | 0.000000000  |
| O | 6.494400000  | 5.227596870 | 2.957400000  |
| O | 6.494400000  | 5.227596870 | 8.872200000  |
| O | 6.494400000  | 5.227596870 | 5.914800000  |
| O | 8.474899752  | 6.494391717 | 7.393500000  |
| O | 11.008298949 | 6.494391717 | 7.393500000  |
| O | 8.474899752  | 6.494391717 | 10.350900000 |
| O | 11.008298949 | 6.494391717 | 10.350900000 |
| O | 8.474899752  | 6.494391717 | 1.478700000  |
| O | 11.008298949 | 6.494391717 | 1.478700000  |
| O | 8.474899752  | 6.494391717 | 4.436100000  |
| O | 11.008298949 | 6.494391717 | 4.436100000  |
| O | 1.980499752  | 6.494391717 | 1.478700000  |
| O | 4.513898949  | 6.494391717 | 1.478700000  |
| O | 1.980499752  | 6.494391717 | 4.436100000  |
| O | 4.513898949  | 6.494391717 | 4.436100000  |
| O | 1.980499752  | 6.494391717 | 7.393500000  |
| O | 4.513898949  | 6.494391717 | 7.393500000  |

|   |             |             |              |
|---|-------------|-------------|--------------|
| O | 1.980499752 | 6.494391717 | 10.350900000 |
| O | 4.513898949 | 6.494391717 | 10.350900000 |
| O | 0.000000000 | 7.761086550 | 8.872200000  |
| O | 0.000000000 | 7.761086550 | 5.914800000  |
| O | 6.494400000 | 7.761086550 | 2.957400000  |
| O | 6.494400000 | 7.761086550 | 0.000000000  |
| O | 0.000000000 | 7.761086550 | 2.957400000  |
| O | 0.000000000 | 7.761086550 | 0.000000000  |
| O | 6.494400000 | 7.761086550 | 8.872200000  |
| O | 6.494400000 | 7.761086550 | 5.914800000  |
| O | 3.247200000 | 8.474887384 | 2.957400000  |
| O | 3.247200000 | 8.474887384 | 0.000000000  |
| O | 3.247200000 | 8.474887384 | 8.872200000  |
| O | 3.247200000 | 8.474887384 | 5.914800000  |
| O | 9.741600000 | 8.474887384 | 2.957400000  |
| O | 9.741600000 | 8.474887384 | 0.000000000  |
| O | 9.741600000 | 8.474887384 | 8.872200000  |
| O | 9.741600000 | 8.474887384 | 5.914800000  |
| O | 1.263421615 | 9.793990524 | 1.481712408  |
| O | 1.263010390 | 9.791000489 | 4.439999983  |
| O | 5.208728051 | 9.776206047 | 1.481711343  |
| O | 5.208575822 | 9.776954717 | 4.439213314  |

|   |              |              |              |
|---|--------------|--------------|--------------|
| O | 1.263636450  | 9.793394375  | 7.395507956  |
| O | 1.264374733  | 9.796044365  | 10.355405185 |
| O | 5.209324237  | 9.777241897  | 7.398553250  |
| O | 5.209583623  | 9.776848274  | 10.354169110 |
| O | 7.758243751  | 9.784354974  | 1.481713709  |
| O | 7.757411689  | 9.785502982  | 4.440101599  |
| O | 11.703885298 | 9.786220576  | 1.482785707  |
| O | 11.703547719 | 9.783300907  | 4.438700738  |
| O | 7.758467938  | 9.785806593  | 7.396147701  |
| O | 7.759354423  | 9.784134231  | 10.355829749 |
| O | 11.703685141 | 9.785574420  | 7.397787520  |
| O | 11.703789960 | 9.788776269  | 10.353824159 |
| O | 9.727861876  | 11.078680934 | 2.959489107  |
| O | 9.726408040  | 11.079671778 | 0.002285242  |
| O | 3.235493844  | 11.077965840 | 2.959206262  |
| O | 3.237401379  | 11.079462108 | 0.002305352  |
| O | 3.235975728  | 11.078192298 | 8.873562178  |
| O | 3.235172891  | 11.077651156 | 5.916002242  |
| O | 9.727438052  | 11.078799878 | 8.873960481  |
| O | 9.728754077  | 11.078498767 | 5.916637965  |
| O | 6.461943846  | 11.795621108 | 8.887575404  |
| O | -0.032724502 | 11.820582242 | 2.964251941  |

|   |              |              |              |
|---|--------------|--------------|--------------|
| O | 6.464619149  | 11.803611086 | 0.004356723  |
| O | 6.461504825  | 11.792624287 | 5.920065355  |
| O | -0.032721905 | 11.826203694 | 0.005154985  |
| O | -0.033331859 | 11.820119324 | 5.921112629  |
| O | 6.460495985  | 11.794430595 | 2.951678259  |
| O | -0.032019860 | 11.826387647 | 8.875222936  |
| O | 8.433630957  | 13.105820938 | 1.484081403  |
| O | 8.430536376  | 13.096808326 | 4.440026363  |
| O | 10.974219715 | 13.125697475 | 1.485131162  |
| O | 10.974525861 | 13.128116721 | 4.440820957  |
| O | 1.945769389  | 13.108437353 | 1.485371540  |
| O | 1.945209702  | 13.110436901 | 4.439273763  |
| O | 4.486767554  | 13.122615642 | 1.482586852  |
| O | 4.489068910  | 13.111927454 | 4.439939770  |
| O | 1.946701855  | 13.111888163 | 7.393996961  |
| O | 1.946260626  | 13.108313051 | 10.353127040 |
| O | 4.489049037  | 13.111006976 | 7.396186384  |
| O | 4.486944721  | 13.121880546 | 10.353933346 |
| O | 8.430976306  | 13.096832258 | 7.397485156  |
| O | 8.434090111  | 13.106260996 | 10.353288396 |
| O | 10.973014484 | 13.130197709 | 7.394108633  |
| O | 10.973284911 | 13.127277326 | 10.354179165 |

|   |              |              |              |
|---|--------------|--------------|--------------|
| O | -0.036901830 | 14.442571752 | 2.964892632  |
| O | -0.035438252 | 14.444180535 | 5.915590217  |
| O | -0.035992095 | 14.444324839 | 8.874921636  |
| O | -0.034678797 | 14.443665467 | 0.012148289  |
| O | 6.455018478  | 14.413994787 | 2.974851381  |
| O | 6.460826420  | 14.406728476 | 5.920433374  |
| O | 6.454249021  | 14.415445334 | 8.866074160  |
| O | 6.463016202  | 14.437778980 | 0.006351785  |
| O | 9.681356257  | 15.124082991 | 8.877480852  |
| O | 3.201975466  | 15.121591235 | 8.876836020  |
| O | 9.674943167  | 15.122528501 | 5.922736952  |
| O | 9.681074140  | 15.120207839 | 2.967421564  |
| O | 3.202472937  | 15.119224139 | 2.966097950  |
| O | 9.690535442  | 15.122359193 | 0.006731397  |
| O | 3.186658943  | 15.121397281 | 0.003795645  |
| O | 3.205798070  | 15.118770865 | 5.921539796  |
| O | 1.232413713  | 16.481349712 | 10.355048286 |
| O | 5.166714478  | 16.480137410 | 4.453464906  |
| O | 5.166437817  | 16.482081594 | 7.390922567  |
| O | 7.721408683  | 16.456023173 | 1.486358956  |
| O | 7.715034300  | 16.480293859 | 4.443472562  |
| O | 5.156837795  | 16.451998359 | 10.365796897 |

|   |              |              |              |
|---|--------------|--------------|--------------|
| O | 11.647489487 | 16.478066781 | 1.487148227  |
| O | 11.644929265 | 16.466362031 | 4.445383397  |
| O | 1.236329316  | 16.471082293 | 4.443264952  |
| O | 1.233971849  | 16.481775125 | 1.487816481  |
| O | 5.157635307  | 16.448625060 | 1.480300545  |
| O | 7.714372001  | 16.482629880 | 7.401336637  |
| O | 7.721696645  | 16.459660079 | 10.358626030 |
| O | 1.235561418  | 16.475357497 | 7.399174896  |
| O | 11.645842897 | 16.474118406 | 7.397745407  |
| O | 11.648502094 | 16.478842954 | 10.356787947 |
| O | 3.201336028  | 17.758287318 | 8.872405362  |
| O | 3.209114111  | 17.757789039 | 0.010856379  |
| O | 9.662248044  | 17.754297509 | 2.968411701  |
| O | 9.658427258  | 17.761151623 | 5.924111906  |
| O | 3.204943277  | 17.752956976 | 2.969155902  |
| O | 3.194164392  | 17.753492760 | 5.920570124  |
| O | 9.668613075  | 17.757761535 | 8.876945562  |
| O | 9.654166672  | 17.759501763 | 0.009220227  |
| O | 6.444631724  | 18.577968835 | 0.014961487  |
| O | 6.482764893  | 18.654642828 | 5.925837490  |
| O | -0.050670867 | 18.520845623 | 0.007036483  |
| O | 6.433089227  | 18.472766455 | 2.883653919  |

|   |              |              |              |
|---|--------------|--------------|--------------|
| O | -0.054507239 | 18.526036662 | 5.919445011  |
| O | 6.429090106  | 18.471749179 | 8.970265610  |
| O | -0.055073032 | 18.530691558 | 8.864970222  |
| O | -0.059456102 | 18.521980772 | 2.983372123  |
| O | 1.971545014  | 20.000089784 | 4.452153832  |
| O | 4.444330157  | 19.992577726 | 1.513052685  |
| O | 4.498001697  | 19.966068175 | 4.460545514  |
| O | 1.976564016  | 20.004831477 | 7.385201417  |
| O | 1.963566773  | 19.954079459 | 10.357980252 |
| O | 4.499497487  | 19.965096262 | 7.384620111  |
| O | 4.443931271  | 19.987199163 | 10.339728362 |
| O | 8.428868224  | 20.033852787 | 1.520879977  |
| O | 8.385993364  | 20.030473057 | 4.450502775  |
| O | 10.911447053 | 19.924451284 | 1.490308386  |
| O | 10.906483772 | 19.935700618 | 4.461614436  |
| O | 8.377672479  | 20.027763773 | 7.399976115  |
| O | 8.420323152  | 20.025127713 | 10.332756942 |
| O | 10.897332124 | 19.971195277 | 7.384179222  |
| O | 10.902093428 | 19.954537376 | 10.365423200 |
| O | 1.959134215  | 19.961114668 | 1.500783734  |
| O | -0.054365532 | 21.113797751 | 0.033080885  |
| O | 6.430583298  | 21.189163357 | 3.068548556  |



|   |              |              |              |
|---|--------------|--------------|--------------|
| O | -0.087591142 | 21.146354167 | 2.976658234  |
| O | -0.059340112 | 21.169944406 | 5.905619521  |
| O | -0.060075668 | 21.122948952 | 8.867412916  |
| O | 6.427251801  | 21.186805548 | 8.791639833  |
| O | 6.425733020  | 21.188753303 | 0.015069491  |
| H | 0.000000000  | 0.932897449  | 9.814799089  |
| H | 0.816399334  | 0.932897449  | 8.400899272  |
| H | 6.457698847  | 0.932897449  | 6.856699960  |
| H | 0.834099172  | 0.932897449  | -0.439201108 |
| H | 0.000000000  | 0.932897449  | 3.899999089  |
| H | 0.816399334  | 0.932897449  | 2.486099272  |
| H | 6.457698847  | 0.932897449  | 0.941899960  |
| H | 0.834099172  | 0.932897449  | 5.475598892  |
| H | 6.494400000  | 0.932897449  | 9.814799089  |
| H | 7.310799334  | 0.932897449  | 8.400899272  |
| H | -0.036701153 | 0.932897449  | 6.856699960  |
| H | 7.328499172  | 0.932897449  | -0.439201108 |
| H | 6.494400000  | 0.932897449  | 3.899999089  |
| H | 7.310799334  | 0.932897449  | 2.486099272  |
| H | -0.036701153 | 0.932897449  | 0.941899960  |
| H | 7.328499172  | 0.932897449  | 5.475598892  |
| H | 7.275362900  | 21.677607826 | 3.100554603  |

|   |             |              |             |
|---|-------------|--------------|-------------|
| H | 7.267474542 | 21.681225801 | 8.765470273 |
| H | 0.590932470 | 21.840496349 | 2.966982567 |
| H | 0.723496552 | 21.748476414 | 5.905943060 |

TS14-E1:

|    |             |             |              |
|----|-------------|-------------|--------------|
| Ti | 3.247200000 | 3.247190143 | 1.478700000  |
| Ti | 3.247200000 | 3.247190143 | 4.436100000  |
| Ti | 0.000000000 | 3.247190143 | 2.957400000  |
| Ti | 0.000000000 | 3.247190143 | 0.000000000  |
| Ti | 3.247200000 | 3.247190143 | 7.393500000  |
| Ti | 3.247200000 | 3.247190143 | 10.350900000 |
| Ti | 0.000000000 | 3.247190143 | 8.872200000  |
| Ti | 0.000000000 | 3.247190143 | 5.914800000  |
| Ti | 9.741600000 | 3.247190143 | 1.478700000  |
| Ti | 9.741600000 | 3.247190143 | 4.436100000  |
| Ti | 6.494400000 | 3.247190143 | 2.957400000  |
| Ti | 6.494400000 | 3.247190143 | 0.000000000  |
| Ti | 9.741600000 | 3.247190143 | 7.393500000  |
| Ti | 9.741600000 | 3.247190143 | 10.350900000 |
| Ti | 6.494400000 | 3.247190143 | 8.872200000  |
| Ti | 6.494400000 | 3.247190143 | 5.914800000  |
| Ti | 0.000000000 | 6.494389931 | 4.436100000  |
| Ti | 0.000000000 | 6.494389931 | 1.478700000  |

|    |              |             |              |
|----|--------------|-------------|--------------|
| Ti | 3.247200000  | 6.494389931 | 2.957400000  |
| Ti | 3.247200000  | 6.494389931 | 0.000000000  |
| Ti | 0.000000000  | 6.494389931 | 10.350900000 |
| Ti | 0.000000000  | 6.494389931 | 7.393500000  |
| Ti | 3.247200000  | 6.494389931 | 8.872200000  |
| Ti | 3.247200000  | 6.494389931 | 5.914800000  |
| Ti | 6.494400000  | 6.494389931 | 4.436100000  |
| Ti | 6.494400000  | 6.494389931 | 1.478700000  |
| Ti | 9.741600000  | 6.494389931 | 2.957400000  |
| Ti | 9.741600000  | 6.494389931 | 0.000000000  |
| Ti | 6.494400000  | 6.494389931 | 10.350900000 |
| Ti | 6.494400000  | 6.494389931 | 7.393500000  |
| Ti | 9.741600000  | 6.494389931 | 8.872200000  |
| Ti | 9.741600000  | 6.494389931 | 5.914800000  |
| Ti | 3.227911632  | 9.743656418 | 1.478222676  |
| Ti | 3.230724487  | 9.743855015 | 4.436955398  |
| Ti | -0.015177153 | 9.768779001 | 2.961880698  |
| Ti | -0.019304994 | 9.796158309 | 0.002351133  |
| Ti | 3.233223142  | 9.742468047 | 7.394535327  |
| Ti | 3.232389261  | 9.746258188 | 10.352502556 |
| Ti | -0.009325958 | 9.793080762 | 8.875484370  |
| Ti | -0.020314094 | 9.788844492 | 5.919189373  |

|    |              |              |              |
|----|--------------|--------------|--------------|
| Ti | 9.727850576  | 9.741718306  | 1.480935085  |
| Ti | 9.723117197  | 9.750690198  | 4.436141404  |
| Ti | 6.476710164  | 9.755695141  | 2.960575774  |
| Ti | 6.477917862  | 9.759158452  | 0.007794878  |
| Ti | 9.728008260  | 9.742172652  | 7.391745907  |
| Ti | 9.729831368  | 9.744375084  | 10.350871727 |
| Ti | 6.482780869  | 9.757455015  | 8.884854951  |
| Ti | 6.476628724  | 9.733141109  | 5.924635721  |
| Ti | -0.036403840 | 13.113835204 | 1.472234177  |
| Ti | -0.035855453 | 13.074444677 | 4.457396001  |
| Ti | 3.211283370  | 13.000773221 | 2.958057726  |
| Ti | 3.211460278  | 13.003296052 | 5.915847984  |
| Ti | 6.457310092  | 13.123244653 | 1.437097190  |
| Ti | 6.458682489  | 13.002476302 | 4.413809958  |
| Ti | 9.705233958  | 13.007732706 | 2.958209854  |
| Ti | 9.704968467  | 13.008885357 | 5.915822906  |
| Ti | -0.036365523 | 13.137945869 | 7.443839562  |
| Ti | -0.037877809 | 13.173713421 | 10.364850056 |
| Ti | 3.210982809  | 13.001723703 | 8.872853467  |
| Ti | 3.207196055  | 13.007223711 | 0.000137697  |
| Ti | 6.458731067  | 13.006889738 | 7.427204541  |
| Ti | 6.457591559  | 13.133038082 | 10.397567181 |

|    |              |              |              |
|----|--------------|--------------|--------------|
| Ti | 9.705393460  | 13.001667267 | 8.872346214  |
| Ti | 9.705238114  | 13.001633334 | 0.000233989  |
| Ti | 9.688048217  | 16.316456997 | 1.481340248  |
| Ti | 9.678026189  | 16.335766318 | 4.441175017  |
| Ti | 6.422974978  | 16.307410810 | 2.944970758  |
| Ti | -0.054620372 | 16.399212860 | 5.927084448  |
| Ti | 3.178137901  | 16.317270318 | 1.482789256  |
| Ti | 3.183111572  | 16.322579230 | 4.440360076  |
| Ti | -0.066165856 | 16.385747164 | 2.961530187  |
| Ti | 6.449441867  | 16.254249547 | 5.921030414  |
| Ti | 3.199449145  | 16.319479894 | 7.401752920  |
| Ti | 3.188742737  | 16.332669125 | 10.356002580 |
| Ti | -0.056771317 | 16.564254165 | 8.874563199  |
| Ti | 6.443398957  | 16.577415536 | 0.012544463  |
| Ti | 9.675480773  | 16.334053593 | 7.395039622  |
| Ti | 9.687849358  | 16.323932621 | 10.351926336 |
| Ti | 6.431394708  | 16.323577575 | 8.896286012  |
| Ti | -0.051265625 | 16.515144148 | -0.001131501 |
| Ti | 6.424790943  | 19.590305282 | 7.589024124  |
| Ti | 6.429630310  | 19.967654812 | 10.529116118 |
| Ti | 3.205433994  | 19.582563909 | 8.891300427  |
| Ti | 3.222205652  | 19.581466980 | 0.013105659  |

|    |              |              |              |
|----|--------------|--------------|--------------|
| Ti | 6.463162066  | 20.062416179 | 1.505875312  |
| Ti | 6.283983908  | 19.488613363 | 4.291232707  |
| Ti | 3.168522942  | 19.571007392 | 2.952169542  |
| Ti | 3.158914217  | 19.560627816 | 5.948472838  |
| Ti | -0.041639625 | 19.858033638 | 1.377067175  |
| Ti | -0.087012621 | 19.679930618 | 4.443926108  |
| Ti | 9.770116391  | 19.568673515 | 2.918650489  |
| Ti | 9.646296758  | 19.609905712 | 5.951950504  |
| Ti | -0.077864609 | 19.905039451 | 7.489456155  |
| Ti | -0.048825679 | 20.004404993 | 10.358809507 |
| Ti | 9.675235025  | 19.581286242 | 8.878757502  |
| Ti | 9.655551278  | 19.573307337 | -0.021634209 |
| O  | 0.000000000  | 1.266689833  | 2.957400000  |
| O  | 0.000000000  | 1.266689833  | 0.000000000  |
| O  | 0.000000000  | 1.266689833  | 8.872200000  |
| O  | 0.000000000  | 1.266689833  | 5.914800000  |
| O  | 6.494400000  | 1.266689833  | 2.957400000  |
| O  | 6.494400000  | 1.266689833  | 0.000000000  |
| O  | 6.494400000  | 1.266689833  | 8.872200000  |
| O  | 6.494400000  | 1.266689833  | 5.914800000  |
| O  | 9.741600000  | 1.980499953  | 8.872200000  |
| O  | 9.741600000  | 1.980499953  | 5.914800000  |

|   |              |             |              |
|---|--------------|-------------|--------------|
| O | 9.741600000  | 1.980499953 | 2.957400000  |
| O | 9.741600000  | 1.980499953 | 0.000000000  |
| O | 3.247200000  | 1.980499953 | 8.872200000  |
| O | 3.247200000  | 1.980499953 | 5.914800000  |
| O | 3.247200000  | 1.980499953 | 2.957400000  |
| O | 3.247200000  | 1.980499953 | 0.000000000  |
| O | 1.266699988  | 3.247190143 | 1.478700000  |
| O | 1.266699988  | 3.247190143 | 4.436100000  |
| O | 5.227599998  | 3.247190143 | 1.478700000  |
| O | 5.227599998  | 3.247190143 | 4.436100000  |
| O | 1.266699988  | 3.247190143 | 7.393500000  |
| O | 1.266699988  | 3.247190143 | 10.350900000 |
| O | 5.227599998  | 3.247190143 | 7.393500000  |
| O | 5.227599998  | 3.247190143 | 10.350900000 |
| O | 7.761099988  | 3.247190143 | 1.478700000  |
| O | 7.761099988  | 3.247190143 | 4.436100000  |
| O | 11.721999998 | 3.247190143 | 1.478700000  |
| O | 11.721999998 | 3.247190143 | 4.436100000  |
| O | 7.761099988  | 3.247190143 | 7.393500000  |
| O | 7.761099988  | 3.247190143 | 10.350900000 |
| O | 11.721999998 | 3.247190143 | 7.393500000  |
| O | 11.721999998 | 3.247190143 | 10.350900000 |

|   |              |             |              |
|---|--------------|-------------|--------------|
| O | 9.741600000  | 4.513899978 | 8.872200000  |
| O | 9.741600000  | 4.513899978 | 5.914800000  |
| O | 9.741600000  | 4.513899978 | 2.957400000  |
| O | 9.741600000  | 4.513899978 | 0.000000000  |
| O | 3.247200000  | 4.513899978 | 8.872200000  |
| O | 3.247200000  | 4.513899978 | 5.914800000  |
| O | 3.247200000  | 4.513899978 | 2.957400000  |
| O | 3.247200000  | 4.513899978 | 0.000000000  |
| O | 0.000000000  | 5.227600085 | 2.957400000  |
| O | 0.000000000  | 5.227600085 | 0.000000000  |
| O | 0.000000000  | 5.227600085 | 8.872200000  |
| O | 0.000000000  | 5.227600085 | 5.914800000  |
| O | 6.494400000  | 5.227600085 | 0.000000000  |
| O | 6.494400000  | 5.227600085 | 2.957400000  |
| O | 6.494400000  | 5.227600085 | 8.872200000  |
| O | 6.494400000  | 5.227600085 | 5.914800000  |
| O | 8.474900012  | 6.494389931 | 7.393500000  |
| O | 11.008299988 | 6.494389931 | 7.393500000  |
| O | 8.474900012  | 6.494389931 | 10.350900000 |
| O | 11.008299988 | 6.494389931 | 10.350900000 |
| O | 8.474900012  | 6.494389931 | 1.478700000  |
| O | 11.008299988 | 6.494389931 | 1.478700000  |



|   |              |             |              |
|---|--------------|-------------|--------------|
| O | 8.474900012  | 6.494389931 | 4.436100000  |
| O | 11.008299988 | 6.494389931 | 4.436100000  |
| O | 1.980500012  | 6.494389931 | 1.478700000  |
| O | 4.513899988  | 6.494389931 | 1.478700000  |
| O | 1.980500012  | 6.494389931 | 4.436100000  |
| O | 4.513899988  | 6.494389931 | 4.436100000  |
| O | 1.980500012  | 6.494389931 | 7.393500000  |
| O | 4.513899988  | 6.494389931 | 7.393500000  |
| O | 1.980500012  | 6.494389931 | 10.350900000 |
| O | 4.513899988  | 6.494389931 | 10.350900000 |
| O | 0.000000000  | 7.761090122 | 8.872200000  |
| O | 0.000000000  | 7.761090122 | 5.914800000  |
| O | 6.494400000  | 7.761090122 | 2.957400000  |
| O | 6.494400000  | 7.761090122 | 0.000000000  |
| O | 0.000000000  | 7.761090122 | 2.957400000  |
| O | 0.000000000  | 7.761090122 | 0.000000000  |
| O | 6.494400000  | 7.761090122 | 8.872200000  |
| O | 6.494400000  | 7.761090122 | 5.914800000  |
| O | 3.247200000  | 8.474889884 | 2.957400000  |
| O | 3.247200000  | 8.474889884 | 0.000000000  |
| O | 3.247200000  | 8.474889884 | 8.872200000  |
| O | 3.247200000  | 8.474889884 | 5.914800000  |

|   |              |              |              |
|---|--------------|--------------|--------------|
| O | 9.741600000  | 8.474889884  | 2.957400000  |
| O | 9.741600000  | 8.474889884  | 0.000000000  |
| O | 9.741600000  | 8.474889884  | 8.872200000  |
| O | 9.741600000  | 8.474889884  | 5.914800000  |
| O | 1.261891534  | 9.795712893  | 1.482362799  |
| O | 1.262025449  | 9.794156260  | 4.438477276  |
| O | 5.207640888  | 9.775705267  | 1.480970100  |
| O | 5.207746487  | 9.776333207  | 4.440849821  |
| O | 1.262878164  | 9.794829563  | 7.395048140  |
| O | 1.263395897  | 9.797732087  | 10.355770128 |
| O | 5.208582706  | 9.775042323  | 7.398926001  |
| O | 5.208408656  | 9.776962218  | 10.355743866 |
| O | 7.757016439  | 9.784756098  | 1.481405903  |
| O | 7.756156321  | 9.784579646  | 4.440990948  |
| O | 11.702040239 | 9.788928789  | 1.482926716  |
| O | 11.701541859 | 9.786412030  | 4.437748810  |
| O | 7.757861101  | 9.784321041  | 7.397093004  |
| O | 7.758460534  | 9.784230672  | 10.356854429 |
| O | 11.703061289 | 9.786988177  | 7.397695368  |
| O | 11.702913476 | 9.788503018  | 10.353460635 |
| O | 9.726944867  | 11.079074557 | 2.959004685  |
| O | 9.724614676  | 11.078719868 | 0.002324990  |

|   |              |              |             |
|---|--------------|--------------|-------------|
| O | 3.234401096  | 11.075856635 | 2.958905435 |
| O | 3.235818304  | 11.078616640 | 0.002995018 |
| O | 3.235333432  | 11.076316695 | 8.872556308 |
| O | 3.234225228  | 11.076152745 | 5.916399362 |
| O | 9.727571836  | 11.077964411 | 8.872848499 |
| O | 9.726280230  | 11.079822512 | 5.916829723 |
| O | 6.460216206  | 11.796881274 | 8.888001861 |
| O | -0.036241350 | 11.824527045 | 2.962423676 |
| O | 6.462528083  | 11.811435684 | 0.003112604 |
| O | 6.460681984  | 11.789838207 | 5.921967673 |
| O | -0.036408386 | 11.827811405 | 0.006461564 |
| O | -0.035428381 | 11.821203395 | 5.918306293 |
| O | 6.459198663  | 11.794123055 | 2.949472748 |
| O | -0.034970526 | 11.826932718 | 8.874974751 |
| O | 8.432602244  | 13.106179913 | 1.486106158 |
| O | 8.428350620  | 13.096067515 | 4.438830745 |
| O | 10.971317368 | 13.128540706 | 1.481622503 |
| O | 10.971448035 | 13.132495153 | 4.441152540 |
| O | 1.943016803  | 13.108284118 | 1.484346741 |
| O | 1.943669360  | 13.112049255 | 4.439162210 |
| O | 4.482690110  | 13.121541573 | 1.482890872 |
| O | 4.487173844  | 13.105473035 | 4.439830583 |

|   |              |              |              |
|---|--------------|--------------|--------------|
| O | 1.944846925  | 13.111231291 | 7.393433163  |
| O | 1.943849125  | 13.103270246 | 10.352558155 |
| O | 4.487113835  | 13.109650012 | 7.396060517  |
| O | 4.482899879  | 13.118430450 | 10.351820225 |
| O | 8.428776004  | 13.098809660 | 7.396838668  |
| O | 8.433576274  | 13.104787231 | 10.347754154 |
| O | 10.971013300 | 13.131271421 | 7.391061091  |
| O | 10.970738327 | 13.125788201 | 10.354255229 |
| O | -0.042225809 | 14.446530486 | 2.963364721  |
| O | -0.036922742 | 14.446624784 | 5.916063165  |
| O | -0.039314890 | 14.442364582 | 8.876633734  |
| O | -0.035112103 | 14.448904012 | 0.007652568  |
| O | 6.445900470  | 14.406298777 | 2.978596632  |
| O | 6.456413735  | 14.401238470 | 5.918126129  |
| O | 6.447898018  | 14.416080061 | 8.865893404  |
| O | 6.463871644  | 14.430305499 | 0.004539491  |
| O | 9.683325359  | 15.126057178 | 8.869640666  |
| O | 3.202069245  | 15.120516094 | 8.882409418  |
| O | 9.667962336  | 15.128338906 | 5.919320208  |
| O | 9.679788119  | 15.121627311 | 2.967877122  |
| O | 3.200707110  | 15.116225173 | 2.968170496  |
| O | 9.686736088  | 15.120241415 | -0.000678191 |

|   |              |              |              |
|---|--------------|--------------|--------------|
| O | 3.176516249  | 15.120083537 | -0.002114068 |
| O | 3.206652993  | 15.116749528 | 5.919907666  |
| O | 1.232336299  | 16.488297410 | 10.350189751 |
| O | 5.161283861  | 16.500456148 | 4.459866968  |
| O | 5.165294673  | 16.483084583 | 7.391245751  |
| O | 7.718353458  | 16.451682604 | 1.487066485  |
| O | 7.707938388  | 16.480487813 | 4.434766449  |
| O | 5.156907545  | 16.462402582 | 10.373037204 |
| O | 11.642619336 | 16.481883711 | 1.482072737  |
| O | 11.638593588 | 16.470722603 | 4.448228297  |
| O | 1.230561120  | 16.472988615 | 4.438358152  |
| O | 1.228407707  | 16.484126148 | 1.489841590  |
| O | 5.151320283  | 16.426627529 | 1.466507231  |
| O | 7.710714485  | 16.472556415 | 7.406380423  |
| O | 7.718640380  | 16.459325393 | 10.362515366 |
| O | 1.233392938  | 16.469534233 | 7.400811166  |
| O | 11.641376568 | 16.482147317 | 7.393216681  |
| O | 11.646179826 | 16.480017394 | 10.352326650 |
| O | 3.204376706  | 17.757216821 | 8.871737226  |
| O | 3.219633740  | 17.758491988 | 0.018231898  |
| O | 9.668941432  | 17.756017020 | 2.963642598  |
| O | 9.635458903  | 17.787329345 | 5.916240964  |

|   |              |              |              |
|---|--------------|--------------|--------------|
| O | 3.198256253  | 17.749109328 | 2.962514409  |
| O | 3.176784208  | 17.747326951 | 5.927774350  |
| O | 9.660017997  | 17.759568915 | 8.869989284  |
| O | 9.654672586  | 17.751202460 | 0.000467861  |
| O | 6.454997696  | 18.593506232 | 0.042276506  |
| O | 6.533625007  | 18.648138046 | 5.951724440  |
| O | -0.042944220 | 18.514883055 | 0.000198619  |
| O | 6.383837386  | 18.437601840 | 2.844319907  |
| O | -0.047333395 | 18.526506723 | 5.915270227  |
| O | 6.437105494  | 18.477436354 | 8.984287944  |
| O | -0.051599956 | 18.529982894 | 8.860345676  |
| O | -0.069663221 | 18.519796914 | 2.980369416  |
| O | 1.959057062  | 20.000521626 | 4.451705727  |
| O | 4.450611541  | 20.028006662 | 1.534297109  |
| O | 4.448146266  | 19.951263732 | 4.471124725  |
| O | 1.970797118  | 20.011585578 | 7.409482736  |
| O | 1.977739892  | 19.952586406 | 10.364259877 |
| O | 4.499027812  | 19.952691419 | 7.374137547  |
| O | 4.464369927  | 19.996611470 | 10.347619179 |
| O | 8.459569981  | 19.989951667 | 1.513202448  |
| O | 8.397488193  | 20.162362512 | 4.393063087  |
| O | 10.935371513 | 19.925458202 | 1.455233977  |

|   |              |              |              |
|---|--------------|--------------|--------------|
| O | 10.900769220 | 19.938782808 | 4.465214657  |
| O | 8.372757647  | 20.062091493 | 7.401961949  |
| O | 8.419217806  | 20.037850811 | 10.332105368 |
| O | 10.899222384 | 19.975221520 | 7.367986037  |
| O | 10.911394318 | 19.946707063 | 10.349529659 |
| O | 1.959940040  | 19.963251377 | 1.488894986  |
| O | -0.045012946 | 21.108131650 | 0.023626432  |
| O | 6.596136724  | 21.048103056 | 3.176646849  |
| O | -0.090776645 | 21.135991735 | 2.971399267  |
| O | -0.051878176 | 21.170375534 | 5.903039012  |
| O | -0.062082567 | 21.121596274 | 8.865153817  |
| O | 6.420558023  | 21.186905561 | 8.816440589  |
| O | 6.444797721  | 21.210776908 | 0.055081102  |
| H | 0.000000000  | 0.932899949  | 9.814800036  |
| H | 0.816399984  | 0.932899949  | 8.400899982  |
| H | 6.457700016  | 0.932899949  | 6.856699960  |
| H | 0.834099951  | 0.932899949  | -0.439200043 |
| H | 0.000000000  | 0.932899949  | 3.900000036  |
| H | 0.816399984  | 0.932899949  | 2.486099982  |
| H | 6.457700016  | 0.932899949  | 0.941899960  |
| H | 0.834099951  | 0.932899949  | 5.475599957  |
| H | 6.494400000  | 0.932899949  | 9.814800036  |

|   |              |              |              |
|---|--------------|--------------|--------------|
| H | 7.310799984  | 0.932899949  | 8.400899982  |
| H | -0.036699984 | 0.932899949  | 6.856699960  |
| H | 7.328499951  | 0.932899949  | -0.439200043 |
| H | 6.494400000  | 0.932899949  | 3.900000036  |
| H | 7.310799984  | 0.932899949  | 2.486099982  |
| H | -0.036699984 | 0.932899949  | 0.941899960  |
| H | 7.328499951  | 0.932899949  | 5.475599957  |
| H | 7.739403627  | 20.889686549 | 3.782337866  |
| H | 7.256865161  | 21.686553643 | 8.775745227  |
| H | 0.549971510  | 21.865855034 | 2.966993214  |
| H | 0.737472891  | 21.739619537 | 5.891705545  |

14-Eb:

|    |             |             |              |
|----|-------------|-------------|--------------|
| Ti | 3.247200000 | 3.247194072 | 1.478700000  |
| Ti | 3.247200000 | 3.247194072 | 4.436100000  |
| Ti | 0.000000000 | 3.247194072 | 2.957400000  |
| Ti | 0.000000000 | 3.247194072 | 0.000000000  |
| Ti | 3.247200000 | 3.247194072 | 7.393500000  |
| Ti | 3.247200000 | 3.247194072 | 10.350900000 |
| Ti | 0.000000000 | 3.247194072 | 8.872200000  |
| Ti | 0.000000000 | 3.247194072 | 5.914800000  |
| Ti | 9.741600000 | 3.247194072 | 1.478700000  |
| Ti | 9.741600000 | 3.247194072 | 4.436100000  |



|    |             |             |              |
|----|-------------|-------------|--------------|
| Ti | 6.494400000 | 3.247194072 | 2.957400000  |
| Ti | 6.494400000 | 3.247194072 | 0.000000000  |
| Ti | 9.741600000 | 3.247194072 | 7.393500000  |
| Ti | 9.741600000 | 3.247194072 | 10.350900000 |
| Ti | 6.494400000 | 3.247194072 | 8.872200000  |
| Ti | 6.494400000 | 3.247194072 | 5.914800000  |
| Ti | 0.000000000 | 6.494391717 | 4.436100000  |
| Ti | 0.000000000 | 6.494391717 | 1.478700000  |
| Ti | 3.247200000 | 6.494391717 | 2.957400000  |
| Ti | 3.247200000 | 6.494391717 | 0.000000000  |
| Ti | 0.000000000 | 6.494391717 | 10.350900000 |
| Ti | 0.000000000 | 6.494391717 | 7.393500000  |
| Ti | 3.247200000 | 6.494391717 | 8.872200000  |
| Ti | 3.247200000 | 6.494391717 | 5.914800000  |
| Ti | 6.494400000 | 6.494391717 | 4.436100000  |
| Ti | 6.494400000 | 6.494391717 | 1.478700000  |
| Ti | 9.741600000 | 6.494391717 | 2.957400000  |
| Ti | 9.741600000 | 6.494391717 | 0.000000000  |
| Ti | 6.494400000 | 6.494391717 | 10.350900000 |
| Ti | 6.494400000 | 6.494391717 | 7.393500000  |
| Ti | 9.741600000 | 6.494391717 | 8.872200000  |
| Ti | 9.741600000 | 6.494391717 | 5.914800000  |

|    |              |              |              |
|----|--------------|--------------|--------------|
| Ti | 3.227821230  | 9.744954445  | 1.478825985  |
| Ti | 3.230236497  | 9.742982044  | 4.436186001  |
| Ti | -0.017414344 | 9.763358647  | 2.960247266  |
| Ti | -0.016401218 | 9.789391349  | 0.000279770  |
| Ti | 3.233373422  | 9.741987984  | 7.393582097  |
| Ti | 3.232303795  | 9.742749156  | 10.352240057 |
| Ti | -0.013939190 | 9.800541384  | 8.875868950  |
| Ti | -0.016193786 | 9.764582736  | 5.920680139  |
| Ti | 9.727710946  | 9.741943336  | 1.481974670  |
| Ti | 9.724446341  | 9.750496244  | 4.436190023  |
| Ti | 6.476067088  | 9.757230699  | 2.957804217  |
| Ti | 6.478710699  | 9.762149202  | 0.005661528  |
| Ti | 9.727302059  | 9.742830238  | 7.390571937  |
| Ti | 9.727631455  | 9.738914367  | 10.350380562 |
| Ti | 6.480516531  | 9.757961867  | 8.881318256  |
| Ti | 6.478403643  | 9.735547496  | 5.919626359  |
| Ti | -0.037516200 | 13.098757868 | 1.455524157  |
| Ti | -0.036324478 | 13.050102553 | 4.451835142  |
| Ti | 3.211311556  | 13.002115540 | 2.957756308  |
| Ti | 3.211002033  | 13.001969449 | 5.915522907  |
| Ti | 6.458142025  | 13.132255479 | 1.436975936  |
| Ti | 6.457332433  | 13.006154999 | 4.412376920  |

|    |              |              |              |
|----|--------------|--------------|--------------|
| Ti | 9.705267209  | 13.007137271 | 2.958394988  |
| Ti | 9.705210058  | 13.008241344 | 5.915465178  |
| Ti | -0.036684658 | 13.120593234 | 7.441220252  |
| Ti | -0.035745437 | 13.197302945 | 10.361559179 |
| Ti | 3.210739529  | 12.999807023 | 8.872118612  |
| Ti | 3.209779267  | 13.005073428 | 0.000200039  |
| Ti | 6.458313347  | 13.009484007 | 7.427583089  |
| Ti | 6.458083835  | 13.136304939 | 10.399163940 |
| Ti | 9.705046529  | 12.998307897 | 8.872932371  |
| Ti | 9.706467114  | 12.996222624 | -0.000449525 |
| Ti | 9.688799619  | 16.311669940 | 1.479639862  |
| Ti | 9.685045856  | 16.333689616 | 4.440412481  |
| Ti | 6.430743320  | 16.322481717 | 2.947008524  |
| Ti | -0.056046932 | 16.371399566 | 5.928457628  |
| Ti | 3.182613062  | 16.317507492 | 1.479904963  |
| Ti | 3.183856999  | 16.322595303 | 4.438936738  |
| Ti | -0.061447155 | 16.353256470 | 2.960360712  |
| Ti | 6.446564068  | 16.258384375 | 5.915594594  |
| Ti | 3.201024426  | 16.319241649 | 7.398712477  |
| Ti | 3.190613903  | 16.327672755 | 10.353521084 |
| Ti | -0.052714395 | 16.563418341 | 8.875104285  |
| Ti | 6.445467034  | 16.607549848 | 0.011402197  |

|    |              |              |              |
|----|--------------|--------------|--------------|
| Ti | 9.673169936  | 16.322187750 | 7.396062291  |
| Ti | 9.687686609  | 16.322654239 | 10.352173693 |
| Ti | 6.433831537  | 16.330433118 | 8.893661615  |
| Ti | -0.050505520 | 16.541222928 | 0.001807208  |
| Ti | 6.441452066  | 19.591607953 | 7.572795096  |
| Ti | 6.433019347  | 19.968188811 | 10.526182614 |
| Ti | 3.222195261  | 19.580296469 | 8.887549379  |
| Ti | 3.212413786  | 19.575621927 | 0.003583304  |
| Ti | 6.458562472  | 20.106353374 | 1.516729680  |
| Ti | 6.311252724  | 19.592514501 | 4.254165247  |
| Ti | 3.180928025  | 19.570658775 | 2.954132310  |
| Ti | 3.177687319  | 19.559824853 | 5.939326428  |
| Ti | -0.010543139 | 19.868420001 | 1.382989191  |
| Ti | -0.076708735 | 19.668977037 | 4.445750824  |
| Ti | 9.800967389  | 19.563973255 | 2.875998038  |
| Ti | 9.735491367  | 19.585887560 | 6.010992511  |
| Ti | -0.022427501 | 19.905354135 | 7.498516683  |
| Ti | -0.043146586 | 20.020696774 | 10.361293013 |
| Ti | 9.680931783  | 19.573388419 | 8.895937512  |
| Ti | 9.651634765  | 19.569956540 | -0.028119196 |
| O  | 0.000000000  | 1.266694833  | 2.957400000  |
| O  | 0.000000000  | 1.266694833  | 0.000000000  |

|   |             |             |              |
|---|-------------|-------------|--------------|
| O | 0.000000000 | 1.266694833 | 8.872200000  |
| O | 0.000000000 | 1.266694833 | 5.914800000  |
| O | 6.494400000 | 1.266694833 | 2.957400000  |
| O | 6.494400000 | 1.266694833 | 0.000000000  |
| O | 6.494400000 | 1.266694833 | 8.872200000  |
| O | 6.494400000 | 1.266694833 | 5.914800000  |
| O | 9.741600000 | 1.980495667 | 8.872200000  |
| O | 9.741600000 | 1.980495667 | 5.914800000  |
| O | 9.741600000 | 1.980495667 | 2.957400000  |
| O | 9.741600000 | 1.980495667 | 0.000000000  |
| O | 3.247200000 | 1.980495667 | 8.872200000  |
| O | 3.247200000 | 1.980495667 | 5.914800000  |
| O | 3.247200000 | 1.980495667 | 2.957400000  |
| O | 3.247200000 | 1.980495667 | 0.000000000  |
| O | 1.266698949 | 3.247194072 | 1.478700000  |
| O | 1.266698949 | 3.247194072 | 4.436100000  |
| O | 5.227599738 | 3.247194072 | 1.478700000  |
| O | 5.227599738 | 3.247194072 | 4.436100000  |
| O | 1.266698949 | 3.247194072 | 7.393500000  |
| O | 1.266698949 | 3.247194072 | 10.350900000 |
| O | 5.227599738 | 3.247194072 | 7.393500000  |
| O | 5.227599738 | 3.247194072 | 10.350900000 |

|   |              |             |              |
|---|--------------|-------------|--------------|
| O | 7.761098949  | 3.247194072 | 1.478700000  |
| O | 7.761098949  | 3.247194072 | 4.436100000  |
| O | 11.721999738 | 3.247194072 | 1.478700000  |
| O | 11.721999738 | 3.247194072 | 4.436100000  |
| O | 7.761098949  | 3.247194072 | 7.393500000  |
| O | 7.761098949  | 3.247194072 | 10.350900000 |
| O | 11.721999738 | 3.247194072 | 7.393500000  |
| O | 11.721999738 | 3.247194072 | 10.350900000 |
| O | 9.741600000  | 4.513896049 | 8.872200000  |
| O | 9.741600000  | 4.513896049 | 5.914800000  |
| O | 9.741600000  | 4.513896049 | 2.957400000  |
| O | 9.741600000  | 4.513896049 | 0.000000000  |
| O | 3.247200000  | 4.513896049 | 8.872200000  |
| O | 3.247200000  | 4.513896049 | 5.914800000  |
| O | 3.247200000  | 4.513896049 | 2.957400000  |
| O | 3.247200000  | 4.513896049 | 0.000000000  |
| O | 0.000000000  | 5.227596870 | 2.957400000  |
| O | 0.000000000  | 5.227596870 | 0.000000000  |
| O | 0.000000000  | 5.227596870 | 8.872200000  |
| O | 0.000000000  | 5.227596870 | 5.914800000  |
| O | 6.494400000  | 5.227596870 | 0.000000000  |
| O | 6.494400000  | 5.227596870 | 2.957400000  |

|   |              |             |              |
|---|--------------|-------------|--------------|
| O | 6.494400000  | 5.227596870 | 8.872200000  |
| O | 6.494400000  | 5.227596870 | 5.914800000  |
| O | 8.474899752  | 6.494391717 | 7.393500000  |
| O | 11.008298949 | 6.494391717 | 7.393500000  |
| O | 8.474899752  | 6.494391717 | 10.350900000 |
| O | 11.008298949 | 6.494391717 | 10.350900000 |
| O | 8.474899752  | 6.494391717 | 1.478700000  |
| O | 11.008298949 | 6.494391717 | 1.478700000  |
| O | 8.474899752  | 6.494391717 | 4.436100000  |
| O | 11.008298949 | 6.494391717 | 4.436100000  |
| O | 1.980499752  | 6.494391717 | 1.478700000  |
| O | 4.513898949  | 6.494391717 | 1.478700000  |
| O | 1.980499752  | 6.494391717 | 4.436100000  |
| O | 4.513898949  | 6.494391717 | 4.436100000  |
| O | 1.980499752  | 6.494391717 | 7.393500000  |
| O | 4.513898949  | 6.494391717 | 7.393500000  |
| O | 1.980499752  | 6.494391717 | 10.350900000 |
| O | 4.513898949  | 6.494391717 | 10.350900000 |
| O | 0.000000000  | 7.761086550 | 8.872200000  |
| O | 0.000000000  | 7.761086550 | 5.914800000  |
| O | 6.494400000  | 7.761086550 | 2.957400000  |
| O | 6.494400000  | 7.761086550 | 0.000000000  |

|   |             |             |              |
|---|-------------|-------------|--------------|
| O | 0.000000000 | 7.761086550 | 2.957400000  |
| O | 0.000000000 | 7.761086550 | 0.000000000  |
| O | 6.494400000 | 7.761086550 | 8.872200000  |
| O | 6.494400000 | 7.761086550 | 5.914800000  |
| O | 3.247200000 | 8.474887384 | 2.957400000  |
| O | 3.247200000 | 8.474887384 | 0.000000000  |
| O | 3.247200000 | 8.474887384 | 8.872200000  |
| O | 3.247200000 | 8.474887384 | 5.914800000  |
| O | 9.741600000 | 8.474887384 | 2.957400000  |
| O | 9.741600000 | 8.474887384 | 0.000000000  |
| O | 9.741600000 | 8.474887384 | 8.872200000  |
| O | 9.741600000 | 8.474887384 | 5.914800000  |
| O | 1.262010772 | 9.790744027 | 1.480964777  |
| O | 1.262154817 | 9.787669338 | 4.438001372  |
| O | 5.207710249 | 9.777377630 | 1.479642701  |
| O | 5.207972622 | 9.776992936 | 4.438848489  |
| O | 1.262943108 | 9.789561372 | 7.394287260  |
| O | 1.263044810 | 9.795087097 | 10.353038555 |
| O | 5.208541142 | 9.777009010 | 7.396124042  |
| O | 5.208085885 | 9.778830677 | 10.354701560 |
| O | 7.757052678 | 9.785251520 | 1.480224954  |
| O | 7.756498706 | 9.785306527 | 4.438569784  |



|   |              |              |              |
|---|--------------|--------------|--------------|
| O | 11.702483287 | 9.784042076  | 1.480692933  |
| O | 11.702411199 | 9.780811652  | 4.438206024  |
| O | 7.757267513  | 9.784635368  | 7.395716039  |
| O | 7.757873181  | 9.785171153  | 10.354840676 |
| O | 11.702823983 | 9.783117312  | 7.395119709  |
| O | 11.702372363 | 9.787279286  | 10.352361310 |
| O | 9.727057350  | 11.077323256 | 2.958290532  |
| O | 9.724815743  | 11.076311337 | 0.001521287  |
| O | 3.233477722  | 11.075339424 | 2.958781224  |
| O | 3.235170942  | 11.077967269 | 0.001795852  |
| O | 3.233695545  | 11.075600173 | 8.871928866  |
| O | 3.233384203  | 11.075060459 | 5.915702717  |
| O | 9.727176197  | 11.076042373 | 8.872405835  |
| O | 9.726420769  | 11.078111931 | 5.916638202  |
| O | 6.461000859  | 11.799085492 | 8.886014015  |
| O | -0.034495006 | 11.815401919 | 2.961372735  |
| O | 6.462316625  | 11.814270699 | 0.003445253  |
| O | 6.460879284  | 11.792995764 | 5.918674904  |
| O | -0.033774257 | 11.824130208 | 0.002325344  |
| O | -0.034172234 | 11.816118799 | 5.921104704  |
| O | 6.460528197  | 11.798729016 | 2.949683197  |
| O | -0.033488244 | 11.825124624 | 8.873066636  |

|   |              |              |              |
|---|--------------|--------------|--------------|
| O | 8.434143885  | 13.106494955 | 1.484473318  |
| O | 8.429093580  | 13.097756308 | 4.438729010  |
| O | 10.972600531 | 13.121482279 | 1.483183773  |
| O | 10.973393757 | 13.121802678 | 4.439647697  |
| O | 1.943348667  | 13.106545676 | 1.484290787  |
| O | 1.942278130  | 13.107055028 | 4.438417419  |
| O | 4.483013921  | 13.120686460 | 1.483353410  |
| O | 4.487268272  | 13.108258043 | 4.439042258  |
| O | 1.944664302  | 13.113297633 | 7.391995393  |
| O | 1.944069026  | 13.106579966 | 10.351575352 |
| O | 4.487105523  | 13.108469143 | 7.394174524  |
| O | 4.483117052  | 13.118335438 | 10.350274096 |
| O | 8.429428561  | 13.097247670 | 7.395156972  |
| O | 8.434385347  | 13.104376462 | 10.348607424 |
| O | 10.971712097 | 13.129657995 | 7.391244332  |
| O | 10.972851994 | 13.123036769 | 10.352615410 |
| O | -0.042991239 | 14.435048979 | 2.964056634  |
| O | -0.039191106 | 14.439052362 | 5.912085107  |
| O | -0.038664670 | 14.442930371 | 8.871117592  |
| O | -0.036688294 | 14.441465178 | 0.011762644  |
| O | 6.450082214  | 14.416854091 | 2.975946683  |
| O | 6.455464124  | 14.407270333 | 5.916578107  |

|   |              |              |              |
|---|--------------|--------------|--------------|
| O | 6.450426028  | 14.418353931 | 8.862123665  |
| O | 6.460503518  | 14.427826960 | 0.004494893  |
| O | 9.682883220  | 15.120708619 | 8.874005197  |
| O | 3.207897320  | 15.119352370 | 8.877079000  |
| O | 9.673040697  | 15.119924230 | 5.916149284  |
| O | 9.681239748  | 15.117662505 | 2.966706346  |
| O | 3.205527124  | 15.116010860 | 2.965568575  |
| O | 9.691010183  | 15.117993263 | -0.001835008 |
| O | 3.187580888  | 15.117687865 | -0.001290018 |
| O | 3.208982924  | 15.115804761 | 5.916916552  |
| O | 1.233977694  | 16.473162209 | 10.350886159 |
| O | 5.164745376  | 16.501735245 | 4.451107149  |
| O | 5.167883600  | 16.489969415 | 7.386521009  |
| O | 7.721301266  | 16.455757424 | 1.483578645  |
| O | 7.714218214  | 16.486567540 | 4.437396288  |
| O | 5.159856652  | 16.464622516 | 10.370259732 |
| O | 11.644905625 | 16.479807010 | 1.480016634  |
| O | 11.641809615 | 16.463993505 | 4.444431942  |
| O | 1.231599055  | 16.468714839 | 4.438432087  |
| O | 1.231102753  | 16.473263651 | 1.488587889  |
| O | 5.157225511  | 16.449608760 | 1.469924211  |
| O | 7.713372123  | 16.479414458 | 7.396576879  |

|   |              |              |              |
|---|--------------|--------------|--------------|
| O | 7.720737552  | 16.454644778 | 10.361990841 |
| O | 1.235266703  | 16.467117130 | 7.396421911  |
| O | 11.643605316 | 16.477472775 | 7.395861070  |
| O | 11.649672515 | 16.480994665 | 10.353770926 |
| O | 3.205411523  | 17.755563389 | 8.869174107  |
| O | 3.207304121  | 17.752471198 | 0.011346952  |
| O | 9.667126377  | 17.758497346 | 2.962933295  |
| O | 9.658226451  | 17.772744930 | 5.920471110  |
| O | 3.199229894  | 17.750398426 | 2.960995962  |
| O | 3.182922325  | 17.746084645 | 5.923229063  |
| O | 9.662865401  | 17.750956356 | 8.870036721  |
| O | 9.652600093  | 17.748111340 | 0.001868249  |
| O | 6.467433563  | 18.589888257 | 0.022450925  |
| O | 6.528808370  | 18.703874290 | 5.925086665  |
| O | -0.018021830 | 18.521219601 | -0.000106466 |
| O | 6.425367126  | 18.478363261 | 2.855783973  |
| O | -0.060432081 | 18.529086348 | 5.919582826  |
| O | 6.449145982  | 18.472320325 | 8.968250201  |
| O | -0.027796681 | 18.532901134 | 8.865290212  |
| O | -0.074650141 | 18.524791498 | 2.978457871  |
| O | 1.951995701  | 19.982474614 | 4.450515669  |
| O | 4.440897217  | 19.999228599 | 1.501169261  |

|   |              |              |              |
|---|--------------|--------------|--------------|
| O | 4.435903933  | 19.971180275 | 4.469559669  |
| O | 1.986105328  | 20.018233237 | 7.402547515  |
| O | 1.985605130  | 19.963826095 | 10.351970815 |
| O | 4.505705224  | 19.956158303 | 7.376360684  |
| O | 4.468213573  | 19.988912245 | 10.348569096 |
| O | 8.476607000  | 20.019491259 | 1.518100494  |
| O | 8.386862835  | 20.204799510 | 4.487370551  |
| O | 10.958597046 | 19.904689405 | 1.441892081  |
| O | 10.875123484 | 19.954640961 | 4.454504018  |
| O | 8.408177715  | 20.056286088 | 7.397919420  |
| O | 8.425677396  | 20.046808059 | 10.329103844 |
| O | 10.942674336 | 19.965375584 | 7.412927161  |
| O | 10.931881682 | 19.936581448 | 10.358180172 |
| O | 1.967593431  | 19.974864687 | 1.493913220  |
| O | -0.035038197 | 21.120570783 | 0.029252590  |
| O | 6.461175039  | 21.081829626 | 3.100994546  |
| O | -0.098216500 | 21.140853088 | 2.973397760  |
| O | -0.071991463 | 21.165931379 | 5.903306361  |
| O | -0.041597152 | 21.133853240 | 8.867236418  |
| O | 6.434977019  | 21.185881855 | 8.801933832  |
| O | 6.455321117  | 21.222833491 | 0.029136541  |
| H | 0.000000000  | 0.932897449  | 9.814799089  |

|   |              |              |              |
|---|--------------|--------------|--------------|
| H | 0.816399334  | 0.932897449  | 8.400899272  |
| H | 6.457698847  | 0.932897449  | 6.856699960  |
| H | 0.834099172  | 0.932897449  | -0.439201108 |
| H | 0.000000000  | 0.932897449  | 3.899999089  |
| H | 0.816399334  | 0.932897449  | 2.486099272  |
| H | 6.457698847  | 0.932897449  | 0.941899960  |
| H | 0.834099172  | 0.932897449  | 5.475598892  |
| H | 6.494400000  | 0.932897449  | 9.814799089  |
| H | 7.310799334  | 0.932897449  | 8.400899272  |
| H | -0.036701153 | 0.932897449  | 6.856699960  |
| H | 7.328499172  | 0.932897449  | -0.439201108 |
| H | 6.494400000  | 0.932897449  | 3.899999089  |
| H | 7.310799334  | 0.932897449  | 2.486099272  |
| H | -0.036701153 | 0.932897449  | 0.941899960  |
| H | 7.328499172  | 0.932897449  | 5.475598892  |
| H | 8.240016527  | 21.145147223 | 4.250019091  |
| H | 7.272684869  | 21.684610174 | 8.779315874  |
| H | 0.535051015  | 21.875970291 | 2.975849799  |
| H | 0.673165342  | 21.790595871 | 5.886236130  |

TS14-E2:

|    |             |             |             |
|----|-------------|-------------|-------------|
| Ti | 3.247200000 | 3.247190143 | 1.478700000 |
| Ti | 3.247200000 | 3.247190143 | 4.436100000 |

|    |             |             |              |
|----|-------------|-------------|--------------|
| Ti | 0.000000000 | 3.247190143 | 2.957400000  |
| Ti | 0.000000000 | 3.247190143 | 0.000000000  |
| Ti | 3.247200000 | 3.247190143 | 7.393500000  |
| Ti | 3.247200000 | 3.247190143 | 10.350900000 |
| Ti | 0.000000000 | 3.247190143 | 8.872200000  |
| Ti | 0.000000000 | 3.247190143 | 5.914800000  |
| Ti | 9.741600000 | 3.247190143 | 1.478700000  |
| Ti | 9.741600000 | 3.247190143 | 4.436100000  |
| Ti | 6.494400000 | 3.247190143 | 2.957400000  |
| Ti | 6.494400000 | 3.247190143 | 0.000000000  |
| Ti | 9.741600000 | 3.247190143 | 7.393500000  |
| Ti | 9.741600000 | 3.247190143 | 10.350900000 |
| Ti | 6.494400000 | 3.247190143 | 8.872200000  |
| Ti | 6.494400000 | 3.247190143 | 5.914800000  |
| Ti | 0.000000000 | 6.494389931 | 4.436100000  |
| Ti | 0.000000000 | 6.494389931 | 1.478700000  |
| Ti | 3.247200000 | 6.494389931 | 2.957400000  |
| Ti | 3.247200000 | 6.494389931 | 0.000000000  |
| Ti | 0.000000000 | 6.494389931 | 10.350900000 |
| Ti | 0.000000000 | 6.494389931 | 7.393500000  |
| Ti | 3.247200000 | 6.494389931 | 8.872200000  |
| Ti | 3.247200000 | 6.494389931 | 5.914800000  |

|    |              |             |              |
|----|--------------|-------------|--------------|
| Ti | 6.494400000  | 6.494389931 | 4.436100000  |
| Ti | 6.494400000  | 6.494389931 | 1.478700000  |
| Ti | 9.741600000  | 6.494389931 | 2.957400000  |
| Ti | 9.741600000  | 6.494389931 | 0.000000000  |
| Ti | 6.494400000  | 6.494389931 | 10.350900000 |
| Ti | 6.494400000  | 6.494389931 | 7.393500000  |
| Ti | 9.741600000  | 6.494389931 | 8.872200000  |
| Ti | 9.741600000  | 6.494389931 | 5.914800000  |
| Ti | 3.231867501  | 9.740045587 | 1.478646649  |
| Ti | 3.231220009  | 9.740227396 | 4.437850781  |
| Ti | -0.010633151 | 9.779850097 | 2.958037261  |
| Ti | -0.017702046 | 9.794598819 | -0.001347391 |
| Ti | 3.231870229  | 9.744183987 | 7.394004532  |
| Ti | 3.233192359  | 9.740266687 | 10.350714748 |
| Ti | -0.012986982 | 9.805843509 | 8.873981183  |
| Ti | -0.019448000 | 9.782496159 | 5.918446238  |
| Ti | 9.730532893  | 9.742986687 | 1.481239933  |
| Ti | 9.727668863  | 9.745188762 | 4.436828230  |
| Ti | 6.477948776  | 9.774355090 | 2.958918447  |
| Ti | 6.483394850  | 9.785163652 | 0.007515227  |
| Ti | 9.726369983  | 9.739642319 | 7.393659463  |
| Ti | 9.727694450  | 9.742213371 | 10.353135913 |



|    |              |              |              |
|----|--------------|--------------|--------------|
| Ti | 6.477838241  | 9.758022946  | 8.880240343  |
| Ti | 6.479303637  | 9.750992023  | 5.918284409  |
| Ti | -0.035578921 | 13.105909164 | 1.472260912  |
| Ti | -0.036290837 | 13.075441236 | 4.467801199  |
| Ti | 3.210789406  | 12.996468013 | 2.957433596  |
| Ti | 3.210725371  | 13.001449381 | 5.915071371  |
| Ti | 6.459114496  | 13.190251306 | 1.470953268  |
| Ti | 6.456714685  | 13.058179685 | 4.397843665  |
| Ti | 9.705580759  | 13.004464777 | 2.957680007  |
| Ti | 9.705091601  | 13.002380932 | 5.915101891  |
| Ti | -0.036770773 | 13.143300500 | 7.444435537  |
| Ti | -0.037874042 | 13.179944596 | 10.368723422 |
| Ti | 3.210273751  | 13.000463538 | 8.872818097  |
| Ti | 3.210636138  | 12.998220029 | -0.000006033 |
| Ti | 6.456746248  | 13.016303117 | 7.411034543  |
| Ti | 6.456285146  | 13.105439102 | 10.408155737 |
| Ti | 9.705007953  | 12.997160961 | 8.872433398  |
| Ti | 9.706014585  | 13.003465717 | 0.000518018  |
| Ti | 9.693862393  | 16.330700653 | 1.488215375  |
| Ti | 9.694627174  | 16.324033706 | 4.441835936  |
| Ti | 6.454409953  | 16.473968386 | 2.949205518  |
| Ti | -0.056421789 | 16.415084229 | 5.928897216  |

|    |              |              |              |
|----|--------------|--------------|--------------|
| Ti | 3.201394867  | 16.312448614 | 1.479598813  |
| Ti | 3.192472341  | 16.314848929 | 4.440180266  |
| Ti | -0.039520372 | 16.372147879 | 2.958681146  |
| Ti | 6.441762758  | 16.292309542 | 5.912043230  |
| Ti | 3.201816094  | 16.316399847 | 7.399638025  |
| Ti | 3.199125334  | 16.322524937 | 10.353992139 |
| Ti | -0.045775259 | 16.575859974 | 8.878606083  |
| Ti | 6.449882057  | 16.607288385 | 0.000630281  |
| Ti | 9.677288814  | 16.313101557 | 7.396375303  |
| Ti | 9.692461291  | 16.315959432 | 10.356018313 |
| Ti | 6.442554296  | 16.317476417 | 8.885372378  |
| Ti | -0.050707496 | 16.525180465 | 0.004122734  |
| Ti | 6.437890927  | 19.576446321 | 7.504177738  |
| Ti | 6.443940201  | 19.955821116 | 10.500538289 |
| Ti | 3.219053920  | 19.576985677 | 8.886089133  |
| Ti | 3.208828877  | 19.567165102 | 0.006709394  |
| Ti | 6.451595150  | 20.059273266 | 1.535029243  |
| Ti | 6.233526836  | 19.656331449 | 4.326369932  |
| Ti | 3.132017919  | 19.560663177 | 2.939624961  |
| Ti | 3.148138839  | 19.557473830 | 5.949359940  |
| Ti | -0.100521492 | 19.848629904 | 1.409023538  |
| Ti | -0.084141187 | 19.657922372 | 4.445554571  |

|    |              |              |              |
|----|--------------|--------------|--------------|
| Ti | 9.618981701  | 19.590087040 | 3.002868251  |
| Ti | 9.742945899  | 19.542191110 | 5.938163933  |
| Ti | -0.070860398 | 19.913774168 | 7.510137135  |
| Ti | -0.040702613 | 20.008191204 | 10.382207983 |
| Ti | 9.665286254  | 19.567914486 | 8.881009148  |
| Ti | 9.698255465  | 19.573496648 | 0.012191822  |
| O  | 0.000000000  | 1.266689833  | 2.957400000  |
| O  | 0.000000000  | 1.266689833  | 0.000000000  |
| O  | 0.000000000  | 1.266689833  | 8.872200000  |
| O  | 0.000000000  | 1.266689833  | 5.914800000  |
| O  | 6.494400000  | 1.266689833  | 2.957400000  |
| O  | 6.494400000  | 1.266689833  | 0.000000000  |
| O  | 6.494400000  | 1.266689833  | 8.872200000  |
| O  | 6.494400000  | 1.266689833  | 5.914800000  |
| O  | 9.741600000  | 1.980499953  | 8.872200000  |
| O  | 9.741600000  | 1.980499953  | 5.914800000  |
| O  | 9.741600000  | 1.980499953  | 2.957400000  |
| O  | 9.741600000  | 1.980499953  | 0.000000000  |
| O  | 3.247200000  | 1.980499953  | 8.872200000  |
| O  | 3.247200000  | 1.980499953  | 5.914800000  |
| O  | 3.247200000  | 1.980499953  | 2.957400000  |
| O  | 3.247200000  | 1.980499953  | 0.000000000  |

|   |              |             |              |
|---|--------------|-------------|--------------|
| O | 1.266699988  | 3.247190143 | 1.478700000  |
| O | 1.266699988  | 3.247190143 | 4.436100000  |
| O | 5.227599998  | 3.247190143 | 1.478700000  |
| O | 5.227599998  | 3.247190143 | 4.436100000  |
| O | 1.266699988  | 3.247190143 | 7.393500000  |
| O | 1.266699988  | 3.247190143 | 10.350900000 |
| O | 5.227599998  | 3.247190143 | 7.393500000  |
| O | 5.227599998  | 3.247190143 | 10.350900000 |
| O | 7.761099988  | 3.247190143 | 1.478700000  |
| O | 7.761099988  | 3.247190143 | 4.436100000  |
| O | 11.721999998 | 3.247190143 | 1.478700000  |
| O | 11.721999998 | 3.247190143 | 4.436100000  |
| O | 7.761099988  | 3.247190143 | 7.393500000  |
| O | 7.761099988  | 3.247190143 | 10.350900000 |
| O | 11.721999998 | 3.247190143 | 7.393500000  |
| O | 11.721999998 | 3.247190143 | 10.350900000 |
| O | 9.741600000  | 4.513899978 | 8.872200000  |
| O | 9.741600000  | 4.513899978 | 5.914800000  |
| O | 9.741600000  | 4.513899978 | 2.957400000  |
| O | 9.741600000  | 4.513899978 | 0.000000000  |
| O | 3.247200000  | 4.513899978 | 8.872200000  |
| O | 3.247200000  | 4.513899978 | 5.914800000  |

|   |              |             |              |
|---|--------------|-------------|--------------|
| O | 3.247200000  | 4.513899978 | 2.957400000  |
| O | 3.247200000  | 4.513899978 | 0.000000000  |
| O | 0.000000000  | 5.227600085 | 2.957400000  |
| O | 0.000000000  | 5.227600085 | 0.000000000  |
| O | 0.000000000  | 5.227600085 | 8.872200000  |
| O | 0.000000000  | 5.227600085 | 5.914800000  |
| O | 6.494400000  | 5.227600085 | 0.000000000  |
| O | 6.494400000  | 5.227600085 | 2.957400000  |
| O | 6.494400000  | 5.227600085 | 8.872200000  |
| O | 6.494400000  | 5.227600085 | 5.914800000  |
| O | 8.474900012  | 6.494389931 | 7.393500000  |
| O | 11.008299988 | 6.494389931 | 7.393500000  |
| O | 8.474900012  | 6.494389931 | 10.350900000 |
| O | 11.008299988 | 6.494389931 | 10.350900000 |
| O | 8.474900012  | 6.494389931 | 1.478700000  |
| O | 11.008299988 | 6.494389931 | 1.478700000  |
| O | 8.474900012  | 6.494389931 | 4.436100000  |
| O | 11.008299988 | 6.494389931 | 4.436100000  |
| O | 1.980500012  | 6.494389931 | 1.478700000  |
| O | 4.513899988  | 6.494389931 | 1.478700000  |
| O | 1.980500012  | 6.494389931 | 4.436100000  |
| O | 4.513899988  | 6.494389931 | 4.436100000  |

|   |             |             |              |
|---|-------------|-------------|--------------|
| O | 1.980500012 | 6.494389931 | 7.393500000  |
| O | 4.513899988 | 6.494389931 | 7.393500000  |
| O | 1.980500012 | 6.494389931 | 10.350900000 |
| O | 4.513899988 | 6.494389931 | 10.350900000 |
| O | 0.000000000 | 7.761090122 | 8.872200000  |
| O | 0.000000000 | 7.761090122 | 5.914800000  |
| O | 6.494400000 | 7.761090122 | 2.957400000  |
| O | 6.494400000 | 7.761090122 | 0.000000000  |
| O | 0.000000000 | 7.761090122 | 2.957400000  |
| O | 0.000000000 | 7.761090122 | 0.000000000  |
| O | 6.494400000 | 7.761090122 | 8.872200000  |
| O | 6.494400000 | 7.761090122 | 5.914800000  |
| O | 3.247200000 | 8.474889884 | 2.957400000  |
| O | 3.247200000 | 8.474889884 | 0.000000000  |
| O | 3.247200000 | 8.474889884 | 8.872200000  |
| O | 3.247200000 | 8.474889884 | 5.914800000  |
| O | 9.741600000 | 8.474889884 | 2.957400000  |
| O | 9.741600000 | 8.474889884 | 0.000000000  |
| O | 9.741600000 | 8.474889884 | 8.872200000  |
| O | 9.741600000 | 8.474889884 | 5.914800000  |
| O | 1.263862845 | 9.792589269 | 1.479637614  |
| O | 1.263287571 | 9.790105372 | 4.438075425  |

|   |              |              |              |
|---|--------------|--------------|--------------|
| O | 5.208840014  | 9.778480632  | 1.480323376  |
| O | 5.208248634  | 9.777985209  | 4.438262569  |
| O | 1.262677747  | 9.791405185  | 7.393203314  |
| O | 1.263395638  | 9.795364991  | 10.354130664 |
| O | 5.208246037  | 9.776063529  | 7.394826808  |
| O | 5.208596734  | 9.778884256  | 10.354711142 |
| O | 7.758251155  | 9.786344878  | 1.481897896  |
| O | 7.757289594  | 9.785114717  | 4.438247072  |
| O | 11.702844376 | 9.786681351  | 1.481618717  |
| O | 11.702847103 | 9.783320910  | 4.435694481  |
| O | 7.757432730  | 9.783788471  | 7.395339266  |
| O | 7.758216085  | 9.785970543  | 10.352686151 |
| O | 11.702413018 | 9.784975055  | 7.395094630  |
| O | 11.702281831 | 9.787919370  | 10.352771088 |
| O | 9.725685083  | 11.076995713 | 2.958986823  |
| O | 9.725006548  | 11.076743537 | 0.001691751  |
| O | 3.233732043  | 11.073375595 | 2.958451533  |
| O | 3.235409936  | 11.073979603 | 0.001976490  |
| O | 3.233945709  | 11.073477037 | 8.872081113  |
| O | 3.234195484  | 11.073910665 | 5.914951655  |
| O | 9.726167098  | 11.073915309 | 8.872634265  |
| O | 9.727322581  | 11.074489670 | 5.915662614  |

|   |              |              |              |
|---|--------------|--------------|--------------|
| O | 6.461065414  | 11.797240607 | 8.878059437  |
| O | -0.031792036 | 11.819854289 | 2.961462403  |
| O | 6.463283381  | 11.811591062 | 0.008001187  |
| O | 6.462385725  | 11.799805229 | 5.914365144  |
| O | -0.033516300 | 11.823259736 | 0.006547329  |
| O | -0.033132740 | 11.816851752 | 5.915183516  |
| O | 6.462064382  | 11.808683537 | 2.954124857  |
| O | -0.032974926 | 11.821306266 | 8.872934855  |
| O | 8.436995706  | 13.107861206 | 1.481250343  |
| O | 8.434347549  | 13.100487023 | 4.440155660  |
| O | 10.973843429 | 13.119159117 | 1.483433733  |
| O | 10.974276866 | 13.122959616 | 4.436356229  |
| O | 1.944536363  | 13.106973589 | 1.482050143  |
| O | 1.943572074  | 13.108630592 | 4.437113442  |
| O | 4.480975718  | 13.115963698 | 1.481506336  |
| O | 4.482876499  | 13.109212454 | 4.439041785  |
| O | 1.943955244  | 13.106509957 | 7.391725323  |
| O | 1.944209175  | 13.101153182 | 10.353752708 |
| O | 4.483894042  | 13.107716544 | 7.395825936  |
| O | 4.480741140  | 13.110461904 | 10.348496462 |
| O | 8.432598478  | 13.096587583 | 7.394802439  |
| O | 8.436595781  | 13.102104379 | 10.350720190 |



|   |              |              |              |
|---|--------------|--------------|--------------|
| O | 10.973071115 | 13.121090799 | 7.393701813  |
| O | 10.972848747 | 13.117770721 | 10.352871758 |
| O | -0.036073275 | 14.439373832 | 2.959112335  |
| O | -0.041062533 | 14.437701113 | 5.913605447  |
| O | -0.034669185 | 14.433471629 | 8.877741694  |
| O | -0.039838468 | 14.439846394 | 0.009256071  |
| O | 6.456008874  | 14.425060882 | 2.971296586  |
| O | 6.449250542  | 14.410846517 | 5.920525763  |
| O | 6.456399707  | 14.409269167 | 8.868842760  |
| O | 6.451896620  | 14.418185337 | -0.007428279 |
| O | 9.688100951  | 15.113976307 | 8.880157535  |
| O | 3.195016717  | 15.114169904 | 8.879930998  |
| O | 9.688322540  | 15.108874923 | 5.919778605  |
| O | 9.690094732  | 15.121645171 | 2.958594553  |
| O | 3.205264101  | 15.114101323 | 2.961199431  |
| O | 9.705760913  | 15.122604582 | 0.008892784  |
| O | 3.197682148  | 15.114640680 | -0.001823651 |
| O | 3.207980448  | 15.111794949 | 5.918545251  |
| O | 1.236390623  | 16.474227706 | 10.355333024 |
| O | 5.162831866  | 16.488581018 | 4.438515486  |
| O | 5.161917974  | 16.452242320 | 7.398874542  |
| O | 7.730128714  | 16.432356496 | 1.453909772  |

|   |              |              |              |
|---|--------------|--------------|--------------|
| O | 7.723351288  | 16.451882987 | 4.448273605  |
| O | 5.161326464  | 16.458277398 | 10.355602739 |
| O | 11.652289368 | 16.487539810 | 1.488943842  |
| O | 11.650369753 | 16.465695872 | 4.435888250  |
| O | 1.237864592  | 16.456163192 | 4.446246130  |
| O | 1.239976052  | 16.467683633 | 1.476391808  |
| O | 5.165047106  | 16.456957582 | 1.472640524  |
| O | 7.720518431  | 16.455145201 | 7.396294388  |
| O | 7.727207923  | 16.450598890 | 10.359613092 |
| O | 1.234662334  | 16.457887704 | 7.398866971  |
| O | 11.650860730 | 16.462960870 | 7.405045690  |
| O | 11.654790492 | 16.473414742 | 10.350757098 |
| O | 3.201940007  | 17.751851831 | 8.867962282  |
| O | 3.208251135  | 17.744639456 | 0.004979197  |
| O | 9.635658022  | 17.762211762 | 2.978284094  |
| O | 9.675061365  | 17.719728329 | 5.928508495  |
| O | 3.188397235  | 17.741286158 | 2.963605098  |
| O | 3.180734102  | 17.740111718 | 5.925781299  |
| O | 9.674403093  | 17.745407413 | 8.879523824  |
| O | 9.669702706  | 17.753463114 | -0.000529375 |
| O | 6.453765059  | 18.554119634 | -0.009374130 |
| O | 6.431935822  | 18.558582362 | 5.933785917  |

|   |              |              |              |
|---|--------------|--------------|--------------|
| O | -0.048394970 | 18.511067554 | 0.004286692  |
| O | 6.519768945  | 18.462252933 | 2.874449189  |
| O | -0.041188914 | 18.503317608 | 5.932503115  |
| O | 6.457051875  | 18.466868896 | 8.920201559  |
| O | -0.033447719 | 18.524418592 | 8.873807879  |
| O | -0.018517742 | 18.501624886 | 2.972180139  |
| O | 1.946229453  | 19.987355255 | 4.454221764  |
| O | 4.421438826  | 19.946479890 | 1.506409182  |
| O | 4.374134136  | 19.989798433 | 4.468434674  |
| O | 1.979650544  | 20.013965533 | 7.413368168  |
| O | 1.981199199  | 19.950957978 | 10.357301706 |
| O | 4.480222238  | 19.949759963 | 7.376263681  |
| O | 4.457097108  | 19.967066521 | 10.346936493 |
| O | 8.466028791  | 20.013688711 | 1.477732930  |
| O | 8.479226191  | 20.098768807 | 4.593789869  |
| O | 10.917724020 | 19.891458025 | 1.528422293  |
| O | 10.969131223 | 19.903892871 | 4.435149965  |
| O | 8.428490640  | 19.976890310 | 7.385162025  |
| O | 8.446876156  | 20.012441048 | 10.348707265 |
| O | 10.944282999 | 19.969612212 | 7.435203480  |
| O | 10.916930275 | 19.940792000 | 10.355578962 |
| O | 1.948696805  | 19.958280724 | 1.476031479  |

|   |              |              |              |
|---|--------------|--------------|--------------|
| O | -0.064094013 | 21.100797116 | 0.043744205  |
| O | 6.414789826  | 21.056682754 | 3.057753336  |
| O | -0.076758353 | 21.133838238 | 2.974796255  |
| O | -0.049560845 | 21.152188147 | 5.914188055  |
| O | -0.033510455 | 21.124102318 | 8.887300011  |
| O | 6.435251343  | 21.156422274 | 8.797841027  |
| O | 6.433967530  | 21.174637165 | 0.017651538  |
| H | 0.000000000  | 0.932899949  | 9.814800036  |
| H | 0.816399984  | 0.932899949  | 8.400899982  |
| H | 6.457700016  | 0.932899949  | 6.856699960  |
| H | 0.834099951  | 0.932899949  | -0.439200043 |
| H | 0.000000000  | 0.932899949  | 3.900000036  |
| H | 0.816399984  | 0.932899949  | 2.486099982  |
| H | 6.457700016  | 0.932899949  | 0.941899960  |
| H | 0.834099951  | 0.932899949  | 5.475599957  |
| H | 6.494400000  | 0.932899949  | 9.814800036  |
| H | 7.310799984  | 0.932899949  | 8.400899982  |
| H | -0.036699984 | 0.932899949  | 6.856699960  |
| H | 7.328499951  | 0.932899949  | -0.439200043 |
| H | 6.494400000  | 0.932899949  | 3.900000036  |
| H | 7.310799984  | 0.932899949  | 2.486099982  |
| H | -0.036699984 | 0.932899949  | 0.941899960  |

|   |             |              |             |
|---|-------------|--------------|-------------|
| H | 7.328499951 | 0.932899949  | 5.475599957 |
| H | 7.497372925 | 20.716721346 | 5.141287416 |
| H | 7.219473912 | 21.732575041 | 8.759997427 |
| H | 0.606012986 | 21.824424954 | 2.952545960 |
| H | 0.722589155 | 21.743950105 | 5.901579239 |

14-Ec:

|    |             |             |              |
|----|-------------|-------------|--------------|
| Ti | 3.247200000 | 3.247194072 | 1.478700000  |
| Ti | 3.247200000 | 3.247194072 | 4.436100000  |
| Ti | 0.000000000 | 3.247194072 | 2.957400000  |
| Ti | 0.000000000 | 3.247194072 | 0.000000000  |
| Ti | 3.247200000 | 3.247194072 | 7.393500000  |
| Ti | 3.247200000 | 3.247194072 | 10.350900000 |
| Ti | 0.000000000 | 3.247194072 | 8.872200000  |
| Ti | 0.000000000 | 3.247194072 | 5.914800000  |
| Ti | 9.741600000 | 3.247194072 | 1.478700000  |
| Ti | 9.741600000 | 3.247194072 | 4.436100000  |
| Ti | 6.494400000 | 3.247194072 | 2.957400000  |
| Ti | 6.494400000 | 3.247194072 | 0.000000000  |
| Ti | 9.741600000 | 3.247194072 | 7.393500000  |
| Ti | 9.741600000 | 3.247194072 | 10.350900000 |
| Ti | 6.494400000 | 3.247194072 | 8.872200000  |
| Ti | 6.494400000 | 3.247194072 | 5.914800000  |

|    |              |             |              |
|----|--------------|-------------|--------------|
| Ti | 0.000000000  | 6.494391717 | 4.436100000  |
| Ti | 0.000000000  | 6.494391717 | 1.478700000  |
| Ti | 3.247200000  | 6.494391717 | 2.957400000  |
| Ti | 3.247200000  | 6.494391717 | 0.000000000  |
| Ti | 0.000000000  | 6.494391717 | 10.350900000 |
| Ti | 0.000000000  | 6.494391717 | 7.393500000  |
| Ti | 3.247200000  | 6.494391717 | 8.872200000  |
| Ti | 3.247200000  | 6.494391717 | 5.914800000  |
| Ti | 6.494400000  | 6.494391717 | 4.436100000  |
| Ti | 6.494400000  | 6.494391717 | 1.478700000  |
| Ti | 9.741600000  | 6.494391717 | 2.957400000  |
| Ti | 9.741600000  | 6.494391717 | 0.000000000  |
| Ti | 6.494400000  | 6.494391717 | 10.350900000 |
| Ti | 6.494400000  | 6.494391717 | 7.393500000  |
| Ti | 9.741600000  | 6.494391717 | 8.872200000  |
| Ti | 9.741600000  | 6.494391717 | 5.914800000  |
| Ti | 3.233021426  | 9.738964731 | 1.479278822  |
| Ti | 3.233842058  | 9.739659465 | 4.436663326  |
| Ti | -0.011539510 | 9.771216821 | 2.962299111  |
| Ti | -0.014696697 | 9.791127291 | 0.001607998  |
| Ti | 3.234251465  | 9.739991651 | 7.393902561  |
| Ti | 3.235986899  | 9.739408003 | 10.350904140 |

|    |              |              |              |
|----|--------------|--------------|--------------|
| Ti | -0.012259998 | 9.801232904  | 8.878840191  |
| Ti | -0.015586300 | 9.770707111  | 5.922703356  |
| Ti | 9.730770068  | 9.738519315  | 1.480417658  |
| Ti | 9.728410653  | 9.742339816  | 4.436814271  |
| Ti | 6.484754777  | 9.787532534  | 2.960189538  |
| Ti | 6.478674200  | 9.799982025  | 0.008157456  |
| Ti | 9.726985392  | 9.739417290  | 7.393178708  |
| Ti | 9.727393630  | 9.738396084  | 10.350979613 |
| Ti | 6.483472393  | 9.769762344  | 8.880154460  |
| Ti | 6.476584302  | 9.763408653  | 5.918346159  |
| Ti | -0.034001951 | 13.101777907 | 1.465113704  |
| Ti | -0.037860793 | 13.057603895 | 4.458802304  |
| Ti | 3.211196475  | 12.995611472 | 2.957566916  |
| Ti | 3.211143871  | 12.996097607 | 5.915111592  |
| Ti | 6.456919649  | 13.175965502 | 1.487393218  |
| Ti | 6.459966042  | 13.090972203 | 4.417506353  |
| Ti | 9.705854822  | 12.998687233 | 2.957615299  |
| Ti | 9.705970812  | 12.998177523 | 5.915280400  |
| Ti | -0.035880911 | 13.120005300 | 7.444457303  |
| Ti | -0.037487885 | 13.183927976 | 10.369796130 |
| Ti | 3.211248171  | 12.995454309 | 8.872538327  |
| Ti | 3.210927477  | 12.995762563 | 0.000872551  |

|    |              |              |              |
|----|--------------|--------------|--------------|
| Ti | 6.458116826  | 13.041413555 | 7.414374749  |
| Ti | 6.459680288  | 13.127074442 | 10.399051795 |
| Ti | 9.705444636  | 12.995673623 | 8.872214432  |
| Ti | 9.706143434  | 12.992962553 | 0.000973103  |
| Ti | 9.689382037  | 16.313643771 | 1.487729652  |
| Ti | 9.691817307  | 16.311886040 | 4.443147248  |
| Ti | 6.440412572  | 16.513945419 | 2.964324930  |
| Ti | -0.055872622 | 16.379315248 | 5.930350246  |
| Ti | 3.197880098  | 16.309072099 | 1.484208098  |
| Ti | 3.183803745  | 16.303194899 | 4.444486003  |
| Ti | -0.053636990 | 16.362375167 | 2.960497581  |
| Ti | 6.440417248  | 16.337509046 | 5.913570195  |
| Ti | 3.198748269  | 16.307183280 | 7.400505844  |
| Ti | 3.194175952  | 16.310965205 | 10.355115833 |
| Ti | -0.055165252 | 16.556718176 | 8.877695677  |
| Ti | 6.447464322  | 16.574393710 | 0.008184900  |
| Ti | 9.673502449  | 16.309067099 | 7.398177897  |
| Ti | 9.690676760  | 16.302254062 | 10.358910414 |
| Ti | 6.436970930  | 16.371998930 | 8.888935690  |
| Ti | -0.047065956 | 16.543068527 | 0.005713697  |
| Ti | 6.418955724  | 19.575564419 | 7.404033667  |
| Ti | 6.410553140  | 19.901797239 | 10.445410460 |



|    |              |              |              |
|----|--------------|--------------|--------------|
| Ti | 3.187226424  | 19.559353006 | 8.877364685  |
| Ti | 3.172628701  | 19.559122261 | 0.012876520  |
| Ti | 6.426861098  | 20.022369851 | 1.501113070  |
| Ti | 6.430364047  | 19.826990277 | 4.360823287  |
| Ti | 3.190530125  | 19.553970513 | 2.971929824  |
| Ti | 3.181492908  | 19.544777521 | 5.922903158  |
| Ti | -0.080580177 | 19.864250882 | 1.400179256  |
| Ti | -0.087144977 | 19.643258662 | 4.445920579  |
| Ti | 9.674181763  | 19.559795564 | 2.967629883  |
| Ti | 9.661061127  | 19.554547375 | 5.923930558  |
| Ti | -0.084379531 | 19.892712118 | 7.491853069  |
| Ti | -0.067372776 | 20.009634608 | 10.363913270 |
| Ti | 9.673398149  | 19.546796715 | 8.881003233  |
| Ti | 9.663452885  | 19.556928402 | 0.003244386  |
| O  | 0.000000000  | 1.266694833  | 2.957400000  |
| O  | 0.000000000  | 1.266694833  | 0.000000000  |
| O  | 0.000000000  | 1.266694833  | 8.872200000  |
| O  | 0.000000000  | 1.266694833  | 5.914800000  |
| O  | 6.494400000  | 1.266694833  | 2.957400000  |
| O  | 6.494400000  | 1.266694833  | 0.000000000  |
| O  | 6.494400000  | 1.266694833  | 8.872200000  |
| O  | 6.494400000  | 1.266694833  | 5.914800000  |

|   |              |             |              |
|---|--------------|-------------|--------------|
| O | 9.741600000  | 1.980495667 | 8.872200000  |
| O | 9.741600000  | 1.980495667 | 5.914800000  |
| O | 9.741600000  | 1.980495667 | 2.957400000  |
| O | 9.741600000  | 1.980495667 | 0.000000000  |
| O | 3.247200000  | 1.980495667 | 8.872200000  |
| O | 3.247200000  | 1.980495667 | 5.914800000  |
| O | 3.247200000  | 1.980495667 | 2.957400000  |
| O | 3.247200000  | 1.980495667 | 0.000000000  |
| O | 1.266698949  | 3.247194072 | 1.478700000  |
| O | 1.266698949  | 3.247194072 | 4.436100000  |
| O | 5.227599738  | 3.247194072 | 1.478700000  |
| O | 5.227599738  | 3.247194072 | 4.436100000  |
| O | 1.266698949  | 3.247194072 | 7.393500000  |
| O | 1.266698949  | 3.247194072 | 10.350900000 |
| O | 5.227599738  | 3.247194072 | 7.393500000  |
| O | 5.227599738  | 3.247194072 | 10.350900000 |
| O | 7.761098949  | 3.247194072 | 1.478700000  |
| O | 7.761098949  | 3.247194072 | 4.436100000  |
| O | 11.721999738 | 3.247194072 | 1.478700000  |
| O | 11.721999738 | 3.247194072 | 4.436100000  |
| O | 7.761098949  | 3.247194072 | 7.393500000  |
| O | 7.761098949  | 3.247194072 | 10.350900000 |

|   |              |             |              |
|---|--------------|-------------|--------------|
| O | 11.721999738 | 3.247194072 | 7.393500000  |
| O | 11.721999738 | 3.247194072 | 10.350900000 |
| O | 9.741600000  | 4.513896049 | 8.872200000  |
| O | 9.741600000  | 4.513896049 | 5.914800000  |
| O | 9.741600000  | 4.513896049 | 2.957400000  |
| O | 9.741600000  | 4.513896049 | 0.000000000  |
| O | 3.247200000  | 4.513896049 | 8.872200000  |
| O | 3.247200000  | 4.513896049 | 5.914800000  |
| O | 3.247200000  | 4.513896049 | 2.957400000  |
| O | 3.247200000  | 4.513896049 | 0.000000000  |
| O | 0.000000000  | 5.227596870 | 2.957400000  |
| O | 0.000000000  | 5.227596870 | 0.000000000  |
| O | 0.000000000  | 5.227596870 | 8.872200000  |
| O | 0.000000000  | 5.227596870 | 5.914800000  |
| O | 6.494400000  | 5.227596870 | 0.000000000  |
| O | 6.494400000  | 5.227596870 | 2.957400000  |
| O | 6.494400000  | 5.227596870 | 8.872200000  |
| O | 6.494400000  | 5.227596870 | 5.914800000  |
| O | 8.474899752  | 6.494391717 | 7.393500000  |
| O | 11.008298949 | 6.494391717 | 7.393500000  |
| O | 8.474899752  | 6.494391717 | 10.350900000 |
| O | 11.008298949 | 6.494391717 | 10.350900000 |

|   |              |             |              |
|---|--------------|-------------|--------------|
| O | 8.474899752  | 6.494391717 | 1.478700000  |
| O | 11.008298949 | 6.494391717 | 1.478700000  |
| O | 8.474899752  | 6.494391717 | 4.436100000  |
| O | 11.008298949 | 6.494391717 | 4.436100000  |
| O | 1.980499752  | 6.494391717 | 1.478700000  |
| O | 4.513898949  | 6.494391717 | 1.478700000  |
| O | 1.980499752  | 6.494391717 | 4.436100000  |
| O | 4.513898949  | 6.494391717 | 4.436100000  |
| O | 1.980499752  | 6.494391717 | 7.393500000  |
| O | 4.513898949  | 6.494391717 | 7.393500000  |
| O | 1.980499752  | 6.494391717 | 10.350900000 |
| O | 4.513898949  | 6.494391717 | 10.350900000 |
| O | 0.000000000  | 7.761086550 | 8.872200000  |
| O | 0.000000000  | 7.761086550 | 5.914800000  |
| O | 6.494400000  | 7.761086550 | 2.957400000  |
| O | 6.494400000  | 7.761086550 | 0.000000000  |
| O | 0.000000000  | 7.761086550 | 2.957400000  |
| O | 0.000000000  | 7.761086550 | 0.000000000  |
| O | 6.494400000  | 7.761086550 | 8.872200000  |
| O | 6.494400000  | 7.761086550 | 5.914800000  |
| O | 3.247200000  | 8.474887384 | 2.957400000  |
| O | 3.247200000  | 8.474887384 | 0.000000000  |

|   |              |             |              |
|---|--------------|-------------|--------------|
| O | 3.247200000  | 8.474887384 | 8.872200000  |
| O | 3.247200000  | 8.474887384 | 5.914800000  |
| O | 9.741600000  | 8.474887384 | 2.957400000  |
| O | 9.741600000  | 8.474887384 | 0.000000000  |
| O | 9.741600000  | 8.474887384 | 8.872200000  |
| O | 9.741600000  | 8.474887384 | 5.914800000  |
| O | 1.265254205  | 9.787387515 | 1.480726647  |
| O | 1.264709455  | 9.784962554 | 4.439094427  |
| O | 5.209885613  | 9.779664715 | 1.482732119  |
| O | 5.209952765  | 9.776119965 | 4.437953698  |
| O | 1.264491632  | 9.787182488 | 7.394361668  |
| O | 1.265171466  | 9.790440058 | 10.353395809 |
| O | 5.209572583  | 9.774850512 | 7.397020252  |
| O | 5.209675064  | 9.777634092 | 10.352578857 |
| O | 7.760248183  | 9.788594459 | 1.480923847  |
| O | 7.759449112  | 9.784207812 | 4.440041504  |
| O | 11.704856730 | 9.779886888 | 1.481663670  |
| O | 11.704545649 | 9.776839702 | 4.437592067  |
| O | 7.759437032  | 9.783344841 | 7.395014189  |
| O | 7.759899174  | 9.785257950 | 10.354151011 |
| O | 11.704235216 | 9.779054993 | 7.395548650  |
| O | 11.704457065 | 9.781329577 | 10.352913280 |

|   |              |              |             |
|---|--------------|--------------|-------------|
| O | 9.730118031  | 11.071399264 | 2.959438240 |
| O | 9.730558351  | 11.070474500 | 0.000722789 |
| O | 3.236167573  | 11.070356627 | 2.959456694 |
| O | 3.236997947  | 11.071084223 | 0.001505198 |
| O | 3.236365912  | 11.070602731 | 8.872601497 |
| O | 3.236479304  | 11.070198392 | 5.915635288 |
| O | 9.729992169  | 11.070620948 | 8.872949523 |
| O | 9.730533153  | 11.071121728 | 5.915828584 |
| O | 6.463560043  | 11.801532956 | 8.879367081 |
| O | -0.031595386 | 11.810261602 | 2.962836174 |
| O | 6.462809160  | 11.811470332 | 0.003587208 |
| O | 6.462380270  | 11.801190411 | 5.917970333 |
| O | -0.031927510 | 11.816162019 | 0.003826757 |
| O | -0.032462648 | 11.809758678 | 5.919484285 |
| O | 6.463183108  | 11.809669381 | 2.962105697 |
| O | -0.031697218 | 11.815436209 | 8.874762410 |
| O | 8.439821030  | 13.096050370 | 1.481793204 |
| O | 8.438845961  | 13.096372198 | 4.441069970 |
| O | 10.976144395 | 13.110683362 | 1.483662990 |
| O | 10.976514706 | 13.113545523 | 4.438302908 |
| O | 1.944619491  | 13.093897587 | 1.484307467 |
| O | 1.942943026  | 13.095523515 | 4.438026095 |

|   |              |              |              |
|---|--------------|--------------|--------------|
| O | 4.480124432  | 13.114048803 | 1.481349594  |
| O | 4.481765437  | 13.113411934 | 4.441219141  |
| O | 1.943838474  | 13.096201104 | 7.394351495  |
| O | 1.944649105  | 13.095967859 | 10.353607441 |
| O | 4.482392147  | 13.109329970 | 7.395477318  |
| O | 4.480627359  | 13.113178332 | 10.352373022 |
| O | 8.437433299  | 13.093379305 | 7.395958427  |
| O | 8.439773231  | 13.096566509 | 10.352114190 |
| O | 10.975621856 | 13.114682101 | 7.394103191  |
| O | 10.974817070 | 13.114935348 | 10.353557638 |
| O | -0.036420725 | 14.427395474 | 2.963033965  |
| O | -0.034899087 | 14.429296081 | 5.915035054  |
| O | -0.034747898 | 14.429107485 | 8.874674634  |
| O | -0.032899591 | 14.429013901 | 0.012381214  |
| O | 6.458558835  | 14.421186802 | 2.967655553  |
| O | 6.461714984  | 14.411253713 | 5.924132845  |
| O | 6.456370612  | 14.415805739 | 8.873627714  |
| O | 6.461801879  | 14.421750091 | 0.003871355  |
| O | 9.689627135  | 15.104964767 | 8.878592598  |
| O | 3.189935368  | 15.105383393 | 8.880870387  |
| O | 9.688311889  | 15.104534353 | 5.921735340  |
| O | 9.689088879  | 15.107316147 | 2.959955785  |

|   |              |              |              |
|---|--------------|--------------|--------------|
| O | 3.191251913  | 15.105438043 | 2.959456103  |
| O | 9.690549730  | 15.107767992 | 0.010021682  |
| O | 3.186641279  | 15.109140672 | 0.007574966  |
| O | 3.186147055  | 15.100754571 | 5.923337896  |
| O | 1.229742436  | 16.466552413 | 10.354475260 |
| O | 5.154986242  | 16.433106594 | 4.443835375  |
| O | 5.154310304  | 16.435507266 | 7.398253488  |
| O | 7.723799921  | 16.461862869 | 1.482910155  |
| O | 7.724719139  | 16.441238733 | 4.439187644  |
| O | 5.154522022  | 16.440933693 | 10.367934269 |
| O | 11.649923718 | 16.460807016 | 1.482191625  |
| O | 11.648275959 | 16.448084274 | 4.443498587  |
| O | 1.230012343  | 16.456118543 | 4.440623402  |
| O | 1.232867931  | 16.468484095 | 1.486311638  |
| O | 5.159074726  | 16.453075644 | 1.479313246  |
| O | 7.723195553  | 16.444058746 | 7.404875698  |
| O | 7.726388979  | 16.450409937 | 10.360876375 |
| O | 1.230011954  | 16.460036557 | 7.402564431  |
| O | 11.648486248 | 16.454364741 | 7.401234784  |
| O | 11.652764498 | 16.458921054 | 10.357539008 |
| O | 3.188604536  | 17.734391325 | 8.875465679  |
| O | 3.191204114  | 17.737019170 | 0.007588688  |



|   |              |              |              |
|---|--------------|--------------|--------------|
| O | 9.672376190  | 17.736026896 | 2.970211220  |
| O | 9.672276177  | 17.730366511 | 5.922272522  |
| O | 3.201053781  | 17.732508220 | 2.973427807  |
| O | 3.185889357  | 17.721869681 | 5.917863985  |
| O | 9.682192996  | 17.727016428 | 8.879063652  |
| O | 9.675926289  | 17.735044625 | 0.000832804  |
| O | 6.437501652  | 18.525559813 | 0.000317270  |
| O | 6.450796988  | 18.465769466 | 5.906391284  |
| O | -0.055216688 | 18.509999557 | 0.005896228  |
| O | 6.428752397  | 18.489367563 | 2.968763277  |
| O | -0.059594303 | 18.500293640 | 5.925492539  |
| O | 6.418963258  | 18.457928436 | 8.905327848  |
| O | -0.058553121 | 18.519750480 | 8.870352216  |
| O | -0.067039223 | 18.499516752 | 2.972435303  |
| O | 1.943393608  | 19.957538127 | 4.445506661  |
| O | 4.412902457  | 19.952029190 | 1.488508631  |
| O | 4.427162600  | 19.966079605 | 4.472047079  |
| O | 1.959223968  | 19.977644338 | 7.391767082  |
| O | 1.954408110  | 19.942221474 | 10.355248088 |
| O | 4.445551884  | 19.897948520 | 7.388336853  |
| O | 4.421677560  | 19.941289923 | 10.350010651 |
| O | 8.444379969  | 19.948513728 | 1.491090323  |

|   |              |              |              |
|---|--------------|--------------|--------------|
| O | 8.436269762  | 19.974222460 | 4.463172631  |
| O | 10.910586934 | 19.912208963 | 1.493338302  |
| O | 10.919100313 | 19.903235285 | 4.452581472  |
| O | 8.418011925  | 19.938753519 | 7.401213846  |
| O | 8.433292469  | 19.962541641 | 10.338776198 |
| O | 10.905880053 | 19.943443420 | 7.391308685  |
| O | 10.904193198 | 19.940710918 | 10.357352574 |
| O | 1.946249196  | 19.941490306 | 1.506465964  |
| O | -0.058900441 | 21.103846445 | 0.034302055  |
| O | 6.428058405  | 21.094863123 | 3.012371796  |
| O | -0.093219838 | 21.127257732 | 2.980370599  |
| O | -0.070604519 | 21.144713952 | 5.904487546  |
| O | -0.061837469 | 21.115416535 | 8.867029637  |
| O | 6.405349956  | 21.114584283 | 8.801146454  |
| O | 6.434165089  | 21.118611240 | -0.007439517 |
| H | 0.000000000  | 0.932897449  | 9.814799089  |
| H | 0.816399334  | 0.932897449  | 8.400899272  |
| H | 6.457698847  | 0.932897449  | 6.856699960  |
| H | 0.834099172  | 0.932897449  | -0.439201108 |
| H | 0.000000000  | 0.932897449  | 3.899999089  |
| H | 0.816399334  | 0.932897449  | 2.486099272  |
| H | 6.457698847  | 0.932897449  | 0.941899960  |

|   |              |              |              |
|---|--------------|--------------|--------------|
| H | 0.834099172  | 0.932897449  | 5.475598892  |
| H | 6.494400000  | 0.932897449  | 9.814799089  |
| H | 7.310799334  | 0.932897449  | 8.400899272  |
| H | -0.036701153 | 0.932897449  | 6.856699960  |
| H | 7.328499172  | 0.932897449  | -0.439201108 |
| H | 6.494400000  | 0.932897449  | 3.899999089  |
| H | 7.310799334  | 0.932897449  | 2.486099272  |
| H | -0.036701153 | 0.932897449  | 0.941899960  |
| H | 7.328499172  | 0.932897449  | 5.475598892  |
| H | 6.431733067  | 20.847521014 | 5.951891711  |
| H | 7.135429362  | 21.755321241 | 8.751443680  |
| H | 0.583742650  | 21.824118128 | 2.972309200  |
| H | 0.694881317  | 21.745593892 | 5.900431886  |

TS14-E3:

|    |             |             |              |
|----|-------------|-------------|--------------|
| Ti | 3.247200000 | 3.247190143 | 1.478700000  |
| Ti | 3.247200000 | 3.247190143 | 4.436100000  |
| Ti | 0.000000000 | 3.247190143 | 2.957400000  |
| Ti | 0.000000000 | 3.247190143 | 0.000000000  |
| Ti | 3.247200000 | 3.247190143 | 7.393500000  |
| Ti | 3.247200000 | 3.247190143 | 10.350900000 |
| Ti | 0.000000000 | 3.247190143 | 8.872200000  |
| Ti | 0.000000000 | 3.247190143 | 5.914800000  |

|    |             |             |              |
|----|-------------|-------------|--------------|
| Ti | 9.741600000 | 3.247190143 | 1.478700000  |
| Ti | 9.741600000 | 3.247190143 | 4.436100000  |
| Ti | 6.494400000 | 3.247190143 | 2.957400000  |
| Ti | 6.494400000 | 3.247190143 | 0.000000000  |
| Ti | 9.741600000 | 3.247190143 | 7.393500000  |
| Ti | 9.741600000 | 3.247190143 | 10.350900000 |
| Ti | 6.494400000 | 3.247190143 | 8.872200000  |
| Ti | 6.494400000 | 3.247190143 | 5.914800000  |
| Ti | 0.000000000 | 6.494389931 | 4.436100000  |
| Ti | 0.000000000 | 6.494389931 | 1.478700000  |
| Ti | 3.247200000 | 6.494389931 | 2.957400000  |
| Ti | 3.247200000 | 6.494389931 | 0.000000000  |
| Ti | 0.000000000 | 6.494389931 | 10.350900000 |
| Ti | 0.000000000 | 6.494389931 | 7.393500000  |
| Ti | 3.247200000 | 6.494389931 | 8.872200000  |
| Ti | 3.247200000 | 6.494389931 | 5.914800000  |
| Ti | 6.494400000 | 6.494389931 | 4.436100000  |
| Ti | 6.494400000 | 6.494389931 | 1.478700000  |
| Ti | 9.741600000 | 6.494389931 | 2.957400000  |
| Ti | 9.741600000 | 6.494389931 | 0.000000000  |
| Ti | 6.494400000 | 6.494389931 | 10.350900000 |
| Ti | 6.494400000 | 6.494389931 | 7.393500000  |

|    |              |              |              |
|----|--------------|--------------|--------------|
| Ti | 9.741600000  | 6.494389931  | 8.872200000  |
| Ti | 9.741600000  | 6.494389931  | 5.914800000  |
| Ti | 3.233860762  | 9.740881768  | 1.479910996  |
| Ti | 3.233285228  | 9.742240518  | 4.437249009  |
| Ti | -0.009983971 | 9.772078363  | 2.960079759  |
| Ti | -0.013370801 | 9.796751958  | 0.000359856  |
| Ti | 3.233651123  | 9.741764027  | 7.393471136  |
| Ti | 3.234441881  | 9.739388715  | 10.351422395 |
| Ti | -0.010032809 | 9.795127102  | 8.874438988  |
| Ti | -0.016859722 | 9.780329803  | 5.919064926  |
| Ti | 9.733272621  | 9.740632092  | 1.481441746  |
| Ti | 9.728614967  | 9.746669670  | 4.436935643  |
| Ti | 6.479599782  | 9.763951582  | 2.961959956  |
| Ti | 6.486593082  | 9.773269590  | 0.007606906  |
| Ti | 9.728245046  | 9.740464570  | 7.392336322  |
| Ti | 9.733181699  | 9.740039514  | 10.351493136 |
| Ti | 6.480611739  | 9.771079303  | 8.884510828  |
| Ti | 6.480348067  | 9.740929274  | 5.923724487  |
| Ti | -0.034299005 | 13.108885983 | 1.469320310  |
| Ti | -0.034413306 | 13.067945609 | 4.456620216  |
| Ti | 3.211706026  | 12.998818679 | 2.957450631  |
| Ti | 3.212617710  | 13.000786794 | 5.916247352  |

|    |              |              |              |
|----|--------------|--------------|--------------|
| Ti | 6.459383624  | 13.133682095 | 1.431499186  |
| Ti | 6.457896017  | 13.018120855 | 4.414551910  |
| Ti | 9.705886125  | 13.002841707 | 2.958281069  |
| Ti | 9.706852362  | 13.004266537 | 5.915444122  |
| Ti | -0.034319397 | 13.126154321 | 7.442300885  |
| Ti | -0.037560362 | 13.176950988 | 10.366916569 |
| Ti | 3.213638370  | 12.996826989 | 8.874708112  |
| Ti | 3.211168939  | 12.996504089 | -0.000266403 |
| Ti | 6.460097099  | 13.029735594 | 7.427724926  |
| Ti | 6.462159590  | 13.152965340 | 10.397299832 |
| Ti | 9.705520101  | 12.995922227 | 8.872431978  |
| Ti | 9.707834835  | 12.996720903 | 0.002159967  |
| Ti | 9.688683759  | 16.318630497 | 1.483649150  |
| Ti | 9.691680794  | 16.317539282 | 4.437310405  |
| Ti | 6.444277650  | 16.336806811 | 2.943521632  |
| Ti | -0.052920268 | 16.389711970 | 5.926773803  |
| Ti | 3.201783102  | 16.314004890 | 1.478921214  |
| Ti | 3.197273651  | 16.312320740 | 4.436001696  |
| Ti | -0.045432874 | 16.378043295 | 2.959197271  |
| Ti | 6.444418708  | 16.286299468 | 5.913441725  |
| Ti | 3.205119795  | 16.310429420 | 7.397005110  |
| Ti | 3.199878944  | 16.316567726 | 10.355898124 |

|    |              |              |              |
|----|--------------|--------------|--------------|
| Ti | -0.048810871 | 16.554795066 | 8.877515631  |
| Ti | 6.443305957  | 16.755199585 | 0.009155992  |
| Ti | 9.678944756  | 16.314970731 | 7.397872575  |
| Ti | 9.689750269  | 16.309099246 | 10.359558203 |
| Ti | 6.443461303  | 16.376056249 | 8.901304601  |
| Ti | -0.049702163 | 16.529458884 | 0.004690555  |
| Ti | 6.425698860  | 19.542084668 | 7.435046147  |
| Ti | 6.421504516  | 20.102842913 | 10.305924807 |
| Ti | 3.180490692  | 19.560048454 | 8.874941037  |
| Ti | 3.184797518  | 19.565570965 | 0.001473495  |
| Ti | 6.426473382  | 20.099166717 | 1.422270442  |
| Ti | 6.427703291  | 19.669684273 | 4.219196950  |
| Ti | 3.194090355  | 19.562394119 | 2.962380025  |
| Ti | 3.189739237  | 19.544204589 | 5.917427236  |
| Ti | -0.068316282 | 19.855671899 | 1.390328393  |
| Ti | -0.087487621 | 19.655492053 | 4.439886063  |
| Ti | 9.669921307  | 19.567252971 | 2.959169472  |
| Ti | 9.664029068  | 19.551588772 | 5.919399230  |
| Ti | -0.086181727 | 19.896736932 | 7.489866879  |
| Ti | -0.067355630 | 20.000263378 | 10.360548103 |
| Ti | 9.668012213  | 19.557005912 | 8.880746768  |
| Ti | 9.669887017  | 19.559927367 | 0.000601535  |

|   |             |             |              |
|---|-------------|-------------|--------------|
| O | 0.000000000 | 1.266689833 | 2.957400000  |
| O | 0.000000000 | 1.266689833 | 0.000000000  |
| O | 0.000000000 | 1.266689833 | 8.872200000  |
| O | 0.000000000 | 1.266689833 | 5.914800000  |
| O | 6.494400000 | 1.266689833 | 2.957400000  |
| O | 6.494400000 | 1.266689833 | 0.000000000  |
| O | 6.494400000 | 1.266689833 | 8.872200000  |
| O | 6.494400000 | 1.266689833 | 5.914800000  |
| O | 9.741600000 | 1.980499953 | 8.872200000  |
| O | 9.741600000 | 1.980499953 | 5.914800000  |
| O | 9.741600000 | 1.980499953 | 2.957400000  |
| O | 9.741600000 | 1.980499953 | 0.000000000  |
| O | 3.247200000 | 1.980499953 | 8.872200000  |
| O | 3.247200000 | 1.980499953 | 5.914800000  |
| O | 3.247200000 | 1.980499953 | 2.957400000  |
| O | 3.247200000 | 1.980499953 | 0.000000000  |
| O | 1.266699988 | 3.247190143 | 1.478700000  |
| O | 1.266699988 | 3.247190143 | 4.436100000  |
| O | 5.227599998 | 3.247190143 | 1.478700000  |
| O | 5.227599998 | 3.247190143 | 4.436100000  |
| O | 1.266699988 | 3.247190143 | 7.393500000  |
| O | 1.266699988 | 3.247190143 | 10.350900000 |



|   |              |             |              |
|---|--------------|-------------|--------------|
| O | 5.227599998  | 3.247190143 | 7.393500000  |
| O | 5.227599998  | 3.247190143 | 10.350900000 |
| O | 7.761099988  | 3.247190143 | 1.478700000  |
| O | 7.761099988  | 3.247190143 | 4.436100000  |
| O | 11.721999998 | 3.247190143 | 1.478700000  |
| O | 11.721999998 | 3.247190143 | 4.436100000  |
| O | 7.761099988  | 3.247190143 | 7.393500000  |
| O | 7.761099988  | 3.247190143 | 10.350900000 |
| O | 11.721999998 | 3.247190143 | 7.393500000  |
| O | 11.721999998 | 3.247190143 | 10.350900000 |
| O | 9.741600000  | 4.513899978 | 8.872200000  |
| O | 9.741600000  | 4.513899978 | 5.914800000  |
| O | 9.741600000  | 4.513899978 | 2.957400000  |
| O | 9.741600000  | 4.513899978 | 0.000000000  |
| O | 3.247200000  | 4.513899978 | 8.872200000  |
| O | 3.247200000  | 4.513899978 | 5.914800000  |
| O | 3.247200000  | 4.513899978 | 2.957400000  |
| O | 3.247200000  | 4.513899978 | 0.000000000  |
| O | 0.000000000  | 5.227600085 | 2.957400000  |
| O | 0.000000000  | 5.227600085 | 0.000000000  |
| O | 0.000000000  | 5.227600085 | 8.872200000  |
| O | 0.000000000  | 5.227600085 | 5.914800000  |

|   |              |             |              |
|---|--------------|-------------|--------------|
| O | 6.494400000  | 5.227600085 | 0.000000000  |
| O | 6.494400000  | 5.227600085 | 2.957400000  |
| O | 6.494400000  | 5.227600085 | 8.872200000  |
| O | 6.494400000  | 5.227600085 | 5.914800000  |
| O | 8.474900012  | 6.494389931 | 7.393500000  |
| O | 11.008299988 | 6.494389931 | 7.393500000  |
| O | 8.474900012  | 6.494389931 | 10.350900000 |
| O | 11.008299988 | 6.494389931 | 10.350900000 |
| O | 8.474900012  | 6.494389931 | 1.478700000  |
| O | 11.008299988 | 6.494389931 | 1.478700000  |
| O | 8.474900012  | 6.494389931 | 4.436100000  |
| O | 11.008299988 | 6.494389931 | 4.436100000  |
| O | 1.980500012  | 6.494389931 | 1.478700000  |
| O | 4.513899988  | 6.494389931 | 1.478700000  |
| O | 1.980500012  | 6.494389931 | 4.436100000  |
| O | 4.513899988  | 6.494389931 | 4.436100000  |
| O | 1.980500012  | 6.494389931 | 7.393500000  |
| O | 4.513899988  | 6.494389931 | 7.393500000  |
| O | 1.980500012  | 6.494389931 | 10.350900000 |
| O | 4.513899988  | 6.494389931 | 10.350900000 |
| O | 0.000000000  | 7.761090122 | 8.872200000  |
| O | 0.000000000  | 7.761090122 | 5.914800000  |

|   |             |             |              |
|---|-------------|-------------|--------------|
| O | 6.494400000 | 7.761090122 | 2.957400000  |
| O | 6.494400000 | 7.761090122 | 0.000000000  |
| O | 0.000000000 | 7.761090122 | 2.957400000  |
| O | 0.000000000 | 7.761090122 | 0.000000000  |
| O | 6.494400000 | 7.761090122 | 8.872200000  |
| O | 6.494400000 | 7.761090122 | 5.914800000  |
| O | 3.247200000 | 8.474889884 | 2.957400000  |
| O | 3.247200000 | 8.474889884 | 0.000000000  |
| O | 3.247200000 | 8.474889884 | 8.872200000  |
| O | 3.247200000 | 8.474889884 | 5.914800000  |
| O | 9.741600000 | 8.474889884 | 2.957400000  |
| O | 9.741600000 | 8.474889884 | 0.000000000  |
| O | 9.741600000 | 8.474889884 | 8.872200000  |
| O | 9.741600000 | 8.474889884 | 5.914800000  |
| O | 1.265917153 | 9.789831764 | 1.480703224  |
| O | 1.264933122 | 9.787421091 | 4.438386662  |
| O | 5.210974594 | 9.776278557 | 1.480915684  |
| O | 5.210103045 | 9.773533554 | 4.441331641  |
| O | 1.265114835 | 9.788555525 | 7.393820937  |
| O | 1.266109517 | 9.792235294 | 10.352976923 |
| O | 5.210006539 | 9.775380939 | 7.395879051  |
| O | 5.210827820 | 9.777090449 | 10.354697538 |

|   |              |              |              |
|---|--------------|--------------|--------------|
| O | 7.760205190  | 9.784866112  | 1.482752584  |
| O | 7.758598475  | 9.782106465  | 4.441365592  |
| O | 11.705581895 | 9.782425435  | 1.481316826  |
| O | 11.704910374 | 9.779606136  | 4.436965099  |
| O | 7.759088802  | 9.783849193  | 7.395509494  |
| O | 7.760760331  | 9.784641083  | 10.352953500 |
| O | 11.704715412 | 9.781184558  | 7.395580117  |
| O | 11.705428757 | 9.782775838  | 10.352030910 |
| O | 9.730971914  | 11.072977685 | 2.960276486  |
| O | 9.730189989  | 11.072310812 | 0.000969909  |
| O | 3.236649717  | 11.071892543 | 2.960060122  |
| O | 3.237930023  | 11.072150077 | 0.001474086  |
| O | 3.236727131  | 11.071794316 | 8.872047162  |
| O | 3.237193948  | 11.072639784 | 5.915252009  |
| O | 9.731059069  | 11.072163650 | 8.872173383  |
| O | 9.729627184  | 11.074028895 | 5.915834380  |
| O | 6.464883731  | 11.799458755 | 8.875010713  |
| O | -0.030283387 | 11.813827427 | 2.962498676  |
| O | 6.465042844  | 11.801889788 | 0.000123028  |
| O | 6.463267665  | 11.798831887 | 5.919777186  |
| O | -0.030858401 | 11.818218003 | 0.004013902  |
| O | -0.030756309 | 11.812353662 | 5.918260631  |

|   |              |              |              |
|---|--------------|--------------|--------------|
| O | 6.463475616  | 11.794377017 | 2.963305218  |
| O | -0.030596417 | 11.818164782 | 8.873516871  |
| O | 8.438965328  | 13.089508797 | 1.485417675  |
| O | 8.434229611  | 13.094168694 | 4.439797223  |
| O | 10.976168425 | 13.115170736 | 1.482846985  |
| O | 10.976708109 | 13.121183669 | 4.439677744  |
| O | 1.947048137  | 13.097439838 | 1.482417688  |
| O | 1.946356223  | 13.101991864 | 4.439295648  |
| O | 4.484201617  | 13.107554380 | 1.484578956  |
| O | 4.488428172  | 13.109838608 | 4.439107203  |
| O | 1.947728620  | 13.102530506 | 7.392685414  |
| O | 1.947805124  | 13.098177435 | 10.352974202 |
| O | 4.488263994  | 13.107929072 | 7.394739269  |
| O | 4.484769097  | 13.109469274 | 10.349572601 |
| O | 8.435269884  | 13.092592416 | 7.395207248  |
| O | 8.439833239  | 13.092947462 | 10.349184117 |
| O | 10.975618479 | 13.121438345 | 7.392744089  |
| O | 10.974760309 | 13.117383170 | 10.353319271 |
| O | -0.031542262 | 14.431212404 | 2.961214809  |
| O | -0.032528761 | 14.432344338 | 5.914440262  |
| O | -0.031564343 | 14.430872717 | 8.875178930  |
| O | -0.031518232 | 14.432366484 | 0.009612496  |

|   |              |              |              |
|---|--------------|--------------|--------------|
| O | 6.462284932  | 14.411909870 | 2.967244357  |
| O | 6.462359358  | 14.413158963 | 5.921700442  |
| O | 6.461925922  | 14.427259385 | 8.866197188  |
| O | 6.465470695  | 14.388075313 | 0.005435465  |
| O | 9.677013841  | 15.110582647 | 8.877596545  |
| O | 3.205295923  | 15.109694316 | 8.878137513  |
| O | 9.676231396  | 15.109615735 | 5.921371343  |
| O | 9.681155710  | 15.108166616 | 2.957749328  |
| O | 3.201386554  | 15.106906808 | 2.955944959  |
| O | 9.688249933  | 15.107671551 | 0.006707383  |
| O | 3.194187252  | 15.108788483 | 0.002077514  |
| O | 3.205031601  | 15.106381381 | 5.918780306  |
| O | 1.235049270  | 16.469078816 | 10.353758741 |
| O | 5.164086195  | 16.448405745 | 4.437391674  |
| O | 5.164812658  | 16.474240565 | 7.399360384  |
| O | 7.722096310  | 16.465753022 | 1.471137455  |
| O | 7.720905497  | 16.461489605 | 4.436636472  |
| O | 5.163819924  | 16.462059680 | 10.370705116 |
| O | 11.651815017 | 16.459216450 | 1.483378607  |
| O | 11.649802662 | 16.442788579 | 4.438309060  |
| O | 1.236617538  | 16.455332726 | 4.440188546  |
| O | 1.237719767  | 16.468867002 | 1.481638118  |

|   |              |              |              |
|---|--------------|--------------|--------------|
| O | 5.164496771  | 16.451720466 | 1.470029021  |
| O | 7.719183832  | 16.488032732 | 7.401111046  |
| O | 7.722766013  | 16.474467380 | 10.369593607 |
| O | 1.234871973  | 16.459505416 | 7.397716543  |
| O | 11.651051406 | 16.449858436 | 7.399530375  |
| O | 11.653801524 | 16.458354194 | 10.353924119 |
| O | 3.187734806  | 17.735902237 | 8.873561824  |
| O | 3.203511782  | 17.740331033 | 0.006989992  |
| O | 9.673088496  | 17.741143640 | 2.964260695  |
| O | 9.687179266  | 17.730211133 | 5.915770382  |
| O | 3.205074854  | 17.739001930 | 2.964738492  |
| O | 3.186659723  | 17.725002950 | 5.913071104  |
| O | 9.694123468  | 17.734523128 | 8.879019291  |
| O | 9.679921774  | 17.735603627 | 0.004231448  |
| O | 6.426299592  | 18.601251891 | 0.016878000  |
| O | 6.431991803  | 18.564989275 | 5.881754722  |
| O | -0.057251253 | 18.504063421 | 0.001462730  |
| O | 6.428402089  | 18.473341174 | 2.881379087  |
| O | -0.064287156 | 18.502949703 | 5.914421571  |
| O | 6.426864475  | 18.509237671 | 8.968410137  |
| O | -0.057263593 | 18.517006548 | 8.861899731  |
| O | -0.060408311 | 18.496680666 | 2.976044278  |

|   |              |              |              |
|---|--------------|--------------|--------------|
| O | 1.953071173  | 19.963536414 | 4.438393878  |
| O | 4.405117100  | 19.988640781 | 1.477644800  |
| O | 4.443630450  | 19.947757200 | 4.462831702  |
| O | 1.960996679  | 19.979703536 | 7.383004187  |
| O | 1.948005541  | 19.931185382 | 10.353516234 |
| O | 4.445310162  | 19.889529558 | 7.387726564  |
| O | 4.406391561  | 19.965633475 | 10.348029074 |
| O | 8.453693198  | 19.976328808 | 1.475351750  |
| O | 8.420631506  | 19.946549185 | 4.460002180  |
| O | 10.918108099 | 19.903166705 | 1.494679187  |
| O | 10.913740745 | 19.912865121 | 4.442609001  |
| O | 8.414704977  | 19.886390574 | 7.392541211  |
| O | 8.444750669  | 19.948889849 | 10.349852844 |
| O | 10.902648180 | 19.957069137 | 7.387518126  |
| O | 10.909625244 | 19.938712442 | 10.353566392 |
| O | 1.946216724  | 19.933955032 | 1.500285826  |
| O | -0.056044854 | 21.097668848 | 0.029577667  |
| O | 6.430151550  | 21.075373064 | 3.010442507  |
| O | -0.093411813 | 21.121996327 | 2.973653161  |
| O | -0.061309994 | 21.147137484 | 5.899164818  |
| O | -0.057506094 | 21.111688545 | 8.865024520  |
| O | 6.430354046  | 21.210233980 | 8.847890054  |



|   |              |              |              |
|---|--------------|--------------|--------------|
| O | 6.430131028  | 21.219827382 | -0.029607005 |
| H | 0.000000000  | 0.932899949  | 9.814800036  |
| H | 0.816399984  | 0.932899949  | 8.400899982  |
| H | 6.457700016  | 0.932899949  | 6.856699960  |
| H | 0.834099951  | 0.932899949  | -0.439200043 |
| H | 0.000000000  | 0.932899949  | 3.900000036  |
| H | 0.816399984  | 0.932899949  | 2.486099982  |
| H | 6.457700016  | 0.932899949  | 0.941899960  |
| H | 0.834099951  | 0.932899949  | 5.475599957  |
| H | 6.494400000  | 0.932899949  | 9.814800036  |
| H | 7.310799984  | 0.932899949  | 8.400899982  |
| H | -0.036699984 | 0.932899949  | 6.856699960  |
| H | 7.328499951  | 0.932899949  | -0.439200043 |
| H | 6.494400000  | 0.932899949  | 3.900000036  |
| H | 7.310799984  | 0.932899949  | 2.486099982  |
| H | -0.036699984 | 0.932899949  | 0.941899960  |
| H | 7.328499951  | 0.932899949  | 5.475599957  |
| H | 6.433520845  | 21.286248957 | 6.637960246  |
| H | 6.433750357  | 21.490049993 | 7.673563296  |
| H | 0.542597249  | 21.855754066 | 2.966255165  |
| H | 0.708103655  | 21.742445265 | 5.895792199  |

TS14-F1:

|    |             |             |              |
|----|-------------|-------------|--------------|
| Ti | 3.247200000 | 3.247190143 | 1.478700000  |
| Ti | 3.247200000 | 3.247190143 | 4.436100000  |
| Ti | 0.000000000 | 3.247190143 | 2.957400000  |
| Ti | 0.000000000 | 3.247190143 | 0.000000000  |
| Ti | 3.247200000 | 3.247190143 | 7.393500000  |
| Ti | 3.247200000 | 3.247190143 | 10.350900000 |
| Ti | 0.000000000 | 3.247190143 | 8.872200000  |
| Ti | 0.000000000 | 3.247190143 | 5.914800000  |
| Ti | 9.741600000 | 3.247190143 | 1.478700000  |
| Ti | 9.741600000 | 3.247190143 | 4.436100000  |
| Ti | 6.494400000 | 3.247190143 | 2.957400000  |
| Ti | 6.494400000 | 3.247190143 | 0.000000000  |
| Ti | 9.741600000 | 3.247190143 | 7.393500000  |
| Ti | 9.741600000 | 3.247190143 | 10.350900000 |
| Ti | 6.494400000 | 3.247190143 | 8.872200000  |
| Ti | 6.494400000 | 3.247190143 | 5.914800000  |
| Ti | 0.000000000 | 6.494389931 | 4.436100000  |
| Ti | 0.000000000 | 6.494389931 | 1.478700000  |
| Ti | 3.247200000 | 6.494389931 | 2.957400000  |
| Ti | 3.247200000 | 6.494389931 | 0.000000000  |
| Ti | 0.000000000 | 6.494389931 | 10.350900000 |
| Ti | 0.000000000 | 6.494389931 | 7.393500000  |

|    |              |             |              |
|----|--------------|-------------|--------------|
| Ti | 3.247200000  | 6.494389931 | 8.872200000  |
| Ti | 3.247200000  | 6.494389931 | 5.914800000  |
| Ti | 6.494400000  | 6.494389931 | 4.436100000  |
| Ti | 6.494400000  | 6.494389931 | 1.478700000  |
| Ti | 9.741600000  | 6.494389931 | 2.957400000  |
| Ti | 9.741600000  | 6.494389931 | 0.000000000  |
| Ti | 6.494400000  | 6.494389931 | 10.350900000 |
| Ti | 6.494400000  | 6.494389931 | 7.393500000  |
| Ti | 9.741600000  | 6.494389931 | 8.872200000  |
| Ti | 9.741600000  | 6.494389931 | 5.914800000  |
| Ti | 3.233769711  | 9.741581860 | 1.478793336  |
| Ti | 3.234244711  | 9.740195606 | 4.436777245  |
| Ti | -0.007960706 | 9.772652724 | 2.960427195  |
| Ti | -0.013735396 | 9.798820087 | 0.000273145  |
| Ti | 3.233476683  | 9.742310527 | 7.393849210  |
| Ti | 3.234057672  | 9.740889626 | 10.351183910 |
| Ti | -0.011217517 | 9.787528605 | 8.874711661  |
| Ti | -0.017929350 | 9.788943433 | 5.918656213  |
| Ti | 9.736041443  | 9.741140730 | 1.481273411  |
| Ti | 9.729302594  | 9.745438437 | 4.437009578  |
| Ti | 6.485599179  | 9.772758452 | 2.955423392  |
| Ti | 6.482198581  | 9.771229680 | 0.005790353  |

|    |              |              |              |
|----|--------------|--------------|--------------|
| Ti | 9.726799652  | 9.740641379  | 7.392954892  |
| Ti | 9.729739667  | 9.740310264  | 10.351883631 |
| Ti | 6.480795401  | 9.758354776  | 8.878803874  |
| Ti | 6.477557943  | 9.742097999  | 5.915746723  |
| Ti | -0.034414475 | 13.110568704 | 1.476809985  |
| Ti | -0.035941308 | 13.084805679 | 4.455100467  |
| Ti | 3.211429364  | 12.997598161 | 2.957973381  |
| Ti | 3.210983849  | 12.999581279 | 5.914843060  |
| Ti | 6.457846010  | 13.171902826 | 1.455654401  |
| Ti | 6.459456621  | 13.033104250 | 4.407157464  |
| Ti | 9.705584915  | 13.002433439 | 2.957440457  |
| Ti | 9.705963669  | 13.002901358 | 5.915025236  |
| Ti | -0.035499819 | 13.127066226 | 7.441915714  |
| Ti | -0.036710375 | 13.167568328 | 10.363916464 |
| Ti | 3.210889810  | 12.999137292 | 8.872500472  |
| Ti | 3.210594834  | 12.999596281 | -0.000081388 |
| Ti | 6.458313607  | 13.012734434 | 7.420537970  |
| Ti | 6.458724832  | 13.104266805 | 10.411557930 |
| Ti | 9.705606606  | 12.996376930 | 8.872470780  |
| Ti | 9.706709875  | 12.997843551 | 0.001373298  |
| Ti | 9.685742964  | 16.317757168 | 1.482559407  |
| Ti | 9.684937659  | 16.325722499 | 4.437040808  |

|    |              |              |              |
|----|--------------|--------------|--------------|
| Ti | 6.434638661  | 16.404681435 | 2.936228447  |
| Ti | -0.053571786 | 16.398349532 | 5.926131692  |
| Ti | 3.193347266  | 16.313852013 | 1.477975437  |
| Ti | 3.188861194  | 16.316113381 | 4.436416560  |
| Ti | -0.058083316 | 16.399352878 | 2.958087773  |
| Ti | 6.444590810  | 16.282215717 | 5.914554063  |
| Ti | 3.202357207  | 16.313221573 | 7.396689378  |
| Ti | 3.200044681  | 16.317935406 | 10.353025897 |
| Ti | -0.049667223 | 16.554677908 | 8.875947499  |
| Ti | 6.444304017  | 16.658913733 | -0.005847135 |
| Ti | 9.679931126  | 16.313348018 | 7.396073766  |
| Ti | 9.688893788  | 16.310660165 | 10.355823716 |
| Ti | 6.441932782  | 16.306061347 | 8.887151550  |
| Ti | -0.049284703 | 16.502005995 | -0.000102918 |
| Ti | 6.415766584  | 19.597737329 | 7.583942601  |
| Ti | 6.412761495  | 20.007980105 | 10.563519434 |
| Ti | 3.188804563  | 19.574028146 | 8.878466731  |
| Ti | 3.189519207  | 19.567592301 | 0.010479724  |
| Ti | 6.423752618  | 20.084307981 | 1.658771354  |
| Ti | 6.428930343  | 19.539213934 | 4.385942733  |
| Ti | 3.188516212  | 19.560410287 | 2.966732017  |
| Ti | 3.191979675  | 19.554435932 | 5.919603646  |

|    |              |              |              |
|----|--------------|--------------|--------------|
| Ti | -0.069565935 | 19.849158544 | 1.381653274  |
| Ti | -0.090475305 | 19.672602156 | 4.445321528  |
| Ti | 9.676919673  | 19.567353341 | 2.962651278  |
| Ti | 9.648053623  | 19.564361877 | 5.925224953  |
| Ti | -0.086374871 | 19.896284373 | 7.492090607  |
| Ti | -0.065508883 | 19.995462748 | 10.362943124 |
| Ti | 9.670212386  | 19.564838011 | 8.884980345  |
| Ti | 9.654271881  | 19.565217704 | 0.009787456  |
| O  | 0.000000000  | 1.266689833  | 2.957400000  |
| O  | 0.000000000  | 1.266689833  | 0.000000000  |
| O  | 0.000000000  | 1.266689833  | 8.872200000  |
| O  | 0.000000000  | 1.266689833  | 5.914800000  |
| O  | 6.494400000  | 1.266689833  | 2.957400000  |
| O  | 6.494400000  | 1.266689833  | 0.000000000  |
| O  | 6.494400000  | 1.266689833  | 8.872200000  |
| O  | 6.494400000  | 1.266689833  | 5.914800000  |
| O  | 9.741600000  | 1.980499953  | 8.872200000  |
| O  | 9.741600000  | 1.980499953  | 5.914800000  |
| O  | 9.741600000  | 1.980499953  | 2.957400000  |
| O  | 9.741600000  | 1.980499953  | 0.000000000  |
| O  | 3.247200000  | 1.980499953  | 8.872200000  |
| O  | 3.247200000  | 1.980499953  | 5.914800000  |

|   |              |             |              |
|---|--------------|-------------|--------------|
| O | 3.247200000  | 1.980499953 | 2.957400000  |
| O | 3.247200000  | 1.980499953 | 0.000000000  |
| O | 1.266699988  | 3.247190143 | 1.478700000  |
| O | 1.266699988  | 3.247190143 | 4.436100000  |
| O | 5.227599998  | 3.247190143 | 1.478700000  |
| O | 5.227599998  | 3.247190143 | 4.436100000  |
| O | 1.266699988  | 3.247190143 | 7.393500000  |
| O | 1.266699988  | 3.247190143 | 10.350900000 |
| O | 5.227599998  | 3.247190143 | 7.393500000  |
| O | 5.227599998  | 3.247190143 | 10.350900000 |
| O | 7.761099988  | 3.247190143 | 1.478700000  |
| O | 7.761099988  | 3.247190143 | 4.436100000  |
| O | 11.721999998 | 3.247190143 | 1.478700000  |
| O | 11.721999998 | 3.247190143 | 4.436100000  |
| O | 7.761099988  | 3.247190143 | 7.393500000  |
| O | 7.761099988  | 3.247190143 | 10.350900000 |
| O | 11.721999998 | 3.247190143 | 7.393500000  |
| O | 11.721999998 | 3.247190143 | 10.350900000 |
| O | 9.741600000  | 4.513899978 | 8.872200000  |
| O | 9.741600000  | 4.513899978 | 5.914800000  |
| O | 9.741600000  | 4.513899978 | 2.957400000  |
| O | 9.741600000  | 4.513899978 | 0.000000000  |

|   |              |             |              |
|---|--------------|-------------|--------------|
| O | 3.247200000  | 4.513899978 | 8.872200000  |
| O | 3.247200000  | 4.513899978 | 5.914800000  |
| O | 3.247200000  | 4.513899978 | 2.957400000  |
| O | 3.247200000  | 4.513899978 | 0.000000000  |
| O | 0.000000000  | 5.227600085 | 2.957400000  |
| O | 0.000000000  | 5.227600085 | 0.000000000  |
| O | 0.000000000  | 5.227600085 | 8.872200000  |
| O | 0.000000000  | 5.227600085 | 5.914800000  |
| O | 6.494400000  | 5.227600085 | 0.000000000  |
| O | 6.494400000  | 5.227600085 | 2.957400000  |
| O | 6.494400000  | 5.227600085 | 8.872200000  |
| O | 6.494400000  | 5.227600085 | 5.914800000  |
| O | 8.474900012  | 6.494389931 | 7.393500000  |
| O | 11.008299988 | 6.494389931 | 7.393500000  |
| O | 8.474900012  | 6.494389931 | 10.350900000 |
| O | 11.008299988 | 6.494389931 | 10.350900000 |
| O | 8.474900012  | 6.494389931 | 1.478700000  |
| O | 11.008299988 | 6.494389931 | 1.478700000  |
| O | 8.474900012  | 6.494389931 | 4.436100000  |
| O | 11.008299988 | 6.494389931 | 4.436100000  |
| O | 1.980500012  | 6.494389931 | 1.478700000  |
| O | 4.513899988  | 6.494389931 | 1.478700000  |



|   |             |             |              |
|---|-------------|-------------|--------------|
| O | 1.980500012 | 6.494389931 | 4.436100000  |
| O | 4.513899988 | 6.494389931 | 4.436100000  |
| O | 1.980500012 | 6.494389931 | 7.393500000  |
| O | 4.513899988 | 6.494389931 | 7.393500000  |
| O | 1.980500012 | 6.494389931 | 10.350900000 |
| O | 4.513899988 | 6.494389931 | 10.350900000 |
| O | 0.000000000 | 7.761090122 | 8.872200000  |
| O | 0.000000000 | 7.761090122 | 5.914800000  |
| O | 6.494400000 | 7.761090122 | 2.957400000  |
| O | 6.494400000 | 7.761090122 | 0.000000000  |
| O | 0.000000000 | 7.761090122 | 2.957400000  |
| O | 0.000000000 | 7.761090122 | 0.000000000  |
| O | 6.494400000 | 7.761090122 | 8.872200000  |
| O | 6.494400000 | 7.761090122 | 5.914800000  |
| O | 3.247200000 | 8.474889884 | 2.957400000  |
| O | 3.247200000 | 8.474889884 | 0.000000000  |
| O | 3.247200000 | 8.474889884 | 8.872200000  |
| O | 3.247200000 | 8.474889884 | 5.914800000  |
| O | 9.741600000 | 8.474889884 | 2.957400000  |
| O | 9.741600000 | 8.474889884 | 0.000000000  |
| O | 9.741600000 | 8.474889884 | 8.872200000  |
| O | 9.741600000 | 8.474889884 | 5.914800000  |

|   |              |              |              |
|---|--------------|--------------|--------------|
| O | 1.265978720  | 9.792434606  | 1.480571443  |
| O | 1.265210952  | 9.790277537  | 4.438003738  |
| O | 5.210889257  | 9.774582620  | 1.480949044  |
| O | 5.210416725  | 9.775759203  | 4.436141758  |
| O | 1.264515012  | 9.790690806  | 7.393619597  |
| O | 1.265643219  | 9.793275431  | 10.352879802 |
| O | 5.209679740  | 9.771944059  | 7.393532058  |
| O | 5.210180459  | 9.775800637  | 10.353242734 |
| O | 7.761095962  | 9.783943134  | 1.479511156  |
| O | 7.759445085  | 9.783684886  | 4.438655667  |
| O | 11.706178471 | 9.784309254  | 1.481858621  |
| O | 11.704989736 | 9.781298501  | 4.435425358  |
| O | 7.758610035  | 9.781539604  | 7.392649097  |
| O | 7.759810980  | 9.783964923  | 10.352840291 |
| O | 11.704441608 | 9.782862992  | 7.395496245  |
| O | 11.705113779 | 9.783759539  | 10.352135010 |
| O | 9.730342477  | 11.073624199 | 2.958710246  |
| O | 9.729463785  | 11.072624782 | 0.001215137  |
| O | 3.236529571  | 11.072526912 | 2.958444435  |
| O | 3.238867165  | 11.073125919 | 0.001584457  |
| O | 3.236778566  | 11.072217586 | 8.871152134  |
| O | 3.237354360  | 11.072435829 | 5.914652130  |

|   |              |              |              |
|---|--------------|--------------|--------------|
| O | 9.730276104  | 11.071736094 | 8.871332772  |
| O | 9.729631600  | 11.073672062 | 5.915031860  |
| O | 6.462239082  | 11.788099764 | 8.872962536  |
| O | -0.031036867 | 11.820407576 | 2.961400416  |
| O | 6.462215312  | 11.802565591 | 0.010247864  |
| O | 6.461639779  | 11.796106887 | 5.912322882  |
| O | -0.031422635 | 11.821219111 | 0.005198399  |
| O | -0.032614877 | 11.817093213 | 5.913723152  |
| O | 6.464207405  | 11.802403070 | 2.953610506  |
| O | -0.031431597 | 11.819754633 | 8.872960998  |
| O | 8.437484215  | 13.097311964 | 1.483492171  |
| O | 8.434224675  | 13.092356671 | 4.437637020  |
| O | 10.975174262 | 13.117790366 | 1.481544309  |
| O | 10.975390915 | 13.122574208 | 4.438048927  |
| O | 1.945825631  | 13.100308786 | 1.481402590  |
| O | 1.944957719  | 13.103583501 | 4.437403740  |
| O | 4.483083930  | 13.115955840 | 1.482496237  |
| O | 4.486340742  | 13.108275189 | 4.437364466  |
| O | 1.945862909  | 13.101127107 | 7.389757706  |
| O | 1.946138791  | 13.095810695 | 10.352412059 |
| O | 4.487122928  | 13.107566524 | 7.392910768  |
| O | 4.482961706  | 13.108203036 | 10.347312319 |

|   |              |              |              |
|---|--------------|--------------|--------------|
| O | 8.433722009  | 13.090074585 | 7.393401341  |
| O | 8.438147163  | 13.089583807 | 10.347167170 |
| O | 10.974749788 | 13.120645741 | 7.389835072  |
| O | 10.974612237 | 13.114392777 | 10.352937057 |
| O | -0.035950790 | 14.439755668 | 2.960200421  |
| O | -0.033383554 | 14.438973065 | 5.913781471  |
| O | -0.033245353 | 14.431577452 | 8.874123611  |
| O | -0.032898942 | 14.439138444 | 0.006188182  |
| O | 6.457714693  | 14.427565497 | 2.970507670  |
| O | 6.461828376  | 14.409797450 | 5.911111767  |
| O | 6.459775366  | 14.394845488 | 8.863818374  |
| O | 6.464147916  | 14.397043991 | -0.008126935 |
| O | 9.692036688  | 15.108815987 | 8.874814815  |
| O | 3.188162137  | 15.109590731 | 8.874640801  |
| O | 9.675249573  | 15.112428247 | 5.913369920  |
| O | 9.678033202  | 15.112764719 | 2.963477812  |
| O | 3.200468376  | 15.110635154 | 2.960381887  |
| O | 9.693585472  | 15.108931002 | 0.002529997  |
| O | 3.182481096  | 15.109731821 | -0.001071052 |
| O | 3.200557089  | 15.109349985 | 5.913709311  |
| O | 1.233262401  | 16.474305216 | 10.349300165 |
| O | 5.163423636  | 16.489072511 | 4.438669981  |

|   |              |              |              |
|---|--------------|--------------|--------------|
| O | 5.160082397  | 16.432613315 | 7.392198271  |
| O | 7.722226458  | 16.448454680 | 1.465978566  |
| O | 7.714528256  | 16.498554113 | 4.431874940  |
| O | 5.157572831  | 16.423925032 | 10.356001752 |
| O | 11.648264269 | 16.466529195 | 1.479606029  |
| O | 11.644926537 | 16.454450110 | 4.442773669  |
| O | 1.232667384  | 16.464407131 | 4.438613672  |
| O | 1.232192124  | 16.476165103 | 1.483372929  |
| O | 5.156919884  | 16.435739082 | 1.460050281  |
| O | 7.720808601  | 16.441189084 | 7.398670245  |
| O | 7.724822270  | 16.436674562 | 10.351959104 |
| O | 1.232546978  | 16.466355958 | 7.395969429  |
| O | 11.649362472 | 16.458765676 | 7.396259727  |
| O | 11.651452500 | 16.466126642 | 10.349969129 |
| O | 3.202947029  | 17.747453753 | 8.867850493  |
| O | 3.207917193  | 17.741347595 | 0.000730478  |
| O | 9.677163472  | 17.739865257 | 2.959128659  |
| O | 9.669628929  | 17.740941113 | 5.931155368  |
| O | 3.197726440  | 17.736039755 | 2.960257085  |
| O | 3.188587780  | 17.733422269 | 5.923545623  |
| O | 9.670422805  | 17.742420950 | 8.871498741  |
| O | 9.662945542  | 17.739310542 | -0.003213866 |

|   |              |              |              |
|---|--------------|--------------|--------------|
| O | 6.433332897  | 18.535825804 | -0.050350326 |
| O | 6.455190709  | 18.566482328 | 6.006484605  |
| O | -0.055896521 | 18.505132132 | -0.003390837 |
| O | 6.423212544  | 18.490464850 | 2.800660284  |
| O | -0.062121144 | 18.513213550 | 5.914463211  |
| O | 6.419526062  | 18.436949969 | 8.922209989  |
| O | -0.056716375 | 18.517985605 | 8.861326705  |
| O | -0.068109890 | 18.502885052 | 2.985632878  |
| O | 1.955989367  | 19.983875513 | 4.451072133  |
| O | 4.390504310  | 19.986193317 | 1.494491333  |
| O | 4.449744408  | 19.895647503 | 4.465458583  |
| O | 1.967266373  | 19.982048844 | 7.393559858  |
| O | 1.957804682  | 19.938537062 | 10.350994637 |
| O | 4.467270066  | 19.961961208 | 7.388236656  |
| O | 4.424074643  | 19.977424666 | 10.351559618 |
| O | 8.463548710  | 19.975577280 | 1.498060323  |
| O | 8.414091386  | 19.907201520 | 4.456138633  |
| O | 10.918871061 | 19.896622989 | 1.486982140  |
| O | 10.907839154 | 19.932412686 | 4.462846844  |
| O | 8.393696892  | 20.008533035 | 7.403115335  |
| O | 8.432768631  | 19.996450735 | 10.344892574 |
| O | 10.898034948 | 19.953809781 | 7.393730204  |

|   |              |              |              |
|---|--------------|--------------|--------------|
| O | 10.901829106 | 19.937882690 | 10.353880941 |
| O | 1.940400859  | 19.922495313 | 1.497213442  |
| O | -0.057448164 | 21.098956517 | 0.026874958  |
| O | 6.426052285  | 21.289328290 | 2.987215797  |
| O | -0.093622491 | 21.124255909 | 2.970087364  |
| O | -0.053096526 | 21.158539338 | 5.905119838  |
| O | -0.061717972 | 21.110885226 | 8.867488389  |
| O | 6.413583816  | 21.175439413 | 8.837956029  |
| O | 6.435942087  | 21.203221631 | 0.043399490  |
| H | 0.000000000  | 0.932899949  | 9.814800036  |
| H | 0.816399984  | 0.932899949  | 8.400899982  |
| H | 6.457700016  | 0.932899949  | 6.856699960  |
| H | 0.834099951  | 0.932899949  | -0.439200043 |
| H | 0.000000000  | 0.932899949  | 3.900000036  |
| H | 0.816399984  | 0.932899949  | 2.486099982  |
| H | 6.457700016  | 0.932899949  | 0.941899960  |
| H | 0.834099951  | 0.932899949  | 5.475599957  |
| H | 6.494400000  | 0.932899949  | 9.814800036  |
| H | 7.310799984  | 0.932899949  | 8.400899982  |
| H | -0.036699984 | 0.932899949  | 6.856699960  |
| H | 7.328499951  | 0.932899949  | -0.439200043 |
| H | 6.494400000  | 0.932899949  | 3.900000036  |

|   |              |              |             |
|---|--------------|--------------|-------------|
| H | 7.310799984  | 0.932899949  | 2.486099982 |
| H | -0.036699984 | 0.932899949  | 0.941899960 |
| H | 7.328499951  | 0.932899949  | 5.475599957 |
| H | 6.426998129  | 21.292693375 | 4.362950249 |
| H | 7.188151421  | 21.764053101 | 8.800592001 |
| H | 0.541918064  | 21.858519429 | 2.958300233 |
| H | 0.738193250  | 21.725526258 | 5.896144603 |
